# Supplementary material for: Massively parallel identification of zipcodes in primary cortical neurons
Source: bioRxiv preprint, doi:10.1101/2021.10.21.465275, version 1 (2021-10-21)
Supplement: Table_S1 [file 465275_file04.xlsx]

## Sheet: A) Nzip reporter library design
Table S1. (A) List of genes and tiled 3'UTR fragments included in the N-zip library and (B) Neurite/Soma enrichment values. The table contains all tiles from all genes included in the first N-zip library as well as Neurite/Soma ratios. [A] The columns contain: A: ENSEMBL gene_id of the originating gene B: name of the originating gene C: total length of the used3’UTR sequence D: offset between til…
Source gene id	Source gene name	Total 3UTR length	tile offset	tile id	tile size	tile sequence
ENSMUSG00000008855	Hdac5	1437	25	1	100	GCCAGCAGAGGAGCCCATGGAGCAGGAGCCTGCCCTGTGACACCCTGGCCCCCATCCCTCTGGGCTTCATCATTGTGATTTTGTTTATTTTTTCTATTAA
ENSMUSG00000008855	Hdac5	1437	25	2	100	GAGCCTGCCCTGTGACACCCTGGCCCCCATCCCTCTGGGCTTCATCATTGTGATTTTGTTTATTTTTTCTATTAAAAACAAAAAGTCACACATTCAACAA
ENSMUSG00000008855	Hdac5	1437	25	3	100	CCCATCCCTCTGGGCTTCATCATTGTGATTTTGTTTATTTTTTCTATTAAAAACAAAAAGTCACACATTCAACAACGTGTGCCGTGTGGGTCTCTCAGCC
ENSMUSG00000008855	Hdac5	1437	25	4	100	TGATTTTGTTTATTTTTTCTATTAAAAACAAAAAGTCACACATTCAACAACGTGTGCCGTGTGGGTCTCTCAGCCTCGCCCGCCTCCAAGCTGTTTCAGA
ENSMUSG00000008855	Hdac5	1437	25	5	100	AAACAAAAAGTCACACATTCAACAACGTGTGCCGTGTGGGTCTCTCAGCCTCGCCCGCCTCCAAGCTGTTTCAGAACCCCCTCCCACTACAAGGGCCCTG
ENSMUSG00000008855	Hdac5	1437	25	6	100	CGTGTGCCGTGTGGGTCTCTCAGCCTCGCCCGCCTCCAAGCTGTTTCAGAACCCCCTCCCACTACAAGGGCCCTGGGTCAGCTTTCGAATCCATTCCTTC
ENSMUSG00000008855	Hdac5	1437	25	7	100	TCGCCCGCCTCCAAGCTGTTTCAGAACCCCCTCCCACTACAAGGGCCCTGGGTCAGCTTTCGAATCCATTCCTTCTATGGGGCATTGGGTGCAGTACCCA
ENSMUSG00000008855	Hdac5	1437	25	8	100	ACCCCCTCCCACTACAAGGGCCCTGGGTCAGCTTTCGAATCCATTCCTTCTATGGGGCATTGGGTGCAGTACCCACTTTGCCCATGTTGTATCCCATACC
ENSMUSG00000008855	Hdac5	1437	25	9	100	GGTCAGCTTTCGAATCCATTCCTTCTATGGGGCATTGGGTGCAGTACCCACTTTGCCCATGTTGTATCCCATACCCAATTCCCCGTACTCTTCTACCGTG
ENSMUSG00000008855	Hdac5	1437	25	10	100	TATGGGGCATTGGGTGCAGTACCCACTTTGCCCATGTTGTATCCCATACCCAATTCCCCGTACTCTTCTACCGTGGACAGTGCTCCAGGCAGTACTGCCA
ENSMUSG00000008855	Hdac5	1437	25	11	100	CTTTGCCCATGTTGTATCCCATACCCAATTCCCCGTACTCTTCTACCGTGGACAGTGCTCCAGGCAGTACTGCCAACTCTGGAGCTGCCTGAGATGGGAA
ENSMUSG00000008855	Hdac5	1437	25	12	100	CAATTCCCCGTACTCTTCTACCGTGGACAGTGCTCCAGGCAGTACTGCCAACTCTGGAGCTGCCTGAGATGGGAACAGTGATTGGTGCCTGGACTTCAGT
ENSMUSG00000008855	Hdac5	1437	25	13	100	GACAGTGCTCCAGGCAGTACTGCCAACTCTGGAGCTGCCTGAGATGGGAACAGTGATTGGTGCCTGGACTTCAGTTGGCTTTTGGGGAATGCCTTAATTT
ENSMUSG00000008855	Hdac5	1437	25	14	100	ACTCTGGAGCTGCCTGAGATGGGAACAGTGATTGGTGCCTGGACTTCAGTTGGCTTTTGGGGAATGCCTTAATTTGAAATCTGCCCCTCTCCACCCTCAG
ENSMUSG00000008855	Hdac5	1437	25	15	100	CAGTGATTGGTGCCTGGACTTCAGTTGGCTTTTGGGGAATGCCTTAATTTGAAATCTGCCCCTCTCCACCCTCAGGATGATGTACTACCATTTAAGATGC
ENSMUSG00000008855	Hdac5	1437	25	16	100	TGGCTTTTGGGGAATGCCTTAATTTGAAATCTGCCCCTCTCCACCCTCAGGATGATGTACTACCATTTAAGATGCAGAATCGAGGGAAGGTAGGCGTCCA
ENSMUSG00000008855	Hdac5	1437	25	17	100	GAAATCTGCCCCTCTCCACCCTCAGGATGATGTACTACCATTTAAGATGCAGAATCGAGGGAAGGTAGGCGTCCACCCCAAACTTTCCCTTCCTCTCTAT
ENSMUSG00000008855	Hdac5	1437	25	18	100	GATGATGTACTACCATTTAAGATGCAGAATCGAGGGAAGGTAGGCGTCCACCCCAAACTTTCCCTTCCTCTCTATCTCCCTCACCATTCTGCAGACTCTC
ENSMUSG00000008855	Hdac5	1437	25	19	100	AGAATCGAGGGAAGGTAGGCGTCCACCCCAAACTTTCCCTTCCTCTCTATCTCCCTCACCATTCTGCAGACTCTCCTCTTTGGCCTCAGCACTGAAGACT
ENSMUSG00000008855	Hdac5	1437	25	20	100	CCCCAAACTTTCCCTTCCTCTCTATCTCCCTCACCATTCTGCAGACTCTCCTCTTTGGCCTCAGCACTGAAGACTCGTGCCCAGGATGTAGGCCTTAGAC
ENSMUSG00000008855	Hdac5	1437	25	21	100	CTCCCTCACCATTCTGCAGACTCTCCTCTTTGGCCTCAGCACTGAAGACTCGTGCCCAGGATGTAGGCCTTAGACTTGTGGCCAGGCTTCTTGTCTCTTA
ENSMUSG00000008855	Hdac5	1437	25	22	100	CTCTTTGGCCTCAGCACTGAAGACTCGTGCCCAGGATGTAGGCCTTAGACTTGTGGCCAGGCTTCTTGTCTCTTACTCCTGAGTATCCCAGGAGCTCAAA
ENSMUSG00000008855	Hdac5	1437	25	23	100	CGTGCCCAGGATGTAGGCCTTAGACTTGTGGCCAGGCTTCTTGTCTCTTACTCCTGAGTATCCCAGGAGCTCAAAGGGTACCGGGTGGTGTGCAGCGGGG
ENSMUSG00000008855	Hdac5	1437	25	24	100	TTGTGGCCAGGCTTCTTGTCTCTTACTCCTGAGTATCCCAGGAGCTCAAAGGGTACCGGGTGGTGTGCAGCGGGGTTAGAAGGGGCCAGGAGGACCTGCG
ENSMUSG00000008855	Hdac5	1437	25	25	100	CTCCTGAGTATCCCAGGAGCTCAAAGGGTACCGGGTGGTGTGCAGCGGGGTTAGAAGGGGCCAGGAGGACCTGCGTATGCAGGCAGGTTCTCCACTTTTT
ENSMUSG00000008855	Hdac5	1437	25	26	100	GGGTACCGGGTGGTGTGCAGCGGGGTTAGAAGGGGCCAGGAGGACCTGCGTATGCAGGCAGGTTCTCCACTTTTTTTCTATTAAACTCTCCGTCTTGTGC
ENSMUSG00000008855	Hdac5	1437	25	27	100	TTAGAAGGGGCCAGGAGGACCTGCGTATGCAGGCAGGTTCTCCACTTTTTTTCTATTAAACTCTCCGTCTTGTGCTGGACCAGTATAAGGAGGGGAGAAG
ENSMUSG00000008855	Hdac5	1437	25	28	100	TATGCAGGCAGGTTCTCCACTTTTTTTCTATTAAACTCTCCGTCTTGTGCTGGACCAGTATAAGGAGGGGAGAAGGTAGACCCTGCATGGGGGCTTCAGG
ENSMUSG00000008855	Hdac5	1437	25	29	100	TTCTATTAAACTCTCCGTCTTGTGCTGGACCAGTATAAGGAGGGGAGAAGGTAGACCCTGCATGGGGGCTTCAGGTTCATGCAAGCCCCTCTGATGTTCT
ENSMUSG00000008855	Hdac5	1437	25	30	100	TGGACCAGTATAAGGAGGGGAGAAGGTAGACCCTGCATGGGGGCTTCAGGTTCATGCAAGCCCCTCTGATGTTCTGGGCCAGATTTTCTCCATCCATCAG
ENSMUSG00000008855	Hdac5	1437	25	31	100	GTAGACCCTGCATGGGGGCTTCAGGTTCATGCAAGCCCCTCTGATGTTCTGGGCCAGATTTTCTCCATCCATCAGCCTGCTGCAAGCAGAAGGGTCAAGA
ENSMUSG00000008855	Hdac5	1437	25	32	100	TTCATGCAAGCCCCTCTGATGTTCTGGGCCAGATTTTCTCCATCCATCAGCCTGCTGCAAGCAGAAGGGTCAAGATCCAGCTCCCTTCTGGAGCCTTTTT
ENSMUSG00000008855	Hdac5	1437	25	33	100	GGGCCAGATTTTCTCCATCCATCAGCCTGCTGCAAGCAGAAGGGTCAAGATCCAGCTCCCTTCTGGAGCCTTTTTGCTTTGAAACCTGGGGATCGTGAAA
ENSMUSG00000008855	Hdac5	1437	25	34	100	CCTGCTGCAAGCAGAAGGGTCAAGATCCAGCTCCCTTCTGGAGCCTTTTTGCTTTGAAACCTGGGGATCGTGAAAGACAGGGTAGATATAGTTCTAGAAT
ENSMUSG00000008855	Hdac5	1437	25	35	100	TCCAGCTCCCTTCTGGAGCCTTTTTGCTTTGAAACCTGGGGATCGTGAAAGACAGGGTAGATATAGTTCTAGAATAGACAGGGCCAGAACCCTGTCTAGA
ENSMUSG00000008855	Hdac5	1437	25	36	100	GCTTTGAAACCTGGGGATCGTGAAAGACAGGGTAGATATAGTTCTAGAATAGACAGGGCCAGAACCCTGTCTAGAAGCCACCCCTGTCCCCCAGAGGTGT
ENSMUSG00000008855	Hdac5	1437	25	37	100	GACAGGGTAGATATAGTTCTAGAATAGACAGGGCCAGAACCCTGTCTAGAAGCCACCCCTGTCCCCCAGAGGTGTTGGGGGGGGGGGAGTCCAGCTCTCA
ENSMUSG00000008855	Hdac5	1437	25	38	100	AGACAGGGCCAGAACCCTGTCTAGAAGCCACCCCTGTCCCCCAGAGGTGTTGGGGGGGGGGGAGTCCAGCTCTCAGCAGGAGGTTGTTAGGAGCTATCCA
ENSMUSG00000008855	Hdac5	1437	25	39	100	AGCCACCCCTGTCCCCCAGAGGTGTTGGGGGGGGGGGAGTCCAGCTCTCAGCAGGAGGTTGTTAGGAGCTATCCATCTTTTCCAGTAGCCTTGTGTCCAG
ENSMUSG00000008855	Hdac5	1437	25	40	100	TGGGGGGGGGGGAGTCCAGCTCTCAGCAGGAGGTTGTTAGGAGCTATCCATCTTTTCCAGTAGCCTTGTGTCCAGAGGCTGGAGCCCACAGACTTCCAGT
ENSMUSG00000008855	Hdac5	1437	25	41	100	GCAGGAGGTTGTTAGGAGCTATCCATCTTTTCCAGTAGCCTTGTGTCCAGAGGCTGGAGCCCACAGACTTCCAGTGAATGTGGTCTAGCCTGTAGGAAAC
ENSMUSG00000008855	Hdac5	1437	25	42	100	TCTTTTCCAGTAGCCTTGTGTCCAGAGGCTGGAGCCCACAGACTTCCAGTGAATGTGGTCTAGCCTGTAGGAAACCAAAGATGGGAAATGGCTCCTAAGG
ENSMUSG00000008855	Hdac5	1437	25	43	100	AGGCTGGAGCCCACAGACTTCCAGTGAATGTGGTCTAGCCTGTAGGAAACCAAAGATGGGAAATGGCTCCTAAGGGGCCAATTTTTCTTCCCCTATACCA
ENSMUSG00000008855	Hdac5	1437	25	44	100	GAATGTGGTCTAGCCTGTAGGAAACCAAAGATGGGAAATGGCTCCTAAGGGGCCAATTTTTCTTCCCCTATACCACATCCCCAGGGCTCAGCTATCTGTT
ENSMUSG00000008855	Hdac5	1437	25	45	100	CAAAGATGGGAAATGGCTCCTAAGGGGCCAATTTTTCTTCCCCTATACCACATCCCCAGGGCTCAGCTATCTGTTTCCATATTGTCCGTATGGGGCCTGA
ENSMUSG00000008855	Hdac5	1437	25	46	100	GGCCAATTTTTCTTCCCCTATACCACATCCCCAGGGCTCAGCTATCTGTTTCCATATTGTCCGTATGGGGCCTGAGCAGGGCTGAGGGAGCTGGGGAGTC
ENSMUSG00000008855	Hdac5	1437	25	47	100	CATCCCCAGGGCTCAGCTATCTGTTTCCATATTGTCCGTATGGGGCCTGAGCAGGGCTGAGGGAGCTGGGGAGTCCCACCACTATTAGTTTTCTGTGTGT
ENSMUSG00000008855	Hdac5	1437	25	48	100	TCCATATTGTCCGTATGGGGCCTGAGCAGGGCTGAGGGAGCTGGGGAGTCCCACCACTATTAGTTTTCTGTGTGTTTGCGTGCTGTCTGTATCATCCTTG
ENSMUSG00000008855	Hdac5	1437	25	49	100	GCAGGGCTGAGGGAGCTGGGGAGTCCCACCACTATTAGTTTTCTGTGTGTTTGCGTGCTGTCTGTATCATCCTTGCACTGAACCAGAGGCTGCTCACCTC
ENSMUSG00000008855	Hdac5	1437	25	50	100	CCACCACTATTAGTTTTCTGTGTGTTTGCGTGCTGTCTGTATCATCCTTGCACTGAACCAGAGGCTGCTCACCTCCCACTCTCTCCCCGTAGGCTGATCT
ENSMUSG00000008855	Hdac5	1437	25	51	100	TTGCGTGCTGTCTGTATCATCCTTGCACTGAACCAGAGGCTGCTCACCTCCCACTCTCTCCCCGTAGGCTGATCTTATCCTGTGCCAACCCACTCCTGCT
ENSMUSG00000008855	Hdac5	1437	25	52	100	CACTGAACCAGAGGCTGCTCACCTCCCACTCTCTCCCCGTAGGCTGATCTTATCCTGTGCCAACCCACTCCTGCTTTGTCTCCCTGGACATGGATTTTAG
ENSMUSG00000008855	Hdac5	1437	25	53	100	CCACTCTCTCCCCGTAGGCTGATCTTATCCTGTGCCAACCCACTCCTGCTTTGTCTCCCTGGACATGGATTTTAGTTCAGTAGTTTGTATCCCAACACAT
ENSMUSG00000008855	Hdac5	1437	25	54	100	TATCCTGTGCCAACCCACTCCTGCTTTGTCTCCCTGGACATGGATTTTAGTTCAGTAGTTTGTATCCCAACACATGGTTTTTGTCTTCGTGTAAATAAAC
ENSMUSG00000008855	Hdac5	1437	25	55	87	TTGTCTCCCTGGACATGGATTTTAGTTCAGTAGTTTGTATCCCAACACATGGTTTTTGTCTTCGTGTAAATAAACTTATTTGTGGCA
ENSMUSG00000041219	Arhgap11a	2849	25	1	100	AATTTAACCTCAAATTCTTGTATCTGTTTCTTTAAGGCAAAGTATACTATTTTGTGTTCTGGAAGTTTAAAGTTCTCATTTGAATGGTGAAAAGTATTTG
ENSMUSG00000041219	Arhgap11a	2849	25	2	100	GTTTCTTTAAGGCAAAGTATACTATTTTGTGTTCTGGAAGTTTAAAGTTCTCATTTGAATGGTGAAAAGTATTTGACTTGGCAGTGTAGCTTTCTGTTAG
ENSMUSG00000041219	Arhgap11a	2849	25	3	100	TTTGTGTTCTGGAAGTTTAAAGTTCTCATTTGAATGGTGAAAAGTATTTGACTTGGCAGTGTAGCTTTCTGTTAGTATCTGGGGGATGCGTGTGAGTATC
ENSMUSG00000041219	Arhgap11a	2849	25	4	100	TCATTTGAATGGTGAAAAGTATTTGACTTGGCAGTGTAGCTTTCTGTTAGTATCTGGGGGATGCGTGTGAGTATCAGCACTGTACAGTTTTTACCTTAAA
ENSMUSG00000041219	Arhgap11a	2849	25	5	100	ACTTGGCAGTGTAGCTTTCTGTTAGTATCTGGGGGATGCGTGTGAGTATCAGCACTGTACAGTTTTTACCTTAAATTATAGCATCCTCAGTGTTCTGGAA
ENSMUSG00000041219	Arhgap11a	2849	25	6	100	TATCTGGGGGATGCGTGTGAGTATCAGCACTGTACAGTTTTTACCTTAAATTATAGCATCCTCAGTGTTCTGGAAACAATGCTCAGTAACTTTGTTATAT
ENSMUSG00000041219	Arhgap11a	2849	25	7	100	AGCACTGTACAGTTTTTACCTTAAATTATAGCATCCTCAGTGTTCTGGAAACAATGCTCAGTAACTTTGTTATATGTTCGGAATATATTTCAAAACTAGG
ENSMUSG00000041219	Arhgap11a	2849	25	8	100	TTATAGCATCCTCAGTGTTCTGGAAACAATGCTCAGTAACTTTGTTATATGTTCGGAATATATTTCAAAACTAGGCAAGATGTAAGGTATTAAAAAGCAT
ENSMUSG00000041219	Arhgap11a	2849	25	9	100	ACAATGCTCAGTAACTTTGTTATATGTTCGGAATATATTTCAAAACTAGGCAAGATGTAAGGTATTAAAAAGCATTAACTGCTTTATTTTAGGCTCAGAA
ENSMUSG00000041219	Arhgap11a	2849	25	10	100	GTTCGGAATATATTTCAAAACTAGGCAAGATGTAAGGTATTAAAAAGCATTAACTGCTTTATTTTAGGCTCAGAAAAGATCAGCAAATCTGAGGAACACT
ENSMUSG00000041219	Arhgap11a	2849	25	11	100	CAAGATGTAAGGTATTAAAAAGCATTAACTGCTTTATTTTAGGCTCAGAAAAGATCAGCAAATCTGAGGAACACTTGTTAACTCCAGATCAACTAGATGG
ENSMUSG00000041219	Arhgap11a	2849	25	12	100	TAACTGCTTTATTTTAGGCTCAGAAAAGATCAGCAAATCTGAGGAACACTTGTTAACTCCAGATCAACTAGATGGAACAGGTTACCGGATGTCTTGGACA
ENSMUSG00000041219	Arhgap11a	2849	25	13	100	AAGATCAGCAAATCTGAGGAACACTTGTTAACTCCAGATCAACTAGATGGAACAGGTTACCGGATGTCTTGGACAGAACCCAGTAATTCAAGTTTTCAAG
ENSMUSG00000041219	Arhgap11a	2849	25	14	100	TGTTAACTCCAGATCAACTAGATGGAACAGGTTACCGGATGTCTTGGACAGAACCCAGTAATTCAAGTTTTCAAGACATGAGTGCAAATGGAACTTCTCC
ENSMUSG00000041219	Arhgap11a	2849	25	15	100	AACAGGTTACCGGATGTCTTGGACAGAACCCAGTAATTCAAGTTTTCAAGACATGAGTGCAAATGGAACTTCTCCAATAATGCAAAATCTTGAGGTGAAG
ENSMUSG00000041219	Arhgap11a	2849	25	16	100	GAACCCAGTAATTCAAGTTTTCAAGACATGAGTGCAAATGGAACTTCTCCAATAATGCAAAATCTTGAGGTGAAGAGCTTTTCTTTGGAGCCCGACATTA
ENSMUSG00000041219	Arhgap11a	2849	25	17	100	ACATGAGTGCAAATGGAACTTCTCCAATAATGCAAAATCTTGAGGTGAAGAGCTTTTCTTTGGAGCCCGACATTACTGTTGAAAAATCACCAGTTGTGTC
ENSMUSG00000041219	Arhgap11a	2849	25	18	100	AATAATGCAAAATCTTGAGGTGAAGAGCTTTTCTTTGGAGCCCGACATTACTGTTGAAAAATCACCAGTTGTGTCCTGTGAGCTCAGGCCTTCCACCTTC
ENSMUSG00000041219	Arhgap11a	2849	25	19	100	AGCTTTTCTTTGGAGCCCGACATTACTGTTGAAAAATCACCAGTTGTGTCCTGTGAGCTCAGGCCTTCCACCTTCCATAGCCAGCCTGACAGCAGTGTGC
ENSMUSG00000041219	Arhgap11a	2849	25	20	100	CTGTTGAAAAATCACCAGTTGTGTCCTGTGAGCTCAGGCCTTCCACCTTCCATAGCCAGCCTGACAGCAGTGTGCTGTCTCTTAGTGGGGATGAAGGGAA
ENSMUSG00000041219	Arhgap11a	2849	25	21	100	CTGTGAGCTCAGGCCTTCCACCTTCCATAGCCAGCCTGACAGCAGTGTGCTGTCTCTTAGTGGGGATGAAGGGAACCTGGCCTCCGAGACCTTGCAGAAG
ENSMUSG00000041219	Arhgap11a	2849	25	22	100	CATAGCCAGCCTGACAGCAGTGTGCTGTCTCTTAGTGGGGATGAAGGGAACCTGGCCTCCGAGACCTTGCAGAAGATTCAGAAAGCATTTTCCGAATCTG
ENSMUSG00000041219	Arhgap11a	2849	25	23	100	TGTCTCTTAGTGGGGATGAAGGGAACCTGGCCTCCGAGACCTTGCAGAAGATTCAGAAAGCATTTTCCGAATCTGGGAGTGATCTTCATATGGTGATAAA
ENSMUSG00000041219	Arhgap11a	2849	25	24	100	CCTGGCCTCCGAGACCTTGCAGAAGATTCAGAAAGCATTTTCCGAATCTGGGAGTGATCTTCATATGGTGATAAATCATGAGCAGTCATCAGTAACAAAT
ENSMUSG00000041219	Arhgap11a	2849	25	25	100	ATTCAGAAAGCATTTTCCGAATCTGGGAGTGATCTTCATATGGTGATAAATCATGAGCAGTCATCAGTAACAAATACGGGGGAAGAAGTGGAATTCAGAG
ENSMUSG00000041219	Arhgap11a	2849	25	26	100	GGAGTGATCTTCATATGGTGATAAATCATGAGCAGTCATCAGTAACAAATACGGGGGAAGAAGTGGAATTCAGAGATGTGACTGTGACTGAGTCAAAGGG
ENSMUSG00000041219	Arhgap11a	2849	25	27	100	TCATGAGCAGTCATCAGTAACAAATACGGGGGAAGAAGTGGAATTCAGAGATGTGACTGTGACTGAGTCAAAGGGACATGATGGGAGCTGTGCTGGGGAG
ENSMUSG00000041219	Arhgap11a	2849	25	28	100	ACGGGGGAAGAAGTGGAATTCAGAGATGTGACTGTGACTGAGTCAAAGGGACATGATGGGAGCTGTGCTGGGGAGGAGGAGAACTGTCCTTCAGAACGGA
ENSMUSG00000041219	Arhgap11a	2849	25	29	100	ATGTGACTGTGACTGAGTCAAAGGGACATGATGGGAGCTGTGCTGGGGAGGAGGAGAACTGTCCTTCAGAACGGAATTTCTCACCGGATCAAAGCCCAGA
ENSMUSG00000041219	Arhgap11a	2849	25	30	100	ACATGATGGGAGCTGTGCTGGGGAGGAGGAGAACTGTCCTTCAGAACGGAATTTCTCACCGGATCAAAGCCCAGAGTTTGCCAGAGAAGCTGATGAGGAA
ENSMUSG00000041219	Arhgap11a	2849	25	31	100	GAGGAGAACTGTCCTTCAGAACGGAATTTCTCACCGGATCAAAGCCCAGAGTTTGCCAGAGAAGCTGATGAGGAATGTTACTCAACTCAGATGAAGGTGG
ENSMUSG00000041219	Arhgap11a	2849	25	32	100	ATTTCTCACCGGATCAAAGCCCAGAGTTTGCCAGAGAAGCTGATGAGGAATGTTACTCAACTCAGATGAAGGTGGAATGTGAAGGCCTGCACTCAGAAAC
ENSMUSG00000041219	Arhgap11a	2849	25	33	100	GTTTGCCAGAGAAGCTGATGAGGAATGTTACTCAACTCAGATGAAGGTGGAATGTGAAGGCCTGCACTCAGAAACACCCAAAGCTGACCCCCTCATCCTG
ENSMUSG00000041219	Arhgap11a	2849	25	34	100	TGTTACTCAACTCAGATGAAGGTGGAATGTGAAGGCCTGCACTCAGAAACACCCAAAGCTGACCCCCTCATCCTGCAAGCATTCCCCGGTGAGGAGCCAG
ENSMUSG00000041219	Arhgap11a	2849	25	35	100	AATGTGAAGGCCTGCACTCAGAAACACCCAAAGCTGACCCCCTCATCCTGCAAGCATTCCCCGGTGAGGAGCCAGCTGAGGAACCACAGTCCCCAAGGAA
ENSMUSG00000041219	Arhgap11a	2849	25	36	100	ACCCAAAGCTGACCCCCTCATCCTGCAAGCATTCCCCGGTGAGGAGCCAGCTGAGGAACCACAGTCCCCAAGGAACCAGCTAAGCACTCCATCACGGGGG
ENSMUSG00000041219	Arhgap11a	2849	25	37	100	CAAGCATTCCCCGGTGAGGAGCCAGCTGAGGAACCACAGTCCCCAAGGAACCAGCTAAGCACTCCATCACGGGGGAATGAGAATGGGGGGGAGAGCGCTG
ENSMUSG00000041219	Arhgap11a	2849	25	38	100	CTGAGGAACCACAGTCCCCAAGGAACCAGCTAAGCACTCCATCACGGGGGAATGAGAATGGGGGGGAGAGCGCTGGGGCAAGTGGAGCTCCCGGAGAAGA
ENSMUSG00000041219	Arhgap11a	2849	25	39	100	CCAGCTAAGCACTCCATCACGGGGGAATGAGAATGGGGGGGAGAGCGCTGGGGCAAGTGGAGCTCCCGGAGAAGATGAGAGCACGTGCAGTGTGGCGGTC
ENSMUSG00000041219	Arhgap11a	2849	25	40	100	AATGAGAATGGGGGGGAGAGCGCTGGGGCAAGTGGAGCTCCCGGAGAAGATGAGAGCACGTGCAGTGTGGCGGTCCTTTCGAAACCTCGGCCCCAGAGAC
ENSMUSG00000041219	Arhgap11a	2849	25	41	100	GGGCAAGTGGAGCTCCCGGAGAAGATGAGAGCACGTGCAGTGTGGCGGTCCTTTCGAAACCTCGGCCCCAGAGACTTTCGAGGCAACAGTCACTGGTGGA
ENSMUSG00000041219	Arhgap11a	2849	25	42	100	TGAGAGCACGTGCAGTGTGGCGGTCCTTTCGAAACCTCGGCCCCAGAGACTTTCGAGGCAACAGTCACTGGTGGAAAAATGTGATAGTGTAGCTCCTGGG
ENSMUSG00000041219	Arhgap11a	2849	25	43	100	CTTTCGAAACCTCGGCCCCAGAGACTTTCGAGGCAACAGTCACTGGTGGAAAAATGTGATAGTGTAGCTCCTGGGGCTCTACAAGTGACAGAGCACGGGA
ENSMUSG00000041219	Arhgap11a	2849	25	44	100	TTTCGAGGCAACAGTCACTGGTGGAAAAATGTGATAGTGTAGCTCCTGGGGCTCTACAAGTGACAGAGCACGGGAAGGTTTCTGATCACATACAGTGGTT
ENSMUSG00000041219	Arhgap11a	2849	25	45	100	AAAATGTGATAGTGTAGCTCCTGGGGCTCTACAAGTGACAGAGCACGGGAAGGTTTCTGATCACATACAGTGGTTTAATAAACTTTCTCTAAATGAACCG
ENSMUSG00000041219	Arhgap11a	2849	25	46	100	GCTCTACAAGTGACAGAGCACGGGAAGGTTTCTGATCACATACAGTGGTTTAATAAACTTTCTCTAAATGAACCGAACAGAGGAAAAGTGAAGTCACCTC
ENSMUSG00000041219	Arhgap11a	2849	25	47	100	AGGTTTCTGATCACATACAGTGGTTTAATAAACTTTCTCTAAATGAACCGAACAGAGGAAAAGTGAAGTCACCTCTTAAATTTCAGCGTACTCCTGTCCG
ENSMUSG00000041219	Arhgap11a	2849	25	48	100	TAATAAACTTTCTCTAAATGAACCGAACAGAGGAAAAGTGAAGTCACCTCTTAAATTTCAGCGTACTCCTGTCCGTCAGTCCGTCAGAAGAATTAATTCT
ENSMUSG00000041219	Arhgap11a	2849	25	49	100	AACAGAGGAAAAGTGAAGTCACCTCTTAAATTTCAGCGTACTCCTGTCCGTCAGTCCGTCAGAAGAATTAATTCTTTGTTGGAGTATGGCAGGCAGCCTG
ENSMUSG00000041219	Arhgap11a	2849	25	50	100	TTAAATTTCAGCGTACTCCTGTCCGTCAGTCCGTCAGAAGAATTAATTCTTTGTTGGAGTATGGCAGGCAGCCTGTGAGGCAGAAGTTGGCAATCTTTGG
ENSMUSG00000041219	Arhgap11a	2849	25	51	100	TCAGTCCGTCAGAAGAATTAATTCTTTGTTGGAGTATGGCAGGCAGCCTGTGAGGCAGAAGTTGGCAATCTTTGGTGACGCAGCTTCTCCTCTCGTTAAA
ENSMUSG00000041219	Arhgap11a	2849	25	52	100	TTGTTGGAGTATGGCAGGCAGCCTGTGAGGCAGAAGTTGGCAATCTTTGGTGACGCAGCTTCTCCTCTCGTTAAATCAGTGAGCTGTGACAGTGCCCTTC
ENSMUSG00000041219	Arhgap11a	2849	25	53	100	TGAGGCAGAAGTTGGCAATCTTTGGTGACGCAGCTTCTCCTCTCGTTAAATCAGTGAGCTGTGACAGTGCCCTTCCCTCTTGTGTACAAAACACATCAAA
ENSMUSG00000041219	Arhgap11a	2849	25	54	100	TGACGCAGCTTCTCCTCTCGTTAAATCAGTGAGCTGTGACAGTGCCCTTCCCTCTTGTGTACAAAACACATCAAAAGGTCCCACTGCTCCACTTATCACG
ENSMUSG00000041219	Arhgap11a	2849	25	55	100	TCAGTGAGCTGTGACAGTGCCCTTCCCTCTTGTGTACAAAACACATCAAAAGGTCCCACTGCTCCACTTATCACGTCAGGCCTCGAAGCACAGAAGTCTA
ENSMUSG00000041219	Arhgap11a	2849	25	56	100	CCTCTTGTGTACAAAACACATCAAAAGGTCCCACTGCTCCACTTATCACGTCAGGCCTCGAAGCACAGAAGTCTACGTCTTGTAATAAATCAAGTGTTGA
ENSMUSG00000041219	Arhgap11a	2849	25	57	100	AGGTCCCACTGCTCCACTTATCACGTCAGGCCTCGAAGCACAGAAGTCTACGTCTTGTAATAAATCAAGTGTTGAGTTAACTTCTAAATCTTTCACAAAA
ENSMUSG00000041219	Arhgap11a	2849	25	58	100	TCAGGCCTCGAAGCACAGAAGTCTACGTCTTGTAATAAATCAAGTGTTGAGTTAACTTCTAAATCTTTCACAAAAATGAAGAGACATCCGGATCCTTTGA
ENSMUSG00000041219	Arhgap11a	2849	25	59	100	CGTCTTGTAATAAATCAAGTGTTGAGTTAACTTCTAAATCTTTCACAAAAATGAAGAGACATCCGGATCCTTTGAGTGCTTCTCTTGGGACTCCCAGACT
ENSMUSG00000041219	Arhgap11a	2849	25	60	100	GTTAACTTCTAAATCTTTCACAAAAATGAAGAGACATCCGGATCCTTTGAGTGCTTCTCTTGGGACTCCCAGACTTTGTAAGCAGGAGAACAAATCTAAT
ENSMUSG00000041219	Arhgap11a	2849	25	61	100	ATGAAGAGACATCCGGATCCTTTGAGTGCTTCTCTTGGGACTCCCAGACTTTGTAAGCAGGAGAACAAATCTAATGGCCACATTAAGTTTCCTTTGGATG
ENSMUSG00000041219	Arhgap11a	2849	25	62	100	GTGCTTCTCTTGGGACTCCCAGACTTTGTAAGCAGGAGAACAAATCTAATGGCCACATTAAGTTTCCTTTGGATGATCTCACGAATCATGAGAGATTAAA
ENSMUSG00000041219	Arhgap11a	2849	25	63	100	TTGTAAGCAGGAGAACAAATCTAATGGCCACATTAAGTTTCCTTTGGATGATCTCACGAATCATGAGAGATTAAAATTTGTTGTAAATAACAATGTGGCC
ENSMUSG00000041219	Arhgap11a	2849	25	64	100	GGCCACATTAAGTTTCCTTTGGATGATCTCACGAATCATGAGAGATTAAAATTTGTTGTAAATAACAATGTGGCCTTTTCTCCAGGGATGAAAAACAGAG
ENSMUSG00000041219	Arhgap11a	2849	25	65	100	ATCTCACGAATCATGAGAGATTAAAATTTGTTGTAAATAACAATGTGGCCTTTTCTCCAGGGATGAAAAACAGAGTTGTTAGGAAACCATCAGAAAAAGA
ENSMUSG00000041219	Arhgap11a	2849	25	66	100	ATTTGTTGTAAATAACAATGTGGCCTTTTCTCCAGGGATGAAAAACAGAGTTGTTAGGAAACCATCAGAAAAAGAAAGGGTCTGGTACAAAGGGTCTCCT
ENSMUSG00000041219	Arhgap11a	2849	25	67	100	TTTTCTCCAGGGATGAAAAACAGAGTTGTTAGGAAACCATCAGAAAAAGAAAGGGTCTGGTACAAAGGGTCTCCTAAAAATCCTATTGGGAAGACTCAAC
ENSMUSG00000041219	Arhgap11a	2849	25	68	100	TTGTTAGGAAACCATCAGAAAAAGAAAGGGTCTGGTACAAAGGGTCTCCTAAAAATCCTATTGGGAAGACTCAACTGCTACCAACGAGTAAGCCTGTCGA
ENSMUSG00000041219	Arhgap11a	2849	25	69	100	AAGGGTCTGGTACAAAGGGTCTCCTAAAAATCCTATTGGGAAGACTCAACTGCTACCAACGAGTAAGCCTGTCGACTTGTAACCGTCAAATGTGGCGTGC
ENSMUSG00000041219	Arhgap11a	2849	25	70	100	AAAAATCCTATTGGGAAGACTCAACTGCTACCAACGAGTAAGCCTGTCGACTTGTAACCGTCAAATGTGGCGTGCTCGTCATCAGTGTAAATAAAATTGC
ENSMUSG00000041219	Arhgap11a	2849	25	71	100	TGCTACCAACGAGTAAGCCTGTCGACTTGTAACCGTCAAATGTGGCGTGCTCGTCATCAGTGTAAATAAAATTGCTGGGTCAGGTTGCAGAATGCTCAAG
ENSMUSG00000041219	Arhgap11a	2849	25	72	100	CTTGTAACCGTCAAATGTGGCGTGCTCGTCATCAGTGTAAATAAAATTGCTGGGTCAGGTTGCAGAATGCTCAAGTGCTGGTGTGTAGATATGTCGGGCG
ENSMUSG00000041219	Arhgap11a	2849	25	73	100	TCGTCATCAGTGTAAATAAAATTGCTGGGTCAGGTTGCAGAATGCTCAAGTGCTGGTGTGTAGATATGTCGGGCGGGCAGTTGCAGGATGCTTGTGTGCT
ENSMUSG00000041219	Arhgap11a	2849	25	74	100	TGGGTCAGGTTGCAGAATGCTCAAGTGCTGGTGTGTAGATATGTCGGGCGGGCAGTTGCAGGATGCTTGTGTGCTGGTGTGTAGATACAGCGGGCGGGCA
ENSMUSG00000041219	Arhgap11a	2849	25	75	100	TGCTGGTGTGTAGATATGTCGGGCGGGCAGTTGCAGGATGCTTGTGTGCTGGTGTGTAGATACAGCGGGCGGGCAGTTGCAGGATGCTTGTGTGCTGGTG
ENSMUSG00000041219	Arhgap11a	2849	25	76	100	GGCAGTTGCAGGATGCTTGTGTGCTGGTGTGTAGATACAGCGGGCGGGCAGTTGCAGGATGCTTGTGTGCTGGTGTGTAGATATGTCGGGCGGGCAGTTG
ENSMUSG00000041219	Arhgap11a	2849	25	77	100	GGTGTGTAGATACAGCGGGCGGGCAGTTGCAGGATGCTTGTGTGCTGGTGTGTAGATATGTCGGGCGGGCAGTTGCAGGATGCTTGTGTGCTGGTGTGTA
ENSMUSG00000041219	Arhgap11a	2849	25	78	100	GTTGCAGGATGCTTGTGTGCTGGTGTGTAGATATGTCGGGCGGGCAGTTGCAGGATGCTTGTGTGCTGGTGTGTAGATATGGCGGGCGGGCGGGCAGTTG
ENSMUSG00000041219	Arhgap11a	2849	25	79	100	TGTAGATATGTCGGGCGGGCAGTTGCAGGATGCTTGTGTGCTGGTGTGTAGATATGGCGGGCGGGCGGGCAGTTGCAGGATGCTTGTGTGCTGGTGTGTA
ENSMUSG00000041219	Arhgap11a	2849	25	80	100	CAGGATGCTTGTGTGCTGGTGTGTAGATATGGCGGGCGGGCGGGCAGTTGCAGGATGCTTGTGTGCTGGTGTGTAGATCGGGGTGCTTGTTAAGTAGGGT
ENSMUSG00000041219	Arhgap11a	2849	25	81	100	GATATGGCGGGCGGGCGGGCAGTTGCAGGATGCTTGTGTGCTGGTGTGTAGATCGGGGTGCTTGTTAAGTAGGGTCTGTCTGAAGTGGTCCCACTGTAGA
ENSMUSG00000041219	Arhgap11a	2849	25	82	100	CAGGATGCTTGTGTGCTGGTGTGTAGATCGGGGTGCTTGTTAAGTAGGGTCTGTCTGAAGTGGTCCCACTGTAGAGCAGTTTGGACTTTCATACTTGCAC
ENSMUSG00000041219	Arhgap11a	2849	25	83	100	GATCGGGGTGCTTGTTAAGTAGGGTCTGTCTGAAGTGGTCCCACTGTAGAGCAGTTTGGACTTTCATACTTGCACATGGGGCTACTTTGTTTTTCTTTAT
ENSMUSG00000041219	Arhgap11a	2849	25	84	100	CTGTCTGAAGTGGTCCCACTGTAGAGCAGTTTGGACTTTCATACTTGCACATGGGGCTACTTTGTTTTTCTTTATTACTGAAGCATTTACACATAACTTT
ENSMUSG00000041219	Arhgap11a	2849	25	85	100	GCAGTTTGGACTTTCATACTTGCACATGGGGCTACTTTGTTTTTCTTTATTACTGAAGCATTTACACATAACTTTATTGTGATTTCCTGAAGCAGGGGTT
ENSMUSG00000041219	Arhgap11a	2849	25	86	100	ATGGGGCTACTTTGTTTTTCTTTATTACTGAAGCATTTACACATAACTTTATTGTGATTTCCTGAAGCAGGGGTTATAATAACTTTAGAAGATACTGTTG
ENSMUSG00000041219	Arhgap11a	2849	25	87	100	TACTGAAGCATTTACACATAACTTTATTGTGATTTCCTGAAGCAGGGGTTATAATAACTTTAGAAGATACTGTTGGCTAGGTTTATTTATATAAAAGGGA
ENSMUSG00000041219	Arhgap11a	2849	25	88	100	ATTGTGATTTCCTGAAGCAGGGGTTATAATAACTTTAGAAGATACTGTTGGCTAGGTTTATTTATATAAAAGGGACATGAGTTTTATTCTGCATGCTTGA
ENSMUSG00000041219	Arhgap11a	2849	25	89	100	ATAATAACTTTAGAAGATACTGTTGGCTAGGTTTATTTATATAAAAGGGACATGAGTTTTATTCTGCATGCTTGATCAGAAGAATACAGGAAGTTGTGCT
ENSMUSG00000041219	Arhgap11a	2849	25	90	100	GCTAGGTTTATTTATATAAAAGGGACATGAGTTTTATTCTGCATGCTTGATCAGAAGAATACAGGAAGTTGTGCTTGTGCCTCTTGTTATTCCTTCACAT
ENSMUSG00000041219	Arhgap11a	2849	25	91	100	CATGAGTTTTATTCTGCATGCTTGATCAGAAGAATACAGGAAGTTGTGCTTGTGCCTCTTGTTATTCCTTCACATCAGGAACATTGTTCACAGAAACTTC
ENSMUSG00000041219	Arhgap11a	2849	25	92	100	TCAGAAGAATACAGGAAGTTGTGCTTGTGCCTCTTGTTATTCCTTCACATCAGGAACATTGTTCACAGAAACTTCTAGTACATAAAGGGAATGATGAAGC
ENSMUSG00000041219	Arhgap11a	2849	25	93	100	TGTGCCTCTTGTTATTCCTTCACATCAGGAACATTGTTCACAGAAACTTCTAGTACATAAAGGGAATGATGAAGCCCTGCAAACCTTATGTCTTGAATTA
ENSMUSG00000041219	Arhgap11a	2849	25	94	100	CAGGAACATTGTTCACAGAAACTTCTAGTACATAAAGGGAATGATGAAGCCCTGCAAACCTTATGTCTTGAATTATTCATGTTTGTTGCCTTGACCCAAA
ENSMUSG00000041219	Arhgap11a	2849	25	95	100	TAGTACATAAAGGGAATGATGAAGCCCTGCAAACCTTATGTCTTGAATTATTCATGTTTGTTGCCTTGACCCAAAACCAAGAAGTTAATTGGCCTCAGTG
ENSMUSG00000041219	Arhgap11a	2849	25	96	100	CCTGCAAACCTTATGTCTTGAATTATTCATGTTTGTTGCCTTGACCCAAAACCAAGAAGTTAATTGGCCTCAGTGGTATGTGAACACTTTTGTTGGAGAC
ENSMUSG00000041219	Arhgap11a	2849	25	97	100	TTCATGTTTGTTGCCTTGACCCAAAACCAAGAAGTTAATTGGCCTCAGTGGTATGTGAACACTTTTGTTGGAGACAGAGGGATTTATTTGGTCAGCATCG
ENSMUSG00000041219	Arhgap11a	2849	25	98	100	ACCAAGAAGTTAATTGGCCTCAGTGGTATGTGAACACTTTTGTTGGAGACAGAGGGATTTATTTGGTCAGCATCGCCTGTGGTTTCACTTGAATTTTGAA
ENSMUSG00000041219	Arhgap11a	2849	25	99	100	GTATGTGAACACTTTTGTTGGAGACAGAGGGATTTATTTGGTCAGCATCGCCTGTGGTTTCACTTGAATTTTGAATTAAAGACAGTGAATAAAGCATAAT
ENSMUSG00000041219	Arhgap11a	2849	25	100	100	AGAGGGATTTATTTGGTCAGCATCGCCTGTGGTTTCACTTGAATTTTGAATTAAAGACAGTGAATAAAGCATAATGACAACAAAGGTACTGCATACTTTA
ENSMUSG00000041219	Arhgap11a	2849	25	101	100	CCTGTGGTTTCACTTGAATTTTGAATTAAAGACAGTGAATAAAGCATAATGACAACAAAGGTACTGCATACTTTATAATGTTGAGGTAAATGATTAATCG
ENSMUSG00000041219	Arhgap11a	2849	25	102	100	TTAAAGACAGTGAATAAAGCATAATGACAACAAAGGTACTGCATACTTTATAATGTTGAGGTAAATGATTAATCGTAAGCCATACTTCATTTTTAAAGGT
ENSMUSG00000041219	Arhgap11a	2849	25	103	100	GACAACAAAGGTACTGCATACTTTATAATGTTGAGGTAAATGATTAATCGTAAGCCATACTTCATTTTTAAAGGTGATTTGGATCATATTTTGTCCAGTA
ENSMUSG00000041219	Arhgap11a	2849	25	104	100	TAATGTTGAGGTAAATGATTAATCGTAAGCCATACTTCATTTTTAAAGGTGATTTGGATCATATTTTGTCCAGTATGACAATGAAATTTTTAGGCAGGTA
ENSMUSG00000041219	Arhgap11a	2849	25	105	100	TAAGCCATACTTCATTTTTAAAGGTGATTTGGATCATATTTTGTCCAGTATGACAATGAAATTTTTAGGCAGGTATAGTTAAACTGGAAAATTTTAATCA
ENSMUSG00000041219	Arhgap11a	2849	25	106	100	GATTTGGATCATATTTTGTCCAGTATGACAATGAAATTTTTAGGCAGGTATAGTTAAACTGGAAAATTTTAATCAAGTTGTTTTTTTCCTATGAAGATGG
ENSMUSG00000041219	Arhgap11a	2849	25	107	100	TGACAATGAAATTTTTAGGCAGGTATAGTTAAACTGGAAAATTTTAATCAAGTTGTTTTTTTCCTATGAAGATGGTTGATTTTAGAATTGAATTGTTAAT
ENSMUSG00000041219	Arhgap11a	2849	25	108	100	TAGTTAAACTGGAAAATTTTAATCAAGTTGTTTTTTTCCTATGAAGATGGTTGATTTTAGAATTGAATTGTTAATGTACCTCTGTACATTTTACTTAGAT
ENSMUSG00000041219	Arhgap11a	2849	25	109	100	AGTTGTTTTTTTCCTATGAAGATGGTTGATTTTAGAATTGAATTGTTAATGTACCTCTGTACATTTTACTTAGATAAATATCAGATAGTGTTATCATGTG
ENSMUSG00000041219	Arhgap11a	2849	25	110	100	TTGATTTTAGAATTGAATTGTTAATGTACCTCTGTACATTTTACTTAGATAAATATCAGATAGTGTTATCATGTGTTTAAATGTTATTTATTTAGCATAG
ENSMUSG00000041219	Arhgap11a	2849	25	111	99	GTACCTCTGTACATTTTACTTAGATAAATATCAGATAGTGTTATCATGTGTTTAAATGTTATTTATTTAGCATAGACATTAAAAATAGCTCCTGGGAAA
ENSMUSG00000041219	Arhgap11a	0	0	112	150	TAAAATTGCTGGGTCAGGTTGCAGAATGCTCAAGTGCTGGTGTGTAGATATGGCGGGCGGGCAGTTGCAGGATGCTTGTGTGCTGGTGTGTAGATATGGCGGGCGGGCAGTTGCAGGATGCTTGTGTGCTGGTGTGTAGATCGGGGTGCT
ENSMUSG00000006699	Cdc42_1	768	25	1	100	ACCGTTTTCTCCTTCCCCTCTTTGCTGCTGCTTCCTGTCCCACTACTGTAGAAAGATCATTTAAAACAAAGGAATAAAACCATCCTGTTTGAAAGCCTCT
ENSMUSG00000006699	Cdc42_1	768	25	2	100	TGCTGCTTCCTGTCCCACTACTGTAGAAAGATCATTTAAAACAAAGGAATAAAACCATCCTGTTTGAAAGCCTCTGCGTCTTCTTACTCAACACTTTAGA
ENSMUSG00000006699	Cdc42_1	768	25	3	100	GAAAGATCATTTAAAACAAAGGAATAAAACCATCCTGTTTGAAAGCCTCTGCGTCTTCTTACTCAACACTTTAGAGCAAACTCTGTATTCATTTTTGATC
ENSMUSG00000006699	Cdc42_1	768	25	4	100	AAAACCATCCTGTTTGAAAGCCTCTGCGTCTTCTTACTCAACACTTTAGAGCAAACTCTGTATTCATTTTTGATCATGAATGCAATTAGAATATTTTTTG
ENSMUSG00000006699	Cdc42_1	768	25	5	100	GCGTCTTCTTACTCAACACTTTAGAGCAAACTCTGTATTCATTTTTGATCATGAATGCAATTAGAATATTTTTTGTGATCAGTAGTCACGTTAGACTTGT
ENSMUSG00000006699	Cdc42_1	768	25	6	100	GCAAACTCTGTATTCATTTTTGATCATGAATGCAATTAGAATATTTTTTGTGATCAGTAGTCACGTTAGACTTGTTTAACTTTCTGCTGCTTGAGTTGCC
ENSMUSG00000006699	Cdc42_1	768	25	7	100	ATGAATGCAATTAGAATATTTTTTGTGATCAGTAGTCACGTTAGACTTGTTTAACTTTCTGCTGCTTGAGTTGCCTGATGCTCAGAGCTTTTGGTTTGAA
ENSMUSG00000006699	Cdc42_1	768	25	8	100	TGATCAGTAGTCACGTTAGACTTGTTTAACTTTCTGCTGCTTGAGTTGCCTGATGCTCAGAGCTTTTGGTTTGAATTATTGCAAAAGGGAATGTGGTCTG
ENSMUSG00000006699	Cdc42_1	768	25	9	100	TTAACTTTCTGCTGCTTGAGTTGCCTGATGCTCAGAGCTTTTGGTTTGAATTATTGCAAAAGGGAATGTGGTCTGGCATTAAGAATGATGTCTTCTTGGA
ENSMUSG00000006699	Cdc42_1	768	25	10	100	TGATGCTCAGAGCTTTTGGTTTGAATTATTGCAAAAGGGAATGTGGTCTGGCATTAAGAATGATGTCTTCTTGGAGAAAATAAGAGTTTTAACGCTTCTA
ENSMUSG00000006699	Cdc42_1	768	25	11	100	TTATTGCAAAAGGGAATGTGGTCTGGCATTAAGAATGATGTCTTCTTGGAGAAAATAAGAGTTTTAACGCTTCTAGATGTTAGTTCTAGATGGAGAAAGC
ENSMUSG00000006699	Cdc42_1	768	25	12	100	GCATTAAGAATGATGTCTTCTTGGAGAAAATAAGAGTTTTAACGCTTCTAGATGTTAGTTCTAGATGGAGAAAGCATCACTAAACATCATTTTACTCTTA
ENSMUSG00000006699	Cdc42_1	768	25	13	100	GAAAATAAGAGTTTTAACGCTTCTAGATGTTAGTTCTAGATGGAGAAAGCATCACTAAACATCATTTTACTCTTACTGATTGTTAATTGTAATTGCATGA
ENSMUSG00000006699	Cdc42_1	768	25	14	100	GATGTTAGTTCTAGATGGAGAAAGCATCACTAAACATCATTTTACTCTTACTGATTGTTAATTGTAATTGCATGACACACTATGAAAAGGGTTGGCTTGC
ENSMUSG00000006699	Cdc42_1	768	25	15	100	ATCACTAAACATCATTTTACTCTTACTGATTGTTAATTGTAATTGCATGACACACTATGAAAAGGGTTGGCTTGCTAGTAGAGTGTAATGGGGAAGGGAG
ENSMUSG00000006699	Cdc42_1	768	25	16	100	CTGATTGTTAATTGTAATTGCATGACACACTATGAAAAGGGTTGGCTTGCTAGTAGAGTGTAATGGGGAAGGGAGGATTCTCATGGTTTTCCTGTGTGCA
ENSMUSG00000006699	Cdc42_1	768	25	17	100	CACACTATGAAAAGGGTTGGCTTGCTAGTAGAGTGTAATGGGGAAGGGAGGATTCTCATGGTTTTCCTGTGTGCAGTGAAACTTTTGTGTTGCTCTTGCT
ENSMUSG00000006699	Cdc42_1	768	25	18	100	TAGTAGAGTGTAATGGGGAAGGGAGGATTCTCATGGTTTTCCTGTGTGCAGTGAAACTTTTGTGTTGCTCTTGCTTTGGCTGTTTGTGCCGTAGGTGGAG
ENSMUSG00000006699	Cdc42_1	768	25	19	100	GATTCTCATGGTTTTCCTGTGTGCAGTGAAACTTTTGTGTTGCTCTTGCTTTGGCTGTTTGTGCCGTAGGTGGAGTGTTTGTCATTCTGGGATGGGGAAG
ENSMUSG00000006699	Cdc42_1	768	25	20	100	GTGAAACTTTTGTGTTGCTCTTGCTTTGGCTGTTTGTGCCGTAGGTGGAGTGTTTGTCATTCTGGGATGGGGAAGGTATCCATGTATCTGCTTACTGCTT
ENSMUSG00000006699	Cdc42_1	768	25	21	100	TTGGCTGTTTGTGCCGTAGGTGGAGTGTTTGTCATTCTGGGATGGGGAAGGTATCCATGTATCTGCTTACTGCTTTATGAGTTCATTGTTACACATTATC
ENSMUSG00000006699	Cdc42_1	768	25	22	100	TGTTTGTCATTCTGGGATGGGGAAGGTATCCATGTATCTGCTTACTGCTTTATGAGTTCATTGTTACACATTATCTCCTAATCCTAGCATCCATTTAACA
ENSMUSG00000006699	Cdc42_1	768	25	23	100	GTATCCATGTATCTGCTTACTGCTTTATGAGTTCATTGTTACACATTATCTCCTAATCCTAGCATCCATTTAACAATTGACTTAAGATTTGCTGATATTG
ENSMUSG00000006699	Cdc42_1	768	25	24	100	TATGAGTTCATTGTTACACATTATCTCCTAATCCTAGCATCCATTTAACAATTGACTTAAGATTTGCTGATATTGAAATGTAAAGCTACTGCCTTTATAT
ENSMUSG00000006699	Cdc42_1	768	25	25	100	TCCTAATCCTAGCATCCATTTAACAATTGACTTAAGATTTGCTGATATTGAAATGTAAAGCTACTGCCTTTATATTTTCCTGCTTTTGATTCTATTGTTG
ENSMUSG00000006699	Cdc42_1	768	25	26	100	ATTGACTTAAGATTTGCTGATATTGAAATGTAAAGCTACTGCCTTTATATTTTCCTGCTTTTGATTCTATTGTTGTGAGGGAAACATACAGTTGTGGTTA
ENSMUSG00000006699	Cdc42_1	768	25	27	100	AAATGTAAAGCTACTGCCTTTATATTTTCCTGCTTTTGATTCTATTGTTGTGAGGGAAACATACAGTTGTGGTTATCTTTACATTTTGAAATTAAAAATA
ENSMUSG00000006699	Cdc42_1	768	25	28	93	TTTCCTGCTTTTGATTCTATTGTTGTGAGGGAAACATACAGTTGTGGTTATCTTTACATTTTGAAATTAAAAATATACAATTGTTTGTATAAA
ENSMUSG00000026031	Cflar_1	865	25	1	100	ACCAGTCTCAGAGATGTAATAAAAATAAACATCTCATTTCATATGCTGTAATAGCTAAACAAATTCTGATAGATATGTGTTTGATTAAGAATGTGTATAA
ENSMUSG00000026031	Cflar_1	865	25	2	100	TAAACATCTCATTTCATATGCTGTAATAGCTAAACAAATTCTGATAGATATGTGTTTGATTAAGAATGTGTATAATTTCTTATGATTATAAACCTTAGTA
ENSMUSG00000026031	Cflar_1	865	25	3	100	ATAGCTAAACAAATTCTGATAGATATGTGTTTGATTAAGAATGTGTATAATTTCTTATGATTATAAACCTTAGTAGTGTTCAAAAATATATTTGGAAAAA
ENSMUSG00000026031	Cflar_1	865	25	4	100	TGTGTTTGATTAAGAATGTGTATAATTTCTTATGATTATAAACCTTAGTAGTGTTCAAAAATATATTTGGAAAAATTTATGAAATATATAACAAGAAAAT
ENSMUSG00000026031	Cflar_1	865	25	5	100	TTTCTTATGATTATAAACCTTAGTAGTGTTCAAAAATATATTTGGAAAAATTTATGAAATATATAACAAGAAAATAATTTTTGTGCCCATTATCTGGGCA
ENSMUSG00000026031	Cflar_1	865	25	6	100	GTGTTCAAAAATATATTTGGAAAAATTTATGAAATATATAACAAGAAAATAATTTTTGTGCCCATTATCTGGGCATGACTACTGTGGAAAGCTTTCTTTT
ENSMUSG00000026031	Cflar_1	865	25	7	100	TTTATGAAATATATAACAAGAAAATAATTTTTGTGCCCATTATCTGGGCATGACTACTGTGGAAAGCTTTCTTTTAGTCTCTGTCCTATGTGCATTAGCA
ENSMUSG00000026031	Cflar_1	865	25	8	100	AATTTTTGTGCCCATTATCTGGGCATGACTACTGTGGAAAGCTTTCTTTTAGTCTCTGTCCTATGTGCATTAGCAAATGTGTCTATTTATACAGTTGAAT
ENSMUSG00000026031	Cflar_1	865	25	9	100	TGACTACTGTGGAAAGCTTTCTTTTAGTCTCTGTCCTATGTGCATTAGCAAATGTGTCTATTTATACAGTTGAATATCTTTTTCATTCTTTGTTTCTTTG
ENSMUSG00000026031	Cflar_1	865	25	10	100	AGTCTCTGTCCTATGTGCATTAGCAAATGTGTCTATTTATACAGTTGAATATCTTTTTCATTCTTTGTTTCTTTGAAGAGTCAATTTTAAAAATTAAAGT
ENSMUSG00000026031	Cflar_1	865	25	11	100	AATGTGTCTATTTATACAGTTGAATATCTTTTTCATTCTTTGTTTCTTTGAAGAGTCAATTTTAAAAATTAAAGTAGGTAGAATGTACCCATAGAAAGAA
ENSMUSG00000026031	Cflar_1	865	25	12	100	ATCTTTTTCATTCTTTGTTTCTTTGAAGAGTCAATTTTAAAAATTAAAGTAGGTAGAATGTACCCATAGAAAGAAAAAGTTAAATGTCCCCAAAGAGATT
ENSMUSG00000026031	Cflar_1	865	25	13	100	AAGAGTCAATTTTAAAAATTAAAGTAGGTAGAATGTACCCATAGAAAGAAAAAGTTAAATGTCCCCAAAGAGATTTTAAAGTTGTTTCCTTCTACCTCAC
ENSMUSG00000026031	Cflar_1	865	25	14	100	AGGTAGAATGTACCCATAGAAAGAAAAAGTTAAATGTCCCCAAAGAGATTTTAAAGTTGTTTCCTTCTACCTCACGGAACTCATGTCCTACCTCCTTCCT
ENSMUSG00000026031	Cflar_1	865	25	15	100	AAAGTTAAATGTCCCCAAAGAGATTTTAAAGTTGTTTCCTTCTACCTCACGGAACTCATGTCCTACCTCCTTCCTGTTAAGGAGACTAATCTAGACCAGT
ENSMUSG00000026031	Cflar_1	865	25	16	100	TTAAAGTTGTTTCCTTCTACCTCACGGAACTCATGTCCTACCTCCTTCCTGTTAAGGAGACTAATCTAGACCAGTTTCTTCTATAACCATGCACAGAGAA
ENSMUSG00000026031	Cflar_1	865	25	17	100	GGAACTCATGTCCTACCTCCTTCCTGTTAAGGAGACTAATCTAGACCAGTTTCTTCTATAACCATGCACAGAGAATCTACCCACAGAGTGTCTACTTTTA
ENSMUSG00000026031	Cflar_1	865	25	18	100	GTTAAGGAGACTAATCTAGACCAGTTTCTTCTATAACCATGCACAGAGAATCTACCCACAGAGTGTCTACTTTTATACAAGTGGTAGCATATCATGTCTG
ENSMUSG00000026031	Cflar_1	865	25	19	100	TTCTTCTATAACCATGCACAGAGAATCTACCCACAGAGTGTCTACTTTTATACAAGTGGTAGCATATCATGTCTGCTCTTCTGAACAGAGACTCCTTAGA
ENSMUSG00000026031	Cflar_1	865	25	20	100	TCTACCCACAGAGTGTCTACTTTTATACAAGTGGTAGCATATCATGTCTGCTCTTCTGAACAGAGACTCCTTAGATATTGTTCCATATAGTTAATAGGAG
ENSMUSG00000026031	Cflar_1	865	25	21	100	TACAAGTGGTAGCATATCATGTCTGCTCTTCTGAACAGAGACTCCTTAGATATTGTTCCATATAGTTAATAGGAGATTGTTTCGACTTAATTATTATTTG
ENSMUSG00000026031	Cflar_1	865	25	22	100	CTCTTCTGAACAGAGACTCCTTAGATATTGTTCCATATAGTTAATAGGAGATTGTTTCGACTTAATTATTATTTGTATTATTTTGAATGATACCCCTACC
ENSMUSG00000026031	Cflar_1	865	25	23	100	TATTGTTCCATATAGTTAATAGGAGATTGTTTCGACTTAATTATTATTTGTATTATTTTGAATGATACCCCTACCCTTTTATCTTCTTTTGAGACAAGAA
ENSMUSG00000026031	Cflar_1	865	25	24	100	ATTGTTTCGACTTAATTATTATTTGTATTATTTTGAATGATACCCCTACCCTTTTATCTTCTTTTGAGACAAGAACTTACCTGTAATCCAGCCTGGCCTG
ENSMUSG00000026031	Cflar_1	865	25	25	100	TATTATTTTGAATGATACCCCTACCCTTTTATCTTCTTTTGAGACAAGAACTTACCTGTAATCCAGCCTGGCCTGGAATCCATTATGTAACCTAGGCTGG
ENSMUSG00000026031	Cflar_1	865	25	26	100	CTTTTATCTTCTTTTGAGACAAGAACTTACCTGTAATCCAGCCTGGCCTGGAATCCATTATGTAACCTAGGCTGGCCTTGAACTTGCAATGAGCCTCCTC
ENSMUSG00000026031	Cflar_1	865	25	27	100	CTTACCTGTAATCCAGCCTGGCCTGGAATCCATTATGTAACCTAGGCTGGCCTTGAACTTGCAATGAGCCTCCTCTTGCTTCAGCCTCCTCGGGCTCATG
ENSMUSG00000026031	Cflar_1	865	25	28	100	GAATCCATTATGTAACCTAGGCTGGCCTTGAACTTGCAATGAGCCTCCTCTTGCTTCAGCCTCCTCGGGCTCATGGCTTCCATTTTCTGCATGTACTAAA
ENSMUSG00000026031	Cflar_1	865	25	29	100	CCTTGAACTTGCAATGAGCCTCCTCTTGCTTCAGCCTCCTCGGGCTCATGGCTTCCATTTTCTGCATGTACTAAAATGTATTTAGTTCTTTCTTGCTGAT
ENSMUSG00000026031	Cflar_1	865	25	30	100	TTGCTTCAGCCTCCTCGGGCTCATGGCTTCCATTTTCTGCATGTACTAAAATGTATTTAGTTCTTTCTTGCTGATGTATAAATTGCCTCCTTTCCTTTGT
ENSMUSG00000026031	Cflar_1	865	25	31	100	GCTTCCATTTTCTGCATGTACTAAAATGTATTTAGTTCTTTCTTGCTGATGTATAAATTGCCTCCTTTCCTTTGTTACTAGAAACAATGCTGCAAAATAA
ENSMUSG00000026031	Cflar_1	865	25	32	90	ATGTATTTAGTTCTTTCTTGCTGATGTATAAATTGCCTCCTTTCCTTTGTTACTAGAAACAATGCTGCAAAATAAACTTCCTGATTCTTA
ENSMUSG00000038690	Atp5j2	141	15	1	75	AGAGGGGTCGCTGGAGGGCATTGCATGGCCGAGCATAACTGCCCGCCCCACTCCGACCTAGGAAGAATTCAACTG
ENSMUSG00000038690	Atp5j2	141	15	2	75	GGGCATTGCATGGCCGAGCATAACTGCCCGCCCCACTCCGACCTAGGAAGAATTCAACTGGCTGAACCTTCATAC
ENSMUSG00000038690	Atp5j2	141	15	3	75	GAGCATAACTGCCCGCCCCACTCCGACCTAGGAAGAATTCAACTGGCTGAACCTTCATACCCTGACTGAGAACTA
ENSMUSG00000038690	Atp5j2	141	15	4	75	CCCCACTCCGACCTAGGAAGAATTCAACTGGCTGAACCTTCATACCCTGACTGAGAACTAGTGTCCAATAAAAGG
ENSMUSG00000038690	Atp5j2	141	15	5	75	GGAAGAATTCAACTGGCTGAACCTTCATACCCTGACTGAGAACTAGTGTCCAATAAAAGGTGACTGGTTCACATA
ENSMUSG00000038690	Atp5j2	141	15	6	66	GCTGAACCTTCATACCCTGACTGAGAACTAGTGTCCAATAAAAGGTGACTGGTTCACATACTGCTT
ENSMUSG00000047721	Bola2	404	15	1	75	GGGGCCTAGGCCTGAACAGTCATTAAAATTTAAACCTGGCCCAGCTGGTCTCAGTGTGCTGTTTGAAGACCCTGA
ENSMUSG00000047721	Bola2	404	15	2	75	ACAGTCATTAAAATTTAAACCTGGCCCAGCTGGTCTCAGTGTGCTGTTTGAAGACCCTGAGGCCAAGTCACGGAT
ENSMUSG00000047721	Bola2	404	15	3	75	TAAACCTGGCCCAGCTGGTCTCAGTGTGCTGTTTGAAGACCCTGAGGCCAAGTCACGGATGTGGCTTTTCCCTGA
ENSMUSG00000047721	Bola2	404	15	4	75	TGGTCTCAGTGTGCTGTTTGAAGACCCTGAGGCCAAGTCACGGATGTGGCTTTTCCCTGACTCTCCTCCAGCCAT
ENSMUSG00000047721	Bola2	404	15	5	75	GTTTGAAGACCCTGAGGCCAAGTCACGGATGTGGCTTTTCCCTGACTCTCCTCCAGCCATTGTTTCAGCAAATTT
ENSMUSG00000047721	Bola2	404	15	6	75	GGCCAAGTCACGGATGTGGCTTTTCCCTGACTCTCCTCCAGCCATTGTTTCAGCAAATTTGGATGGATTTCTTTC
ENSMUSG00000047721	Bola2	404	15	7	75	GTGGCTTTTCCCTGACTCTCCTCCAGCCATTGTTTCAGCAAATTTGGATGGATTTCTTTCCTGAGCCCTCTAGGT
ENSMUSG00000047721	Bola2	404	15	8	75	CTCTCCTCCAGCCATTGTTTCAGCAAATTTGGATGGATTTCTTTCCTGAGCCCTCTAGGTCCCAACTTAAACAAT
ENSMUSG00000047721	Bola2	404	15	9	75	TGTTTCAGCAAATTTGGATGGATTTCTTTCCTGAGCCCTCTAGGTCCCAACTTAAACAATGAAGATTCGGTTCTT
ENSMUSG00000047721	Bola2	404	15	10	75	GGATGGATTTCTTTCCTGAGCCCTCTAGGTCCCAACTTAAACAATGAAGATTCGGTTCTTAAGTCTGCCAAGGCT
ENSMUSG00000047721	Bola2	404	15	11	75	CTGAGCCCTCTAGGTCCCAACTTAAACAATGAAGATTCGGTTCTTAAGTCTGCCAAGGCTTTACTGTCAAACCCT
ENSMUSG00000047721	Bola2	404	15	12	75	CCCAACTTAAACAATGAAGATTCGGTTCTTAAGTCTGCCAAGGCTTTACTGTCAAACCCTGTGGTCTGTACTGTC
ENSMUSG00000047721	Bola2	404	15	13	75	GAAGATTCGGTTCTTAAGTCTGCCAAGGCTTTACTGTCAAACCCTGTGGTCTGTACTGTCACCAAGGTCAGACCT
ENSMUSG00000047721	Bola2	404	15	14	75	AAGTCTGCCAAGGCTTTACTGTCAAACCCTGTGGTCTGTACTGTCACCAAGGTCAGACCTCAAAAAGCAGGGTGT
ENSMUSG00000047721	Bola2	404	15	15	75	TTACTGTCAAACCCTGTGGTCTGTACTGTCACCAAGGTCAGACCTCAAAAAGCAGGGTGTTCCTGCTCTGTCAGC
ENSMUSG00000047721	Bola2	404	15	16	75	GTGGTCTGTACTGTCACCAAGGTCAGACCTCAAAAAGCAGGGTGTTCCTGCTCTGTCAGCCCTCAGAAACCCTGA
ENSMUSG00000047721	Bola2	404	15	17	75	ACCAAGGTCAGACCTCAAAAAGCAGGGTGTTCCTGCTCTGTCAGCCCTCAGAAACCCTGAGCATTCTCCCAGGTT
ENSMUSG00000047721	Bola2	404	15	18	75	CAAAAAGCAGGGTGTTCCTGCTCTGTCAGCCCTCAGAAACCCTGAGCATTCTCCCAGGTTCCCTCACTCCAGGTT
ENSMUSG00000047721	Bola2	404	15	19	75	TCCTGCTCTGTCAGCCCTCAGAAACCCTGAGCATTCTCCCAGGTTCCCTCACTCCAGGTTCCTGGAAGTAGCAGA
ENSMUSG00000047721	Bola2	404	15	20	75	CCTCAGAAACCCTGAGCATTCTCCCAGGTTCCCTCACTCCAGGTTCCTGGAAGTAGCAGAGACAAGATACAGAAT
ENSMUSG00000047721	Bola2	404	15	21	75	GCATTCTCCCAGGTTCCCTCACTCCAGGTTCCTGGAAGTAGCAGAGACAAGATACAGAATTTCTGTCAGTCTCTT
ENSMUSG00000047721	Bola2	404	15	22	75	CCCTCACTCCAGGTTCCTGGAAGTAGCAGAGACAAGATACAGAATTTCTGTCAGTCTCTTCACAGGCGTACACAC
ENSMUSG00000047721	Bola2	404	15	23	74	CCTGGAAGTAGCAGAGACAAGATACAGAATTTCTGTCAGTCTCTTCACAGGCGTACACACTCAGGAGGAGGGAT
ENSMUSG00000071528	Usmg5	105	15	1	75	ATGGATTTTGAAATGTCTGACCTCACCTGTTAAGTCCCATGCCTGAAGAAGCTGATGTGAACTCATCATGTAATA
ENSMUSG00000071528	Usmg5	105	15	2	75	TCTGACCTCACCTGTTAAGTCCCATGCCTGAAGAAGCTGATGTGAACTCATCATGTAATACTCAATTTGTACAAT
ENSMUSG00000071528	Usmg5	105	15	3	75	TAAGTCCCATGCCTGAAGAAGCTGATGTGAACTCATCATGTAATACTCAATTTGTACAATAAATTATGAACCTGG
ENSMUSG00000001289	Pfdn5	524	25	1	100	GAGTGCACTGCAGAAATGAAGCAGAGTGAGGGACCCTTCTTCAAGGGGCCTGGGACTTTTTCCGGCAATGGCCTCCTGGGAAAGTGGCCTGGGAAGAGAG
ENSMUSG00000001289	Pfdn5	524	25	2	100	GTGAGGGACCCTTCTTCAAGGGGCCTGGGACTTTTTCCGGCAATGGCCTCCTGGGAAAGTGGCCTGGGAAGAGAGTGTTTTGTGTTTAATGTTAATAAAT
ENSMUSG00000001289	Pfdn5	524	25	3	100	TGGGACTTTTTCCGGCAATGGCCTCCTGGGAAAGTGGCCTGGGAAGAGAGTGTTTTGTGTTTAATGTTAATAAATGTGACCGCTGCGCAAATGGGGTGGT
ENSMUSG00000001289	Pfdn5	524	25	4	100	CTGGGAAAGTGGCCTGGGAAGAGAGTGTTTTGTGTTTAATGTTAATAAATGTGACCGCTGCGCAAATGGGGTGGTCTATTCTTGCATTAAACAAGGGCCT
ENSMUSG00000001289	Pfdn5	524	25	5	100	TGTTTTGTGTTTAATGTTAATAAATGTGACCGCTGCGCAAATGGGGTGGTCTATTCTTGCATTAAACAAGGGCCTGGTGCTGAACTGGGAGTGCCCAGGA
ENSMUSG00000001289	Pfdn5	524	25	6	100	GTGACCGCTGCGCAAATGGGGTGGTCTATTCTTGCATTAAACAAGGGCCTGGTGCTGAACTGGGAGTGCCCAGGAGGTGTACTTTTGCCAAGAGCCCCCT
ENSMUSG00000001289	Pfdn5	524	25	7	100	CTATTCTTGCATTAAACAAGGGCCTGGTGCTGAACTGGGAGTGCCCAGGAGGTGTACTTTTGCCAAGAGCCCCCTAGCCACACGGCCTTATAGAGGTTCC
ENSMUSG00000001289	Pfdn5	524	25	8	100	GGTGCTGAACTGGGAGTGCCCAGGAGGTGTACTTTTGCCAAGAGCCCCCTAGCCACACGGCCTTATAGAGGTTCCAACCAGAGGTTTGGGGACCTGTAAA
ENSMUSG00000001289	Pfdn5	524	25	9	100	GGTGTACTTTTGCCAAGAGCCCCCTAGCCACACGGCCTTATAGAGGTTCCAACCAGAGGTTTGGGGACCTGTAAAAAGGTTTTGCGCTAAGTAGTGCACA
ENSMUSG00000001289	Pfdn5	524	25	10	100	AGCCACACGGCCTTATAGAGGTTCCAACCAGAGGTTTGGGGACCTGTAAAAAGGTTTTGCGCTAAGTAGTGCACAGTGTTGTTGCCATGGGGACGGATGG
ENSMUSG00000001289	Pfdn5	524	25	11	100	AACCAGAGGTTTGGGGACCTGTAAAAAGGTTTTGCGCTAAGTAGTGCACAGTGTTGTTGCCATGGGGACGGATGGCGGGCGGAAGTGAAGCTGTGCCTGA
ENSMUSG00000001289	Pfdn5	524	25	12	100	AAGGTTTTGCGCTAAGTAGTGCACAGTGTTGTTGCCATGGGGACGGATGGCGGGCGGAAGTGAAGCTGTGCCTGACACTTCCTCTTCCGGGTCGACCTTC
ENSMUSG00000001289	Pfdn5	524	25	13	100	GTGTTGTTGCCATGGGGACGGATGGCGGGCGGAAGTGAAGCTGTGCCTGACACTTCCTCTTCCGGGTCGACCTTCCCTTGGAGGGAACTATATGGGTAGA
ENSMUSG00000001289	Pfdn5	524	25	14	100	CGGGCGGAAGTGAAGCTGTGCCTGACACTTCCTCTTCCGGGTCGACCTTCCCTTGGAGGGAACTATATGGGTAGACGTTTCCTGCGTGGTATCTTAACAT
ENSMUSG00000001289	Pfdn5	524	25	15	100	CACTTCCTCTTCCGGGTCGACCTTCCCTTGGAGGGAACTATATGGGTAGACGTTTCCTGCGTGGTATCTTAACATTGCCGCTCCGGTCAGTTCTCCAAGC
ENSMUSG00000001289	Pfdn5	524	25	16	100	CCTTGGAGGGAACTATATGGGTAGACGTTTCCTGCGTGGTATCTTAACATTGCCGCTCCGGTCAGTTCTCCAAGCCCAGCACCGCATGCTTGGCTCAGAG
ENSMUSG00000001289	Pfdn5	524	25	17	100	CGTTTCCTGCGTGGTATCTTAACATTGCCGCTCCGGTCAGTTCTCCAAGCCCAGCACCGCATGCTTGGCTCAGAGCAGGATCCGCCCGCTAAAAGACCTC
ENSMUSG00000001289	Pfdn5	524	25	18	99	TGCCGCTCCGGTCAGTTCTCCAAGCCCAGCACCGCATGCTTGGCTCAGAGCAGGATCCGCCCGCTAAAAGACCTCGCAACAACCTCATGGCACCGCCCC
ENSMUSG00000004945	Tmem242	499	15	1	75	CACAGCACGGGCGACTCCGGAGCAACGGCTGCAGGAATGGCAGCTTTGGAAACACCATGTCTGAGAAAGACTGGG
ENSMUSG00000004945	Tmem242	499	15	2	75	TCCGGAGCAACGGCTGCAGGAATGGCAGCTTTGGAAACACCATGTCTGAGAAAGACTGGGGCGACTCCTCTCTAG
ENSMUSG00000004945	Tmem242	499	15	3	75	GCAGGAATGGCAGCTTTGGAAACACCATGTCTGAGAAAGACTGGGGCGACTCCTCTCTAGGAACACGTGCCGATG
ENSMUSG00000004945	Tmem242	499	15	4	75	TTGGAAACACCATGTCTGAGAAAGACTGGGGCGACTCCTCTCTAGGAACACGTGCCGATGGCCGGCAAACCCAGA
ENSMUSG00000004945	Tmem242	499	15	5	75	CTGAGAAAGACTGGGGCGACTCCTCTCTAGGAACACGTGCCGATGGCCGGCAAACCCAGAGGCCACAGCATCGCC
ENSMUSG00000004945	Tmem242	499	15	6	75	GCGACTCCTCTCTAGGAACACGTGCCGATGGCCGGCAAACCCAGAGGCCACAGCATCGCCGTGGCTGTGGCTGTG
ENSMUSG00000004945	Tmem242	499	15	7	75	GAACACGTGCCGATGGCCGGCAAACCCAGAGGCCACAGCATCGCCGTGGCTGTGGCTGTGGCACACGGTCGGAAT
ENSMUSG00000004945	Tmem242	499	15	8	75	GCCGGCAAACCCAGAGGCCACAGCATCGCCGTGGCTGTGGCTGTGGCACACGGTCGGAATGTTTTCCTAAAGCTA
ENSMUSG00000004945	Tmem242	499	15	9	75	GGCCACAGCATCGCCGTGGCTGTGGCTGTGGCACACGGTCGGAATGTTTTCCTAAAGCTAAGACAACAATTGAAT
ENSMUSG00000004945	Tmem242	499	15	10	75	GTGGCTGTGGCTGTGGCACACGGTCGGAATGTTTTCCTAAAGCTAAGACAACAATTGAATTACCTAGAAGTTCTC
ENSMUSG00000004945	Tmem242	499	15	11	75	GCACACGGTCGGAATGTTTTCCTAAAGCTAAGACAACAATTGAATTACCTAGAAGTTCTCAGAAGGGACCTGGAG
ENSMUSG00000004945	Tmem242	499	15	12	75	GTTTTCCTAAAGCTAAGACAACAATTGAATTACCTAGAAGTTCTCAGAAGGGACCTGGAGGAAATGTTGTTGTTT
ENSMUSG00000004945	Tmem242	499	15	13	75	AGACAACAATTGAATTACCTAGAAGTTCTCAGAAGGGACCTGGAGGAAATGTTGTTGTTTAGAACAATAAACCAT
ENSMUSG00000004945	Tmem242	499	15	14	75	TACCTAGAAGTTCTCAGAAGGGACCTGGAGGAAATGTTGTTGTTTAGAACAATAAACCATGTTTCATAGTCACAA
ENSMUSG00000004945	Tmem242	499	15	15	75	AGAAGGGACCTGGAGGAAATGTTGTTGTTTAGAACAATAAACCATGTTTCATAGTCACAAAAGTCGGGGGGGGGG
ENSMUSG00000004945	Tmem242	499	15	16	75	GAAATGTTGTTGTTTAGAACAATAAACCATGTTTCATAGTCACAAAAGTCGGGGGGGGGGGGGGGGCTGGAGAGA
ENSMUSG00000004945	Tmem242	499	15	17	75	AGAACAATAAACCATGTTTCATAGTCACAAAAGTCGGGGGGGGGGGGGGGGCTGGAGAGATTCCCCATGGCTAAG
ENSMUSG00000004945	Tmem242	499	15	18	75	GTTTCATAGTCACAAAAGTCGGGGGGGGGGGGGGGGCTGGAGAGATTCCCCATGGCTAAGATCTCACACTGCTCT
ENSMUSG00000004945	Tmem242	499	15	19	75	AAGTCGGGGGGGGGGGGGGGGCTGGAGAGATTCCCCATGGCTAAGATCTCACACTGCTCTCGAGAGGACCTCAGT
ENSMUSG00000004945	Tmem242	499	15	20	75	GGGGGGCTGGAGAGATTCCCCATGGCTAAGATCTCACACTGCTCTCGAGAGGACCTCAGTTCGTTTTCCAGCCCC
ENSMUSG00000004945	Tmem242	499	15	21	75	TTCCCCATGGCTAAGATCTCACACTGCTCTCGAGAGGACCTCAGTTCGTTTTCCAGCCCCGTCCCTCTTTTGGGT
ENSMUSG00000004945	Tmem242	499	15	22	75	ATCTCACACTGCTCTCGAGAGGACCTCAGTTCGTTTTCCAGCCCCGTCCCTCTTTTGGGTGCCTCACCACCATCT
ENSMUSG00000004945	Tmem242	499	15	23	75	CGAGAGGACCTCAGTTCGTTTTCCAGCCCCGTCCCTCTTTTGGGTGCCTCACCACCATCTGTGCCATCAGGCTCC
ENSMUSG00000004945	Tmem242	499	15	24	75	TCGTTTTCCAGCCCCGTCCCTCTTTTGGGTGCCTCACCACCATCTGTGCCATCAGGCTCCAGGGGAATCTGAAGT
ENSMUSG00000004945	Tmem242	499	15	25	75	GTCCCTCTTTTGGGTGCCTCACCACCATCTGTGCCATCAGGCTCCAGGGGAATCTGAAGTCTTGCCTGGAATATG
ENSMUSG00000004945	Tmem242	499	15	26	75	GCCTCACCACCATCTGTGCCATCAGGCTCCAGGGGAATCTGAAGTCTTGCCTGGAATATGTGCGCACCTGCCCTC
ENSMUSG00000004945	Tmem242	499	15	27	75	GTGCCATCAGGCTCCAGGGGAATCTGAAGTCTTGCCTGGAATATGTGCGCACCTGCCCTCACGTGTATCTACAGC
ENSMUSG00000004945	Tmem242	499	15	28	75	AGGGGAATCTGAAGTCTTGCCTGGAATATGTGCGCACCTGCCCTCACGTGTATCTACAGCCACAAAAGTATATAC
ENSMUSG00000004945	Tmem242	499	15	29	79	CTTGCCTGGAATATGTGCGCACCTGCCCTCACGTGTATCTACAGCCACAAAAGTATATACAATTAAAAACTGAGAAGTC
ENSMUSG00000006699	Cdc42_2	1407	25	1	100	ACGCATCTCCAGAGCCCTTTCTGCACAGCTGGTGTTGTCGTCATACTAAAAGCAATGTTTAAATCAAACTAAAGATTAAAAATTAAAATTTGTTTCTGCA
ENSMUSG00000006699	Cdc42_2	1407	25	2	100	CAGCTGGTGTTGTCGTCATACTAAAAGCAATGTTTAAATCAAACTAAAGATTAAAAATTAAAATTTGTTTCTGCAATAATGACAAACGCCCTGCACCTAC
ENSMUSG00000006699	Cdc42_2	1407	25	3	100	AGCAATGTTTAAATCAAACTAAAGATTAAAAATTAAAATTTGTTTCTGCAATAATGACAAACGCCCTGCACCTACCCACATGCACTCATGTGAGACAAGG
ENSMUSG00000006699	Cdc42_2	1407	25	4	100	TTAAAAATTAAAATTTGTTTCTGCAATAATGACAAACGCCCTGCACCTACCCACATGCACTCATGTGAGACAAGGCCCATTAGTATGGCCCCTCCTTGCC
ENSMUSG00000006699	Cdc42_2	1407	25	5	100	ATAATGACAAACGCCCTGCACCTACCCACATGCACTCATGTGAGACAAGGCCCATTAGTATGGCCCCTCCTTGCCCTTCCAGTAATAGTTAATTTTGAAT
ENSMUSG00000006699	Cdc42_2	1407	25	6	100	CCACATGCACTCATGTGAGACAAGGCCCATTAGTATGGCCCCTCCTTGCCCTTCCAGTAATAGTTAATTTTGAATAATTATGTATTGTCTGAAAAGCAAT
ENSMUSG00000006699	Cdc42_2	1407	25	7	100	CCCATTAGTATGGCCCCTCCTTGCCCTTCCAGTAATAGTTAATTTTGAATAATTATGTATTGTCTGAAAAGCAATGAGTGCTAGTTTTTGTTTTCTTTGT
ENSMUSG00000006699	Cdc42_2	1407	25	8	100	CTTCCAGTAATAGTTAATTTTGAATAATTATGTATTGTCTGAAAAGCAATGAGTGCTAGTTTTTGTTTTCTTTGTTTAAAAAAAAAAACAAAAATCCCCA
ENSMUSG00000006699	Cdc42_2	1407	25	9	100	AATTATGTATTGTCTGAAAAGCAATGAGTGCTAGTTTTTGTTTTCTTTGTTTAAAAAAAAAAACAAAAATCCCCACAAACGTTTGTTGTTTTTTTGTTTA
ENSMUSG00000006699	Cdc42_2	1407	25	10	100	GAGTGCTAGTTTTTGTTTTCTTTGTTTAAAAAAAAAAACAAAAATCCCCACAAACGTTTGTTGTTTTTTTGTTTAAAAGCAAGCATGCTTGTATTGACTG
ENSMUSG00000006699	Cdc42_2	1407	25	11	100	TTAAAAAAAAAAACAAAAATCCCCACAAACGTTTGTTGTTTTTTTGTTTAAAAGCAAGCATGCTTGTATTGACTGTAACAGACTAATTCAGATTGTCAAA
ENSMUSG00000006699	Cdc42_2	1407	25	12	100	CAAACGTTTGTTGTTTTTTTGTTTAAAAGCAAGCATGCTTGTATTGACTGTAACAGACTAATTCAGATTGTCAAAGCTGCTCCCTGGTTCCATTTTGGAG
ENSMUSG00000006699	Cdc42_2	1407	25	13	100	AAAGCAAGCATGCTTGTATTGACTGTAACAGACTAATTCAGATTGTCAAAGCTGCTCCCTGGTTCCATTTTGGAGAGTAATCTGGGGCATCTTCGTGTCT
ENSMUSG00000006699	Cdc42_2	1407	25	14	100	TAACAGACTAATTCAGATTGTCAAAGCTGCTCCCTGGTTCCATTTTGGAGAGTAATCTGGGGCATCTTCGTGTCTTCTGTTTTGTTTTGTTTTGTTTTTC
ENSMUSG00000006699	Cdc42_2	1407	25	15	100	GCTGCTCCCTGGTTCCATTTTGGAGAGTAATCTGGGGCATCTTCGTGTCTTCTGTTTTGTTTTGTTTTGTTTTTCCTCAACCCTTCTCTCCTTTTGGGGT
ENSMUSG00000006699	Cdc42_2	1407	25	16	100	AGTAATCTGGGGCATCTTCGTGTCTTCTGTTTTGTTTTGTTTTGTTTTTCCTCAACCCTTCTCTCCTTTTGGGGTGTGTATGGGGTTGTTTCTTAGACTT
ENSMUSG00000006699	Cdc42_2	1407	25	17	100	TCTGTTTTGTTTTGTTTTGTTTTTCCTCAACCCTTCTCTCCTTTTGGGGTGTGTATGGGGTTGTTTCTTAGACTTGTATTTTAAAATTTGTTAACCATAG
ENSMUSG00000006699	Cdc42_2	1407	25	18	100	CTCAACCCTTCTCTCCTTTTGGGGTGTGTATGGGGTTGTTTCTTAGACTTGTATTTTAAAATTTGTTAACCATAGGACAGCCTGTGGGGAGGAGGACAGA
ENSMUSG00000006699	Cdc42_2	1407	25	19	100	GTGTATGGGGTTGTTTCTTAGACTTGTATTTTAAAATTTGTTAACCATAGGACAGCCTGTGGGGAGGAGGACAGAGTATTTCCACATTCCACTCCCTAGG
ENSMUSG00000006699	Cdc42_2	1407	25	20	100	GTATTTTAAAATTTGTTAACCATAGGACAGCCTGTGGGGAGGAGGACAGAGTATTTCCACATTCCACTCCCTAGGTCTAGTTTAGCAAACGTGTCCCCAC
ENSMUSG00000006699	Cdc42_2	1407	25	21	100	GACAGCCTGTGGGGAGGAGGACAGAGTATTTCCACATTCCACTCCCTAGGTCTAGTTTAGCAAACGTGTCCCCACCTGGTGCTCTTAGGAAGGAGTATAG
ENSMUSG00000006699	Cdc42_2	1407	25	22	100	GTATTTCCACATTCCACTCCCTAGGTCTAGTTTAGCAAACGTGTCCCCACCTGGTGCTCTTAGGAAGGAGTATAGAAACGCCTCGATTAACAACGTATTC
ENSMUSG00000006699	Cdc42_2	1407	25	23	100	TCTAGTTTAGCAAACGTGTCCCCACCTGGTGCTCTTAGGAAGGAGTATAGAAACGCCTCGATTAACAACGTATTCCTTCTTGAAAGTTGCCTTTTCTCTC
ENSMUSG00000006699	Cdc42_2	1407	25	24	100	CTGGTGCTCTTAGGAAGGAGTATAGAAACGCCTCGATTAACAACGTATTCCTTCTTGAAAGTTGCCTTTTCTCTCCACCTCTGAGTGGGTCCAGTCTGTG
ENSMUSG00000006699	Cdc42_2	1407	25	25	100	AAACGCCTCGATTAACAACGTATTCCTTCTTGAAAGTTGCCTTTTCTCTCCACCTCTGAGTGGGTCCAGTCTGTGATGGAACTCATGAAGGTGGGTGGAC
ENSMUSG00000006699	Cdc42_2	1407	25	26	100	CTTCTTGAAAGTTGCCTTTTCTCTCCACCTCTGAGTGGGTCCAGTCTGTGATGGAACTCATGAAGGTGGGTGGACGCTGTCTCGCCCCTCTTTCTAGGAT
ENSMUSG00000006699	Cdc42_2	1407	25	27	100	CACCTCTGAGTGGGTCCAGTCTGTGATGGAACTCATGAAGGTGGGTGGACGCTGTCTCGCCCCTCTTTCTAGGATGCACTCTATATGTGACTGTGACTTT
ENSMUSG00000006699	Cdc42_2	1407	25	28	100	ATGGAACTCATGAAGGTGGGTGGACGCTGTCTCGCCCCTCTTTCTAGGATGCACTCTATATGTGACTGTGACTTTCAAGGGTATTTGTTTGCCATTTCCT
ENSMUSG00000006699	Cdc42_2	1407	25	29	100	GCTGTCTCGCCCCTCTTTCTAGGATGCACTCTATATGTGACTGTGACTTTCAAGGGTATTTGTTTGCCATTTCCTGATTTAGGGAGGGGAATAATTTCTA
ENSMUSG00000006699	Cdc42_2	1407	25	30	100	GCACTCTATATGTGACTGTGACTTTCAAGGGTATTTGTTTGCCATTTCCTGATTTAGGGAGGGGAATAATTTCTAACTTCTTTCATTGATAAATGAAAAG
ENSMUSG00000006699	Cdc42_2	1407	25	31	100	CAAGGGTATTTGTTTGCCATTTCCTGATTTAGGGAGGGGAATAATTTCTAACTTCTTTCATTGATAAATGAAAAGTATTGCACCTTTGAAATACACCAAA
ENSMUSG00000006699	Cdc42_2	1407	25	32	100	GATTTAGGGAGGGGAATAATTTCTAACTTCTTTCATTGATAAATGAAAAGTATTGCACCTTTGAAATACACCAAATGGATTGAGTTCCTAATTAAAAAAA
ENSMUSG00000006699	Cdc42_2	1407	25	33	100	ACTTCTTTCATTGATAAATGAAAAGTATTGCACCTTTGAAATACACCAAATGGATTGAGTTCCTAATTAAAAAAAGTTCTTTTGCCCCTGTCAGTCATTT
ENSMUSG00000006699	Cdc42_2	1407	25	34	100	TATTGCACCTTTGAAATACACCAAATGGATTGAGTTCCTAATTAAAAAAAGTTCTTTTGCCCCTGTCAGTCATTTTCTTACATGCTTAGCACAGATTCAC
ENSMUSG00000006699	Cdc42_2	1407	25	35	100	TGGATTGAGTTCCTAATTAAAAAAAGTTCTTTTGCCCCTGTCAGTCATTTTCTTACATGCTTAGCACAGATTCACAACTCACTGTGTAGTGTTCCTAGAT
ENSMUSG00000006699	Cdc42_2	1407	25	36	100	GTTCTTTTGCCCCTGTCAGTCATTTTCTTACATGCTTAGCACAGATTCACAACTCACTGTGTAGTGTTCCTAGATTCAGCTGAAGACCTGGTACCTAGGG
ENSMUSG00000006699	Cdc42_2	1407	25	37	100	TCTTACATGCTTAGCACAGATTCACAACTCACTGTGTAGTGTTCCTAGATTCAGCTGAAGACCTGGTACCTAGGGTTCCTAACGGGATGGTGTTAGGAAA
ENSMUSG00000006699	Cdc42_2	1407	25	38	100	AACTCACTGTGTAGTGTTCCTAGATTCAGCTGAAGACCTGGTACCTAGGGTTCCTAACGGGATGGTGTTAGGAAACACATCATGGCTGATGATTGCCATC
ENSMUSG00000006699	Cdc42_2	1407	25	39	100	TCAGCTGAAGACCTGGTACCTAGGGTTCCTAACGGGATGGTGTTAGGAAACACATCATGGCTGATGATTGCCATCTCCTTTCAGGTGATGAGGTCACAGG
ENSMUSG00000006699	Cdc42_2	1407	25	40	100	TTCCTAACGGGATGGTGTTAGGAAACACATCATGGCTGATGATTGCCATCTCCTTTCAGGTGATGAGGTCACAGGCCTGCTTCCTTAAGAAGCTATGAGC
ENSMUSG00000006699	Cdc42_2	1407	25	41	100	CACATCATGGCTGATGATTGCCATCTCCTTTCAGGTGATGAGGTCACAGGCCTGCTTCCTTAAGAAGCTATGAGCATGGGGTGGGGAGCATACTTTTAAC
ENSMUSG00000006699	Cdc42_2	1407	25	42	100	TCCTTTCAGGTGATGAGGTCACAGGCCTGCTTCCTTAAGAAGCTATGAGCATGGGGTGGGGAGCATACTTTTAACCAACATGGGGACCAGTCAGGGCTAT
ENSMUSG00000006699	Cdc42_2	1407	25	43	100	CCTGCTTCCTTAAGAAGCTATGAGCATGGGGTGGGGAGCATACTTTTAACCAACATGGGGACCAGTCAGGGCTATCCCCTTTTTTCTTCCATGCCTATGA
ENSMUSG00000006699	Cdc42_2	1407	25	44	100	ATGGGGTGGGGAGCATACTTTTAACCAACATGGGGACCAGTCAGGGCTATCCCCTTTTTTCTTCCATGCCTATGAGGAACCTTTGAACAACTGGCTGAAG
ENSMUSG00000006699	Cdc42_2	1407	25	45	100	CAACATGGGGACCAGTCAGGGCTATCCCCTTTTTTCTTCCATGCCTATGAGGAACCTTTGAACAACTGGCTGAAGCTTTCGCAAGAAAAATGGCGAGAGC
ENSMUSG00000006699	Cdc42_2	1407	25	46	100	CCCCTTTTTTCTTCCATGCCTATGAGGAACCTTTGAACAACTGGCTGAAGCTTTCGCAAGAAAAATGGCGAGAGCCTCATGATTCTTTATAAGTGTTAAT
ENSMUSG00000006699	Cdc42_2	1407	25	47	100	GGAACCTTTGAACAACTGGCTGAAGCTTTCGCAAGAAAAATGGCGAGAGCCTCATGATTCTTTATAAGTGTTAATAGAGACTTTATCAGATTATTTTGTT
ENSMUSG00000006699	Cdc42_2	1407	25	48	100	CTTTCGCAAGAAAAATGGCGAGAGCCTCATGATTCTTTATAAGTGTTAATAGAGACTTTATCAGATTATTTTGTTTGCAGGTTCCAGTTTTTAAAAAATG
ENSMUSG00000006699	Cdc42_2	1407	25	49	100	CTCATGATTCTTTATAAGTGTTAATAGAGACTTTATCAGATTATTTTGTTTGCAGGTTCCAGTTTTTAAAAAATGTTTAGATAATCTCCTTCCCCAGTCC
ENSMUSG00000006699	Cdc42_2	1407	25	50	100	AGAGACTTTATCAGATTATTTTGTTTGCAGGTTCCAGTTTTTAAAAAATGTTTAGATAATCTCCTTCCCCAGTCCTGATCTTGTGGATTCGTTAGTGCCG
ENSMUSG00000006699	Cdc42_2	1407	25	51	100	TGCAGGTTCCAGTTTTTAAAAAATGTTTAGATAATCTCCTTCCCCAGTCCTGATCTTGTGGATTCGTTAGTGCCGAACCAATGCTTTCTTGTGTCTCAAC
ENSMUSG00000006699	Cdc42_2	1407	25	52	100	TTTAGATAATCTCCTTCCCCAGTCCTGATCTTGTGGATTCGTTAGTGCCGAACCAATGCTTTCTTGTGTCTCAACTCTTTGTATATGAATTCTTTTCAGA
ENSMUSG00000006699	Cdc42_2	1407	25	53	107	TGATCTTGTGGATTCGTTAGTGCCGAACCAATGCTTTCTTGTGTCTCAACTCTTTGTATATGAATTCTTTTCAGATGTATTAAACAAACAAAACCCTTCACAAGTGA
ENSMUSG00000007950	Abhd8	478	15	1	75	CCAGCGGCGCAGGGACTCCTGGATCTTGAGTAGTAGAGGCTCTTAGACTGGGCGTGGGCTGGCTGGGCGGGGCCT
ENSMUSG00000007950	Abhd8	478	15	2	75	CTCCTGGATCTTGAGTAGTAGAGGCTCTTAGACTGGGCGTGGGCTGGCTGGGCGGGGCCTCATGCCGATGGGCGG
ENSMUSG00000007950	Abhd8	478	15	3	75	TAGTAGAGGCTCTTAGACTGGGCGTGGGCTGGCTGGGCGGGGCCTCATGCCGATGGGCGGGGCCTGGGCATGCCC
ENSMUSG00000007950	Abhd8	478	15	4	75	GACTGGGCGTGGGCTGGCTGGGCGGGGCCTCATGCCGATGGGCGGGGCCTGGGCATGCCCCAGAGCGAACCAGGC
ENSMUSG00000007950	Abhd8	478	15	5	75	GGCTGGGCGGGGCCTCATGCCGATGGGCGGGGCCTGGGCATGCCCCAGAGCGAACCAGGCACAGTCAGTGTTGGA
ENSMUSG00000007950	Abhd8	478	15	6	75	CATGCCGATGGGCGGGGCCTGGGCATGCCCCAGAGCGAACCAGGCACAGTCAGTGTTGGAGACTCAGTGCCCAGG
ENSMUSG00000007950	Abhd8	478	15	7	75	GGCCTGGGCATGCCCCAGAGCGAACCAGGCACAGTCAGTGTTGGAGACTCAGTGCCCAGGGCAGCTATGGTGCCC
ENSMUSG00000007950	Abhd8	478	15	8	75	CAGAGCGAACCAGGCACAGTCAGTGTTGGAGACTCAGTGCCCAGGGCAGCTATGGTGCCCTTTCCACGCGCGACC
ENSMUSG00000007950	Abhd8	478	15	9	75	ACAGTCAGTGTTGGAGACTCAGTGCCCAGGGCAGCTATGGTGCCCTTTCCACGCGCGACCGAAGGGTGTGACCTT
ENSMUSG00000007950	Abhd8	478	15	10	75	GACTCAGTGCCCAGGGCAGCTATGGTGCCCTTTCCACGCGCGACCGAAGGGTGTGACCTTGTACAGAGCCCCCTC
ENSMUSG00000007950	Abhd8	478	15	11	75	GCAGCTATGGTGCCCTTTCCACGCGCGACCGAAGGGTGTGACCTTGTACAGAGCCCCCTCCCTGCCTCCCCGAGT
ENSMUSG00000007950	Abhd8	478	15	12	75	TTTCCACGCGCGACCGAAGGGTGTGACCTTGTACAGAGCCCCCTCCCTGCCTCCCCGAGTCCCTGAAGCTGCAGC
ENSMUSG00000007950	Abhd8	478	15	13	75	GAAGGGTGTGACCTTGTACAGAGCCCCCTCCCTGCCTCCCCGAGTCCCTGAAGCTGCAGCGCGCGGGCTGCCATC
ENSMUSG00000007950	Abhd8	478	15	14	75	GTACAGAGCCCCCTCCCTGCCTCCCCGAGTCCCTGAAGCTGCAGCGCGCGGGCTGCCATCCCACTCGGTCTTCCC
ENSMUSG00000007950	Abhd8	478	15	15	75	CCTGCCTCCCCGAGTCCCTGAAGCTGCAGCGCGCGGGCTGCCATCCCACTCGGTCTTCCCCTCCGCTGTGCTCCA
ENSMUSG00000007950	Abhd8	478	15	16	75	CCCTGAAGCTGCAGCGCGCGGGCTGCCATCCCACTCGGTCTTCCCCTCCGCTGTGCTCCATTCCGCACTGGGAAG
ENSMUSG00000007950	Abhd8	478	15	17	75	GCGCGGGCTGCCATCCCACTCGGTCTTCCCCTCCGCTGTGCTCCATTCCGCACTGGGAAGCCCTAAGGAGAATCC
ENSMUSG00000007950	Abhd8	478	15	18	75	CCACTCGGTCTTCCCCTCCGCTGTGCTCCATTCCGCACTGGGAAGCCCTAAGGAGAATCCTGGGGAAGGGCTCCT
ENSMUSG00000007950	Abhd8	478	15	19	75	CTCCGCTGTGCTCCATTCCGCACTGGGAAGCCCTAAGGAGAATCCTGGGGAAGGGCTCCTATCCTGTCCTGGGAG
ENSMUSG00000007950	Abhd8	478	15	20	75	TTCCGCACTGGGAAGCCCTAAGGAGAATCCTGGGGAAGGGCTCCTATCCTGTCCTGGGAGACCCTACCGCGCCAT
ENSMUSG00000007950	Abhd8	478	15	21	75	CCCTAAGGAGAATCCTGGGGAAGGGCTCCTATCCTGTCCTGGGAGACCCTACCGCGCCATCCCCATTGCTTGGGA
ENSMUSG00000007950	Abhd8	478	15	22	75	TGGGGAAGGGCTCCTATCCTGTCCTGGGAGACCCTACCGCGCCATCCCCATTGCTTGGGACTGGGAGCTAGGCAC
ENSMUSG00000007950	Abhd8	478	15	23	75	ATCCTGTCCTGGGAGACCCTACCGCGCCATCCCCATTGCTTGGGACTGGGAGCTAGGCACCCAAGGAGGGAGGGG
ENSMUSG00000007950	Abhd8	478	15	24	75	ACCCTACCGCGCCATCCCCATTGCTTGGGACTGGGAGCTAGGCACCCAAGGAGGGAGGGGTCGGAGCCACAAATC
ENSMUSG00000007950	Abhd8	478	15	25	75	CCCCATTGCTTGGGACTGGGAGCTAGGCACCCAAGGAGGGAGGGGTCGGAGCCACAAATCCCCGCATATGGCAAC
ENSMUSG00000007950	Abhd8	478	15	26	75	CTGGGAGCTAGGCACCCAAGGAGGGAGGGGTCGGAGCCACAAATCCCCGCATATGGCAACTTGTAAGTCAATAAA
ENSMUSG00000007950	Abhd8	478	15	27	75	CCAAGGAGGGAGGGGTCGGAGCCACAAATCCCCGCATATGGCAACTTGTAAGTCAATAAAATAATAATAATAAAA
ENSMUSG00000007950	Abhd8	478	15	28	73	TCGGAGCCACAAATCCCCGCATATGGCAACTTGTAAGTCAATAAAATAATAATAATAAAAAAGACAATCCAAA
ENSMUSG00000008668	Rps18	160	15	1	75	AGAAAATTCGAGCCCATAGAGGGCTGCGCCACTTTTGGGGCCTTCGTGTCCGCGGTCAGCACACCAAGACCACTG
ENSMUSG00000008668	Rps18	160	15	2	75	ATAGAGGGCTGCGCCACTTTTGGGGCCTTCGTGTCCGCGGTCAGCACACCAAGACCACTGGCCGCAGGGGCCGAA
ENSMUSG00000008668	Rps18	160	15	3	75	ACTTTTGGGGCCTTCGTGTCCGCGGTCAGCACACCAAGACCACTGGCCGCAGGGGCCGAACTGTGGGTGTATCCA
ENSMUSG00000008668	Rps18	160	15	4	75	GTGTCCGCGGTCAGCACACCAAGACCACTGGCCGCAGGGGCCGAACTGTGGGTGTATCCAAGAAGAAATGAGTCT
ENSMUSG00000008668	Rps18	160	15	5	75	ACACCAAGACCACTGGCCGCAGGGGCCGAACTGTGGGTGTATCCAAGAAGAAATGAGTCTCTGGGCCTTTGCTGT
ENSMUSG00000008668	Rps18	160	15	6	75	GCCGCAGGGGCCGAACTGTGGGTGTATCCAAGAAGAAATGAGTCTCTGGGCCTTTGCTGTTAATAAATAGTTTAT
ENSMUSG00000008668	Rps18	160	15	7	70	CTGTGGGTGTATCCAAGAAGAAATGAGTCTCTGGGCCTTTGCTGTTAATAAATAGTTTATATACCTATGA
ENSMUSG00000009073	Nf2	2378	25	1	100	CAGGTGACCCGGCCACCTCCTGCCACATCTGCTGCTCCTGACACCAACAGGATGGGCCTGACCCAAAAGGAACCATCAGTAGAGGGCTGGCTTGTTTGGG
ENSMUSG00000009073	Nf2	2378	25	2	100	CATCTGCTGCTCCTGACACCAACAGGATGGGCCTGACCCAAAAGGAACCATCAGTAGAGGGCTGGCTTGTTTGGGAACTCTTGAGTTGAGGGCCCCGTGC
ENSMUSG00000009073	Nf2	2378	25	3	100	GATGGGCCTGACCCAAAAGGAACCATCAGTAGAGGGCTGGCTTGTTTGGGAACTCTTGAGTTGAGGGCCCCGTGCCACTCTGACCCTATAGAGAGGTTTC
ENSMUSG00000009073	Nf2	2378	25	4	100	TCAGTAGAGGGCTGGCTTGTTTGGGAACTCTTGAGTTGAGGGCCCCGTGCCACTCTGACCCTATAGAGAGGTTTCTCAATGTGTTCTAGTTCTCCTTGCC
ENSMUSG00000009073	Nf2	2378	25	5	100	AACTCTTGAGTTGAGGGCCCCGTGCCACTCTGACCCTATAGAGAGGTTTCTCAATGTGTTCTAGTTCTCCTTGCCTCCTGCATACCTGCATATCTCTCTC
ENSMUSG00000009073	Nf2	2378	25	6	100	CACTCTGACCCTATAGAGAGGTTTCTCAATGTGTTCTAGTTCTCCTTGCCTCCTGCATACCTGCATATCTCTCTCTCCCTCCCTCTCTCTCTCTCTCCTT
ENSMUSG00000009073	Nf2	2378	25	7	100	TCAATGTGTTCTAGTTCTCCTTGCCTCCTGCATACCTGCATATCTCTCTCTCCCTCCCTCTCTCTCTCTCTCCTTCTCTCTCTCTCTCTCTCTCTCTCTC
ENSMUSG00000009073	Nf2	2378	25	8	100	TCCTGCATACCTGCATATCTCTCTCTCCCTCCCTCTCTCTCTCTCTCCTTCTCTCTCTCTCTCTCTCTCTCTCTCTCTCTCTCTCTCTCTCTCTTATATA
ENSMUSG00000009073	Nf2	2378	25	9	100	TCCCTCCCTCTCTCTCTCTCTCCTTCTCTCTCTCTCTCTCTCTCTCTCTCTCTCTCTCTCTCTCTCTCTTATATAAATACTTGTTGTGTGTGGGCTGCCA
ENSMUSG00000009073	Nf2	2378	25	10	100	CTCTCTCTCTCTCTCTCTCTCTCTCTCTCTCTCTCTCTCTCTCTTATATAAATACTTGTTGTGTGTGGGCTGCCATCCTTCCTGCACCCAAGCACTGTGG
ENSMUSG00000009073	Nf2	2378	25	11	100	TCTCTCTCTCTCTCTCTCTTATATAAATACTTGTTGTGTGTGGGCTGCCATCCTTCCTGCACCCAAGCACTGTGGTGCACGGGTTGCTGTGCTTGCTGAC
ENSMUSG00000009073	Nf2	2378	25	12	100	AATACTTGTTGTGTGTGGGCTGCCATCCTTCCTGCACCCAAGCACTGTGGTGCACGGGTTGCTGTGCTTGCTGACATTGAGAATCGGCTGTGGGAGTCCA
ENSMUSG00000009073	Nf2	2378	25	13	100	TCCTTCCTGCACCCAAGCACTGTGGTGCACGGGTTGCTGTGCTTGCTGACATTGAGAATCGGCTGTGGGAGTCCAGTGTGAAAGCTGGCTGAAATCTACC
ENSMUSG00000009073	Nf2	2378	25	14	100	TGCACGGGTTGCTGTGCTTGCTGACATTGAGAATCGGCTGTGGGAGTCCAGTGTGAAAGCTGGCTGAAATCTACCATGCAGGTGCTACCCACTCCCCAAC
ENSMUSG00000009073	Nf2	2378	25	15	100	ATTGAGAATCGGCTGTGGGAGTCCAGTGTGAAAGCTGGCTGAAATCTACCATGCAGGTGCTACCCACTCCCCAACTGGGCTTCTGGGATGGGCCTCCCCT
ENSMUSG00000009073	Nf2	2378	25	16	100	GTGTGAAAGCTGGCTGAAATCTACCATGCAGGTGCTACCCACTCCCCAACTGGGCTTCTGGGATGGGCCTCCCCTCCAAGCATGGGGTAGAAGTGTGGAC
ENSMUSG00000009073	Nf2	2378	25	17	100	ATGCAGGTGCTACCCACTCCCCAACTGGGCTTCTGGGATGGGCCTCCCCTCCAAGCATGGGGTAGAAGTGTGGACTGGCTTAGCTCAGAACCAGCAATGG
ENSMUSG00000009073	Nf2	2378	25	18	100	TGGGCTTCTGGGATGGGCCTCCCCTCCAAGCATGGGGTAGAAGTGTGGACTGGCTTAGCTCAGAACCAGCAATGGGGGTTGGGGATTTAGCTCAGTGAGA
ENSMUSG00000009073	Nf2	2378	25	19	100	CCAAGCATGGGGTAGAAGTGTGGACTGGCTTAGCTCAGAACCAGCAATGGGGGTTGGGGATTTAGCTCAGTGAGAGCGCTTACTCGGGCCCTGGGTTCGG
ENSMUSG00000009073	Nf2	2378	25	20	100	TGGCTTAGCTCAGAACCAGCAATGGGGGTTGGGGATTTAGCTCAGTGAGAGCGCTTACTCGGGCCCTGGGTTCGGTCCTCAGCTCTGGGGGGGGAAAAAA
ENSMUSG00000009073	Nf2	2378	25	21	100	GGGTTGGGGATTTAGCTCAGTGAGAGCGCTTACTCGGGCCCTGGGTTCGGTCCTCAGCTCTGGGGGGGGAAAAAAAAAGAACCAGCAACGATGGCTCCTT
ENSMUSG00000009073	Nf2	2378	25	22	100	GCGCTTACTCGGGCCCTGGGTTCGGTCCTCAGCTCTGGGGGGGGAAAAAAAAAGAACCAGCAACGATGGCTCCTTAGCCAGGCTCACCTGAGGCAGTGTA
ENSMUSG00000009073	Nf2	2378	25	23	100	TCCTCAGCTCTGGGGGGGGAAAAAAAAAGAACCAGCAACGATGGCTCCTTAGCCAGGCTCACCTGAGGCAGTGTAGCTGTCTGAATGGCAGGTAACAGGC
ENSMUSG00000009073	Nf2	2378	25	24	100	AAAGAACCAGCAACGATGGCTCCTTAGCCAGGCTCACCTGAGGCAGTGTAGCTGTCTGAATGGCAGGTAACAGGCAAGACAGCTGTGGCTAGGAAGAGGC
ENSMUSG00000009073	Nf2	2378	25	25	100	AGCCAGGCTCACCTGAGGCAGTGTAGCTGTCTGAATGGCAGGTAACAGGCAAGACAGCTGTGGCTAGGAAGAGGCTTAAGATAGAGGCTGTTGGGAGACA
ENSMUSG00000009073	Nf2	2378	25	26	100	GCTGTCTGAATGGCAGGTAACAGGCAAGACAGCTGTGGCTAGGAAGAGGCTTAAGATAGAGGCTGTTGGGAGACACTGCACATGAGCCTTTGGTGGGCCA
ENSMUSG00000009073	Nf2	2378	25	27	100	AAGACAGCTGTGGCTAGGAAGAGGCTTAAGATAGAGGCTGTTGGGAGACACTGCACATGAGCCTTTGGTGGGCCAGGAGCTTCCCAGTCACATTCCCATC
ENSMUSG00000009073	Nf2	2378	25	28	100	TTAAGATAGAGGCTGTTGGGAGACACTGCACATGAGCCTTTGGTGGGCCAGGAGCTTCCCAGTCACATTCCCATCAGTGCCTGGGAACCCAGCTGTGACC
ENSMUSG00000009073	Nf2	2378	25	29	100	CTGCACATGAGCCTTTGGTGGGCCAGGAGCTTCCCAGTCACATTCCCATCAGTGCCTGGGAACCCAGCTGTGACCAGGACCTCTGTCTCCTCCCCCTCAG
ENSMUSG00000009073	Nf2	2378	25	30	100	GGAGCTTCCCAGTCACATTCCCATCAGTGCCTGGGAACCCAGCTGTGACCAGGACCTCTGTCTCCTCCCCCTCAGCACATGGAACCCCAGAGCCCTGCTA
ENSMUSG00000009073	Nf2	2378	25	31	100	AGTGCCTGGGAACCCAGCTGTGACCAGGACCTCTGTCTCCTCCCCCTCAGCACATGGAACCCCAGAGCCCTGCTACCCGTCCATCATCCTCTTCAACACC
ENSMUSG00000009073	Nf2	2378	25	32	100	AGGACCTCTGTCTCCTCCCCCTCAGCACATGGAACCCCAGAGCCCTGCTACCCGTCCATCATCCTCTTCAACACCTAGGCCTCACTGTCATTGTCCTTTT
ENSMUSG00000009073	Nf2	2378	25	33	100	CACATGGAACCCCAGAGCCCTGCTACCCGTCCATCATCCTCTTCAACACCTAGGCCTCACTGTCATTGTCCTTTTCTTCCCCAGGAGCCCAGCAGTGTCC
ENSMUSG00000009073	Nf2	2378	25	34	100	CCCGTCCATCATCCTCTTCAACACCTAGGCCTCACTGTCATTGTCCTTTTCTTCCCCAGGAGCCCAGCAGTGTCCTTTTAGTCCTTCCTTTCCTGAGCCT
ENSMUSG00000009073	Nf2	2378	25	35	100	TAGGCCTCACTGTCATTGTCCTTTTCTTCCCCAGGAGCCCAGCAGTGTCCTTTTAGTCCTTCCTTTCCTGAGCCTGACAGAGATATCAGGCTACTAACAG
ENSMUSG00000009073	Nf2	2378	25	36	100	CTTCCCCAGGAGCCCAGCAGTGTCCTTTTAGTCCTTCCTTTCCTGAGCCTGACAGAGATATCAGGCTACTAACAGTCACACAAGCTAACACTATGGGTTG
ENSMUSG00000009073	Nf2	2378	25	37	100	TTTTAGTCCTTCCTTTCCTGAGCCTGACAGAGATATCAGGCTACTAACAGTCACACAAGCTAACACTATGGGTTGCCTCCATGCTAGGCAACAAATGCTT
ENSMUSG00000009073	Nf2	2378	25	38	100	GACAGAGATATCAGGCTACTAACAGTCACACAAGCTAACACTATGGGTTGCCTCCATGCTAGGCAACAAATGCTTACCATGTGCCTCACACACTCCATGA
ENSMUSG00000009073	Nf2	2378	25	39	100	TCACACAAGCTAACACTATGGGTTGCCTCCATGCTAGGCAACAAATGCTTACCATGTGCCTCACACACTCCATGATTGGGCCTATCTTCTATGTAACTGG
ENSMUSG00000009073	Nf2	2378	25	40	100	CCTCCATGCTAGGCAACAAATGCTTACCATGTGCCTCACACACTCCATGATTGGGCCTATCTTCTATGTAACTGGGGTCACTAGTGTAGCCGACCAGAAC
ENSMUSG00000009073	Nf2	2378	25	41	100	ACCATGTGCCTCACACACTCCATGATTGGGCCTATCTTCTATGTAACTGGGGTCACTAGTGTAGCCGACCAGAACCCTTTAAGTCCTACAGAGCAGGTGA
ENSMUSG00000009073	Nf2	2378	25	42	100	TTGGGCCTATCTTCTATGTAACTGGGGTCACTAGTGTAGCCGACCAGAACCCTTTAAGTCCTACAGAGCAGGTGATCTGCCTCAGTCCACAAGCAGATGT
ENSMUSG00000009073	Nf2	2378	25	43	100	GGTCACTAGTGTAGCCGACCAGAACCCTTTAAGTCCTACAGAGCAGGTGATCTGCCTCAGTCCACAAGCAGATGTATATTAACTGAGGACAGCTGAGCTG
ENSMUSG00000009073	Nf2	2378	25	44	100	CCTTTAAGTCCTACAGAGCAGGTGATCTGCCTCAGTCCACAAGCAGATGTATATTAACTGAGGACAGCTGAGCTGAGGGGCTGAGCAAGGCGATGTTCCA
ENSMUSG00000009073	Nf2	2378	25	45	100	TCTGCCTCAGTCCACAAGCAGATGTATATTAACTGAGGACAGCTGAGCTGAGGGGCTGAGCAAGGCGATGTTCCACAGTACGGTTTGTTTTTGAGAAACT
ENSMUSG00000009073	Nf2	2378	25	46	100	ATATTAACTGAGGACAGCTGAGCTGAGGGGCTGAGCAAGGCGATGTTCCACAGTACGGTTTGTTTTTGAGAAACTGAGGCACACCACCTTGTTCCCGGGC
ENSMUSG00000009073	Nf2	2378	25	47	100	AGGGGCTGAGCAAGGCGATGTTCCACAGTACGGTTTGTTTTTGAGAAACTGAGGCACACCACCTTGTTCCCGGGCTGTTATTGGGCCACTTTGTCATAGG
ENSMUSG00000009073	Nf2	2378	25	48	100	CAGTACGGTTTGTTTTTGAGAAACTGAGGCACACCACCTTGTTCCCGGGCTGTTATTGGGCCACTTTGTCATAGGCAGCCACCCAATGGTCACCTCAGCA
ENSMUSG00000009073	Nf2	2378	25	49	100	GAGGCACACCACCTTGTTCCCGGGCTGTTATTGGGCCACTTTGTCATAGGCAGCCACCCAATGGTCACCTCAGCATCTTTGGGCACCTGTGATAGCACTC
ENSMUSG00000009073	Nf2	2378	25	50	100	TGTTATTGGGCCACTTTGTCATAGGCAGCCACCCAATGGTCACCTCAGCATCTTTGGGCACCTGTGATAGCACTCTAGTCTGAAACCTAAGGCTGAGGAG
ENSMUSG00000009073	Nf2	2378	25	51	100	CAGCCACCCAATGGTCACCTCAGCATCTTTGGGCACCTGTGATAGCACTCTAGTCTGAAACCTAAGGCTGAGGAGAAGGTCTCTGGACTTGACACCCCAG
ENSMUSG00000009073	Nf2	2378	25	52	100	TCTTTGGGCACCTGTGATAGCACTCTAGTCTGAAACCTAAGGCTGAGGAGAAGGTCTCTGGACTTGACACCCCAGTATTTGCCGAGTCTTCCCTGGCTGC
ENSMUSG00000009073	Nf2	2378	25	53	100	TAGTCTGAAACCTAAGGCTGAGGAGAAGGTCTCTGGACTTGACACCCCAGTATTTGCCGAGTCTTCCCTGGCTGCTCTGAAGTTGAGCTGTGTTCTCTGG
ENSMUSG00000009073	Nf2	2378	25	54	100	AAGGTCTCTGGACTTGACACCCCAGTATTTGCCGAGTCTTCCCTGGCTGCTCTGAAGTTGAGCTGTGTTCTCTGGCCTGAAACTGCTCTCTGACTTTCTT
ENSMUSG00000009073	Nf2	2378	25	55	100	TATTTGCCGAGTCTTCCCTGGCTGCTCTGAAGTTGAGCTGTGTTCTCTGGCCTGAAACTGCTCTCTGACTTTCTTCCTCTCTGTACACTTGATTTAACAA
ENSMUSG00000009073	Nf2	2378	25	56	100	TCTGAAGTTGAGCTGTGTTCTCTGGCCTGAAACTGCTCTCTGACTTTCTTCCTCTCTGTACACTTGATTTAACAATGGCTGTGGGACACGAGACAATGAT
ENSMUSG00000009073	Nf2	2378	25	57	100	CCTGAAACTGCTCTCTGACTTTCTTCCTCTCTGTACACTTGATTTAACAATGGCTGTGGGACACGAGACAATGATGCTGGTTTATAAAAATTATGCCAGG
ENSMUSG00000009073	Nf2	2378	25	58	100	CCTCTCTGTACACTTGATTTAACAATGGCTGTGGGACACGAGACAATGATGCTGGTTTATAAAAATTATGCCAGGCCTTCCTTGGCTTTTTCATTTAACT
ENSMUSG00000009073	Nf2	2378	25	59	100	TGGCTGTGGGACACGAGACAATGATGCTGGTTTATAAAAATTATGCCAGGCCTTCCTTGGCTTTTTCATTTAACTACGCTTTATATCTCAAATTTGGGAA
ENSMUSG00000009073	Nf2	2378	25	60	100	GCTGGTTTATAAAAATTATGCCAGGCCTTCCTTGGCTTTTTCATTTAACTACGCTTTATATCTCAAATTTGGGAAATACCAAGCTACATAACCACGTGGG
ENSMUSG00000009073	Nf2	2378	25	61	100	CCTTCCTTGGCTTTTTCATTTAACTACGCTTTATATCTCAAATTTGGGAAATACCAAGCTACATAACCACGTGGGCGCCCTGGTATTTGAGGAATGGTGG
ENSMUSG00000009073	Nf2	2378	25	62	100	ACGCTTTATATCTCAAATTTGGGAAATACCAAGCTACATAACCACGTGGGCGCCCTGGTATTTGAGGAATGGTGGGTGTAACCATTTCGCCATTTCTTGG
ENSMUSG00000009073	Nf2	2378	25	63	100	ATACCAAGCTACATAACCACGTGGGCGCCCTGGTATTTGAGGAATGGTGGGTGTAACCATTTCGCCATTTCTTGGAAGGTGAGGTCCAAACCCCACTCAG
ENSMUSG00000009073	Nf2	2378	25	64	100	CGCCCTGGTATTTGAGGAATGGTGGGTGTAACCATTTCGCCATTTCTTGGAAGGTGAGGTCCAAACCCCACTCAGAAGTACCTCAGCTCCGAGAGAGAGA
ENSMUSG00000009073	Nf2	2378	25	65	100	GTGTAACCATTTCGCCATTTCTTGGAAGGTGAGGTCCAAACCCCACTCAGAAGTACCTCAGCTCCGAGAGAGAGAGAGAGAGAGAGAGGGGGCGGGGGGG
ENSMUSG00000009073	Nf2	2378	25	66	100	AAGGTGAGGTCCAAACCCCACTCAGAAGTACCTCAGCTCCGAGAGAGAGAGAGAGAGAGAGAGGGGGCGGGGGGGAGAGAGAGAGAGAGCTCGAATGGGT
ENSMUSG00000009073	Nf2	2378	25	67	100	AAGTACCTCAGCTCCGAGAGAGAGAGAGAGAGAGAGAGGGGGCGGGGGGGAGAGAGAGAGAGAGCTCGAATGGGTCCCCAGAATGTCTCCAGCCTGCTTT
ENSMUSG00000009073	Nf2	2378	25	68	100	GAGAGAGAGAGAGGGGGCGGGGGGGAGAGAGAGAGAGAGCTCGAATGGGTCCCCAGAATGTCTCCAGCCTGCTTTGAGCCTGTAGCTGGGTTCTTACTGG
ENSMUSG00000009073	Nf2	2378	25	69	100	AGAGAGAGAGAGAGCTCGAATGGGTCCCCAGAATGTCTCCAGCCTGCTTTGAGCCTGTAGCTGGGTTCTTACTGGTAGAAAATTTTAGTCAAAGAGAAAC
ENSMUSG00000009073	Nf2	2378	25	70	100	CCCCAGAATGTCTCCAGCCTGCTTTGAGCCTGTAGCTGGGTTCTTACTGGTAGAAAATTTTAGTCAAAGAGAAACATCTGAAGTCCAAAGTGAGGCCCAA
ENSMUSG00000009073	Nf2	2378	25	71	100	GAGCCTGTAGCTGGGTTCTTACTGGTAGAAAATTTTAGTCAAAGAGAAACATCTGAAGTCCAAAGTGAGGCCCAACCCTGGCTCTTCCTAGTTTCAATGG
ENSMUSG00000009073	Nf2	2378	25	72	100	TAGAAAATTTTAGTCAAAGAGAAACATCTGAAGTCCAAAGTGAGGCCCAACCCTGGCTCTTCCTAGTTTCAATGGTTTCTGAAGCATAGGCAGGGGTACC
ENSMUSG00000009073	Nf2	2378	25	73	100	ATCTGAAGTCCAAAGTGAGGCCCAACCCTGGCTCTTCCTAGTTTCAATGGTTTCTGAAGCATAGGCAGGGGTACCCTGCTACTGAAACAGCAAGTCACTC
ENSMUSG00000009073	Nf2	2378	25	74	100	CCCTGGCTCTTCCTAGTTTCAATGGTTTCTGAAGCATAGGCAGGGGTACCCTGCTACTGAAACAGCAAGTCACTCTCAGTGCAGGACACTGAGGCCTTGC
ENSMUSG00000009073	Nf2	2378	25	75	100	TTTCTGAAGCATAGGCAGGGGTACCCTGCTACTGAAACAGCAAGTCACTCTCAGTGCAGGACACTGAGGCCTTGCTCTTGCCTGTGGCTGGTCACAAACC
ENSMUSG00000009073	Nf2	2378	25	76	100	CTGCTACTGAAACAGCAAGTCACTCTCAGTGCAGGACACTGAGGCCTTGCTCTTGCCTGTGGCTGGTCACAAACCCTGATTGAGGCAGTACCTGAGCCGC
ENSMUSG00000009073	Nf2	2378	25	77	100	TCAGTGCAGGACACTGAGGCCTTGCTCTTGCCTGTGGCTGGTCACAAACCCTGATTGAGGCAGTACCTGAGCCGCCACAGCACTCTGACCTGAGGTCACT
ENSMUSG00000009073	Nf2	2378	25	78	100	TCTTGCCTGTGGCTGGTCACAAACCCTGATTGAGGCAGTACCTGAGCCGCCACAGCACTCTGACCTGAGGTCACTGCCAACCCCTGCTAGACAACACCAG
ENSMUSG00000009073	Nf2	2378	25	79	100	CTGATTGAGGCAGTACCTGAGCCGCCACAGCACTCTGACCTGAGGTCACTGCCAACCCCTGCTAGACAACACCAGTGGGCTTCACTTACTGCTATATCCT
ENSMUSG00000009073	Nf2	2378	25	80	100	CACAGCACTCTGACCTGAGGTCACTGCCAACCCCTGCTAGACAACACCAGTGGGCTTCACTTACTGCTATATCCTCTTTTAGACAGGTTTCTCATGCTCC
ENSMUSG00000009073	Nf2	2378	25	81	100	GCCAACCCCTGCTAGACAACACCAGTGGGCTTCACTTACTGCTATATCCTCTTTTAGACAGGTTTCTCATGCTCCCATACTTTCAAAAAGCCCAGAGGCT
ENSMUSG00000009073	Nf2	2378	25	82	100	TGGGCTTCACTTACTGCTATATCCTCTTTTAGACAGGTTTCTCATGCTCCCATACTTTCAAAAAGCCCAGAGGCTGACTCCCAGCAACAGTGACTAACCG
ENSMUSG00000009073	Nf2	2378	25	83	100	CTTTTAGACAGGTTTCTCATGCTCCCATACTTTCAAAAAGCCCAGAGGCTGACTCCCAGCAACAGTGACTAACCGTTCCTGCCAACAGGGCCAGAGCCTC
ENSMUSG00000009073	Nf2	2378	25	84	100	CATACTTTCAAAAAGCCCAGAGGCTGACTCCCAGCAACAGTGACTAACCGTTCCTGCCAACAGGGCCAGAGCCTCAAAGTCCCTGGTACAAGCAGCCTTC
ENSMUSG00000009073	Nf2	2378	25	85	100	GACTCCCAGCAACAGTGACTAACCGTTCCTGCCAACAGGGCCAGAGCCTCAAAGTCCCTGGTACAAGCAGCCTTCACAGAGGACCCAGACTCTCCTAGGT
ENSMUSG00000009073	Nf2	2378	25	86	100	TTCCTGCCAACAGGGCCAGAGCCTCAAAGTCCCTGGTACAAGCAGCCTTCACAGAGGACCCAGACTCTCCTAGGTGCCTTGAGGCCACGCCAGTGCCCAT
ENSMUSG00000009073	Nf2	2378	25	87	100	AAAGTCCCTGGTACAAGCAGCCTTCACAGAGGACCCAGACTCTCCTAGGTGCCTTGAGGCCACGCCAGTGCCCATGGGCTTCCATTCCTCTGTTACTCTT
ENSMUSG00000009073	Nf2	2378	25	88	100	ACAGAGGACCCAGACTCTCCTAGGTGCCTTGAGGCCACGCCAGTGCCCATGGGCTTCCATTCCTCTGTTACTCTTTTCAAACAGCTCTTCATGTGAGGCT
ENSMUSG00000009073	Nf2	2378	25	89	100	GCCTTGAGGCCACGCCAGTGCCCATGGGCTTCCATTCCTCTGTTACTCTTTTCAAACAGCTCTTCATGTGAGGCTCCTGTCACTCCTATCGGGGCCAGGA
ENSMUSG00000009073	Nf2	2378	25	90	100	GGGCTTCCATTCCTCTGTTACTCTTTTCAAACAGCTCTTCATGTGAGGCTCCTGTCACTCCTATCGGGGCCAGGACATGAAGCTGGTTTCTGGGGGTTGG
ENSMUSG00000009073	Nf2	2378	25	91	100	TTCAAACAGCTCTTCATGTGAGGCTCCTGTCACTCCTATCGGGGCCAGGACATGAAGCTGGTTTCTGGGGGTTGGGGTGATTATAATTTAAGTGATTGTT
ENSMUSG00000009073	Nf2	2378	25	92	103	CCTGTCACTCCTATCGGGGCCAGGACATGAAGCTGGTTTCTGGGGGTTGGGGTGATTATAATTTAAGTGATTGTTTTAATAAAAACTCTAAGCTGCTATAGTC
ENSMUSG00000013076	Amotl1	5826	25	1	100	CGTCGTCCTGTGGCGCTTGCCAGCATGCTGACAGATGAGAACAGAGGCTGAAAGAAGAGCTCCAGATGGGCAGTTGCAGTAGCAACTGCAAAACCAGGAC
ENSMUSG00000013076	Amotl1	5826	25	2	100	TGCTGACAGATGAGAACAGAGGCTGAAAGAAGAGCTCCAGATGGGCAGTTGCAGTAGCAACTGCAAAACCAGGACAGGTGTGGACTCGTCACAATGTTAC
ENSMUSG00000013076	Amotl1	5826	25	3	100	AAAGAAGAGCTCCAGATGGGCAGTTGCAGTAGCAACTGCAAAACCAGGACAGGTGTGGACTCGTCACAATGTTACCAAAACAGCTGGCTCACTATCTGCA
ENSMUSG00000013076	Amotl1	5826	25	4	100	GCAGTAGCAACTGCAAAACCAGGACAGGTGTGGACTCGTCACAATGTTACCAAAACAGCTGGCTCACTATCTGCAGAGGGAGTGAGAGAGGACGCATGTA
ENSMUSG00000013076	Amotl1	5826	25	5	100	AGGTGTGGACTCGTCACAATGTTACCAAAACAGCTGGCTCACTATCTGCAGAGGGAGTGAGAGAGGACGCATGTAGGCTTGGAAGCAGAGTAGAGAAGGA
ENSMUSG00000013076	Amotl1	5826	25	6	100	CAAAACAGCTGGCTCACTATCTGCAGAGGGAGTGAGAGAGGACGCATGTAGGCTTGGAAGCAGAGTAGAGAAGGAGGAGGAGTGGAATTTTCCATTGTAG
ENSMUSG00000013076	Amotl1	5826	25	7	100	GAGGGAGTGAGAGAGGACGCATGTAGGCTTGGAAGCAGAGTAGAGAAGGAGGAGGAGTGGAATTTTCCATTGTAGAGAAATTGTATGTCTTAGGGAGGCT
ENSMUSG00000013076	Amotl1	5826	25	8	100	GGCTTGGAAGCAGAGTAGAGAAGGAGGAGGAGTGGAATTTTCCATTGTAGAGAAATTGTATGTCTTAGGGAGGCTCCATGCTTCCCCATTCTTGGCTTAT
ENSMUSG00000013076	Amotl1	5826	25	9	100	GGAGGAGTGGAATTTTCCATTGTAGAGAAATTGTATGTCTTAGGGAGGCTCCATGCTTCCCCATTCTTGGCTTATAAACAGATGAAGAAGAGCTGGGCCT
ENSMUSG00000013076	Amotl1	5826	25	10	100	AGAAATTGTATGTCTTAGGGAGGCTCCATGCTTCCCCATTCTTGGCTTATAAACAGATGAAGAAGAGCTGGGCCTTCCTTGGAATCCCCTTGTTCCCTTT
ENSMUSG00000013076	Amotl1	5826	25	11	100	CCATGCTTCCCCATTCTTGGCTTATAAACAGATGAAGAAGAGCTGGGCCTTCCTTGGAATCCCCTTGTTCCCTTTGCCTTTTAGCAGGTTTGGTTTAAGA
ENSMUSG00000013076	Amotl1	5826	25	12	100	AAACAGATGAAGAAGAGCTGGGCCTTCCTTGGAATCCCCTTGTTCCCTTTGCCTTTTAGCAGGTTTGGTTTAAGAAGAATCTGCTAGAAATCCTGAAAGC
ENSMUSG00000013076	Amotl1	5826	25	13	100	TCCTTGGAATCCCCTTGTTCCCTTTGCCTTTTAGCAGGTTTGGTTTAAGAAGAATCTGCTAGAAATCCTGAAAGCCCATCTCGGCATAATGGTGTGTGTG
ENSMUSG00000013076	Amotl1	5826	25	14	100	GCCTTTTAGCAGGTTTGGTTTAAGAAGAATCTGCTAGAAATCCTGAAAGCCCATCTCGGCATAATGGTGTGTGTGTGTGTGTGTGTGTGTGTGTGTGTGT
ENSMUSG00000013076	Amotl1	5826	25	15	100	AGAATCTGCTAGAAATCCTGAAAGCCCATCTCGGCATAATGGTGTGTGTGTGTGTGTGTGTGTGTGTGTGTGTGTGTGTGTGTGTGTGTGGTGTCCTTAG
ENSMUSG00000013076	Amotl1	5826	25	16	100	CCATCTCGGCATAATGGTGTGTGTGTGTGTGTGTGTGTGTGTGTGTGTGTGTGTGTGTGTGTGTGGTGTCCTTAGCAAATACATCCAGGATAATGGGGAA
ENSMUSG00000013076	Amotl1	5826	25	17	100	TGTGTGTGTGTGTGTGTGTGTGTGTGTGTGTGTGTGTGTGGTGTCCTTAGCAAATACATCCAGGATAATGGGGAATTTCAAGTTTTGTCACCTTCTTGGC
ENSMUSG00000013076	Amotl1	5826	25	18	100	GTGTGTGTGTGTGTGGTGTCCTTAGCAAATACATCCAGGATAATGGGGAATTTCAAGTTTTGTCACCTTCTTGGCTGTTTCGTTTGTGGTTTGTGATTTC
ENSMUSG00000013076	Amotl1	5826	25	19	100	CAAATACATCCAGGATAATGGGGAATTTCAAGTTTTGTCACCTTCTTGGCTGTTTCGTTTGTGGTTTGTGATTTCAGAGAGTGTGAAGCTTTGCTTGTTT
ENSMUSG00000013076	Amotl1	5826	25	20	100	TTTCAAGTTTTGTCACCTTCTTGGCTGTTTCGTTTGTGGTTTGTGATTTCAGAGAGTGTGAAGCTTTGCTTGTTTGGATTGGATGGTATTTTCTAAGCAG
ENSMUSG00000013076	Amotl1	5826	25	21	100	TGTTTCGTTTGTGGTTTGTGATTTCAGAGAGTGTGAAGCTTTGCTTGTTTGGATTGGATGGTATTTTCTAAGCAGGATGTGAGCAAGATGCCCTTGCCCT
ENSMUSG00000013076	Amotl1	5826	25	22	100	AGAGAGTGTGAAGCTTTGCTTGTTTGGATTGGATGGTATTTTCTAAGCAGGATGTGAGCAAGATGCCCTTGCCCTCACCCATCCTGATTTCTTTGAGCTT
ENSMUSG00000013076	Amotl1	5826	25	23	100	GGATTGGATGGTATTTTCTAAGCAGGATGTGAGCAAGATGCCCTTGCCCTCACCCATCCTGATTTCTTTGAGCTTATCTGTCTCATCTCTACTTACTATT
ENSMUSG00000013076	Amotl1	5826	25	24	100	GATGTGAGCAAGATGCCCTTGCCCTCACCCATCCTGATTTCTTTGAGCTTATCTGTCTCATCTCTACTTACTATTTTATTGTTGTATTTTTCCTGTTTAA
ENSMUSG00000013076	Amotl1	5826	25	25	100	CACCCATCCTGATTTCTTTGAGCTTATCTGTCTCATCTCTACTTACTATTTTATTGTTGTATTTTTCCTGTTTAATTAGACATAGCAGAGTTCCTTATAT
ENSMUSG00000013076	Amotl1	5826	25	26	100	ATCTGTCTCATCTCTACTTACTATTTTATTGTTGTATTTTTCCTGTTTAATTAGACATAGCAGAGTTCCTTATATATGGGACTTAGGAGACTACCATCCT
ENSMUSG00000013076	Amotl1	5826	25	27	100	TTATTGTTGTATTTTTCCTGTTTAATTAGACATAGCAGAGTTCCTTATATATGGGACTTAGGAGACTACCATCCTTGCTGTGGTGTCCAGATGGACAGAG
ENSMUSG00000013076	Amotl1	5826	25	28	100	TTAGACATAGCAGAGTTCCTTATATATGGGACTTAGGAGACTACCATCCTTGCTGTGGTGTCCAGATGGACAGAGCCTCGTGTTGGCACCCCAACTGCTC
ENSMUSG00000013076	Amotl1	5826	25	29	100	ATGGGACTTAGGAGACTACCATCCTTGCTGTGGTGTCCAGATGGACAGAGCCTCGTGTTGGCACCCCAACTGCTCTTCCCACCTTTGCTTAGCAGAACTG
ENSMUSG00000013076	Amotl1	5826	25	30	100	TGCTGTGGTGTCCAGATGGACAGAGCCTCGTGTTGGCACCCCAACTGCTCTTCCCACCTTTGCTTAGCAGAACTGCAGCTGTCAGCCTTATTGTGAGCTA
ENSMUSG00000013076	Amotl1	5826	25	31	100	CCTCGTGTTGGCACCCCAACTGCTCTTCCCACCTTTGCTTAGCAGAACTGCAGCTGTCAGCCTTATTGTGAGCTAGAGATACCTGGCTGAGGAGTCCATG
ENSMUSG00000013076	Amotl1	5826	25	32	100	TTCCCACCTTTGCTTAGCAGAACTGCAGCTGTCAGCCTTATTGTGAGCTAGAGATACCTGGCTGAGGAGTCCATGAGTTGCTGACATAACATCATGCCTC
ENSMUSG00000013076	Amotl1	5826	25	33	100	CAGCTGTCAGCCTTATTGTGAGCTAGAGATACCTGGCTGAGGAGTCCATGAGTTGCTGACATAACATCATGCCTCTGATGTGCATCTCTCTCACGTCCAC
ENSMUSG00000013076	Amotl1	5826	25	34	100	GAGATACCTGGCTGAGGAGTCCATGAGTTGCTGACATAACATCATGCCTCTGATGTGCATCTCTCTCACGTCCACACTCTTGCTAGGAGGTTGACAATTA
ENSMUSG00000013076	Amotl1	5826	25	35	100	AGTTGCTGACATAACATCATGCCTCTGATGTGCATCTCTCTCACGTCCACACTCTTGCTAGGAGGTTGACAATTACACCCCATCGCCCTGTGGGGAAGAC
ENSMUSG00000013076	Amotl1	5826	25	36	100	TGATGTGCATCTCTCTCACGTCCACACTCTTGCTAGGAGGTTGACAATTACACCCCATCGCCCTGTGGGGAAGACTTCCTTGTGAATAGGTGCCACAGGA
ENSMUSG00000013076	Amotl1	5826	25	37	100	ACTCTTGCTAGGAGGTTGACAATTACACCCCATCGCCCTGTGGGGAAGACTTCCTTGTGAATAGGTGCCACAGGAACCCATGATGGCTTACCCAGAGCTC
ENSMUSG00000013076	Amotl1	5826	25	38	100	CACCCCATCGCCCTGTGGGGAAGACTTCCTTGTGAATAGGTGCCACAGGAACCCATGATGGCTTACCCAGAGCTCTCTAGGTAGCATGGGAGGTCTCAGC
ENSMUSG00000013076	Amotl1	5826	25	39	100	TTCCTTGTGAATAGGTGCCACAGGAACCCATGATGGCTTACCCAGAGCTCTCTAGGTAGCATGGGAGGTCTCAGCAGGCATCCCCAGCCTTTCTTGTATT
ENSMUSG00000013076	Amotl1	5826	25	40	100	ACCCATGATGGCTTACCCAGAGCTCTCTAGGTAGCATGGGAGGTCTCAGCAGGCATCCCCAGCCTTTCTTGTATTTGAAGCTCTCAGGTGGTCTTTTGTT
ENSMUSG00000013076	Amotl1	5826	25	41	100	TCTAGGTAGCATGGGAGGTCTCAGCAGGCATCCCCAGCCTTTCTTGTATTTGAAGCTCTCAGGTGGTCTTTTGTTGCTCTCCCCTGCCCCATTCTGCCCT
ENSMUSG00000013076	Amotl1	5826	25	42	100	AGGCATCCCCAGCCTTTCTTGTATTTGAAGCTCTCAGGTGGTCTTTTGTTGCTCTCCCCTGCCCCATTCTGCCCTGGTTGCTGTTGATAAGCACAGTGCC
ENSMUSG00000013076	Amotl1	5826	25	43	100	TGAAGCTCTCAGGTGGTCTTTTGTTGCTCTCCCCTGCCCCATTCTGCCCTGGTTGCTGTTGATAAGCACAGTGCCATCCCTGATCAATTCTTTTTCCCTG
ENSMUSG00000013076	Amotl1	5826	25	44	100	GCTCTCCCCTGCCCCATTCTGCCCTGGTTGCTGTTGATAAGCACAGTGCCATCCCTGATCAATTCTTTTTCCCTGTGAATTTGTTTCATAACCCATCAGA
ENSMUSG00000013076	Amotl1	5826	25	45	100	GGTTGCTGTTGATAAGCACAGTGCCATCCCTGATCAATTCTTTTTCCCTGTGAATTTGTTTCATAACCCATCAGACTGGTAGACACACAGCACAATCAGT
ENSMUSG00000013076	Amotl1	5826	25	46	100	ATCCCTGATCAATTCTTTTTCCCTGTGAATTTGTTTCATAACCCATCAGACTGGTAGACACACAGCACAATCAGTATCACAGAAAGGGACACGACTTACC
ENSMUSG00000013076	Amotl1	5826	25	47	100	TGAATTTGTTTCATAACCCATCAGACTGGTAGACACACAGCACAATCAGTATCACAGAAAGGGACACGACTTACCTGAAGTGAGGCAGCAAAGTCATGGA
ENSMUSG00000013076	Amotl1	5826	25	48	100	CTGGTAGACACACAGCACAATCAGTATCACAGAAAGGGACACGACTTACCTGAAGTGAGGCAGCAAAGTCATGGAAATGAGTCCCTATGAACAAGAGGCA
ENSMUSG00000013076	Amotl1	5826	25	49	100	ATCACAGAAAGGGACACGACTTACCTGAAGTGAGGCAGCAAAGTCATGGAAATGAGTCCCTATGAACAAGAGGCAGGACCTGAGGCTGCTGCCACAAGCT
ENSMUSG00000013076	Amotl1	5826	25	50	100	TGAAGTGAGGCAGCAAAGTCATGGAAATGAGTCCCTATGAACAAGAGGCAGGACCTGAGGCTGCTGCCACAAGCTCTCATGTTCATTGCTGTGGAAGCTG
ENSMUSG00000013076	Amotl1	5826	25	51	100	AATGAGTCCCTATGAACAAGAGGCAGGACCTGAGGCTGCTGCCACAAGCTCTCATGTTCATTGCTGTGGAAGCTGGCTTCCTGGAAACCCCAGAAGAAGC
ENSMUSG00000013076	Amotl1	5826	25	52	100	GGACCTGAGGCTGCTGCCACAAGCTCTCATGTTCATTGCTGTGGAAGCTGGCTTCCTGGAAACCCCAGAAGAAGCTGCCCAGGGGAGGGTGAACTATCTC
ENSMUSG00000013076	Amotl1	5826	25	53	100	CTCATGTTCATTGCTGTGGAAGCTGGCTTCCTGGAAACCCCAGAAGAAGCTGCCCAGGGGAGGGTGAACTATCTCCAGATCAGTAAGGTTTATTTCCAAG
ENSMUSG00000013076	Amotl1	5826	25	54	100	GCTTCCTGGAAACCCCAGAAGAAGCTGCCCAGGGGAGGGTGAACTATCTCCAGATCAGTAAGGTTTATTTCCAAGTCCCCTTCCTCATCACTCCTTTTTG
ENSMUSG00000013076	Amotl1	5826	25	55	100	TGCCCAGGGGAGGGTGAACTATCTCCAGATCAGTAAGGTTTATTTCCAAGTCCCCTTCCTCATCACTCCTTTTTGGCTCAAGAGAAAAATGAAAAGTGGT
ENSMUSG00000013076	Amotl1	5826	25	56	100	CAGATCAGTAAGGTTTATTTCCAAGTCCCCTTCCTCATCACTCCTTTTTGGCTCAAGAGAAAAATGAAAAGTGGTAATTCTGTGACGTCAAGTCCCTCTT
ENSMUSG00000013076	Amotl1	5826	25	57	100	TCCCCTTCCTCATCACTCCTTTTTGGCTCAAGAGAAAAATGAAAAGTGGTAATTCTGTGACGTCAAGTCCCTCTTAAGTGCAGCACTGAAAATAGCTTGG
ENSMUSG00000013076	Amotl1	5826	25	58	100	GCTCAAGAGAAAAATGAAAAGTGGTAATTCTGTGACGTCAAGTCCCTCTTAAGTGCAGCACTGAAAATAGCTTGGCTCAGAGAGCTCTGCTTGGATCATG
ENSMUSG00000013076	Amotl1	5826	25	59	100	AATTCTGTGACGTCAAGTCCCTCTTAAGTGCAGCACTGAAAATAGCTTGGCTCAGAGAGCTCTGCTTGGATCATGTGTCCTAGGACTCATCTCTAGGATG
ENSMUSG00000013076	Amotl1	5826	25	60	100	AAGTGCAGCACTGAAAATAGCTTGGCTCAGAGAGCTCTGCTTGGATCATGTGTCCTAGGACTCATCTCTAGGATGAGACTGTGGCCTCCCCAGGTTGAGG
ENSMUSG00000013076	Amotl1	5826	25	61	100	CTCAGAGAGCTCTGCTTGGATCATGTGTCCTAGGACTCATCTCTAGGATGAGACTGTGGCCTCCCCAGGTTGAGGTGGTACATGTATTGTGAGAGACGTA
ENSMUSG00000013076	Amotl1	5826	25	62	100	TGTCCTAGGACTCATCTCTAGGATGAGACTGTGGCCTCCCCAGGTTGAGGTGGTACATGTATTGTGAGAGACGTAGCCTGGAGAACAGAGAAGAAGAGAG
ENSMUSG00000013076	Amotl1	5826	25	63	100	AGACTGTGGCCTCCCCAGGTTGAGGTGGTACATGTATTGTGAGAGACGTAGCCTGGAGAACAGAGAAGAAGAGAGGCAAGGGGAGGAGAGAGCAGTGGTG
ENSMUSG00000013076	Amotl1	5826	25	64	100	TGGTACATGTATTGTGAGAGACGTAGCCTGGAGAACAGAGAAGAAGAGAGGCAAGGGGAGGAGAGAGCAGTGGTGTTTCCCTACAGGACCCTGGACCATC
ENSMUSG00000013076	Amotl1	5826	25	65	100	GCCTGGAGAACAGAGAAGAAGAGAGGCAAGGGGAGGAGAGAGCAGTGGTGTTTCCCTACAGGACCCTGGACCATCTGACAAGACAGAGGAGGTGGGACTA
ENSMUSG00000013076	Amotl1	5826	25	66	100	GCAAGGGGAGGAGAGAGCAGTGGTGTTTCCCTACAGGACCCTGGACCATCTGACAAGACAGAGGAGGTGGGACTAGACTACCCACACTCCACTTGGCAGT
ENSMUSG00000013076	Amotl1	5826	25	67	100	TTTCCCTACAGGACCCTGGACCATCTGACAAGACAGAGGAGGTGGGACTAGACTACCCACACTCCACTTGGCAGTGGGAACCAGGCTGGGAGCCTCCCAC
ENSMUSG00000013076	Amotl1	5826	25	68	100	TGACAAGACAGAGGAGGTGGGACTAGACTACCCACACTCCACTTGGCAGTGGGAACCAGGCTGGGAGCCTCCCACCCCCTCCTTAACTCTTCTCTCAGAT
ENSMUSG00000013076	Amotl1	5826	25	69	100	GACTACCCACACTCCACTTGGCAGTGGGAACCAGGCTGGGAGCCTCCCACCCCCTCCTTAACTCTTCTCTCAGATCTTGCAGCCTGAGTACTGAGCTTGC
ENSMUSG00000013076	Amotl1	5826	25	70	100	GGGAACCAGGCTGGGAGCCTCCCACCCCCTCCTTAACTCTTCTCTCAGATCTTGCAGCCTGAGTACTGAGCTTGCCCTGTGCCTTGTGGGGAAGGGAGTG
ENSMUSG00000013076	Amotl1	5826	25	71	100	CCCCTCCTTAACTCTTCTCTCAGATCTTGCAGCCTGAGTACTGAGCTTGCCCTGTGCCTTGTGGGGAAGGGAGTGAGAAGGCAGCATAAGAGGTCTTGCC
ENSMUSG00000013076	Amotl1	5826	25	72	100	CTTGCAGCCTGAGTACTGAGCTTGCCCTGTGCCTTGTGGGGAAGGGAGTGAGAAGGCAGCATAAGAGGTCTTGCCAGTTGAGACAGAAGCAGGTAGGTGC
ENSMUSG00000013076	Amotl1	5826	25	73	100	CCTGTGCCTTGTGGGGAAGGGAGTGAGAAGGCAGCATAAGAGGTCTTGCCAGTTGAGACAGAAGCAGGTAGGTGCAGGAACTATTTTGGATAGGGCATGT
ENSMUSG00000013076	Amotl1	5826	25	74	100	AGAAGGCAGCATAAGAGGTCTTGCCAGTTGAGACAGAAGCAGGTAGGTGCAGGAACTATTTTGGATAGGGCATGTTGTTCAGTTGATGGCAACTAATTCT
ENSMUSG00000013076	Amotl1	5826	25	75	100	AGTTGAGACAGAAGCAGGTAGGTGCAGGAACTATTTTGGATAGGGCATGTTGTTCAGTTGATGGCAACTAATTCTCTTAAGAACATATTGTCTCCTATTA
ENSMUSG00000013076	Amotl1	5826	25	76	100	AGGAACTATTTTGGATAGGGCATGTTGTTCAGTTGATGGCAACTAATTCTCTTAAGAACATATTGTCTCCTATTAATGTTGGGGACAAACCCAGAAAGGG
ENSMUSG00000013076	Amotl1	5826	25	77	100	TGTTCAGTTGATGGCAACTAATTCTCTTAAGAACATATTGTCTCCTATTAATGTTGGGGACAAACCCAGAAAGGGAAGGGTATAGAGATGGGGAATTGGT
ENSMUSG00000013076	Amotl1	5826	25	78	100	CTTAAGAACATATTGTCTCCTATTAATGTTGGGGACAAACCCAGAAAGGGAAGGGTATAGAGATGGGGAATTGGTGAGATCTTCCAGCCCTGAGACCATG
ENSMUSG00000013076	Amotl1	5826	25	79	100	ATGTTGGGGACAAACCCAGAAAGGGAAGGGTATAGAGATGGGGAATTGGTGAGATCTTCCAGCCCTGAGACCATGTCTGAGCCACCCCAAACTTAGGCTA
ENSMUSG00000013076	Amotl1	5826	25	80	100	AAGGGTATAGAGATGGGGAATTGGTGAGATCTTCCAGCCCTGAGACCATGTCTGAGCCACCCCAAACTTAGGCTATCTCCCAGCATAGGAGTGAGACACT
ENSMUSG00000013076	Amotl1	5826	25	81	100	GAGATCTTCCAGCCCTGAGACCATGTCTGAGCCACCCCAAACTTAGGCTATCTCCCAGCATAGGAGTGAGACACTGCCCAGTTTACTCAAATTCTAGTGT
ENSMUSG00000013076	Amotl1	5826	25	82	100	TCTGAGCCACCCCAAACTTAGGCTATCTCCCAGCATAGGAGTGAGACACTGCCCAGTTTACTCAAATTCTAGTGTACGTGTTCCAGACACATTGCACACA
ENSMUSG00000013076	Amotl1	5826	25	83	100	TCTCCCAGCATAGGAGTGAGACACTGCCCAGTTTACTCAAATTCTAGTGTACGTGTTCCAGACACATTGCACACACAGACAGAAAGTCTCCTGTTCCAGC
ENSMUSG00000013076	Amotl1	5826	25	84	100	GCCCAGTTTACTCAAATTCTAGTGTACGTGTTCCAGACACATTGCACACACAGACAGAAAGTCTCCTGTTCCAGCCCCCTGCCTCCCTGCGTTGTCAGTC
ENSMUSG00000013076	Amotl1	5826	25	85	100	ACGTGTTCCAGACACATTGCACACACAGACAGAAAGTCTCCTGTTCCAGCCCCCTGCCTCCCTGCGTTGTCAGTCTGTTTCAGTTGTCTGAAAACAAAGG
ENSMUSG00000013076	Amotl1	5826	25	86	100	CAGACAGAAAGTCTCCTGTTCCAGCCCCCTGCCTCCCTGCGTTGTCAGTCTGTTTCAGTTGTCTGAAAACAAAGGGGACACAGACCAGGGCTTTAACTGC
ENSMUSG00000013076	Amotl1	5826	25	87	100	CCCCTGCCTCCCTGCGTTGTCAGTCTGTTTCAGTTGTCTGAAAACAAAGGGGACACAGACCAGGGCTTTAACTGCAAGTGAACTGTGGCTTTTGTTCAAG
ENSMUSG00000013076	Amotl1	5826	25	88	100	TGTTTCAGTTGTCTGAAAACAAAGGGGACACAGACCAGGGCTTTAACTGCAAGTGAACTGTGGCTTTTGTTCAAGAGTCCGTGTTGAGAGAGATGGGCTA
ENSMUSG00000013076	Amotl1	5826	25	89	100	GGACACAGACCAGGGCTTTAACTGCAAGTGAACTGTGGCTTTTGTTCAAGAGTCCGTGTTGAGAGAGATGGGCTATGGGCTTTCAGATAGAGGCCCTTCA
ENSMUSG00000013076	Amotl1	5826	25	90	100	AAGTGAACTGTGGCTTTTGTTCAAGAGTCCGTGTTGAGAGAGATGGGCTATGGGCTTTCAGATAGAGGCCCTTCAGTCTTCTGTCCTTGTAATTCTCTTG
ENSMUSG00000013076	Amotl1	5826	25	91	100	AGTCCGTGTTGAGAGAGATGGGCTATGGGCTTTCAGATAGAGGCCCTTCAGTCTTCTGTCCTTGTAATTCTCTTGAAGGGTGCATGATAGAGGAGCCCCA
ENSMUSG00000013076	Amotl1	5826	25	92	100	TGGGCTTTCAGATAGAGGCCCTTCAGTCTTCTGTCCTTGTAATTCTCTTGAAGGGTGCATGATAGAGGAGCCCCAGGCACTCGGGAGCCTCGCTGTGCTC
ENSMUSG00000013076	Amotl1	5826	25	93	100	GTCTTCTGTCCTTGTAATTCTCTTGAAGGGTGCATGATAGAGGAGCCCCAGGCACTCGGGAGCCTCGCTGTGCTCTGGGGAGTTCATGGGATCTAAACTC
ENSMUSG00000013076	Amotl1	5826	25	94	100	AAGGGTGCATGATAGAGGAGCCCCAGGCACTCGGGAGCCTCGCTGTGCTCTGGGGAGTTCATGGGATCTAAACTCTTTCGACACCAAACAACAGTACTAC
ENSMUSG00000013076	Amotl1	5826	25	95	100	GGCACTCGGGAGCCTCGCTGTGCTCTGGGGAGTTCATGGGATCTAAACTCTTTCGACACCAAACAACAGTACTACATAGGTATTTTGGTACAAACTGAAA
ENSMUSG00000013076	Amotl1	5826	25	96	100	TGGGGAGTTCATGGGATCTAAACTCTTTCGACACCAAACAACAGTACTACATAGGTATTTTGGTACAAACTGAAAGCACTAGAAAAAGTGCCTGTTGAAT
ENSMUSG00000013076	Amotl1	5826	25	97	100	TTTCGACACCAAACAACAGTACTACATAGGTATTTTGGTACAAACTGAAAGCACTAGAAAAAGTGCCTGTTGAATGGTCCTCAAAGCACCAGAGAAACGA
ENSMUSG00000013076	Amotl1	5826	25	98	100	ATAGGTATTTTGGTACAAACTGAAAGCACTAGAAAAAGTGCCTGTTGAATGGTCCTCAAAGCACCAGAGAAACGAGGCCAGGTTCTCCCTCCTGGTTGTT
ENSMUSG00000013076	Amotl1	5826	25	99	100	GCACTAGAAAAAGTGCCTGTTGAATGGTCCTCAAAGCACCAGAGAAACGAGGCCAGGTTCTCCCTCCTGGTTGTTCAGATGCAGAAGCTGGACCCAGGAG
ENSMUSG00000013076	Amotl1	5826	25	100	100	GGTCCTCAAAGCACCAGAGAAACGAGGCCAGGTTCTCCCTCCTGGTTGTTCAGATGCAGAAGCTGGACCCAGGAGGCATACAGCCCATCTCCAAGCTTCA
ENSMUSG00000013076	Amotl1	5826	25	101	100	GGCCAGGTTCTCCCTCCTGGTTGTTCAGATGCAGAAGCTGGACCCAGGAGGCATACAGCCCATCTCCAAGCTTCACTTAAAGCAAAGACTCAGAACAAGA
ENSMUSG00000013076	Amotl1	5826	25	102	100	CAGATGCAGAAGCTGGACCCAGGAGGCATACAGCCCATCTCCAAGCTTCACTTAAAGCAAAGACTCAGAACAAGAGGCTCAGTCACAGGCTGCACGGCCT
ENSMUSG00000013076	Amotl1	5826	25	103	100	GCATACAGCCCATCTCCAAGCTTCACTTAAAGCAAAGACTCAGAACAAGAGGCTCAGTCACAGGCTGCACGGCCTTGAACATGCGCAGCGCTATGCCTGG
ENSMUSG00000013076	Amotl1	5826	25	104	100	CTTAAAGCAAAGACTCAGAACAAGAGGCTCAGTCACAGGCTGCACGGCCTTGAACATGCGCAGCGCTATGCCTGGTGCTCTGTGGCCCAATTTGTGATAC
ENSMUSG00000013076	Amotl1	5826	25	105	100	GGCTCAGTCACAGGCTGCACGGCCTTGAACATGCGCAGCGCTATGCCTGGTGCTCTGTGGCCCAATTTGTGATACTTGTGTGCACACAGGGAAGCTGTCA
ENSMUSG00000013076	Amotl1	5826	25	106	100	TGAACATGCGCAGCGCTATGCCTGGTGCTCTGTGGCCCAATTTGTGATACTTGTGTGCACACAGGGAAGCTGTCACACCTCTCAGGGCCTGAAAACAGGA
ENSMUSG00000013076	Amotl1	5826	25	107	100	TGCTCTGTGGCCCAATTTGTGATACTTGTGTGCACACAGGGAAGCTGTCACACCTCTCAGGGCCTGAAAACAGGACTAAACCCAAGCCTCATATAACTAA
ENSMUSG00000013076	Amotl1	5826	25	108	100	TTGTGTGCACACAGGGAAGCTGTCACACCTCTCAGGGCCTGAAAACAGGACTAAACCCAAGCCTCATATAACTAACCACACCGCCACCATCCACAGGCGT
ENSMUSG00000013076	Amotl1	5826	25	109	100	CACCTCTCAGGGCCTGAAAACAGGACTAAACCCAAGCCTCATATAACTAACCACACCGCCACCATCCACAGGCGTGGATGGAAGTCTTCATGTTCTGTTA
ENSMUSG00000013076	Amotl1	5826	25	110	100	CTAAACCCAAGCCTCATATAACTAACCACACCGCCACCATCCACAGGCGTGGATGGAAGTCTTCATGTTCTGTTATAAGCACAACTACAAAGCAAATTAA
ENSMUSG00000013076	Amotl1	5826	25	111	100	CCACACCGCCACCATCCACAGGCGTGGATGGAAGTCTTCATGTTCTGTTATAAGCACAACTACAAAGCAAATTAAAAAAATAAATAAATAAAAGTCCTTC
ENSMUSG00000013076	Amotl1	5826	25	112	100	GGATGGAAGTCTTCATGTTCTGTTATAAGCACAACTACAAAGCAAATTAAAAAAATAAATAAATAAAAGTCCTTCCTCATAGTGCAGAAGGCTCGTTTTC
ENSMUSG00000013076	Amotl1	5826	25	113	100	TAAGCACAACTACAAAGCAAATTAAAAAAATAAATAAATAAAAGTCCTTCCTCATAGTGCAGAAGGCTCGTTTTCAGATCTCTTGGAGCATTTGATCATA
ENSMUSG00000013076	Amotl1	5826	25	114	100	AAAAATAAATAAATAAAAGTCCTTCCTCATAGTGCAGAAGGCTCGTTTTCAGATCTCTTGGAGCATTTGATCATAGAACTTGAGGGTCTTCTCTTGGGAT
ENSMUSG00000013076	Amotl1	5826	25	115	100	CTCATAGTGCAGAAGGCTCGTTTTCAGATCTCTTGGAGCATTTGATCATAGAACTTGAGGGTCTTCTCTTGGGATAAAGAAAGGATAAATAAAGGCTGTG
ENSMUSG00000013076	Amotl1	5826	25	116	100	AGATCTCTTGGAGCATTTGATCATAGAACTTGAGGGTCTTCTCTTGGGATAAAGAAAGGATAAATAAAGGCTGTGGCACTTAGTGGTGGTTGGCCAGCAT
ENSMUSG00000013076	Amotl1	5826	25	117	100	GAACTTGAGGGTCTTCTCTTGGGATAAAGAAAGGATAAATAAAGGCTGTGGCACTTAGTGGTGGTTGGCCAGCATCCTGCTTTGTCCTTGAGTGAGCAGT
ENSMUSG00000013076	Amotl1	5826	25	118	100	AAAGAAAGGATAAATAAAGGCTGTGGCACTTAGTGGTGGTTGGCCAGCATCCTGCTTTGTCCTTGAGTGAGCAGTGTGGTGATGTCTGAATACTTCCAGG
ENSMUSG00000013076	Amotl1	5826	25	119	100	GCACTTAGTGGTGGTTGGCCAGCATCCTGCTTTGTCCTTGAGTGAGCAGTGTGGTGATGTCTGAATACTTCCAGGTGTCGTGTGGAACCTGAGAAGTATT
ENSMUSG00000013076	Amotl1	5826	25	120	100	CCTGCTTTGTCCTTGAGTGAGCAGTGTGGTGATGTCTGAATACTTCCAGGTGTCGTGTGGAACCTGAGAAGTATTGAGATCATGTCTCTGTCCCTGTGGT
ENSMUSG00000013076	Amotl1	5826	25	121	100	GTGGTGATGTCTGAATACTTCCAGGTGTCGTGTGGAACCTGAGAAGTATTGAGATCATGTCTCTGTCCCTGTGGTTTCAGTAAGTAGATTCTTCTATGTG
ENSMUSG00000013076	Amotl1	5826	25	122	100	TGTCGTGTGGAACCTGAGAAGTATTGAGATCATGTCTCTGTCCCTGTGGTTTCAGTAAGTAGATTCTTCTATGTGTAAGCACTATTTCTCTCTGGAGGTT
ENSMUSG00000013076	Amotl1	5826	25	123	100	GAGATCATGTCTCTGTCCCTGTGGTTTCAGTAAGTAGATTCTTCTATGTGTAAGCACTATTTCTCTCTGGAGGTTCATAGCACTAAGCTGCCAAGAAAAA
ENSMUSG00000013076	Amotl1	5826	25	124	100	TTCAGTAAGTAGATTCTTCTATGTGTAAGCACTATTTCTCTCTGGAGGTTCATAGCACTAAGCTGCCAAGAAAAACACGTTCATTTGCAAAGAATTAAGA
ENSMUSG00000013076	Amotl1	5826	25	125	100	TAAGCACTATTTCTCTCTGGAGGTTCATAGCACTAAGCTGCCAAGAAAAACACGTTCATTTGCAAAGAATTAAGAGTGTGTGCTAAACACTTGACATTGT
ENSMUSG00000013076	Amotl1	5826	25	126	100	CATAGCACTAAGCTGCCAAGAAAAACACGTTCATTTGCAAAGAATTAAGAGTGTGTGCTAAACACTTGACATTGTTCTTTGTTTCTCAGAAGCTAGTGAC
ENSMUSG00000013076	Amotl1	5826	25	127	100	CACGTTCATTTGCAAAGAATTAAGAGTGTGTGCTAAACACTTGACATTGTTCTTTGTTTCTCAGAAGCTAGTGACCAGCAACGTGGAGTGTTCAGCAAGT
ENSMUSG00000013076	Amotl1	5826	25	128	100	GTGTGTGCTAAACACTTGACATTGTTCTTTGTTTCTCAGAAGCTAGTGACCAGCAACGTGGAGTGTTCAGCAAGTCCCCACCATGCCTGCAGGGTGGGGC
ENSMUSG00000013076	Amotl1	5826	25	129	100	TCTTTGTTTCTCAGAAGCTAGTGACCAGCAACGTGGAGTGTTCAGCAAGTCCCCACCATGCCTGCAGGGTGGGGCTGCTCCCTTCCACACCCAGCTTTCC
ENSMUSG00000013076	Amotl1	5826	25	130	100	CAGCAACGTGGAGTGTTCAGCAAGTCCCCACCATGCCTGCAGGGTGGGGCTGCTCCCTTCCACACCCAGCTTTCCTTAGGGGTGGAGACAGGGAATGGTG
ENSMUSG00000013076	Amotl1	5826	25	131	100	CCCCACCATGCCTGCAGGGTGGGGCTGCTCCCTTCCACACCCAGCTTTCCTTAGGGGTGGAGACAGGGAATGGTGGGACCTGTGTTGTTCCGTCCCGCAG
ENSMUSG00000013076	Amotl1	5826	25	132	100	TGCTCCCTTCCACACCCAGCTTTCCTTAGGGGTGGAGACAGGGAATGGTGGGACCTGTGTTGTTCCGTCCCGCAGAGGTCTCTCTTTGGAGCCCATGTAT
ENSMUSG00000013076	Amotl1	5826	25	133	100	TTAGGGGTGGAGACAGGGAATGGTGGGACCTGTGTTGTTCCGTCCCGCAGAGGTCTCTCTTTGGAGCCCATGTATAAGGCTTGACATTTTTCTGTGAGTA
ENSMUSG00000013076	Amotl1	5826	25	134	100	GGACCTGTGTTGTTCCGTCCCGCAGAGGTCTCTCTTTGGAGCCCATGTATAAGGCTTGACATTTTTCTGTGAGTAGATTTAGAGGCAGTTGTTCCAAGTG
ENSMUSG00000013076	Amotl1	5826	25	135	100	AGGTCTCTCTTTGGAGCCCATGTATAAGGCTTGACATTTTTCTGTGAGTAGATTTAGAGGCAGTTGTTCCAAGTGAATTCTGGCCTCAGTACAAAGAATC
ENSMUSG00000013076	Amotl1	5826	25	136	100	AAGGCTTGACATTTTTCTGTGAGTAGATTTAGAGGCAGTTGTTCCAAGTGAATTCTGGCCTCAGTACAAAGAATCCAGTGGTTCTGACACTCGGGACAAA
ENSMUSG00000013076	Amotl1	5826	25	137	100	GATTTAGAGGCAGTTGTTCCAAGTGAATTCTGGCCTCAGTACAAAGAATCCAGTGGTTCTGACACTCGGGACAAAAGCTCTGGTATCCCCTGTAGAGAGG
ENSMUSG00000013076	Amotl1	5826	25	138	100	AATTCTGGCCTCAGTACAAAGAATCCAGTGGTTCTGACACTCGGGACAAAAGCTCTGGTATCCCCTGTAGAGAGGCTCTGTCCTGCTTTGCTCCAGCCAC
ENSMUSG00000013076	Amotl1	5826	25	139	100	CAGTGGTTCTGACACTCGGGACAAAAGCTCTGGTATCCCCTGTAGAGAGGCTCTGTCCTGCTTTGCTCCAGCCACTCACACATAGTTAATAAAGTGGCTG
ENSMUSG00000013076	Amotl1	5826	25	140	100	AGCTCTGGTATCCCCTGTAGAGAGGCTCTGTCCTGCTTTGCTCCAGCCACTCACACATAGTTAATAAAGTGGCTGAAGCTCCTCCCTTCCCAGAGCTGCT
ENSMUSG00000013076	Amotl1	5826	25	141	100	CTCTGTCCTGCTTTGCTCCAGCCACTCACACATAGTTAATAAAGTGGCTGAAGCTCCTCCCTTCCCAGAGCTGCTGTGCTGGGGACGCTGTCTGCAGCCC
ENSMUSG00000013076	Amotl1	5826	25	142	100	TCACACATAGTTAATAAAGTGGCTGAAGCTCCTCCCTTCCCAGAGCTGCTGTGCTGGGGACGCTGTCTGCAGCCCGCCCGAGTCCCAGAGATTGGTGTGA
ENSMUSG00000013076	Amotl1	5826	25	143	100	AAGCTCCTCCCTTCCCAGAGCTGCTGTGCTGGGGACGCTGTCTGCAGCCCGCCCGAGTCCCAGAGATTGGTGTGAGCAGTCAGATAAGGCTGATCTGGGA
ENSMUSG00000013076	Amotl1	5826	25	144	100	GTGCTGGGGACGCTGTCTGCAGCCCGCCCGAGTCCCAGAGATTGGTGTGAGCAGTCAGATAAGGCTGATCTGGGAGACGGAGGAGGTGGCCATGACACAA
ENSMUSG00000013076	Amotl1	5826	25	145	100	GCCCGAGTCCCAGAGATTGGTGTGAGCAGTCAGATAAGGCTGATCTGGGAGACGGAGGAGGTGGCCATGACACAAGGTGTTGTCAGGAGAAGATGATTGT
ENSMUSG00000013076	Amotl1	5826	25	146	100	GCAGTCAGATAAGGCTGATCTGGGAGACGGAGGAGGTGGCCATGACACAAGGTGTTGTCAGGAGAAGATGATTGTGACACAAGGTGTTGTCAGGAGGAGA
ENSMUSG00000013076	Amotl1	5826	25	147	100	GACGGAGGAGGTGGCCATGACACAAGGTGTTGTCAGGAGAAGATGATTGTGACACAAGGTGTTGTCAGGAGGAGATGACTGTGACACAAGGTGTCTTCAA
ENSMUSG00000013076	Amotl1	5826	25	148	100	GGTGTTGTCAGGAGAAGATGATTGTGACACAAGGTGTTGTCAGGAGGAGATGACTGTGACACAAGGTGTCTTCAAGCAGCTCCTTTGTGAGTAGGCTGCA
ENSMUSG00000013076	Amotl1	5826	25	149	100	GACACAAGGTGTTGTCAGGAGGAGATGACTGTGACACAAGGTGTCTTCAAGCAGCTCCTTTGTGAGTAGGCTGCAGAGAGCCATCCTGAGTGGGAGGTTG
ENSMUSG00000013076	Amotl1	5826	25	150	100	TGACTGTGACACAAGGTGTCTTCAAGCAGCTCCTTTGTGAGTAGGCTGCAGAGAGCCATCCTGAGTGGGAGGTTGTGTTGTTTAAACACATGGTGTCTTC
ENSMUSG00000013076	Amotl1	5826	25	151	100	GCAGCTCCTTTGTGAGTAGGCTGCAGAGAGCCATCCTGAGTGGGAGGTTGTGTTGTTTAAACACATGGTGTCTTCTTTGTCTGCACTGGATGGAGCAGGG
ENSMUSG00000013076	Amotl1	5826	25	152	100	GAGAGCCATCCTGAGTGGGAGGTTGTGTTGTTTAAACACATGGTGTCTTCTTTGTCTGCACTGGATGGAGCAGGGTTTGTTTCTATGTGTTCTCCAGGTG
ENSMUSG00000013076	Amotl1	5826	25	153	100	TGTTGTTTAAACACATGGTGTCTTCTTTGTCTGCACTGGATGGAGCAGGGTTTGTTTCTATGTGTTCTCCAGGTGAGCTCACACCCTCTTTAAGAAAAGG
ENSMUSG00000013076	Amotl1	5826	25	154	100	TTTGTCTGCACTGGATGGAGCAGGGTTTGTTTCTATGTGTTCTCCAGGTGAGCTCACACCCTCTTTAAGAAAAGGGGTCTTGTGGATGTTGGAAGCAAGG
ENSMUSG00000013076	Amotl1	5826	25	155	100	TTTGTTTCTATGTGTTCTCCAGGTGAGCTCACACCCTCTTTAAGAAAAGGGGTCTTGTGGATGTTGGAAGCAAGGTCTGTCAAACATTCTTAAATGGTGA
ENSMUSG00000013076	Amotl1	5826	25	156	100	AGCTCACACCCTCTTTAAGAAAAGGGGTCTTGTGGATGTTGGAAGCAAGGTCTGTCAAACATTCTTAAATGGTGATGCTAGAGAAAAGCGAGCCCCCTGT
ENSMUSG00000013076	Amotl1	5826	25	157	100	GGTCTTGTGGATGTTGGAAGCAAGGTCTGTCAAACATTCTTAAATGGTGATGCTAGAGAAAAGCGAGCCCCCTGTAACTTCCCTAAAAGCCGACTCAGCC
ENSMUSG00000013076	Amotl1	5826	25	158	100	TCTGTCAAACATTCTTAAATGGTGATGCTAGAGAAAAGCGAGCCCCCTGTAACTTCCCTAAAAGCCGACTCAGCCACTAAGTATACATGTTGACTTTCTT
ENSMUSG00000013076	Amotl1	5826	25	159	100	TGCTAGAGAAAAGCGAGCCCCCTGTAACTTCCCTAAAAGCCGACTCAGCCACTAAGTATACATGTTGACTTTCTTCTACTTTTTTTCTAGTTAATCAGTG
ENSMUSG00000013076	Amotl1	5826	25	160	100	AACTTCCCTAAAAGCCGACTCAGCCACTAAGTATACATGTTGACTTTCTTCTACTTTTTTTCTAGTTAATCAGTGTGATTTAAATGTCTTTAGCTGATGT
ENSMUSG00000013076	Amotl1	5826	25	161	100	ACTAAGTATACATGTTGACTTTCTTCTACTTTTTTTCTAGTTAATCAGTGTGATTTAAATGTCTTTAGCTGATGTGAGGACTTTTTAAAAGGCAGTAGTT
ENSMUSG00000013076	Amotl1	5826	25	162	100	CTACTTTTTTTCTAGTTAATCAGTGTGATTTAAATGTCTTTAGCTGATGTGAGGACTTTTTAAAAGGCAGTAGTTTGTGGTGCAGCTCCGTGGAACAGGT
ENSMUSG00000013076	Amotl1	5826	25	163	100	TGATTTAAATGTCTTTAGCTGATGTGAGGACTTTTTAAAAGGCAGTAGTTTGTGGTGCAGCTCCGTGGAACAGGTTGTGTAATAAGAAACCTCAGAAGCC
ENSMUSG00000013076	Amotl1	5826	25	164	100	GAGGACTTTTTAAAAGGCAGTAGTTTGTGGTGCAGCTCCGTGGAACAGGTTGTGTAATAAGAAACCTCAGAAGCCAGGCTTCAAGGGGGCCGGGTGTGTG
ENSMUSG00000013076	Amotl1	5826	25	165	100	TGTGGTGCAGCTCCGTGGAACAGGTTGTGTAATAAGAAACCTCAGAAGCCAGGCTTCAAGGGGGCCGGGTGTGTGTGTGTGTGCGGGGTGCACCCAGGCC
ENSMUSG00000013076	Amotl1	5826	25	166	100	TGTGTAATAAGAAACCTCAGAAGCCAGGCTTCAAGGGGGCCGGGTGTGTGTGTGTGTGCGGGGTGCACCCAGGCCAGCCTTTCAGTGGATTCCTATTCTC
ENSMUSG00000013076	Amotl1	5826	25	167	100	AGGCTTCAAGGGGGCCGGGTGTGTGTGTGTGTGCGGGGTGCACCCAGGCCAGCCTTTCAGTGGATTCCTATTCTCATTTAGTAATTGAATGGTATATTAC
ENSMUSG00000013076	Amotl1	5826	25	168	100	TGTGTGTGCGGGGTGCACCCAGGCCAGCCTTTCAGTGGATTCCTATTCTCATTTAGTAATTGAATGGTATATTACATTATATGTAAGTGCATACATATAA
ENSMUSG00000013076	Amotl1	5826	25	169	100	AGCCTTTCAGTGGATTCCTATTCTCATTTAGTAATTGAATGGTATATTACATTATATGTAAGTGCATACATATAAGGTGGAATTTTTCTCAATATAAAAA
ENSMUSG00000013076	Amotl1	5826	25	170	100	ATTTAGTAATTGAATGGTATATTACATTATATGTAAGTGCATACATATAAGGTGGAATTTTTCTCAATATAAAAAAAGAAAGAAAGAAAGAAAGAAAGAA
ENSMUSG00000013076	Amotl1	5826	25	171	100	ATTATATGTAAGTGCATACATATAAGGTGGAATTTTTCTCAATATAAAAAAAGAAAGAAAGAAAGAAAGAAAGAAAGAAAGAAAGAAAGAGAAAAAGAAA
ENSMUSG00000013076	Amotl1	5826	25	172	100	GGTGGAATTTTTCTCAATATAAAAAAAGAAAGAAAGAAAGAAAGAAAGAAAGAAAGAAAGAAAGAGAAAAAGAAAGAAAGAAATGTAAGAAAGAGAAAGA
ENSMUSG00000013076	Amotl1	5826	25	173	100	AAGAAAGAAAGAAAGAAAGAAAGAAAGAAAGAAAGAAAGAGAAAAAGAAAGAAAGAAATGTAAGAAAGAGAAAGAAATCCTTTTGTTTTCCTGTGAGCTC
ENSMUSG00000013076	Amotl1	5826	25	174	100	AGAAAGAAAGAAAGAGAAAAAGAAAGAAAGAAATGTAAGAAAGAGAAAGAAATCCTTTTGTTTTCCTGTGAGCTCGCTCCTTGGGGAGGACTACAGGGCT
ENSMUSG00000013076	Amotl1	5826	25	175	100	GAAAGAAATGTAAGAAAGAGAAAGAAATCCTTTTGTTTTCCTGTGAGCTCGCTCCTTGGGGAGGACTACAGGGCTCCCCATGTAAAATGGCTGTTGACTC
ENSMUSG00000013076	Amotl1	5826	25	176	100	AATCCTTTTGTTTTCCTGTGAGCTCGCTCCTTGGGGAGGACTACAGGGCTCCCCATGTAAAATGGCTGTTGACTCCTCTAGCACAATGGCCTCCAAGGTC
ENSMUSG00000013076	Amotl1	5826	25	177	100	GCTCCTTGGGGAGGACTACAGGGCTCCCCATGTAAAATGGCTGTTGACTCCTCTAGCACAATGGCCTCCAAGGTCTGGCCTGCTCCTCGGATTCCCTTTG
ENSMUSG00000013076	Amotl1	5826	25	178	100	CCCCATGTAAAATGGCTGTTGACTCCTCTAGCACAATGGCCTCCAAGGTCTGGCCTGCTCCTCGGATTCCCTTTGAAGTGAGAGGTCATTGTCTTTTGAG
ENSMUSG00000013076	Amotl1	5826	25	179	100	CTCTAGCACAATGGCCTCCAAGGTCTGGCCTGCTCCTCGGATTCCCTTTGAAGTGAGAGGTCATTGTCTTTTGAGAATGGATTTAAGTTTTGAAAATAGC
ENSMUSG00000013076	Amotl1	5826	25	180	100	TGGCCTGCTCCTCGGATTCCCTTTGAAGTGAGAGGTCATTGTCTTTTGAGAATGGATTTAAGTTTTGAAAATAGCCCACATTGTTCCAGCACAAGGGAAC
ENSMUSG00000013076	Amotl1	5826	25	181	100	AAGTGAGAGGTCATTGTCTTTTGAGAATGGATTTAAGTTTTGAAAATAGCCCACATTGTTCCAGCACAAGGGAACGAACATAGGGCAACTAGTCAGAATC
ENSMUSG00000013076	Amotl1	5826	25	182	100	AATGGATTTAAGTTTTGAAAATAGCCCACATTGTTCCAGCACAAGGGAACGAACATAGGGCAACTAGTCAGAATCAGAACCCCAGGGCCATCAGATGACT
ENSMUSG00000013076	Amotl1	5826	25	183	100	CCACATTGTTCCAGCACAAGGGAACGAACATAGGGCAACTAGTCAGAATCAGAACCCCAGGGCCATCAGATGACTTGGTGAAAAGGCACTTCCACCAAAG
ENSMUSG00000013076	Amotl1	5826	25	184	100	GAACATAGGGCAACTAGTCAGAATCAGAACCCCAGGGCCATCAGATGACTTGGTGAAAAGGCACTTCCACCAAAGCCAAGACCTGAGTTTGATCCCCAGG
ENSMUSG00000013076	Amotl1	5826	25	185	100	AGAACCCCAGGGCCATCAGATGACTTGGTGAAAAGGCACTTCCACCAAAGCCAAGACCTGAGTTTGATCCCCAGGAACCCCATAGTAGGAGAGAGCCAAC
ENSMUSG00000013076	Amotl1	5826	25	186	100	TGGTGAAAAGGCACTTCCACCAAAGCCAAGACCTGAGTTTGATCCCCAGGAACCCCATAGTAGGAGAGAGCCAACTGCAGCAAGTTGTCCTCTGACTCAG
ENSMUSG00000013076	Amotl1	5826	25	187	100	CCAAGACCTGAGTTTGATCCCCAGGAACCCCATAGTAGGAGAGAGCCAACTGCAGCAAGTTGTCCTCTGACTCAGACACACACACACACACACACACACA
ENSMUSG00000013076	Amotl1	5826	25	188	100	AACCCCATAGTAGGAGAGAGCCAACTGCAGCAAGTTGTCCTCTGACTCAGACACACACACACACACACACACACACACACACACACACGCGCGCGCACGC
ENSMUSG00000013076	Amotl1	5826	25	189	100	TGCAGCAAGTTGTCCTCTGACTCAGACACACACACACACACACACACACACACACACACACACGCGCGCGCACGCGCGCGCACATACATACACATGCACA
ENSMUSG00000013076	Amotl1	5826	25	190	100	ACACACACACACACACACACACACACACACACACACACGCGCGCGCACGCGCGCGCACATACATACACATGCACACACACACTTACATGCACACACATGA
ENSMUSG00000013076	Amotl1	5826	25	191	100	CACACACACACACGCGCGCGCACGCGCGCGCACATACATACACATGCACACACACACTTACATGCACACACATGAACATGCACATGCACACACACACATG
ENSMUSG00000013076	Amotl1	5826	25	192	100	GCGCGCACATACATACACATGCACACACACACTTACATGCACACACATGAACATGCACATGCACACACACACATGCATACATACATACACATGCACACAC
ENSMUSG00000013076	Amotl1	5826	25	193	100	CACACACTTACATGCACACACATGAACATGCACATGCACACACACACATGCATACATACATACACATGCACACACACATATATGCACACACATGAACATG
ENSMUSG00000013076	Amotl1	5826	25	194	100	ACATGCACATGCACACACACACATGCATACATACATACACATGCACACACACATATATGCACACACATGAACATGCACACACACATACATGCACACACAC
ENSMUSG00000013076	Amotl1	5826	25	195	100	CATACATACATACACATGCACACACACATATATGCACACACATGAACATGCACACACACATACATGCACACACACATACATGCACACACATGCACACGCA
ENSMUSG00000013076	Amotl1	5826	25	196	100	ACATATATGCACACACATGAACATGCACACACACATACATGCACACACACATACATGCACACACATGCACACGCACACACTCGTGCGCACACACAGTTTT
ENSMUSG00000013076	Amotl1	5826	25	197	100	CACACACACATACATGCACACACACATACATGCACACACATGCACACGCACACACTCGTGCGCACACACAGTTTTTAGAAGACTACCTAATGTGTAGGAA
ENSMUSG00000013076	Amotl1	5826	25	198	100	ATACATGCACACACATGCACACGCACACACTCGTGCGCACACACAGTTTTTAGAAGACTACCTAATGTGTAGGAAAAGGGTTATTAGTACCTGCAACCTC
ENSMUSG00000013076	Amotl1	5826	25	199	100	CACACTCGTGCGCACACACAGTTTTTAGAAGACTACCTAATGTGTAGGAAAAGGGTTATTAGTACCTGCAACCTCTAGGGCCTCGTTTTCAAGCCCGCTT
ENSMUSG00000013076	Amotl1	5826	25	200	100	TAGAAGACTACCTAATGTGTAGGAAAAGGGTTATTAGTACCTGCAACCTCTAGGGCCTCGTTTTCAAGCCCGCTTCTCTCTCCAGGCTTCATATGTGTGC
ENSMUSG00000013076	Amotl1	5826	25	201	100	AAGGGTTATTAGTACCTGCAACCTCTAGGGCCTCGTTTTCAAGCCCGCTTCTCTCTCCAGGCTTCATATGTGTGCAACCCCTGCATACACTACAGACCTA
ENSMUSG00000013076	Amotl1	5826	25	202	100	TAGGGCCTCGTTTTCAAGCCCGCTTCTCTCTCCAGGCTTCATATGTGTGCAACCCCTGCATACACTACAGACCTAAGTACATATAAATATGAACAGCCAA
ENSMUSG00000013076	Amotl1	5826	25	203	100	CTCTCTCCAGGCTTCATATGTGTGCAACCCCTGCATACACTACAGACCTAAGTACATATAAATATGAACAGCCAATAGGTACTCTGTAAAATGGATATTC
ENSMUSG00000013076	Amotl1	5826	25	204	100	AACCCCTGCATACACTACAGACCTAAGTACATATAAATATGAACAGCCAATAGGTACTCTGTAAAATGGATATTCTTAAGTGCATGTTATTGTTGTGTGT
ENSMUSG00000013076	Amotl1	5826	25	205	100	AGTACATATAAATATGAACAGCCAATAGGTACTCTGTAAAATGGATATTCTTAAGTGCATGTTATTGTTGTGTGTGCCGTGACTGAGGTGTGTGTTCGTC
ENSMUSG00000013076	Amotl1	5826	25	206	100	TAGGTACTCTGTAAAATGGATATTCTTAAGTGCATGTTATTGTTGTGTGTGCCGTGACTGAGGTGTGTGTTCGTCATGAGACTTTGCTTCTTAGCTGAAT
ENSMUSG00000013076	Amotl1	5826	25	207	100	TTAAGTGCATGTTATTGTTGTGTGTGCCGTGACTGAGGTGTGTGTTCGTCATGAGACTTTGCTTCTTAGCTGAATTAAGACTCTGCCCTCCCTCCGAGGC
ENSMUSG00000013076	Amotl1	5826	25	208	100	GCCGTGACTGAGGTGTGTGTTCGTCATGAGACTTTGCTTCTTAGCTGAATTAAGACTCTGCCCTCCCTCCGAGGCAGGAAATAGGCTGCAGCTTCTGGAA
ENSMUSG00000013076	Amotl1	5826	25	209	100	ATGAGACTTTGCTTCTTAGCTGAATTAAGACTCTGCCCTCCCTCCGAGGCAGGAAATAGGCTGCAGCTTCTGGAATCAGCTTCTCACGTTTTCCCGCCTT
ENSMUSG00000013076	Amotl1	5826	25	210	100	TAAGACTCTGCCCTCCCTCCGAGGCAGGAAATAGGCTGCAGCTTCTGGAATCAGCTTCTCACGTTTTCCCGCCTTTGTTGTGTTTACTCGTGGCTTTGTC
ENSMUSG00000013076	Amotl1	5826	25	211	100	AGGAAATAGGCTGCAGCTTCTGGAATCAGCTTCTCACGTTTTCCCGCCTTTGTTGTGTTTACTCGTGGCTTTGTCTGAGAGTCTGTTCTCACATACACAC
ENSMUSG00000013076	Amotl1	5826	25	212	100	TCAGCTTCTCACGTTTTCCCGCCTTTGTTGTGTTTACTCGTGGCTTTGTCTGAGAGTCTGTTCTCACATACACACCTGTAAGTATTTATTACAAGGTAGA
ENSMUSG00000013076	Amotl1	5826	25	213	100	TGTTGTGTTTACTCGTGGCTTTGTCTGAGAGTCTGTTCTCACATACACACCTGTAAGTATTTATTACAAGGTAGAATGGGGACAGGCAGCCACAGTACTT
ENSMUSG00000013076	Amotl1	5826	25	214	100	TGAGAGTCTGTTCTCACATACACACCTGTAAGTATTTATTACAAGGTAGAATGGGGACAGGCAGCCACAGTACTTGTATTTGAATGTTTCCAGGGAGGGA
ENSMUSG00000013076	Amotl1	5826	25	215	100	CTGTAAGTATTTATTACAAGGTAGAATGGGGACAGGCAGCCACAGTACTTGTATTTGAATGTTTCCAGGGAGGGACAATGGAGCCCCCTCCTCAGTGAGG
ENSMUSG00000013076	Amotl1	5826	25	216	100	ATGGGGACAGGCAGCCACAGTACTTGTATTTGAATGTTTCCAGGGAGGGACAATGGAGCCCCCTCCTCAGTGAGGTGCTCACAGAATCTGTGTCAAATTC
ENSMUSG00000013076	Amotl1	5826	25	217	100	GTATTTGAATGTTTCCAGGGAGGGACAATGGAGCCCCCTCCTCAGTGAGGTGCTCACAGAATCTGTGTCAAATTCTGTGAACCAGGGCCAACACTGGTAC
ENSMUSG00000013076	Amotl1	5826	25	218	100	CAATGGAGCCCCCTCCTCAGTGAGGTGCTCACAGAATCTGTGTCAAATTCTGTGAACCAGGGCCAACACTGGTACCAGCTTCACCCTGACCTGGGGCCAC
ENSMUSG00000013076	Amotl1	5826	25	219	100	TGCTCACAGAATCTGTGTCAAATTCTGTGAACCAGGGCCAACACTGGTACCAGCTTCACCCTGACCTGGGGCCACTGCCCTCTCTCTCCACTGCCTTGTG
ENSMUSG00000013076	Amotl1	5826	25	220	100	TGTGAACCAGGGCCAACACTGGTACCAGCTTCACCCTGACCTGGGGCCACTGCCCTCTCTCTCCACTGCCTTGTGTGTGTATAGGTGTGGTTGTGTGTGT
ENSMUSG00000013076	Amotl1	5826	25	221	100	CAGCTTCACCCTGACCTGGGGCCACTGCCCTCTCTCTCCACTGCCTTGTGTGTGTATAGGTGTGGTTGTGTGTGTGTGTCTCTGCTGGGGGCATGTGCCG
ENSMUSG00000013076	Amotl1	5826	25	222	100	TGCCCTCTCTCTCCACTGCCTTGTGTGTGTATAGGTGTGGTTGTGTGTGTGTGTCTCTGCTGGGGGCATGTGCCGCACTTCCCAGCGGACTCTGGTATCC
ENSMUSG00000013076	Amotl1	5826	25	223	100	TGTGTATAGGTGTGGTTGTGTGTGTGTGTCTCTGCTGGGGGCATGTGCCGCACTTCCCAGCGGACTCTGGTATCCATGTGTAACCTTTGGCACCTGTGTT
ENSMUSG00000013076	Amotl1	5826	25	224	100	GTGTCTCTGCTGGGGGCATGTGCCGCACTTCCCAGCGGACTCTGGTATCCATGTGTAACCTTTGGCACCTGTGTTACTGGACTGCATTGACAGGTGGTGT
ENSMUSG00000013076	Amotl1	5826	25	225	100	CACTTCCCAGCGGACTCTGGTATCCATGTGTAACCTTTGGCACCTGTGTTACTGGACTGCATTGACAGGTGGTGTACAGATCTGTACAGATGGGTCTGTG
ENSMUSG00000013076	Amotl1	5826	25	226	100	ATGTGTAACCTTTGGCACCTGTGTTACTGGACTGCATTGACAGGTGGTGTACAGATCTGTACAGATGGGTCTGTGTGAAGAGTTGGGGAGTCCCCCCCAC
ENSMUSG00000013076	Amotl1	5826	25	227	100	ACTGGACTGCATTGACAGGTGGTGTACAGATCTGTACAGATGGGTCTGTGTGAAGAGTTGGGGAGTCCCCCCCACAGTGAATATGGATACTGTTGGTCAG
ENSMUSG00000013076	Amotl1	5826	25	228	100	ACAGATCTGTACAGATGGGTCTGTGTGAAGAGTTGGGGAGTCCCCCCCACAGTGAATATGGATACTGTTGGTCAGCCAAAGATTTTCCTATTCTTTGCTG
ENSMUSG00000013076	Amotl1	5826	25	229	100	TGAAGAGTTGGGGAGTCCCCCCCACAGTGAATATGGATACTGTTGGTCAGCCAAAGATTTTCCTATTCTTTGCTGCTTAAACTTTGTGCCTTAATATTGT
ENSMUSG00000013076	Amotl1	5826	25	230	101	AGTGAATATGGATACTGTTGGTCAGCCAAAGATTTTCCTATTCTTTGCTGCTTAAACTTTGTGCCTTAATATTGTAAATAATAAATGTTTAAAACAGCAAA
ENSMUSG00000014294	Ndufa2	235	15	1	75	AGGTCTCCACTGAGGACTGTGAGCGAGAGCAGCTGAACCTGCTGGACTGAAGACAGTGTGGGGAAATGTGTGCTT
ENSMUSG00000014294	Ndufa2	235	15	2	75	ACTGTGAGCGAGAGCAGCTGAACCTGCTGGACTGAAGACAGTGTGGGGAAATGTGTGCTTTGGGTCCTTATAAAG
ENSMUSG00000014294	Ndufa2	235	15	3	75	AGCTGAACCTGCTGGACTGAAGACAGTGTGGGGAAATGTGTGCTTTGGGTCCTTATAAAGCTTACGCTGTACAGT
ENSMUSG00000014294	Ndufa2	235	15	4	75	ACTGAAGACAGTGTGGGGAAATGTGTGCTTTGGGTCCTTATAAAGCTTACGCTGTACAGTGTCCCTTCAGAATGT
ENSMUSG00000014294	Ndufa2	235	15	5	75	GGGAAATGTGTGCTTTGGGTCCTTATAAAGCTTACGCTGTACAGTGTCCCTTCAGAATGTCCTCTTCATTACCTT
ENSMUSG00000014294	Ndufa2	235	15	6	75	TGGGTCCTTATAAAGCTTACGCTGTACAGTGTCCCTTCAGAATGTCCTCTTCATTACCTTCTCCCTCTTACTGCG
ENSMUSG00000014294	Ndufa2	235	15	7	75	CTTACGCTGTACAGTGTCCCTTCAGAATGTCCTCTTCATTACCTTCTCCCTCTTACTGCGCAACACTGAGGCAAA
ENSMUSG00000014294	Ndufa2	235	15	8	75	GTCCCTTCAGAATGTCCTCTTCATTACCTTCTCCCTCTTACTGCGCAACACTGAGGCAAAGTAGTTTTATATAAA
ENSMUSG00000014294	Ndufa2	235	15	9	75	CCTCTTCATTACCTTCTCCCTCTTACTGCGCAACACTGAGGCAAAGTAGTTTTATATAAAAATACTCCTTTATTT
ENSMUSG00000014294	Ndufa2	235	15	10	75	CTCCCTCTTACTGCGCAACACTGAGGCAAAGTAGTTTTATATAAAAATACTCCTTTATTTCTCCTCAAAAAAAAA
ENSMUSG00000014294	Ndufa2	235	15	11	75	CAACACTGAGGCAAAGTAGTTTTATATAAAAATACTCCTTTATTTCTCCTCAAAAAAAAAAAAAAAAAAAACCCA
ENSMUSG00000014294	Ndufa2	235	15	12	70	GTAGTTTTATATAAAAATACTCCTTTATTTCTCCTCAAAAAAAAAAAAAAAAAAAACCCACCAGGTGCCA
ENSMUSG00000014313	Cox6c	137	15	1	75	TTTCAGAATGCAAAGAATTCTTTGGATTGCGCTCCAAAGAAGTTCATTGCTGACCTGCGCTCCTGAACTATGAAA
ENSMUSG00000014313	Cox6c	137	15	2	75	AATTCTTTGGATTGCGCTCCAAAGAAGTTCATTGCTGACCTGCGCTCCTGAACTATGAAACATGAATATGTGTGG
ENSMUSG00000014313	Cox6c	137	15	3	75	GCTCCAAAGAAGTTCATTGCTGACCTGCGCTCCTGAACTATGAAACATGAATATGTGTGGGCTAAGGAATAGTTT
ENSMUSG00000014313	Cox6c	137	15	4	75	ATTGCTGACCTGCGCTCCTGAACTATGAAACATGAATATGTGTGGGCTAAGGAATAGTTTCTTTCAATAAACAGT
ENSMUSG00000014313	Cox6c	137	15	5	77	TCCTGAACTATGAAACATGAATATGTGTGGGCTAAGGAATAGTTTCTTTCAATAAACAGTAATTATATGGACAGTAA
ENSMUSG00000014602	Kif1a	2993	25	1	100	GTTGAAAGCCTTCCGGACTTCCAGTGGCCCAGACCACTCCCCTGTCCTTACCATCTGTTCTGTCATCTGCCACTCAGCCCTTCCCCCCTACCCACCACCA
ENSMUSG00000014602	Kif1a	2993	25	2	100	GGCCCAGACCACTCCCCTGTCCTTACCATCTGTTCTGTCATCTGCCACTCAGCCCTTCCCCCCTACCCACCACCAGGGGACACCTGTGCTGGGCCCAGCA
ENSMUSG00000014602	Kif1a	2993	25	3	100	CCATCTGTTCTGTCATCTGCCACTCAGCCCTTCCCCCCTACCCACCACCAGGGGACACCTGTGCTGGGCCCAGCAACCCTACCTCTGGAGGGAGGCCTAT
ENSMUSG00000014602	Kif1a	2993	25	4	100	AGCCCTTCCCCCCTACCCACCACCAGGGGACACCTGTGCTGGGCCCAGCAACCCTACCTCTGGAGGGAGGCCTATACCACATGACGAATTGTGCTCCCCC
ENSMUSG00000014602	Kif1a	2993	25	5	100	GGGGACACCTGTGCTGGGCCCAGCAACCCTACCTCTGGAGGGAGGCCTATACCACATGACGAATTGTGCTCCCCCCAGAGGTTGTGCGTGTTGTGGTTTC
ENSMUSG00000014602	Kif1a	2993	25	6	100	ACCCTACCTCTGGAGGGAGGCCTATACCACATGACGAATTGTGCTCCCCCCAGAGGTTGTGCGTGTTGTGGTTTCTTCCAAAATTGCTCTGGTGGGAAGT
ENSMUSG00000014602	Kif1a	2993	25	7	100	ACCACATGACGAATTGTGCTCCCCCCAGAGGTTGTGCGTGTTGTGGTTTCTTCCAAAATTGCTCTGGTGGGAAGTTCGGAATGCCAGGAAGGTCAGAGGG
ENSMUSG00000014602	Kif1a	2993	25	8	100	CAGAGGTTGTGCGTGTTGTGGTTTCTTCCAAAATTGCTCTGGTGGGAAGTTCGGAATGCCAGGAAGGTCAGAGGGCCCGAGACCCAGGGTATTGCCGCTG
ENSMUSG00000014602	Kif1a	2993	25	9	100	TTCCAAAATTGCTCTGGTGGGAAGTTCGGAATGCCAGGAAGGTCAGAGGGCCCGAGACCCAGGGTATTGCCGCTGTTCTAATATTTTTTTAAGCATAGAC
ENSMUSG00000014602	Kif1a	2993	25	10	100	TCGGAATGCCAGGAAGGTCAGAGGGCCCGAGACCCAGGGTATTGCCGCTGTTCTAATATTTTTTTAAGCATAGACAGACTTATAATTAATATACATTAGT
ENSMUSG00000014602	Kif1a	2993	25	11	100	CCCGAGACCCAGGGTATTGCCGCTGTTCTAATATTTTTTTAAGCATAGACAGACTTATAATTAATATACATTAGTTAGTGGCGTTGAAACAGTCCTCTGA
ENSMUSG00000014602	Kif1a	2993	25	12	100	TTCTAATATTTTTTTAAGCATAGACAGACTTATAATTAATATACATTAGTTAGTGGCGTTGAAACAGTCCTCTGAGACATTAACTATAAGACTGTGTTCT
ENSMUSG00000014602	Kif1a	2993	25	13	100	AGACTTATAATTAATATACATTAGTTAGTGGCGTTGAAACAGTCCTCTGAGACATTAACTATAAGACTGTGTTCTGTTTATAAGTATTTATTTCTAATGC
ENSMUSG00000014602	Kif1a	2993	25	14	100	TAGTGGCGTTGAAACAGTCCTCTGAGACATTAACTATAAGACTGTGTTCTGTTTATAAGTATTTATTTCTAATGCCTCCAGGTAGGGCTGTAAGGTTCAT
ENSMUSG00000014602	Kif1a	2993	25	15	100	GACATTAACTATAAGACTGTGTTCTGTTTATAAGTATTTATTTCTAATGCCTCCAGGTAGGGCTGTAAGGTTCATGTGGAGCTACCTTCTCCTATCCCCC
ENSMUSG00000014602	Kif1a	2993	25	16	100	GTTTATAAGTATTTATTTCTAATGCCTCCAGGTAGGGCTGTAAGGTTCATGTGGAGCTACCTTCTCCTATCCCCCCTTCAGCCTGGCCCTGTTGGTTCCC
ENSMUSG00000014602	Kif1a	2993	25	17	100	CTCCAGGTAGGGCTGTAAGGTTCATGTGGAGCTACCTTCTCCTATCCCCCCTTCAGCCTGGCCCTGTTGGTTCCCACCTGTATCTCCAGCCTGCAAGGGG
ENSMUSG00000014602	Kif1a	2993	25	18	100	GTGGAGCTACCTTCTCCTATCCCCCCTTCAGCCTGGCCCTGTTGGTTCCCACCTGTATCTCCAGCCTGCAAGGGGCAGAGGGAGGGAGGGACGTGAACAA
ENSMUSG00000014602	Kif1a	2993	25	19	100	CTTCAGCCTGGCCCTGTTGGTTCCCACCTGTATCTCCAGCCTGCAAGGGGCAGAGGGAGGGAGGGACGTGAACAAACCATGGCTCCTCACAGCCTGGCAC
ENSMUSG00000014602	Kif1a	2993	25	20	100	ACCTGTATCTCCAGCCTGCAAGGGGCAGAGGGAGGGAGGGACGTGAACAAACCATGGCTCCTCACAGCCTGGCACAGGGAAACTCCGTCCTGGCCAGTTT
ENSMUSG00000014602	Kif1a	2993	25	21	100	CAGAGGGAGGGAGGGACGTGAACAAACCATGGCTCCTCACAGCCTGGCACAGGGAAACTCCGTCCTGGCCAGTTTTGTCTGAGATGCACCTTGCATGGTA
ENSMUSG00000014602	Kif1a	2993	25	22	100	ACCATGGCTCCTCACAGCCTGGCACAGGGAAACTCCGTCCTGGCCAGTTTTGTCTGAGATGCACCTTGCATGGTACGTGTGTGAGAGGTTGTGCAAGTTC
ENSMUSG00000014602	Kif1a	2993	25	23	100	AGGGAAACTCCGTCCTGGCCAGTTTTGTCTGAGATGCACCTTGCATGGTACGTGTGTGAGAGGTTGTGCAAGTTCTGAGACTTAGACAATTCAGAAGTCA
ENSMUSG00000014602	Kif1a	2993	25	24	100	TGTCTGAGATGCACCTTGCATGGTACGTGTGTGAGAGGTTGTGCAAGTTCTGAGACTTAGACAATTCAGAAGTCACCCTTCTGAGGGAACAGTTCCCAAA
ENSMUSG00000014602	Kif1a	2993	25	25	100	CGTGTGTGAGAGGTTGTGCAAGTTCTGAGACTTAGACAATTCAGAAGTCACCCTTCTGAGGGAACAGTTCCCAAAATGGAGCAATAAAGGTGGTGTGAGC
ENSMUSG00000014602	Kif1a	2993	25	26	100	TGAGACTTAGACAATTCAGAAGTCACCCTTCTGAGGGAACAGTTCCCAAAATGGAGCAATAAAGGTGGTGTGAGCAGTTTCATCTCAGAGCGAGGAGGAT
ENSMUSG00000014602	Kif1a	2993	25	27	100	CCCTTCTGAGGGAACAGTTCCCAAAATGGAGCAATAAAGGTGGTGTGAGCAGTTTCATCTCAGAGCGAGGAGGATCAGGTGAGGGGTATGATCCAACCTC
ENSMUSG00000014602	Kif1a	2993	25	28	100	ATGGAGCAATAAAGGTGGTGTGAGCAGTTTCATCTCAGAGCGAGGAGGATCAGGTGAGGGGTATGATCCAACCTCGCTAGGCAGACTGGCTCCAGCTGAG
ENSMUSG00000014602	Kif1a	2993	25	29	100	AGTTTCATCTCAGAGCGAGGAGGATCAGGTGAGGGGTATGATCCAACCTCGCTAGGCAGACTGGCTCCAGCTGAGCTGTGTCCAGGCTGTTGGGTAGGCG
ENSMUSG00000014602	Kif1a	2993	25	30	100	CAGGTGAGGGGTATGATCCAACCTCGCTAGGCAGACTGGCTCCAGCTGAGCTGTGTCCAGGCTGTTGGGTAGGCGGCTGCGTTTACACACGGCTGTGGGT
ENSMUSG00000014602	Kif1a	2993	25	31	100	GCTAGGCAGACTGGCTCCAGCTGAGCTGTGTCCAGGCTGTTGGGTAGGCGGCTGCGTTTACACACGGCTGTGGGTGACAGAGGCCATGGGTGTTCAGAGT
ENSMUSG00000014602	Kif1a	2993	25	32	100	CTGTGTCCAGGCTGTTGGGTAGGCGGCTGCGTTTACACACGGCTGTGGGTGACAGAGGCCATGGGTGTTCAGAGTGGGGCCTCTGACTGTAGCCTTGGGT
ENSMUSG00000014602	Kif1a	2993	25	33	100	GCTGCGTTTACACACGGCTGTGGGTGACAGAGGCCATGGGTGTTCAGAGTGGGGCCTCTGACTGTAGCCTTGGGTGTCAATGAGCAGAGGAATGGATATG
ENSMUSG00000014602	Kif1a	2993	25	34	100	GACAGAGGCCATGGGTGTTCAGAGTGGGGCCTCTGACTGTAGCCTTGGGTGTCAATGAGCAGAGGAATGGATATGTAGCTCTGGGAAGTTCCGTGATCAG
ENSMUSG00000014602	Kif1a	2993	25	35	100	GGGGCCTCTGACTGTAGCCTTGGGTGTCAATGAGCAGAGGAATGGATATGTAGCTCTGGGAAGTTCCGTGATCAGTGATCCCAGTCTGCCCAGGGGTGGC
ENSMUSG00000014602	Kif1a	2993	25	36	100	GTCAATGAGCAGAGGAATGGATATGTAGCTCTGGGAAGTTCCGTGATCAGTGATCCCAGTCTGCCCAGGGGTGGCGCTCCTGTAAATCTCAGCAAGAGAG
ENSMUSG00000014602	Kif1a	2993	25	37	100	TAGCTCTGGGAAGTTCCGTGATCAGTGATCCCAGTCTGCCCAGGGGTGGCGCTCCTGTAAATCTCAGCAAGAGAGCACAGGAGGGTGACCTCGTGGTGGT
ENSMUSG00000014602	Kif1a	2993	25	38	100	TGATCCCAGTCTGCCCAGGGGTGGCGCTCCTGTAAATCTCAGCAAGAGAGCACAGGAGGGTGACCTCGTGGTGGTCTTGGTAAAGGGACTCTTCTGTACC
ENSMUSG00000014602	Kif1a	2993	25	39	100	GCTCCTGTAAATCTCAGCAAGAGAGCACAGGAGGGTGACCTCGTGGTGGTCTTGGTAAAGGGACTCTTCTGTACCTTCTGTACCTGGGGACTTTTCATAC
ENSMUSG00000014602	Kif1a	2993	25	40	100	CACAGGAGGGTGACCTCGTGGTGGTCTTGGTAAAGGGACTCTTCTGTACCTTCTGTACCTGGGGACTTTTCATACCACTGGTCCATTTGGAAAGCCAGAA
ENSMUSG00000014602	Kif1a	2993	25	41	100	CTTGGTAAAGGGACTCTTCTGTACCTTCTGTACCTGGGGACTTTTCATACCACTGGTCCATTTGGAAAGCCAGAAACCAAACCTCAAGTCCCCAGGACCC
ENSMUSG00000014602	Kif1a	2993	25	42	100	TTCTGTACCTGGGGACTTTTCATACCACTGGTCCATTTGGAAAGCCAGAAACCAAACCTCAAGTCCCCAGGACCCATCAGGAGCAGTTACACTCAGCATC
ENSMUSG00000014602	Kif1a	2993	25	43	100	CACTGGTCCATTTGGAAAGCCAGAAACCAAACCTCAAGTCCCCAGGACCCATCAGGAGCAGTTACACTCAGCATCCAGCTATTCCAGGAATCTCTCTCCA
ENSMUSG00000014602	Kif1a	2993	25	44	100	ACCAAACCTCAAGTCCCCAGGACCCATCAGGAGCAGTTACACTCAGCATCCAGCTATTCCAGGAATCTCTCTCCACCTTGGTCAGCCCCTCCCCCTTCTG
ENSMUSG00000014602	Kif1a	2993	25	45	100	ATCAGGAGCAGTTACACTCAGCATCCAGCTATTCCAGGAATCTCTCTCCACCTTGGTCAGCCCCTCCCCCTTCTGGATCAGCTGATGGATCTAAGCTCCC
ENSMUSG00000014602	Kif1a	2993	25	46	100	CAGCTATTCCAGGAATCTCTCTCCACCTTGGTCAGCCCCTCCCCCTTCTGGATCAGCTGATGGATCTAAGCTCCCCATCAGCTCAGACTGTGTCCACATG
ENSMUSG00000014602	Kif1a	2993	25	47	100	CCTTGGTCAGCCCCTCCCCCTTCTGGATCAGCTGATGGATCTAAGCTCCCCATCAGCTCAGACTGTGTCCACATGGCACTGACATGACCTGGATACTCTT
ENSMUSG00000014602	Kif1a	2993	25	48	100	GATCAGCTGATGGATCTAAGCTCCCCATCAGCTCAGACTGTGTCCACATGGCACTGACATGACCTGGATACTCTTGTGACCAATGTTCACAGCATCCCTA
ENSMUSG00000014602	Kif1a	2993	25	49	100	CATCAGCTCAGACTGTGTCCACATGGCACTGACATGACCTGGATACTCTTGTGACCAATGTTCACAGCATCCCTACTGTCTGGAAGGTCATAGAAGGTTC
ENSMUSG00000014602	Kif1a	2993	25	50	100	GCACTGACATGACCTGGATACTCTTGTGACCAATGTTCACAGCATCCCTACTGTCTGGAAGGTCATAGAAGGTTCTGGCTTCAAGGTCCCTTGGCATAGT
ENSMUSG00000014602	Kif1a	2993	25	51	100	GTGACCAATGTTCACAGCATCCCTACTGTCTGGAAGGTCATAGAAGGTTCTGGCTTCAAGGTCCCTTGGCATAGTTATCAAAGGTCCTGCTCTTTGTCCA
ENSMUSG00000014602	Kif1a	2993	25	52	100	CTGTCTGGAAGGTCATAGAAGGTTCTGGCTTCAAGGTCCCTTGGCATAGTTATCAAAGGTCCTGCTCTTTGTCCAGGCATCAAGATTCAGGGTAGTGGCA
ENSMUSG00000014602	Kif1a	2993	25	53	100	TGGCTTCAAGGTCCCTTGGCATAGTTATCAAAGGTCCTGCTCTTTGTCCAGGCATCAAGATTCAGGGTAGTGGCAGGGCTCATGCTGAAAGTAGTGTGTG
ENSMUSG00000014602	Kif1a	2993	25	54	100	TATCAAAGGTCCTGCTCTTTGTCCAGGCATCAAGATTCAGGGTAGTGGCAGGGCTCATGCTGAAAGTAGTGTGTGCACCCGCCAGCCAGTGTGAGTCCAG
ENSMUSG00000014602	Kif1a	2993	25	55	100	GGCATCAAGATTCAGGGTAGTGGCAGGGCTCATGCTGAAAGTAGTGTGTGCACCCGCCAGCCAGTGTGAGTCCAGTGGAAACTGAGAATTCACCCATCAC
ENSMUSG00000014602	Kif1a	2993	25	56	100	GGGCTCATGCTGAAAGTAGTGTGTGCACCCGCCAGCCAGTGTGAGTCCAGTGGAAACTGAGAATTCACCCATCACTGGGGTCAGGTGCCATATGGGTAGC
ENSMUSG00000014602	Kif1a	2993	25	57	100	CACCCGCCAGCCAGTGTGAGTCCAGTGGAAACTGAGAATTCACCCATCACTGGGGTCAGGTGCCATATGGGTAGCCACCCTCATGCATGGCCACCCTCAT
ENSMUSG00000014602	Kif1a	2993	25	58	100	TGGAAACTGAGAATTCACCCATCACTGGGGTCAGGTGCCATATGGGTAGCCACCCTCATGCATGGCCACCCTCATCCCCAGGACTTGAGCTAATAGTCAT
ENSMUSG00000014602	Kif1a	2993	25	59	100	TGGGGTCAGGTGCCATATGGGTAGCCACCCTCATGCATGGCCACCCTCATCCCCAGGACTTGAGCTAATAGTCATTAGCATCAAGTGCCAGGGAACCCTC
ENSMUSG00000014602	Kif1a	2993	25	60	100	CACCCTCATGCATGGCCACCCTCATCCCCAGGACTTGAGCTAATAGTCATTAGCATCAAGTGCCAGGGAACCCTCTCCATGAAGTATAGAATAAGACTCA
ENSMUSG00000014602	Kif1a	2993	25	61	100	CCCCAGGACTTGAGCTAATAGTCATTAGCATCAAGTGCCAGGGAACCCTCTCCATGAAGTATAGAATAAGACTCATTCCCAAGAATCCAAATCAAGGTGC
ENSMUSG00000014602	Kif1a	2993	25	62	100	TAGCATCAAGTGCCAGGGAACCCTCTCCATGAAGTATAGAATAAGACTCATTCCCAAGAATCCAAATCAAGGTGCCCATCCCAGAGCAAGATTAAACTAG
ENSMUSG00000014602	Kif1a	2993	25	63	100	TCCATGAAGTATAGAATAAGACTCATTCCCAAGAATCCAAATCAAGGTGCCCATCCCAGAGCAAGATTAAACTAGAAACCAGGTGACCTGAGCTGTCCGC
ENSMUSG00000014602	Kif1a	2993	25	64	100	TTCCCAAGAATCCAAATCAAGGTGCCCATCCCAGAGCAAGATTAAACTAGAAACCAGGTGACCTGAGCTGTCCGCGGTGGACTGTGGAGGCAGGAGGTTG
ENSMUSG00000014602	Kif1a	2993	25	65	100	CCATCCCAGAGCAAGATTAAACTAGAAACCAGGTGACCTGAGCTGTCCGCGGTGGACTGTGGAGGCAGGAGGTTGAGATACAAAGTGGGGAGAAGACACC
ENSMUSG00000014602	Kif1a	2993	25	66	100	AAACCAGGTGACCTGAGCTGTCCGCGGTGGACTGTGGAGGCAGGAGGTTGAGATACAAAGTGGGGAGAAGACACCTGTGTTAAGAAGCTCACTCTGGTGC
ENSMUSG00000014602	Kif1a	2993	25	67	100	GGTGGACTGTGGAGGCAGGAGGTTGAGATACAAAGTGGGGAGAAGACACCTGTGTTAAGAAGCTCACTCTGGTGCTCATGACCAGGAGGGAAGGAGCGGG
ENSMUSG00000014602	Kif1a	2993	25	68	100	AGATACAAAGTGGGGAGAAGACACCTGTGTTAAGAAGCTCACTCTGGTGCTCATGACCAGGAGGGAAGGAGCGGGTTGCTTCAATTTCTTGGTTCCCAAG
ENSMUSG00000014602	Kif1a	2993	25	69	100	TGTGTTAAGAAGCTCACTCTGGTGCTCATGACCAGGAGGGAAGGAGCGGGTTGCTTCAATTTCTTGGTTCCCAAGGGCCACACAGCCCCCAGCAGGCAGA
ENSMUSG00000014602	Kif1a	2993	25	70	100	TCATGACCAGGAGGGAAGGAGCGGGTTGCTTCAATTTCTTGGTTCCCAAGGGCCACACAGCCCCCAGCAGGCAGAAAGGCAGTCATGGCTTGCCACACTC
ENSMUSG00000014602	Kif1a	2993	25	71	100	TTGCTTCAATTTCTTGGTTCCCAAGGGCCACACAGCCCCCAGCAGGCAGAAAGGCAGTCATGGCTTGCCACACTCGCTCAGGTCAACCAGCCTGAAGCTG
ENSMUSG00000014602	Kif1a	2993	25	72	100	GGCCACACAGCCCCCAGCAGGCAGAAAGGCAGTCATGGCTTGCCACACTCGCTCAGGTCAACCAGCCTGAAGCTGAGGCCTTGCAAGAGTCCAGCTCCAC
ENSMUSG00000014602	Kif1a	2993	25	73	100	AAGGCAGTCATGGCTTGCCACACTCGCTCAGGTCAACCAGCCTGAAGCTGAGGCCTTGCAAGAGTCCAGCTCCACCCAGGAGGTGGGTGTCTGAGGCCAG
ENSMUSG00000014602	Kif1a	2993	25	74	100	GCTCAGGTCAACCAGCCTGAAGCTGAGGCCTTGCAAGAGTCCAGCTCCACCCAGGAGGTGGGTGTCTGAGGCCAGCCAACCTCCAGAGCACCTGTGCCTG
ENSMUSG00000014602	Kif1a	2993	25	75	100	AGGCCTTGCAAGAGTCCAGCTCCACCCAGGAGGTGGGTGTCTGAGGCCAGCCAACCTCCAGAGCACCTGTGCCTGGGTCGGGTTATAGAAAGGTTGGGAG
ENSMUSG00000014602	Kif1a	2993	25	76	100	CCAGGAGGTGGGTGTCTGAGGCCAGCCAACCTCCAGAGCACCTGTGCCTGGGTCGGGTTATAGAAAGGTTGGGAGCTCTAGTGCCCACCCCACCCCCATT
ENSMUSG00000014602	Kif1a	2993	25	77	100	CCAACCTCCAGAGCACCTGTGCCTGGGTCGGGTTATAGAAAGGTTGGGAGCTCTAGTGCCCACCCCACCCCCATTCAGGGGCCATGCCATACTGGCTGTC
ENSMUSG00000014602	Kif1a	2993	25	78	100	GGTCGGGTTATAGAAAGGTTGGGAGCTCTAGTGCCCACCCCACCCCCATTCAGGGGCCATGCCATACTGGCTGTCCTGGCATTGTCTACGAACCAAGATG
ENSMUSG00000014602	Kif1a	2993	25	79	100	CTCTAGTGCCCACCCCACCCCCATTCAGGGGCCATGCCATACTGGCTGTCCTGGCATTGTCTACGAACCAAGATGGGCTCTCGGCTTTTGTGGGGGTCCT
ENSMUSG00000014602	Kif1a	2993	25	80	100	CAGGGGCCATGCCATACTGGCTGTCCTGGCATTGTCTACGAACCAAGATGGGCTCTCGGCTTTTGTGGGGGTCCTGAGTCAGAACCTAGTAACCAGAACT
ENSMUSG00000014602	Kif1a	2993	25	81	100	CTGGCATTGTCTACGAACCAAGATGGGCTCTCGGCTTTTGTGGGGGTCCTGAGTCAGAACCTAGTAACCAGAACTGATGGACCAAGAAATCTGTCCACAG
ENSMUSG00000014602	Kif1a	2993	25	82	100	GGCTCTCGGCTTTTGTGGGGGTCCTGAGTCAGAACCTAGTAACCAGAACTGATGGACCAAGAAATCTGTCCACAGCTCAGGAAACCTGATTTCTTCATGC
ENSMUSG00000014602	Kif1a	2993	25	83	100	GAGTCAGAACCTAGTAACCAGAACTGATGGACCAAGAAATCTGTCCACAGCTCAGGAAACCTGATTTCTTCATGCCCCACCCCCTTGCCCAAAATTACCT
ENSMUSG00000014602	Kif1a	2993	25	84	100	GATGGACCAAGAAATCTGTCCACAGCTCAGGAAACCTGATTTCTTCATGCCCCACCCCCTTGCCCAAAATTACCTGTATTATGCCAGCTGAAGGTCATTT
ENSMUSG00000014602	Kif1a	2993	25	85	100	CTCAGGAAACCTGATTTCTTCATGCCCCACCCCCTTGCCCAAAATTACCTGTATTATGCCAGCTGAAGGTCATTTGTCCAACAGCTGTGACGTGGAGGGA
ENSMUSG00000014602	Kif1a	2993	25	86	100	CCCACCCCCTTGCCCAAAATTACCTGTATTATGCCAGCTGAAGGTCATTTGTCCAACAGCTGTGACGTGGAGGGATGACATGAGGACTAGGGATAACCTA
ENSMUSG00000014602	Kif1a	2993	25	87	100	GTATTATGCCAGCTGAAGGTCATTTGTCCAACAGCTGTGACGTGGAGGGATGACATGAGGACTAGGGATAACCTAGCTGAGGCCCGTTTCCTGCTTGGTG
ENSMUSG00000014602	Kif1a	2993	25	88	100	GTCCAACAGCTGTGACGTGGAGGGATGACATGAGGACTAGGGATAACCTAGCTGAGGCCCGTTTCCTGCTTGGTGCAGAAAGTGAGATGAATCTAGAAAC
ENSMUSG00000014602	Kif1a	2993	25	89	100	TGACATGAGGACTAGGGATAACCTAGCTGAGGCCCGTTTCCTGCTTGGTGCAGAAAGTGAGATGAATCTAGAAACCCACCTCCACAGACGTTTTGGTTTT
ENSMUSG00000014602	Kif1a	2993	25	90	100	GCTGAGGCCCGTTTCCTGCTTGGTGCAGAAAGTGAGATGAATCTAGAAACCCACCTCCACAGACGTTTTGGTTTTGATACTTAATGTTGCTCAGGCTGTG
ENSMUSG00000014602	Kif1a	2993	25	91	100	CAGAAAGTGAGATGAATCTAGAAACCCACCTCCACAGACGTTTTGGTTTTGATACTTAATGTTGCTCAGGCTGTGACCTCAACTTAGTTTGGGATAATCA
ENSMUSG00000014602	Kif1a	2993	25	92	100	CCACCTCCACAGACGTTTTGGTTTTGATACTTAATGTTGCTCAGGCTGTGACCTCAACTTAGTTTGGGATAATCATCAACTTTCCTGGAGAAGGGGAGTT
ENSMUSG00000014602	Kif1a	2993	25	93	100	GATACTTAATGTTGCTCAGGCTGTGACCTCAACTTAGTTTGGGATAATCATCAACTTTCCTGGAGAAGGGGAGTTGTTTCTGCATCCGGGGTGGGGCGGG
ENSMUSG00000014602	Kif1a	2993	25	94	100	ACCTCAACTTAGTTTGGGATAATCATCAACTTTCCTGGAGAAGGGGAGTTGTTTCTGCATCCGGGGTGGGGCGGGGCCGTGCTGTGTTGGGTTCCTGTGA
ENSMUSG00000014602	Kif1a	2993	25	95	100	TCAACTTTCCTGGAGAAGGGGAGTTGTTTCTGCATCCGGGGTGGGGCGGGGCCGTGCTGTGTTGGGTTCCTGTGAGACCCTGCTTATGCCTGGATAACAC
ENSMUSG00000014602	Kif1a	2993	25	96	100	GTTTCTGCATCCGGGGTGGGGCGGGGCCGTGCTGTGTTGGGTTCCTGTGAGACCCTGCTTATGCCTGGATAACACTTCTAATGCCTCTTGTCCCAAGCAA
ENSMUSG00000014602	Kif1a	2993	25	97	100	GCCGTGCTGTGTTGGGTTCCTGTGAGACCCTGCTTATGCCTGGATAACACTTCTAATGCCTCTTGTCCCAAGCAATCATGCCAGCACCTTATTCAACACA
ENSMUSG00000014602	Kif1a	2993	25	98	100	GACCCTGCTTATGCCTGGATAACACTTCTAATGCCTCTTGTCCCAAGCAATCATGCCAGCACCTTATTCAACACACACACACACACACACACACACACAC
ENSMUSG00000014602	Kif1a	2993	25	99	100	TTCTAATGCCTCTTGTCCCAAGCAATCATGCCAGCACCTTATTCAACACACACACACACACACACACACACACACACACACACACACAAATGTACTAAAT
ENSMUSG00000014602	Kif1a	2993	25	100	100	TCATGCCAGCACCTTATTCAACACACACACACACACACACACACACACACACACACACACACAAATGTACTAAATGATTCTCCTCCTCTCTCCTGGTACC
ENSMUSG00000014602	Kif1a	2993	25	101	100	CACACACACACACACACACACACACACACACACACACAAATGTACTAAATGATTCTCCTCCTCTCTCCTGGTACCTGGAGACCCCTGGCTATCATGGGAT
ENSMUSG00000014602	Kif1a	2993	25	102	100	ACACACACACACAAATGTACTAAATGATTCTCCTCCTCTCTCCTGGTACCTGGAGACCCCTGGCTATCATGGGATTACTGAATGTGGCTGATGTTACAGA
ENSMUSG00000014602	Kif1a	2993	25	103	100	GATTCTCCTCCTCTCTCCTGGTACCTGGAGACCCCTGGCTATCATGGGATTACTGAATGTGGCTGATGTTACAGATGTGAACAAGACTAAGATGGTTCTC
ENSMUSG00000014602	Kif1a	2993	25	104	100	TGGAGACCCCTGGCTATCATGGGATTACTGAATGTGGCTGATGTTACAGATGTGAACAAGACTAAGATGGTTCTCTGCTCCACTCAGCATGGGGACTTCA
ENSMUSG00000014602	Kif1a	2993	25	105	100	TACTGAATGTGGCTGATGTTACAGATGTGAACAAGACTAAGATGGTTCTCTGCTCCACTCAGCATGGGGACTTCATAAGACACATTCCTTTATCCCTGGG
ENSMUSG00000014602	Kif1a	2993	25	106	100	TGTGAACAAGACTAAGATGGTTCTCTGCTCCACTCAGCATGGGGACTTCATAAGACACATTCCTTTATCCCTGGGACCGGAGCCATGCAGTCCCTCAGGA
ENSMUSG00000014602	Kif1a	2993	25	107	100	TGCTCCACTCAGCATGGGGACTTCATAAGACACATTCCTTTATCCCTGGGACCGGAGCCATGCAGTCCCTCAGGATGGACAGATATGGCTGACCTGAGTC
ENSMUSG00000014602	Kif1a	2993	25	108	100	TAAGACACATTCCTTTATCCCTGGGACCGGAGCCATGCAGTCCCTCAGGATGGACAGATATGGCTGACCTGAGTCTCTCCTTGAGCCTGGACCTCCTGTG
ENSMUSG00000014602	Kif1a	2993	25	109	100	ACCGGAGCCATGCAGTCCCTCAGGATGGACAGATATGGCTGACCTGAGTCTCTCCTTGAGCCTGGACCTCCTGTGGTTTGTCTATACCGAGGGGCCCCTG
ENSMUSG00000014602	Kif1a	2993	25	110	100	TGGACAGATATGGCTGACCTGAGTCTCTCCTTGAGCCTGGACCTCCTGTGGTTTGTCTATACCGAGGGGCCCCTGCAACTCAGAGGCTGTTTCCCTGACC
ENSMUSG00000014602	Kif1a	2993	25	111	100	TCTCCTTGAGCCTGGACCTCCTGTGGTTTGTCTATACCGAGGGGCCCCTGCAACTCAGAGGCTGTTTCCCTGACCTGTACATATGTGGTTGCTGTGGGCT
ENSMUSG00000014602	Kif1a	2993	25	112	100	GTTTGTCTATACCGAGGGGCCCCTGCAACTCAGAGGCTGTTTCCCTGACCTGTACATATGTGGTTGCTGTGGGCTCCCCCTGGCCCCTGTGTCATAACCA
ENSMUSG00000014602	Kif1a	2993	25	113	100	CAACTCAGAGGCTGTTTCCCTGACCTGTACATATGTGGTTGCTGTGGGCTCCCCCTGGCCCCTGTGTCATAACCACCTGACGTAATGACTAGTATCCTGC
ENSMUSG00000014602	Kif1a	2993	25	114	100	TGTACATATGTGGTTGCTGTGGGCTCCCCCTGGCCCCTGTGTCATAACCACCTGACGTAATGACTAGTATCCTGCTGTTTACACCCGAGTGTTAGCTGTA
ENSMUSG00000014602	Kif1a	2993	25	115	100	CCCCCTGGCCCCTGTGTCATAACCACCTGACGTAATGACTAGTATCCTGCTGTTTACACCCGAGTGTTAGCTGTAGGCTCCTGTACTGTTTGTGTGCACT
ENSMUSG00000014602	Kif1a	2993	25	116	100	CCTGACGTAATGACTAGTATCCTGCTGTTTACACCCGAGTGTTAGCTGTAGGCTCCTGTACTGTTTGTGTGCACTTAGGGCTCTGTCCAATTAAGAAATA
ENSMUSG00000014602	Kif1a	2993	25	117	93	TGTTTACACCCGAGTGTTAGCTGTAGGCTCCTGTACTGTTTGTGTGCACTTAGGGCTCTGTCCAATTAAGAAATAAATGTGGCTCTCATGCAA
ENSMUSG00000015222	Map2	3576	25	1	100	ATACTTCTCCTTTAGCACTGGAGTAACATTTAGGCATGAGCTCTTGGCAGGAGTGGGCTCTGAGCAGGTGTCATATTCATTCTTTACAAACCATAGAGAA
ENSMUSG00000015222	Map2	3576	25	2	100	ACATTTAGGCATGAGCTCTTGGCAGGAGTGGGCTCTGAGCAGGTGTCATATTCATTCTTTACAAACCATAGAGAAATAATTTCATCCCCCAACTGTAGTA
ENSMUSG00000015222	Map2	3576	25	3	100	GAGTGGGCTCTGAGCAGGTGTCATATTCATTCTTTACAAACCATAGAGAAATAATTTCATCCCCCAACTGTAGTAATTGTTACAATTTTATATAAAAAAT
ENSMUSG00000015222	Map2	3576	25	4	100	TTCATTCTTTACAAACCATAGAGAAATAATTTCATCCCCCAACTGTAGTAATTGTTACAATTTTATATAAAAAATTAATAGTATATGCAGAAAATGACCT
ENSMUSG00000015222	Map2	3576	25	5	100	ATAATTTCATCCCCCAACTGTAGTAATTGTTACAATTTTATATAAAAAATTAATAGTATATGCAGAAAATGACCTGAATTCCATCCGCAACAAGGACACA
ENSMUSG00000015222	Map2	3576	25	6	100	ATTGTTACAATTTTATATAAAAAATTAATAGTATATGCAGAAAATGACCTGAATTCCATCCGCAACAAGGACACATGGCTTTACATGGATACAATCGGAC
ENSMUSG00000015222	Map2	3576	25	7	100	TAATAGTATATGCAGAAAATGACCTGAATTCCATCCGCAACAAGGACACATGGCTTTACATGGATACAATCGGACAATTATTTTCGCTCTGCTCTGTTTT
ENSMUSG00000015222	Map2	3576	25	8	100	GAATTCCATCCGCAACAAGGACACATGGCTTTACATGGATACAATCGGACAATTATTTTCGCTCTGCTCTGTTTTGCATGGAGTATTATTATTATTTTTT
ENSMUSG00000015222	Map2	3576	25	9	100	TGGCTTTACATGGATACAATCGGACAATTATTTTCGCTCTGCTCTGTTTTGCATGGAGTATTATTATTATTTTTTAAATTGCATTTTTACCTTTCATGTG
ENSMUSG00000015222	Map2	3576	25	10	100	AATTATTTTCGCTCTGCTCTGTTTTGCATGGAGTATTATTATTATTTTTTAAATTGCATTTTTACCTTTCATGTGCCTGAAGGCTATCCAATACATTCTG
ENSMUSG00000015222	Map2	3576	25	11	100	GCATGGAGTATTATTATTATTTTTTAAATTGCATTTTTACCTTTCATGTGCCTGAAGGCTATCCAATACATTCTGAAAGGCCTTGTTAAAAATCCAAGCT
ENSMUSG00000015222	Map2	3576	25	12	100	AAATTGCATTTTTACCTTTCATGTGCCTGAAGGCTATCCAATACATTCTGAAAGGCCTTGTTAAAAATCCAAGCTGCTCATTTCCCTATTCTGTTTATGG
ENSMUSG00000015222	Map2	3576	25	13	100	CCTGAAGGCTATCCAATACATTCTGAAAGGCCTTGTTAAAAATCCAAGCTGCTCATTTCCCTATTCTGTTTATGGTTGAAAAGATTAAAACCTACCCATT
ENSMUSG00000015222	Map2	3576	25	14	100	AAAGGCCTTGTTAAAAATCCAAGCTGCTCATTTCCCTATTCTGTTTATGGTTGAAAAGATTAAAACCTACCCATTGTTACTTACTACAGGTTCGATGAAA
ENSMUSG00000015222	Map2	3576	25	15	100	GCTCATTTCCCTATTCTGTTTATGGTTGAAAAGATTAAAACCTACCCATTGTTACTTACTACAGGTTCGATGAAATCAAGGAGTCTGATTGCAGGAAGGA
ENSMUSG00000015222	Map2	3576	25	16	100	TTGAAAAGATTAAAACCTACCCATTGTTACTTACTACAGGTTCGATGAAATCAAGGAGTCTGATTGCAGGAAGGAAAGAGCATGTAAGAAACACATTTTT
ENSMUSG00000015222	Map2	3576	25	17	100	GTTACTTACTACAGGTTCGATGAAATCAAGGAGTCTGATTGCAGGAAGGAAAGAGCATGTAAGAAACACATTTTTTAAAGTGTTATTTTGTATAAATGGG
ENSMUSG00000015222	Map2	3576	25	18	100	TCAAGGAGTCTGATTGCAGGAAGGAAAGAGCATGTAAGAAACACATTTTTTAAAGTGTTATTTTGTATAAATGGGAAGAAAGACGCAATTAAGTTATTGA
ENSMUSG00000015222	Map2	3576	25	19	100	AAGAGCATGTAAGAAACACATTTTTTAAAGTGTTATTTTGTATAAATGGGAAGAAAGACGCAATTAAGTTATTGACACTTGGGACCTGGACGAGTATATC
ENSMUSG00000015222	Map2	3576	25	20	100	TAAAGTGTTATTTTGTATAAATGGGAAGAAAGACGCAATTAAGTTATTGACACTTGGGACCTGGACGAGTATATCAGAGTATGCCATTCCAATAAATTAT
ENSMUSG00000015222	Map2	3576	25	21	100	AAGAAAGACGCAATTAAGTTATTGACACTTGGGACCTGGACGAGTATATCAGAGTATGCCATTCCAATAAATTATTGAACTACAAGCTAGATTTAAGGCA
ENSMUSG00000015222	Map2	3576	25	22	100	CACTTGGGACCTGGACGAGTATATCAGAGTATGCCATTCCAATAAATTATTGAACTACAAGCTAGATTTAAGGCATTTGAGCGTTGGTTGAAGAAGTGGT
ENSMUSG00000015222	Map2	3576	25	23	100	AGAGTATGCCATTCCAATAAATTATTGAACTACAAGCTAGATTTAAGGCATTTGAGCGTTGGTTGAAGAAGTGGTGTCAAAGTGCATCTCTTAGGATTGA
ENSMUSG00000015222	Map2	3576	25	24	100	TGAACTACAAGCTAGATTTAAGGCATTTGAGCGTTGGTTGAAGAAGTGGTGTCAAAGTGCATCTCTTAGGATTGATGCACTTTTGTTAGGATGGGCTTGT
ENSMUSG00000015222	Map2	3576	25	25	100	TTTGAGCGTTGGTTGAAGAAGTGGTGTCAAAGTGCATCTCTTAGGATTGATGCACTTTTGTTAGGATGGGCTTGTGTCTGATTAGAATGTCAGTCGATTG
ENSMUSG00000015222	Map2	3576	25	26	100	GTCAAAGTGCATCTCTTAGGATTGATGCACTTTTGTTAGGATGGGCTTGTGTCTGATTAGAATGTCAGTCGATTGGCTAGATTTATATCCACACAATCAG
ENSMUSG00000015222	Map2	3576	25	27	100	TGCACTTTTGTTAGGATGGGCTTGTGTCTGATTAGAATGTCAGTCGATTGGCTAGATTTATATCCACACAATCAGTTTCACACCCCCATTCCATCTGTTT
ENSMUSG00000015222	Map2	3576	25	28	100	GTCTGATTAGAATGTCAGTCGATTGGCTAGATTTATATCCACACAATCAGTTTCACACCCCCATTCCATCTGTTTGATACAGTATTATAGATATAAATAT
ENSMUSG00000015222	Map2	3576	25	29	100	GCTAGATTTATATCCACACAATCAGTTTCACACCCCCATTCCATCTGTTTGATACAGTATTATAGATATAAATATATATATATATTTCTCTGTGGCCATT
ENSMUSG00000015222	Map2	3576	25	30	100	TTTCACACCCCCATTCCATCTGTTTGATACAGTATTATAGATATAAATATATATATATATTTCTCTGTGGCCATTTGTGATACTTCCTCATATACTTGAA
ENSMUSG00000015222	Map2	3576	25	31	100	GATACAGTATTATAGATATAAATATATATATATATTTCTCTGTGGCCATTTGTGATACTTCCTCATATACTTGAATATGATACTTCTTTATTCACAGTAT
ENSMUSG00000015222	Map2	3576	25	32	100	ATATATATATTTCTCTGTGGCCATTTGTGATACTTCCTCATATACTTGAATATGATACTTCTTTATTCACAGTATCTGTGTCTCCTGCACCCTTTGGTGT
ENSMUSG00000015222	Map2	3576	25	33	100	TGTGATACTTCCTCATATACTTGAATATGATACTTCTTTATTCACAGTATCTGTGTCTCCTGCACCCTTTGGTGTTGCAATTTTAGGTATGTGAAAGTAG
ENSMUSG00000015222	Map2	3576	25	34	100	TATGATACTTCTTTATTCACAGTATCTGTGTCTCCTGCACCCTTTGGTGTTGCAATTTTAGGTATGTGAAAGTAGATGTTAGCAGGGTTCTCTCCCTATT
ENSMUSG00000015222	Map2	3576	25	35	100	CTGTGTCTCCTGCACCCTTTGGTGTTGCAATTTTAGGTATGTGAAAGTAGATGTTAGCAGGGTTCTCTCCCTATTTAAAAATAAATTTTAAAAAGACAAA
ENSMUSG00000015222	Map2	3576	25	36	100	TGCAATTTTAGGTATGTGAAAGTAGATGTTAGCAGGGTTCTCTCCCTATTTAAAAATAAATTTTAAAAAGACAAAGAGTTTTAGCATGAAGTTGCTTTCT
ENSMUSG00000015222	Map2	3576	25	37	100	ATGTTAGCAGGGTTCTCTCCCTATTTAAAAATAAATTTTAAAAAGACAAAGAGTTTTAGCATGAAGTTGCTTTCTGTAACAACTCAAAGCTGTAACCCTG
ENSMUSG00000015222	Map2	3576	25	38	100	TAAAAATAAATTTTAAAAAGACAAAGAGTTTTAGCATGAAGTTGCTTTCTGTAACAACTCAAAGCTGTAACCCTGTCTTAGTGCCAGAATCAAGTCTTTC
ENSMUSG00000015222	Map2	3576	25	39	100	GAGTTTTAGCATGAAGTTGCTTTCTGTAACAACTCAAAGCTGTAACCCTGTCTTAGTGCCAGAATCAAGTCTTTCCTGTGATGCTAGAACATTTTACTTT
ENSMUSG00000015222	Map2	3576	25	40	100	GTAACAACTCAAAGCTGTAACCCTGTCTTAGTGCCAGAATCAAGTCTTTCCTGTGATGCTAGAACATTTTACTTTTCTTTGCTTCCACCAACATGGAGTT
ENSMUSG00000015222	Map2	3576	25	41	100	TCTTAGTGCCAGAATCAAGTCTTTCCTGTGATGCTAGAACATTTTACTTTTCTTTGCTTCCACCAACATGGAGTTTGTGGAGTGGGTCCAGTTATGCATA
ENSMUSG00000015222	Map2	3576	25	42	100	CTGTGATGCTAGAACATTTTACTTTTCTTTGCTTCCACCAACATGGAGTTTGTGGAGTGGGTCCAGTTATGCATAAAGGGGTTTACAGATGTTGGTTCAA
ENSMUSG00000015222	Map2	3576	25	43	100	TCTTTGCTTCCACCAACATGGAGTTTGTGGAGTGGGTCCAGTTATGCATAAAGGGGTTTACAGATGTTGGTTCAAGGATTATGGATTTATCTCATGTATA
ENSMUSG00000015222	Map2	3576	25	44	100	TGTGGAGTGGGTCCAGTTATGCATAAAGGGGTTTACAGATGTTGGTTCAAGGATTATGGATTTATCTCATGTATAATCACTAAATAGGTCGGGTTTTATC
ENSMUSG00000015222	Map2	3576	25	45	100	AAGGGGTTTACAGATGTTGGTTCAAGGATTATGGATTTATCTCATGTATAATCACTAAATAGGTCGGGTTTTATCCCTCTAATTATCCATGACACCAATC
ENSMUSG00000015222	Map2	3576	25	46	100	GGATTATGGATTTATCTCATGTATAATCACTAAATAGGTCGGGTTTTATCCCTCTAATTATCCATGACACCAATCTCTTACTATTCATTACTCTTTCTTC
ENSMUSG00000015222	Map2	3576	25	47	100	ATCACTAAATAGGTCGGGTTTTATCCCTCTAATTATCCATGACACCAATCTCTTACTATTCATTACTCTTTCTTCTATTTCCTTTTTCCATTTGCTAAAG
ENSMUSG00000015222	Map2	3576	25	48	100	CCTCTAATTATCCATGACACCAATCTCTTACTATTCATTACTCTTTCTTCTATTTCCTTTTTCCATTTGCTAAAGTTGAAAGTAGGAAAAAATAATTTTG
ENSMUSG00000015222	Map2	3576	25	49	100	TCTTACTATTCATTACTCTTTCTTCTATTTCCTTTTTCCATTTGCTAAAGTTGAAAGTAGGAAAAAATAATTTTGAATAGCTTTTCTTGTTCTCCAAACA
ENSMUSG00000015222	Map2	3576	25	50	100	TATTTCCTTTTTCCATTTGCTAAAGTTGAAAGTAGGAAAAAATAATTTTGAATAGCTTTTCTTGTTCTCCAAACAGTATCTGTTCATTAAATTCTGTGAT
ENSMUSG00000015222	Map2	3576	25	51	100	TTGAAAGTAGGAAAAAATAATTTTGAATAGCTTTTCTTGTTCTCCAAACAGTATCTGTTCATTAAATTCTGTGATAGAATATATTTGGCTTCCTTCCCCC
ENSMUSG00000015222	Map2	3576	25	52	100	AATAGCTTTTCTTGTTCTCCAAACAGTATCTGTTCATTAAATTCTGTGATAGAATATATTTGGCTTCCTTCCCCCAAAGACCTCTTGATCAAAGATGAAA
ENSMUSG00000015222	Map2	3576	25	53	100	GTATCTGTTCATTAAATTCTGTGATAGAATATATTTGGCTTCCTTCCCCCAAAGACCTCTTGATCAAAGATGAAAAATACAACATATAAAGAAGCTATAT
ENSMUSG00000015222	Map2	3576	25	54	100	AGAATATATTTGGCTTCCTTCCCCCAAAGACCTCTTGATCAAAGATGAAAAATACAACATATAAAGAAGCTATATATGTAATACTTTTGAGACACAGATA
ENSMUSG00000015222	Map2	3576	25	55	100	AAAGACCTCTTGATCAAAGATGAAAAATACAACATATAAAGAAGCTATATATGTAATACTTTTGAGACACAGATATCTAAATCCATCTCTCCAGGATTCT
ENSMUSG00000015222	Map2	3576	25	56	100	AATACAACATATAAAGAAGCTATATATGTAATACTTTTGAGACACAGATATCTAAATCCATCTCTCCAGGATTCTTCATGAACATGGAACATGGTATTAC
ENSMUSG00000015222	Map2	3576	25	57	100	ATGTAATACTTTTGAGACACAGATATCTAAATCCATCTCTCCAGGATTCTTCATGAACATGGAACATGGTATTACTTATTCATGAGTAAATGCTATTTTT
ENSMUSG00000015222	Map2	3576	25	58	100	TCTAAATCCATCTCTCCAGGATTCTTCATGAACATGGAACATGGTATTACTTATTCATGAGTAAATGCTATTTTTTTCTTGCTTTATATACAATCTAGAC
ENSMUSG00000015222	Map2	3576	25	59	100	TCATGAACATGGAACATGGTATTACTTATTCATGAGTAAATGCTATTTTTTTCTTGCTTTATATACAATCTAGACATCACAACTCAATTACTATCATTTA
ENSMUSG00000015222	Map2	3576	25	60	100	TTATTCATGAGTAAATGCTATTTTTTTCTTGCTTTATATACAATCTAGACATCACAACTCAATTACTATCATTTACAAATCATACTTAATGAATAAGTAA
ENSMUSG00000015222	Map2	3576	25	61	100	TTCTTGCTTTATATACAATCTAGACATCACAACTCAATTACTATCATTTACAAATCATACTTAATGAATAAGTAATAGTCGATGGCCCAAAATAAGGCAG
ENSMUSG00000015222	Map2	3576	25	62	100	ATCACAACTCAATTACTATCATTTACAAATCATACTTAATGAATAAGTAATAGTCGATGGCCCAAAATAAGGCAGAGCATTATCAAACCGAGTGGACTTT
ENSMUSG00000015222	Map2	3576	25	63	100	CAAATCATACTTAATGAATAAGTAATAGTCGATGGCCCAAAATAAGGCAGAGCATTATCAAACCGAGTGGACTTTTTTTCTTAATATTTAATTTGTTCTT
ENSMUSG00000015222	Map2	3576	25	64	100	TAGTCGATGGCCCAAAATAAGGCAGAGCATTATCAAACCGAGTGGACTTTTTTTCTTAATATTTAATTTGTTCTTTTGCTTGCTCGGGATTGGTGGGTGG
ENSMUSG00000015222	Map2	3576	25	65	100	AGCATTATCAAACCGAGTGGACTTTTTTTCTTAATATTTAATTTGTTCTTTTGCTTGCTCGGGATTGGTGGGTGGAATATGCAGAGATAAATGTGAAAAA
ENSMUSG00000015222	Map2	3576	25	66	100	TTTTCTTAATATTTAATTTGTTCTTTTGCTTGCTCGGGATTGGTGGGTGGAATATGCAGAGATAAATGTGAAAAAGCTGTCTGGGTGTTTTATGTCTCTG
ENSMUSG00000015222	Map2	3576	25	67	100	TTGCTTGCTCGGGATTGGTGGGTGGAATATGCAGAGATAAATGTGAAAAAGCTGTCTGGGTGTTTTATGTCTCTGAAATAAACCAAGCCCTGTATACAAA
ENSMUSG00000015222	Map2	3576	25	68	100	AATATGCAGAGATAAATGTGAAAAAGCTGTCTGGGTGTTTTATGTCTCTGAAATAAACCAAGCCCTGTATACAAAGGAGAAGGTGAACATGAACAGGATA
ENSMUSG00000015222	Map2	3576	25	69	100	GCTGTCTGGGTGTTTTATGTCTCTGAAATAAACCAAGCCCTGTATACAAAGGAGAAGGTGAACATGAACAGGATAGGAAGATGTAGGAGTGTCTAAGACA
ENSMUSG00000015222	Map2	3576	25	70	100	AAATAAACCAAGCCCTGTATACAAAGGAGAAGGTGAACATGAACAGGATAGGAAGATGTAGGAGTGTCTAAGACAGAAGGCAAGAGGATGCAAAAGTGGA
ENSMUSG00000015222	Map2	3576	25	71	100	GGAGAAGGTGAACATGAACAGGATAGGAAGATGTAGGAGTGTCTAAGACAGAAGGCAAGAGGATGCAAAAGTGGAGAGAAACAGGTGGCAGTTTAGTGAC
ENSMUSG00000015222	Map2	3576	25	72	100	GGAAGATGTAGGAGTGTCTAAGACAGAAGGCAAGAGGATGCAAAAGTGGAGAGAAACAGGTGGCAGTTTAGTGACCCATTGAGTATTATGACCAATGTGA
ENSMUSG00000015222	Map2	3576	25	73	100	GAAGGCAAGAGGATGCAAAAGTGGAGAGAAACAGGTGGCAGTTTAGTGACCCATTGAGTATTATGACCAATGTGACAGTCACATAGAAAGCTTAGCATCA
ENSMUSG00000015222	Map2	3576	25	74	100	GAGAAACAGGTGGCAGTTTAGTGACCCATTGAGTATTATGACCAATGTGACAGTCACATAGAAAGCTTAGCATCAAACAGAGACAGTCTTATTGGCTAGT
ENSMUSG00000015222	Map2	3576	25	75	100	CCATTGAGTATTATGACCAATGTGACAGTCACATAGAAAGCTTAGCATCAAACAGAGACAGTCTTATTGGCTAGTAGGCACACACACACTACAGTCGTCT
ENSMUSG00000015222	Map2	3576	25	76	100	CAGTCACATAGAAAGCTTAGCATCAAACAGAGACAGTCTTATTGGCTAGTAGGCACACACACACTACAGTCGTCTTTGTAAATTGGTTATTTTTTATATA
ENSMUSG00000015222	Map2	3576	25	77	100	AACAGAGACAGTCTTATTGGCTAGTAGGCACACACACACTACAGTCGTCTTTGTAAATTGGTTATTTTTTATATAACTTTAAAACTACTGAATAGTGGTT
ENSMUSG00000015222	Map2	3576	25	78	100	AGGCACACACACACTACAGTCGTCTTTGTAAATTGGTTATTTTTTATATAACTTTAAAACTACTGAATAGTGGTTTTCACTCTGGACAACCCATTCCTTA
ENSMUSG00000015222	Map2	3576	25	79	100	TTGTAAATTGGTTATTTTTTATATAACTTTAAAACTACTGAATAGTGGTTTTCACTCTGGACAACCCATTCCTTACCTTCTCTTGAAATGCACAGAAAAT
ENSMUSG00000015222	Map2	3576	25	80	100	ACTTTAAAACTACTGAATAGTGGTTTTCACTCTGGACAACCCATTCCTTACCTTCTCTTGAAATGCACAGAAAATGGAAGAAGGAATGACTGTGTGTGGA
ENSMUSG00000015222	Map2	3576	25	81	100	TTCACTCTGGACAACCCATTCCTTACCTTCTCTTGAAATGCACAGAAAATGGAAGAAGGAATGACTGTGTGTGGAGAAGTACAGTCTTTTCTTACATGTT
ENSMUSG00000015222	Map2	3576	25	82	100	CCTTCTCTTGAAATGCACAGAAAATGGAAGAAGGAATGACTGTGTGTGGAGAAGTACAGTCTTTTCTTACATGTTTTGATAGACAAGGATCAAAGTTGTC
ENSMUSG00000015222	Map2	3576	25	83	100	GGAAGAAGGAATGACTGTGTGTGGAGAAGTACAGTCTTTTCTTACATGTTTTGATAGACAAGGATCAAAGTTGTCTAGGAAAAAAAGGTACCAGATGATC
ENSMUSG00000015222	Map2	3576	25	84	100	GAAGTACAGTCTTTTCTTACATGTTTTGATAGACAAGGATCAAAGTTGTCTAGGAAAAAAAGGTACCAGATGATCCATGTGGTTTTAAACTATGCAGAAA
ENSMUSG00000015222	Map2	3576	25	85	100	TTGATAGACAAGGATCAAAGTTGTCTAGGAAAAAAAGGTACCAGATGATCCATGTGGTTTTAAACTATGCAGAAAATAATTTCAACCCAGTTTATTATAA
ENSMUSG00000015222	Map2	3576	25	86	100	TAGGAAAAAAAGGTACCAGATGATCCATGTGGTTTTAAACTATGCAGAAAATAATTTCAACCCAGTTTATTATAAAAATTAAGCCTAAGTAAACATTTTC
ENSMUSG00000015222	Map2	3576	25	87	100	CATGTGGTTTTAAACTATGCAGAAAATAATTTCAACCCAGTTTATTATAAAAATTAAGCCTAAGTAAACATTTTCTTTGTGTTAAAATTCAGTTTCTTAT
ENSMUSG00000015222	Map2	3576	25	88	100	ATAATTTCAACCCAGTTTATTATAAAAATTAAGCCTAAGTAAACATTTTCTTTGTGTTAAAATTCAGTTTCTTATGATGCGTGTTCAAAAAAATTATGTA
ENSMUSG00000015222	Map2	3576	25	89	100	AAATTAAGCCTAAGTAAACATTTTCTTTGTGTTAAAATTCAGTTTCTTATGATGCGTGTTCAAAAAAATTATGTAAACCCCAATGTTAATAGATCTAGCA
ENSMUSG00000015222	Map2	3576	25	90	100	TTTGTGTTAAAATTCAGTTTCTTATGATGCGTGTTCAAAAAAATTATGTAAACCCCAATGTTAATAGATCTAGCACTAAAATAATCATTTTTTCTAATGT
ENSMUSG00000015222	Map2	3576	25	91	100	GATGCGTGTTCAAAAAAATTATGTAAACCCCAATGTTAATAGATCTAGCACTAAAATAATCATTTTTTCTAATGTCAAAACAATTATAATGGATATAAGT
ENSMUSG00000015222	Map2	3576	25	92	100	AACCCCAATGTTAATAGATCTAGCACTAAAATAATCATTTTTTCTAATGTCAAAACAATTATAATGGATATAAGTCCTTGTTCTATGTGAAATGTGTTTC
ENSMUSG00000015222	Map2	3576	25	93	100	CTAAAATAATCATTTTTTCTAATGTCAAAACAATTATAATGGATATAAGTCCTTGTTCTATGTGAAATGTGTTTCTCTATAAAGTTATCACAAGAAGGAA
ENSMUSG00000015222	Map2	3576	25	94	100	CAAAACAATTATAATGGATATAAGTCCTTGTTCTATGTGAAATGTGTTTCTCTATAAAGTTATCACAAGAAGGAATTTTTATAGGAGACAGACAGAGAAA
ENSMUSG00000015222	Map2	3576	25	95	100	CCTTGTTCTATGTGAAATGTGTTTCTCTATAAAGTTATCACAAGAAGGAATTTTTATAGGAGACAGACAGAGAAATGCACAGGCTAAAATCATTTCCTTA
ENSMUSG00000015222	Map2	3576	25	96	100	TCTATAAAGTTATCACAAGAAGGAATTTTTATAGGAGACAGACAGAGAAATGCACAGGCTAAAATCATTTCCTTATGGGAATGTGGGATGGAGCTCACCT
ENSMUSG00000015222	Map2	3576	25	97	100	TTTTTATAGGAGACAGACAGAGAAATGCACAGGCTAAAATCATTTCCTTATGGGAATGTGGGATGGAGCTCACCTTACCTACTCTCTTAAGATAATGACT
ENSMUSG00000015222	Map2	3576	25	98	100	TGCACAGGCTAAAATCATTTCCTTATGGGAATGTGGGATGGAGCTCACCTTACCTACTCTCTTAAGATAATGACTCAAATTAAGCTTTTTGGACACCACT
ENSMUSG00000015222	Map2	3576	25	99	100	TGGGAATGTGGGATGGAGCTCACCTTACCTACTCTCTTAAGATAATGACTCAAATTAAGCTTTTTGGACACCACTTTTGTGGGGATACACATACGCTGAT
ENSMUSG00000015222	Map2	3576	25	100	100	TACCTACTCTCTTAAGATAATGACTCAAATTAAGCTTTTTGGACACCACTTTTGTGGGGATACACATACGCTGATCTAGAAATGAAAGGTGCACTACTGC
ENSMUSG00000015222	Map2	3576	25	101	100	CAAATTAAGCTTTTTGGACACCACTTTTGTGGGGATACACATACGCTGATCTAGAAATGAAAGGTGCACTACTGCATTTCTAGATCCACTAATGCCAGTT
ENSMUSG00000015222	Map2	3576	25	102	100	TTTGTGGGGATACACATACGCTGATCTAGAAATGAAAGGTGCACTACTGCATTTCTAGATCCACTAATGCCAGTTTCTCTCTGGCTTTAGCCTTTGAGAA
ENSMUSG00000015222	Map2	3576	25	103	100	CTAGAAATGAAAGGTGCACTACTGCATTTCTAGATCCACTAATGCCAGTTTCTCTCTGGCTTTAGCCTTTGAGAACCTGTTTAAGAATACGTAAGTATCC
ENSMUSG00000015222	Map2	3576	25	104	100	ATTTCTAGATCCACTAATGCCAGTTTCTCTCTGGCTTTAGCCTTTGAGAACCTGTTTAAGAATACGTAAGTATCCAGAGCTCGGAAGAGTTCCAAGGCCC
ENSMUSG00000015222	Map2	3576	25	105	100	TCTCTCTGGCTTTAGCCTTTGAGAACCTGTTTAAGAATACGTAAGTATCCAGAGCTCGGAAGAGTTCCAAGGCCCACTTTTTCAATAAACTCACACACTC
ENSMUSG00000015222	Map2	3576	25	106	100	CCTGTTTAAGAATACGTAAGTATCCAGAGCTCGGAAGAGTTCCAAGGCCCACTTTTTCAATAAACTCACACACTCTGGGTCTCCTGCAACTGACAATTGG
ENSMUSG00000015222	Map2	3576	25	107	100	AGAGCTCGGAAGAGTTCCAAGGCCCACTTTTTCAATAAACTCACACACTCTGGGTCTCCTGCAACTGACAATTGGGTACCTTGCAACAATGCAGGAAGGA
ENSMUSG00000015222	Map2	3576	25	108	100	ACTTTTTCAATAAACTCACACACTCTGGGTCTCCTGCAACTGACAATTGGGTACCTTGCAACAATGCAGGAAGGATCCGAGTCTATGATGAGTTTCAAAG
ENSMUSG00000015222	Map2	3576	25	109	100	TGGGTCTCCTGCAACTGACAATTGGGTACCTTGCAACAATGCAGGAAGGATCCGAGTCTATGATGAGTTTCAAAGGCCAAGTTCCTTTAGGAACTGACTC
ENSMUSG00000015222	Map2	3576	25	110	100	GTACCTTGCAACAATGCAGGAAGGATCCGAGTCTATGATGAGTTTCAAAGGCCAAGTTCCTTTAGGAACTGACTCTCTCTGGATCTGCCTGCTGCGTTCC
ENSMUSG00000015222	Map2	3576	25	111	100	TCCGAGTCTATGATGAGTTTCAAAGGCCAAGTTCCTTTAGGAACTGACTCTCTCTGGATCTGCCTGCTGCGTTCCAGCAGGATGACGGGCTGAAATCCCA
ENSMUSG00000015222	Map2	3576	25	112	100	GCCAAGTTCCTTTAGGAACTGACTCTCTCTGGATCTGCCTGCTGCGTTCCAGCAGGATGACGGGCTGAAATCCCACCCATAGGAAAGACCCCTGTGCAAT
ENSMUSG00000015222	Map2	3576	25	113	100	TCTCTGGATCTGCCTGCTGCGTTCCAGCAGGATGACGGGCTGAAATCCCACCCATAGGAAAGACCCCTGTGCAATTCCAGCTCAGTTTGGCTGAAGGTAG
ENSMUSG00000015222	Map2	3576	25	114	100	AGCAGGATGACGGGCTGAAATCCCACCCATAGGAAAGACCCCTGTGCAATTCCAGCTCAGTTTGGCTGAAGGTAGCTGAAGAAGAGAGCCAGTAAAGGGA
ENSMUSG00000015222	Map2	3576	25	115	100	CCCATAGGAAAGACCCCTGTGCAATTCCAGCTCAGTTTGGCTGAAGGTAGCTGAAGAAGAGAGCCAGTAAAGGGAAGAATAGACTGTAGTTGCCCTTCTC
ENSMUSG00000015222	Map2	3576	25	116	100	TCCAGCTCAGTTTGGCTGAAGGTAGCTGAAGAAGAGAGCCAGTAAAGGGAAGAATAGACTGTAGTTGCCCTTCTCCACACACACTCACACAGATGTGGGG
ENSMUSG00000015222	Map2	3576	25	117	100	CTGAAGAAGAGAGCCAGTAAAGGGAAGAATAGACTGTAGTTGCCCTTCTCCACACACACTCACACAGATGTGGGGTAGAAGAGAGATATAATGCCAAATG
ENSMUSG00000015222	Map2	3576	25	118	100	AGAATAGACTGTAGTTGCCCTTCTCCACACACACTCACACAGATGTGGGGTAGAAGAGAGATATAATGCCAAATGTAGCATTATGTCAGTGGTAGTAAAG
ENSMUSG00000015222	Map2	3576	25	119	100	CACACACACTCACACAGATGTGGGGTAGAAGAGAGATATAATGCCAAATGTAGCATTATGTCAGTGGTAGTAAAGAAATGATATAAAAGCAAATAATTCT
ENSMUSG00000015222	Map2	3576	25	120	100	TAGAAGAGAGATATAATGCCAAATGTAGCATTATGTCAGTGGTAGTAAAGAAATGATATAAAAGCAAATAATTCTGACTTAGCCTCATTTATAGCTTTCC
ENSMUSG00000015222	Map2	3576	25	121	100	TAGCATTATGTCAGTGGTAGTAAAGAAATGATATAAAAGCAAATAATTCTGACTTAGCCTCATTTATAGCTTTCCTCTCATATTTCATGCCACATGGGGG
ENSMUSG00000015222	Map2	3576	25	122	100	AAATGATATAAAAGCAAATAATTCTGACTTAGCCTCATTTATAGCTTTCCTCTCATATTTCATGCCACATGGGGGAAAAAAGGAAATGATTGTGGTAGAA
ENSMUSG00000015222	Map2	3576	25	123	100	GACTTAGCCTCATTTATAGCTTTCCTCTCATATTTCATGCCACATGGGGGAAAAAAGGAAATGATTGTGGTAGAAGTAGCAAAGTAAAAGTAGATTAATC
ENSMUSG00000015222	Map2	3576	25	124	100	TCTCATATTTCATGCCACATGGGGGAAAAAAGGAAATGATTGTGGTAGAAGTAGCAAAGTAAAAGTAGATTAATCATTTGGAAAAGGCAAATTTCAGGCA
ENSMUSG00000015222	Map2	3576	25	125	100	AAAAAAGGAAATGATTGTGGTAGAAGTAGCAAAGTAAAAGTAGATTAATCATTTGGAAAAGGCAAATTTCAGGCATTTCTCCAAGATTGATGTGCTAAAA
ENSMUSG00000015222	Map2	3576	25	126	100	GTAGCAAAGTAAAAGTAGATTAATCATTTGGAAAAGGCAAATTTCAGGCATTTCTCCAAGATTGATGTGCTAAAATTAATACTTATGTTTGTGTTTTTAC
ENSMUSG00000015222	Map2	3576	25	127	100	ATTTGGAAAAGGCAAATTTCAGGCATTTCTCCAAGATTGATGTGCTAAAATTAATACTTATGTTTGTGTTTTTACACCTAGAAGTTTTAGCCTGGACATG
ENSMUSG00000015222	Map2	3576	25	128	100	TTTCTCCAAGATTGATGTGCTAAAATTAATACTTATGTTTGTGTTTTTACACCTAGAAGTTTTAGCCTGGACATGTAGATTGAGGCCAAGTCCCTCTGTA
ENSMUSG00000015222	Map2	3576	25	129	100	TTAATACTTATGTTTGTGTTTTTACACCTAGAAGTTTTAGCCTGGACATGTAGATTGAGGCCAAGTCCCTCTGTAGGAAAAGGTTTTTTTTTTTTTTCAA
ENSMUSG00000015222	Map2	3576	25	130	100	ACCTAGAAGTTTTAGCCTGGACATGTAGATTGAGGCCAAGTCCCTCTGTAGGAAAAGGTTTTTTTTTTTTTTCAAAACCCCTAAAAAAAATGCCAATCAT
ENSMUSG00000015222	Map2	3576	25	131	100	TAGATTGAGGCCAAGTCCCTCTGTAGGAAAAGGTTTTTTTTTTTTTTCAAAACCCCTAAAAAAAATGCCAATCATGAAAGTCCACTTCAACTTTAGCAAA
ENSMUSG00000015222	Map2	3576	25	132	100	GGAAAAGGTTTTTTTTTTTTTTCAAAACCCCTAAAAAAAATGCCAATCATGAAAGTCCACTTCAACTTTAGCAAAAAGGGGGGAAAATTCAACAAAAAGT
ENSMUSG00000015222	Map2	3576	25	133	100	AACCCCTAAAAAAAATGCCAATCATGAAAGTCCACTTCAACTTTAGCAAAAAGGGGGGAAAATTCAACAAAAAGTATACTCTGTATGCTGGGATCCCAAG
ENSMUSG00000015222	Map2	3576	25	134	100	GAAAGTCCACTTCAACTTTAGCAAAAAGGGGGGAAAATTCAACAAAAAGTATACTCTGTATGCTGGGATCCCAAGGTTTCAACACACCATCTGTGGGGGG
ENSMUSG00000015222	Map2	3576	25	135	100	AAGGGGGGAAAATTCAACAAAAAGTATACTCTGTATGCTGGGATCCCAAGGTTTCAACACACCATCTGTGGGGGGTTCTTTCTTCTGATAATTCTAGAGC
ENSMUSG00000015222	Map2	3576	25	136	100	ATACTCTGTATGCTGGGATCCCAAGGTTTCAACACACCATCTGTGGGGGGTTCTTTCTTCTGATAATTCTAGAGCCTGTTACCATAGAAAGGTATTTCTT
ENSMUSG00000015222	Map2	3576	25	137	100	GTTTCAACACACCATCTGTGGGGGGTTCTTTCTTCTGATAATTCTAGAGCCTGTTACCATAGAAAGGTATTTCTTCAATGGCTGGTTGTAGTTAGTTCAT
ENSMUSG00000015222	Map2	3576	25	138	100	TTCTTTCTTCTGATAATTCTAGAGCCTGTTACCATAGAAAGGTATTTCTTCAATGGCTGGTTGTAGTTAGTTCATGTTTTTCAATCAATTTGCAAATGTA
ENSMUSG00000015222	Map2	3576	25	139	100	CTGTTACCATAGAAAGGTATTTCTTCAATGGCTGGTTGTAGTTAGTTCATGTTTTTCAATCAATTTGCAAATGTATTTGTTGCTGTATAGTGATTGTTTT
ENSMUSG00000015222	Map2	3576	25	140	101	CAATGGCTGGTTGTAGTTAGTTCATGTTTTTCAATCAATTTGCAAATGTATTTGTTGCTGTATAGTGATTGTTTTGCAAAATAAAATTGCTTGTCACCTAA
ENSMUSG00000016252	Atp5e	153	15	1	75	CTGAATCTGAAGCCTGAAGTGCTGAGTCTTGAAGGTGAAGCATGTGGGCCCCTGTTCTGGCAGATGGAAATCAAC
ENSMUSG00000016252	Atp5e	153	15	2	75	GAAGTGCTGAGTCTTGAAGGTGAAGCATGTGGGCCCCTGTTCTGGCAGATGGAAATCAACCTCACCTCCTGGGGG
ENSMUSG00000016252	Atp5e	153	15	3	75	GAAGGTGAAGCATGTGGGCCCCTGTTCTGGCAGATGGAAATCAACCTCACCTCCTGGGGGACAGGCTGCCCATCT
ENSMUSG00000016252	Atp5e	153	15	4	75	GGGCCCCTGTTCTGGCAGATGGAAATCAACCTCACCTCCTGGGGGACAGGCTGCCCATCTCGTTGATAAATTGAC
ENSMUSG00000016252	Atp5e	153	15	5	75	CAGATGGAAATCAACCTCACCTCCTGGGGGACAGGCTGCCCATCTCGTTGATAAATTGACTATGCCAATAAATTA
ENSMUSG00000016252	Atp5e	153	15	6	78	CTCACCTCCTGGGGGACAGGCTGCCCATCTCGTTGATAAATTGACTATGCCAATAAATTAACATGGTTCACTTTCTGC
ENSMUSG00000016427	Ndufa1	133	15	1	75	GGAAGCATTTTCCTGGCTGATTAAAAGAAATTACTCAGCTATGGTCATCTGTTCCTGTTAGAAGGCTATGCAGCA
ENSMUSG00000016427	Ndufa1	133	15	2	75	GCTGATTAAAAGAAATTACTCAGCTATGGTCATCTGTTCCTGTTAGAAGGCTATGCAGCATATTATATACTATGC
ENSMUSG00000016427	Ndufa1	133	15	3	75	TTACTCAGCTATGGTCATCTGTTCCTGTTAGAAGGCTATGCAGCATATTATATACTATGCGCATGTTATGAAATG
ENSMUSG00000016427	Ndufa1	133	15	4	75	CATCTGTTCCTGTTAGAAGGCTATGCAGCATATTATATACTATGCGCATGTTATGAAATGCATAATAAAAAATTT
ENSMUSG00000016427	Ndufa1	133	15	5	73	GAAGGCTATGCAGCATATTATATACTATGCGCATGTTATGAAATGCATAATAAAAAATTTTAAAAAATCTAAA
ENSMUSG00000017778	Cox7c	119	15	1	75	GGATATTTAATTCATCCCTTTAACAGAATGAAGAAAGTTTAAGAGATGATCTGAAAATTGGATTAAACTCTTGAA
ENSMUSG00000017778	Cox7c	119	15	2	75	CCCTTTAACAGAATGAAGAAAGTTTAAGAGATGATCTGAAAATTGGATTAAACTCTTGAACTCTTATACTAGAAA
ENSMUSG00000017778	Cox7c	119	15	3	75	AAGAAAGTTTAAGAGATGATCTGAAAATTGGATTAAACTCTTGAACTCTTATACTAGAAAAAATTGTAAATAAAC
ENSMUSG00000017778	Cox7c	119	15	4	74	ATGATCTGAAAATTGGATTAAACTCTTGAACTCTTATACTAGAAAAAATTGTAAATAAACTAATGACATAAAGA
ENSMUSG00000018593	Sparc	1085	25	1	100	GTTCACGCCTCCTGCTGCAGTCCTGAACTCTCTCCCTCTGATGTGTCCCCCCTCCCATTACCCCCTTGTTTAAAATGTTTGGATGGTTGGCTGTTCCGCC
ENSMUSG00000018593	Sparc	1085	25	2	100	AACTCTCTCCCTCTGATGTGTCCCCCCTCCCATTACCCCCTTGTTTAAAATGTTTGGATGGTTGGCTGTTCCGCCTGGGGATAAGGTGCTAACATAGATT
ENSMUSG00000018593	Sparc	1085	25	3	100	CCTCCCATTACCCCCTTGTTTAAAATGTTTGGATGGTTGGCTGTTCCGCCTGGGGATAAGGTGCTAACATAGATTTAACTGAATACATTAACGGTGCTAA
ENSMUSG00000018593	Sparc	1085	25	4	100	TGTTTGGATGGTTGGCTGTTCCGCCTGGGGATAAGGTGCTAACATAGATTTAACTGAATACATTAACGGTGCTAAAAAAAAAAAAAAAACAAAGTAAGAA
ENSMUSG00000018593	Sparc	1085	25	5	100	TGGGGATAAGGTGCTAACATAGATTTAACTGAATACATTAACGGTGCTAAAAAAAAAAAAAAAACAAAGTAAGAAAGAAACTAGAACCCAAGTCACAGCA
ENSMUSG00000018593	Sparc	1085	25	6	100	TAACTGAATACATTAACGGTGCTAAAAAAAAAAAAAAAACAAAGTAAGAAAGAAACTAGAACCCAAGTCACAGCATTTTCCCACATAACTCTGAGGCCAT
ENSMUSG00000018593	Sparc	1085	25	7	100	AAAAAAAAAAAAAACAAAGTAAGAAAGAAACTAGAACCCAAGTCACAGCATTTTCCCACATAACTCTGAGGCCATGGCCCATCCACAGCCTCCTGGTCCC
ENSMUSG00000018593	Sparc	1085	25	8	100	AGAAACTAGAACCCAAGTCACAGCATTTTCCCACATAACTCTGAGGCCATGGCCCATCCACAGCCTCCTGGTCCCCTGCACTACCCAGTGTCTCACTGGC
ENSMUSG00000018593	Sparc	1085	25	9	100	TTTTCCCACATAACTCTGAGGCCATGGCCCATCCACAGCCTCCTGGTCCCCTGCACTACCCAGTGTCTCACTGGCTGTGTTGGAAACGGAGTTGCATAAG
ENSMUSG00000018593	Sparc	1085	25	10	100	GGCCCATCCACAGCCTCCTGGTCCCCTGCACTACCCAGTGTCTCACTGGCTGTGTTGGAAACGGAGTTGCATAAGCTCACCGTCCACAAGCACGAGGAGA
ENSMUSG00000018593	Sparc	1085	25	11	100	CTGCACTACCCAGTGTCTCACTGGCTGTGTTGGAAACGGAGTTGCATAAGCTCACCGTCCACAAGCACGAGGAGATATCTCTAGCTTTCATTTCTGTTTT
ENSMUSG00000018593	Sparc	1085	25	12	100	TGTGTTGGAAACGGAGTTGCATAAGCTCACCGTCCACAAGCACGAGGAGATATCTCTAGCTTTCATTTCTGTTTTGCATTTGACTCTTAACACTCACCCA
ENSMUSG00000018593	Sparc	1085	25	13	100	CTCACCGTCCACAAGCACGAGGAGATATCTCTAGCTTTCATTTCTGTTTTGCATTTGACTCTTAACACTCACCCAGACTCTGTGCTTATTTCATTTTGGG
ENSMUSG00000018593	Sparc	1085	25	14	100	TATCTCTAGCTTTCATTTCTGTTTTGCATTTGACTCTTAACACTCACCCAGACTCTGTGCTTATTTCATTTTGGGGGATGTGGGCTTTTTCCCCTGGTGG
ENSMUSG00000018593	Sparc	1085	25	15	100	GCATTTGACTCTTAACACTCACCCAGACTCTGTGCTTATTTCATTTTGGGGGATGTGGGCTTTTTCCCCTGGTGGTTTGGAGTTAGGCAGAGGGAAGTTA
ENSMUSG00000018593	Sparc	1085	25	16	100	GACTCTGTGCTTATTTCATTTTGGGGGATGTGGGCTTTTTCCCCTGGTGGTTTGGAGTTAGGCAGAGGGAAGTTACAGACACAGGTACAAAATTTGGGTA
ENSMUSG00000018593	Sparc	1085	25	17	100	GGATGTGGGCTTTTTCCCCTGGTGGTTTGGAGTTAGGCAGAGGGAAGTTACAGACACAGGTACAAAATTTGGGTAAAGATGCTGTGAGACCTGAGGACCC
ENSMUSG00000018593	Sparc	1085	25	18	100	TTTGGAGTTAGGCAGAGGGAAGTTACAGACACAGGTACAAAATTTGGGTAAAGATGCTGTGAGACCTGAGGACCCACCAGTCAGAACCCACATGGCAAGT
ENSMUSG00000018593	Sparc	1085	25	19	100	CAGACACAGGTACAAAATTTGGGTAAAGATGCTGTGAGACCTGAGGACCCACCAGTCAGAACCCACATGGCAAGTCTTAGTAGCCTAGGTCAAGGAAAGA
ENSMUSG00000018593	Sparc	1085	25	20	100	AAGATGCTGTGAGACCTGAGGACCCACCAGTCAGAACCCACATGGCAAGTCTTAGTAGCCTAGGTCAAGGAAAGACAGAATAATCCAGAGCTGTGGCACA
ENSMUSG00000018593	Sparc	1085	25	21	100	ACCAGTCAGAACCCACATGGCAAGTCTTAGTAGCCTAGGTCAAGGAAAGACAGAATAATCCAGAGCTGTGGCACACATGACAGACTCCCAGCAGCCCGGG
ENSMUSG00000018593	Sparc	1085	25	22	100	CTTAGTAGCCTAGGTCAAGGAAAGACAGAATAATCCAGAGCTGTGGCACACATGACAGACTCCCAGCAGCCCGGGACCTTGCTGTCTTCTCGACTCTTAG
ENSMUSG00000018593	Sparc	1085	25	23	100	CAGAATAATCCAGAGCTGTGGCACACATGACAGACTCCCAGCAGCCCGGGACCTTGCTGTCTTCTCGACTCTTAGGGCGTTTCTTTCCATGTTTGGCTGT
ENSMUSG00000018593	Sparc	1085	25	24	100	CATGACAGACTCCCAGCAGCCCGGGACCTTGCTGTCTTCTCGACTCTTAGGGCGTTTCTTTCCATGTTTGGCTGTTGGTTTTAGTTTTGGTGAGCCATGG
ENSMUSG00000018593	Sparc	1085	25	25	100	ACCTTGCTGTCTTCTCGACTCTTAGGGCGTTTCTTTCCATGTTTGGCTGTTGGTTTTAGTTTTGGTGAGCCATGGGTGGGCCAGAACATCACTCAACTGC
ENSMUSG00000018593	Sparc	1085	25	26	100	GGCGTTTCTTTCCATGTTTGGCTGTTGGTTTTAGTTTTGGTGAGCCATGGGTGGGCCAGAACATCACTCAACTGCAATTGGGCTTTCAGGTTCTTGCCGG
ENSMUSG00000018593	Sparc	1085	25	27	100	TGGTTTTAGTTTTGGTGAGCCATGGGTGGGCCAGAACATCACTCAACTGCAATTGGGCTTTCAGGTTCTTGCCGGGAGCTCTAGGCACTGGGAGGCTGTT
ENSMUSG00000018593	Sparc	1085	25	28	100	GTGGGCCAGAACATCACTCAACTGCAATTGGGCTTTCAGGTTCTTGCCGGGAGCTCTAGGCACTGGGAGGCTGTTTCAGGAAAGTGAGACTCAAGAGGAA
ENSMUSG00000018593	Sparc	1085	25	29	100	AATTGGGCTTTCAGGTTCTTGCCGGGAGCTCTAGGCACTGGGAGGCTGTTTCAGGAAAGTGAGACTCAAGAGGAAGACAGAAAAGGTTGTAACGTAGAGG
ENSMUSG00000018593	Sparc	1085	25	30	100	GAGCTCTAGGCACTGGGAGGCTGTTTCAGGAAAGTGAGACTCAAGAGGAAGACAGAAAAGGTTGTAACGTAGAGGAAGTGAGACTGGTGAATTGGTTTGA
ENSMUSG00000018593	Sparc	1085	25	31	100	TCAGGAAAGTGAGACTCAAGAGGAAGACAGAAAAGGTTGTAACGTAGAGGAAGTGAGACTGGTGAATTGGTTTGATTTTTTTCACATCTAGATGGCTGTC
ENSMUSG00000018593	Sparc	1085	25	32	100	GACAGAAAAGGTTGTAACGTAGAGGAAGTGAGACTGGTGAATTGGTTTGATTTTTTTCACATCTAGATGGCTGTCATAAAGTTTCTAGCATGTTCCCCCT
ENSMUSG00000018593	Sparc	1085	25	33	100	AAGTGAGACTGGTGAATTGGTTTGATTTTTTTCACATCTAGATGGCTGTCATAAAGTTTCTAGCATGTTCCCCCTCACCTCTCCCCACCCCCTGCCACTT
ENSMUSG00000018593	Sparc	1085	25	34	100	TTTTTTTCACATCTAGATGGCTGTCATAAAGTTTCTAGCATGTTCCCCCTCACCTCTCCCCACCCCCTGCCACTTGAAACCTTCTACTAATCAAGAGAAA
ENSMUSG00000018593	Sparc	1085	25	35	100	ATAAAGTTTCTAGCATGTTCCCCCTCACCTCTCCCCACCCCCTGCCACTTGAAACCTTCTACTAATCAAGAGAAACTTCCAAGCCAACGGAATGGTCAGA
ENSMUSG00000018593	Sparc	1085	25	36	100	CACCTCTCCCCACCCCCTGCCACTTGAAACCTTCTACTAATCAAGAGAAACTTCCAAGCCAACGGAATGGTCAGATCTCACAGGCTGAGAAATTGTTCCC
ENSMUSG00000018593	Sparc	1085	25	37	100	GAAACCTTCTACTAATCAAGAGAAACTTCCAAGCCAACGGAATGGTCAGATCTCACAGGCTGAGAAATTGTTCCCCTCCAAGCATTTCATGAAAAAGCTG
ENSMUSG00000018593	Sparc	1085	25	38	100	CTTCCAAGCCAACGGAATGGTCAGATCTCACAGGCTGAGAAATTGTTCCCCTCCAAGCATTTCATGAAAAAGCTGCTTCTCATTAACCATGCAAACTCTC
ENSMUSG00000018593	Sparc	1085	25	39	100	TCTCACAGGCTGAGAAATTGTTCCCCTCCAAGCATTTCATGAAAAAGCTGCTTCTCATTAACCATGCAAACTCTCACAGCAATGTGAAGAGCTTGACAAG
ENSMUSG00000018593	Sparc	1085	25	40	110	CTCCAAGCATTTCATGAAAAAGCTGCTTCTCATTAACCATGCAAACTCTCACAGCAATGTGAAGAGCTTGACAAGTCTTTCAAAATAAAAAGTAACAACTTAGAAACGGC
ENSMUSG00000018819	Lsp1	649	25	1	100	ACCATGTTTGCATCCTGGATAGACTCCGGCCGGATGCCACTCCCAGCCCTGACCAAGAAATTGCTTCCTGTTGCCAGTCTGGCCTGCTCTCCTGCCTCCA
ENSMUSG00000018819	Lsp1	649	25	2	100	CCGGCCGGATGCCACTCCCAGCCCTGACCAAGAAATTGCTTCCTGTTGCCAGTCTGGCCTGCTCTCCTGCCTCCAACAACCAAGCTGCCGATAGCCTCTC
ENSMUSG00000018819	Lsp1	649	25	3	100	GACCAAGAAATTGCTTCCTGTTGCCAGTCTGGCCTGCTCTCCTGCCTCCAACAACCAAGCTGCCGATAGCCTCTCCTTTTGCTCCTGGACCCTCCATCTT
ENSMUSG00000018819	Lsp1	649	25	4	100	AGTCTGGCCTGCTCTCCTGCCTCCAACAACCAAGCTGCCGATAGCCTCTCCTTTTGCTCCTGGACCCTCCATCTTCTCTTCCCTCTCATCCTTTGACCAA
ENSMUSG00000018819	Lsp1	649	25	5	100	ACAACCAAGCTGCCGATAGCCTCTCCTTTTGCTCCTGGACCCTCCATCTTCTCTTCCCTCTCATCCTTTGACCAACCCTCCAACTCTGCTTCTCACCATC
ENSMUSG00000018819	Lsp1	649	25	6	100	CTTTTGCTCCTGGACCCTCCATCTTCTCTTCCCTCTCATCCTTTGACCAACCCTCCAACTCTGCTTCTCACCATCAGCTAAAGGGACCAGTCCCTAGGGG
ENSMUSG00000018819	Lsp1	649	25	7	100	CTCTTCCCTCTCATCCTTTGACCAACCCTCCAACTCTGCTTCTCACCATCAGCTAAAGGGACCAGTCCCTAGGGGAGCCAAGAGCTCCCAAGGAAGGATG
ENSMUSG00000018819	Lsp1	649	25	8	100	CCCTCCAACTCTGCTTCTCACCATCAGCTAAAGGGACCAGTCCCTAGGGGAGCCAAGAGCTCCCAAGGAAGGATGAAGGAGAGAAGGCAAGCATCCCAAC
ENSMUSG00000018819	Lsp1	649	25	9	100	AGCTAAAGGGACCAGTCCCTAGGGGAGCCAAGAGCTCCCAAGGAAGGATGAAGGAGAGAAGGCAAGCATCCCAACCAGATCCAAGGGGACACTGTCCCCA
ENSMUSG00000018819	Lsp1	649	25	10	100	AGCCAAGAGCTCCCAAGGAAGGATGAAGGAGAGAAGGCAAGCATCCCAACCAGATCCAAGGGGACACTGTCCCCATGCTGAATGCTCAGGACTCTTGGGT
ENSMUSG00000018819	Lsp1	649	25	11	100	AAGGAGAGAAGGCAAGCATCCCAACCAGATCCAAGGGGACACTGTCCCCATGCTGAATGCTCAGGACTCTTGGGTCCTGCCCTGTTTACGGATCCCTCAT
ENSMUSG00000018819	Lsp1	649	25	12	100	CAGATCCAAGGGGACACTGTCCCCATGCTGAATGCTCAGGACTCTTGGGTCCTGCCCTGTTTACGGATCCCTCATTTTGTGTAATAAAGTGCATTGAGTG
ENSMUSG00000018819	Lsp1	649	25	13	100	TGCTGAATGCTCAGGACTCTTGGGTCCTGCCCTGTTTACGGATCCCTCATTTTGTGTAATAAAGTGCATTGAGTGTCCCCTATGCATTTGGATCTCCTGT
ENSMUSG00000018819	Lsp1	649	25	14	100	CCTGCCCTGTTTACGGATCCCTCATTTTGTGTAATAAAGTGCATTGAGTGTCCCCTATGCATTTGGATCTCCTGTGCTCACTAACAGGGAACACGGTGAT
ENSMUSG00000018819	Lsp1	649	25	15	100	TTTGTGTAATAAAGTGCATTGAGTGTCCCCTATGCATTTGGATCTCCTGTGCTCACTAACAGGGAACACGGTGATCAAAACAGAAAGGGCCATATCTGTT
ENSMUSG00000018819	Lsp1	649	25	16	100	TCCCCTATGCATTTGGATCTCCTGTGCTCACTAACAGGGAACACGGTGATCAAAACAGAAAGGGCCATATCTGTTGGCCACTTGAGACTTGATCAGCTCT
ENSMUSG00000018819	Lsp1	649	25	17	100	GCTCACTAACAGGGAACACGGTGATCAAAACAGAAAGGGCCATATCTGTTGGCCACTTGAGACTTGATCAGCTCTGTGGGCAACCACTCTGTCTTGTCTT
ENSMUSG00000018819	Lsp1	649	25	18	100	CAAAACAGAAAGGGCCATATCTGTTGGCCACTTGAGACTTGATCAGCTCTGTGGGCAACCACTCTGTCTTGTCTTTTGGCCTTGCAGTGTGTTATGTTCC
ENSMUSG00000018819	Lsp1	649	25	19	100	GGCCACTTGAGACTTGATCAGCTCTGTGGGCAACCACTCTGTCTTGTCTTTTGGCCTTGCAGTGTGTTATGTTCCAGGATCTGAGGTATGAGGTGACCCA
ENSMUSG00000018819	Lsp1	649	25	20	100	GTGGGCAACCACTCTGTCTTGTCTTTTGGCCTTGCAGTGTGTTATGTTCCAGGATCTGAGGTATGAGGTGACCCAAGCTGGGGTATTAATAATGGATGTG
ENSMUSG00000018819	Lsp1	649	25	21	100	TTGGCCTTGCAGTGTGTTATGTTCCAGGATCTGAGGTATGAGGTGACCCAAGCTGGGGTATTAATAATGGATGTGGCCTACTCCTCTTCCAGAACATGAC
ENSMUSG00000018819	Lsp1	649	25	22	100	AGGATCTGAGGTATGAGGTGACCCAAGCTGGGGTATTAATAATGGATGTGGCCTACTCCTCTTCCAGAACATGACACTTTGATGACCCTTCCTTACTTGG
ENSMUSG00000018819	Lsp1	649	25	23	99	AGCTGGGGTATTAATAATGGATGTGGCCTACTCCTCTTCCAGAACATGACACTTTGATGACCCTTCCTTACTTGGACCAAAATAAACCTGAACAAGGGC
ENSMUSG00000019820	Utrn	2000	25	1	100	GCATCTATCCAGCCAGCCAACATTTCCCGACCTTCAGTATTGCCCTCTTCTGCAAATGCCAATCCCAAGACCCATTCAACCCCAAAGCTCCGTGGCTCCA
ENSMUSG00000019820	Utrn	2000	25	2	100	CCCGACCTTCAGTATTGCCCTCTTCTGCAAATGCCAATCCCAAGACCCATTCAACCCCAAAGCTCCGTGGCTCCACGACACAAGCTGTTGAGTGCTTACT
ENSMUSG00000019820	Utrn	2000	25	3	100	TGCAAATGCCAATCCCAAGACCCATTCAACCCCAAAGCTCCGTGGCTCCACGACACAAGCTGTTGAGTGCTTACTGGGTGTTCTACTGAGGGAACCAAAC
ENSMUSG00000019820	Utrn	2000	25	4	100	TCAACCCCAAAGCTCCGTGGCTCCACGACACAAGCTGTTGAGTGCTTACTGGGTGTTCTACTGAGGGAACCAAACACTGACTATCCAAAGAGAAAAGGAT
ENSMUSG00000019820	Utrn	2000	25	5	100	CGACACAAGCTGTTGAGTGCTTACTGGGTGTTCTACTGAGGGAACCAAACACTGACTATCCAAAGAGAAAAGGATATTTTGGTTTTCTAATAACGTATAT
ENSMUSG00000019820	Utrn	2000	25	6	100	GGGTGTTCTACTGAGGGAACCAAACACTGACTATCCAAAGAGAAAAGGATATTTTGGTTTTCTAATAACGTATATTATTGTTTTCTTCTCCCCTTTCTAT
ENSMUSG00000019820	Utrn	2000	25	7	100	ACTGACTATCCAAAGAGAAAAGGATATTTTGGTTTTCTAATAACGTATATTATTGTTTTCTTCTCCCCTTTCTATGCAACTGTAAATTAATGAACAGAGA
ENSMUSG00000019820	Utrn	2000	25	8	100	ATTTTGGTTTTCTAATAACGTATATTATTGTTTTCTTCTCCCCTTTCTATGCAACTGTAAATTAATGAACAGAGAAGTATTTGGAGGTGGTAAAGCATTT
ENSMUSG00000019820	Utrn	2000	25	9	100	TATTGTTTTCTTCTCCCCTTTCTATGCAACTGTAAATTAATGAACAGAGAAGTATTTGGAGGTGGTAAAGCATTTGTCACTGATTTGTATAATATATACA
ENSMUSG00000019820	Utrn	2000	25	10	100	GCAACTGTAAATTAATGAACAGAGAAGTATTTGGAGGTGGTAAAGCATTTGTCACTGATTTGTATAATATATACAGCCATGGGAAAGTGGGTGGGGGCTT
ENSMUSG00000019820	Utrn	2000	25	11	100	AGTATTTGGAGGTGGTAAAGCATTTGTCACTGATTTGTATAATATATACAGCCATGGGAAAGTGGGTGGGGGCTTTCTAATATGAAACTGTCTTTTTAAT
ENSMUSG00000019820	Utrn	2000	25	12	100	GTCACTGATTTGTATAATATATACAGCCATGGGAAAGTGGGTGGGGGCTTTCTAATATGAAACTGTCTTTTTAATAACCAAGAGAAAAAATTGCATAAGA
ENSMUSG00000019820	Utrn	2000	25	13	100	GCCATGGGAAAGTGGGTGGGGGCTTTCTAATATGAAACTGTCTTTTTAATAACCAAGAGAAAAAATTGCATAAGAATTAGACCACTTTACATTATTACAT
ENSMUSG00000019820	Utrn	2000	25	14	100	TCTAATATGAAACTGTCTTTTTAATAACCAAGAGAAAAAATTGCATAAGAATTAGACCACTTTACATTATTACATTCCTTCTGCTGTTCACATTAACCTT
ENSMUSG00000019820	Utrn	2000	25	15	100	AACCAAGAGAAAAAATTGCATAAGAATTAGACCACTTTACATTATTACATTCCTTCTGCTGTTCACATTAACCTTGTACAATAACTTCACTTATTATTTG
ENSMUSG00000019820	Utrn	2000	25	16	100	ATTAGACCACTTTACATTATTACATTCCTTCTGCTGTTCACATTAACCTTGTACAATAACTTCACTTATTATTTGACTGTTTTACCATTATGTTTTGGTT
ENSMUSG00000019820	Utrn	2000	25	17	100	TCCTTCTGCTGTTCACATTAACCTTGTACAATAACTTCACTTATTATTTGACTGTTTTACCATTATGTTTTGGTTATTTATAAATTTATCAGCCATACAA
ENSMUSG00000019820	Utrn	2000	25	18	100	GTACAATAACTTCACTTATTATTTGACTGTTTTACCATTATGTTTTGGTTATTTATAAATTTATCAGCCATACAAACAAATAGATTCTATGTATTTGTTT
ENSMUSG00000019820	Utrn	2000	25	19	100	ACTGTTTTACCATTATGTTTTGGTTATTTATAAATTTATCAGCCATACAAACAAATAGATTCTATGTATTTGTTTCTATAATCTGGCCAAATTCCTAAGT
ENSMUSG00000019820	Utrn	2000	25	20	100	ATTTATAAATTTATCAGCCATACAAACAAATAGATTCTATGTATTTGTTTCTATAATCTGGCCAAATTCCTAAGTTCATATATTTGAATCAAATATTTTA
ENSMUSG00000019820	Utrn	2000	25	21	100	ACAAATAGATTCTATGTATTTGTTTCTATAATCTGGCCAAATTCCTAAGTTCATATATTTGAATCAAATATTTTACATATGTGGAGTAGGCAGGCATTCT
ENSMUSG00000019820	Utrn	2000	25	22	100	CTATAATCTGGCCAAATTCCTAAGTTCATATATTTGAATCAAATATTTTACATATGTGGAGTAGGCAGGCATTCTGAAGATACTATTTAACTTTAGTTGA
ENSMUSG00000019820	Utrn	2000	25	23	100	TCATATATTTGAATCAAATATTTTACATATGTGGAGTAGGCAGGCATTCTGAAGATACTATTTAACTTTAGTTGACGTCACACACACCATCCTTTAGTAA
ENSMUSG00000019820	Utrn	2000	25	24	100	CATATGTGGAGTAGGCAGGCATTCTGAAGATACTATTTAACTTTAGTTGACGTCACACACACCATCCTTTAGTAACCACTGGATGACTACACTAAAAATC
ENSMUSG00000019820	Utrn	2000	25	25	100	GAAGATACTATTTAACTTTAGTTGACGTCACACACACCATCCTTTAGTAACCACTGGATGACTACACTAAAAATCCTGTGGACTTTAACGGCAAGCTGCT
ENSMUSG00000019820	Utrn	2000	25	26	100	CGTCACACACACCATCCTTTAGTAACCACTGGATGACTACACTAAAAATCCTGTGGACTTTAACGGCAAGCTGCTGGGGTATTTTTCCTCCTGTTTTTAT
ENSMUSG00000019820	Utrn	2000	25	27	100	CCACTGGATGACTACACTAAAAATCCTGTGGACTTTAACGGCAAGCTGCTGGGGTATTTTTCCTCCTGTTTTTATTCCTTTTTTGTAAGTAGATCTTGAC
ENSMUSG00000019820	Utrn	2000	25	28	100	CTGTGGACTTTAACGGCAAGCTGCTGGGGTATTTTTCCTCCTGTTTTTATTCCTTTTTTGTAAGTAGATCTTGACGTCTTTATTTATTTCATCTTGCAAT
ENSMUSG00000019820	Utrn	2000	25	29	100	GGGGTATTTTTCCTCCTGTTTTTATTCCTTTTTTGTAAGTAGATCTTGACGTCTTTATTTATTTCATCTTGCAATCTCTATAATAAAGAAGACTGTATTG
ENSMUSG00000019820	Utrn	2000	25	30	100	TCCTTTTTTGTAAGTAGATCTTGACGTCTTTATTTATTTCATCTTGCAATCTCTATAATAAAGAAGACTGTATTGTAATAGTCTCAAAAAATTATTTTAC
ENSMUSG00000019820	Utrn	2000	25	31	100	GTCTTTATTTATTTCATCTTGCAATCTCTATAATAAAGAAGACTGTATTGTAATAGTCTCAAAAAATTATTTTACCAAGGGTTACCATTTAAGCATATTT
ENSMUSG00000019820	Utrn	2000	25	32	100	CTCTATAATAAAGAAGACTGTATTGTAATAGTCTCAAAAAATTATTTTACCAAGGGTTACCATTTAAGCATATTTTCATTTTGATTCAGAAACCAAAGTT
ENSMUSG00000019820	Utrn	2000	25	33	100	TAATAGTCTCAAAAAATTATTTTACCAAGGGTTACCATTTAAGCATATTTTCATTTTGATTCAGAAACCAAAGTTGGTACAACCTCTCCTAGTACTTGCA
ENSMUSG00000019820	Utrn	2000	25	34	100	CAAGGGTTACCATTTAAGCATATTTTCATTTTGATTCAGAAACCAAAGTTGGTACAACCTCTCCTAGTACTTGCAACCTTGGTTTTCATGAGAAAACACA
ENSMUSG00000019820	Utrn	2000	25	35	100	TCATTTTGATTCAGAAACCAAAGTTGGTACAACCTCTCCTAGTACTTGCAACCTTGGTTTTCATGAGAAAACACACGGCAGGCTTTGCCCATTGTGAGGA
ENSMUSG00000019820	Utrn	2000	25	36	100	GGTACAACCTCTCCTAGTACTTGCAACCTTGGTTTTCATGAGAAAACACACGGCAGGCTTTGCCCATTGTGAGGAGAGCACACATCATGCTCTTCAGTTT
ENSMUSG00000019820	Utrn	2000	25	37	100	ACCTTGGTTTTCATGAGAAAACACACGGCAGGCTTTGCCCATTGTGAGGAGAGCACACATCATGCTCTTCAGTTTCCTTTGAATAGACTTTTATTGTTGT
ENSMUSG00000019820	Utrn	2000	25	38	100	CGGCAGGCTTTGCCCATTGTGAGGAGAGCACACATCATGCTCTTCAGTTTCCTTTGAATAGACTTTTATTGTTGTTTTTGTATTTTTCGAGTCCTGTGTA
ENSMUSG00000019820	Utrn	2000	25	39	100	GAGCACACATCATGCTCTTCAGTTTCCTTTGAATAGACTTTTATTGTTGTTTTTGTATTTTTCGAGTCCTGTGTAAGTTTTGAAAGCTCTGGTTGTTTCC
ENSMUSG00000019820	Utrn	2000	25	40	100	CCTTTGAATAGACTTTTATTGTTGTTTTTGTATTTTTCGAGTCCTGTGTAAGTTTTGAAAGCTCTGGTTGTTTCCTTTGTGAAAGCAGGCAGATACTTAT
ENSMUSG00000019820	Utrn	2000	25	41	100	TTTTGTATTTTTCGAGTCCTGTGTAAGTTTTGAAAGCTCTGGTTGTTTCCTTTGTGAAAGCAGGCAGATACTTATTGGCTGTCTCATTTGAAGCTTTGGA
ENSMUSG00000019820	Utrn	2000	25	42	100	AGTTTTGAAAGCTCTGGTTGTTTCCTTTGTGAAAGCAGGCAGATACTTATTGGCTGTCTCATTTGAAGCTTTGGAGCAGATAGTCAGATGTCTCATGACC
ENSMUSG00000019820	Utrn	2000	25	43	100	TTTGTGAAAGCAGGCAGATACTTATTGGCTGTCTCATTTGAAGCTTTGGAGCAGATAGTCAGATGTCTCATGACCCCTCACTTGGCCAGCAGCACATCCG
ENSMUSG00000019820	Utrn	2000	25	44	100	TGGCTGTCTCATTTGAAGCTTTGGAGCAGATAGTCAGATGTCTCATGACCCCTCACTTGGCCAGCAGCACATCCGAGAAGGATGTCACTCACAAGCCTAC
ENSMUSG00000019820	Utrn	2000	25	45	100	GCAGATAGTCAGATGTCTCATGACCCCTCACTTGGCCAGCAGCACATCCGAGAAGGATGTCACTCACAAGCCTACACCACGGCTTCTCTAGAATGAAATC
ENSMUSG00000019820	Utrn	2000	25	46	100	CCTCACTTGGCCAGCAGCACATCCGAGAAGGATGTCACTCACAAGCCTACACCACGGCTTCTCTAGAATGAAATCAGTGCTCGGATGATTGTATCCCTGC
ENSMUSG00000019820	Utrn	2000	25	47	100	AGAAGGATGTCACTCACAAGCCTACACCACGGCTTCTCTAGAATGAAATCAGTGCTCGGATGATTGTATCCCTGCCTCTACTTCTGAGTGTGTTCAACTA
ENSMUSG00000019820	Utrn	2000	25	48	100	ACCACGGCTTCTCTAGAATGAAATCAGTGCTCGGATGATTGTATCCCTGCCTCTACTTCTGAGTGTGTTCAACTAGGTATTGGCTTCTTTTTCTTTTTCT
ENSMUSG00000019820	Utrn	2000	25	49	100	AGTGCTCGGATGATTGTATCCCTGCCTCTACTTCTGAGTGTGTTCAACTAGGTATTGGCTTCTTTTTCTTTTTCTTTTCTTTTTTTTTTAATTTAACACT
ENSMUSG00000019820	Utrn	2000	25	50	100	CTCTACTTCTGAGTGTGTTCAACTAGGTATTGGCTTCTTTTTCTTTTTCTTTTCTTTTTTTTTTAATTTAACACTTAATTGCCGATTTTAGAGAAACCAA
ENSMUSG00000019820	Utrn	2000	25	51	100	GGTATTGGCTTCTTTTTCTTTTTCTTTTCTTTTTTTTTTAATTTAACACTTAATTGCCGATTTTAGAGAAACCAAAAATAAAGGTGAAGGTAATATGTTT
ENSMUSG00000019820	Utrn	2000	25	52	100	TTTCTTTTTTTTTTAATTTAACACTTAATTGCCGATTTTAGAGAAACCAAAAATAAAGGTGAAGGTAATATGTTTTGATTCAAACATATATGCTTTTAAA
ENSMUSG00000019820	Utrn	2000	25	53	100	TAATTGCCGATTTTAGAGAAACCAAAAATAAAGGTGAAGGTAATATGTTTTGATTCAAACATATATGCTTTTAAAACATCAGGACATGCTAACTTTGGGT
ENSMUSG00000019820	Utrn	2000	25	54	100	AAATAAAGGTGAAGGTAATATGTTTTGATTCAAACATATATGCTTTTAAAACATCAGGACATGCTAACTTTGGGTTCTCTTTCACTGGGATCTGGCCAGA
ENSMUSG00000019820	Utrn	2000	25	55	100	TGATTCAAACATATATGCTTTTAAAACATCAGGACATGCTAACTTTGGGTTCTCTTTCACTGGGATCTGGCCAGAAGGAGGCTGAAAGTTAGAAATTGCT
ENSMUSG00000019820	Utrn	2000	25	56	100	ACATCAGGACATGCTAACTTTGGGTTCTCTTTCACTGGGATCTGGCCAGAAGGAGGCTGAAAGTTAGAAATTGCTATTCTTTTAGGATCGGTTGGGTGGG
ENSMUSG00000019820	Utrn	2000	25	57	100	TCTCTTTCACTGGGATCTGGCCAGAAGGAGGCTGAAAGTTAGAAATTGCTATTCTTTTAGGATCGGTTGGGTGGGTTGGGGGGCAAGGGTGTCTATTTGC
ENSMUSG00000019820	Utrn	2000	25	58	100	AGGAGGCTGAAAGTTAGAAATTGCTATTCTTTTAGGATCGGTTGGGTGGGTTGGGGGGCAAGGGTGTCTATTTGCAGCATAGATATTTTGAGACGAAGAA
ENSMUSG00000019820	Utrn	2000	25	59	100	ATTCTTTTAGGATCGGTTGGGTGGGTTGGGGGGCAAGGGTGTCTATTTGCAGCATAGATATTTTGAGACGAAGAAAATTGTTTTATATAAGGGGAGAGCC
ENSMUSG00000019820	Utrn	2000	25	60	100	TTGGGGGGCAAGGGTGTCTATTTGCAGCATAGATATTTTGAGACGAAGAAAATTGTTTTATATAAGGGGAGAGCCATGATCACCTTTCTACCTCAGAACC
ENSMUSG00000019820	Utrn	2000	25	61	100	AGCATAGATATTTTGAGACGAAGAAAATTGTTTTATATAAGGGGAGAGCCATGATCACCTTTCTACCTCAGAACCACCTTCCTCCATTGTGTTGGACATA
ENSMUSG00000019820	Utrn	2000	25	62	100	AATTGTTTTATATAAGGGGAGAGCCATGATCACCTTTCTACCTCAGAACCACCTTCCTCCATTGTGTTGGACATAGCTTTATATGCCGCAGTGTGCAAAA
ENSMUSG00000019820	Utrn	2000	25	63	100	ATGATCACCTTTCTACCTCAGAACCACCTTCCTCCATTGTGTTGGACATAGCTTTATATGCCGCAGTGTGCAAAACCTAGGGCTGTAGTCAGGCCTTTCC
ENSMUSG00000019820	Utrn	2000	25	64	100	ACCTTCCTCCATTGTGTTGGACATAGCTTTATATGCCGCAGTGTGCAAAACCTAGGGCTGTAGTCAGGCCTTTCCATACCCAGGAAGCACCTGTGTAAAG
ENSMUSG00000019820	Utrn	2000	25	65	100	GCTTTATATGCCGCAGTGTGCAAAACCTAGGGCTGTAGTCAGGCCTTTCCATACCCAGGAAGCACCTGTGTAAAGAAGATCAACAGAAACTCCCGGAACT
ENSMUSG00000019820	Utrn	2000	25	66	100	CCTAGGGCTGTAGTCAGGCCTTTCCATACCCAGGAAGCACCTGTGTAAAGAAGATCAACAGAAACTCCCGGAACTCAGAACCCCAAGTTGTAGATTTGGT
ENSMUSG00000019820	Utrn	2000	25	67	100	ATACCCAGGAAGCACCTGTGTAAAGAAGATCAACAGAAACTCCCGGAACTCAGAACCCCAAGTTGTAGATTTGGTGTCGTCCTTGTTCTTGCTTTGAGGA
ENSMUSG00000019820	Utrn	2000	25	68	100	AAGATCAACAGAAACTCCCGGAACTCAGAACCCCAAGTTGTAGATTTGGTGTCGTCCTTGTTCTTGCTTTGAGGAGTCATGTATTCTTTTATTTCCTGCC
ENSMUSG00000019820	Utrn	2000	25	69	100	CAGAACCCCAAGTTGTAGATTTGGTGTCGTCCTTGTTCTTGCTTTGAGGAGTCATGTATTCTTTTATTTCCTGCCTGTATTTGTATGCAAAATGATCTCT
ENSMUSG00000019820	Utrn	2000	25	70	100	GTCGTCCTTGTTCTTGCTTTGAGGAGTCATGTATTCTTTTATTTCCTGCCTGTATTTGTATGCAAAATGATCTCTATCTGCTATTACAGAAAAAGCTACA
ENSMUSG00000019820	Utrn	2000	25	71	100	GTCATGTATTCTTTTATTTCCTGCCTGTATTTGTATGCAAAATGATCTCTATCTGCTATTACAGAAAAAGCTACACAAAACACTACATTGTAACCTTCTG
ENSMUSG00000019820	Utrn	2000	25	72	100	TGTATTTGTATGCAAAATGATCTCTATCTGCTATTACAGAAAAAGCTACACAAAACACTACATTGTAACCTTCTGAGTAATAAATAAGAGGAAATATATT
ENSMUSG00000019820	Utrn	2000	25	73	100	ATCTGCTATTACAGAAAAAGCTACACAAAACACTACATTGTAACCTTCTGAGTAATAAATAAGAGGAAATATATTACAGTAACCATGATGAGAAATAAGT
ENSMUSG00000019820	Utrn	2000	25	74	100	CAAAACACTACATTGTAACCTTCTGAGTAATAAATAAGAGGAAATATATTACAGTAACCATGATGAGAAATAAGTGTATTGTTCTTTTGAAATATGTGGT
ENSMUSG00000019820	Utrn	2000	25	75	100	AGTAATAAATAAGAGGAAATATATTACAGTAACCATGATGAGAAATAAGTGTATTGTTCTTTTGAAATATGTGGTTAATCGCAGACTGTCATCTAATCTG
ENSMUSG00000019820	Utrn	2000	25	76	100	ACAGTAACCATGATGAGAAATAAGTGTATTGTTCTTTTGAAATATGTGGTTAATCGCAGACTGTCATCTAATCTGTTACATACCGTATTTTTCATCCTGA
ENSMUSG00000019820	Utrn	2000	25	77	100	GTATTGTTCTTTTGAAATATGTGGTTAATCGCAGACTGTCATCTAATCTGTTACATACCGTATTTTTCATCCTGAATAAAAGTAATTTTAACACAAAATG
ENSMUSG00000020022	Ndufa12	582	25	1	100	CCGCAGTGAAGACTGTTCCTGCACTTCCAGGCTAGTGCAGGACCATCCTAGCAGCTGACCATGAACTTGATTAAAATTGTTTGACCTAGCAGTGTCTTGT
ENSMUSG00000020022	Ndufa12	582	25	2	100	TCCAGGCTAGTGCAGGACCATCCTAGCAGCTGACCATGAACTTGATTAAAATTGTTTGACCTAGCAGTGTCTTGTGCGTTCACACCGTCATTCATCCCCT
ENSMUSG00000020022	Ndufa12	582	25	3	100	GCAGCTGACCATGAACTTGATTAAAATTGTTTGACCTAGCAGTGTCTTGTGCGTTCACACCGTCATTCATCCCCTGCAAAGTAGAAGCTCGCACATGAGG
ENSMUSG00000020022	Ndufa12	582	25	4	100	ATTGTTTGACCTAGCAGTGTCTTGTGCGTTCACACCGTCATTCATCCCCTGCAAAGTAGAAGCTCGCACATGAGGGAGGGAGGTGACTGACATAGATCTC
ENSMUSG00000020022	Ndufa12	582	25	5	100	GCGTTCACACCGTCATTCATCCCCTGCAAAGTAGAAGCTCGCACATGAGGGAGGGAGGTGACTGACATAGATCTCTGGGGCGGGGGATGGGAGTGGGGGG
ENSMUSG00000020022	Ndufa12	582	25	6	100	GCAAAGTAGAAGCTCGCACATGAGGGAGGGAGGTGACTGACATAGATCTCTGGGGCGGGGGATGGGAGTGGGGGGTCTGAAGTAAAGTTCCCAGTTCTAG
ENSMUSG00000020022	Ndufa12	582	25	7	100	GAGGGAGGTGACTGACATAGATCTCTGGGGCGGGGGATGGGAGTGGGGGGTCTGAAGTAAAGTTCCCAGTTCTAGGAAATAGCCCCAGGGGACCTGTTTG
ENSMUSG00000020022	Ndufa12	582	25	8	100	TGGGGCGGGGGATGGGAGTGGGGGGTCTGAAGTAAAGTTCCCAGTTCTAGGAAATAGCCCCAGGGGACCTGTTTGTGTTTCATGATCTTCCCCGACTTCC
ENSMUSG00000020022	Ndufa12	582	25	9	100	TCTGAAGTAAAGTTCCCAGTTCTAGGAAATAGCCCCAGGGGACCTGTTTGTGTTTCATGATCTTCCCCGACTTCCATGGCTGGTTGATAAGGGCAGGCTG
ENSMUSG00000020022	Ndufa12	582	25	10	100	GAAATAGCCCCAGGGGACCTGTTTGTGTTTCATGATCTTCCCCGACTTCCATGGCTGGTTGATAAGGGCAGGCTGCATTCCAACCTGAGCCAGACATTGG
ENSMUSG00000020022	Ndufa12	582	25	11	100	TGTTTCATGATCTTCCCCGACTTCCATGGCTGGTTGATAAGGGCAGGCTGCATTCCAACCTGAGCCAGACATTGGTAAGCTTCGTGGAGAGACACAAACA
ENSMUSG00000020022	Ndufa12	582	25	12	100	ATGGCTGGTTGATAAGGGCAGGCTGCATTCCAACCTGAGCCAGACATTGGTAAGCTTCGTGGAGAGACACAAACACCGAGTGGCAGCCTGGCTCAGACTC
ENSMUSG00000020022	Ndufa12	582	25	13	100	CATTCCAACCTGAGCCAGACATTGGTAAGCTTCGTGGAGAGACACAAACACCGAGTGGCAGCCTGGCTCAGACTCTGGTGTGGCTCTGTATGGAGGAGGT
ENSMUSG00000020022	Ndufa12	582	25	14	100	TAAGCTTCGTGGAGAGACACAAACACCGAGTGGCAGCCTGGCTCAGACTCTGGTGTGGCTCTGTATGGAGGAGGTTATTGGAGATGTCCTATTTCCTTCC
ENSMUSG00000020022	Ndufa12	582	25	15	100	CCGAGTGGCAGCCTGGCTCAGACTCTGGTGTGGCTCTGTATGGAGGAGGTTATTGGAGATGTCCTATTTCCTTCCCCACCCCACTCCCCCTTTGGTTTTT
ENSMUSG00000020022	Ndufa12	582	25	16	100	TGGTGTGGCTCTGTATGGAGGAGGTTATTGGAGATGTCCTATTTCCTTCCCCACCCCACTCCCCCTTTGGTTTTTTGAGATAGGATTTCTTTATGTGGCT
ENSMUSG00000020022	Ndufa12	582	25	17	100	TATTGGAGATGTCCTATTTCCTTCCCCACCCCACTCCCCCTTTGGTTTTTTGAGATAGGATTTCTTTATGTGGCTCTGGATGTTTTGGAACTCACTTTGT
ENSMUSG00000020022	Ndufa12	582	25	18	100	CCACCCCACTCCCCCTTTGGTTTTTTGAGATAGGATTTCTTTATGTGGCTCTGGATGTTTTGGAACTCACTTTGTAGACTAGGCTAGCCTTGAACTCAAA
ENSMUSG00000020022	Ndufa12	582	25	19	100	TGAGATAGGATTTCTTTATGTGGCTCTGGATGTTTTGGAACTCACTTTGTAGACTAGGCTAGCCTTGAACTCAAAAGATCTACCTGCCTGTGCCTCCCAA
ENSMUSG00000020022	Ndufa12	582	25	20	107	CTGGATGTTTTGGAACTCACTTTGTAGACTAGGCTAGCCTTGAACTCAAAAGATCTACCTGCCTGTGCCTCCCAAGTGCTGGTATTAAAAGGTGTCCACTAAAACCA
ENSMUSG00000020163	Uqcr11	189	15	1	75	GCAGCCCCTCCCCCACCACAGGCCTCGATGGTACCATGTGCCGAGGCCTCAGACACAGCGTAGTCCTGTGGAAGA
ENSMUSG00000020163	Uqcr11	189	15	2	75	CCACAGGCCTCGATGGTACCATGTGCCGAGGCCTCAGACACAGCGTAGTCCTGTGGAAGACACTGAGGAAGCTGG
ENSMUSG00000020163	Uqcr11	189	15	3	75	GTACCATGTGCCGAGGCCTCAGACACAGCGTAGTCCTGTGGAAGACACTGAGGAAGCTGGACACTGGAGAGGTCT
ENSMUSG00000020163	Uqcr11	189	15	4	75	GCCTCAGACACAGCGTAGTCCTGTGGAAGACACTGAGGAAGCTGGACACTGGAGAGGTCTGCACCGCTCAGGGAG
ENSMUSG00000020163	Uqcr11	189	15	5	75	TAGTCCTGTGGAAGACACTGAGGAAGCTGGACACTGGAGAGGTCTGCACCGCTCAGGGAGCTTCCATGTTGACAG
ENSMUSG00000020163	Uqcr11	189	15	6	75	CACTGAGGAAGCTGGACACTGGAGAGGTCTGCACCGCTCAGGGAGCTTCCATGTTGACAGACACTAGGGCTGCCT
ENSMUSG00000020163	Uqcr11	189	15	7	75	ACACTGGAGAGGTCTGCACCGCTCAGGGAGCTTCCATGTTGACAGACACTAGGGCTGCCTTGATGGGTGCAGCAT
ENSMUSG00000020163	Uqcr11	189	15	8	75	GCACCGCTCAGGGAGCTTCCATGTTGACAGACACTAGGGCTGCCTTGATGGGTGCAGCATTAAACCTTATTCTTA
ENSMUSG00000020163	Uqcr11	189	15	9	69	CTTCCATGTTGACAGACACTAGGGCTGCCTTGATGGGTGCAGCATTAAACCTTATTCTTATGCCTTGGA
ENSMUSG00000020431	Adcy1	8791	25	1	100	TGGAGCCCATGGGCCACTGGAGATGCATGCAAGGCAAGAATGCTCCAGGGTGTCACAAGCCACCATGGCTCTAGCCAGGACCAGACAGAGGAGCCAAGTG
ENSMUSG00000020431	Adcy1	8791	25	2	100	CATGCAAGGCAAGAATGCTCCAGGGTGTCACAAGCCACCATGGCTCTAGCCAGGACCAGACAGAGGAGCCAAGTGGCTGGGCTGGAGGAGAAGCATTGTC
ENSMUSG00000020431	Adcy1	8791	25	3	100	TGTCACAAGCCACCATGGCTCTAGCCAGGACCAGACAGAGGAGCCAAGTGGCTGGGCTGGAGGAGAAGCATTGTCTGAGTGTGGCCTGAGGCCAATGGGA
ENSMUSG00000020431	Adcy1	8791	25	4	100	CAGGACCAGACAGAGGAGCCAAGTGGCTGGGCTGGAGGAGAAGCATTGTCTGAGTGTGGCCTGAGGCCAATGGGAAATGTGCCCAAGCCACCCCTTGGGG
ENSMUSG00000020431	Adcy1	8791	25	5	100	GCTGGGCTGGAGGAGAAGCATTGTCTGAGTGTGGCCTGAGGCCAATGGGAAATGTGCCCAAGCCACCCCTTGGGGCACACTGAGCTCTGTCTCTTCCTAA
ENSMUSG00000020431	Adcy1	8791	25	6	100	TGAGTGTGGCCTGAGGCCAATGGGAAATGTGCCCAAGCCACCCCTTGGGGCACACTGAGCTCTGTCTCTTCCTAATGACCTGGTTATGCCTGGCTAGTGT
ENSMUSG00000020431	Adcy1	8791	25	7	100	AATGTGCCCAAGCCACCCCTTGGGGCACACTGAGCTCTGTCTCTTCCTAATGACCTGGTTATGCCTGGCTAGTGTTGCCATAGGTGGCGGGACCTTGGGA
ENSMUSG00000020431	Adcy1	8791	25	8	100	CACACTGAGCTCTGTCTCTTCCTAATGACCTGGTTATGCCTGGCTAGTGTTGCCATAGGTGGCGGGACCTTGGGAGTATCTTCCATGGTCACAGCAAAAG
ENSMUSG00000020431	Adcy1	8791	25	9	100	TGACCTGGTTATGCCTGGCTAGTGTTGCCATAGGTGGCGGGACCTTGGGAGTATCTTCCATGGTCACAGCAAAAGCTATGGAGGTCAAGCTGGCAGAGGA
ENSMUSG00000020431	Adcy1	8791	25	10	100	TGCCATAGGTGGCGGGACCTTGGGAGTATCTTCCATGGTCACAGCAAAAGCTATGGAGGTCAAGCTGGCAGAGGAGCCCACCATGACTGAGCCCCAAGTC
ENSMUSG00000020431	Adcy1	8791	25	11	100	GTATCTTCCATGGTCACAGCAAAAGCTATGGAGGTCAAGCTGGCAGAGGAGCCCACCATGACTGAGCCCCAAGTCAACTGGCTTATGGGTGGCTCCAGCC
ENSMUSG00000020431	Adcy1	8791	25	12	100	CTATGGAGGTCAAGCTGGCAGAGGAGCCCACCATGACTGAGCCCCAAGTCAACTGGCTTATGGGTGGCTCCAGCCCTGGTAAGCCCTGGCTTATGGGTGG
ENSMUSG00000020431	Adcy1	8791	25	13	100	GCCCACCATGACTGAGCCCCAAGTCAACTGGCTTATGGGTGGCTCCAGCCCTGGTAAGCCCTGGCTTATGGGTGGCTCTAGCCCTGGTAGGTCCTGGCTT
ENSMUSG00000020431	Adcy1	8791	25	14	100	AACTGGCTTATGGGTGGCTCCAGCCCTGGTAAGCCCTGGCTTATGGGTGGCTCTAGCCCTGGTAGGTCCTGGCTTATGGGTGGCTCCAGCCCTGGTAAGC
ENSMUSG00000020431	Adcy1	8791	25	15	100	CTGGTAAGCCCTGGCTTATGGGTGGCTCTAGCCCTGGTAGGTCCTGGCTTATGGGTGGCTCCAGCCCTGGTAAGCCCTGGCTTATGGATGGCTCTAGCCC
ENSMUSG00000020431	Adcy1	8791	25	16	100	CTCTAGCCCTGGTAGGTCCTGGCTTATGGGTGGCTCCAGCCCTGGTAAGCCCTGGCTTATGGATGGCTCTAGCCCTGGTAGGTCCTGGCTTATGGGTAAC
ENSMUSG00000020431	Adcy1	8791	25	17	100	ATGGGTGGCTCCAGCCCTGGTAAGCCCTGGCTTATGGATGGCTCTAGCCCTGGTAGGTCCTGGCTTATGGGTAACTCCAAGCCTGGGTAGCAGTTTCAAG
ENSMUSG00000020431	Adcy1	8791	25	18	100	CCTGGCTTATGGATGGCTCTAGCCCTGGTAGGTCCTGGCTTATGGGTAACTCCAAGCCTGGGTAGCAGTTTCAAGTATGAGTGCCAGACTGGGAAGTTGG
ENSMUSG00000020431	Adcy1	8791	25	19	100	TGGTAGGTCCTGGCTTATGGGTAACTCCAAGCCTGGGTAGCAGTTTCAAGTATGAGTGCCAGACTGGGAAGTTGGCCCCGCTGGGCAGGGCCATGACAGT
ENSMUSG00000020431	Adcy1	8791	25	20	100	TCCAAGCCTGGGTAGCAGTTTCAAGTATGAGTGCCAGACTGGGAAGTTGGCCCCGCTGGGCAGGGCCATGACAGTTGAGCTGTTCATACCATGGGCACAG
ENSMUSG00000020431	Adcy1	8791	25	21	100	TATGAGTGCCAGACTGGGAAGTTGGCCCCGCTGGGCAGGGCCATGACAGTTGAGCTGTTCATACCATGGGCACAGCAAAGAGCTGGTCAGGTCTTGGTCA
ENSMUSG00000020431	Adcy1	8791	25	22	100	CCCCGCTGGGCAGGGCCATGACAGTTGAGCTGTTCATACCATGGGCACAGCAAAGAGCTGGTCAGGTCTTGGTCAGGGCAGTATGGGAAGAATTGAAAAG
ENSMUSG00000020431	Adcy1	8791	25	23	100	TGAGCTGTTCATACCATGGGCACAGCAAAGAGCTGGTCAGGTCTTGGTCAGGGCAGTATGGGAAGAATTGAAAAGACACCTCTTACTGCATGAAGAGCGG
ENSMUSG00000020431	Adcy1	8791	25	24	100	CAAAGAGCTGGTCAGGTCTTGGTCAGGGCAGTATGGGAAGAATTGAAAAGACACCTCTTACTGCATGAAGAGCGGGGTTGCTGGCTTTCCCCAAGAGTAG
ENSMUSG00000020431	Adcy1	8791	25	25	100	GGGCAGTATGGGAAGAATTGAAAAGACACCTCTTACTGCATGAAGAGCGGGGTTGCTGGCTTTCCCCAAGAGTAGGCTCTTGCTAACAGCCAGAGGCAGG
ENSMUSG00000020431	Adcy1	8791	25	26	100	ACACCTCTTACTGCATGAAGAGCGGGGTTGCTGGCTTTCCCCAAGAGTAGGCTCTTGCTAACAGCCAGAGGCAGGTCTTCTGGAATTCTCGGGAGGCCCT
ENSMUSG00000020431	Adcy1	8791	25	27	100	GGTTGCTGGCTTTCCCCAAGAGTAGGCTCTTGCTAACAGCCAGAGGCAGGTCTTCTGGAATTCTCGGGAGGCCCTACAGCCCCACTTCTGATCTCCTGGC
ENSMUSG00000020431	Adcy1	8791	25	28	100	GCTCTTGCTAACAGCCAGAGGCAGGTCTTCTGGAATTCTCGGGAGGCCCTACAGCCCCACTTCTGATCTCCTGGCCCGTACATTCTCTTCCAACCCCTCC
ENSMUSG00000020431	Adcy1	8791	25	29	100	TCTTCTGGAATTCTCGGGAGGCCCTACAGCCCCACTTCTGATCTCCTGGCCCGTACATTCTCTTCCAACCCCTCCTGGCTGCTGGCTTCTGACTGCTGCG
ENSMUSG00000020431	Adcy1	8791	25	30	100	ACAGCCCCACTTCTGATCTCCTGGCCCGTACATTCTCTTCCAACCCCTCCTGGCTGCTGGCTTCTGACTGCTGCGACAGTGGGCCCTCCTCTTCCTGTGC
ENSMUSG00000020431	Adcy1	8791	25	31	100	CCGTACATTCTCTTCCAACCCCTCCTGGCTGCTGGCTTCTGACTGCTGCGACAGTGGGCCCTCCTCTTCCTGTGCCATGGCTGCACATTCAGAGAGGAGG
ENSMUSG00000020431	Adcy1	8791	25	32	100	TGGCTGCTGGCTTCTGACTGCTGCGACAGTGGGCCCTCCTCTTCCTGTGCCATGGCTGCACATTCAGAGAGGAGGGGTGTGTGCTGTCTTCTCTGTGGTG
ENSMUSG00000020431	Adcy1	8791	25	33	100	ACAGTGGGCCCTCCTCTTCCTGTGCCATGGCTGCACATTCAGAGAGGAGGGGTGTGTGCTGTCTTCTCTGTGGTGTCTTGGACGCTGTAAGTCTAACAAG
ENSMUSG00000020431	Adcy1	8791	25	34	100	CATGGCTGCACATTCAGAGAGGAGGGGTGTGTGCTGTCTTCTCTGTGGTGTCTTGGACGCTGTAAGTCTAACAAGAATCAAGCCTTCGTTTATGCTAAGA
ENSMUSG00000020431	Adcy1	8791	25	35	100	GGTGTGTGCTGTCTTCTCTGTGGTGTCTTGGACGCTGTAAGTCTAACAAGAATCAAGCCTTCGTTTATGCTAAGAGCGATTGACCCACTATACCCACGAG
ENSMUSG00000020431	Adcy1	8791	25	36	100	TCTTGGACGCTGTAAGTCTAACAAGAATCAAGCCTTCGTTTATGCTAAGAGCGATTGACCCACTATACCCACGAGTGCTCTCCTTGCTGGAAGACATCCT
ENSMUSG00000020431	Adcy1	8791	25	37	100	AATCAAGCCTTCGTTTATGCTAAGAGCGATTGACCCACTATACCCACGAGTGCTCTCCTTGCTGGAAGACATCCTCTCCTTGGCCTAACCAGCTCTCCTC
ENSMUSG00000020431	Adcy1	8791	25	38	100	GCGATTGACCCACTATACCCACGAGTGCTCTCCTTGCTGGAAGACATCCTCTCCTTGGCCTAACCAGCTCTCCTCTTGGTGGTTTCAGAGTCGGCACAGT
ENSMUSG00000020431	Adcy1	8791	25	39	100	TGCTCTCCTTGCTGGAAGACATCCTCTCCTTGGCCTAACCAGCTCTCCTCTTGGTGGTTTCAGAGTCGGCACAGTGTGCATTCCTGAGTCTAGGTGTGGT
ENSMUSG00000020431	Adcy1	8791	25	40	100	CTCCTTGGCCTAACCAGCTCTCCTCTTGGTGGTTTCAGAGTCGGCACAGTGTGCATTCCTGAGTCTAGGTGTGGTGTCCCTGCTCCAGGGTGATGGGAAA
ENSMUSG00000020431	Adcy1	8791	25	41	100	TTGGTGGTTTCAGAGTCGGCACAGTGTGCATTCCTGAGTCTAGGTGTGGTGTCCCTGCTCCAGGGTGATGGGAAAGAGTGGCCCTGTTGACTGACACCTG
ENSMUSG00000020431	Adcy1	8791	25	42	100	GTGCATTCCTGAGTCTAGGTGTGGTGTCCCTGCTCCAGGGTGATGGGAAAGAGTGGCCCTGTTGACTGACACCTGGGACCTCCCACCTGTGTGTCCCAGT
ENSMUSG00000020431	Adcy1	8791	25	43	100	GTCCCTGCTCCAGGGTGATGGGAAAGAGTGGCCCTGTTGACTGACACCTGGGACCTCCCACCTGTGTGTCCCAGTAACTGCAACTGTGAGGAAATCCCGT
ENSMUSG00000020431	Adcy1	8791	25	44	100	GAGTGGCCCTGTTGACTGACACCTGGGACCTCCCACCTGTGTGTCCCAGTAACTGCAACTGTGAGGAAATCCCGTTAGGGTACAGGATTCTGGAGGAGTT
ENSMUSG00000020431	Adcy1	8791	25	45	100	GGACCTCCCACCTGTGTGTCCCAGTAACTGCAACTGTGAGGAAATCCCGTTAGGGTACAGGATTCTGGAGGAGTTGGTAGGAAGCAACTGGCTGGAAATA
ENSMUSG00000020431	Adcy1	8791	25	46	100	AACTGCAACTGTGAGGAAATCCCGTTAGGGTACAGGATTCTGGAGGAGTTGGTAGGAAGCAACTGGCTGGAAATAGCGGGATGAAGCCTGGCTTTTGAAG
ENSMUSG00000020431	Adcy1	8791	25	47	100	TAGGGTACAGGATTCTGGAGGAGTTGGTAGGAAGCAACTGGCTGGAAATAGCGGGATGAAGCCTGGCTTTTGAAGATACTCAGTTTCAATACAGGAAGGG
ENSMUSG00000020431	Adcy1	8791	25	48	100	GGTAGGAAGCAACTGGCTGGAAATAGCGGGATGAAGCCTGGCTTTTGAAGATACTCAGTTTCAATACAGGAAGGGAGGCAGCTTGAAGCAGGGCAGGTGG
ENSMUSG00000020431	Adcy1	8791	25	49	100	GCGGGATGAAGCCTGGCTTTTGAAGATACTCAGTTTCAATACAGGAAGGGAGGCAGCTTGAAGCAGGGCAGGTGGGCATAAGCCCTGCCTGATCTTGTCT
ENSMUSG00000020431	Adcy1	8791	25	50	100	ATACTCAGTTTCAATACAGGAAGGGAGGCAGCTTGAAGCAGGGCAGGTGGGCATAAGCCCTGCCTGATCTTGTCTGTGGAGGCCCATTTCCTCACGGCTC
ENSMUSG00000020431	Adcy1	8791	25	51	100	AGGCAGCTTGAAGCAGGGCAGGTGGGCATAAGCCCTGCCTGATCTTGTCTGTGGAGGCCCATTTCCTCACGGCTCCCCAAGAGCTTGCCCCCTTCCAAGG
ENSMUSG00000020431	Adcy1	8791	25	52	100	GCATAAGCCCTGCCTGATCTTGTCTGTGGAGGCCCATTTCCTCACGGCTCCCCAAGAGCTTGCCCCCTTCCAAGGGTCCTATCTTCTTAGAATAGGGCAG
ENSMUSG00000020431	Adcy1	8791	25	53	100	GTGGAGGCCCATTTCCTCACGGCTCCCCAAGAGCTTGCCCCCTTCCAAGGGTCCTATCTTCTTAGAATAGGGCAGAGCAAAGCCTAGTTTTCCCCGGCAG
ENSMUSG00000020431	Adcy1	8791	25	54	100	CCCAAGAGCTTGCCCCCTTCCAAGGGTCCTATCTTCTTAGAATAGGGCAGAGCAAAGCCTAGTTTTCCCCGGCAGGGTGCATATGTGGTGTTCTGGATTC
ENSMUSG00000020431	Adcy1	8791	25	55	100	GTCCTATCTTCTTAGAATAGGGCAGAGCAAAGCCTAGTTTTCCCCGGCAGGGTGCATATGTGGTGTTCTGGATTCAGCTCTGGTTCAAGTGTGTGGCTTT
ENSMUSG00000020431	Adcy1	8791	25	56	100	AGCAAAGCCTAGTTTTCCCCGGCAGGGTGCATATGTGGTGTTCTGGATTCAGCTCTGGTTCAAGTGTGTGGCTTTGTTGGTGCCTGGGTAATTTTCCAGG
ENSMUSG00000020431	Adcy1	8791	25	57	100	GGTGCATATGTGGTGTTCTGGATTCAGCTCTGGTTCAAGTGTGTGGCTTTGTTGGTGCCTGGGTAATTTTCCAGGTCAGCCAGCGCCCGTTCCTGGGACA
ENSMUSG00000020431	Adcy1	8791	25	58	100	AGCTCTGGTTCAAGTGTGTGGCTTTGTTGGTGCCTGGGTAATTTTCCAGGTCAGCCAGCGCCCGTTCCTGGGACACTCAGCTGAGTCTAGACTCAGGTTA
ENSMUSG00000020431	Adcy1	8791	25	59	100	GTTGGTGCCTGGGTAATTTTCCAGGTCAGCCAGCGCCCGTTCCTGGGACACTCAGCTGAGTCTAGACTCAGGTTACCTGTGGGTAGGAAGAAAACTTTCA
ENSMUSG00000020431	Adcy1	8791	25	60	100	TCAGCCAGCGCCCGTTCCTGGGACACTCAGCTGAGTCTAGACTCAGGTTACCTGTGGGTAGGAAGAAAACTTTCAGCAAGGGAGAGCTGGAGGCTGCATG
ENSMUSG00000020431	Adcy1	8791	25	61	100	CTCAGCTGAGTCTAGACTCAGGTTACCTGTGGGTAGGAAGAAAACTTTCAGCAAGGGAGAGCTGGAGGCTGCATGCCAAGTCTCCAAGTCTTTGAGGCTG
ENSMUSG00000020431	Adcy1	8791	25	62	100	CCTGTGGGTAGGAAGAAAACTTTCAGCAAGGGAGAGCTGGAGGCTGCATGCCAAGTCTCCAAGTCTTTGAGGCTGCACCTCAGGTGCCCTAGGGCCGGGT
ENSMUSG00000020431	Adcy1	8791	25	63	100	GCAAGGGAGAGCTGGAGGCTGCATGCCAAGTCTCCAAGTCTTTGAGGCTGCACCTCAGGTGCCCTAGGGCCGGGTGGGGCAGCTGTGAAGATTGCACATT
ENSMUSG00000020431	Adcy1	8791	25	64	100	CCAAGTCTCCAAGTCTTTGAGGCTGCACCTCAGGTGCCCTAGGGCCGGGTGGGGCAGCTGTGAAGATTGCACATTCTCTGTGGCCAGGGATGGAGCTTGT
ENSMUSG00000020431	Adcy1	8791	25	65	100	CACCTCAGGTGCCCTAGGGCCGGGTGGGGCAGCTGTGAAGATTGCACATTCTCTGTGGCCAGGGATGGAGCTTGTGGGTGGTGGTAAGGGTATCATCTAG
ENSMUSG00000020431	Adcy1	8791	25	66	100	GGGGCAGCTGTGAAGATTGCACATTCTCTGTGGCCAGGGATGGAGCTTGTGGGTGGTGGTAAGGGTATCATCTAGCACCTTCTGCAGAGGAACTCTGACC
ENSMUSG00000020431	Adcy1	8791	25	67	100	CTCTGTGGCCAGGGATGGAGCTTGTGGGTGGTGGTAAGGGTATCATCTAGCACCTTCTGCAGAGGAACTCTGACCCATGCCCACCCTGCTTTGTTGCCTT
ENSMUSG00000020431	Adcy1	8791	25	68	100	GGGTGGTGGTAAGGGTATCATCTAGCACCTTCTGCAGAGGAACTCTGACCCATGCCCACCCTGCTTTGTTGCCTTTCTGATGATATCAGGTAGCACGGCC
ENSMUSG00000020431	Adcy1	8791	25	69	100	CACCTTCTGCAGAGGAACTCTGACCCATGCCCACCCTGCTTTGTTGCCTTTCTGATGATATCAGGTAGCACGGCCTGGGCATTGTCGGCTGCCTTTCTGT
ENSMUSG00000020431	Adcy1	8791	25	70	100	CATGCCCACCCTGCTTTGTTGCCTTTCTGATGATATCAGGTAGCACGGCCTGGGCATTGTCGGCTGCCTTTCTGTCAGCCCACTGTGGCTAGAACCCAGA
ENSMUSG00000020431	Adcy1	8791	25	71	100	TCTGATGATATCAGGTAGCACGGCCTGGGCATTGTCGGCTGCCTTTCTGTCAGCCCACTGTGGCTAGAACCCAGAGCCAGGGCCAGACTGACTTCAGCAC
ENSMUSG00000020431	Adcy1	8791	25	72	100	TGGGCATTGTCGGCTGCCTTTCTGTCAGCCCACTGTGGCTAGAACCCAGAGCCAGGGCCAGACTGACTTCAGCACTCCACTGCAGCCTTCAGGGTTGGAG
ENSMUSG00000020431	Adcy1	8791	25	73	100	CAGCCCACTGTGGCTAGAACCCAGAGCCAGGGCCAGACTGACTTCAGCACTCCACTGCAGCCTTCAGGGTTGGAGAGCAGGTAGCTTCATCGTCCTCCGG
ENSMUSG00000020431	Adcy1	8791	25	74	100	GCCAGGGCCAGACTGACTTCAGCACTCCACTGCAGCCTTCAGGGTTGGAGAGCAGGTAGCTTCATCGTCCTCCGGTGGTCATGTCTGGTTCCTGAGGCGT
ENSMUSG00000020431	Adcy1	8791	25	75	100	TCCACTGCAGCCTTCAGGGTTGGAGAGCAGGTAGCTTCATCGTCCTCCGGTGGTCATGTCTGGTTCCTGAGGCGTGGTATTTTGTTGTAACAGTGTTGGG
ENSMUSG00000020431	Adcy1	8791	25	76	100	AGCAGGTAGCTTCATCGTCCTCCGGTGGTCATGTCTGGTTCCTGAGGCGTGGTATTTTGTTGTAACAGTGTTGGGGGAGAATGCTGGCTCCCAGAGAGTT
ENSMUSG00000020431	Adcy1	8791	25	77	100	TGGTCATGTCTGGTTCCTGAGGCGTGGTATTTTGTTGTAACAGTGTTGGGGGAGAATGCTGGCTCCCAGAGAGTTGAGGGCAGCAGGACAGGCTTTTGGT
ENSMUSG00000020431	Adcy1	8791	25	78	100	GGTATTTTGTTGTAACAGTGTTGGGGGAGAATGCTGGCTCCCAGAGAGTTGAGGGCAGCAGGACAGGCTTTTGGTTTCTCCCATGGCCCTGAAGACCATC
ENSMUSG00000020431	Adcy1	8791	25	79	100	GGAGAATGCTGGCTCCCAGAGAGTTGAGGGCAGCAGGACAGGCTTTTGGTTTCTCCCATGGCCCTGAAGACCATCTTAAGATTGCACTTATAAGAAAGAT
ENSMUSG00000020431	Adcy1	8791	25	80	100	GAGGGCAGCAGGACAGGCTTTTGGTTTCTCCCATGGCCCTGAAGACCATCTTAAGATTGCACTTATAAGAAAGATTCAGGTTGTTGGGGCGCTCTGAGAA
ENSMUSG00000020431	Adcy1	8791	25	81	100	TTCTCCCATGGCCCTGAAGACCATCTTAAGATTGCACTTATAAGAAAGATTCAGGTTGTTGGGGCGCTCTGAGAAGGGGCAGATTCCTCTGAGCCAGAAC
ENSMUSG00000020431	Adcy1	8791	25	82	100	TTAAGATTGCACTTATAAGAAAGATTCAGGTTGTTGGGGCGCTCTGAGAAGGGGCAGATTCCTCTGAGCCAGAACCTAGGTAGGCATGCGAGCACTCTTT
ENSMUSG00000020431	Adcy1	8791	25	83	100	TCAGGTTGTTGGGGCGCTCTGAGAAGGGGCAGATTCCTCTGAGCCAGAACCTAGGTAGGCATGCGAGCACTCTTTCTTTGTGGCTCCTGCCTCCTGCCCG
ENSMUSG00000020431	Adcy1	8791	25	84	100	GGGGCAGATTCCTCTGAGCCAGAACCTAGGTAGGCATGCGAGCACTCTTTCTTTGTGGCTCCTGCCTCCTGCCCGTCCCCAGGTGTTCCTATCCTTGGGA
ENSMUSG00000020431	Adcy1	8791	25	85	100	CTAGGTAGGCATGCGAGCACTCTTTCTTTGTGGCTCCTGCCTCCTGCCCGTCCCCAGGTGTTCCTATCCTTGGGACAAATGGCTTTTCCTCATGGGGCTC
ENSMUSG00000020431	Adcy1	8791	25	86	100	CTTTGTGGCTCCTGCCTCCTGCCCGTCCCCAGGTGTTCCTATCCTTGGGACAAATGGCTTTTCCTCATGGGGCTCTTTTGCACTAGGAATTTCTCACCTC
ENSMUSG00000020431	Adcy1	8791	25	87	100	TCCCCAGGTGTTCCTATCCTTGGGACAAATGGCTTTTCCTCATGGGGCTCTTTTGCACTAGGAATTTCTCACCTCGTCTGTCTGTCTTGCAGTCAGCTCA
ENSMUSG00000020431	Adcy1	8791	25	88	100	CAAATGGCTTTTCCTCATGGGGCTCTTTTGCACTAGGAATTTCTCACCTCGTCTGTCTGTCTTGCAGTCAGCTCAGCCAGGAGCACCCAGAGCAAGTGAG
ENSMUSG00000020431	Adcy1	8791	25	89	100	TTTTGCACTAGGAATTTCTCACCTCGTCTGTCTGTCTTGCAGTCAGCTCAGCCAGGAGCACCCAGAGCAAGTGAGTATATGGTGACTTTGGCTGAGGGCT
ENSMUSG00000020431	Adcy1	8791	25	90	100	GTCTGTCTGTCTTGCAGTCAGCTCAGCCAGGAGCACCCAGAGCAAGTGAGTATATGGTGACTTTGGCTGAGGGCTGTGGCACTGTCCCTGGCCTTCCAGG
ENSMUSG00000020431	Adcy1	8791	25	91	100	GCCAGGAGCACCCAGAGCAAGTGAGTATATGGTGACTTTGGCTGAGGGCTGTGGCACTGTCCCTGGCCTTCCAGGCCACTGAGGAGGGTAGAGAACCTCT
ENSMUSG00000020431	Adcy1	8791	25	92	100	TATATGGTGACTTTGGCTGAGGGCTGTGGCACTGTCCCTGGCCTTCCAGGCCACTGAGGAGGGTAGAGAACCTCTCACACAGCCTGGAGTTCCTCAGAGT
ENSMUSG00000020431	Adcy1	8791	25	93	100	GTGGCACTGTCCCTGGCCTTCCAGGCCACTGAGGAGGGTAGAGAACCTCTCACACAGCCTGGAGTTCCTCAGAGTGGCTTCTAGGCACCCAGAACTAGTG
ENSMUSG00000020431	Adcy1	8791	25	94	100	CCACTGAGGAGGGTAGAGAACCTCTCACACAGCCTGGAGTTCCTCAGAGTGGCTTCTAGGCACCCAGAACTAGTGCCTCTCTGGCTGATCAGATGAGGGA
ENSMUSG00000020431	Adcy1	8791	25	95	100	CACACAGCCTGGAGTTCCTCAGAGTGGCTTCTAGGCACCCAGAACTAGTGCCTCTCTGGCTGATCAGATGAGGGACAGAAGAGTGGTTCTCAAAGATGCC
ENSMUSG00000020431	Adcy1	8791	25	96	100	GGCTTCTAGGCACCCAGAACTAGTGCCTCTCTGGCTGATCAGATGAGGGACAGAAGAGTGGTTCTCAAAGATGCCCACATGACAGCCCCAGGTCCTGTGT
ENSMUSG00000020431	Adcy1	8791	25	97	100	CCTCTCTGGCTGATCAGATGAGGGACAGAAGAGTGGTTCTCAAAGATGCCCACATGACAGCCCCAGGTCCTGTGTGTCCTTTGCCACAGTGGAGGACCTT
ENSMUSG00000020431	Adcy1	8791	25	98	100	CAGAAGAGTGGTTCTCAAAGATGCCCACATGACAGCCCCAGGTCCTGTGTGTCCTTTGCCACAGTGGAGGACCTTGACAAGGGGACTTAGGGTAGGTAGG
ENSMUSG00000020431	Adcy1	8791	25	99	100	CACATGACAGCCCCAGGTCCTGTGTGTCCTTTGCCACAGTGGAGGACCTTGACAAGGGGACTTAGGGTAGGTAGGCCTGAAGGATTGAGAAAGGATTGAG
ENSMUSG00000020431	Adcy1	8791	25	100	100	GTCCTTTGCCACAGTGGAGGACCTTGACAAGGGGACTTAGGGTAGGTAGGCCTGAAGGATTGAGAAAGGATTGAGAAAGTCTACACCAATGGGTTTAGTG
ENSMUSG00000020431	Adcy1	8791	25	101	100	GACAAGGGGACTTAGGGTAGGTAGGCCTGAAGGATTGAGAAAGGATTGAGAAAGTCTACACCAATGGGTTTAGTGTGGACACAGGGCCCCTCAGAAGTGG
ENSMUSG00000020431	Adcy1	8791	25	102	100	CCTGAAGGATTGAGAAAGGATTGAGAAAGTCTACACCAATGGGTTTAGTGTGGACACAGGGCCCCTCAGAAGTGGACAGAAAGATGCCCAGGACTGAGTC
ENSMUSG00000020431	Adcy1	8791	25	103	100	AAAGTCTACACCAATGGGTTTAGTGTGGACACAGGGCCCCTCAGAAGTGGACAGAAAGATGCCCAGGACTGAGTCTCTGTTGCTGACCTGAAGATGAGGA
ENSMUSG00000020431	Adcy1	8791	25	104	100	TGGACACAGGGCCCCTCAGAAGTGGACAGAAAGATGCCCAGGACTGAGTCTCTGTTGCTGACCTGAAGATGAGGACATGAAATACATTGAAGAGACTTAG
ENSMUSG00000020431	Adcy1	8791	25	105	100	ACAGAAAGATGCCCAGGACTGAGTCTCTGTTGCTGACCTGAAGATGAGGACATGAAATACATTGAAGAGACTTAGGAGGACAGCACAGCTCCAGCCAGCA
ENSMUSG00000020431	Adcy1	8791	25	106	100	TCTGTTGCTGACCTGAAGATGAGGACATGAAATACATTGAAGAGACTTAGGAGGACAGCACAGCTCCAGCCAGCAAAGAAGCCAGGATGTCACGCACGCC
ENSMUSG00000020431	Adcy1	8791	25	107	100	CATGAAATACATTGAAGAGACTTAGGAGGACAGCACAGCTCCAGCCAGCAAAGAAGCCAGGATGTCACGCACGCCCATAACCACAAGGAGCTGAAACTGG
ENSMUSG00000020431	Adcy1	8791	25	108	100	GAGGACAGCACAGCTCCAGCCAGCAAAGAAGCCAGGATGTCACGCACGCCCATAACCACAAGGAGCTGAAACTGGCCAAAGCCTGAGTATACAGCAGGCA
ENSMUSG00000020431	Adcy1	8791	25	109	100	AAGAAGCCAGGATGTCACGCACGCCCATAACCACAAGGAGCTGAAACTGGCCAAAGCCTGAGTATACAGCAGGCAGACCATCAGAGCCATGAGGGAGGAG
ENSMUSG00000020431	Adcy1	8791	25	110	100	CATAACCACAAGGAGCTGAAACTGGCCAAAGCCTGAGTATACAGCAGGCAGACCATCAGAGCCATGAGGGAGGAGGCCAGCCAGTGGCCCCTGGATCTGA
ENSMUSG00000020431	Adcy1	8791	25	111	100	CCAAAGCCTGAGTATACAGCAGGCAGACCATCAGAGCCATGAGGGAGGAGGCCAGCCAGTGGCCCCTGGATCTGACCTATATGACGCTGAGCAGAGCCAG
ENSMUSG00000020431	Adcy1	8791	25	112	100	GACCATCAGAGCCATGAGGGAGGAGGCCAGCCAGTGGCCCCTGGATCTGACCTATATGACGCTGAGCAGAGCCAGCCTAGGTCGATAACACTGCAATCAC
ENSMUSG00000020431	Adcy1	8791	25	113	100	GCCAGCCAGTGGCCCCTGGATCTGACCTATATGACGCTGAGCAGAGCCAGCCTAGGTCGATAACACTGCAATCACGCATGCGTGTGTCAAACCGAGGCCA
ENSMUSG00000020431	Adcy1	8791	25	114	100	CCTATATGACGCTGAGCAGAGCCAGCCTAGGTCGATAACACTGCAATCACGCATGCGTGTGTCAAACCGAGGCCACATGGGTGCATGGGCAGAGCCACCC
ENSMUSG00000020431	Adcy1	8791	25	115	100	CCTAGGTCGATAACACTGCAATCACGCATGCGTGTGTCAAACCGAGGCCACATGGGTGCATGGGCAGAGCCACCCAAGGTGTGGTCAGAGTGAGAGAAAG
ENSMUSG00000020431	Adcy1	8791	25	116	100	GCATGCGTGTGTCAAACCGAGGCCACATGGGTGCATGGGCAGAGCCACCCAAGGTGTGGTCAGAGTGAGAGAAAGCAACCTTTAGGATGACACTGCCTTC
ENSMUSG00000020431	Adcy1	8791	25	117	100	CATGGGTGCATGGGCAGAGCCACCCAAGGTGTGGTCAGAGTGAGAGAAAGCAACCTTTAGGATGACACTGCCTTCTCTGGGCACAGGACTGTTCTGAAGC
ENSMUSG00000020431	Adcy1	8791	25	118	100	AAGGTGTGGTCAGAGTGAGAGAAAGCAACCTTTAGGATGACACTGCCTTCTCTGGGCACAGGACTGTTCTGAAGCAGACCACACAGGAGCCTTGGCTGGG
ENSMUSG00000020431	Adcy1	8791	25	119	100	CAACCTTTAGGATGACACTGCCTTCTCTGGGCACAGGACTGTTCTGAAGCAGACCACACAGGAGCCTTGGCTGGGTCTCTTCTTCAGGGGCGACATCTCC
ENSMUSG00000020431	Adcy1	8791	25	120	100	TCTGGGCACAGGACTGTTCTGAAGCAGACCACACAGGAGCCTTGGCTGGGTCTCTTCTTCAGGGGCGACATCTCCATCATCAGCAATTCCAAACCCGCCT
ENSMUSG00000020431	Adcy1	8791	25	121	100	AGACCACACAGGAGCCTTGGCTGGGTCTCTTCTTCAGGGGCGACATCTCCATCATCAGCAATTCCAAACCCGCCTACTTCCTGTGAGGTCAGGAACCACA
ENSMUSG00000020431	Adcy1	8791	25	122	100	TCTCTTCTTCAGGGGCGACATCTCCATCATCAGCAATTCCAAACCCGCCTACTTCCTGTGAGGTCAGGAACCACACGTGCAGCCATAATGTACCTTGGGG
ENSMUSG00000020431	Adcy1	8791	25	123	100	ATCATCAGCAATTCCAAACCCGCCTACTTCCTGTGAGGTCAGGAACCACACGTGCAGCCATAATGTACCTTGGGGTTTGGTGATAAACAACCTTCTTTTT
ENSMUSG00000020431	Adcy1	8791	25	124	100	ACTTCCTGTGAGGTCAGGAACCACACGTGCAGCCATAATGTACCTTGGGGTTTGGTGATAAACAACCTTCTTTTTACTTGTGATAAAAATGTATTATATT
ENSMUSG00000020431	Adcy1	8791	25	125	100	CGTGCAGCCATAATGTACCTTGGGGTTTGGTGATAAACAACCTTCTTTTTACTTGTGATAAAAATGTATTATATTGCCTTATTTATTTTTAATCTTGTAC
ENSMUSG00000020431	Adcy1	8791	25	126	100	TTTGGTGATAAACAACCTTCTTTTTACTTGTGATAAAAATGTATTATATTGCCTTATTTATTTTTAATCTTGTACAATATTCATGTACAAATGTTAGAGC
ENSMUSG00000020431	Adcy1	8791	25	127	100	ACTTGTGATAAAAATGTATTATATTGCCTTATTTATTTTTAATCTTGTACAATATTCATGTACAAATGTTAGAGCCATTTAGGTAGGATTCTCTCCAAAT
ENSMUSG00000020431	Adcy1	8791	25	128	100	GCCTTATTTATTTTTAATCTTGTACAATATTCATGTACAAATGTTAGAGCCATTTAGGTAGGATTCTCTCCAAATTATTTATTTTAAGATGCTCTGTAAA
ENSMUSG00000020431	Adcy1	8791	25	129	100	AATATTCATGTACAAATGTTAGAGCCATTTAGGTAGGATTCTCTCCAAATTATTTATTTTAAGATGCTCTGTAAATAGTGCACCAGTTACAGGTGCTTGA
ENSMUSG00000020431	Adcy1	8791	25	130	100	CATTTAGGTAGGATTCTCTCCAAATTATTTATTTTAAGATGCTCTGTAAATAGTGCACCAGTTACAGGTGCTTGATCACTTGTACCAAAAATGAGGAAAA
ENSMUSG00000020431	Adcy1	8791	25	131	100	TATTTATTTTAAGATGCTCTGTAAATAGTGCACCAGTTACAGGTGCTTGATCACTTGTACCAAAAATGAGGAAAAGCCTGGTACCCACTTCAGCCCCTCT
ENSMUSG00000020431	Adcy1	8791	25	132	100	TAGTGCACCAGTTACAGGTGCTTGATCACTTGTACCAAAAATGAGGAAAAGCCTGGTACCCACTTCAGCCCCTCTTGTAATGCCGTGGCCCTTGGGAAAT
ENSMUSG00000020431	Adcy1	8791	25	133	100	TCACTTGTACCAAAAATGAGGAAAAGCCTGGTACCCACTTCAGCCCCTCTTGTAATGCCGTGGCCCTTGGGAAATGACCCTGTTGTGTTCCCTTCCCGCC
ENSMUSG00000020431	Adcy1	8791	25	134	100	GCCTGGTACCCACTTCAGCCCCTCTTGTAATGCCGTGGCCCTTGGGAAATGACCCTGTTGTGTTCCCTTCCCGCCCCTAGCATGCCTCCCGTGCCTGACA
ENSMUSG00000020431	Adcy1	8791	25	135	100	TGTAATGCCGTGGCCCTTGGGAAATGACCCTGTTGTGTTCCCTTCCCGCCCCTAGCATGCCTCCCGTGCCTGACACCATAGAATAGAACACAGCCCCAGA
ENSMUSG00000020431	Adcy1	8791	25	136	100	GACCCTGTTGTGTTCCCTTCCCGCCCCTAGCATGCCTCCCGTGCCTGACACCATAGAATAGAACACAGCCCCAGAATGCTTCCAAATGCTTCCATGGGCT
ENSMUSG00000020431	Adcy1	8791	25	137	100	CCTAGCATGCCTCCCGTGCCTGACACCATAGAATAGAACACAGCCCCAGAATGCTTCCAAATGCTTCCATGGGCTGTGCCATCCTGGGACAGTCCACTCC
ENSMUSG00000020431	Adcy1	8791	25	138	100	CCATAGAATAGAACACAGCCCCAGAATGCTTCCAAATGCTTCCATGGGCTGTGCCATCCTGGGACAGTCCACTCCTGGGGTGTCCATACCTACAGGTGTA
ENSMUSG00000020431	Adcy1	8791	25	139	100	ATGCTTCCAAATGCTTCCATGGGCTGTGCCATCCTGGGACAGTCCACTCCTGGGGTGTCCATACCTACAGGTGTATGTCCCCCCCACACACAGCAATCCA
ENSMUSG00000020431	Adcy1	8791	25	140	100	GTGCCATCCTGGGACAGTCCACTCCTGGGGTGTCCATACCTACAGGTGTATGTCCCCCCCACACACAGCAATCCAGTTGTTTCTCAGACTCCAAAGCCAC
ENSMUSG00000020431	Adcy1	8791	25	141	100	TGGGGTGTCCATACCTACAGGTGTATGTCCCCCCCACACACAGCAATCCAGTTGTTTCTCAGACTCCAAAGCCACCAGGGCTTCCGGACCCCTTCTGTCA
ENSMUSG00000020431	Adcy1	8791	25	142	100	TGTCCCCCCCACACACAGCAATCCAGTTGTTTCTCAGACTCCAAAGCCACCAGGGCTTCCGGACCCCTTCTGTCATAGAAGCAATAACCATAACCTAATA
ENSMUSG00000020431	Adcy1	8791	25	143	100	GTTGTTTCTCAGACTCCAAAGCCACCAGGGCTTCCGGACCCCTTCTGTCATAGAAGCAATAACCATAACCTAATACTGTAGAGACAAGTCTGGCCCAAGC
ENSMUSG00000020431	Adcy1	8791	25	144	100	CAGGGCTTCCGGACCCCTTCTGTCATAGAAGCAATAACCATAACCTAATACTGTAGAGACAAGTCTGGCCCAAGCAGATTGCTATTCCAGAAACTACCTG
ENSMUSG00000020431	Adcy1	8791	25	145	100	TAGAAGCAATAACCATAACCTAATACTGTAGAGACAAGTCTGGCCCAAGCAGATTGCTATTCCAGAAACTACCTGTGCATGTGAGATTGCTATAAAGGAC
ENSMUSG00000020431	Adcy1	8791	25	146	100	CTGTAGAGACAAGTCTGGCCCAAGCAGATTGCTATTCCAGAAACTACCTGTGCATGTGAGATTGCTATAAAGGACTGACATCCAAGTCCCCCATCCCTCC
ENSMUSG00000020431	Adcy1	8791	25	147	100	AGATTGCTATTCCAGAAACTACCTGTGCATGTGAGATTGCTATAAAGGACTGACATCCAAGTCCCCCATCCCTCCCAGAAGGCCTAGCTCTAGCTTCTTG
ENSMUSG00000020431	Adcy1	8791	25	148	100	TGCATGTGAGATTGCTATAAAGGACTGACATCCAAGTCCCCCATCCCTCCCAGAAGGCCTAGCTCTAGCTTCTTGGTTCCTACAGCCAGGATTGGTACAC
ENSMUSG00000020431	Adcy1	8791	25	149	100	TGACATCCAAGTCCCCCATCCCTCCCAGAAGGCCTAGCTCTAGCTTCTTGGTTCCTACAGCCAGGATTGGTACACACACACCCCGCCCTCCAAGATATAG
ENSMUSG00000020431	Adcy1	8791	25	150	100	CAGAAGGCCTAGCTCTAGCTTCTTGGTTCCTACAGCCAGGATTGGTACACACACACCCCGCCCTCCAAGATATAGCTGAGCGGACTGAGCCAGCCACCAG
ENSMUSG00000020431	Adcy1	8791	25	151	100	GTTCCTACAGCCAGGATTGGTACACACACACCCCGCCCTCCAAGATATAGCTGAGCGGACTGAGCCAGCCACCAGTCCTGGGCCCCACTATTGTCACTAA
ENSMUSG00000020431	Adcy1	8791	25	152	100	ACACACCCCGCCCTCCAAGATATAGCTGAGCGGACTGAGCCAGCCACCAGTCCTGGGCCCCACTATTGTCACTAAGGAATAAAGGTGAGGGCAGCCTTCC
ENSMUSG00000020431	Adcy1	8791	25	153	100	CTGAGCGGACTGAGCCAGCCACCAGTCCTGGGCCCCACTATTGTCACTAAGGAATAAAGGTGAGGGCAGCCTTCCGATCCTTATATCTATACCTATCCTT
ENSMUSG00000020431	Adcy1	8791	25	154	100	TCCTGGGCCCCACTATTGTCACTAAGGAATAAAGGTGAGGGCAGCCTTCCGATCCTTATATCTATACCTATCCTTGAATCGTGATGTTTTATGTGACTGA
ENSMUSG00000020431	Adcy1	8791	25	155	100	GGAATAAAGGTGAGGGCAGCCTTCCGATCCTTATATCTATACCTATCCTTGAATCGTGATGTTTTATGTGACTGAGGGTCGTGATGGTTTGTTTCAGTGT
ENSMUSG00000020431	Adcy1	8791	25	156	100	GATCCTTATATCTATACCTATCCTTGAATCGTGATGTTTTATGTGACTGAGGGTCGTGATGGTTTGTTTCAGTGTTGCAACATTGAAAGGTACTTGTGGC
ENSMUSG00000020431	Adcy1	8791	25	157	100	GAATCGTGATGTTTTATGTGACTGAGGGTCGTGATGGTTTGTTTCAGTGTTGCAACATTGAAAGGTACTTGTGGCATATTCCAGGTGGCACATCTGGTGG
ENSMUSG00000020431	Adcy1	8791	25	158	100	GGGTCGTGATGGTTTGTTTCAGTGTTGCAACATTGAAAGGTACTTGTGGCATATTCCAGGTGGCACATCTGGTGGGAAAAGGGCACCCCCGAGGGTATAT
ENSMUSG00000020431	Adcy1	8791	25	159	100	TGCAACATTGAAAGGTACTTGTGGCATATTCCAGGTGGCACATCTGGTGGGAAAAGGGCACCCCCGAGGGTATATCAGGAAAGAGCTAGAAAGGGCTGAC
ENSMUSG00000020431	Adcy1	8791	25	160	100	ATATTCCAGGTGGCACATCTGGTGGGAAAAGGGCACCCCCGAGGGTATATCAGGAAAGAGCTAGAAAGGGCTGACTGAGGATTCAGGCTGTGGGCTTGGC
ENSMUSG00000020431	Adcy1	8791	25	161	100	GAAAAGGGCACCCCCGAGGGTATATCAGGAAAGAGCTAGAAAGGGCTGACTGAGGATTCAGGCTGTGGGCTTGGCTGGCAGATATGAGCGGCTTCCAGAG
ENSMUSG00000020431	Adcy1	8791	25	162	100	CAGGAAAGAGCTAGAAAGGGCTGACTGAGGATTCAGGCTGTGGGCTTGGCTGGCAGATATGAGCGGCTTCCAGAGAGCTCACATTGTATTTACACGTGAG
ENSMUSG00000020431	Adcy1	8791	25	163	100	TGAGGATTCAGGCTGTGGGCTTGGCTGGCAGATATGAGCGGCTTCCAGAGAGCTCACATTGTATTTACACGTGAGCTGAAGGACTCTTGTACCACTGTGC
ENSMUSG00000020431	Adcy1	8791	25	164	100	TGGCAGATATGAGCGGCTTCCAGAGAGCTCACATTGTATTTACACGTGAGCTGAAGGACTCTTGTACCACTGTGCTAACAGCAACCCGCTGAGACTGTGC
ENSMUSG00000020431	Adcy1	8791	25	165	100	AGCTCACATTGTATTTACACGTGAGCTGAAGGACTCTTGTACCACTGTGCTAACAGCAACCCGCTGAGACTGTGCAAATGACTTGCTTTAACGGGGTGAG
ENSMUSG00000020431	Adcy1	8791	25	166	100	CTGAAGGACTCTTGTACCACTGTGCTAACAGCAACCCGCTGAGACTGTGCAAATGACTTGCTTTAACGGGGTGAGTAAGAGGGAAACAGTTTGGACTGTG
ENSMUSG00000020431	Adcy1	8791	25	167	100	TAACAGCAACCCGCTGAGACTGTGCAAATGACTTGCTTTAACGGGGTGAGTAAGAGGGAAACAGTTTGGACTGTGGAATAGGGGAAGAGTTCACTCAAGT
ENSMUSG00000020431	Adcy1	8791	25	168	100	AAATGACTTGCTTTAACGGGGTGAGTAAGAGGGAAACAGTTTGGACTGTGGAATAGGGGAAGAGTTCACTCAAGTCTCCCAGCCACCCTCAGCAGGTAAG
ENSMUSG00000020431	Adcy1	8791	25	169	100	TAAGAGGGAAACAGTTTGGACTGTGGAATAGGGGAAGAGTTCACTCAAGTCTCCCAGCCACCCTCAGCAGGTAAGTTCTAGGACTCTCCAAGTCCCAGGG
ENSMUSG00000020431	Adcy1	8791	25	170	100	GAATAGGGGAAGAGTTCACTCAAGTCTCCCAGCCACCCTCAGCAGGTAAGTTCTAGGACTCTCCAAGTCCCAGGGATCTTTTACAGCCTGTGCAGAACTT
ENSMUSG00000020431	Adcy1	8791	25	171	100	CTCCCAGCCACCCTCAGCAGGTAAGTTCTAGGACTCTCCAAGTCCCAGGGATCTTTTACAGCCTGTGCAGAACTTCTGTCAGTGGACGTTTGGAGGCATG
ENSMUSG00000020431	Adcy1	8791	25	172	100	TTCTAGGACTCTCCAAGTCCCAGGGATCTTTTACAGCCTGTGCAGAACTTCTGTCAGTGGACGTTTGGAGGCATGGTTGTATAGAGCAAGCATCTACCCT
ENSMUSG00000020431	Adcy1	8791	25	173	100	ATCTTTTACAGCCTGTGCAGAACTTCTGTCAGTGGACGTTTGGAGGCATGGTTGTATAGAGCAAGCATCTACCCTTCACGTAATAGTGGCAGGGAAAGAA
ENSMUSG00000020431	Adcy1	8791	25	174	100	CTGTCAGTGGACGTTTGGAGGCATGGTTGTATAGAGCAAGCATCTACCCTTCACGTAATAGTGGCAGGGAAAGAACACTGCTACATACACTGCACACCCG
ENSMUSG00000020431	Adcy1	8791	25	175	100	GTTGTATAGAGCAAGCATCTACCCTTCACGTAATAGTGGCAGGGAAAGAACACTGCTACATACACTGCACACCCGTCAGCACCATGCTGCAGAAGGGATG
ENSMUSG00000020431	Adcy1	8791	25	176	100	TCACGTAATAGTGGCAGGGAAAGAACACTGCTACATACACTGCACACCCGTCAGCACCATGCTGCAGAAGGGATGCTGATATTTTACATTCTTACATGGC
ENSMUSG00000020431	Adcy1	8791	25	177	100	CACTGCTACATACACTGCACACCCGTCAGCACCATGCTGCAGAAGGGATGCTGATATTTTACATTCTTACATGGCTGTACATATGTAGCCACCAGAAACT
ENSMUSG00000020431	Adcy1	8791	25	178	100	TCAGCACCATGCTGCAGAAGGGATGCTGATATTTTACATTCTTACATGGCTGTACATATGTAGCCACCAGAAACTGACTTGCTCGTGCTTTTTAATGGCT
ENSMUSG00000020431	Adcy1	8791	25	179	100	CTGATATTTTACATTCTTACATGGCTGTACATATGTAGCCACCAGAAACTGACTTGCTCGTGCTTTTTAATGGCTTCAACTTGCAAAGGGTGTGCTTGGC
ENSMUSG00000020431	Adcy1	8791	25	180	100	TGTACATATGTAGCCACCAGAAACTGACTTGCTCGTGCTTTTTAATGGCTTCAACTTGCAAAGGGTGTGCTTGGCTTGATAAAATTAATAAAGAGCAAGG
ENSMUSG00000020431	Adcy1	8791	25	181	100	GACTTGCTCGTGCTTTTTAATGGCTTCAACTTGCAAAGGGTGTGCTTGGCTTGATAAAATTAATAAAGAGCAAGGATGGCAGCTTGGATATTATGTGGGT
ENSMUSG00000020431	Adcy1	8791	25	182	100	TCAACTTGCAAAGGGTGTGCTTGGCTTGATAAAATTAATAAAGAGCAAGGATGGCAGCTTGGATATTATGTGGGTCTTTGAAGCATCTTGCTTCTCTAGC
ENSMUSG00000020431	Adcy1	8791	25	183	100	TTGATAAAATTAATAAAGAGCAAGGATGGCAGCTTGGATATTATGTGGGTCTTTGAAGCATCTTGCTTCTCTAGCTGTGATTGGCTTTGAATGTTTCTAT
ENSMUSG00000020431	Adcy1	8791	25	184	100	ATGGCAGCTTGGATATTATGTGGGTCTTTGAAGCATCTTGCTTCTCTAGCTGTGATTGGCTTTGAATGTTTCTATAGCAGGCTTGAACCAATAGCTCATT
ENSMUSG00000020431	Adcy1	8791	25	185	100	CTTTGAAGCATCTTGCTTCTCTAGCTGTGATTGGCTTTGAATGTTTCTATAGCAGGCTTGAACCAATAGCTCATTTCTATTTACAACTATAGGCTTGGCA
ENSMUSG00000020431	Adcy1	8791	25	186	100	TGTGATTGGCTTTGAATGTTTCTATAGCAGGCTTGAACCAATAGCTCATTTCTATTTACAACTATAGGCTTGGCAGGAGGTTGATGGTTAAAAGTGTGTA
ENSMUSG00000020431	Adcy1	8791	25	187	100	AGCAGGCTTGAACCAATAGCTCATTTCTATTTACAACTATAGGCTTGGCAGGAGGTTGATGGTTAAAAGTGTGTATGCATATGCACTTGCACACATACAC
ENSMUSG00000020431	Adcy1	8791	25	188	100	TCTATTTACAACTATAGGCTTGGCAGGAGGTTGATGGTTAAAAGTGTGTATGCATATGCACTTGCACACATACACATGTACACACACACAATTTTCATAG
ENSMUSG00000020431	Adcy1	8791	25	189	100	GGAGGTTGATGGTTAAAAGTGTGTATGCATATGCACTTGCACACATACACATGTACACACACACAATTTTCATAGGGAATATGAGAGTTGGTTTGTAATC
ENSMUSG00000020431	Adcy1	8791	25	190	100	TGCATATGCACTTGCACACATACACATGTACACACACACAATTTTCATAGGGAATATGAGAGTTGGTTTGTAATCCTGACCCCTTAGGCTGGGGGTTAGA
ENSMUSG00000020431	Adcy1	8791	25	191	100	ATGTACACACACACAATTTTCATAGGGAATATGAGAGTTGGTTTGTAATCCTGACCCCTTAGGCTGGGGGTTAGAGGAGCTGCTTGGAGATGTCCTTGGA
ENSMUSG00000020431	Adcy1	8791	25	192	100	GGAATATGAGAGTTGGTTTGTAATCCTGACCCCTTAGGCTGGGGGTTAGAGGAGCTGCTTGGAGATGTCCTTGGACTCAGAGTTCAGAAGGCAAAATTGA
ENSMUSG00000020431	Adcy1	8791	25	193	100	CTGACCCCTTAGGCTGGGGGTTAGAGGAGCTGCTTGGAGATGTCCTTGGACTCAGAGTTCAGAAGGCAAAATTGAGCCTCCCTCAGCTGGCCTGGGGAAA
ENSMUSG00000020431	Adcy1	8791	25	194	100	GGAGCTGCTTGGAGATGTCCTTGGACTCAGAGTTCAGAAGGCAAAATTGAGCCTCCCTCAGCTGGCCTGGGGAAAGAACCTCTCAGGCGAAAGAGGTCTC
ENSMUSG00000020431	Adcy1	8791	25	195	100	CTCAGAGTTCAGAAGGCAAAATTGAGCCTCCCTCAGCTGGCCTGGGGAAAGAACCTCTCAGGCGAAAGAGGTCTCAATCCAGGAACTGAGGCACCTAGAT
ENSMUSG00000020431	Adcy1	8791	25	196	100	GCCTCCCTCAGCTGGCCTGGGGAAAGAACCTCTCAGGCGAAAGAGGTCTCAATCCAGGAACTGAGGCACCTAGATAACTATCTTATACATAAATCATTCC
ENSMUSG00000020431	Adcy1	8791	25	197	100	GAACCTCTCAGGCGAAAGAGGTCTCAATCCAGGAACTGAGGCACCTAGATAACTATCTTATACATAAATCATTCCGAGCTCTTTGACACCAGAGAGAAAA
ENSMUSG00000020431	Adcy1	8791	25	198	100	AATCCAGGAACTGAGGCACCTAGATAACTATCTTATACATAAATCATTCCGAGCTCTTTGACACCAGAGAGAAAACGTGTTGATATGTTCACAGCAGACA
ENSMUSG00000020431	Adcy1	8791	25	199	100	AACTATCTTATACATAAATCATTCCGAGCTCTTTGACACCAGAGAGAAAACGTGTTGATATGTTCACAGCAGACACGATGAATGTGGTTGAAATGGATGC
ENSMUSG00000020431	Adcy1	8791	25	200	100	GAGCTCTTTGACACCAGAGAGAAAACGTGTTGATATGTTCACAGCAGACACGATGAATGTGGTTGAAATGGATGCTGTTTGACCCAAAGCAACTCCTGTA
ENSMUSG00000020431	Adcy1	8791	25	201	100	CGTGTTGATATGTTCACAGCAGACACGATGAATGTGGTTGAAATGGATGCTGTTTGACCCAAAGCAACTCCTGTACCTACATAGTCAACCAGTGCCACAT
ENSMUSG00000020431	Adcy1	8791	25	202	100	CGATGAATGTGGTTGAAATGGATGCTGTTTGACCCAAAGCAACTCCTGTACCTACATAGTCAACCAGTGCCACATGGACCAAGACCAATGTGGATCCAGA
ENSMUSG00000020431	Adcy1	8791	25	203	100	TGTTTGACCCAAAGCAACTCCTGTACCTACATAGTCAACCAGTGCCACATGGACCAAGACCAATGTGGATCCAGAGGCACAGACCTAGAGCCAGGAGCCT
ENSMUSG00000020431	Adcy1	8791	25	204	100	CCTACATAGTCAACCAGTGCCACATGGACCAAGACCAATGTGGATCCAGAGGCACAGACCTAGAGCCAGGAGCCTTCCTAGGGGACGGCAGAAGGTGTGT
ENSMUSG00000020431	Adcy1	8791	25	205	100	GGACCAAGACCAATGTGGATCCAGAGGCACAGACCTAGAGCCAGGAGCCTTCCTAGGGGACGGCAGAAGGTGTGTGGCCTGGCCAGAGGATTCACTCCTG
ENSMUSG00000020431	Adcy1	8791	25	206	100	GGCACAGACCTAGAGCCAGGAGCCTTCCTAGGGGACGGCAGAAGGTGTGTGGCCTGGCCAGAGGATTCACTCCTGAAGTGTAGGGTGGGCACAGTACGGA
ENSMUSG00000020431	Adcy1	8791	25	207	100	TCCTAGGGGACGGCAGAAGGTGTGTGGCCTGGCCAGAGGATTCACTCCTGAAGTGTAGGGTGGGCACAGTACGGAAGGGCAAGGGCATATTCAGGAAGGC
ENSMUSG00000020431	Adcy1	8791	25	208	100	GGCCTGGCCAGAGGATTCACTCCTGAAGTGTAGGGTGGGCACAGTACGGAAGGGCAAGGGCATATTCAGGAAGGCTCCTGCTGCTCACTGGTAGGAGAAT
ENSMUSG00000020431	Adcy1	8791	25	209	100	AAGTGTAGGGTGGGCACAGTACGGAAGGGCAAGGGCATATTCAGGAAGGCTCCTGCTGCTCACTGGTAGGAGAATTCTGGAGAGTGTCATCTCACATATA
ENSMUSG00000020431	Adcy1	8791	25	210	100	AGGGCAAGGGCATATTCAGGAAGGCTCCTGCTGCTCACTGGTAGGAGAATTCTGGAGAGTGTCATCTCACATATAGAGTTGGATGACCTGGGGTGGCCTG
ENSMUSG00000020431	Adcy1	8791	25	211	100	TCCTGCTGCTCACTGGTAGGAGAATTCTGGAGAGTGTCATCTCACATATAGAGTTGGATGACCTGGGGTGGCCTGGTCCTGATGCTGGCTGATGACTGCT
ENSMUSG00000020431	Adcy1	8791	25	212	100	TCTGGAGAGTGTCATCTCACATATAGAGTTGGATGACCTGGGGTGGCCTGGTCCTGATGCTGGCTGATGACTGCTGCACGAGGGGTTCTTCCTAGCTAGA
ENSMUSG00000020431	Adcy1	8791	25	213	100	GAGTTGGATGACCTGGGGTGGCCTGGTCCTGATGCTGGCTGATGACTGCTGCACGAGGGGTTCTTCCTAGCTAGAGGCCATCTGTGATGCTCTGTGGGCT
ENSMUSG00000020431	Adcy1	8791	25	214	100	GTCCTGATGCTGGCTGATGACTGCTGCACGAGGGGTTCTTCCTAGCTAGAGGCCATCTGTGATGCTCTGTGGGCTGGAGGCAAGGAGGATGTGGTAGGTT
ENSMUSG00000020431	Adcy1	8791	25	215	100	GCACGAGGGGTTCTTCCTAGCTAGAGGCCATCTGTGATGCTCTGTGGGCTGGAGGCAAGGAGGATGTGGTAGGTTCTAGTGGCTGTTACACAAGGTCTGG
ENSMUSG00000020431	Adcy1	8791	25	216	100	GGCCATCTGTGATGCTCTGTGGGCTGGAGGCAAGGAGGATGTGGTAGGTTCTAGTGGCTGTTACACAAGGTCTGGCACACCGTGAGCACAACTTCACACA
ENSMUSG00000020431	Adcy1	8791	25	217	100	GGAGGCAAGGAGGATGTGGTAGGTTCTAGTGGCTGTTACACAAGGTCTGGCACACCGTGAGCACAACTTCACACAGACACACTGAGTCATGCAAGGCAGG
ENSMUSG00000020431	Adcy1	8791	25	218	100	CTAGTGGCTGTTACACAAGGTCTGGCACACCGTGAGCACAACTTCACACAGACACACTGAGTCATGCAAGGCAGGTGTCGACACCCTGCAGAGTCTGCCT
ENSMUSG00000020431	Adcy1	8791	25	219	100	CACACCGTGAGCACAACTTCACACAGACACACTGAGTCATGCAAGGCAGGTGTCGACACCCTGCAGAGTCTGCCTCACCTCCAAGAATTCAGAGGGCACT
ENSMUSG00000020431	Adcy1	8791	25	220	100	GACACACTGAGTCATGCAAGGCAGGTGTCGACACCCTGCAGAGTCTGCCTCACCTCCAAGAATTCAGAGGGCACTTTTGGATGGATATGGGAACCCTTGT
ENSMUSG00000020431	Adcy1	8791	25	221	100	TGTCGACACCCTGCAGAGTCTGCCTCACCTCCAAGAATTCAGAGGGCACTTTTGGATGGATATGGGAACCCTTGTTTATTCCTTGTGAGCACAGGTCCAA
ENSMUSG00000020431	Adcy1	8791	25	222	100	CACCTCCAAGAATTCAGAGGGCACTTTTGGATGGATATGGGAACCCTTGTTTATTCCTTGTGAGCACAGGTCCAATAATAGGAGATGAGATCTGTCACTC
ENSMUSG00000020431	Adcy1	8791	25	223	100	TTTGGATGGATATGGGAACCCTTGTTTATTCCTTGTGAGCACAGGTCCAATAATAGGAGATGAGATCTGTCACTCTGTGGTTCATTCCATAAATGCTTCA
ENSMUSG00000020431	Adcy1	8791	25	224	100	TTATTCCTTGTGAGCACAGGTCCAATAATAGGAGATGAGATCTGTCACTCTGTGGTTCATTCCATAAATGCTTCAGATCCAACTTCAAGTGCCACATTCT
ENSMUSG00000020431	Adcy1	8791	25	225	100	TAATAGGAGATGAGATCTGTCACTCTGTGGTTCATTCCATAAATGCTTCAGATCCAACTTCAAGTGCCACATTCTGTCACTAAACAATTATCCAATCAAC
ENSMUSG00000020431	Adcy1	8791	25	226	100	TGTGGTTCATTCCATAAATGCTTCAGATCCAACTTCAAGTGCCACATTCTGTCACTAAACAATTATCCAATCAACACATCATTATCTAATGACTAAGACA
ENSMUSG00000020431	Adcy1	8791	25	227	100	GATCCAACTTCAAGTGCCACATTCTGTCACTAAACAATTATCCAATCAACACATCATTATCTAATGACTAAGACATTTGGGTTTTTAAGGTTTCTGACCA
ENSMUSG00000020431	Adcy1	8791	25	228	100	GTCACTAAACAATTATCCAATCAACACATCATTATCTAATGACTAAGACATTTGGGTTTTTAAGGTTTCTGACCAGTTTAATCCATTCTGTTCCACACAT
ENSMUSG00000020431	Adcy1	8791	25	229	100	ACATCATTATCTAATGACTAAGACATTTGGGTTTTTAAGGTTTCTGACCAGTTTAATCCATTCTGTTCCACACATACCAGATCTGTTCAGTAGCTTATAA
ENSMUSG00000020431	Adcy1	8791	25	230	100	TTTGGGTTTTTAAGGTTTCTGACCAGTTTAATCCATTCTGTTCCACACATACCAGATCTGTTCAGTAGCTTATAAAACAAAAATTACTCCACTAGAGGCT
ENSMUSG00000020431	Adcy1	8791	25	231	100	GTTTAATCCATTCTGTTCCACACATACCAGATCTGTTCAGTAGCTTATAAAACAAAAATTACTCCACTAGAGGCTGTGCTTAATTCAAATCAATGTGTGT
ENSMUSG00000020431	Adcy1	8791	25	232	100	ACCAGATCTGTTCAGTAGCTTATAAAACAAAAATTACTCCACTAGAGGCTGTGCTTAATTCAAATCAATGTGTGTTCCTGCGCATGTGTGTGTGCATGTG
ENSMUSG00000020431	Adcy1	8791	25	233	100	AACAAAAATTACTCCACTAGAGGCTGTGCTTAATTCAAATCAATGTGTGTTCCTGCGCATGTGTGTGTGCATGTGGGTAGACATGTGCATGCATGTCTAA
ENSMUSG00000020431	Adcy1	8791	25	234	100	GTGCTTAATTCAAATCAATGTGTGTTCCTGCGCATGTGTGTGTGCATGTGGGTAGACATGTGCATGCATGTCTAATAAGACATAAAATTATTCTCCCTGG
ENSMUSG00000020431	Adcy1	8791	25	235	100	TCCTGCGCATGTGTGTGTGCATGTGGGTAGACATGTGCATGCATGTCTAATAAGACATAAAATTATTCTCCCTGGGGTTAAGATTACTCACTGAAGAAAA
ENSMUSG00000020431	Adcy1	8791	25	236	100	GGTAGACATGTGCATGCATGTCTAATAAGACATAAAATTATTCTCCCTGGGGTTAAGATTACTCACTGAAGAAAAATAAATACATTTGAATATAGTGAGC
ENSMUSG00000020431	Adcy1	8791	25	237	100	TAAGACATAAAATTATTCTCCCTGGGGTTAAGATTACTCACTGAAGAAAAATAAATACATTTGAATATAGTGAGCTGTCACTTGGGACACTTGATATCCT
ENSMUSG00000020431	Adcy1	8791	25	238	100	GGTTAAGATTACTCACTGAAGAAAAATAAATACATTTGAATATAGTGAGCTGTCACTTGGGACACTTGATATCCTATAAGCTGAGGCAGCACACACCATC
ENSMUSG00000020431	Adcy1	8791	25	239	100	ATAAATACATTTGAATATAGTGAGCTGTCACTTGGGACACTTGATATCCTATAAGCTGAGGCAGCACACACCATCCCCTTCCCTCGCTCCAGGGAGGGAG
ENSMUSG00000020431	Adcy1	8791	25	240	100	TGTCACTTGGGACACTTGATATCCTATAAGCTGAGGCAGCACACACCATCCCCTTCCCTCGCTCCAGGGAGGGAGGGGGATGGGCACATCCCTGAGCCAC
ENSMUSG00000020431	Adcy1	8791	25	241	100	ATAAGCTGAGGCAGCACACACCATCCCCTTCCCTCGCTCCAGGGAGGGAGGGGGATGGGCACATCCCTGAGCCACTCAGCCTACTACTAAGTCTCTTTTG
ENSMUSG00000020431	Adcy1	8791	25	242	100	CCCTTCCCTCGCTCCAGGGAGGGAGGGGGATGGGCACATCCCTGAGCCACTCAGCCTACTACTAAGTCTCTTTTGCAAAAAGACCGATATAATAGCATCA
ENSMUSG00000020431	Adcy1	8791	25	243	100	GGGGATGGGCACATCCCTGAGCCACTCAGCCTACTACTAAGTCTCTTTTGCAAAAAGACCGATATAATAGCATCATTCTGGTCTGGGTGCATAAAGAGAC
ENSMUSG00000020431	Adcy1	8791	25	244	100	TCAGCCTACTACTAAGTCTCTTTTGCAAAAAGACCGATATAATAGCATCATTCTGGTCTGGGTGCATAAAGAGACCCTGTTGCTCCTGTCTCTCTTGTCT
ENSMUSG00000020431	Adcy1	8791	25	245	100	CAAAAAGACCGATATAATAGCATCATTCTGGTCTGGGTGCATAAAGAGACCCTGTTGCTCCTGTCTCTCTTGTCTTGTTGGACTGAGAGTTTGGGTGTAT
ENSMUSG00000020431	Adcy1	8791	25	246	100	TTCTGGTCTGGGTGCATAAAGAGACCCTGTTGCTCCTGTCTCTCTTGTCTTGTTGGACTGAGAGTTTGGGTGTATGTTGACTATTGTGCAGAGTAGGTGG
ENSMUSG00000020431	Adcy1	8791	25	247	100	CCTGTTGCTCCTGTCTCTCTTGTCTTGTTGGACTGAGAGTTTGGGTGTATGTTGACTATTGTGCAGAGTAGGTGGTAACTCCACATGCCGGGTGGGTGTC
ENSMUSG00000020431	Adcy1	8791	25	248	100	TGTTGGACTGAGAGTTTGGGTGTATGTTGACTATTGTGCAGAGTAGGTGGTAACTCCACATGCCGGGTGGGTGTCCATCCAAACTCTGAGGAGGGAACAA
ENSMUSG00000020431	Adcy1	8791	25	249	100	GTTGACTATTGTGCAGAGTAGGTGGTAACTCCACATGCCGGGTGGGTGTCCATCCAAACTCTGAGGAGGGAACAAAATGACATCAACCTCAGGTACATGA
ENSMUSG00000020431	Adcy1	8791	25	250	100	TAACTCCACATGCCGGGTGGGTGTCCATCCAAACTCTGAGGAGGGAACAAAATGACATCAACCTCAGGTACATGAGCCCTTCCCTGCCCTCCATGTTCTA
ENSMUSG00000020431	Adcy1	8791	25	251	100	CATCCAAACTCTGAGGAGGGAACAAAATGACATCAACCTCAGGTACATGAGCCCTTCCCTGCCCTCCATGTTCTAGGAGCTGACGTGGAGGCCACACCTT
ENSMUSG00000020431	Adcy1	8791	25	252	100	AATGACATCAACCTCAGGTACATGAGCCCTTCCCTGCCCTCCATGTTCTAGGAGCTGACGTGGAGGCCACACCTTTCATCTGGCGTGTCAGCTGTTGCCT
ENSMUSG00000020431	Adcy1	8791	25	253	100	GCCCTTCCCTGCCCTCCATGTTCTAGGAGCTGACGTGGAGGCCACACCTTTCATCTGGCGTGTCAGCTGTTGCCTGTCTGGGTTATCCAGTGGGAAGAAC
ENSMUSG00000020431	Adcy1	8791	25	254	100	GGAGCTGACGTGGAGGCCACACCTTTCATCTGGCGTGTCAGCTGTTGCCTGTCTGGGTTATCCAGTGGGAAGAACAAGGCTCAGGAGGCTATCTTGGGTT
ENSMUSG00000020431	Adcy1	8791	25	255	100	TCATCTGGCGTGTCAGCTGTTGCCTGTCTGGGTTATCCAGTGGGAAGAACAAGGCTCAGGAGGCTATCTTGGGTTGTGTTTCCTAAGTAGCTGGAAAAAG
ENSMUSG00000020431	Adcy1	8791	25	256	100	GTCTGGGTTATCCAGTGGGAAGAACAAGGCTCAGGAGGCTATCTTGGGTTGTGTTTCCTAAGTAGCTGGAAAAAGAAAGTCTTAAAATTCAGAAAATTAA
ENSMUSG00000020431	Adcy1	8791	25	257	100	AAGGCTCAGGAGGCTATCTTGGGTTGTGTTTCCTAAGTAGCTGGAAAAAGAAAGTCTTAAAATTCAGAAAATTAACCACCATCATGCCACATCCTCGGTC
ENSMUSG00000020431	Adcy1	8791	25	258	100	GTGTTTCCTAAGTAGCTGGAAAAAGAAAGTCTTAAAATTCAGAAAATTAACCACCATCATGCCACATCCTCGGTCCTGCCAAGTGCTGGTCATTTAAAAT
ENSMUSG00000020431	Adcy1	8791	25	259	100	AAAGTCTTAAAATTCAGAAAATTAACCACCATCATGCCACATCCTCGGTCCTGCCAAGTGCTGGTCATTTAAAATTCTAACGAATTTTCTTCAGCATGTT
ENSMUSG00000020431	Adcy1	8791	25	260	100	CCACCATCATGCCACATCCTCGGTCCTGCCAAGTGCTGGTCATTTAAAATTCTAACGAATTTTCTTCAGCATGTTGCTAGGCCTGCTCAGTCCACACTCA
ENSMUSG00000020431	Adcy1	8791	25	261	100	CTGCCAAGTGCTGGTCATTTAAAATTCTAACGAATTTTCTTCAGCATGTTGCTAGGCCTGCTCAGTCCACACTCACACAAGGAAGGTCAATCATTACCGC
ENSMUSG00000020431	Adcy1	8791	25	262	100	TCTAACGAATTTTCTTCAGCATGTTGCTAGGCCTGCTCAGTCCACACTCACACAAGGAAGGTCAATCATTACCGCCCCATTAGCAAACACCTTTAGGGGC
ENSMUSG00000020431	Adcy1	8791	25	263	100	GCTAGGCCTGCTCAGTCCACACTCACACAAGGAAGGTCAATCATTACCGCCCCATTAGCAAACACCTTTAGGGGCCTTTGGTATGGGGGTAAATTGATCA
ENSMUSG00000020431	Adcy1	8791	25	264	100	CACAAGGAAGGTCAATCATTACCGCCCCATTAGCAAACACCTTTAGGGGCCTTTGGTATGGGGGTAAATTGATCAAACATTCATTCCTAGTACTTCCATT
ENSMUSG00000020431	Adcy1	8791	25	265	100	CCCATTAGCAAACACCTTTAGGGGCCTTTGGTATGGGGGTAAATTGATCAAACATTCATTCCTAGTACTTCCATTTAGTTTTGCAATTCCAGGGCCCCTT
ENSMUSG00000020431	Adcy1	8791	25	266	100	CTTTGGTATGGGGGTAAATTGATCAAACATTCATTCCTAGTACTTCCATTTAGTTTTGCAATTCCAGGGCCCCTTCTGTGGGCTCCTTGTTCATGGGAAG
ENSMUSG00000020431	Adcy1	8791	25	267	100	AACATTCATTCCTAGTACTTCCATTTAGTTTTGCAATTCCAGGGCCCCTTCTGTGGGCTCCTTGTTCATGGGAAGGAAGTGGTTTGCTAATACTCAATAC
ENSMUSG00000020431	Adcy1	8791	25	268	100	TAGTTTTGCAATTCCAGGGCCCCTTCTGTGGGCTCCTTGTTCATGGGAAGGAAGTGGTTTGCTAATACTCAATACACATTGTCCTGAGAATGTGAGGCAG
ENSMUSG00000020431	Adcy1	8791	25	269	100	CTGTGGGCTCCTTGTTCATGGGAAGGAAGTGGTTTGCTAATACTCAATACACATTGTCCTGAGAATGTGAGGCAGAGAGGGAGGGGCCAGACCTCAACTG
ENSMUSG00000020431	Adcy1	8791	25	270	100	GAAGTGGTTTGCTAATACTCAATACACATTGTCCTGAGAATGTGAGGCAGAGAGGGAGGGGCCAGACCTCAACTGCTCATCTGATCAGGCCAAGCTGCGC
ENSMUSG00000020431	Adcy1	8791	25	271	100	ACATTGTCCTGAGAATGTGAGGCAGAGAGGGAGGGGCCAGACCTCAACTGCTCATCTGATCAGGCCAAGCTGCGCGTTTTCTGTTGCAGTTAAGGTCTCT
ENSMUSG00000020431	Adcy1	8791	25	272	100	AGAGGGAGGGGCCAGACCTCAACTGCTCATCTGATCAGGCCAAGCTGCGCGTTTTCTGTTGCAGTTAAGGTCTCTGCTAAGCCAGGTGAAATCTGTAAGA
ENSMUSG00000020431	Adcy1	8791	25	273	100	CTCATCTGATCAGGCCAAGCTGCGCGTTTTCTGTTGCAGTTAAGGTCTCTGCTAAGCCAGGTGAAATCTGTAAGAACTAGGCTGCTGTTGATGCTATCGT
ENSMUSG00000020431	Adcy1	8791	25	274	100	GTTTTCTGTTGCAGTTAAGGTCTCTGCTAAGCCAGGTGAAATCTGTAAGAACTAGGCTGCTGTTGATGCTATCGTCTATACAACAGTGCTTACCCAGTGT
ENSMUSG00000020431	Adcy1	8791	25	275	100	GCTAAGCCAGGTGAAATCTGTAAGAACTAGGCTGCTGTTGATGCTATCGTCTATACAACAGTGCTTACCCAGTGTGGTGCAGGGCACCTCATGGACGCGG
ENSMUSG00000020431	Adcy1	8791	25	276	100	ACTAGGCTGCTGTTGATGCTATCGTCTATACAACAGTGCTTACCCAGTGTGGTGCAGGGCACCTCATGGACGCGGGTCTCTTGTGGGCAAGAGTTGCTTG
ENSMUSG00000020431	Adcy1	8791	25	277	100	CTATACAACAGTGCTTACCCAGTGTGGTGCAGGGCACCTCATGGACGCGGGTCTCTTGTGGGCAAGAGTTGCTTGAAGCCCACATTTGGAGCATGTGGCC
ENSMUSG00000020431	Adcy1	8791	25	278	100	GGTGCAGGGCACCTCATGGACGCGGGTCTCTTGTGGGCAAGAGTTGCTTGAAGCCCACATTTGGAGCATGTGGCCAAGTGCTGTTTGGTTCTGTATTTCT
ENSMUSG00000020431	Adcy1	8791	25	279	100	GTCTCTTGTGGGCAAGAGTTGCTTGAAGCCCACATTTGGAGCATGTGGCCAAGTGCTGTTTGGTTCTGTATTTCTTGGCTTCTTGTTGCTAAATTGGAGC
ENSMUSG00000020431	Adcy1	8791	25	280	100	AAGCCCACATTTGGAGCATGTGGCCAAGTGCTGTTTGGTTCTGTATTTCTTGGCTTCTTGTTGCTAAATTGGAGCCGTTTGATTCTTTTCCGATCAGCTG
ENSMUSG00000020431	Adcy1	8791	25	281	100	AAGTGCTGTTTGGTTCTGTATTTCTTGGCTTCTTGTTGCTAAATTGGAGCCGTTTGATTCTTTTCCGATCAGCTGCATTCCTCCAAGGTTAGAGACACCA
ENSMUSG00000020431	Adcy1	8791	25	282	100	TGGCTTCTTGTTGCTAAATTGGAGCCGTTTGATTCTTTTCCGATCAGCTGCATTCCTCCAAGGTTAGAGACACCATTCCGAGCAAGAAATTAGAACCCCG
ENSMUSG00000020431	Adcy1	8791	25	283	100	CGTTTGATTCTTTTCCGATCAGCTGCATTCCTCCAAGGTTAGAGACACCATTCCGAGCAAGAAATTAGAACCCCGGCTTCAGCCTTATAGTGCCCTTGAT
ENSMUSG00000020431	Adcy1	8791	25	284	100	CATTCCTCCAAGGTTAGAGACACCATTCCGAGCAAGAAATTAGAACCCCGGCTTCAGCCTTATAGTGCCCTTGATAGTCTCAAAGGTTTTGAAATACAAA
ENSMUSG00000020431	Adcy1	8791	25	285	100	TTCCGAGCAAGAAATTAGAACCCCGGCTTCAGCCTTATAGTGCCCTTGATAGTCTCAAAGGTTTTGAAATACAAACTGACATTGTGTCTAGTGGCATCTT
ENSMUSG00000020431	Adcy1	8791	25	286	100	GCTTCAGCCTTATAGTGCCCTTGATAGTCTCAAAGGTTTTGAAATACAAACTGACATTGTGTCTAGTGGCATCTTCTTAAATCAATTTTTTTCTGAAAGG
ENSMUSG00000020431	Adcy1	8791	25	287	100	AGTCTCAAAGGTTTTGAAATACAAACTGACATTGTGTCTAGTGGCATCTTCTTAAATCAATTTTTTTCTGAAAGGCCTGACATCGAATAGGGACAGAGCT
ENSMUSG00000020431	Adcy1	8791	25	288	100	CTGACATTGTGTCTAGTGGCATCTTCTTAAATCAATTTTTTTCTGAAAGGCCTGACATCGAATAGGGACAGAGCTATGACATTCCTGTAGAGCCCAAGCC
ENSMUSG00000020431	Adcy1	8791	25	289	100	CTTAAATCAATTTTTTTCTGAAAGGCCTGACATCGAATAGGGACAGAGCTATGACATTCCTGTAGAGCCCAAGCCACACTGCCCAGCCAGCCTGGCTCCA
ENSMUSG00000020431	Adcy1	8791	25	290	100	CCTGACATCGAATAGGGACAGAGCTATGACATTCCTGTAGAGCCCAAGCCACACTGCCCAGCCAGCCTGGCTCCAGTTACAGCTCTTACATTCAATGCTC
ENSMUSG00000020431	Adcy1	8791	25	291	100	ATGACATTCCTGTAGAGCCCAAGCCACACTGCCCAGCCAGCCTGGCTCCAGTTACAGCTCTTACATTCAATGCTCTCATGCTTCCAGCAGGCAGGCACAG
ENSMUSG00000020431	Adcy1	8791	25	292	100	ACACTGCCCAGCCAGCCTGGCTCCAGTTACAGCTCTTACATTCAATGCTCTCATGCTTCCAGCAGGCAGGCACAGCAATGAGGGTGCCTTCCCAGGGACT
ENSMUSG00000020431	Adcy1	8791	25	293	100	GTTACAGCTCTTACATTCAATGCTCTCATGCTTCCAGCAGGCAGGCACAGCAATGAGGGTGCCTTCCCAGGGACTTCCCTGGGGGGTTAGAGAGAGTTCT
ENSMUSG00000020431	Adcy1	8791	25	294	100	TCATGCTTCCAGCAGGCAGGCACAGCAATGAGGGTGCCTTCCCAGGGACTTCCCTGGGGGGTTAGAGAGAGTTCTCCAGGAGTGCATAGAAAGCAAGGAA
ENSMUSG00000020431	Adcy1	8791	25	295	100	CAATGAGGGTGCCTTCCCAGGGACTTCCCTGGGGGGTTAGAGAGAGTTCTCCAGGAGTGCATAGAAAGCAAGGAAGGGGCAATGGTGCATGGCAGAAAGC
ENSMUSG00000020431	Adcy1	8791	25	296	100	TCCCTGGGGGGTTAGAGAGAGTTCTCCAGGAGTGCATAGAAAGCAAGGAAGGGGCAATGGTGCATGGCAGAAAGCATGGCTGCCTCTCCCATGTTACAGG
ENSMUSG00000020431	Adcy1	8791	25	297	100	CCAGGAGTGCATAGAAAGCAAGGAAGGGGCAATGGTGCATGGCAGAAAGCATGGCTGCCTCTCCCATGTTACAGGAGCCCCATACGCTTTCCAGGCACTG
ENSMUSG00000020431	Adcy1	8791	25	298	100	GGGGCAATGGTGCATGGCAGAAAGCATGGCTGCCTCTCCCATGTTACAGGAGCCCCATACGCTTTCCAGGCACTGGTTCCTGCCGATGCCAGACTACATC
ENSMUSG00000020431	Adcy1	8791	25	299	100	ATGGCTGCCTCTCCCATGTTACAGGAGCCCCATACGCTTTCCAGGCACTGGTTCCTGCCGATGCCAGACTACATCCACTTCAGATGTATTGGTTTCCAAA
ENSMUSG00000020431	Adcy1	8791	25	300	100	AGCCCCATACGCTTTCCAGGCACTGGTTCCTGCCGATGCCAGACTACATCCACTTCAGATGTATTGGTTTCCAAACATTTCCAGCCATTTGCTGAGAATT
ENSMUSG00000020431	Adcy1	8791	25	301	100	GTTCCTGCCGATGCCAGACTACATCCACTTCAGATGTATTGGTTTCCAAACATTTCCAGCCATTTGCTGAGAATTAGCATTTCAACGGACATGCTATCTG
ENSMUSG00000020431	Adcy1	8791	25	302	100	CACTTCAGATGTATTGGTTTCCAAACATTTCCAGCCATTTGCTGAGAATTAGCATTTCAACGGACATGCTATCTGAGACTGACTCCAGAAATCTCTTAGA
ENSMUSG00000020431	Adcy1	8791	25	303	100	CATTTCCAGCCATTTGCTGAGAATTAGCATTTCAACGGACATGCTATCTGAGACTGACTCCAGAAATCTCTTAGACTTCATAAACTTGTAGGATTGCCTG
ENSMUSG00000020431	Adcy1	8791	25	304	100	AGCATTTCAACGGACATGCTATCTGAGACTGACTCCAGAAATCTCTTAGACTTCATAAACTTGTAGGATTGCCTGCAAGAACATTTGCAGGCCACTTAGA
ENSMUSG00000020431	Adcy1	8791	25	305	100	AGACTGACTCCAGAAATCTCTTAGACTTCATAAACTTGTAGGATTGCCTGCAAGAACATTTGCAGGCCACTTAGATCTGTCTGGGGTGGTCCCCCCTGCT
ENSMUSG00000020431	Adcy1	8791	25	306	100	CTTCATAAACTTGTAGGATTGCCTGCAAGAACATTTGCAGGCCACTTAGATCTGTCTGGGGTGGTCCCCCCTGCTCCATGGCACAGCATTGGGAAGTGGG
ENSMUSG00000020431	Adcy1	8791	25	307	100	CAAGAACATTTGCAGGCCACTTAGATCTGTCTGGGGTGGTCCCCCCTGCTCCATGGCACAGCATTGGGAAGTGGGCCTGACAGCAGCCAGAAACTTGTTT
ENSMUSG00000020431	Adcy1	8791	25	308	100	TCTGTCTGGGGTGGTCCCCCCTGCTCCATGGCACAGCATTGGGAAGTGGGCCTGACAGCAGCCAGAAACTTGTTTCTCACCTCCCACCAGCAACCTCCAC
ENSMUSG00000020431	Adcy1	8791	25	309	100	CCATGGCACAGCATTGGGAAGTGGGCCTGACAGCAGCCAGAAACTTGTTTCTCACCTCCCACCAGCAACCTCCACTCAGCCCCAGACCCCAGGCACATGA
ENSMUSG00000020431	Adcy1	8791	25	310	100	CCTGACAGCAGCCAGAAACTTGTTTCTCACCTCCCACCAGCAACCTCCACTCAGCCCCAGACCCCAGGCACATGAAGCACAAGTCTCAGGGGACCGTTCC
ENSMUSG00000020431	Adcy1	8791	25	311	100	CTCACCTCCCACCAGCAACCTCCACTCAGCCCCAGACCCCAGGCACATGAAGCACAAGTCTCAGGGGACCGTTCCCATGCTGTGGGGAGCCCAAGGAAGC
ENSMUSG00000020431	Adcy1	8791	25	312	100	TCAGCCCCAGACCCCAGGCACATGAAGCACAAGTCTCAGGGGACCGTTCCCATGCTGTGGGGAGCCCAAGGAAGCCCCCAGCATCTCTTGCATACACCAC
ENSMUSG00000020431	Adcy1	8791	25	313	100	AGCACAAGTCTCAGGGGACCGTTCCCATGCTGTGGGGAGCCCAAGGAAGCCCCCAGCATCTCTTGCATACACCACTGGCAGTGTGGGCACAACTGGCCAC
ENSMUSG00000020431	Adcy1	8791	25	314	100	CATGCTGTGGGGAGCCCAAGGAAGCCCCCAGCATCTCTTGCATACACCACTGGCAGTGTGGGCACAACTGGCCACCAGGAGCACACATGCCTGGGGAAGA
ENSMUSG00000020431	Adcy1	8791	25	315	100	CCCCAGCATCTCTTGCATACACCACTGGCAGTGTGGGCACAACTGGCCACCAGGAGCACACATGCCTGGGGAAGAGGGGCCTGCTCTGTTGCCTTCATCC
ENSMUSG00000020431	Adcy1	8791	25	316	100	TGGCAGTGTGGGCACAACTGGCCACCAGGAGCACACATGCCTGGGGAAGAGGGGCCTGCTCTGTTGCCTTCATCCCTGTTAAAATTGAGTATATGCAAGC
ENSMUSG00000020431	Adcy1	8791	25	317	100	CAGGAGCACACATGCCTGGGGAAGAGGGGCCTGCTCTGTTGCCTTCATCCCTGTTAAAATTGAGTATATGCAAGCCATTTGCACTACGGAATTGCATGCC
ENSMUSG00000020431	Adcy1	8791	25	318	100	GGGGCCTGCTCTGTTGCCTTCATCCCTGTTAAAATTGAGTATATGCAAGCCATTTGCACTACGGAATTGCATGCCTTGAAATTCCTTACTGTGTGCACCT
ENSMUSG00000020431	Adcy1	8791	25	319	100	CTGTTAAAATTGAGTATATGCAAGCCATTTGCACTACGGAATTGCATGCCTTGAAATTCCTTACTGTGTGCACCTTAGTTTGAATTTGACGTTATGTAGC
ENSMUSG00000020431	Adcy1	8791	25	320	100	CATTTGCACTACGGAATTGCATGCCTTGAAATTCCTTACTGTGTGCACCTTAGTTTGAATTTGACGTTATGTAGCATGCACAAAAGAATGGATGGGCTTG
ENSMUSG00000020431	Adcy1	8791	25	321	100	TTGAAATTCCTTACTGTGTGCACCTTAGTTTGAATTTGACGTTATGTAGCATGCACAAAAGAATGGATGGGCTTGGGCTTGTTCCCAAGTCACCTCTACC
ENSMUSG00000020431	Adcy1	8791	25	322	100	TAGTTTGAATTTGACGTTATGTAGCATGCACAAAAGAATGGATGGGCTTGGGCTTGTTCCCAAGTCACCTCTACCGCTCATTGGGAGCACAGTGCTGCCC
ENSMUSG00000020431	Adcy1	8791	25	323	100	ATGCACAAAAGAATGGATGGGCTTGGGCTTGTTCCCAAGTCACCTCTACCGCTCATTGGGAGCACAGTGCTGCCCTCAGCCAATCCCAGGTTCCGTGGAG
ENSMUSG00000020431	Adcy1	8791	25	324	100	GGCTTGTTCCCAAGTCACCTCTACCGCTCATTGGGAGCACAGTGCTGCCCTCAGCCAATCCCAGGTTCCGTGGAGCCCGTGTGGCTCCAGCACTTACTGT
ENSMUSG00000020431	Adcy1	8791	25	325	100	GCTCATTGGGAGCACAGTGCTGCCCTCAGCCAATCCCAGGTTCCGTGGAGCCCGTGTGGCTCCAGCACTTACTGTGCAGTGGCTCCCTTTCCCACCGTGC
ENSMUSG00000020431	Adcy1	8791	25	326	100	TCAGCCAATCCCAGGTTCCGTGGAGCCCGTGTGGCTCCAGCACTTACTGTGCAGTGGCTCCCTTTCCCACCGTGCTCCCTTTCCCACCGTGCCCACTTAA
ENSMUSG00000020431	Adcy1	8791	25	327	100	CCCGTGTGGCTCCAGCACTTACTGTGCAGTGGCTCCCTTTCCCACCGTGCTCCCTTTCCCACCGTGCCCACTTAAGCTGATGGCTCACTAATTTGCACAA
ENSMUSG00000020431	Adcy1	8791	25	328	100	GCAGTGGCTCCCTTTCCCACCGTGCTCCCTTTCCCACCGTGCCCACTTAAGCTGATGGCTCACTAATTTGCACAAATGGAATTGTTATGATCACGTCTTA
ENSMUSG00000020431	Adcy1	8791	25	329	100	TCCCTTTCCCACCGTGCCCACTTAAGCTGATGGCTCACTAATTTGCACAAATGGAATTGTTATGATCACGTCTTAGCAGTATCTTGATTTAAAGTAAGCC
ENSMUSG00000020431	Adcy1	8791	25	330	100	GCTGATGGCTCACTAATTTGCACAAATGGAATTGTTATGATCACGTCTTAGCAGTATCTTGATTTAAAGTAAGCCCAAAGCCCACTTCTGGAGTTCCTTA
ENSMUSG00000020431	Adcy1	8791	25	331	100	ATGGAATTGTTATGATCACGTCTTAGCAGTATCTTGATTTAAAGTAAGCCCAAAGCCCACTTCTGGAGTTCCTTACTTAAAAAAAAAAAAAAGAAAAGAA
ENSMUSG00000020431	Adcy1	8791	25	332	100	GCAGTATCTTGATTTAAAGTAAGCCCAAAGCCCACTTCTGGAGTTCCTTACTTAAAAAAAAAAAAAAGAAAAGAAAAAAAAAAGGCATGTGTAAGCACCT
ENSMUSG00000020431	Adcy1	8791	25	333	100	CAAAGCCCACTTCTGGAGTTCCTTACTTAAAAAAAAAAAAAAGAAAAGAAAAAAAAAAGGCATGTGTAAGCACCTGTGTCCTGTGTTTATCAAGAAAGCT
ENSMUSG00000020431	Adcy1	8791	25	334	100	CTTAAAAAAAAAAAAAAGAAAAGAAAAAAAAAAGGCATGTGTAAGCACCTGTGTCCTGTGTTTATCAAGAAAGCTTTGAGTCCCTTAGTGGGATAGAGGG
ENSMUSG00000020431	Adcy1	8791	25	335	100	AAAAAAAAGGCATGTGTAAGCACCTGTGTCCTGTGTTTATCAAGAAAGCTTTGAGTCCCTTAGTGGGATAGAGGGTGCATGGACAAAGGGGGCATTTTAT
ENSMUSG00000020431	Adcy1	8791	25	336	100	GTGTCCTGTGTTTATCAAGAAAGCTTTGAGTCCCTTAGTGGGATAGAGGGTGCATGGACAAAGGGGGCATTTTATCCCACACGATACACTTACCAGATGT
ENSMUSG00000020431	Adcy1	8791	25	337	100	TTGAGTCCCTTAGTGGGATAGAGGGTGCATGGACAAAGGGGGCATTTTATCCCACACGATACACTTACCAGATGTGTCTGTAGCTATGAGAACTCGATGA
ENSMUSG00000020431	Adcy1	8791	25	338	100	TGCATGGACAAAGGGGGCATTTTATCCCACACGATACACTTACCAGATGTGTCTGTAGCTATGAGAACTCGATGATTATATTCACAATAACTCAATATCA
ENSMUSG00000020431	Adcy1	8791	25	339	100	CCCACACGATACACTTACCAGATGTGTCTGTAGCTATGAGAACTCGATGATTATATTCACAATAACTCAATATCACTGGGTAACCTCTCACAATAGATTT
ENSMUSG00000020431	Adcy1	8791	25	340	100	GTCTGTAGCTATGAGAACTCGATGATTATATTCACAATAACTCAATATCACTGGGTAACCTCTCACAATAGATTTGTATAATCAATACGGGTCTATTTTT
ENSMUSG00000020431	Adcy1	8791	25	341	100	TTATATTCACAATAACTCAATATCACTGGGTAACCTCTCACAATAGATTTGTATAATCAATACGGGTCTATTTTTATGTCAACTCTGTAGAGCACCTTCC
ENSMUSG00000020431	Adcy1	8791	25	342	100	CTGGGTAACCTCTCACAATAGATTTGTATAATCAATACGGGTCTATTTTTATGTCAACTCTGTAGAGCACCTTCCAGTCTTTTTCAAGATTGTTAAATCG
ENSMUSG00000020431	Adcy1	8791	25	343	100	GTATAATCAATACGGGTCTATTTTTATGTCAACTCTGTAGAGCACCTTCCAGTCTTTTTCAAGATTGTTAAATCGAGATGAGTAATTGAATAATTTGTCC
ENSMUSG00000020431	Adcy1	8791	25	344	100	ATGTCAACTCTGTAGAGCACCTTCCAGTCTTTTTCAAGATTGTTAAATCGAGATGAGTAATTGAATAATTTGTCCTATTTTTATTTAAAAAGTGAATGAA
ENSMUSG00000020431	Adcy1	8791	25	345	100	AGTCTTTTTCAAGATTGTTAAATCGAGATGAGTAATTGAATAATTTGTCCTATTTTTATTTAAAAAGTGAATGAACTGAAATGTTAATGTGAATGTACAT
ENSMUSG00000020431	Adcy1	8791	25	346	100	AGATGAGTAATTGAATAATTTGTCCTATTTTTATTTAAAAAGTGAATGAACTGAAATGTTAATGTGAATGTACATTTCTTAACTGCAACTTTTCTACTGA
ENSMUSG00000020431	Adcy1	8791	25	347	100	TATTTTTATTTAAAAAGTGAATGAACTGAAATGTTAATGTGAATGTACATTTCTTAACTGCAACTTTTCTACTGAGTGTTTGCACTATACTCTCTGGGGT
ENSMUSG00000020431	Adcy1	8791	25	348	100	CTGAAATGTTAATGTGAATGTACATTTCTTAACTGCAACTTTTCTACTGAGTGTTTGCACTATACTCTCTGGGGTCTTATTTAACAAAAATAAAGGAGAA
ENSMUSG00000020431	Adcy1	8791	25	349	91	TTCTTAACTGCAACTTTTCTACTGAGTGTTTGCACTATACTCTCTGGGGTCTTATTTAACAAAAATAAAGGAGAAAAATTGCTTGACTAAA
ENSMUSG00000020684	Rasl10b	2473	25	1	100	TCGGCACCTCGGAGACGCCCATCATCATCGTGGGCAACAAGCGCGACCTGCAACGCGGACGCGTGATTCCACGCTGGAACGTGTCGCACTTGGTGCGCAA
ENSMUSG00000020684	Rasl10b	2473	25	2	100	CATCGTGGGCAACAAGCGCGACCTGCAACGCGGACGCGTGATTCCACGCTGGAACGTGTCGCACTTGGTGCGCAAGACCTGGAAGTGCGGCTACGTGGAG
ENSMUSG00000020684	Rasl10b	2473	25	3	100	CAACGCGGACGCGTGATTCCACGCTGGAACGTGTCGCACTTGGTGCGCAAGACCTGGAAGTGCGGCTACGTGGAGTGCTCGGCCAAGTACAACTGGCACA
ENSMUSG00000020684	Rasl10b	2473	25	4	100	GGAACGTGTCGCACTTGGTGCGCAAGACCTGGAAGTGCGGCTACGTGGAGTGCTCGGCCAAGTACAACTGGCACATCCTGCTGCTCTTCAGCGAGCTGCT
ENSMUSG00000020684	Rasl10b	2473	25	5	100	GACCTGGAAGTGCGGCTACGTGGAGTGCTCGGCCAAGTACAACTGGCACATCCTGCTGCTCTTCAGCGAGCTGCTCAAGAGTGTGGGCTGCGCCCGCTGC
ENSMUSG00000020684	Rasl10b	2473	25	6	100	TGCTCGGCCAAGTACAACTGGCACATCCTGCTGCTCTTCAGCGAGCTGCTCAAGAGTGTGGGCTGCGCCCGCTGCAAACACGTGCACGCTGCCCTGCGCT
ENSMUSG00000020684	Rasl10b	2473	25	7	100	TCCTGCTGCTCTTCAGCGAGCTGCTCAAGAGTGTGGGCTGCGCCCGCTGCAAACACGTGCACGCTGCCCTGCGCTTCCAGGGAGCGCTGCGCCGCAACCG
ENSMUSG00000020684	Rasl10b	2473	25	8	100	CAAGAGTGTGGGCTGCGCCCGCTGCAAACACGTGCACGCTGCCCTGCGCTTCCAGGGAGCGCTGCGCCGCAACCGCTGCGCCATCATGTGACGCCGCGTG
ENSMUSG00000020684	Rasl10b	2473	25	9	100	AAACACGTGCACGCTGCCCTGCGCTTCCAGGGAGCGCTGCGCCGCAACCGCTGCGCCATCATGTGACGCCGCGTGCGCCCTGCAGCAGCACTGTCCCAGC
ENSMUSG00000020684	Rasl10b	2473	25	10	100	TCCAGGGAGCGCTGCGCCGCAACCGCTGCGCCATCATGTGACGCCGCGTGCGCCCTGCAGCAGCACTGTCCCAGCGAAAGGCAGGGCAGGGCGGGGCCAG
ENSMUSG00000020684	Rasl10b	2473	25	11	100	CTGCGCCATCATGTGACGCCGCGTGCGCCCTGCAGCAGCACTGTCCCAGCGAAAGGCAGGGCAGGGCGGGGCCAGCCTCCCGCGGGACACCAGGGCCAGA
ENSMUSG00000020684	Rasl10b	2473	25	12	100	CGCCCTGCAGCAGCACTGTCCCAGCGAAAGGCAGGGCAGGGCGGGGCCAGCCTCCCGCGGGACACCAGGGCCAGAGCAGGAAACCCCCGGAGGAGAACTC
ENSMUSG00000020684	Rasl10b	2473	25	13	100	GAAAGGCAGGGCAGGGCGGGGCCAGCCTCCCGCGGGACACCAGGGCCAGAGCAGGAAACCCCCGGAGGAGAACTCTGGGCTCCGGGCCTGAAGCACCCCT
ENSMUSG00000020684	Rasl10b	2473	25	14	100	CCTCCCGCGGGACACCAGGGCCAGAGCAGGAAACCCCCGGAGGAGAACTCTGGGCTCCGGGCCTGAAGCACCCCTACAGCCACACACCTCCCCCACGAGA
ENSMUSG00000020684	Rasl10b	2473	25	15	100	GCAGGAAACCCCCGGAGGAGAACTCTGGGCTCCGGGCCTGAAGCACCCCTACAGCCACACACCTCCCCCACGAGAATCAGAGGGTGAGAGGGAGTCTCCC
ENSMUSG00000020684	Rasl10b	2473	25	16	100	TGGGCTCCGGGCCTGAAGCACCCCTACAGCCACACACCTCCCCCACGAGAATCAGAGGGTGAGAGGGAGTCTCCCCGCCACTCCCCAGTCCTCCCCTCCC
ENSMUSG00000020684	Rasl10b	2473	25	17	100	ACAGCCACACACCTCCCCCACGAGAATCAGAGGGTGAGAGGGAGTCTCCCCGCCACTCCCCAGTCCTCCCCTCCCACCTGGGTCTCCCTGGGTCAGTCAC
ENSMUSG00000020684	Rasl10b	2473	25	18	100	ATCAGAGGGTGAGAGGGAGTCTCCCCGCCACTCCCCAGTCCTCCCCTCCCACCTGGGTCTCCCTGGGTCAGTCACCTTCAGTGCTGTAGTGTAGTGCCCG
ENSMUSG00000020684	Rasl10b	2473	25	19	100	CGCCACTCCCCAGTCCTCCCCTCCCACCTGGGTCTCCCTGGGTCAGTCACCTTCAGTGCTGTAGTGTAGTGCCCGGCCCCAGGAGGGGCCACAACCTGTG
ENSMUSG00000020684	Rasl10b	2473	25	20	100	ACCTGGGTCTCCCTGGGTCAGTCACCTTCAGTGCTGTAGTGTAGTGCCCGGCCCCAGGAGGGGCCACAACCTGTGGGCCAAGGGGTGAGCTTGTGAAATG
ENSMUSG00000020684	Rasl10b	2473	25	21	100	CTTCAGTGCTGTAGTGTAGTGCCCGGCCCCAGGAGGGGCCACAACCTGTGGGCCAAGGGGTGAGCTTGTGAAATGGAGGGTGGGGTGAGGAGGTGCTGTC
ENSMUSG00000020684	Rasl10b	2473	25	22	100	GCCCCAGGAGGGGCCACAACCTGTGGGCCAAGGGGTGAGCTTGTGAAATGGAGGGTGGGGTGAGGAGGTGCTGTCTTGGCCAGGCCCCTGCCCATCTTCT
ENSMUSG00000020684	Rasl10b	2473	25	23	100	GGCCAAGGGGTGAGCTTGTGAAATGGAGGGTGGGGTGAGGAGGTGCTGTCTTGGCCAGGCCCCTGCCCATCTTCTCCACAGTGTATCTGTCTTTACCCCA
ENSMUSG00000020684	Rasl10b	2473	25	24	100	GAGGGTGGGGTGAGGAGGTGCTGTCTTGGCCAGGCCCCTGCCCATCTTCTCCACAGTGTATCTGTCTTTACCCCATGTCCCTCTTTCCAATGTCTGTCCT
ENSMUSG00000020684	Rasl10b	2473	25	25	100	TTGGCCAGGCCCCTGCCCATCTTCTCCACAGTGTATCTGTCTTTACCCCATGTCCCTCTTTCCAATGTCTGTCCTCTCAGGTGTCTGCCAGTCCTCATTT
ENSMUSG00000020684	Rasl10b	2473	25	26	100	CCACAGTGTATCTGTCTTTACCCCATGTCCCTCTTTCCAATGTCTGTCCTCTCAGGTGTCTGCCAGTCCTCATTTGTCCTGTCTACCTTCCGGTGTTTCT
ENSMUSG00000020684	Rasl10b	2473	25	27	100	TGTCCCTCTTTCCAATGTCTGTCCTCTCAGGTGTCTGCCAGTCCTCATTTGTCCTGTCTACCTTCCGGTGTTTCTCCCTGCTCCCCAGCTCCGCTCACAG
ENSMUSG00000020684	Rasl10b	2473	25	28	100	CTCAGGTGTCTGCCAGTCCTCATTTGTCCTGTCTACCTTCCGGTGTTTCTCCCTGCTCCCCAGCTCCGCTCACAGGGCTCTCATTTTGTCCGTCCCCTTG
ENSMUSG00000020684	Rasl10b	2473	25	29	100	GTCCTGTCTACCTTCCGGTGTTTCTCCCTGCTCCCCAGCTCCGCTCACAGGGCTCTCATTTTGTCCGTCCCCTTGTCGCGGATCCTGGCAGCTTTTTGAT
ENSMUSG00000020684	Rasl10b	2473	25	30	100	CCCTGCTCCCCAGCTCCGCTCACAGGGCTCTCATTTTGTCCGTCCCCTTGTCGCGGATCCTGGCAGCTTTTTGATGCCAGGCCTTCTCCCCGGCAGCGCC
ENSMUSG00000020684	Rasl10b	2473	25	31	100	GGCTCTCATTTTGTCCGTCCCCTTGTCGCGGATCCTGGCAGCTTTTTGATGCCAGGCCTTCTCCCCGGCAGCGCCACCGGCAAAGGGCAGAGAGATGCAA
ENSMUSG00000020684	Rasl10b	2473	25	32	100	TCGCGGATCCTGGCAGCTTTTTGATGCCAGGCCTTCTCCCCGGCAGCGCCACCGGCAAAGGGCAGAGAGATGCAAGTGTCCCAAGGACCGAAGCCAAGGG
ENSMUSG00000020684	Rasl10b	2473	25	33	100	GCCAGGCCTTCTCCCCGGCAGCGCCACCGGCAAAGGGCAGAGAGATGCAAGTGTCCCAAGGACCGAAGCCAAGGGGTCCGAGGGCTGAGGTCCGACAGCC
ENSMUSG00000020684	Rasl10b	2473	25	34	100	ACCGGCAAAGGGCAGAGAGATGCAAGTGTCCCAAGGACCGAAGCCAAGGGGTCCGAGGGCTGAGGTCCGACAGCCGTCAGGGAGAGAAGGCTGAGCTCTC
ENSMUSG00000020684	Rasl10b	2473	25	35	100	GTGTCCCAAGGACCGAAGCCAAGGGGTCCGAGGGCTGAGGTCCGACAGCCGTCAGGGAGAGAAGGCTGAGCTCTCCCTCATCCAGGGAGACCTCCCTGCC
ENSMUSG00000020684	Rasl10b	2473	25	36	100	GTCCGAGGGCTGAGGTCCGACAGCCGTCAGGGAGAGAAGGCTGAGCTCTCCCTCATCCAGGGAGACCTCCCTGCCCAGCAGCCCCCAGAGACGCAACCAC
ENSMUSG00000020684	Rasl10b	2473	25	37	100	GTCAGGGAGAGAAGGCTGAGCTCTCCCTCATCCAGGGAGACCTCCCTGCCCAGCAGCCCCCAGAGACGCAACCACCTACCTTCCAGCCTTAACTCAATGG
ENSMUSG00000020684	Rasl10b	2473	25	38	100	CCTCATCCAGGGAGACCTCCCTGCCCAGCAGCCCCCAGAGACGCAACCACCTACCTTCCAGCCTTAACTCAATGGTCCCTGCCGGGTGCCCCTCACCCCT
ENSMUSG00000020684	Rasl10b	2473	25	39	100	CAGCAGCCCCCAGAGACGCAACCACCTACCTTCCAGCCTTAACTCAATGGTCCCTGCCGGGTGCCCCTCACCCCTGACCCCAAAGCCAGATTGCCCCCGG
ENSMUSG00000020684	Rasl10b	2473	25	40	100	CTACCTTCCAGCCTTAACTCAATGGTCCCTGCCGGGTGCCCCTCACCCCTGACCCCAAAGCCAGATTGCCCCCGGGGCTAAAATTCTTTTTGTTTTGTTT
ENSMUSG00000020684	Rasl10b	2473	25	41	100	TCCCTGCCGGGTGCCCCTCACCCCTGACCCCAAAGCCAGATTGCCCCCGGGGCTAAAATTCTTTTTGTTTTGTTTGACGGTGTGGAGAGGAAACCTCTCA
ENSMUSG00000020684	Rasl10b	2473	25	42	100	GACCCCAAAGCCAGATTGCCCCCGGGGCTAAAATTCTTTTTGTTTTGTTTGACGGTGTGGAGAGGAAACCTCTCAAAGGATCATTTTCTCTCCTTGATGC
ENSMUSG00000020684	Rasl10b	2473	25	43	100	GGCTAAAATTCTTTTTGTTTTGTTTGACGGTGTGGAGAGGAAACCTCTCAAAGGATCATTTTCTCTCCTTGATGCTAGGTCCCACTTCTCTGTTATCTCC
ENSMUSG00000020684	Rasl10b	2473	25	44	100	GACGGTGTGGAGAGGAAACCTCTCAAAGGATCATTTTCTCTCCTTGATGCTAGGTCCCACTTCTCTGTTATCTCCTGCACTAGGGTGGGCTGCTACTACG
ENSMUSG00000020684	Rasl10b	2473	25	45	100	AAGGATCATTTTCTCTCCTTGATGCTAGGTCCCACTTCTCTGTTATCTCCTGCACTAGGGTGGGCTGCTACTACGTTGGGGGATGTGGAGTTTGTGGGGG
ENSMUSG00000020684	Rasl10b	2473	25	46	100	TAGGTCCCACTTCTCTGTTATCTCCTGCACTAGGGTGGGCTGCTACTACGTTGGGGGATGTGGAGTTTGTGGGGGACTGATGGTGGTGGGGAAGATGGTG
ENSMUSG00000020684	Rasl10b	2473	25	47	100	TGCACTAGGGTGGGCTGCTACTACGTTGGGGGATGTGGAGTTTGTGGGGGACTGATGGTGGTGGGGAAGATGGTGCCCGGGAGGGGGTCACGTTATGCTA
ENSMUSG00000020684	Rasl10b	2473	25	48	100	TTGGGGGATGTGGAGTTTGTGGGGGACTGATGGTGGTGGGGAAGATGGTGCCCGGGAGGGGGTCACGTTATGCTAGTGATGATTCTGTGTCCCTGTCCCC
ENSMUSG00000020684	Rasl10b	2473	25	49	100	ACTGATGGTGGTGGGGAAGATGGTGCCCGGGAGGGGGTCACGTTATGCTAGTGATGATTCTGTGTCCCTGTCCCCACCTCAGTTGAACTGCCTAAGATTC
ENSMUSG00000020684	Rasl10b	2473	25	50	100	CCCGGGAGGGGGTCACGTTATGCTAGTGATGATTCTGTGTCCCTGTCCCCACCTCAGTTGAACTGCCTAAGATTCTGCCTCCATCAGGTCTCAGGTTGTT
ENSMUSG00000020684	Rasl10b	2473	25	51	100	GTGATGATTCTGTGTCCCTGTCCCCACCTCAGTTGAACTGCCTAAGATTCTGCCTCCATCAGGTCTCAGGTTGTTTTGATCAGTCTCTGTAGGGGCAGAG
ENSMUSG00000020684	Rasl10b	2473	25	52	100	ACCTCAGTTGAACTGCCTAAGATTCTGCCTCCATCAGGTCTCAGGTTGTTTTGATCAGTCTCTGTAGGGGCAGAGCCAGGAAAAGAATAAGAATGAGGGA
ENSMUSG00000020684	Rasl10b	2473	25	53	100	TGCCTCCATCAGGTCTCAGGTTGTTTTGATCAGTCTCTGTAGGGGCAGAGCCAGGAAAAGAATAAGAATGAGGGAGTTGTGCCTGGGAAAGACAGGTGTG
ENSMUSG00000020684	Rasl10b	2473	25	54	100	TTGATCAGTCTCTGTAGGGGCAGAGCCAGGAAAAGAATAAGAATGAGGGAGTTGTGCCTGGGAAAGACAGGTGTGCATCCCCACTCATAGGTGGAGGCCT
ENSMUSG00000020684	Rasl10b	2473	25	55	100	CCAGGAAAAGAATAAGAATGAGGGAGTTGTGCCTGGGAAAGACAGGTGTGCATCCCCACTCATAGGTGGAGGCCTTCAGGATCTGACTGACCCCTTATCC
ENSMUSG00000020684	Rasl10b	2473	25	56	100	GTTGTGCCTGGGAAAGACAGGTGTGCATCCCCACTCATAGGTGGAGGCCTTCAGGATCTGACTGACCCCTTATCCCAACACTAGGTTGACCCTATGCCCT
ENSMUSG00000020684	Rasl10b	2473	25	57	100	CATCCCCACTCATAGGTGGAGGCCTTCAGGATCTGACTGACCCCTTATCCCAACACTAGGTTGACCCTATGCCCTAACTCACCCACCCCATTTTCCCCGG
ENSMUSG00000020684	Rasl10b	2473	25	58	100	TCAGGATCTGACTGACCCCTTATCCCAACACTAGGTTGACCCTATGCCCTAACTCACCCACCCCATTTTCCCCGGCTGCCTGGCCGGGTTTCTACCTCTC
ENSMUSG00000020684	Rasl10b	2473	25	59	100	CAACACTAGGTTGACCCTATGCCCTAACTCACCCACCCCATTTTCCCCGGCTGCCTGGCCGGGTTTCTACCTCTCGTCACCGGAGCTGATCACTGTCAGT
ENSMUSG00000020684	Rasl10b	2473	25	60	100	AACTCACCCACCCCATTTTCCCCGGCTGCCTGGCCGGGTTTCTACCTCTCGTCACCGGAGCTGATCACTGTCAGTTTTGTACCGATTTAGAAATAATAAT
ENSMUSG00000020684	Rasl10b	2473	25	61	100	CTGCCTGGCCGGGTTTCTACCTCTCGTCACCGGAGCTGATCACTGTCAGTTTTGTACCGATTTAGAAATAATAATAATGGAGATTCCAGGAATGGCCTGA
ENSMUSG00000020684	Rasl10b	2473	25	62	100	GTCACCGGAGCTGATCACTGTCAGTTTTGTACCGATTTAGAAATAATAATAATGGAGATTCCAGGAATGGCCTGAGGGATTGCTCGGGGACTTGGAGGGA
ENSMUSG00000020684	Rasl10b	2473	25	63	100	TTTGTACCGATTTAGAAATAATAATAATGGAGATTCCAGGAATGGCCTGAGGGATTGCTCGGGGACTTGGAGGGAGGGAGGAAGAAGTGGTTCCATGTCC
ENSMUSG00000020684	Rasl10b	2473	25	64	100	AATGGAGATTCCAGGAATGGCCTGAGGGATTGCTCGGGGACTTGGAGGGAGGGAGGAAGAAGTGGTTCCATGTCCCCTGCCCCGGCCAAAGAAAGTTCCT
ENSMUSG00000020684	Rasl10b	2473	25	65	100	GGGATTGCTCGGGGACTTGGAGGGAGGGAGGAAGAAGTGGTTCCATGTCCCCTGCCCCGGCCAAAGAAAGTTCCTGAGGCTGAACCCTCAGCCTCAGCCC
ENSMUSG00000020684	Rasl10b	2473	25	66	100	GGGAGGAAGAAGTGGTTCCATGTCCCCTGCCCCGGCCAAAGAAAGTTCCTGAGGCTGAACCCTCAGCCTCAGCCCTGGTCCAGTTGGGAGCATAAGGACC
ENSMUSG00000020684	Rasl10b	2473	25	67	100	CCTGCCCCGGCCAAAGAAAGTTCCTGAGGCTGAACCCTCAGCCTCAGCCCTGGTCCAGTTGGGAGCATAAGGACCCTTTGTCAAGAGGGGTACATAGGAC
ENSMUSG00000020684	Rasl10b	2473	25	68	100	GAGGCTGAACCCTCAGCCTCAGCCCTGGTCCAGTTGGGAGCATAAGGACCCTTTGTCAAGAGGGGTACATAGGACGCCTGTACACAGGGGTACATAGCCT
ENSMUSG00000020684	Rasl10b	2473	25	69	100	TGGTCCAGTTGGGAGCATAAGGACCCTTTGTCAAGAGGGGTACATAGGACGCCTGTACACAGGGGTACATAGCCTTTGCCAAGGCTGCAGTGCACAGACC
ENSMUSG00000020684	Rasl10b	2473	25	70	100	CTTTGTCAAGAGGGGTACATAGGACGCCTGTACACAGGGGTACATAGCCTTTGCCAAGGCTGCAGTGCACAGACCAGGAAATCAGGTACCCAGAGAGGTG
ENSMUSG00000020684	Rasl10b	2473	25	71	100	GCCTGTACACAGGGGTACATAGCCTTTGCCAAGGCTGCAGTGCACAGACCAGGAAATCAGGTACCCAGAGAGGTGATGGGGAGGAATCTGGGGCAGGGGT
ENSMUSG00000020684	Rasl10b	2473	25	72	100	TTGCCAAGGCTGCAGTGCACAGACCAGGAAATCAGGTACCCAGAGAGGTGATGGGGAGGAATCTGGGGCAGGGGTGGGATGGGGAATTTATGGTGTTCCC
ENSMUSG00000020684	Rasl10b	2473	25	73	100	AGGAAATCAGGTACCCAGAGAGGTGATGGGGAGGAATCTGGGGCAGGGGTGGGATGGGGAATTTATGGTGTTCCCGTGTGGGAGGGAATCTATGATTCTC
ENSMUSG00000020684	Rasl10b	2473	25	74	100	ATGGGGAGGAATCTGGGGCAGGGGTGGGATGGGGAATTTATGGTGTTCCCGTGTGGGAGGGAATCTATGATTCTCTCTATTGCTTCCCTACTGAATCTCA
ENSMUSG00000020684	Rasl10b	2473	25	75	100	GGGATGGGGAATTTATGGTGTTCCCGTGTGGGAGGGAATCTATGATTCTCTCTATTGCTTCCCTACTGAATCTCACTCCCTCTACCCAGCAGGGGGCACT
ENSMUSG00000020684	Rasl10b	2473	25	76	100	GTGTGGGAGGGAATCTATGATTCTCTCTATTGCTTCCCTACTGAATCTCACTCCCTCTACCCAGCAGGGGGCACTGCAGTACAACAGCAGCCCTCACTTT
ENSMUSG00000020684	Rasl10b	2473	25	77	100	TCTATTGCTTCCCTACTGAATCTCACTCCCTCTACCCAGCAGGGGGCACTGCAGTACAACAGCAGCCCTCACTTTGGACAGCCCAGCATTCTGGGTTCTA
ENSMUSG00000020684	Rasl10b	2473	25	78	100	CTCCCTCTACCCAGCAGGGGGCACTGCAGTACAACAGCAGCCCTCACTTTGGACAGCCCAGCATTCTGGGTTCTAGTCCTTGCTGTCCTGCACAATTTTG
ENSMUSG00000020684	Rasl10b	2473	25	79	100	GCAGTACAACAGCAGCCCTCACTTTGGACAGCCCAGCATTCTGGGTTCTAGTCCTTGCTGTCCTGCACAATTTTGGGCTAGCGATTTGCCCTCTCTGAGC
ENSMUSG00000020684	Rasl10b	2473	25	80	100	GGACAGCCCAGCATTCTGGGTTCTAGTCCTTGCTGTCCTGCACAATTTTGGGCTAGCGATTTGCCCTCTCTGAGCCTCCCTCTGAAACAGAGGCGGTGGC
ENSMUSG00000020684	Rasl10b	2473	25	81	100	GTCCTTGCTGTCCTGCACAATTTTGGGCTAGCGATTTGCCCTCTCTGAGCCTCCCTCTGAAACAGAGGCGGTGGCTCCCCTCCCCCACACTTCAGAGTGG
ENSMUSG00000020684	Rasl10b	2473	25	82	100	GGCTAGCGATTTGCCCTCTCTGAGCCTCCCTCTGAAACAGAGGCGGTGGCTCCCCTCCCCCACACTTCAGAGTGGCTGGGAGGGTAAGGAGGAGGGGTGC
ENSMUSG00000020684	Rasl10b	2473	25	83	100	CTCCCTCTGAAACAGAGGCGGTGGCTCCCCTCCCCCACACTTCAGAGTGGCTGGGAGGGTAAGGAGGAGGGGTGCCCACTTTCCTCTCCTGCAGCCCCAC
ENSMUSG00000020684	Rasl10b	2473	25	84	100	TCCCCTCCCCCACACTTCAGAGTGGCTGGGAGGGTAAGGAGGAGGGGTGCCCACTTTCCTCTCCTGCAGCCCCACCACTGGCTCCTCGGGGTGTGGGGTA
ENSMUSG00000020684	Rasl10b	2473	25	85	100	CTGGGAGGGTAAGGAGGAGGGGTGCCCACTTTCCTCTCCTGCAGCCCCACCACTGGCTCCTCGGGGTGTGGGGTAAAGATGGCAGCCTCCCATGTGCCCG
ENSMUSG00000020684	Rasl10b	2473	25	86	100	CCACTTTCCTCTCCTGCAGCCCCACCACTGGCTCCTCGGGGTGTGGGGTAAAGATGGCAGCCTCCCATGTGCCCGATCACCCCCTTACTCTGGGGCACTC
ENSMUSG00000020684	Rasl10b	2473	25	87	100	CACTGGCTCCTCGGGGTGTGGGGTAAAGATGGCAGCCTCCCATGTGCCCGATCACCCCCTTACTCTGGGGCACTCCAGGAGAGGGTGGAGGATCCAGACC
ENSMUSG00000020684	Rasl10b	2473	25	88	100	AAGATGGCAGCCTCCCATGTGCCCGATCACCCCCTTACTCTGGGGCACTCCAGGAGAGGGTGGAGGATCCAGACCTCTGGCTTGCCTCCACTGGGGAGTC
ENSMUSG00000020684	Rasl10b	2473	25	89	100	ATCACCCCCTTACTCTGGGGCACTCCAGGAGAGGGTGGAGGATCCAGACCTCTGGCTTGCCTCCACTGGGGAGTCATTGGAATGTAGCCCCCTCACCCTT
ENSMUSG00000020684	Rasl10b	2473	25	90	100	CAGGAGAGGGTGGAGGATCCAGACCTCTGGCTTGCCTCCACTGGGGAGTCATTGGAATGTAGCCCCCTCACCCTTTCCTCTTCACCCCAGGTCTTGGATT
ENSMUSG00000020684	Rasl10b	2473	25	91	100	TCTGGCTTGCCTCCACTGGGGAGTCATTGGAATGTAGCCCCCTCACCCTTTCCTCTTCACCCCAGGTCTTGGATTTCAGGTCCCTCCACCCCCCATTCTG
ENSMUSG00000020684	Rasl10b	2473	25	92	100	ATTGGAATGTAGCCCCCTCACCCTTTCCTCTTCACCCCAGGTCTTGGATTTCAGGTCCCTCCACCCCCCATTCTGAGTCTCCGTCCTTCCCCTCCCCAAC
ENSMUSG00000020684	Rasl10b	2473	25	93	100	TCCTCTTCACCCCAGGTCTTGGATTTCAGGTCCCTCCACCCCCCATTCTGAGTCTCCGTCCTTCCCCTCCCCAACCAGGGTTTCCCATGCAGGGTCTGGA
ENSMUSG00000020684	Rasl10b	2473	25	94	100	TCAGGTCCCTCCACCCCCCATTCTGAGTCTCCGTCCTTCCCCTCCCCAACCAGGGTTTCCCATGCAGGGTCTGGAAGTGTGTGTGACACCCACTGAGCTG
ENSMUSG00000020684	Rasl10b	2473	25	95	100	AGTCTCCGTCCTTCCCCTCCCCAACCAGGGTTTCCCATGCAGGGTCTGGAAGTGTGTGTGACACCCACTGAGCTGTTATTGGAAGTCAGATTAAAAATCA
ENSMUSG00000020684	Rasl10b	2473	25	96	98	CAGGGTTTCCCATGCAGGGTCTGGAAGTGTGTGTGACACCCACTGAGCTGTTATTGGAAGTCAGATTAAAAATCAGGGAGTGTTTTCCCTCGTTTCTC
ENSMUSG00000020821	Kif1c	3085	25	1	100	GTCCCACATGATGGGCAGACAGGGCCTAGTGGGGCCCTTGTTAGGAGGAAGGTGCCCACTGCTTCCCCAAGAAGCCCTGGGGCAAGGAGGCCAGAAAGCA
ENSMUSG00000020821	Kif1c	3085	25	2	100	CTAGTGGGGCCCTTGTTAGGAGGAAGGTGCCCACTGCTTCCCCAAGAAGCCCTGGGGCAAGGAGGCCAGAAAGCAGAGAGCAAGAGAGAGGGAAGGTCCG
ENSMUSG00000020821	Kif1c	3085	25	3	100	GGTGCCCACTGCTTCCCCAAGAAGCCCTGGGGCAAGGAGGCCAGAAAGCAGAGAGCAAGAGAGAGGGAAGGTCCGAGTAGGTGGTAGAAGATGCCAGAGA
ENSMUSG00000020821	Kif1c	3085	25	4	100	CCTGGGGCAAGGAGGCCAGAAAGCAGAGAGCAAGAGAGAGGGAAGGTCCGAGTAGGTGGTAGAAGATGCCAGAGAGTGTGCTGGAGGCTGAGGGAAGGAA
ENSMUSG00000020821	Kif1c	3085	25	5	100	GAGAGCAAGAGAGAGGGAAGGTCCGAGTAGGTGGTAGAAGATGCCAGAGAGTGTGCTGGAGGCTGAGGGAAGGAAGAGGGCGCGGAGTTGCCAGGAGCAA
ENSMUSG00000020821	Kif1c	3085	25	6	100	AGTAGGTGGTAGAAGATGCCAGAGAGTGTGCTGGAGGCTGAGGGAAGGAAGAGGGCGCGGAGTTGCCAGGAGCAAACCAAAGTCAAGGAGGGTCCGTAGG
ENSMUSG00000020821	Kif1c	3085	25	7	100	GTGTGCTGGAGGCTGAGGGAAGGAAGAGGGCGCGGAGTTGCCAGGAGCAAACCAAAGTCAAGGAGGGTCCGTAGGGAGTTGTCTTGGGGCTACCCGTTGC
ENSMUSG00000020821	Kif1c	3085	25	8	100	GAGGGCGCGGAGTTGCCAGGAGCAAACCAAAGTCAAGGAGGGTCCGTAGGGAGTTGTCTTGGGGCTACCCGTTGCAGGGGGGAGTCCCACAAACGCTGCT
ENSMUSG00000020821	Kif1c	3085	25	9	100	ACCAAAGTCAAGGAGGGTCCGTAGGGAGTTGTCTTGGGGCTACCCGTTGCAGGGGGGAGTCCCACAAACGCTGCTATGGGTGGGTGGGTGGGCTGGGGTC
ENSMUSG00000020821	Kif1c	3085	25	10	100	GAGTTGTCTTGGGGCTACCCGTTGCAGGGGGGAGTCCCACAAACGCTGCTATGGGTGGGTGGGTGGGCTGGGGTCTGCATAGCCAGTGTTTGACTTTCTT
ENSMUSG00000020821	Kif1c	3085	25	11	100	AGGGGGGAGTCCCACAAACGCTGCTATGGGTGGGTGGGTGGGCTGGGGTCTGCATAGCCAGTGTTTGACTTTCTTTTTGAGTGGGTGCAACGGGGAGAGA
ENSMUSG00000020821	Kif1c	3085	25	12	100	ATGGGTGGGTGGGTGGGCTGGGGTCTGCATAGCCAGTGTTTGACTTTCTTTTTGAGTGGGTGCAACGGGGAGAGAACCGAGAGTGAGGTGGGTTCTCCTC
ENSMUSG00000020821	Kif1c	3085	25	13	100	TGCATAGCCAGTGTTTGACTTTCTTTTTGAGTGGGTGCAACGGGGAGAGAACCGAGAGTGAGGTGGGTTCTCCTCCCCAGCTCTTGTCTGTCCGTCTATC
ENSMUSG00000020821	Kif1c	3085	25	14	100	TTTGAGTGGGTGCAACGGGGAGAGAACCGAGAGTGAGGTGGGTTCTCCTCCCCAGCTCTTGTCTGTCCGTCTATCCGTCTGTCTGTGGTGGATTTCTGTT
ENSMUSG00000020821	Kif1c	3085	25	15	100	ACCGAGAGTGAGGTGGGTTCTCCTCCCCAGCTCTTGTCTGTCCGTCTATCCGTCTGTCTGTGGTGGATTTCTGTTTCCAGGGAGGTGTGGTGGGATCCTA
ENSMUSG00000020821	Kif1c	3085	25	16	100	CCCAGCTCTTGTCTGTCCGTCTATCCGTCTGTCTGTGGTGGATTTCTGTTTCCAGGGAGGTGTGGTGGGATCCTAAGTCATTCCCTTCCCCTTCCAGGCC
ENSMUSG00000020821	Kif1c	3085	25	17	100	CGTCTGTCTGTGGTGGATTTCTGTTTCCAGGGAGGTGTGGTGGGATCCTAAGTCATTCCCTTCCCCTTCCAGGCCTCCTGCTATATTTAGGGGACCTGTC
ENSMUSG00000020821	Kif1c	3085	25	18	100	TCCAGGGAGGTGTGGTGGGATCCTAAGTCATTCCCTTCCCCTTCCAGGCCTCCTGCTATATTTAGGGGACCTGTCTGGTTTGGCTGGGGTCCCACAAAAA
ENSMUSG00000020821	Kif1c	3085	25	19	100	AGTCATTCCCTTCCCCTTCCAGGCCTCCTGCTATATTTAGGGGACCTGTCTGGTTTGGCTGGGGTCCCACAAAAATGTGGGACCTCTTAATAAAGGATAG
ENSMUSG00000020821	Kif1c	3085	25	20	100	TCCTGCTATATTTAGGGGACCTGTCTGGTTTGGCTGGGGTCCCACAAAAATGTGGGACCTCTTAATAAAGGATAGCAAACAGCTTGTGGTTGGTGGGTTT
ENSMUSG00000020821	Kif1c	3085	25	21	100	TGGTTTGGCTGGGGTCCCACAAAAATGTGGGACCTCTTAATAAAGGATAGCAAACAGCTTGTGGTTGGTGGGTTTTGGTAGCGGTTAAGGTTGTGCAAGT
ENSMUSG00000020821	Kif1c	3085	25	22	100	TGTGGGACCTCTTAATAAAGGATAGCAAACAGCTTGTGGTTGGTGGGTTTTGGTAGCGGTTAAGGTTGTGCAAGTAAAGTATCGTTTTACTAAGCGCGTC
ENSMUSG00000020821	Kif1c	3085	25	23	100	CAAACAGCTTGTGGTTGGTGGGTTTTGGTAGCGGTTAAGGTTGTGCAAGTAAAGTATCGTTTTACTAAGCGCGTCATCCCACGTCATTTCTGCATGTGCG
ENSMUSG00000020821	Kif1c	3085	25	24	100	TGGTAGCGGTTAAGGTTGTGCAAGTAAAGTATCGTTTTACTAAGCGCGTCATCCCACGTCATTTCTGCATGTGCGTGACCACCTCATCAGCGCTCCACGC
ENSMUSG00000020821	Kif1c	3085	25	25	100	AAAGTATCGTTTTACTAAGCGCGTCATCCCACGTCATTTCTGCATGTGCGTGACCACCTCATCAGCGCTCCACGCAGGCAATGCTGCCATCCTATTTTCT
ENSMUSG00000020821	Kif1c	3085	25	26	100	ATCCCACGTCATTTCTGCATGTGCGTGACCACCTCATCAGCGCTCCACGCAGGCAATGCTGCCATCCTATTTTCTTAAGTTGGAAACCTCCTGTTCTTCT
ENSMUSG00000020821	Kif1c	3085	25	27	100	TGACCACCTCATCAGCGCTCCACGCAGGCAATGCTGCCATCCTATTTTCTTAAGTTGGAAACCTCCTGTTCTTCTCTCCGGGGTACACAGCCTGTTCTTT
ENSMUSG00000020821	Kif1c	3085	25	28	100	AGGCAATGCTGCCATCCTATTTTCTTAAGTTGGAAACCTCCTGTTCTTCTCTCCGGGGTACACAGCCTGTTCTTTCATTTCTGTTTGCTCTGGGTCTCTG
ENSMUSG00000020821	Kif1c	3085	25	29	100	TAAGTTGGAAACCTCCTGTTCTTCTCTCCGGGGTACACAGCCTGTTCTTTCATTTCTGTTTGCTCTGGGTCTCTGCCCAGGTCCTGTACCCTCAGTGTCC
ENSMUSG00000020821	Kif1c	3085	25	30	100	CTCCGGGGTACACAGCCTGTTCTTTCATTTCTGTTTGCTCTGGGTCTCTGCCCAGGTCCTGTACCCTCAGTGTCCTTGACAAAGGAGGGAGGGCTGTGAG
ENSMUSG00000020821	Kif1c	3085	25	31	100	CATTTCTGTTTGCTCTGGGTCTCTGCCCAGGTCCTGTACCCTCAGTGTCCTTGACAAAGGAGGGAGGGCTGTGAGGGGCAGTGGGGTCTGTCAGTCTGTC
ENSMUSG00000020821	Kif1c	3085	25	32	100	CCCAGGTCCTGTACCCTCAGTGTCCTTGACAAAGGAGGGAGGGCTGTGAGGGGCAGTGGGGTCTGTCAGTCTGTCCGTGCCTAGGTGAAGGATTTGGGGT
ENSMUSG00000020821	Kif1c	3085	25	33	100	TTGACAAAGGAGGGAGGGCTGTGAGGGGCAGTGGGGTCTGTCAGTCTGTCCGTGCCTAGGTGAAGGATTTGGGGTTCTGCCTCACTGACTCACCTCACTT
ENSMUSG00000020821	Kif1c	3085	25	34	100	GGGCAGTGGGGTCTGTCAGTCTGTCCGTGCCTAGGTGAAGGATTTGGGGTTCTGCCTCACTGACTCACCTCACTTGTTTGGAAGGTGTCTGCTCGGGGAG
ENSMUSG00000020821	Kif1c	3085	25	35	100	CGTGCCTAGGTGAAGGATTTGGGGTTCTGCCTCACTGACTCACCTCACTTGTTTGGAAGGTGTCTGCTCGGGGAGTGTTGATCGGGCTTCCTGCACCACT
ENSMUSG00000020821	Kif1c	3085	25	36	100	TCTGCCTCACTGACTCACCTCACTTGTTTGGAAGGTGTCTGCTCGGGGAGTGTTGATCGGGCTTCCTGCACCACTTGTGTATTCTCATGTGTCACCCGAG
ENSMUSG00000020821	Kif1c	3085	25	37	100	GTTTGGAAGGTGTCTGCTCGGGGAGTGTTGATCGGGCTTCCTGCACCACTTGTGTATTCTCATGTGTCACCCGAGTCACTTGCCCTTCAGCGGGCCACAG
ENSMUSG00000020821	Kif1c	3085	25	38	100	TGTTGATCGGGCTTCCTGCACCACTTGTGTATTCTCATGTGTCACCCGAGTCACTTGCCCTTCAGCGGGCCACAGTCAACCTCCTGAGCAGCATTTTAAG
ENSMUSG00000020821	Kif1c	3085	25	39	100	TGTGTATTCTCATGTGTCACCCGAGTCACTTGCCCTTCAGCGGGCCACAGTCAACCTCCTGAGCAGCATTTTAAGACTTGCTTTCGAAGCCAGGCATTGT
ENSMUSG00000020821	Kif1c	3085	25	40	100	TCACTTGCCCTTCAGCGGGCCACAGTCAACCTCCTGAGCAGCATTTTAAGACTTGCTTTCGAAGCCAGGCATTGTGGTGCACATTTTGAATCCCCACAGG
ENSMUSG00000020821	Kif1c	3085	25	41	100	TCAACCTCCTGAGCAGCATTTTAAGACTTGCTTTCGAAGCCAGGCATTGTGGTGCACATTTTGAATCCCCACAGGAATAGGCAGATCTCTGAGTTGGAGG
ENSMUSG00000020821	Kif1c	3085	25	42	100	ACTTGCTTTCGAAGCCAGGCATTGTGGTGCACATTTTGAATCCCCACAGGAATAGGCAGATCTCTGAGTTGGAGGCCAGCCTGATCTACAGAGTGAGTTC
ENSMUSG00000020821	Kif1c	3085	25	43	100	GGTGCACATTTTGAATCCCCACAGGAATAGGCAGATCTCTGAGTTGGAGGCCAGCCTGATCTACAGAGTGAGTTCCAGTGTAGCCAGGGCTACACAGAGA
ENSMUSG00000020821	Kif1c	3085	25	44	100	AATAGGCAGATCTCTGAGTTGGAGGCCAGCCTGATCTACAGAGTGAGTTCCAGTGTAGCCAGGGCTACACAGAGAAACCCTGTCTCGAAAAAACAAAAAA
ENSMUSG00000020821	Kif1c	3085	25	45	100	CCAGCCTGATCTACAGAGTGAGTTCCAGTGTAGCCAGGGCTACACAGAGAAACCCTGTCTCGAAAAAACAAAAAAGAAAATCACTTTCTAGCTAGGCAGG
ENSMUSG00000020821	Kif1c	3085	25	46	100	CAGTGTAGCCAGGGCTACACAGAGAAACCCTGTCTCGAAAAAACAAAAAAGAAAATCACTTTCTAGCTAGGCAGGTATGTGTTGCCCTTCTTTGAATGAA
ENSMUSG00000020821	Kif1c	3085	25	47	100	AACCCTGTCTCGAAAAAACAAAAAAGAAAATCACTTTCTAGCTAGGCAGGTATGTGTTGCCCTTCTTTGAATGAAGCATTGGGATGCTGAGACAAGAAAA
ENSMUSG00000020821	Kif1c	3085	25	48	100	GAAAATCACTTTCTAGCTAGGCAGGTATGTGTTGCCCTTCTTTGAATGAAGCATTGGGATGCTGAGACAAGAAAATTGACACAGGTTCAAGACCAACCTA
ENSMUSG00000020821	Kif1c	3085	25	49	100	TATGTGTTGCCCTTCTTTGAATGAAGCATTGGGATGCTGAGACAAGAAAATTGACACAGGTTCAAGACCAACCTAAACTACACAAGACCTGGTTTTAAAT
ENSMUSG00000020821	Kif1c	3085	25	50	100	GCATTGGGATGCTGAGACAAGAAAATTGACACAGGTTCAAGACCAACCTAAACTACACAAGACCTGGTTTTAAATGATCACACTTCCCACAACCCAAAAT
ENSMUSG00000020821	Kif1c	3085	25	51	100	TTGACACAGGTTCAAGACCAACCTAAACTACACAAGACCTGGTTTTAAATGATCACACTTCCCACAACCCAAAATGGTTAAAACTTTTAAAAATAACTTA
ENSMUSG00000020821	Kif1c	3085	25	52	100	AACTACACAAGACCTGGTTTTAAATGATCACACTTCCCACAACCCAAAATGGTTAAAACTTTTAAAAATAACTTAGATGATGAATGTGAGTGTGGGTTTG
ENSMUSG00000020821	Kif1c	3085	25	53	100	GATCACACTTCCCACAACCCAAAATGGTTAAAACTTTTAAAAATAACTTAGATGATGAATGTGAGTGTGGGTTTGTGTGTATGAGTACCATGCCAGTGGA
ENSMUSG00000020821	Kif1c	3085	25	54	100	GGTTAAAACTTTTAAAAATAACTTAGATGATGAATGTGAGTGTGGGTTTGTGTGTATGAGTACCATGCCAGTGGAGGACAGAACAGTCTCATCTACATGG
ENSMUSG00000020821	Kif1c	3085	25	55	100	GATGATGAATGTGAGTGTGGGTTTGTGTGTATGAGTACCATGCCAGTGGAGGACAGAACAGTCTCATCTACATGGTGCGATGCTGGTATCCAACTCTGGT
ENSMUSG00000020821	Kif1c	3085	25	56	100	TGTGTATGAGTACCATGCCAGTGGAGGACAGAACAGTCTCATCTACATGGTGCGATGCTGGTATCCAACTCTGGTTCTCTTCAAGAAGAGAATGTACCTT
ENSMUSG00000020821	Kif1c	3085	25	57	100	GGACAGAACAGTCTCATCTACATGGTGCGATGCTGGTATCCAACTCTGGTTCTCTTCAAGAAGAGAATGTACCTTTAATCACTGAACTGTCTGCTCACCC
ENSMUSG00000020821	Kif1c	3085	25	58	100	TGCGATGCTGGTATCCAACTCTGGTTCTCTTCAAGAAGAGAATGTACCTTTAATCACTGAACTGTCTGCTCACCCTAGAGTTTAAAAAAAAAAAATCAAT
ENSMUSG00000020821	Kif1c	3085	25	59	100	TCTCTTCAAGAAGAGAATGTACCTTTAATCACTGAACTGTCTGCTCACCCTAGAGTTTAAAAAAAAAAAATCAATAATAAAAATTCAGAAAATTCGCTGC
ENSMUSG00000020821	Kif1c	3085	25	60	100	TAATCACTGAACTGTCTGCTCACCCTAGAGTTTAAAAAAAAAAAATCAATAATAAAAATTCAGAAAATTCGCTGCCTTTGTCTTTAACTCTAGTTTGAGT
ENSMUSG00000020821	Kif1c	3085	25	61	100	TAGAGTTTAAAAAAAAAAAATCAATAATAAAAATTCAGAAAATTCGCTGCCTTTGTCTTTAACTCTAGTTTGAGTAGCACGCTTAGGGATGCCACGTGAG
ENSMUSG00000020821	Kif1c	3085	25	62	100	AATAAAAATTCAGAAAATTCGCTGCCTTTGTCTTTAACTCTAGTTTGAGTAGCACGCTTAGGGATGCCACGTGAGAAGCTTGCAGGTTCACCTGTATCAA
ENSMUSG00000020821	Kif1c	3085	25	63	100	CTTTGTCTTTAACTCTAGTTTGAGTAGCACGCTTAGGGATGCCACGTGAGAAGCTTGCAGGTTCACCTGTATCAAGCATAGCCCTGAGCTTGCTGAGTCC
ENSMUSG00000020821	Kif1c	3085	25	64	100	AGCACGCTTAGGGATGCCACGTGAGAAGCTTGCAGGTTCACCTGTATCAAGCATAGCCCTGAGCTTGCTGAGTCCCTGAGTAACTGTGCTTTTATCTTGT
ENSMUSG00000020821	Kif1c	3085	25	65	100	AAGCTTGCAGGTTCACCTGTATCAAGCATAGCCCTGAGCTTGCTGAGTCCCTGAGTAACTGTGCTTTTATCTTGTTACTTAAACTGGGCTGCTACTCTGC
ENSMUSG00000020821	Kif1c	3085	25	66	100	GCATAGCCCTGAGCTTGCTGAGTCCCTGAGTAACTGTGCTTTTATCTTGTTACTTAAACTGGGCTGCTACTCTGCAGGGTCCTGAAGCCAGTCAGAGTTG
ENSMUSG00000020821	Kif1c	3085	25	67	100	CTGAGTAACTGTGCTTTTATCTTGTTACTTAAACTGGGCTGCTACTCTGCAGGGTCCTGAAGCCAGTCAGAGTTGTGCAAGCAGACAGATTGACCCAGAT
ENSMUSG00000020821	Kif1c	3085	25	68	100	TACTTAAACTGGGCTGCTACTCTGCAGGGTCCTGAAGCCAGTCAGAGTTGTGCAAGCAGACAGATTGACCCAGATCCTCCGAACTGACCCAGGGCTCTGA
ENSMUSG00000020821	Kif1c	3085	25	69	100	AGGGTCCTGAAGCCAGTCAGAGTTGTGCAAGCAGACAGATTGACCCAGATCCTCCGAACTGACCCAGGGCTCTGAGCAGGGCTAGCGTGCCGTTTGCAGT
ENSMUSG00000020821	Kif1c	3085	25	70	100	TGCAAGCAGACAGATTGACCCAGATCCTCCGAACTGACCCAGGGCTCTGAGCAGGGCTAGCGTGCCGTTTGCAGTTGGTTTCTTCTTCCCTCTGCTACTG
ENSMUSG00000020821	Kif1c	3085	25	71	100	CCTCCGAACTGACCCAGGGCTCTGAGCAGGGCTAGCGTGCCGTTTGCAGTTGGTTTCTTCTTCCCTCTGCTACTGGCTACCTTGATTTTGACACTTTTGA
ENSMUSG00000020821	Kif1c	3085	25	72	100	GCAGGGCTAGCGTGCCGTTTGCAGTTGGTTTCTTCTTCCCTCTGCTACTGGCTACCTTGATTTTGACACTTTTGATTGCTGGGTTTCCAGAAGCCTGTTG
ENSMUSG00000020821	Kif1c	3085	25	73	100	TGGTTTCTTCTTCCCTCTGCTACTGGCTACCTTGATTTTGACACTTTTGATTGCTGGGTTTCCAGAAGCCTGTTGACTGTGACTCGGGACCTGGAGTGTA
ENSMUSG00000020821	Kif1c	3085	25	74	100	GCTACCTTGATTTTGACACTTTTGATTGCTGGGTTTCCAGAAGCCTGTTGACTGTGACTCGGGACCTGGAGTGTAATGGCTAGTTTGGTAGCAGTGTTTA
ENSMUSG00000020821	Kif1c	3085	25	75	100	TTGCTGGGTTTCCAGAAGCCTGTTGACTGTGACTCGGGACCTGGAGTGTAATGGCTAGTTTGGTAGCAGTGTTTACTTGAGCGGGTTTATGATGTGGTTG
ENSMUSG00000020821	Kif1c	3085	25	76	100	ACTGTGACTCGGGACCTGGAGTGTAATGGCTAGTTTGGTAGCAGTGTTTACTTGAGCGGGTTTATGATGTGGTTGGGGAGAATAAGTGTAAGCAAGAAAA
ENSMUSG00000020821	Kif1c	3085	25	77	100	ATGGCTAGTTTGGTAGCAGTGTTTACTTGAGCGGGTTTATGATGTGGTTGGGGAGAATAAGTGTAAGCAAGAAAATGATAGAGTCCAAAGGTCTCTGCAG
ENSMUSG00000020821	Kif1c	3085	25	78	100	CTTGAGCGGGTTTATGATGTGGTTGGGGAGAATAAGTGTAAGCAAGAAAATGATAGAGTCCAAAGGTCTCTGCAGTCAGGGTGAGCTGTGTGGTGCAACG
ENSMUSG00000020821	Kif1c	3085	25	79	100	GGGAGAATAAGTGTAAGCAAGAAAATGATAGAGTCCAAAGGTCTCTGCAGTCAGGGTGAGCTGTGTGGTGCAACGTAGGAGAGTCCAGATGGGGGGTGGC
ENSMUSG00000020821	Kif1c	3085	25	80	100	TGATAGAGTCCAAAGGTCTCTGCAGTCAGGGTGAGCTGTGTGGTGCAACGTAGGAGAGTCCAGATGGGGGGTGGCGGGGAATGCCAGTCTCAGCTACCAC
ENSMUSG00000020821	Kif1c	3085	25	81	100	TCAGGGTGAGCTGTGTGGTGCAACGTAGGAGAGTCCAGATGGGGGGTGGCGGGGAATGCCAGTCTCAGCTACCACTGGGTGACCTTTCTCTAAGGACTGT
ENSMUSG00000020821	Kif1c	3085	25	82	100	TAGGAGAGTCCAGATGGGGGGTGGCGGGGAATGCCAGTCTCAGCTACCACTGGGTGACCTTTCTCTAAGGACTGTATCATGTAAATAGGTACTGCCTTTA
ENSMUSG00000020821	Kif1c	3085	25	83	100	GGGGAATGCCAGTCTCAGCTACCACTGGGTGACCTTTCTCTAAGGACTGTATCATGTAAATAGGTACTGCCTTTAAAAAATTGAATTCAGTCTTCCACTT
ENSMUSG00000020821	Kif1c	3085	25	84	100	TGGGTGACCTTTCTCTAAGGACTGTATCATGTAAATAGGTACTGCCTTTAAAAAATTGAATTCAGTCTTCCACTTCTGTCTTTAACAATGCGAATAGACG
ENSMUSG00000020821	Kif1c	3085	25	85	100	ATCATGTAAATAGGTACTGCCTTTAAAAAATTGAATTCAGTCTTCCACTTCTGTCTTTAACAATGCGAATAGACGGGATTTTATTCAGAGATTTGCCCAT
ENSMUSG00000020821	Kif1c	3085	25	86	100	AAAAATTGAATTCAGTCTTCCACTTCTGTCTTTAACAATGCGAATAGACGGGATTTTATTCAGAGATTTGCCCATGAGTGTCATGTACACGTGCCAGCCT
ENSMUSG00000020821	Kif1c	3085	25	87	100	CTGTCTTTAACAATGCGAATAGACGGGATTTTATTCAGAGATTTGCCCATGAGTGTCATGTACACGTGCCAGCCTGTGCTCTGCATCCCGTTTCATCCTT
ENSMUSG00000020821	Kif1c	3085	25	88	100	GGATTTTATTCAGAGATTTGCCCATGAGTGTCATGTACACGTGCCAGCCTGTGCTCTGCATCCCGTTTCATCCTTAACCCTGCTCCCATTTCAGATGGGG
ENSMUSG00000020821	Kif1c	3085	25	89	100	GAGTGTCATGTACACGTGCCAGCCTGTGCTCTGCATCCCGTTTCATCCTTAACCCTGCTCCCATTTCAGATGGGGAGACAGGTTTGATTGGAATGAGTTG
ENSMUSG00000020821	Kif1c	3085	25	90	100	GTGCTCTGCATCCCGTTTCATCCTTAACCCTGCTCCCATTTCAGATGGGGAGACAGGTTTGATTGGAATGAGTTGCCTAAGTGTGTAGTTCTTCGGTGGT
ENSMUSG00000020821	Kif1c	3085	25	91	100	AACCCTGCTCCCATTTCAGATGGGGAGACAGGTTTGATTGGAATGAGTTGCCTAAGTGTGTAGTTCTTCGGTGGTGAAGTTAGGGTTCTAACCCAGGCTA
ENSMUSG00000020821	Kif1c	3085	25	92	100	AGACAGGTTTGATTGGAATGAGTTGCCTAAGTGTGTAGTTCTTCGGTGGTGAAGTTAGGGTTCTAACCCAGGCTAACCTGGACTTCATCCAGCCCTCCAG
ENSMUSG00000020821	Kif1c	3085	25	93	100	CCTAAGTGTGTAGTTCTTCGGTGGTGAAGTTAGGGTTCTAACCCAGGCTAACCTGGACTTCATCCAGCCCTCCAGGACAGGGGTATTGTTCTCTCCAGGG
ENSMUSG00000020821	Kif1c	3085	25	94	100	GAAGTTAGGGTTCTAACCCAGGCTAACCTGGACTTCATCCAGCCCTCCAGGACAGGGGTATTGTTCTCTCCAGGGGCCACACTGCCCTGTCCCTTGGATC
ENSMUSG00000020821	Kif1c	3085	25	95	100	ACCTGGACTTCATCCAGCCCTCCAGGACAGGGGTATTGTTCTCTCCAGGGGCCACACTGCCCTGTCCCTTGGATCCTTCCAAGTGTATCATAAGCCTGCC
ENSMUSG00000020821	Kif1c	3085	25	96	100	GACAGGGGTATTGTTCTCTCCAGGGGCCACACTGCCCTGTCCCTTGGATCCTTCCAAGTGTATCATAAGCCTGCCCCTAGCTTCTGGTCTCTCCTGCTTT
ENSMUSG00000020821	Kif1c	3085	25	97	100	GCCACACTGCCCTGTCCCTTGGATCCTTCCAAGTGTATCATAAGCCTGCCCCTAGCTTCTGGTCTCTCCTGCTTTGTGCTATGAACGAGTGAGTGAGAGC
ENSMUSG00000020821	Kif1c	3085	25	98	100	CTTCCAAGTGTATCATAAGCCTGCCCCTAGCTTCTGGTCTCTCCTGCTTTGTGCTATGAACGAGTGAGTGAGAGCCGCTATTTCAGGAGCCTGCTCTAAA
ENSMUSG00000020821	Kif1c	3085	25	99	100	CCTAGCTTCTGGTCTCTCCTGCTTTGTGCTATGAACGAGTGAGTGAGAGCCGCTATTTCAGGAGCCTGCTCTAAAATCAGGGGATGTTGCCTGAGCAGTT
ENSMUSG00000020821	Kif1c	3085	25	100	100	GTGCTATGAACGAGTGAGTGAGAGCCGCTATTTCAGGAGCCTGCTCTAAAATCAGGGGATGTTGCCTGAGCAGTTCTCCGGCTTTCTGGCCCTCTCAGTT
ENSMUSG00000020821	Kif1c	3085	25	101	100	CGCTATTTCAGGAGCCTGCTCTAAAATCAGGGGATGTTGCCTGAGCAGTTCTCCGGCTTTCTGGCCCTCTCAGTTTTGGCACTGCTACAATGTCTCCCTT
ENSMUSG00000020821	Kif1c	3085	25	102	100	ATCAGGGGATGTTGCCTGAGCAGTTCTCCGGCTTTCTGGCCCTCTCAGTTTTGGCACTGCTACAATGTCTCCCTTGGTTTCCCTGGCAATGCAGTTTGCT
ENSMUSG00000020821	Kif1c	3085	25	103	100	CTCCGGCTTTCTGGCCCTCTCAGTTTTGGCACTGCTACAATGTCTCCCTTGGTTTCCCTGGCAATGCAGTTTGCTTTTCTTCCTTTGCCTCTTCAGAGGT
ENSMUSG00000020821	Kif1c	3085	25	104	100	TTGGCACTGCTACAATGTCTCCCTTGGTTTCCCTGGCAATGCAGTTTGCTTTTCTTCCTTTGCCTCTTCAGAGGTTTCTTCTGGTTAGTTGTACAGACTC
ENSMUSG00000020821	Kif1c	3085	25	105	100	GGTTTCCCTGGCAATGCAGTTTGCTTTTCTTCCTTTGCCTCTTCAGAGGTTTCTTCTGGTTAGTTGTACAGACTCGGGTGTCACCTGAGCTTTTTGTATC
ENSMUSG00000020821	Kif1c	3085	25	106	100	TTTCTTCCTTTGCCTCTTCAGAGGTTTCTTCTGGTTAGTTGTACAGACTCGGGTGTCACCTGAGCTTTTTGTATCGTGAATACATTTAGGGATCTTCTGC
ENSMUSG00000020821	Kif1c	3085	25	107	100	TTCTTCTGGTTAGTTGTACAGACTCGGGTGTCACCTGAGCTTTTTGTATCGTGAATACATTTAGGGATCTTCTGCTTCTTTTTGTCCCCCATATTTCCCA
ENSMUSG00000020821	Kif1c	3085	25	108	100	GGGTGTCACCTGAGCTTTTTGTATCGTGAATACATTTAGGGATCTTCTGCTTCTTTTTGTCCCCCATATTTCCCATCCCTTTATACACTAGGTTTGGTTT
ENSMUSG00000020821	Kif1c	3085	25	109	100	GTGAATACATTTAGGGATCTTCTGCTTCTTTTTGTCCCCCATATTTCCCATCCCTTTATACACTAGGTTTGGTTTGAAATTCTTTTCTCTTCTTTTCTTT
ENSMUSG00000020821	Kif1c	3085	25	110	100	TTCTTTTTGTCCCCCATATTTCCCATCCCTTTATACACTAGGTTTGGTTTGAAATTCTTTTCTCTTCTTTTCTTTTTTTTTTTAAATGGGGTTTTGTTTT
ENSMUSG00000020821	Kif1c	3085	25	111	100	TCCCTTTATACACTAGGTTTGGTTTGAAATTCTTTTCTCTTCTTTTCTTTTTTTTTTTAAATGGGGTTTTGTTTTGTTTTAGGTAGGAGACATTTATATA
ENSMUSG00000020821	Kif1c	3085	25	112	100	GAAATTCTTTTCTCTTCTTTTCTTTTTTTTTTTAAATGGGGTTTTGTTTTGTTTTAGGTAGGAGACATTTATATAGTCAGATTGGCTTCAAACTTGTGGT
ENSMUSG00000020821	Kif1c	3085	25	113	100	TTTTTTTTAAATGGGGTTTTGTTTTGTTTTAGGTAGGAGACATTTATATAGTCAGATTGGCTTCAAACTTGTGGTTTTCCTACCCCAGCCTCACAAATTC
ENSMUSG00000020821	Kif1c	3085	25	114	100	GTTTTAGGTAGGAGACATTTATATAGTCAGATTGGCTTCAAACTTGTGGTTTTCCTACCCCAGCCTCACAAATTCAGGGATTATGGAGGTTAACTACCAC
ENSMUSG00000020821	Kif1c	3085	25	115	100	GTCAGATTGGCTTCAAACTTGTGGTTTTCCTACCCCAGCCTCACAAATTCAGGGATTATGGAGGTTAACTACCACGTCTAGCATTCTTTGCTGATGTTGT
ENSMUSG00000020821	Kif1c	3085	25	116	100	TTTCCTACCCCAGCCTCACAAATTCAGGGATTATGGAGGTTAACTACCACGTCTAGCATTCTTTGCTGATGTTGTTTGTTTGTTTGTTTGTTTTTGAGAC
ENSMUSG00000020821	Kif1c	3085	25	117	100	AGGGATTATGGAGGTTAACTACCACGTCTAGCATTCTTTGCTGATGTTGTTTGTTTGTTTGTTTGTTTTTGAGACAGAGCCTCTCTGTATAGCCCTAGCT
ENSMUSG00000020821	Kif1c	3085	25	118	100	GTCTAGCATTCTTTGCTGATGTTGTTTGTTTGTTTGTTTGTTTTTGAGACAGAGCCTCTCTGTATAGCCCTAGCTGACCTGGAATCTGCTATGTAGACCA
ENSMUSG00000020821	Kif1c	3085	25	119	100	TTGTTTGTTTGTTTGTTTTTGAGACAGAGCCTCTCTGTATAGCCCTAGCTGACCTGGAATCTGCTATGTAGACCAAGCTAGTCTCCAATTTTCTTGTCTT
ENSMUSG00000020821	Kif1c	3085	25	120	110	AGAGCCTCTCTGTATAGCCCTAGCTGACCTGGAATCTGCTATGTAGACCAAGCTAGTCTCCAATTTTCTTGTCTTCTGAAGGAAGCTGAGATTAAAGGCATGTGTCATTA
ENSMUSG00000020914	Top2a	511	25	1	100	GGCAGAAGAGATTGTTTTAGGGATGGTTTTACGGAGCCAGTTTTATAGGTAGAATTCGGTCATATAGAACTGGTTAGTTCTAGTACAGATACAGTGCTCA
ENSMUSG00000020914	Top2a	511	25	2	100	GTTTTACGGAGCCAGTTTTATAGGTAGAATTCGGTCATATAGAACTGGTTAGTTCTAGTACAGATACAGTGCTCAACCTCTGACGTGATGCATTTTGTTT
ENSMUSG00000020914	Top2a	511	25	3	100	AGAATTCGGTCATATAGAACTGGTTAGTTCTAGTACAGATACAGTGCTCAACCTCTGACGTGATGCATTTTGTTTAAGCCATGAGAAGTTGCTCGTACCT
ENSMUSG00000020914	Top2a	511	25	4	100	AGTTCTAGTACAGATACAGTGCTCAACCTCTGACGTGATGCATTTTGTTTAAGCCATGAGAAGTTGCTCGTACCTTTTGAACATCGGAGGCTGGAGAAAG
ENSMUSG00000020914	Top2a	511	25	5	100	ACCTCTGACGTGATGCATTTTGTTTAAGCCATGAGAAGTTGCTCGTACCTTTTGAACATCGGAGGCTGGAGAAAGTCACCTTGACTGTGTCTTTATGACT
ENSMUSG00000020914	Top2a	511	25	6	100	AAGCCATGAGAAGTTGCTCGTACCTTTTGAACATCGGAGGCTGGAGAAAGTCACCTTGACTGTGTCTTTATGACTCAGCACAAGCAGCAAGGTGAGGAAA
ENSMUSG00000020914	Top2a	511	25	7	100	TTTGAACATCGGAGGCTGGAGAAAGTCACCTTGACTGTGTCTTTATGACTCAGCACAAGCAGCAAGGTGAGGAAAGTTAGGTCAGTTACGTAGAGTACTG
ENSMUSG00000020914	Top2a	511	25	8	100	TCACCTTGACTGTGTCTTTATGACTCAGCACAAGCAGCAAGGTGAGGAAAGTTAGGTCAGTTACGTAGAGTACTGACTCTACTCGGGATGCCTTCCCAAC
ENSMUSG00000020914	Top2a	511	25	9	100	CAGCACAAGCAGCAAGGTGAGGAAAGTTAGGTCAGTTACGTAGAGTACTGACTCTACTCGGGATGCCTTCCCAACACGAGATCCCTGGGAGGAGGCAGGA
ENSMUSG00000020914	Top2a	511	25	10	100	GTTAGGTCAGTTACGTAGAGTACTGACTCTACTCGGGATGCCTTCCCAACACGAGATCCCTGGGAGGAGGCAGGACTGCTCACGGTTACATCTCCAGGAT
ENSMUSG00000020914	Top2a	511	25	11	100	ACTCTACTCGGGATGCCTTCCCAACACGAGATCCCTGGGAGGAGGCAGGACTGCTCACGGTTACATCTCCAGGATCAACCAGGAAGTGGGATCCATTGCA
ENSMUSG00000020914	Top2a	511	25	12	100	ACGAGATCCCTGGGAGGAGGCAGGACTGCTCACGGTTACATCTCCAGGATCAACCAGGAAGTGGGATCCATTGCAGATCTCCATAATTCCAACTTGTGAC
ENSMUSG00000020914	Top2a	511	25	13	100	CTGCTCACGGTTACATCTCCAGGATCAACCAGGAAGTGGGATCCATTGCAGATCTCCATAATTCCAACTTGTGACTGCCAAGACCTTCTGTGCTGTTGTC
ENSMUSG00000020914	Top2a	511	25	14	100	CAACCAGGAAGTGGGATCCATTGCAGATCTCCATAATTCCAACTTGTGACTGCCAAGACCTTCTGTGCTGTTGTCTCTTATTTAAGTGCTGTTATCAATG
ENSMUSG00000020914	Top2a	511	25	15	100	GATCTCCATAATTCCAACTTGTGACTGCCAAGACCTTCTGTGCTGTTGTCTCTTATTTAAGTGCTGTTATCAATGTCTTTTGTAAATATTTAATATGTCT
ENSMUSG00000020914	Top2a	511	25	16	100	TGCCAAGACCTTCTGTGCTGTTGTCTCTTATTTAAGTGCTGTTATCAATGTCTTTTGTAAATATTTAATATGTCTGTCTGTTCCGCTAATTCCAACTATT
ENSMUSG00000020914	Top2a	511	25	17	100	TCTTATTTAAGTGCTGTTATCAATGTCTTTTGTAAATATTTAATATGTCTGTCTGTTCCGCTAATTCCAACTATTTTGTACTTTAATAAATCTTCTAAAC
ENSMUSG00000020914	Top2a	511	25	18	86	TCTTTTGTAAATATTTAATATGTCTGTCTGTTCCGCTAATTCCAACTATTTTGTACTTTAATAAATCTTCTAAACAATGCAAGCCA
ENSMUSG00000021215	Net1	2052	25	1	100	AGTGTGTATTCCCTGATGGGGAGCTGTTTATTTATAAATGTGTACAGTTTTTCTTATAATGGGAGCATCAAGGGTTACTCTGTACCAGAAGTAATGTGTT
ENSMUSG00000021215	Net1	2052	25	2	100	GTTTATTTATAAATGTGTACAGTTTTTCTTATAATGGGAGCATCAAGGGTTACTCTGTACCAGAAGTAATGTGTTCATGGTTTGGGTCTCTCTCTCATCC
ENSMUSG00000021215	Net1	2052	25	3	100	TTCTTATAATGGGAGCATCAAGGGTTACTCTGTACCAGAAGTAATGTGTTCATGGTTTGGGTCTCTCTCTCATCCTCTCCCTCTCCCTTCCCCCCGCCCC
ENSMUSG00000021215	Net1	2052	25	4	100	TACTCTGTACCAGAAGTAATGTGTTCATGGTTTGGGTCTCTCTCTCATCCTCTCCCTCTCCCTTCCCCCCGCCCCCAATCGTCGTCATGTCATTGATGTT
ENSMUSG00000021215	Net1	2052	25	5	100	CATGGTTTGGGTCTCTCTCTCATCCTCTCCCTCTCCCTTCCCCCCGCCCCCAATCGTCGTCATGTCATTGATGTTGTCCTTGTCGTCCTCGTTGTCATCG
ENSMUSG00000021215	Net1	2052	25	6	100	TCTCCCTCTCCCTTCCCCCCGCCCCCAATCGTCGTCATGTCATTGATGTTGTCCTTGTCGTCCTCGTTGTCATCGTCATCGTTGTTATTAATGGCAGCTA
ENSMUSG00000021215	Net1	2052	25	7	100	CAATCGTCGTCATGTCATTGATGTTGTCCTTGTCGTCCTCGTTGTCATCGTCATCGTTGTTATTAATGGCAGCTACAGATACACAGATTACTGTTAAATT
ENSMUSG00000021215	Net1	2052	25	8	100	GTCCTTGTCGTCCTCGTTGTCATCGTCATCGTTGTTATTAATGGCAGCTACAGATACACAGATTACTGTTAAATTGGAGACTTTAAAAAGGTATTTTCAT
ENSMUSG00000021215	Net1	2052	25	9	100	TCATCGTTGTTATTAATGGCAGCTACAGATACACAGATTACTGTTAAATTGGAGACTTTAAAAAGGTATTTTCATGGATTATTTGGAACATGCCAACTTG
ENSMUSG00000021215	Net1	2052	25	10	100	CAGATACACAGATTACTGTTAAATTGGAGACTTTAAAAAGGTATTTTCATGGATTATTTGGAACATGCCAACTTGGTGTATTTTATCAGAAGCAGTGTGT
ENSMUSG00000021215	Net1	2052	25	11	100	GGAGACTTTAAAAAGGTATTTTCATGGATTATTTGGAACATGCCAACTTGGTGTATTTTATCAGAAGCAGTGTGTGTGGAGCCGGTGCTGTCCTCACCTG
ENSMUSG00000021215	Net1	2052	25	12	100	GGATTATTTGGAACATGCCAACTTGGTGTATTTTATCAGAAGCAGTGTGTGTGGAGCCGGTGCTGTCCTCACCTGGTTCCCCATGACTGAGCAAATGTCA
ENSMUSG00000021215	Net1	2052	25	13	100	GTGTATTTTATCAGAAGCAGTGTGTGTGGAGCCGGTGCTGTCCTCACCTGGTTCCCCATGACTGAGCAAATGTCACAGTGTTTGCCAGGCTTAAACGCTT
ENSMUSG00000021215	Net1	2052	25	14	100	GTGGAGCCGGTGCTGTCCTCACCTGGTTCCCCATGACTGAGCAAATGTCACAGTGTTTGCCAGGCTTAAACGCTTGCAAATGCTGAGACTCCATCAGTGT
ENSMUSG00000021215	Net1	2052	25	15	100	GTTCCCCATGACTGAGCAAATGTCACAGTGTTTGCCAGGCTTAAACGCTTGCAAATGCTGAGACTCCATCAGTGTTCTCTGTGAAACCTCAGAGGGAGCA
ENSMUSG00000021215	Net1	2052	25	16	100	CAGTGTTTGCCAGGCTTAAACGCTTGCAAATGCTGAGACTCCATCAGTGTTCTCTGTGAAACCTCAGAGGGAGCATGGAATTGTAATAGTGACACCTACG
ENSMUSG00000021215	Net1	2052	25	17	100	GCAAATGCTGAGACTCCATCAGTGTTCTCTGTGAAACCTCAGAGGGAGCATGGAATTGTAATAGTGACACCTACGATCCGCATGGAACAGATTTGAGATT
ENSMUSG00000021215	Net1	2052	25	18	100	TCTCTGTGAAACCTCAGAGGGAGCATGGAATTGTAATAGTGACACCTACGATCCGCATGGAACAGATTTGAGATTGAAATCTTTTGTATTGACAGTGAAG
ENSMUSG00000021215	Net1	2052	25	19	100	TGGAATTGTAATAGTGACACCTACGATCCGCATGGAACAGATTTGAGATTGAAATCTTTTGTATTGACAGTGAAGTCCCGCTTCCTTGAGAACAAGCGTG
ENSMUSG00000021215	Net1	2052	25	20	100	ATCCGCATGGAACAGATTTGAGATTGAAATCTTTTGTATTGACAGTGAAGTCCCGCTTCCTTGAGAACAAGCGTGAAGCTGGATGTCTTCCCCCTTTGTC
ENSMUSG00000021215	Net1	2052	25	21	100	GAAATCTTTTGTATTGACAGTGAAGTCCCGCTTCCTTGAGAACAAGCGTGAAGCTGGATGTCTTCCCCCTTTGTCTCAACTGGAATGAACAAACACCCGT
ENSMUSG00000021215	Net1	2052	25	22	100	TCCCGCTTCCTTGAGAACAAGCGTGAAGCTGGATGTCTTCCCCCTTTGTCTCAACTGGAATGAACAAACACCCGTGGCAGTCTCACTGCACGGTTCGCCT
ENSMUSG00000021215	Net1	2052	25	23	100	AAGCTGGATGTCTTCCCCCTTTGTCTCAACTGGAATGAACAAACACCCGTGGCAGTCTCACTGCACGGTTCGCCTTCTGCATTCATTTATTCTGCCAACT
ENSMUSG00000021215	Net1	2052	25	24	100	TCAACTGGAATGAACAAACACCCGTGGCAGTCTCACTGCACGGTTCGCCTTCTGCATTCATTTATTCTGCCAACTATTTAATTTTTTTTTTATTGTAAAG
ENSMUSG00000021215	Net1	2052	25	25	100	GGCAGTCTCACTGCACGGTTCGCCTTCTGCATTCATTTATTCTGCCAACTATTTAATTTTTTTTTTATTGTAAAGTAGTTTTTAGTATTTGCTTTTATTT
ENSMUSG00000021215	Net1	2052	25	26	100	TCTGCATTCATTTATTCTGCCAACTATTTAATTTTTTTTTTATTGTAAAGTAGTTTTTAGTATTTGCTTTTATTTTTTTACATTGATGCCTTTTTAAAGT
ENSMUSG00000021215	Net1	2052	25	27	100	ATTTAATTTTTTTTTTATTGTAAAGTAGTTTTTAGTATTTGCTTTTATTTTTTTACATTGATGCCTTTTTAAAGTGGCATGTCCTTGAAGTTTTTCCTCC
ENSMUSG00000021215	Net1	2052	25	28	100	TAGTTTTTAGTATTTGCTTTTATTTTTTTACATTGATGCCTTTTTAAAGTGGCATGTCCTTGAAGTTTTTCCTCCTAATTGTGTGTGTGTGTGTGTGTGT
ENSMUSG00000021215	Net1	2052	25	29	100	TTTTACATTGATGCCTTTTTAAAGTGGCATGTCCTTGAAGTTTTTCCTCCTAATTGTGTGTGTGTGTGTGTGTGTGTGTGTGTGTGTGTGTGTGTTTGTG
ENSMUSG00000021215	Net1	2052	25	30	100	GGCATGTCCTTGAAGTTTTTCCTCCTAATTGTGTGTGTGTGTGTGTGTGTGTGTGTGTGTGTGTGTGTGTTTGTGTGTGAATCATTAATTTTATCAAGTG
ENSMUSG00000021215	Net1	2052	25	31	100	TAATTGTGTGTGTGTGTGTGTGTGTGTGTGTGTGTGTGTGTGTGTTTGTGTGTGAATCATTAATTTTATCAAGTGAAACCAAGCCATATTGTTTGAGCCA
ENSMUSG00000021215	Net1	2052	25	32	100	GTGTGTGTGTGTGTGTGTGTTTGTGTGTGAATCATTAATTTTATCAAGTGAAACCAAGCCATATTGTTTGAGCCAATTAAGAAAAGTGCAGTTTTTACAG
ENSMUSG00000021215	Net1	2052	25	33	100	TGTGAATCATTAATTTTATCAAGTGAAACCAAGCCATATTGTTTGAGCCAATTAAGAAAAGTGCAGTTTTTACAGTGTATCATGTGTGGTAAAGTCCCAT
ENSMUSG00000021215	Net1	2052	25	34	100	AAACCAAGCCATATTGTTTGAGCCAATTAAGAAAAGTGCAGTTTTTACAGTGTATCATGTGTGGTAAAGTCCCATGAAATGACTTAGTGTATTTTAGACT
ENSMUSG00000021215	Net1	2052	25	35	100	ATTAAGAAAAGTGCAGTTTTTACAGTGTATCATGTGTGGTAAAGTCCCATGAAATGACTTAGTGTATTTTAGACTACTGAAAGGAACCACAGGAAGGGTT
ENSMUSG00000021215	Net1	2052	25	36	100	TGTATCATGTGTGGTAAAGTCCCATGAAATGACTTAGTGTATTTTAGACTACTGAAAGGAACCACAGGAAGGGTTGGGTGGAAGTTTTTGTGTTGTCTGA
ENSMUSG00000021215	Net1	2052	25	37	100	GAAATGACTTAGTGTATTTTAGACTACTGAAAGGAACCACAGGAAGGGTTGGGTGGAAGTTTTTGTGTTGTCTGAAAAGCAAGAGAGAAGGCAGGAGTCT
ENSMUSG00000021215	Net1	2052	25	38	100	ACTGAAAGGAACCACAGGAAGGGTTGGGTGGAAGTTTTTGTGTTGTCTGAAAAGCAAGAGAGAAGGCAGGAGTCTGGGATAGGGAAGGGAAGGGAAGAGA
ENSMUSG00000021215	Net1	2052	25	39	100	GGGTGGAAGTTTTTGTGTTGTCTGAAAAGCAAGAGAGAAGGCAGGAGTCTGGGATAGGGAAGGGAAGGGAAGAGAAGAGAAGAGTAGCTTGTCTAAAGTA
ENSMUSG00000021215	Net1	2052	25	40	100	AAAGCAAGAGAGAAGGCAGGAGTCTGGGATAGGGAAGGGAAGGGAAGAGAAGAGAAGAGTAGCTTGTCTAAAGTAAATTGTCTGGCTGAACCAGAGGAGG
ENSMUSG00000021215	Net1	2052	25	41	100	GGGATAGGGAAGGGAAGGGAAGAGAAGAGAAGAGTAGCTTGTCTAAAGTAAATTGTCTGGCTGAACCAGAGGAGGAGCCAGGAGCAGCCTGGCCTGAGGG
ENSMUSG00000021215	Net1	2052	25	42	100	AGAGAAGAGTAGCTTGTCTAAAGTAAATTGTCTGGCTGAACCAGAGGAGGAGCCAGGAGCAGCCTGGCCTGAGGGATGTAGAAAGTTGTAGAAGGCAGAG
ENSMUSG00000021215	Net1	2052	25	43	100	AATTGTCTGGCTGAACCAGAGGAGGAGCCAGGAGCAGCCTGGCCTGAGGGATGTAGAAAGTTGTAGAAGGCAGAGGGGATGTGAACTGTGTTTGCTTTGG
ENSMUSG00000021215	Net1	2052	25	44	100	AGCCAGGAGCAGCCTGGCCTGAGGGATGTAGAAAGTTGTAGAAGGCAGAGGGGATGTGAACTGTGTTTGCTTTGGTTTCTCATACCTGCAAATGCTACAT
ENSMUSG00000021215	Net1	2052	25	45	100	ATGTAGAAAGTTGTAGAAGGCAGAGGGGATGTGAACTGTGTTTGCTTTGGTTTCTCATACCTGCAAATGCTACATTTGAAAAGAACTGTACAGTGTGTTG
ENSMUSG00000021215	Net1	2052	25	46	100	GGGATGTGAACTGTGTTTGCTTTGGTTTCTCATACCTGCAAATGCTACATTTGAAAAGAACTGTACAGTGTGTTGGAAATTTGACTATATTAGGTTAATT
ENSMUSG00000021215	Net1	2052	25	47	100	TTTCTCATACCTGCAAATGCTACATTTGAAAAGAACTGTACAGTGTGTTGGAAATTTGACTATATTAGGTTAATTCTGGTTGGTTTTCTTCATTTAAAAA
ENSMUSG00000021215	Net1	2052	25	48	100	TTGAAAAGAACTGTACAGTGTGTTGGAAATTTGACTATATTAGGTTAATTCTGGTTGGTTTTCTTCATTTAAAAAAAAACCCGTGATTCTTGACTACAAA
ENSMUSG00000021215	Net1	2052	25	49	100	GAAATTTGACTATATTAGGTTAATTCTGGTTGGTTTTCTTCATTTAAAAAAAAACCCGTGATTCTTGACTACAAAATGTTTGTGTTAAAAATGGGGTCAT
ENSMUSG00000021215	Net1	2052	25	50	100	CTGGTTGGTTTTCTTCATTTAAAAAAAAACCCGTGATTCTTGACTACAAAATGTTTGTGTTAAAAATGGGGTCATGCTCTTTACAGGGGGGAGAAGGACA
ENSMUSG00000021215	Net1	2052	25	51	100	AAAACCCGTGATTCTTGACTACAAAATGTTTGTGTTAAAAATGGGGTCATGCTCTTTACAGGGGGGAGAAGGACAGAGACCCCATGTCAGCCCAGGGTTA
ENSMUSG00000021215	Net1	2052	25	52	100	ATGTTTGTGTTAAAAATGGGGTCATGCTCTTTACAGGGGGGAGAAGGACAGAGACCCCATGTCAGCCCAGGGTTATACTGGCAATCAGTTCAAGTCATTG
ENSMUSG00000021215	Net1	2052	25	53	100	GCTCTTTACAGGGGGGAGAAGGACAGAGACCCCATGTCAGCCCAGGGTTATACTGGCAATCAGTTCAAGTCATTGTTAACCATTATATGTGAAATATATC
ENSMUSG00000021215	Net1	2052	25	54	100	GAGACCCCATGTCAGCCCAGGGTTATACTGGCAATCAGTTCAAGTCATTGTTAACCATTATATGTGAAATATATCTCCAGTGGAAATGAAAATTGGAAAA
ENSMUSG00000021215	Net1	2052	25	55	100	TACTGGCAATCAGTTCAAGTCATTGTTAACCATTATATGTGAAATATATCTCCAGTGGAAATGAAAATTGGAAAAGGCTGTAAATAGATCAATGAAATGA
ENSMUSG00000021215	Net1	2052	25	56	100	TTAACCATTATATGTGAAATATATCTCCAGTGGAAATGAAAATTGGAAAAGGCTGTAAATAGATCAATGAAATGATTTCTTTGTATAAAAGAATTATATA
ENSMUSG00000021215	Net1	2052	25	57	100	TCCAGTGGAAATGAAAATTGGAAAAGGCTGTAAATAGATCAATGAAATGATTTCTTTGTATAAAAGAATTATATAATTAAAAAAAAAGCACACACATAAT
ENSMUSG00000021215	Net1	2052	25	58	100	GGCTGTAAATAGATCAATGAAATGATTTCTTTGTATAAAAGAATTATATAATTAAAAAAAAAGCACACACATAATAACCCAAAACATTTCTCTCCTGGTG
ENSMUSG00000021215	Net1	2052	25	59	100	TTTCTTTGTATAAAAGAATTATATAATTAAAAAAAAAGCACACACATAATAACCCAAAACATTTCTCTCCTGGTGGTTATTTGGGGGGCCATCCACTGGG
ENSMUSG00000021215	Net1	2052	25	60	100	ATTAAAAAAAAAGCACACACATAATAACCCAAAACATTTCTCTCCTGGTGGTTATTTGGGGGGCCATCCACTGGGCCATGAGGGCTTAGCTAAACCTTTA
ENSMUSG00000021215	Net1	2052	25	61	100	AACCCAAAACATTTCTCTCCTGGTGGTTATTTGGGGGGCCATCCACTGGGCCATGAGGGCTTAGCTAAACCTTTAATGGTTAAGGAAATCCCAAATAATT
ENSMUSG00000021215	Net1	2052	25	62	100	GTTATTTGGGGGGCCATCCACTGGGCCATGAGGGCTTAGCTAAACCTTTAATGGTTAAGGAAATCCCAAATAATTTACCCTTTTGAAATTTGTTGATAAG
ENSMUSG00000021215	Net1	2052	25	63	100	CCATGAGGGCTTAGCTAAACCTTTAATGGTTAAGGAAATCCCAAATAATTTACCCTTTTGAAATTTGTTGATAAGAAAAGTCCATAGTTTAGTTCTTAGG
ENSMUSG00000021215	Net1	2052	25	64	100	ATGGTTAAGGAAATCCCAAATAATTTACCCTTTTGAAATTTGTTGATAAGAAAAGTCCATAGTTTAGTTCTTAGGAGTCATGTGATCTTTTAAGGACATG
ENSMUSG00000021215	Net1	2052	25	65	100	TACCCTTTTGAAATTTGTTGATAAGAAAAGTCCATAGTTTAGTTCTTAGGAGTCATGTGATCTTTTAAGGACATGATGTCATCTGAAGTCACCATTGTAT
ENSMUSG00000021215	Net1	2052	25	66	100	AAAAGTCCATAGTTTAGTTCTTAGGAGTCATGTGATCTTTTAAGGACATGATGTCATCTGAAGTCACCATTGTATTGCAGACAGCTGACCATGCTCATCT
ENSMUSG00000021215	Net1	2052	25	67	100	AGTCATGTGATCTTTTAAGGACATGATGTCATCTGAAGTCACCATTGTATTGCAGACAGCTGACCATGCTCATCTTCTGGATACAGTAGTAGAGCAAATA
ENSMUSG00000021215	Net1	2052	25	68	100	ATGTCATCTGAAGTCACCATTGTATTGCAGACAGCTGACCATGCTCATCTTCTGGATACAGTAGTAGAGCAAATAGCAAACATCTTCATTAATGTGGTTA
ENSMUSG00000021215	Net1	2052	25	69	100	TGCAGACAGCTGACCATGCTCATCTTCTGGATACAGTAGTAGAGCAAATAGCAAACATCTTCATTAATGTGGTTAAATCCAAAGTCTGAGGTAGGTACCT
ENSMUSG00000021215	Net1	2052	25	70	100	TCTGGATACAGTAGTAGAGCAAATAGCAAACATCTTCATTAATGTGGTTAAATCCAAAGTCTGAGGTAGGTACCTGAGCCTTGTTATTTTGGAAATTCAA
ENSMUSG00000021215	Net1	2052	25	71	100	GCAAACATCTTCATTAATGTGGTTAAATCCAAAGTCTGAGGTAGGTACCTGAGCCTTGTTATTTTGGAAATTCAAATTCAGAAGGGCGCCTTATCCAGTG
ENSMUSG00000021215	Net1	2052	25	72	100	AATCCAAAGTCTGAGGTAGGTACCTGAGCCTTGTTATTTTGGAAATTCAAATTCAGAAGGGCGCCTTATCCAGTGCTGTGATCTGCAGCTTAGGAAAGCA
ENSMUSG00000021215	Net1	2052	25	73	100	GAGCCTTGTTATTTTGGAAATTCAAATTCAGAAGGGCGCCTTATCCAGTGCTGTGATCTGCAGCTTAGGAAAGCAAGACAGTGGTCTTGTCTAGGGCTGT
ENSMUSG00000021215	Net1	2052	25	74	100	ATTCAGAAGGGCGCCTTATCCAGTGCTGTGATCTGCAGCTTAGGAAAGCAAGACAGTGGTCTTGTCTAGGGCTGTCATGTGGAGTTTAATTTCTCTCAGA
ENSMUSG00000021215	Net1	2052	25	75	100	CTGTGATCTGCAGCTTAGGAAAGCAAGACAGTGGTCTTGTCTAGGGCTGTCATGTGGAGTTTAATTTCTCTCAGAGTGGCTCTGTTCAGCTTCTAGAGTT
ENSMUSG00000021215	Net1	2052	25	76	100	AGACAGTGGTCTTGTCTAGGGCTGTCATGTGGAGTTTAATTTCTCTCAGAGTGGCTCTGTTCAGCTTCTAGAGTTAATGGGAACAAATGGTTCAGATGTG
ENSMUSG00000021215	Net1	2052	25	77	100	CATGTGGAGTTTAATTTCTCTCAGAGTGGCTCTGTTCAGCTTCTAGAGTTAATGGGAACAAATGGTTCAGATGTGGTAATGGAATGATGTTTGATCTAAA
ENSMUSG00000021215	Net1	2052	25	78	100	GTGGCTCTGTTCAGCTTCTAGAGTTAATGGGAACAAATGGTTCAGATGTGGTAATGGAATGATGTTTGATCTAAAGGTATCTTGCTTGGTTTCTCTCGGG
ENSMUSG00000021215	Net1	2052	25	79	102	AATGGGAACAAATGGTTCAGATGTGGTAATGGAATGATGTTTGATCTAAAGGTATCTTGCTTGGTTTCTCTCGGGAGAAAATAAACAGTCATGACGTTCTTC
ENSMUSG00000022354	Ndufb9	82	15	1	75	AGGCAGGCCCCTCACTGTTCATGCTTGCAAGTGAGAGTTTCAGAGCACGCTCACACTTGCCCTAATAAAAGGAAC
ENSMUSG00000022354	Ndufb9	82	15	2	67	TGTTCATGCTTGCAAGTGAGAGTTTCAGAGCACGCTCACACTTGCCCTAATAAAAGGAACTAGACAC
ENSMUSG00000022594	Lynx1	3379	25	1	100	AGCTCGGTTCCCCAAGCCAGATCCACTCAAACGCAACACTCTCAAAAAACACAGTTTCCCTCTCTCTCCCAATTCACTCCACCCAACGCTCTTCCTTCTG
ENSMUSG00000022594	Lynx1	3379	25	2	100	CTCAAACGCAACACTCTCAAAAAACACAGTTTCCCTCTCTCTCCCAATTCACTCCACCCAACGCTCTTCCTTCTGACACTCCTCAACTACCACGAGGTCC
ENSMUSG00000022594	Lynx1	3379	25	3	100	ACAGTTTCCCTCTCTCTCCCAATTCACTCCACCCAACGCTCTTCCTTCTGACACTCCTCAACTACCACGAGGTCCCATGGCTACCTACGAAAGAACTGAT
ENSMUSG00000022594	Lynx1	3379	25	4	100	ACTCCACCCAACGCTCTTCCTTCTGACACTCCTCAACTACCACGAGGTCCCATGGCTACCTACGAAAGAACTGATGGCATCCAGATACCTCACTCCAAGG
ENSMUSG00000022594	Lynx1	3379	25	5	100	ACACTCCTCAACTACCACGAGGTCCCATGGCTACCTACGAAAGAACTGATGGCATCCAGATACCTCACTCCAAGGTCATTTTCAGAAGGCTGACATGTGG
ENSMUSG00000022594	Lynx1	3379	25	6	100	CATGGCTACCTACGAAAGAACTGATGGCATCCAGATACCTCACTCCAAGGTCATTTTCAGAAGGCTGACATGTGGACCTGTAATGTGCCCACCCATGGGT
ENSMUSG00000022594	Lynx1	3379	25	7	100	GGCATCCAGATACCTCACTCCAAGGTCATTTTCAGAAGGCTGACATGTGGACCTGTAATGTGCCCACCCATGGGTGGGGCAGGCTGGGCTTCTCCTCTAC
ENSMUSG00000022594	Lynx1	3379	25	8	100	TCATTTTCAGAAGGCTGACATGTGGACCTGTAATGTGCCCACCCATGGGTGGGGCAGGCTGGGCTTCTCCTCTACCCAAGATCAGGGGCATCTGGGAGAA
ENSMUSG00000022594	Lynx1	3379	25	9	100	ACCTGTAATGTGCCCACCCATGGGTGGGGCAGGCTGGGCTTCTCCTCTACCCAAGATCAGGGGCATCTGGGAGAATGTTTATGGAGGAGGGGTCATCACT
ENSMUSG00000022594	Lynx1	3379	25	10	100	GGGGCAGGCTGGGCTTCTCCTCTACCCAAGATCAGGGGCATCTGGGAGAATGTTTATGGAGGAGGGGTCATCACTCAAGTCAAGGAGCACTGATTTGATA
ENSMUSG00000022594	Lynx1	3379	25	11	100	CCAAGATCAGGGGCATCTGGGAGAATGTTTATGGAGGAGGGGTCATCACTCAAGTCAAGGAGCACTGATTTGATAGAATTAGTAGCCAAACTCCACCTTC
ENSMUSG00000022594	Lynx1	3379	25	12	100	TGTTTATGGAGGAGGGGTCATCACTCAAGTCAAGGAGCACTGATTTGATAGAATTAGTAGCCAAACTCCACCTTCAGAACCCTGCCTCAGTCTACCCAGT
ENSMUSG00000022594	Lynx1	3379	25	13	100	CAAGTCAAGGAGCACTGATTTGATAGAATTAGTAGCCAAACTCCACCTTCAGAACCCTGCCTCAGTCTACCCAGTAGAGGATGGGTCTGCTAGAGGTGAG
ENSMUSG00000022594	Lynx1	3379	25	14	100	GAATTAGTAGCCAAACTCCACCTTCAGAACCCTGCCTCAGTCTACCCAGTAGAGGATGGGTCTGCTAGAGGTGAGGGGAGGAGAGCGGCGGAGAATAACG
ENSMUSG00000022594	Lynx1	3379	25	15	100	AGAACCCTGCCTCAGTCTACCCAGTAGAGGATGGGTCTGCTAGAGGTGAGGGGAGGAGAGCGGCGGAGAATAACGAGCTGGCTAGAAGCAGAGAAAGACT
ENSMUSG00000022594	Lynx1	3379	25	16	100	AGAGGATGGGTCTGCTAGAGGTGAGGGGAGGAGAGCGGCGGAGAATAACGAGCTGGCTAGAAGCAGAGAAAGACTCAGCAGGGCTGTCTCCGAAGATCAG
ENSMUSG00000022594	Lynx1	3379	25	17	100	GGGAGGAGAGCGGCGGAGAATAACGAGCTGGCTAGAAGCAGAGAAAGACTCAGCAGGGCTGTCTCCGAAGATCAGCGCGGCTTGCCAGAGCAAATGTGAT
ENSMUSG00000022594	Lynx1	3379	25	18	100	AGCTGGCTAGAAGCAGAGAAAGACTCAGCAGGGCTGTCTCCGAAGATCAGCGCGGCTTGCCAGAGCAAATGTGATGTGGAAGCCATGTGAGGAAGCCCTT
ENSMUSG00000022594	Lynx1	3379	25	19	100	CAGCAGGGCTGTCTCCGAAGATCAGCGCGGCTTGCCAGAGCAAATGTGATGTGGAAGCCATGTGAGGAAGCCCTTTGTCATTTCCACTTATCTGAGGAAC
ENSMUSG00000022594	Lynx1	3379	25	20	100	CGCGGCTTGCCAGAGCAAATGTGATGTGGAAGCCATGTGAGGAAGCCCTTTGTCATTTCCACTTATCTGAGGAACTCTGCCAGACCTGATGTTGGGATAG
ENSMUSG00000022594	Lynx1	3379	25	21	100	GTGGAAGCCATGTGAGGAAGCCCTTTGTCATTTCCACTTATCTGAGGAACTCTGCCAGACCTGATGTTGGGATAGCCATTGGCCAAGGGTTCCTAGCAAC
ENSMUSG00000022594	Lynx1	3379	25	22	100	TGTCATTTCCACTTATCTGAGGAACTCTGCCAGACCTGATGTTGGGATAGCCATTGGCCAAGGGTTCCTAGCAACGGCGTCATTTCCATAGGCCACTGAA
ENSMUSG00000022594	Lynx1	3379	25	23	100	TCTGCCAGACCTGATGTTGGGATAGCCATTGGCCAAGGGTTCCTAGCAACGGCGTCATTTCCATAGGCCACTGAAATCCCTCCAGCCCCAGCTCAGCAGG
ENSMUSG00000022594	Lynx1	3379	25	24	100	CCATTGGCCAAGGGTTCCTAGCAACGGCGTCATTTCCATAGGCCACTGAAATCCCTCCAGCCCCAGCTCAGCAGGCCCCTTGACCTCCACTACAGTCCTT
ENSMUSG00000022594	Lynx1	3379	25	25	100	GGCGTCATTTCCATAGGCCACTGAAATCCCTCCAGCCCCAGCTCAGCAGGCCCCTTGACCTCCACTACAGTCCTTCATTCACACACCAGCTGCTGGGCCT
ENSMUSG00000022594	Lynx1	3379	25	26	100	ATCCCTCCAGCCCCAGCTCAGCAGGCCCCTTGACCTCCACTACAGTCCTTCATTCACACACCAGCTGCTGGGCCTTGAAGTTGGCAGGGACTTGGGAGCA
ENSMUSG00000022594	Lynx1	3379	25	27	100	CCCCTTGACCTCCACTACAGTCCTTCATTCACACACCAGCTGCTGGGCCTTGAAGTTGGCAGGGACTTGGGAGCAGGTGACCCATGCTATTTTTTGTCTG
ENSMUSG00000022594	Lynx1	3379	25	28	100	CATTCACACACCAGCTGCTGGGCCTTGAAGTTGGCAGGGACTTGGGAGCAGGTGACCCATGCTATTTTTTGTCTGGCCTGTTATTCTGGGCATGGCAAGA
ENSMUSG00000022594	Lynx1	3379	25	29	100	TGAAGTTGGCAGGGACTTGGGAGCAGGTGACCCATGCTATTTTTTGTCTGGCCTGTTATTCTGGGCATGGCAAGAAGGGATCAGACGCAGGTCAGAGCAG
ENSMUSG00000022594	Lynx1	3379	25	30	100	GGTGACCCATGCTATTTTTTGTCTGGCCTGTTATTCTGGGCATGGCAAGAAGGGATCAGACGCAGGTCAGAGCAGGGCAGTAGGGCGACTGAGACAGGGA
ENSMUSG00000022594	Lynx1	3379	25	31	100	GCCTGTTATTCTGGGCATGGCAAGAAGGGATCAGACGCAGGTCAGAGCAGGGCAGTAGGGCGACTGAGACAGGGAAACAGACTTCAGCCAGTGGCTTCCC
ENSMUSG00000022594	Lynx1	3379	25	32	100	AGGGATCAGACGCAGGTCAGAGCAGGGCAGTAGGGCGACTGAGACAGGGAAACAGACTTCAGCCAGTGGCTTCCCAGGTCCCGTAGGCAGCTCCTACATC
ENSMUSG00000022594	Lynx1	3379	25	33	100	GGCAGTAGGGCGACTGAGACAGGGAAACAGACTTCAGCCAGTGGCTTCCCAGGTCCCGTAGGCAGCTCCTACATCCTTCAGTCTCTTGTTACATTCCCGG
ENSMUSG00000022594	Lynx1	3379	25	34	100	AACAGACTTCAGCCAGTGGCTTCCCAGGTCCCGTAGGCAGCTCCTACATCCTTCAGTCTCTTGTTACATTCCCGGGAGACAAATATACAGGGAGCCAAGC
ENSMUSG00000022594	Lynx1	3379	25	35	100	AGGTCCCGTAGGCAGCTCCTACATCCTTCAGTCTCTTGTTACATTCCCGGGAGACAAATATACAGGGAGCCAAGCCGAGTGCTAGGTGATGACTGCCTGT
ENSMUSG00000022594	Lynx1	3379	25	36	100	CTTCAGTCTCTTGTTACATTCCCGGGAGACAAATATACAGGGAGCCAAGCCGAGTGCTAGGTGATGACTGCCTGTGAAGTCTATTGTGGCCACAGACTGC
ENSMUSG00000022594	Lynx1	3379	25	37	100	GAGACAAATATACAGGGAGCCAAGCCGAGTGCTAGGTGATGACTGCCTGTGAAGTCTATTGTGGCCACAGACTGCTGGGTACCAAGTCTCAGGAGAACCC
ENSMUSG00000022594	Lynx1	3379	25	38	100	CGAGTGCTAGGTGATGACTGCCTGTGAAGTCTATTGTGGCCACAGACTGCTGGGTACCAAGTCTCAGGAGAACCCAGCCTAGATTTAGGAGACACAGATC
ENSMUSG00000022594	Lynx1	3379	25	39	100	GAAGTCTATTGTGGCCACAGACTGCTGGGTACCAAGTCTCAGGAGAACCCAGCCTAGATTTAGGAGACACAGATCTGCCTTTCATGCAGTGTAGCTGTCC
ENSMUSG00000022594	Lynx1	3379	25	40	100	TGGGTACCAAGTCTCAGGAGAACCCAGCCTAGATTTAGGAGACACAGATCTGCCTTTCATGCAGTGTAGCTGTCCTTGGGAGCCTTACCATGCTCTCTAA
ENSMUSG00000022594	Lynx1	3379	25	41	100	AGCCTAGATTTAGGAGACACAGATCTGCCTTTCATGCAGTGTAGCTGTCCTTGGGAGCCTTACCATGCTCTCTAACTAGTACCTCAACTCACATGTCACT
ENSMUSG00000022594	Lynx1	3379	25	42	100	TGCCTTTCATGCAGTGTAGCTGTCCTTGGGAGCCTTACCATGCTCTCTAACTAGTACCTCAACTCACATGTCACTGAGGAACCCCCTAACACTGGCCCAG
ENSMUSG00000022594	Lynx1	3379	25	43	100	TTGGGAGCCTTACCATGCTCTCTAACTAGTACCTCAACTCACATGTCACTGAGGAACCCCCTAACACTGGCCCAGCCCAGGGGTCGGGATGCTGGCCAAT
ENSMUSG00000022594	Lynx1	3379	25	44	100	CTAGTACCTCAACTCACATGTCACTGAGGAACCCCCTAACACTGGCCCAGCCCAGGGGTCGGGATGCTGGCCAATGTCCATGGAGTGGGACTACCCATGG
ENSMUSG00000022594	Lynx1	3379	25	45	100	GAGGAACCCCCTAACACTGGCCCAGCCCAGGGGTCGGGATGCTGGCCAATGTCCATGGAGTGGGACTACCCATGGAGAGTCCTTGGGTCATCACATCACA
ENSMUSG00000022594	Lynx1	3379	25	46	100	CCCAGGGGTCGGGATGCTGGCCAATGTCCATGGAGTGGGACTACCCATGGAGAGTCCTTGGGTCATCACATCACAAATGTTTTATTCCAACCTCCCAGTG
ENSMUSG00000022594	Lynx1	3379	25	47	100	GTCCATGGAGTGGGACTACCCATGGAGAGTCCTTGGGTCATCACATCACAAATGTTTTATTCCAACCTCCCAGTGGTGAGAGCTCGGGACACAAAGGTCC
ENSMUSG00000022594	Lynx1	3379	25	48	100	AGAGTCCTTGGGTCATCACATCACAAATGTTTTATTCCAACCTCCCAGTGGTGAGAGCTCGGGACACAAAGGTCCATCCTGGGGACCTTCTTCCTGGTTC
ENSMUSG00000022594	Lynx1	3379	25	49	100	AATGTTTTATTCCAACCTCCCAGTGGTGAGAGCTCGGGACACAAAGGTCCATCCTGGGGACCTTCTTCCTGGTTCTAGGCAGACCTGAACTCTGTCTGCT
ENSMUSG00000022594	Lynx1	3379	25	50	100	GTGAGAGCTCGGGACACAAAGGTCCATCCTGGGGACCTTCTTCCTGGTTCTAGGCAGACCTGAACTCTGTCTGCTGCTAGAGCTGATGTGGTTTTCCGCC
ENSMUSG00000022594	Lynx1	3379	25	51	100	ATCCTGGGGACCTTCTTCCTGGTTCTAGGCAGACCTGAACTCTGTCTGCTGCTAGAGCTGATGTGGTTTTCCGCCTCAGTTTCCTCCTCCGGGGATAGGC
ENSMUSG00000022594	Lynx1	3379	25	52	100	TAGGCAGACCTGAACTCTGTCTGCTGCTAGAGCTGATGTGGTTTTCCGCCTCAGTTTCCTCCTCCGGGGATAGGCCACCGGAGGATTTGGGAGGGTGGGG
ENSMUSG00000022594	Lynx1	3379	25	53	100	GCTAGAGCTGATGTGGTTTTCCGCCTCAGTTTCCTCCTCCGGGGATAGGCCACCGGAGGATTTGGGAGGGTGGGGAGGGCATCCTGCTGATGGGCTCGCC
ENSMUSG00000022594	Lynx1	3379	25	54	100	TCAGTTTCCTCCTCCGGGGATAGGCCACCGGAGGATTTGGGAGGGTGGGGAGGGCATCCTGCTGATGGGCTCGCCGAGGTTCTCAGGAACAGGAACGGGC
ENSMUSG00000022594	Lynx1	3379	25	55	100	CACCGGAGGATTTGGGAGGGTGGGGAGGGCATCCTGCTGATGGGCTCGCCGAGGTTCTCAGGAACAGGAACGGGCGGGGCTTTAGTACACAGGTGAGTTG
ENSMUSG00000022594	Lynx1	3379	25	56	100	AGGGCATCCTGCTGATGGGCTCGCCGAGGTTCTCAGGAACAGGAACGGGCGGGGCTTTAGTACACAGGTGAGTTGGGTGGGAACTGGCCCGGAGCTGAGG
ENSMUSG00000022594	Lynx1	3379	25	57	100	GAGGTTCTCAGGAACAGGAACGGGCGGGGCTTTAGTACACAGGTGAGTTGGGTGGGAACTGGCCCGGAGCTGAGGAGACACTGACTGGGCAGAGGGAAGA
ENSMUSG00000022594	Lynx1	3379	25	58	100	GGGGCTTTAGTACACAGGTGAGTTGGGTGGGAACTGGCCCGGAGCTGAGGAGACACTGACTGGGCAGAGGGAAGATGAGTCTCAAGGGAGGGCAGGAAAA
ENSMUSG00000022594	Lynx1	3379	25	59	100	GGTGGGAACTGGCCCGGAGCTGAGGAGACACTGACTGGGCAGAGGGAAGATGAGTCTCAAGGGAGGGCAGGAAAAGGGAGGGGGAGCGCGCATGCACATG
ENSMUSG00000022594	Lynx1	3379	25	60	100	AGACACTGACTGGGCAGAGGGAAGATGAGTCTCAAGGGAGGGCAGGAAAAGGGAGGGGGAGCGCGCATGCACATGTGCACTCAGTGCAGGCTACAGAGCC
ENSMUSG00000022594	Lynx1	3379	25	61	100	TGAGTCTCAAGGGAGGGCAGGAAAAGGGAGGGGGAGCGCGCATGCACATGTGCACTCAGTGCAGGCTACAGAGCCCAAAAGGCAGCACTGGCTGTGGTGT
ENSMUSG00000022594	Lynx1	3379	25	62	100	GGGAGGGGGAGCGCGCATGCACATGTGCACTCAGTGCAGGCTACAGAGCCCAAAAGGCAGCACTGGCTGTGGTGTCCCCTGAGGCCCAGGCAAGATGCTA
ENSMUSG00000022594	Lynx1	3379	25	63	100	TGCACTCAGTGCAGGCTACAGAGCCCAAAAGGCAGCACTGGCTGTGGTGTCCCCTGAGGCCCAGGCAAGATGCTAGGAGGAAGCCAATGCTGCCCCCACC
ENSMUSG00000022594	Lynx1	3379	25	64	100	CAAAAGGCAGCACTGGCTGTGGTGTCCCCTGAGGCCCAGGCAAGATGCTAGGAGGAAGCCAATGCTGCCCCCACCTGAGCTCACATGGAACATGCACACC
ENSMUSG00000022594	Lynx1	3379	25	65	100	CCCCTGAGGCCCAGGCAAGATGCTAGGAGGAAGCCAATGCTGCCCCCACCTGAGCTCACATGGAACATGCACACCACCAGCAGCAGCAGCAAGCATTGAG
ENSMUSG00000022594	Lynx1	3379	25	66	100	GGAGGAAGCCAATGCTGCCCCCACCTGAGCTCACATGGAACATGCACACCACCAGCAGCAGCAGCAAGCATTGAGACTGACCTGTGGACGCCATAGGGCA
ENSMUSG00000022594	Lynx1	3379	25	67	100	TGAGCTCACATGGAACATGCACACCACCAGCAGCAGCAGCAAGCATTGAGACTGACCTGTGGACGCCATAGGGCACTGGCAAGGAGGGTCAGAGGCGGGT
ENSMUSG00000022594	Lynx1	3379	25	68	100	ACCAGCAGCAGCAGCAAGCATTGAGACTGACCTGTGGACGCCATAGGGCACTGGCAAGGAGGGTCAGAGGCGGGTCCCTGACTCAGTGGGTGAGGCCCGG
ENSMUSG00000022594	Lynx1	3379	25	69	100	ACTGACCTGTGGACGCCATAGGGCACTGGCAAGGAGGGTCAGAGGCGGGTCCCTGACTCAGTGGGTGAGGCCCGGGAAACATTATCCTGTTACCCTGCGT
ENSMUSG00000022594	Lynx1	3379	25	70	100	CTGGCAAGGAGGGTCAGAGGCGGGTCCCTGACTCAGTGGGTGAGGCCCGGGAAACATTATCCTGTTACCCTGCGTGTGCAAGATCATTGTCCCCAGCTAG
ENSMUSG00000022594	Lynx1	3379	25	71	100	CCCTGACTCAGTGGGTGAGGCCCGGGAAACATTATCCTGTTACCCTGCGTGTGCAAGATCATTGTCCCCAGCTAGATGGCGTCCTCAACCAAAACTGAGA
ENSMUSG00000022594	Lynx1	3379	25	72	100	GAAACATTATCCTGTTACCCTGCGTGTGCAAGATCATTGTCCCCAGCTAGATGGCGTCCTCAACCAAAACTGAGAGGAGCCCCAGTTCAGGTCCTCCCTC
ENSMUSG00000022594	Lynx1	3379	25	73	100	GTGCAAGATCATTGTCCCCAGCTAGATGGCGTCCTCAACCAAAACTGAGAGGAGCCCCAGTTCAGGTCCTCCCTCCTACCACAAGGGGGTGGTGTGGAGG
ENSMUSG00000022594	Lynx1	3379	25	74	100	ATGGCGTCCTCAACCAAAACTGAGAGGAGCCCCAGTTCAGGTCCTCCCTCCTACCACAAGGGGGTGGTGTGGAGGAGGCTTGATTGCCCTTGGAGAAGCA
ENSMUSG00000022594	Lynx1	3379	25	75	100	GGAGCCCCAGTTCAGGTCCTCCCTCCTACCACAAGGGGGTGGTGTGGAGGAGGCTTGATTGCCCTTGGAGAAGCACCGGTACTGCAGAGCTGGGGGCCAG
ENSMUSG00000022594	Lynx1	3379	25	76	100	CTACCACAAGGGGGTGGTGTGGAGGAGGCTTGATTGCCCTTGGAGAAGCACCGGTACTGCAGAGCTGGGGGCCAGCTTCTTTCATCTGTGTCTAGACACC
ENSMUSG00000022594	Lynx1	3379	25	77	100	AGGCTTGATTGCCCTTGGAGAAGCACCGGTACTGCAGAGCTGGGGGCCAGCTTCTTTCATCTGTGTCTAGACACCGACCAGATAGGCCCCACAGTGGCAA
ENSMUSG00000022594	Lynx1	3379	25	78	100	CCGGTACTGCAGAGCTGGGGGCCAGCTTCTTTCATCTGTGTCTAGACACCGACCAGATAGGCCCCACAGTGGCAACACTGCCACACAGCCCTACAAGAAG
ENSMUSG00000022594	Lynx1	3379	25	79	100	CTTCTTTCATCTGTGTCTAGACACCGACCAGATAGGCCCCACAGTGGCAACACTGCCACACAGCCCTACAAGAAGCCCTGTGCCTAGCTAGCACAGAGCC
ENSMUSG00000022594	Lynx1	3379	25	80	100	GACCAGATAGGCCCCACAGTGGCAACACTGCCACACAGCCCTACAAGAAGCCCTGTGCCTAGCTAGCACAGAGCCCCAAAAGGTGCTCAATTAATACAGG
ENSMUSG00000022594	Lynx1	3379	25	81	100	CACTGCCACACAGCCCTACAAGAAGCCCTGTGCCTAGCTAGCACAGAGCCCCAAAAGGTGCTCAATTAATACAGGGCCAAGCCTGCCAGTGGGGGGGATG
ENSMUSG00000022594	Lynx1	3379	25	82	100	CCCTGTGCCTAGCTAGCACAGAGCCCCAAAAGGTGCTCAATTAATACAGGGCCAAGCCTGCCAGTGGGGGGGATGCAGATTAGGGGAACAGACCCAGATG
ENSMUSG00000022594	Lynx1	3379	25	83	100	CCAAAAGGTGCTCAATTAATACAGGGCCAAGCCTGCCAGTGGGGGGGATGCAGATTAGGGGAACAGACCCAGATGGCCTGTCCTGAACCCTGTCTGGGGT
ENSMUSG00000022594	Lynx1	3379	25	84	100	GCCAAGCCTGCCAGTGGGGGGGATGCAGATTAGGGGAACAGACCCAGATGGCCTGTCCTGAACCCTGTCTGGGGTGGTGTGATGAGCATCTGTCTAGCCC
ENSMUSG00000022594	Lynx1	3379	25	85	100	CAGATTAGGGGAACAGACCCAGATGGCCTGTCCTGAACCCTGTCTGGGGTGGTGTGATGAGCATCTGTCTAGCCCACTGCAGGTGGCTCTACACACTCCA
ENSMUSG00000022594	Lynx1	3379	25	86	100	GCCTGTCCTGAACCCTGTCTGGGGTGGTGTGATGAGCATCTGTCTAGCCCACTGCAGGTGGCTCTACACACTCCACAACAGTTCTGCAAAAGTGTATGAG
ENSMUSG00000022594	Lynx1	3379	25	87	100	GGTGTGATGAGCATCTGTCTAGCCCACTGCAGGTGGCTCTACACACTCCACAACAGTTCTGCAAAAGTGTATGAGGTGGTCATTACTGCGCCCCTCTCAC
ENSMUSG00000022594	Lynx1	3379	25	88	100	ACTGCAGGTGGCTCTACACACTCCACAACAGTTCTGCAAAAGTGTATGAGGTGGTCATTACTGCGCCCCTCTCACAGGTAAAGGCACTGAGGCACGGAGG
ENSMUSG00000022594	Lynx1	3379	25	89	100	CAACAGTTCTGCAAAAGTGTATGAGGTGGTCATTACTGCGCCCCTCTCACAGGTAAAGGCACTGAGGCACGGAGGAGTGAGGCACTTCATTTTCCTGGGC
ENSMUSG00000022594	Lynx1	3379	25	90	100	GTGGTCATTACTGCGCCCCTCTCACAGGTAAAGGCACTGAGGCACGGAGGAGTGAGGCACTTCATTTTCCTGGGCCATTCAACTTTCCAGGACCAACACA
ENSMUSG00000022594	Lynx1	3379	25	91	100	AGGTAAAGGCACTGAGGCACGGAGGAGTGAGGCACTTCATTTTCCTGGGCCATTCAACTTTCCAGGACCAACACATTCAACTATGGGTACTACTCCAATA
ENSMUSG00000022594	Lynx1	3379	25	92	100	AGTGAGGCACTTCATTTTCCTGGGCCATTCAACTTTCCAGGACCAACACATTCAACTATGGGTACTACTCCAATAGCTGGGGTTCTTTGAGGCTGGGCCC
ENSMUSG00000022594	Lynx1	3379	25	93	100	CATTCAACTTTCCAGGACCAACACATTCAACTATGGGTACTACTCCAATAGCTGGGGTTCTTTGAGGCTGGGCCCCCTGAAGATGATAGTGGCTTCATCA
ENSMUSG00000022594	Lynx1	3379	25	94	100	TTCAACTATGGGTACTACTCCAATAGCTGGGGTTCTTTGAGGCTGGGCCCCCTGAAGATGATAGTGGCTTCATCAACCAGAGAATTTCAGAGTGCAGTGT
ENSMUSG00000022594	Lynx1	3379	25	95	100	GCTGGGGTTCTTTGAGGCTGGGCCCCCTGAAGATGATAGTGGCTTCATCAACCAGAGAATTTCAGAGTGCAGTGTTGTAGGAGCCTATGAACCTGAAATG
ENSMUSG00000022594	Lynx1	3379	25	96	100	CCTGAAGATGATAGTGGCTTCATCAACCAGAGAATTTCAGAGTGCAGTGTTGTAGGAGCCTATGAACCTGAAATGTCAGAACTGGAGGTTTGAGGGGCTG
ENSMUSG00000022594	Lynx1	3379	25	97	100	ACCAGAGAATTTCAGAGTGCAGTGTTGTAGGAGCCTATGAACCTGAAATGTCAGAACTGGAGGTTTGAGGGGCTGAGGGGTAGGCCAGGGGTGTCTGGCC
ENSMUSG00000022594	Lynx1	3379	25	98	100	TGTAGGAGCCTATGAACCTGAAATGTCAGAACTGGAGGTTTGAGGGGCTGAGGGGTAGGCCAGGGGTGTCTGGCCCCTTGTGTGGAGACAGAGAGAGAGG
ENSMUSG00000022594	Lynx1	3379	25	99	100	TCAGAACTGGAGGTTTGAGGGGCTGAGGGGTAGGCCAGGGGTGTCTGGCCCCTTGTGTGGAGACAGAGAGAGAGGGAACATGGGATGGGGTAGTAGAGAG
ENSMUSG00000022594	Lynx1	3379	25	100	100	AGGGGTAGGCCAGGGGTGTCTGGCCCCTTGTGTGGAGACAGAGAGAGAGGGAACATGGGATGGGGTAGTAGAGAGAAGTGCAAAGGAGCGTCAGCCTTTC
ENSMUSG00000022594	Lynx1	3379	25	101	100	CCTTGTGTGGAGACAGAGAGAGAGGGAACATGGGATGGGGTAGTAGAGAGAAGTGCAAAGGAGCGTCAGCCTTTCTCAGGGCTAATGCTGTCAGGGACGA
ENSMUSG00000022594	Lynx1	3379	25	102	100	GAACATGGGATGGGGTAGTAGAGAGAAGTGCAAAGGAGCGTCAGCCTTTCTCAGGGCTAATGCTGTCAGGGACGAGGGCTCAAGCCTGTGAGTGTTCTCA
ENSMUSG00000022594	Lynx1	3379	25	103	100	AAGTGCAAAGGAGCGTCAGCCTTTCTCAGGGCTAATGCTGTCAGGGACGAGGGCTCAAGCCTGTGAGTGTTCTCACACTGTGATAAACAGTGGCCCCTCA
ENSMUSG00000022594	Lynx1	3379	25	104	100	TCAGGGCTAATGCTGTCAGGGACGAGGGCTCAAGCCTGTGAGTGTTCTCACACTGTGATAAACAGTGGCCCCTCAACACAGACGGTGTCCAGAGTGGCCG
ENSMUSG00000022594	Lynx1	3379	25	105	100	GGGCTCAAGCCTGTGAGTGTTCTCACACTGTGATAAACAGTGGCCCCTCAACACAGACGGTGTCCAGAGTGGCCGGCAGTGGTTATCTAGAGTTGCAATC
ENSMUSG00000022594	Lynx1	3379	25	106	100	CACTGTGATAAACAGTGGCCCCTCAACACAGACGGTGTCCAGAGTGGCCGGCAGTGGTTATCTAGAGTTGCAATCTGGAAGCCTCTTGGTAGTCACTGGA
ENSMUSG00000022594	Lynx1	3379	25	107	100	ACACAGACGGTGTCCAGAGTGGCCGGCAGTGGTTATCTAGAGTTGCAATCTGGAAGCCTCTTGGTAGTCACTGGAGAGAGGCCGCTTGATGGGACAGCAC
ENSMUSG00000022594	Lynx1	3379	25	108	100	GCAGTGGTTATCTAGAGTTGCAATCTGGAAGCCTCTTGGTAGTCACTGGAGAGAGGCCGCTTGATGGGACAGCACCAAATGTGTGTGCTTCTGTGGGATG
ENSMUSG00000022594	Lynx1	3379	25	109	100	TGGAAGCCTCTTGGTAGTCACTGGAGAGAGGCCGCTTGATGGGACAGCACCAAATGTGTGTGCTTCTGTGGGATGTGAGGAAGCTGGGTCAGCGCATGAA
ENSMUSG00000022594	Lynx1	3379	25	110	100	GAGAGGCCGCTTGATGGGACAGCACCAAATGTGTGTGCTTCTGTGGGATGTGAGGAAGCTGGGTCAGCGCATGAAGCCAAAGCGTCCTTCAGAGCAGAGG
ENSMUSG00000022594	Lynx1	3379	25	111	100	CAAATGTGTGTGCTTCTGTGGGATGTGAGGAAGCTGGGTCAGCGCATGAAGCCAAAGCGTCCTTCAGAGCAGAGGGGTGGCTGGTCTAGTCCACCAGAGA
ENSMUSG00000022594	Lynx1	3379	25	112	100	TGAGGAAGCTGGGTCAGCGCATGAAGCCAAAGCGTCCTTCAGAGCAGAGGGGTGGCTGGTCTAGTCCACCAGAGACAAGCTATCCAGTGAGAGTCATACT
ENSMUSG00000022594	Lynx1	3379	25	113	100	GCCAAAGCGTCCTTCAGAGCAGAGGGGTGGCTGGTCTAGTCCACCAGAGACAAGCTATCCAGTGAGAGTCATACTCTGCCACCGTCTCTGTGATTACCTT
ENSMUSG00000022594	Lynx1	3379	25	114	100	GGTGGCTGGTCTAGTCCACCAGAGACAAGCTATCCAGTGAGAGTCATACTCTGCCACCGTCTCTGTGATTACCTTACCCCAAAGCAGACGGGGACGGGAT
ENSMUSG00000022594	Lynx1	3379	25	115	100	CAAGCTATCCAGTGAGAGTCATACTCTGCCACCGTCTCTGTGATTACCTTACCCCAAAGCAGACGGGGACGGGATGCAGAGCACCCGTGTCTTCATCTTC
ENSMUSG00000022594	Lynx1	3379	25	116	100	CTGCCACCGTCTCTGTGATTACCTTACCCCAAAGCAGACGGGGACGGGATGCAGAGCACCCGTGTCTTCATCTTCTGCGGCAAGCACGTGAGTTCACATT
ENSMUSG00000022594	Lynx1	3379	25	117	100	ACCCCAAAGCAGACGGGGACGGGATGCAGAGCACCCGTGTCTTCATCTTCTGCGGCAAGCACGTGAGTTCACATTCTGAAACTCTAGAAAGATTTCCAGG
ENSMUSG00000022594	Lynx1	3379	25	118	100	GCAGAGCACCCGTGTCTTCATCTTCTGCGGCAAGCACGTGAGTTCACATTCTGAAACTCTAGAAAGATTTCCAGGAGTGGGGTGTGCCTTTGCTTTGGTG
ENSMUSG00000022594	Lynx1	3379	25	119	100	TGCGGCAAGCACGTGAGTTCACATTCTGAAACTCTAGAAAGATTTCCAGGAGTGGGGTGTGCCTTTGCTTTGGTGCATGGTTACTTCCTGGCAAGCACCG
ENSMUSG00000022594	Lynx1	3379	25	120	100	CTGAAACTCTAGAAAGATTTCCAGGAGTGGGGTGTGCCTTTGCTTTGGTGCATGGTTACTTCCTGGCAAGCACCGTGGCATCCCGCAGCACTGAGTGACC
ENSMUSG00000022594	Lynx1	3379	25	121	100	AGTGGGGTGTGCCTTTGCTTTGGTGCATGGTTACTTCCTGGCAAGCACCGTGGCATCCCGCAGCACTGAGTGACCTGGGCTCCTCAAGCCATCTCATTGG
ENSMUSG00000022594	Lynx1	3379	25	122	100	CATGGTTACTTCCTGGCAAGCACCGTGGCATCCCGCAGCACTGAGTGACCTGGGCTCCTCAAGCCATCTCATTGGTGAAATGACAGTGCCAGTACCCTCT
ENSMUSG00000022594	Lynx1	3379	25	123	100	TGGCATCCCGCAGCACTGAGTGACCTGGGCTCCTCAAGCCATCTCATTGGTGAAATGACAGTGCCAGTACCCTCTCAGCTGGCTCTTGGAGGCCTGTGCA
ENSMUSG00000022594	Lynx1	3379	25	124	100	TGGGCTCCTCAAGCCATCTCATTGGTGAAATGACAGTGCCAGTACCCTCTCAGCTGGCTCTTGGAGGCCTGTGCATGGGGTCTGCACAGAGGAGGCCCCC
ENSMUSG00000022594	Lynx1	3379	25	125	100	TGAAATGACAGTGCCAGTACCCTCTCAGCTGGCTCTTGGAGGCCTGTGCATGGGGTCTGCACAGAGGAGGCCCCCAAACTATGCATGGACGGACACGTGA
ENSMUSG00000022594	Lynx1	3379	25	126	100	CAGCTGGCTCTTGGAGGCCTGTGCATGGGGTCTGCACAGAGGAGGCCCCCAAACTATGCATGGACGGACACGTGATGCCTAGCACTTCCCTTGGTTGTGT
ENSMUSG00000022594	Lynx1	3379	25	127	100	TGGGGTCTGCACAGAGGAGGCCCCCAAACTATGCATGGACGGACACGTGATGCCTAGCACTTCCCTTGGTTGTGTCTCTGCCAACCCCAGGCTCTCACCC
ENSMUSG00000022594	Lynx1	3379	25	128	100	AAACTATGCATGGACGGACACGTGATGCCTAGCACTTCCCTTGGTTGTGTCTCTGCCAACCCCAGGCTCTCACCCAGCAAGGAAATGAAATCCACTTTTA
ENSMUSG00000022594	Lynx1	3379	25	129	100	TGCCTAGCACTTCCCTTGGTTGTGTCTCTGCCAACCCCAGGCTCTCACCCAGCAAGGAAATGAAATCCACTTTTATGACACATCTCCCTCCCCCAGCCAG
ENSMUSG00000022594	Lynx1	3379	25	130	100	CTCTGCCAACCCCAGGCTCTCACCCAGCAAGGAAATGAAATCCACTTTTATGACACATCTCCCTCCCCCAGCCAGCTCCATTCACCTATATGCCAGGGTG
ENSMUSG00000022594	Lynx1	3379	25	131	100	AGCAAGGAAATGAAATCCACTTTTATGACACATCTCCCTCCCCCAGCCAGCTCCATTCACCTATATGCCAGGGTGGTCCCTTTCAATGTCTGTCCCCCAT
ENSMUSG00000022594	Lynx1	3379	25	132	104	TGACACATCTCCCTCCCCCAGCCAGCTCCATTCACCTATATGCCAGGGTGGTCCCTTTCAATGTCTGTCCCCCATTGGATGAATAAACAAGCGAAGGACATGTG
ENSMUSG00000022602	Arc	1668	25	1	100	AGGGGCCAGCCCAGGGTCCCCAGCCCGCCTGCCACACCCAGCCTGTGGCTTTTGCCAACTAGGACTTGAGCTGGGGCTGACTCCCAAAGGGATGCCCTGT
ENSMUSG00000022602	Arc	1668	25	2	100	CGCCTGCCACACCCAGCCTGTGGCTTTTGCCAACTAGGACTTGAGCTGGGGCTGACTCCCAAAGGGATGCCCTGTCCAGCCAGACATCTACTCACCCACT
ENSMUSG00000022602	Arc	1668	25	3	100	TTTGCCAACTAGGACTTGAGCTGGGGCTGACTCCCAAAGGGATGCCCTGTCCAGCCAGACATCTACTCACCCACTGACCTGGCCTGACTCACAACTGCCA
ENSMUSG00000022602	Arc	1668	25	4	100	GCTGACTCCCAAAGGGATGCCCTGTCCAGCCAGACATCTACTCACCCACTGACCTGGCCTGACTCACAACTGCCACACAACCATGCTACATGGACTGAAC
ENSMUSG00000022602	Arc	1668	25	5	100	CCAGCCAGACATCTACTCACCCACTGACCTGGCCTGACTCACAACTGCCACACAACCATGCTACATGGACTGAACATCAAGAAGCCCCTTTCCCATAGGG
ENSMUSG00000022602	Arc	1668	25	6	100	GACCTGGCCTGACTCACAACTGCCACACAACCATGCTACATGGACTGAACATCAAGAAGCCCCTTTCCCATAGGGCTCCCACCTGCCGCCTACCCCTCAT
ENSMUSG00000022602	Arc	1668	25	7	100	CACAACCATGCTACATGGACTGAACATCAAGAAGCCCCTTTCCCATAGGGCTCCCACCTGCCGCCTACCCCTCATCTGTCTGCCCTGGTCCTGGCCCCCA
ENSMUSG00000022602	Arc	1668	25	8	100	ATCAAGAAGCCCCTTTCCCATAGGGCTCCCACCTGCCGCCTACCCCTCATCTGTCTGCCCTGGTCCTGGCCCCCAGCCCCATTGGCCTCACCCTCTACAC
ENSMUSG00000022602	Arc	1668	25	9	100	CTCCCACCTGCCGCCTACCCCTCATCTGTCTGCCCTGGTCCTGGCCCCCAGCCCCATTGGCCTCACCCTCTACACTCTCAGACCATCACAGAACACGATC
ENSMUSG00000022602	Arc	1668	25	10	100	CTGTCTGCCCTGGTCCTGGCCCCCAGCCCCATTGGCCTCACCCTCTACACTCTCAGACCATCACAGAACACGATCTGGCTTCCTCATTCTGCTCCAGTGT
ENSMUSG00000022602	Arc	1668	25	11	100	GCCCCATTGGCCTCACCCTCTACACTCTCAGACCATCACAGAACACGATCTGGCTTCCTCATTCTGCTCCAGTGTCCAGGGCTCTTTGGGTAATCAAGAA
ENSMUSG00000022602	Arc	1668	25	12	100	TCTCAGACCATCACAGAACACGATCTGGCTTCCTCATTCTGCTCCAGTGTCCAGGGCTCTTTGGGTAATCAAGAAACCAAGTGTCTGAAAGGCAACAAAA
ENSMUSG00000022602	Arc	1668	25	13	100	TGGCTTCCTCATTCTGCTCCAGTGTCCAGGGCTCTTTGGGTAATCAAGAAACCAAGTGTCTGAAAGGCAACAAAAAGTAGGCACCAAAACCCAGGGGACA
ENSMUSG00000022602	Arc	1668	25	14	100	CCAGGGCTCTTTGGGTAATCAAGAAACCAAGTGTCTGAAAGGCAACAAAAAGTAGGCACCAAAACCCAGGGGACATCCTAGGGCAGATGCTAAAGCAGAG
ENSMUSG00000022602	Arc	1668	25	15	100	ACCAAGTGTCTGAAAGGCAACAAAAAGTAGGCACCAAAACCCAGGGGACATCCTAGGGCAGATGCTAAAGCAGAGATGCTGAGGGAACCTCAACTTCCGG
ENSMUSG00000022602	Arc	1668	25	16	100	AGTAGGCACCAAAACCCAGGGGACATCCTAGGGCAGATGCTAAAGCAGAGATGCTGAGGGAACCTCAACTTCCGGGGATGCAGCCCACTCCTGCAGACAC
ENSMUSG00000022602	Arc	1668	25	17	100	TCCTAGGGCAGATGCTAAAGCAGAGATGCTGAGGGAACCTCAACTTCCGGGGATGCAGCCCACTCCTGCAGACACAGCAGATCCAGCTGGTACCCTAGCT
ENSMUSG00000022602	Arc	1668	25	18	100	ATGCTGAGGGAACCTCAACTTCCGGGGATGCAGCCCACTCCTGCAGACACAGCAGATCCAGCTGGTACCCTAGCTGCCGCCCAGGGCAACCGGCCAGTCT
ENSMUSG00000022602	Arc	1668	25	19	100	GGATGCAGCCCACTCCTGCAGACACAGCAGATCCAGCTGGTACCCTAGCTGCCGCCCAGGGCAACCGGCCAGTCTTGGGCAGCATAGCTCCCCTCCCAGG
ENSMUSG00000022602	Arc	1668	25	20	100	AGCAGATCCAGCTGGTACCCTAGCTGCCGCCCAGGGCAACCGGCCAGTCTTGGGCAGCATAGCTCCCCTCCCAGGGGTGAGCTGAAGCCACAAATGCAGC
ENSMUSG00000022602	Arc	1668	25	21	100	GCCGCCCAGGGCAACCGGCCAGTCTTGGGCAGCATAGCTCCCCTCCCAGGGGTGAGCTGAAGCCACAAATGCAGCTGAAGCAGCAGACCTGACATCCTGG
ENSMUSG00000022602	Arc	1668	25	22	100	TGGGCAGCATAGCTCCCCTCCCAGGGGTGAGCTGAAGCCACAAATGCAGCTGAAGCAGCAGACCTGACATCCTGGCACCTCCTGGCCCCCAGCAGTGATT
ENSMUSG00000022602	Arc	1668	25	23	100	GGTGAGCTGAAGCCACAAATGCAGCTGAAGCAGCAGACCTGACATCCTGGCACCTCCTGGCCCCCAGCAGTGATTCATACCAGTGAAGAAGAGCAGAGCT
ENSMUSG00000022602	Arc	1668	25	24	100	TGAAGCAGCAGACCTGACATCCTGGCACCTCCTGGCCCCCAGCAGTGATTCATACCAGTGAAGAAGAGCAGAGCTCAGCTCCGTGACTCAGCCATGGCAG
ENSMUSG00000022602	Arc	1668	25	25	100	CACCTCCTGGCCCCCAGCAGTGATTCATACCAGTGAAGAAGAGCAGAGCTCAGCTCCGTGACTCAGCCATGGCAGGCGGAGGGTCCCCGAGGGGCTGAGT
ENSMUSG00000022602	Arc	1668	25	26	100	CATACCAGTGAAGAAGAGCAGAGCTCAGCTCCGTGACTCAGCCATGGCAGGCGGAGGGTCCCCGAGGGGCTGAGTCCTCACACCCAGCCGAGGCAGCGGC
ENSMUSG00000022602	Arc	1668	25	27	100	CAGCTCCGTGACTCAGCCATGGCAGGCGGAGGGTCCCCGAGGGGCTGAGTCCTCACACCCAGCCGAGGCAGCGGCTGGAGCCTACAGAGCCAGGAGAATG
ENSMUSG00000022602	Arc	1668	25	28	100	GCGGAGGGTCCCCGAGGGGCTGAGTCCTCACACCCAGCCGAGGCAGCGGCTGGAGCCTACAGAGCCAGGAGAATGACACCAGGTCTCAAGGCTGCTGAGA
[truncated: 2,815 more rows]

## Sheet: B) Bzip reproter library enrich
Table S1. (A) List of genes and tiled 3'UTR fragments included in the N-zip library and (B) Neurite/Soma enrichment values. [B] The columns contain: A: ENSEMBL gene_id of the originating gene B: name of the originating gene C: number of the tile (by position in the genome) D: Neurite/Soma log2ratio and (E) adjusted p-value from WT PCN both calculated by DESeq2 F: mean Neurite/Soma log2ratio and (…
source_gene_id	source_gene_name	tile_id	DESeq_log2ratio_NeuriteSoma_WT	DESeq_padj_NeuriteSoma_WT	Mean_log2ratio_NeuriteSoma_WT	Mean_padj_NeuriteSoma_WT	Mean_log2ratio_NeuriteSoma_shElavl234	Mean_padj_NeuriteSoma_shElavl234	Mean_log2ratio_NeuriteSoma_shScramble	Mean_padj_NeuriteSoma_shScramble
ENSMUSG00000001289	Pfdn5	1	-0.0964446	0.935704	-0.0973447	0.83345	0.12249	0.0845887	0.0854702	0.394456
ENSMUSG00000001289	Pfdn5	2	-1.39592	6.31e-07	-1.37672	0.00779923	0.073437	0.265021	0.0238034	0.431242
ENSMUSG00000001289	Pfdn5	3	-0.6856	0.185088	-0.669958	0.306777	0.164717	0.0566945	-0.0417405	0.706241
ENSMUSG00000001289	Pfdn5	4	-0.166761	0.859645	-0.17359	0.720598	0.134842	0.104918	-0.0610648	0.408394
ENSMUSG00000001289	Pfdn5	5	-0.163476	0.824126	-0.150391	0.59918	0.120105	0.169368	0.114369	0.0719483
ENSMUSG00000001289	Pfdn5	6	-0.0652491	0.943835	-0.0571339	0.832688	0.0418675	0.104979	-0.0514447	0.443122
ENSMUSG00000001289	Pfdn5	7	0.465023	0.26227	0.476315	0.142412	0.150218	0.0242583	0.135347	0.00171339
ENSMUSG00000001289	Pfdn5	8	0.166431	0.782615	0.183023	0.162188	-0.0827704	0.0294693	-0.0255973	0.216724
ENSMUSG00000001289	Pfdn5	9	-0.0250382	0.989626	-0.016253	0.964382	0.0843983	0.216171	0.0893226	0.261744
ENSMUSG00000001289	Pfdn5	10	-0.538999	0.240472	-0.521606	0.241641	-0.0199801	0.79078	-0.0441832	0.62251
ENSMUSG00000001289	Pfdn5	11	-0.0725002	0.931738	-0.0572603	0.86252	-0.0571501	0.0383055	-0.099563	0.29444
ENSMUSG00000001289	Pfdn5	12	-0.206793	0.781538	-0.203609	0.444395	-0.0157514	0.876589	0.0681577	0.220618
ENSMUSG00000001289	Pfdn5	13	-0.054949	0.945931	-0.0433559	0.816267	-0.0975032	0.136075	0.0255578	0.684038
ENSMUSG00000001289	Pfdn5	14	0.503755	0.290148	0.518304	0.0221861	0.368295	0.00602771	0.309485	0.0481784
ENSMUSG00000001289	Pfdn5	15	0.45466	0.306972	0.469014	0.0516796	0.0630942	0.370608	0.0407155	0.473142
ENSMUSG00000001289	Pfdn5	16	-0.904948	0.0434582	-0.900551	0.0932983	-0.343763	0.0296261	-0.254152	0.00932114
ENSMUSG00000001289	Pfdn5	17	0.62031	0.080811	0.633361	0.0963121	0.0991308	0.100586	0.0531886	0.439955
ENSMUSG00000001289	Pfdn5	18	0.54535	0.0528674	0.560921	0.00907408	0.0627054	0.170238	0.0298918	0.49594
ENSMUSG00000004945	Tmem242	1	0.172128	0.785175	0.186682	0.123405	0.0639757	0.0409095	0.0341669	0.229708
ENSMUSG00000004945	Tmem242	2	0.267882	0.586879	0.284917	0.286119	0.0468624	0.47718	0.012233	0.722061
ENSMUSG00000004945	Tmem242	3	-0.369233	0.48642	-0.360495	0.226344	0.0599398	0.00442773	0.0473064	0.0832457
ENSMUSG00000004945	Tmem242	4	-0.0799798	0.924946	-0.0697612	0.836074	0.04514	0.384632	-0.000696206	0.991051
ENSMUSG00000004945	Tmem242	5	0.124216	0.8252	0.136259	0.574554	0.194474	0.0202028	0.0599895	0.154795
ENSMUSG00000004945	Tmem242	6	0.380849	0.592647	0.387087	0.484113	0.188621	0.0157017	0.143498	0.0608955
ENSMUSG00000004945	Tmem242	7	-0.0821059	0.928587	-0.0713808	0.853559	0.127988	0.0293084	0.000245805	0.996344
ENSMUSG00000004945	Tmem242	8	0.50805	0.358432	0.51745	0.2114	-0.108025	0.223123	-0.0791316	0.358752
ENSMUSG00000004945	Tmem242	9	-0.270281	0.702598	-0.262652	0.491141	0.0177409	0.793034	-0.0749445	0.229007
ENSMUSG00000004945	Tmem242	10	-0.215632	0.740929	-0.2022	0.211591	0.0650501	0.0348855	-0.045628	0.507459
ENSMUSG00000004945	Tmem242	11	0.0527658	0.948656	0.0644765	0.844593	0.0577831	0.0207049	0.0527749	0.489857
ENSMUSG00000004945	Tmem242	12	-0.129891	0.818817	-0.113621	0.256639	-0.17823	0.0725451	0.0429857	0.791658
ENSMUSG00000004945	Tmem242	13	-0.245754	0.685728	-0.22958	0.439517	-0.126034	0.303864	0.103202	0.619535
ENSMUSG00000004945	Tmem242	14	-0.0535256	0.943962	-0.0372255	0.876292	-0.134398	0.208029	0.0598428	0.794443
ENSMUSG00000004945	Tmem242	15	-0.66433	0.024138	-0.647869	0.0638573	0.0234098	0.627263	0.0930724	0.132283
ENSMUSG00000004945	Tmem242	16	0.774647	0.524744	0.743012	0.265503	-0.185343	0.213088	0.0821861	0.590906
ENSMUSG00000004945	Tmem242	17	2.81153	0.291656	0	NA	NA	NA	NA	NA
ENSMUSG00000004945	Tmem242	18	-3.75966	0.342322	0	NA	-0.37075	0.088793	0.350075	0.336233
ENSMUSG00000004945	Tmem242	19	NA	NA	0	NA	NA	NA	NA	NA
ENSMUSG00000004945	Tmem242	20	0.0691762	0.917954	0.0850324	0.521928	-0.000549418	0.986034	0.0166152	0.566117
ENSMUSG00000004945	Tmem242	21	0.616463	0.062378	0.632714	0.00767625	-0.0684376	0.278856	0.0700607	0.109942
ENSMUSG00000004945	Tmem242	22	0.605362	0.0449372	0.620597	0.0623696	-0.0758266	0.0697464	-0.0985829	0.0457128
ENSMUSG00000004945	Tmem242	23	0.233188	0.683347	0.242323	0.472214	-0.177908	0.106431	-0.101306	0.022976
ENSMUSG00000004945	Tmem242	24	0.762943	0.0182949	0.777918	0.0537782	-0.0992807	0.0483407	-0.152891	0.0371112
ENSMUSG00000004945	Tmem242	25	0.183453	0.822856	0.208045	0.695451	0.0519026	0.49643	0.077135	0.124477
ENSMUSG00000004945	Tmem242	26	0.151136	0.860422	0.144607	0.811386	0.115027	0.0169415	0.0839855	0.0205059
ENSMUSG00000004945	Tmem242	27	-0.228627	0.637728	-0.211218	0.340048	-0.0298674	0.454204	-0.0171164	0.764767
ENSMUSG00000004945	Tmem242	28	0.305429	0.454984	0.321338	0.148015	0.185612	0.0382542	0.091527	0.16478
ENSMUSG00000004945	Tmem242	29	-0.422503	0.402965	-0.406498	0.199143	0.121174	0.0784989	0.101916	0.24184
ENSMUSG00000006699	Cdc42_1	1	-0.214011	0.656818	-0.200661	0.447591	-0.530339	0.00118388	-0.447886	0.0195396
ENSMUSG00000006699	Cdc42_2	1	0.0431719	0.976253	0.0519718	0.932104	0.116856	0.393825	0.0395743	0.738915
ENSMUSG00000006699	Cdc42_1	2	-0.546987	0.198126	-0.533777	0.1832	-0.321712	0.0125061	-0.249716	0.188135
ENSMUSG00000006699	Cdc42_2	2	0.145065	0.835824	0.159122	0.63328	0.0143155	0.83508	0.266534	0.186737
ENSMUSG00000006699	Cdc42_1	3	0.0669193	0.91225	0.0829432	0.37408	-0.134701	0.113137	0.108589	0.448491
ENSMUSG00000006699	Cdc42_2	3	0.105652	0.884072	0.121287	0.639329	-0.324541	0.199142	-0.0277771	0.905675
ENSMUSG00000006699	Cdc42_1	4	-0.154122	0.8025	-0.141443	0.370848	-0.0689155	0.402601	0.0387317	0.765889
ENSMUSG00000006699	Cdc42_2	4	0.141559	0.808366	0.155729	0.434665	0.0126221	0.756205	-0.0583842	0.0376091
ENSMUSG00000006699	Cdc42_1	5	0.00961935	0.99432	0.0258017	0.846831	0.00916785	0.892768	0.0935957	0.497736
ENSMUSG00000006699	Cdc42_2	5	-0.473196	0.351994	-0.45293	0.383472	-0.128749	0.00233189	-0.135455	0.00296772
ENSMUSG00000006699	Cdc42_1	6	0.010537	0.991256	0.026804	0.657177	-0.270337	0.0667749	0.0129959	0.933434
ENSMUSG00000006699	Cdc42_2	6	-0.387322	0.709259	-0.397151	0.421491	0.0730728	0.459834	0.0870003	0.473205
ENSMUSG00000006699	Cdc42_1	7	-0.14302	0.793969	-0.125995	0.439737	-0.202439	0.058766	-0.0372227	0.72735
ENSMUSG00000006699	Cdc42_2	7	-0.29093	0.618787	-0.278807	0.526921	-0.0967625	0.167355	0.0395242	0.322159
ENSMUSG00000006699	Cdc42_1	8	-0.367312	0.451873	-0.351292	0.0424448	-0.0148455	0.841444	0.176314	0.0486345
ENSMUSG00000006699	Cdc42_2	8	-0.100571	0.913695	-0.085907	0.80428	0.264328	0.155857	0.330643	0.00811522
ENSMUSG00000006699	Cdc42_1	9	0.0536969	0.947914	0.0698774	0.635378	0.0405252	0.369421	-0.0287557	0.4871
ENSMUSG00000006699	Cdc42_2	9	-0.277496	0.656243	-0.263501	0.065305	0.125887	0.362727	0.216729	0.226757
ENSMUSG00000006699	Cdc42_1	10	-0.140516	0.821082	-0.123617	0.452654	-0.180915	0.193107	-0.0049591	0.976037
ENSMUSG00000006699	Cdc42_2	10	-0.124494	0.842038	-0.108001	0.510695	-0.031292	0.41589	0.1323	0.116411
ENSMUSG00000006699	Cdc42_1	11	0.109267	0.88726	0.126462	0.452241	-0.101026	0.352418	0.0582223	0.73604
ENSMUSG00000006699	Cdc42_2	11	-0.599244	0.338852	-0.589703	0.24451	0.181478	0.176211	0.121908	0.301534
ENSMUSG00000006699	Cdc42_1	12	-0.100209	0.899136	-0.0816748	0.673023	0.0914559	0.144311	0.203841	0.0267631
ENSMUSG00000006699	Cdc42_2	12	-0.70684	0.155572	-0.699088	0.137943	-0.409426	0.0068328	-0.272195	0.0929162
ENSMUSG00000006699	Cdc42_1	13	-0.153333	0.787011	-0.138642	0.192811	0.0614696	0.362834	0.110597	0.135639
ENSMUSG00000006699	Cdc42_2	13	-0.325281	0.669613	-0.307041	0.0412317	-0.0930499	0.0867333	-0.193096	0.0290975
ENSMUSG00000006699	Cdc42_1	14	0.101674	0.868475	0.116738	0.624216	-0.137138	0.0704399	-0.0145351	0.89966
ENSMUSG00000006699	Cdc42_2	14	-0.335695	0.385756	-0.320582	0.112778	-0.0964768	0.168273	-0.0112083	0.796861
ENSMUSG00000006699	Cdc42_1	15	-0.318629	0.505845	-0.302223	0.228612	-0.348507	0.0424876	-0.201164	0.197471
ENSMUSG00000006699	Cdc42_2	15	-0.297335	0.47042	-0.280722	0.0303172	-0.184025	0.0346709	-0.187609	0.0309246
ENSMUSG00000006699	Cdc42_1	16	-0.837468	0.241926	-0.843219	0.254604	-0.554004	0.00121291	-0.558663	0.0091725
ENSMUSG00000006699	Cdc42_2	16	0.0778563	0.885441	0.0927978	0.50618	-0.0851913	0.0558341	-0.0267071	0.468572
ENSMUSG00000006699	Cdc42_1	17	-0.607891	0.588218	-0.604864	0.314474	-0.473628	0.123701	-0.49042	0.0173229
ENSMUSG00000006699	Cdc42_2	17	0.10162	0.849692	0.118129	0.560614	-0.187814	0.00334846	-0.0658242	0.175833
ENSMUSG00000006699	Cdc42_1	18	-0.993569	0.01455	-0.988156	0.052015	-0.563133	0.0434781	-0.564533	0.0605989
ENSMUSG00000006699	Cdc42_2	18	-0.338945	0.402725	-0.323431	0.0852542	-0.425796	0.00208826	-0.538717	0.0193489
ENSMUSG00000006699	Cdc42_1	19	-0.591415	0.130266	-0.573438	0.269026	-0.287748	0.00470166	-0.180769	0.0356642
ENSMUSG00000006699	Cdc42_2	19	-0.37534	0.280338	-0.360469	0.0397717	-0.0612165	0.250264	-0.0236234	0.747306
ENSMUSG00000006699	Cdc42_1	20	-0.0926655	0.930317	-0.0831593	0.739668	-0.153939	0.0417874	-0.170716	0.00360255
ENSMUSG00000006699	Cdc42_2	20	0.0395679	0.954892	0.0540666	0.868959	0.0738282	0.312572	0.0594231	0.0506309
ENSMUSG00000006699	Cdc42_1	21	-0.350372	0.449049	-0.340634	0.268985	-0.0638285	0.0129069	-0.00818862	0.886436
ENSMUSG00000006699	Cdc42_2	21	-0.821138	0.0990307	-0.830963	0.18667	0.289067	0.0964699	0.290477	0.0627287
ENSMUSG00000006699	Cdc42_1	22	-0.20964	0.579765	-0.194189	0.082784	-0.185496	0.02592	0.00600952	0.960129
ENSMUSG00000006699	Cdc42_2	22	0.150037	0.757148	0.166607	0.242989	0.323819	0.0208423	0.214461	0.0304572
ENSMUSG00000006699	Cdc42_1	23	0.153633	0.754276	0.168847	0.374545	-0.0670025	0.0521775	0.043582	0.689696
ENSMUSG00000006699	Cdc42_2	23	0.124177	0.818817	0.137519	0.458339	0.0263811	0.097809	0.106824	0.0691261
ENSMUSG00000006699	Cdc42_1	24	0.00982067	0.993126	0.0256275	0.780919	0.128991	0.00317203	0.0225903	0.795771
ENSMUSG00000006699	Cdc42_2	24	-0.0766711	0.91194	-0.0626699	0.828405	-0.110827	0.00821706	-0.100193	0.0670669
ENSMUSG00000006699	Cdc42_1	25	0.0247337	0.976967	0.0372724	0.916112	-0.0507911	0.401443	0.0024162	0.934919
ENSMUSG00000006699	Cdc42_2	25	0.238082	0.597719	0.252743	0.250237	-0.0316489	0.73673	-0.0333316	0.34323
ENSMUSG00000006699	Cdc42_1	26	-0.401373	0.274877	-0.384673	0.0525273	-0.0856277	0.217535	0.0181422	0.797875
ENSMUSG00000006699	Cdc42_2	26	0.19024	0.782615	0.201082	0.411906	0.00610842	0.806526	-0.0852798	0.129437
ENSMUSG00000006699	Cdc42_1	27	-0.205302	0.667232	-0.187606	0.364369	0.0291591	0.584041	-0.0410508	0.449803
ENSMUSG00000006699	Cdc42_2	27	0.210318	0.613379	0.226798	0.142455	-0.194911	0.0688954	-0.155542	0.0218181
ENSMUSG00000006699	Cdc42_1	28	-0.518538	0.38384	-0.513579	0.205729	0.474725	0.0392681	0.195332	0.122813
ENSMUSG00000006699	Cdc42_2	28	0.00603908	0.998697	0.0218729	0.924676	-0.26082	0.0130587	-0.240648	0.00328188
ENSMUSG00000006699	Cdc42_2	29	-0.340303	0.443509	-0.327981	0.210681	-0.0497738	0.481235	-0.0700556	0.0387613
ENSMUSG00000006699	Cdc42_2	30	-0.213305	0.739431	-0.199506	0.622291	-0.00147168	0.970081	0.0988097	0.461802
ENSMUSG00000006699	Cdc42_2	31	1.3121	5.19e-08	1.3285	0.0278092	0.263095	0.0685002	0.421672	0.00571691
ENSMUSG00000006699	Cdc42_2	32	-0.0551936	0.943724	-0.0373944	0.853125	0.360806	0.00848452	0.495877	0.0424532
ENSMUSG00000006699	Cdc42_2	33	-0.00693676	0.997987	0.00835952	0.8774	0.0637993	0.148582	0.244071	0.0167252
ENSMUSG00000006699	Cdc42_2	34	-0.0384294	0.949495	-0.0241533	0.876413	-0.047385	0.449866	0.115968	0.319233
ENSMUSG00000006699	Cdc42_2	35	-0.386207	0.402965	-0.375246	0.15375	-0.200605	0.0348665	0.135656	0.423014
ENSMUSG00000006699	Cdc42_2	36	-0.0168971	0.98362	-0.000673649	0.990889	0.0659463	0.13172	0.0500352	0.222834
ENSMUSG00000006699	Cdc42_2	37	0.149827	0.903324	0.154111	0.775842	0.245281	0.0445119	-0.0496428	0.0812471
ENSMUSG00000006699	Cdc42_2	38	0.150603	0.857836	0.168732	0.447758	0.148414	0.314076	0.0946513	0.11348
ENSMUSG00000006699	Cdc42_2	39	0.312471	0.692148	0.3272	0.494137	-0.0248516	0.115834	0.0232599	0.726202
ENSMUSG00000006699	Cdc42_2	40	-0.292764	0.669613	-0.285771	0.39531	0.0520192	0.463232	0.0348239	0.42756
ENSMUSG00000006699	Cdc42_2	41	-0.0206419	0.986829	-0.00597875	0.980552	0.213387	0.0545092	0.0893909	0.0342444
ENSMUSG00000006699	Cdc42_2	42	0.103564	0.906483	0.118452	0.571377	0.226664	0.000274612	0.112382	0.132358
ENSMUSG00000006699	Cdc42_2	43	-0.0724988	0.917094	-0.057632	0.425814	-0.159717	0.0560425	-0.220911	0.0105732
ENSMUSG00000006699	Cdc42_2	44	0.120039	0.862207	0.13245	0.666106	-0.136991	0.0176017	-0.142196	0.0446657
ENSMUSG00000006699	Cdc42_2	45	-0.0770125	0.919133	-0.0654824	0.749025	-0.0373673	0.250303	-0.0414307	0.432886
ENSMUSG00000006699	Cdc42_2	46	0.307784	0.625357	0.323666	0.129693	-0.247563	0.0182831	-0.266525	0.00994708
ENSMUSG00000006699	Cdc42_2	47	-0.191434	0.807116	-0.173984	0.210861	-0.0928448	0.149533	-0.105109	0.124676
ENSMUSG00000006699	Cdc42_2	48	0.0264391	0.976967	0.0400123	0.821299	-0.228982	0.120567	-0.0520195	0.32988
ENSMUSG00000006699	Cdc42_2	49	-0.073398	0.901313	-0.0572413	0.714109	-0.141591	0.00907141	0.0413122	0.412769
ENSMUSG00000006699	Cdc42_2	50	-0.257226	0.533087	-0.241618	0.282709	-0.40709	0.0138975	-0.0569282	0.657623
ENSMUSG00000006699	Cdc42_2	51	-0.303774	0.39488	-0.287372	0.105755	-0.125457	0.0227006	-0.0604816	0.311709
ENSMUSG00000006699	Cdc42_2	52	-0.0372454	0.950225	-0.0214187	0.83976	-0.345149	0.00862492	-0.178606	0.130114
ENSMUSG00000006699	Cdc42_2	53	0.0970359	0.893308	0.114121	0.392016	-0.123893	3.98e-05	-0.00671295	0.970351
ENSMUSG00000007950	Abhd8	1	0.613371	0.290916	0.621004	0.323572	0.457421	0.00842655	0.371623	0.0116491
ENSMUSG00000007950	Abhd8	2	0.390659	0.463164	0.416299	0.351696	0.431469	0.00317823	0.361918	0.00808779
ENSMUSG00000007950	Abhd8	3	0.154898	0.882851	0.170007	0.800839	0.601052	0.00243057	0.407178	0.00277473
ENSMUSG00000007950	Abhd8	4	0.992733	0.104309	0.978375	0.324492	0.679327	0.00327873	0.460385	0.0044193
ENSMUSG00000007950	Abhd8	5	0.455822	0.592647	0.437728	0.612915	0.195729	0.0072834	0.179123	0.0168576
ENSMUSG00000007950	Abhd8	6	0.758715	0.0829013	0.771705	0.0357027	0.182104	0.0502734	0.0751575	0.077978
ENSMUSG00000007950	Abhd8	7	0.0205853	0.987133	0.0289506	0.932295	0.0243297	0.193416	-0.0411555	0.265283
ENSMUSG00000007950	Abhd8	8	0.599027	0.0402657	0.612985	0.0570601	-0.0126169	0.787676	-0.0935166	0.227914
ENSMUSG00000007950	Abhd8	9	-0.147392	0.797707	-0.134832	0.421804	0.0456853	0.0815302	-0.0403171	0.0931122
ENSMUSG00000007950	Abhd8	10	-0.0493491	0.937167	-0.0342884	0.668548	0.00157138	0.977472	-0.0278387	0.421565
ENSMUSG00000007950	Abhd8	11	-0.115477	0.869171	-0.104627	0.668245	-0.100444	0.131852	-0.118319	0.015216
ENSMUSG00000007950	Abhd8	12	-0.110148	0.818503	-0.0936648	0.502293	-0.221248	0.00152822	-0.22409	0.0101141
ENSMUSG00000007950	Abhd8	13	0.091379	0.880896	0.106991	0.659873	-0.172358	0.00606344	-0.203879	0.0400072
ENSMUSG00000007950	Abhd8	14	-0.0362349	0.948656	-0.020354	0.358557	-0.241003	0.0460382	-0.217115	0.0088075
ENSMUSG00000007950	Abhd8	15	-0.242563	0.665175	-0.225364	0.227116	-0.312442	0.05369	-0.248462	0.0202099
ENSMUSG00000007950	Abhd8	16	-0.173063	0.773064	-0.163489	0.573106	-0.544235	0.00232897	-0.520511	0.00652429
ENSMUSG00000007950	Abhd8	17	0.342103	0.389962	0.355707	0.152467	-0.163398	0.0322842	-0.109277	0.0104775
ENSMUSG00000007950	Abhd8	18	-1.07758	0.125172	-1.06378	0.0191405	-0.754466	0.0126008	-0.48616	0.0180195
ENSMUSG00000007950	Abhd8	19	-0.513532	0.38384	-0.500087	0.109726	-0.492134	0.0195053	-0.314955	0.040978
ENSMUSG00000007950	Abhd8	20	0.308162	0.474063	0.321625	0.229335	0.103683	0.0396708	0.0311762	0.199325
ENSMUSG00000007950	Abhd8	21	0.0728864	0.91988	0.0858538	0.655094	0.15233	0.109466	0.0915871	0.173842
ENSMUSG00000007950	Abhd8	22	0.214787	0.630655	0.229941	0.108585	0.0954426	0.0967711	0.0975843	0.0924849
ENSMUSG00000007950	Abhd8	23	0.458376	0.442772	0.467409	0.488244	0.240734	0.0537547	0.19507	0.0122258
ENSMUSG00000007950	Abhd8	24	0.446977	0.241863	0.460236	0.0858631	0.119033	0.112713	0.0660674	0.0196891
ENSMUSG00000007950	Abhd8	25	0.294634	0.466299	0.30854	0.162846	-0.27807	0.0157316	-0.260166	0.0244156
ENSMUSG00000007950	Abhd8	26	0.584839	0.0923113	0.59977	0.0383538	0.168203	0.0238262	0.0984346	0.0750942
ENSMUSG00000007950	Abhd8	27	0.138112	0.884072	0.146329	0.763796	0.878645	0.0192424	0.615973	0.00448532
ENSMUSG00000007950	Abhd8	28	0.131738	0.805825	0.147694	0.380003	1.56029	0.0194915	1.39564	0.0212766
ENSMUSG00000008668	Rps18	1	0.137808	0.804993	0.154215	0.0582834	0.0239415	0.49491	-0.0325962	0.532087
ENSMUSG00000008668	Rps18	2	0.310145	0.442305	0.326507	0.0191758	0.189876	0.00857355	0.140813	0.0100473
ENSMUSG00000008668	Rps18	3	0.135546	0.817048	0.146454	0.605957	0.0768319	0.120808	0.01874	0.609544
ENSMUSG00000008668	Rps18	4	-0.127315	0.868475	-0.112144	0.446721	0.0208198	0.351199	0.0274137	0.324174
ENSMUSG00000008668	Rps18	5	0.0559684	0.95458	0.0677981	0.859328	0.0264548	0.582269	-0.0513913	0.386282
ENSMUSG00000008668	Rps18	6	-1.04439	0.214891	-1.1238	0.31679	0.052237	0.258689	-0.0484555	0.0756005
ENSMUSG00000008668	Rps18	7	0.0214476	0.985038	0.0384394	0.901071	-0.0713971	0.105298	0.156495	0.225287
ENSMUSG00000008855	Hdac5	1	-1.07774	1.28e-08	-1.06165	0.000281772	0.0190055	0.695782	0.049728	0.252706
ENSMUSG00000008855	Hdac5	2	-1.0257	0.000614613	-1.01345	0.109941	0.0503156	0.417619	-0.000968329	0.980391
ENSMUSG00000008855	Hdac5	3	0.0551233	0.957984	0.0716593	0.810511	-0.440139	0.0732316	-0.451562	0.0117226
ENSMUSG00000008855	Hdac5	4	-0.103664	0.940947	-0.0953503	0.727435	1.05851	0.00246007	1.17559	0.000423976
ENSMUSG00000008855	Hdac5	5	-0.287556	0.543793	-0.278489	0.322196	0.103261	0.187859	0.123215	0.00347807
ENSMUSG00000008855	Hdac5	6	0.308771	0.349435	0.324134	0.0297159	-0.0697572	0.248322	-0.0160109	0.815088
ENSMUSG00000008855	Hdac5	7	0.0901071	0.93918	0.108987	0.8668	0.0114239	0.666833	-0.0306363	0.757648
ENSMUSG00000008855	Hdac5	8	0.510299	0.112304	0.525335	0.0675551	0.00384432	0.935102	0.0488986	0.397411
ENSMUSG00000008855	Hdac5	9	0.138787	0.820821	0.150312	0.63234	-0.0696267	0.108934	-0.0364449	0.223488
ENSMUSG00000008855	Hdac5	10	-0.358498	0.45584	-0.351047	0.353565	-0.0921923	0.115536	-0.0331611	0.486422
ENSMUSG00000008855	Hdac5	11	0.0896006	0.907604	0.0994506	0.802618	-0.0914943	0.14931	-0.106775	0.0492429
ENSMUSG00000008855	Hdac5	12	0.112602	0.904811	0.114803	0.849529	-0.0478466	0.238803	-0.0472465	0.459635
ENSMUSG00000008855	Hdac5	13	-0.430027	0.503168	-0.404743	0.545607	-0.000790736	0.982416	-0.0504278	0.322275
ENSMUSG00000008855	Hdac5	14	-0.0290596	0.968407	-0.0126229	0.81425	0.0606088	0.264466	0.0458316	0.140862
ENSMUSG00000008855	Hdac5	15	0.274909	0.571597	0.291802	0.160591	0.0927319	0.045842	0.0918734	0.0781577
ENSMUSG00000008855	Hdac5	16	0.0915502	0.927512	0.107871	0.482853	-0.0104558	0.843926	-0.0107512	0.872377
ENSMUSG00000008855	Hdac5	17	0.201822	0.627067	0.216351	0.17953	-0.140161	0.0299653	-0.144065	0.0180609
ENSMUSG00000008855	Hdac5	18	0.0958697	0.868475	0.108924	0.655466	-0.0843342	0.19561	-0.115783	0.10023
ENSMUSG00000008855	Hdac5	19	0.101209	0.818185	0.116996	0.197434	-0.131545	0.0828322	-0.209868	0.0161202
ENSMUSG00000008855	Hdac5	20	0.299818	0.363218	0.315788	0.0933815	-0.0888632	0.0131388	-0.0626235	0.119054
ENSMUSG00000008855	Hdac5	21	0.149356	0.750218	0.16452	0.110393	0.060481	0.0225999	0.05731	0.275372
ENSMUSG00000008855	Hdac5	22	0.343753	0.461418	0.35868	0.0137421	0.132938	0.0490777	0.0729649	0.272002
ENSMUSG00000008855	Hdac5	23	0.118487	0.904336	0.130051	0.693363	-0.211978	0.0242986	-0.304418	0.0605184
ENSMUSG00000008855	Hdac5	24	0.627706	0.342374	0.639879	0.0420526	0.198164	0.173747	0.00619285	0.944465
ENSMUSG00000008855	Hdac5	25	0.205229	0.69731	0.217664	0.373767	0.078552	0.226643	-0.0639648	0.216499
ENSMUSG00000008855	Hdac5	26	0.00288322	0.998697	0.0115244	0.971649	-0.191869	0.0385725	-0.22017	0.00817356
ENSMUSG00000008855	Hdac5	27	0.334567	0.472425	0.349057	0.064737	0.105519	0.0586144	0.106022	0.0614329
ENSMUSG00000008855	Hdac5	28	0.295416	0.722365	0.302865	0.346069	0.0244083	0.798787	-0.00874765	0.912759
ENSMUSG00000008855	Hdac5	29	0.132872	0.854224	0.150631	0.342612	0.056504	0.155868	-0.0185646	0.73238
ENSMUSG00000008855	Hdac5	30	0.510262	0.283239	0.522843	0.0756016	0.0466523	0.39306	0.0784791	0.16124
ENSMUSG00000008855	Hdac5	31	0.17297	0.748215	0.188479	0.159711	0.0821639	0.146361	0.0109929	0.753436
ENSMUSG00000008855	Hdac5	32	0.228917	0.695953	0.23851	0.444469	0.0686709	0.0021046	0.01547	0.605537
ENSMUSG00000008855	Hdac5	33	0.224719	0.639768	0.238161	0.303088	0.146033	0.0239534	0.0844643	0.0107613
ENSMUSG00000008855	Hdac5	34	0.0203194	0.991256	0.033831	0.802216	0.048721	0.202813	0.0137159	0.798784
ENSMUSG00000008855	Hdac5	35	-0.264292	0.728764	-0.258071	0.37917	-0.00394214	0.812833	-0.091525	0.107581
ENSMUSG00000008855	Hdac5	36	-0.556443	0.429413	-0.553829	0.227949	0.010534	0.898713	-0.0862416	0.111085
ENSMUSG00000008855	Hdac5	37	-0.10749	0.905528	-0.0962389	0.742091	0.200958	0.0219769	0.142497	0.108964
ENSMUSG00000008855	Hdac5	38	-0.542525	0.103029	-0.526297	0.157882	0.168625	0.0379393	0.218982	0.051145
ENSMUSG00000008855	Hdac5	39	0.469377	0.353653	0.476514	0.287925	0.00392073	0.927754	0.0575865	0.296578
ENSMUSG00000008855	Hdac5	40	0.98722	0.000569855	1.0032	0.000232439	0.119207	0.324203	0.258459	0.0586399
ENSMUSG00000008855	Hdac5	41	0.235708	0.680813	0.246702	0.31018	0.0824657	0.138824	0.0375376	0.0360534
ENSMUSG00000008855	Hdac5	42	0.221174	0.81497	0.231757	0.262712	0.13769	0.0173931	0.0701951	0.315427
ENSMUSG00000008855	Hdac5	43	0.648659	0.121904	0.663145	0.0328301	0.16057	0.0419739	0.121543	0.0119424
ENSMUSG00000008855	Hdac5	44	0.291691	0.658266	0.301153	0.299195	0.19711	0.0274107	0.167259	0.0146799
ENSMUSG00000008855	Hdac5	45	0.476881	0.208516	0.490046	0.0703924	0.0936486	0.0483152	0.142644	0.0224558
ENSMUSG00000008855	Hdac5	46	0.14451	0.786344	0.160593	0.00845888	0.185111	0.00493562	0.122389	0.00548947
ENSMUSG00000008855	Hdac5	47	-0.54864	0.466299	-0.561931	0.360253	-0.194724	0.0207036	-0.108372	0.113174
ENSMUSG00000008855	Hdac5	48	-0.406611	0.483092	-0.401575	0.242129	-0.166421	0.0566413	-0.144179	0.0938592
ENSMUSG00000008855	Hdac5	49	-0.160475	0.743372	-0.144943	0.0751858	-0.0407051	0.370968	-0.0320921	0.41614
ENSMUSG00000008855	Hdac5	50	0.111674	0.832067	0.126753	0.57641	-0.107411	0.0096775	-0.0866797	0.21425
ENSMUSG00000008855	Hdac5	51	0.593972	0.0763468	0.605537	0.150435	0.074373	0.100944	0.0109641	0.885321
ENSMUSG00000008855	Hdac5	52	0.0397672	0.959447	0.0551143	0.906418	0.00418093	0.921388	-0.0416465	0.0702678
ENSMUSG00000008855	Hdac5	53	0.302471	0.369295	0.318551	0.00572628	-0.0554973	0.216362	-0.0469605	0.362405
ENSMUSG00000008855	Hdac5	54	-0.0176631	0.987133	-0.000749643	0.997465	0.073867	0.0983086	-0.0271692	0.440781
ENSMUSG00000008855	Hdac5	55	-0.357447	0.331925	-0.341236	0.010206	-0.281632	0.063625	-0.166355	0.283764
ENSMUSG00000009073	Nf2	1	0.486454	0.342322	0.499937	0.30704	0.200587	0.015883	0.118889	0.109898
ENSMUSG00000009073	Nf2	2	-0.0032205	0.998697	0.0129051	0.942092	0.0635702	0.340307	0.0372677	0.438594
ENSMUSG00000009073	Nf2	3	0.364132	0.369295	0.378925	0.0318062	0.105454	0.0470107	0.116045	0.0243945
ENSMUSG00000009073	Nf2	4	0.54729	0.114832	0.560853	0.0637378	0.120523	0.0198429	0.0840901	0.204317
ENSMUSG00000009073	Nf2	5	0.410453	0.167134	0.425586	0.0280317	0.0852541	0.250499	0.0546189	0.196082
ENSMUSG00000009073	Nf2	6	0.216346	0.522667	0.231626	0.0962538	-1.09161	0.0208732	-0.832927	0.00297846
ENSMUSG00000009073	Nf2	7	0.314346	0.259747	0.32996	0.105804	-2.45817	0.0115426	-1.86241	0.00710276
ENSMUSG00000009073	Nf2	8	0.635694	0.00943699	0.650914	0.0827888	-3.8215	0.00879882	-2.8828	0.0018467
ENSMUSG00000009073	Nf2	9	0.926705	0.000272446	0.94262	0.00415344	-3.13173	0.0384217	-2.07977	0.00522568
ENSMUSG00000009073	Nf2	10	0.926894	0.000761389	0.943687	0.0103831	-2.46141	0.0319531	-1.82865	0.0237345
ENSMUSG00000009073	Nf2	11	-0.00161907	0.998697	0.0105819	0.952324	-1.35506	0.0189685	-0.993113	0.0112181
ENSMUSG00000009073	Nf2	12	0.190832	0.77797	0.203219	0.570353	0.104287	0.0590378	0.0684244	0.258282
ENSMUSG00000009073	Nf2	13	0.311801	0.686957	0.316523	0.539414	0.0300793	0.415014	-0.0342711	0.384018
ENSMUSG00000009073	Nf2	14	0.158033	0.798982	0.171085	0.340908	-0.0157492	0.282676	0.052863	0.40069
ENSMUSG00000009073	Nf2	15	-0.0302167	0.970285	-0.0170845	0.957053	0.167439	0.028759	0.119199	0.0107175
ENSMUSG00000009073	Nf2	16	0.345839	0.567829	0.367069	0.215481	0.247298	0.0157415	0.241062	0.0127613
ENSMUSG00000009073	Nf2	17	-0.140054	0.868475	-0.12876	0.639116	-0.17133	0.0339369	-0.134194	0.0418523
ENSMUSG00000009073	Nf2	18	-0.22832	0.726038	-0.204536	0.641821	0.0110952	0.737629	0.0625474	0.218916
ENSMUSG00000009073	Nf2	19	0.479245	0.418167	0.499792	0.344881	-0.170626	0.0593594	-0.123272	0.104141
ENSMUSG00000009073	Nf2	20	-0.105818	0.901526	-0.0888741	0.72219	0.0587055	0.138173	0.102891	0.114375
ENSMUSG00000009073	Nf2	21	0.171831	0.791461	0.185408	0.307275	0.00825237	0.870346	-0.0400882	0.0260696
ENSMUSG00000009073	Nf2	22	-0.08657	0.932272	-0.0761044	0.72739	0.146371	0.0107759	0.2111	0.0243104
ENSMUSG00000009073	Nf2	23	0.356376	0.58909	0.373277	0.0905793	0.485156	0.00965981	0.332987	0.10015
ENSMUSG00000009073	Nf2	24	0.466871	0.357382	0.48071	0.0820466	0.330121	0.0126485	0.323448	0.00905557
ENSMUSG00000009073	Nf2	25	0.106438	0.931674	0.120682	0.827066	0.268367	0.0093042	0.139279	0.032863
ENSMUSG00000009073	Nf2	26	0.317293	0.726998	0.298069	0.640068	0.134576	0.0280708	-0.0295237	0.686069
ENSMUSG00000009073	Nf2	27	0.351917	0.510526	0.363663	0.265645	0.170483	0.0611331	0.139737	0.2189
ENSMUSG00000009073	Nf2	28	0.171209	0.753203	0.182739	0.4988	0.173968	0.00553466	0.14136	0.0410862
ENSMUSG00000009073	Nf2	29	0.147181	0.874553	0.142221	0.801589	-0.0301175	0.166252	-0.0487858	0.497691
ENSMUSG00000009073	Nf2	30	-0.084412	0.884919	-0.0709079	0.648763	-0.143918	0.0325476	-0.111227	0.0742009
ENSMUSG00000009073	Nf2	31	0.316774	0.314647	0.33218	0.0368744	-0.196249	0.0402971	-0.119293	0.00104933
ENSMUSG00000009073	Nf2	32	0.484947	0.0701833	0.49994	0.0569797	-0.147822	0.0513306	-0.0889911	0.141811
ENSMUSG00000009073	Nf2	33	0.212683	0.603031	0.22782	0.0573375	0.0273902	0.420924	0.0912799	0.224944
ENSMUSG00000009073	Nf2	34	0.106502	0.830666	0.123121	0.475936	-0.0258009	0.0430537	-0.0709265	0.522165
ENSMUSG00000009073	Nf2	35	-0.124623	0.809986	-0.111638	0.535712	-0.190279	0.104464	-0.15195	0.0726016
ENSMUSG00000009073	Nf2	36	-0.066089	0.924946	-0.0508082	0.775952	-0.0285092	0.390242	-0.01984	0.674848
ENSMUSG00000009073	Nf2	37	-0.0551171	0.943774	-0.0402109	0.557546	0.0359038	0.411157	-0.0218304	0.563502
ENSMUSG00000009073	Nf2	38	0.301611	0.503871	0.318191	0.132448	0.101555	0.166936	0.0639071	0.138534
ENSMUSG00000009073	Nf2	39	0.758817	0.0986954	0.775803	0.0272426	0.219049	0.0526409	0.151811	0.00540696
ENSMUSG00000009073	Nf2	40	0.225181	0.758104	0.23117	0.565673	0.144838	0.0174683	0.141086	0.276057
ENSMUSG00000009073	Nf2	41	0.446092	0.184252	0.460254	0.0537688	0.244368	0.00570086	0.204901	0.0146051
ENSMUSG00000009073	Nf2	42	0.505229	0.275321	0.515481	0.203904	0.242131	0.0119497	0.195055	0.0570921
ENSMUSG00000009073	Nf2	43	-0.521358	0.328882	-0.52211	0.315574	-0.0920089	0.180396	0.0218614	0.711181
ENSMUSG00000009073	Nf2	44	-0.432048	0.332138	-0.419914	0.0774014	-0.131426	0.139337	-0.0651979	0.113106
ENSMUSG00000009073	Nf2	45	-0.180529	0.852095	-0.168086	0.401802	-0.0854227	0.222576	-0.074717	0.063428
ENSMUSG00000009073	Nf2	46	-0.379495	0.529173	-0.371981	0.253788	-0.00722578	0.924015	-0.0358059	0.405891
ENSMUSG00000009073	Nf2	47	0.12006	0.849352	0.13329	0.513842	0.0351587	0.353919	0.0439578	0.536382
ENSMUSG00000009073	Nf2	48	0.306719	0.451873	0.32224	0.168569	0.191252	0.00759265	0.15675	0.0249038
ENSMUSG00000009073	Nf2	49	0.587966	0.0638436	0.6039	0.0346249	0.229206	0.0104843	0.215027	0.0363759
ENSMUSG00000009073	Nf2	50	0.121858	0.840081	0.135914	0.24493	0.184757	0.0859377	0.195173	0.0141558
ENSMUSG00000009073	Nf2	51	0.16324	0.758593	0.178034	0.366571	0.197311	0.0142264	0.104424	0.0084488
ENSMUSG00000009073	Nf2	52	0.505919	0.225134	0.519487	0.099091	0.0567922	0.371999	0.0687481	0.138278
ENSMUSG00000009073	Nf2	53	0.00785286	0.997202	0.0225801	0.691136	-0.0876465	0.174644	-0.0966221	0.0599296
ENSMUSG00000009073	Nf2	54	-0.0573201	0.935704	-0.0423784	0.751978	-0.236078	0.001907	-0.0686305	0.161573
ENSMUSG00000009073	Nf2	55	0.552961	0.144354	0.569237	0.122036	-0.0223984	0.650488	-0.0519467	0.0706472
ENSMUSG00000009073	Nf2	56	0.111115	0.885441	0.123096	0.653688	-0.0946673	0.151756	-0.123965	0.046196
ENSMUSG00000009073	Nf2	57	-0.376736	0.405545	-0.359364	0.250605	-0.0495988	0.320027	-0.10727	0.0544857
ENSMUSG00000009073	Nf2	58	0.180177	0.725731	0.194893	0.295851	-0.0791163	0.191025	-0.0570361	0.16535
ENSMUSG00000009073	Nf2	59	-0.138119	0.81497	-0.121199	0.199261	0.0141703	0.788363	-0.000678673	0.973701
ENSMUSG00000009073	Nf2	60	-0.0102645	0.992504	0.00612024	0.955696	-0.08863	0.258354	-0.0563977	0.704446
ENSMUSG00000009073	Nf2	61	-0.0353996	0.957722	-0.0202257	0.74977	0.149711	0.0560644	0.00402686	0.956705
ENSMUSG00000009073	Nf2	62	-0.0644918	0.930317	-0.04826	0.137148	0.0743858	0.167966	0.0369106	0.351505
ENSMUSG00000009073	Nf2	63	0.169758	0.808774	0.185762	0.024169	0.164763	0.100858	0.160968	0.0296084
ENSMUSG00000009073	Nf2	64	0.15968	0.827383	0.176127	0.215714	0.204216	0.010118	0.112735	0.227695
ENSMUSG00000009073	Nf2	65	0.108208	0.869171	0.126172	0.209222	0.239283	0.000317062	0.221557	0.00331237
ENSMUSG00000009073	Nf2	66	0.3079	0.734066	0.313088	0.514847	0.0164176	0.718395	0.339739	0.00490054
ENSMUSG00000009073	Nf2	67	0.389731	0.516386	0.398768	0.229585	0.146811	0.181902	0.162093	0.0714283
ENSMUSG00000009073	Nf2	68	0.260063	0.597282	0.273295	0.239996	-0.147454	0.00705415	-0.0801881	0.140103
ENSMUSG00000009073	Nf2	69	-0.563	0.259528	-0.549533	0.133169	0.0594993	0.517172	0.051653	0.161047
ENSMUSG00000009073	Nf2	70	-0.582594	0.0901966	-0.567886	0.0233675	-0.112257	0.0631876	-0.0105134	0.485198
ENSMUSG00000009073	Nf2	71	-1.54896	1.99e-08	-1.53383	0.000746371	0.0271333	0.233756	0.00861054	0.860885
ENSMUSG00000009073	Nf2	72	-0.256667	0.643934	-0.241177	0.275263	-0.0267053	0.534232	-0.0807865	0.173359
ENSMUSG00000009073	Nf2	73	-0.2195	0.685242	-0.202452	0.361243	-0.131728	0.052444	-0.102809	0.349764
ENSMUSG00000009073	Nf2	74	-0.0571683	0.937802	-0.0436074	0.723773	-0.175666	0.00534711	-0.123159	0.0896323
ENSMUSG00000009073	Nf2	75	0.394427	0.264094	0.410129	0.0101002	0.17617	0.00196	0.0969289	0.00359465
ENSMUSG00000009073	Nf2	76	0.193993	0.692148	0.210973	0.175041	0.171858	0.0248824	0.0353544	0.0888762
ENSMUSG00000009073	Nf2	77	0.327616	0.460686	0.341666	0.0850611	0.0415654	0.368903	-0.0384977	0.537354
ENSMUSG00000009073	Nf2	78	0.460958	0.241926	0.475962	0.064061	0.0891181	0.0933903	0.13263	0.210187
ENSMUSG00000009073	Nf2	79	0.301596	0.41358	0.316169	0.0813173	0.114366	0.0663861	0.112644	0.0404156
ENSMUSG00000009073	Nf2	80	0.00193188	0.998697	0.0167749	0.870847	-0.0375602	0.364317	-0.0587106	0.201617
ENSMUSG00000009073	Nf2	81	0.0325585	0.959447	0.0490502	0.649371	-0.105308	0.0946142	-0.093053	0.0876829
ENSMUSG00000009073	Nf2	82	0.328544	0.479101	0.340394	0.359247	0.00861436	0.813177	0.0859624	0.0686747
ENSMUSG00000009073	Nf2	83	0.314169	0.501566	0.327122	0.179119	0.199562	0.0454804	0.137232	0.180712
ENSMUSG00000009073	Nf2	84	0.451351	0.241398	0.465572	0.0248874	0.101018	0.0539147	0.0402315	0.777032
ENSMUSG00000009073	Nf2	85	0.512573	0.107857	0.527896	0.0395116	0.0981323	0.0140734	0.114355	0.108323
ENSMUSG00000009073	Nf2	86	0.178708	0.735871	0.193526	0.0733973	0.0834299	0.352863	0.0622792	0.0785243
ENSMUSG00000009073	Nf2	87	0.504215	0.158046	0.520549	0.0142972	0.0852148	0.050077	0.0251873	0.333147
ENSMUSG00000009073	Nf2	88	-0.0377028	0.96144	-0.023384	0.930369	-0.150028	0.0303299	-0.0971066	0.033559
ENSMUSG00000009073	Nf2	89	-0.508256	0.287695	-0.49188	0.00132125	-0.401097	0.0385977	-0.303023	0.00130479
ENSMUSG00000009073	Nf2	90	-0.16019	0.838578	-0.140898	0.772366	0.0206337	0.550563	0.00702845	0.7075
ENSMUSG00000009073	Nf2	91	-0.602697	0.136978	-0.588448	0.213278	-0.0355966	0.600446	0.0768321	0.610229
ENSMUSG00000009073	Nf2	92	-0.110647	0.904599	-0.0940851	0.833786	-0.000711662	0.907286	-0.102626	0.387945
ENSMUSG00000013076	Amotl1	1	0.210419	0.825032	0.212566	0.66138	-0.0112279	0.876589	-0.0990292	0.00880349
ENSMUSG00000013076	Amotl1	2	-1.11705	0.0879456	-1.11065	0.00900399	0.111655	0.0862528	0.161137	0.0326788
ENSMUSG00000013076	Amotl1	3	0.0884588	0.89431	0.10495	0.404872	0.0101416	0.884149	0.0918839	0.0109518
ENSMUSG00000013076	Amotl1	4	-0.456155	0.402965	-0.442989	0.199712	-0.0886411	0.328772	0.0575118	0.216166
ENSMUSG00000013076	Amotl1	5	0.165757	0.882602	0.180863	0.772926	0.347044	0.00986109	0.382471	0.0257097
ENSMUSG00000013076	Amotl1	6	0.501088	0.40602	0.513327	0.195659	0.28743	0.00300392	0.198214	0.0952627
ENSMUSG00000013076	Amotl1	7	0.0191599	0.986599	0.0363957	0.814921	0.0929425	0.123594	0.00346467	0.905018
ENSMUSG00000013076	Amotl1	8	-0.284303	0.659423	-0.278876	0.468772	-0.0193851	0.358706	-0.0110135	0.796109
ENSMUSG00000013076	Amotl1	9	-0.00398919	0.998697	0.0101791	0.976536	0.0974242	0.0605821	0.0663332	0.0694289
ENSMUSG00000013076	Amotl1	10	0.0546114	0.937802	0.0711123	0.628635	0.00336168	0.879478	-0.00211119	0.96169
ENSMUSG00000013076	Amotl1	11	-0.037823	0.963619	-0.021735	0.684063	-0.146408	0.0221843	-0.329789	0.00593699
ENSMUSG00000013076	Amotl1	12	0.0470324	0.947684	0.0618426	0.729786	0.0733295	0.176081	-0.0789641	0.0346177
ENSMUSG00000013076	Amotl1	13	-0.589811	0.26227	-0.589284	0.246574	-0.158077	0.123323	-0.224227	0.0100066
ENSMUSG00000013076	Amotl1	14	-0.52452	0.460686	-0.517891	0.281389	-0.357051	0.00241369	-0.0747874	0.507179
ENSMUSG00000013076	Amotl1	15	-1.11256	0.587644	-1.23908	0.413942	-0.259571	0.113733	-0.110867	0.558038
ENSMUSG00000013076	Amotl1	16	1.12922	0.77797	0	NA	NA	NA	NA	NA
ENSMUSG00000013076	Amotl1	17	1.40118	0.0272697	1.41344	0.0583016	-0.317959	0.228704	0.501392	0.143302
ENSMUSG00000013076	Amotl1	18	-0.423212	0.243895	-0.409289	0.117812	-0.0986372	0.0804741	-0.0154757	0.75507
ENSMUSG00000013076	Amotl1	19	-0.437127	0.248705	-0.420697	0.0480606	-0.126383	0.0345801	-0.158337	0.0526238
ENSMUSG00000013076	Amotl1	20	-0.51555	0.109808	-0.500705	0.0377291	-0.160753	0.0391991	-0.132794	0.0676078
ENSMUSG00000013076	Amotl1	21	-0.249232	0.594277	-0.232843	0.0726803	-0.0933401	0.140248	-0.149766	0.0994414
ENSMUSG00000013076	Amotl1	22	0.0583362	0.930317	0.0717412	0.712265	-0.0113886	0.782524	-0.0965693	0.0583484
ENSMUSG00000013076	Amotl1	23	0.392975	0.398669	0.403832	0.268044	0.0816624	0.0701473	-0.0105925	0.737572
ENSMUSG00000013076	Amotl1	24	-0.0886991	0.869171	-0.0736873	0.259524	-0.166417	0.0839448	-0.1049	0.216884
ENSMUSG00000013076	Amotl1	25	0.0925854	0.843682	0.107848	0.404237	-0.0701723	0.0264346	-0.0283294	0.570553
ENSMUSG00000013076	Amotl1	26	-0.12535	0.818503	-0.112829	0.670292	0.0502008	0.612434	0.110642	0.255467
ENSMUSG00000013076	Amotl1	27	0.00631659	0.998222	0.0230588	0.856249	-0.338977	0.0512796	-0.0844624	0.569407
ENSMUSG00000013076	Amotl1	28	-0.199968	0.652211	-0.185761	0.172202	-0.0458707	0.328341	-0.0475038	0.0328062
ENSMUSG00000013076	Amotl1	29	-1.10952	0.00145881	-1.09645	0.00495803	-0.403484	0.0253394	-0.248379	0.0821444
ENSMUSG00000013076	Amotl1	30	-0.386779	0.415631	-0.373971	0.265026	-0.385236	0.00343061	-0.276848	0.00240526
ENSMUSG00000013076	Amotl1	31	-0.27226	0.65256	-0.267617	0.484534	-0.355486	0.0232427	-0.309122	0.0191333
ENSMUSG00000013076	Amotl1	32	0.204041	0.640739	0.219305	0.1356	0.165671	0.0783298	0.0786672	0.15662
ENSMUSG00000013076	Amotl1	33	0.257857	0.524912	0.273975	0.0958702	0.176986	0.0409199	0.159024	0.0240347
ENSMUSG00000013076	Amotl1	34	0.114871	0.833498	0.130998	0.0891447	0.102497	0.242007	0.00659652	0.291353
ENSMUSG00000013076	Amotl1	35	0.149133	0.80674	0.162836	0.384609	0.0209755	0.181845	0.0383345	0.566986
ENSMUSG00000013076	Amotl1	36	0.00487738	0.998697	0.0166111	0.931618	0.0327217	0.507682	0.0161369	0.650044
ENSMUSG00000013076	Amotl1	37	-0.0820061	0.90201	-0.0651507	0.270108	-0.0923131	0.0163642	-0.0242033	0.582518
ENSMUSG00000013076	Amotl1	38	0.0713094	0.917954	0.0849818	0.605572	0.110111	0.0106393	0.0686279	0.240466
ENSMUSG00000013076	Amotl1	39	0.375712	0.400101	0.391967	0.197402	0.070109	0.30177	0.0399334	0.475127
ENSMUSG00000013076	Amotl1	40	-0.0107525	0.993126	0.0056147	0.859431	-0.0607303	0.346218	-0.028726	0.423961
ENSMUSG00000013076	Amotl1	41	0.339238	0.324892	0.353423	0.112971	-0.00532019	0.872025	-0.00710666	0.811153
ENSMUSG00000013076	Amotl1	42	-0.0668015	0.919224	-0.0520342	0.449084	-0.122233	0.0482589	-0.220248	0.0950432
ENSMUSG00000013076	Amotl1	43	0.239376	0.571192	0.253751	0.122995	-0.162116	0.0025917	-0.0343679	0.36932
ENSMUSG00000013076	Amotl1	44	0.3557	0.436477	0.373032	0.142173	-0.0585231	0.0995258	-0.0815768	0.323408
ENSMUSG00000013076	Amotl1	45	0.0417485	0.94954	0.0552011	0.765221	-0.029831	0.43071	-0.104158	0.107861
ENSMUSG00000013076	Amotl1	46	0.11747	0.811118	0.134	0.239163	0.0345452	0.463899	0.0435657	0.341232
ENSMUSG00000013076	Amotl1	47	0.216031	0.798982	0.233919	0.531004	0.249574	0.0427847	0.14065	0.0200641
ENSMUSG00000013076	Amotl1	48	-0.0772222	0.940501	-0.0702899	0.802666	0.344178	0.0722009	0.162729	0.138733
ENSMUSG00000013076	Amotl1	49	0.271672	0.538816	0.287548	0.0045169	0.164327	0.00169123	0.200987	0.00920357
ENSMUSG00000013076	Amotl1	50	0.171552	0.820821	0.185714	0.342861	0.153113	0.0398958	0.0253354	0.648088
ENSMUSG00000013076	Amotl1	51	0.330556	0.540545	0.343848	0.285733	0.237772	0.0166603	0.137636	0.0269351
ENSMUSG00000013076	Amotl1	52	0.134171	0.878952	0.15141	0.553348	0.0872935	0.0361856	0.051831	0.283921
ENSMUSG00000013076	Amotl1	53	0.316921	0.707827	0.310662	0.526815	0.164084	0.0550938	0.0860789	0.045694
ENSMUSG00000013076	Amotl1	54	0.227407	0.714511	0.2449	0.257841	-0.0394781	0.446453	0.0360631	0.109951
ENSMUSG00000013076	Amotl1	55	-0.626713	0.379169	-0.633505	0.26173	-0.0802155	0.692928	0.118002	0.250699
ENSMUSG00000013076	Amotl1	56	-0.00117568	0.998697	0.0151589	0.869856	-0.0730044	0.00262099	-0.0322456	0.567084
ENSMUSG00000013076	Amotl1	57	-0.250952	0.699677	-0.246967	0.461484	-0.221523	0.0215501	-0.223265	0.086736
ENSMUSG00000013076	Amotl1	58	0.189577	0.818288	0.203904	0.492114	0.00288602	0.953892	0.0284501	0.767777
ENSMUSG00000013076	Amotl1	59	-0.352525	0.479101	-0.342055	0.203445	0.142098	0.00535343	-0.02213	0.475328
ENSMUSG00000013076	Amotl1	60	0.210905	0.809986	0.224939	0.51489	0.198014	0.0182809	0.126738	0.0869336
ENSMUSG00000013076	Amotl1	61	-0.221889	0.833498	-0.219105	0.621646	0.00253748	0.951571	-0.012663	0.88092
ENSMUSG00000013076	Amotl1	62	-0.503345	0.482187	-0.4983	0.390679	-0.02453	0.60164	-0.0288269	0.697762
ENSMUSG00000013076	Amotl1	63	-0.0558968	0.949495	-0.0383672	0.863826	-0.124246	0.0956881	-0.00650493	0.919747
ENSMUSG00000013076	Amotl1	64	0.413275	0.431639	0.429321	0.251585	0.376212	0.00986957	0.264679	0.011023
ENSMUSG00000013076	Amotl1	65	0.128324	0.873281	0.136471	0.713928	0.227932	0.0375558	0.139257	0.0975634
ENSMUSG00000013076	Amotl1	66	0.174556	0.8252	0.184361	0.588123	0.108154	0.110917	0.0175688	0.498311
ENSMUSG00000013076	Amotl1	67	0.00279888	0.998697	0.016248	0.910105	0.152097	0.0220645	0.0624718	0.322538
ENSMUSG00000013076	Amotl1	68	-0.145332	0.793298	-0.132904	0.495938	-0.0468512	0.304767	-0.0790681	0.180305
ENSMUSG00000013076	Amotl1	69	0.373022	0.253376	0.38873	0.0492431	-0.0952063	0.136899	-0.144442	0.104786
ENSMUSG00000013076	Amotl1	70	-0.0657673	0.942032	-0.0526072	0.90761	-0.0683529	0.361796	-0.130078	0.0998493
ENSMUSG00000013076	Amotl1	71	-0.339254	0.473921	-0.323214	0.352568	0.0199786	0.13732	-0.112588	0.0729747
ENSMUSG00000013076	Amotl1	72	0.106686	0.916774	0.118527	0.730201	0.39312	0.00674853	0.240317	0.0247304
ENSMUSG00000013076	Amotl1	73	0.188048	0.808071	0.213403	0.706051	-0.0861728	0.132733	-0.0617733	0.322684
ENSMUSG00000013076	Amotl1	74	-0.402955	0.52607	-0.385325	0.166753	-0.0745223	0.0435414	-0.0344056	0.58341
ENSMUSG00000013076	Amotl1	75	-0.384549	0.304139	-0.368063	0.136326	-0.0775785	0.130584	-0.0792739	0.528801
ENSMUSG00000013076	Amotl1	76	-0.216036	0.696507	-0.200948	0.0829307	-0.0976754	0.233957	0.0626304	0.64166
ENSMUSG00000013076	Amotl1	77	-0.371642	0.560727	-0.357238	0.273635	-0.0329928	0.603041	0.0537354	0.688357
ENSMUSG00000013076	Amotl1	78	-0.656216	0.0447608	-0.639098	0.0365066	0.0695812	0.129655	0.0199192	0.593623
ENSMUSG00000013076	Amotl1	79	-0.36119	0.483087	-0.345992	0.125108	0.0695385	0.296775	-0.00905205	0.772761
ENSMUSG00000013076	Amotl1	80	0.106197	0.87105	0.117059	0.604413	0.204307	0.00370569	0.129998	0.0537465
ENSMUSG00000013076	Amotl1	81	-0.145946	0.849692	-0.141556	0.651925	-0.139294	0.0984462	-0.127852	0.0358228
ENSMUSG00000013076	Amotl1	82	0.22564	0.665175	0.242953	0.157046	0.130424	0.147998	0.0325199	0.681371
ENSMUSG00000013076	Amotl1	83	-0.27955	0.62437	-0.270275	0.353469	-0.0672766	0.501784	0.00253677	0.973732
ENSMUSG00000013076	Amotl1	84	0.175075	0.714384	0.189762	0.180922	0.147633	0.0367978	0.1361	0.0569653
ENSMUSG00000013076	Amotl1	85	-0.0473753	0.943774	-0.0316734	0.560131	0.0449704	0.108334	0.103271	0.220122
ENSMUSG00000013076	Amotl1	86	-0.00152356	0.998697	0.0141076	0.935699	-0.0858144	0.262291	-0.147453	0.0962557
ENSMUSG00000013076	Amotl1	87	-0.161216	0.807763	-0.149409	0.385065	-0.178922	0.0917285	-0.0952963	0.323768
ENSMUSG00000013076	Amotl1	88	-0.324798	0.627067	-0.315084	0.19952	0.0504514	0.535835	0.0244078	0.288603
ENSMUSG00000013076	Amotl1	89	0.173879	0.798943	0.188684	0.0776152	0.148479	0.194656	0.0751094	0.264178
ENSMUSG00000013076	Amotl1	90	0.0982228	0.880656	0.110685	0.615077	-0.00968788	0.848508	-0.0225826	0.266386
ENSMUSG00000013076	Amotl1	91	-0.163794	0.809986	-0.154992	0.62244	0.140567	0.0419166	0.112735	0.176464
ENSMUSG00000013076	Amotl1	92	-0.840408	0.179374	-0.827588	0.0971006	-0.397556	0.0159868	-0.165855	0.166713
ENSMUSG00000013076	Amotl1	93	0.323232	0.460919	0.33701	0.166697	0.0370709	0.44419	-0.117934	0.0479989
ENSMUSG00000013076	Amotl1	94	0.055715	0.947914	0.0608191	0.875674	-0.0486802	0.128332	-0.0642282	0.0187267
ENSMUSG00000013076	Amotl1	95	-1.1135	0.00326343	-1.09503	0.136967	-0.112377	0.0814622	-0.102388	0.229238
ENSMUSG00000013076	Amotl1	96	-0.34601	0.516386	-0.331352	0.350879	-0.102446	0.381209	-0.0731329	0.590903
ENSMUSG00000013076	Amotl1	97	-0.186419	0.726345	-0.172822	0.240249	0.0798844	0.124935	0.102995	0.0357158
ENSMUSG00000013076	Amotl1	98	0.401713	0.428135	0.416141	0.233294	0.0644965	0.379829	0.107908	0.0192525
ENSMUSG00000013076	Amotl1	99	0.348414	0.460686	0.364874	0.00772995	0.266219	0.0176914	0.161777	0.0021139
ENSMUSG00000013076	Amotl1	100	0.261149	0.702598	0.277902	0.45016	0.124326	0.151064	0.109607	0.0898249
ENSMUSG00000013076	Amotl1	101	0.078794	0.905528	0.0939658	0.369186	0.0223456	0.471512	-0.0451204	0.0766998
ENSMUSG00000013076	Amotl1	102	-0.391657	0.43362	-0.37691	0.226071	-0.135015	0.132432	-0.104399	0.0342976
ENSMUSG00000013076	Amotl1	103	-0.143691	0.846403	-0.129455	0.334759	-0.0419838	0.219171	-0.10004	0.150766
ENSMUSG00000013076	Amotl1	104	-0.231782	0.685242	-0.218914	0.553014	0.0836462	0.137576	0.0357289	0.126966
ENSMUSG00000013076	Amotl1	105	-0.0760128	0.940478	-0.0667616	0.889928	0.0156149	0.637442	-0.016328	0.15053
ENSMUSG00000013076	Amotl1	106	-0.0885234	0.943835	-0.105023	0.868031	0.0790484	0.00804411	0.00937692	0.870906
ENSMUSG00000013076	Amotl1	107	0.328158	0.536455	0.339088	0.288399	0.0662732	0.219426	0.03059	0.456739
ENSMUSG00000013076	Amotl1	108	0.340235	0.463164	0.356024	0.13612	0.0438953	0.374652	0.0541981	0.49302
ENSMUSG00000013076	Amotl1	109	0.413919	0.334177	0.42914	0.0933332	0.045087	0.555705	-0.0187532	0.687975
ENSMUSG00000013076	Amotl1	110	0.270276	0.544218	0.285622	0.0121835	0.0479052	0.050114	0.0823542	0.311075
ENSMUSG00000013076	Amotl1	111	0.263504	0.692148	0.280681	0.0536239	0.695181	0.036086	0.458919	0.0176525
ENSMUSG00000013076	Amotl1	112	-0.625742	0.223077	-0.613998	0.0756808	0.571683	0.107448	0.659299	0.0218802
ENSMUSG00000013076	Amotl1	113	-0.0925263	0.924946	-0.0781678	0.733402	0.640385	0.0822302	0.58843	0.0813676
ENSMUSG00000013076	Amotl1	114	-0.144691	0.81497	-0.128721	0.474447	-0.0602743	0.660311	0.0940091	0.60674
ENSMUSG00000013076	Amotl1	115	-0.388944	0.372445	-0.372617	0.143928	0.0453437	0.389182	-0.0141495	0.411365
ENSMUSG00000013076	Amotl1	116	-0.326922	0.685242	-0.322799	0.537711	0.258888	0.0297219	0.140983	0.00919123
ENSMUSG00000013076	Amotl1	117	-0.292101	0.692148	-0.287025	0.37309	0.0955144	0.46561	0.0145593	0.754586
ENSMUSG00000013076	Amotl1	118	-0.322318	0.619689	-0.318068	0.416357	-0.108724	0.0282517	-0.118987	0.0338781
ENSMUSG00000013076	Amotl1	119	0.496141	0.459708	0.491106	0.451147	0.0865483	0.197727	0.0115649	0.831758
ENSMUSG00000013076	Amotl1	120	0.0359055	0.961846	0.0472218	0.854737	-0.0535951	0.229447	-0.11614	0.157541
ENSMUSG00000013076	Amotl1	121	0.0492241	0.942536	0.063782	0.634508	-0.0330462	0.477466	-0.0422954	0.265406
ENSMUSG00000013076	Amotl1	122	-0.613242	0.0904879	-0.598082	0.0886573	-0.349127	0.0477251	-0.24744	0.0416193
ENSMUSG00000013076	Amotl1	123	-0.160947	0.807763	-0.147587	0.524	-0.204462	0.0666723	-0.144326	0.313067
ENSMUSG00000013076	Amotl1	124	0.167319	0.80478	0.183166	0.55048	-0.21019	0.0843227	-0.0605495	0.65191
ENSMUSG00000013076	Amotl1	125	-0.912802	0.0177383	-0.907517	0.0607193	-0.288801	0.0675026	-0.110576	0.454773
ENSMUSG00000013076	Amotl1	126	-0.386682	0.426983	-0.370441	0.19279	-0.127623	0.143399	-0.133886	0.185073
ENSMUSG00000013076	Amotl1	127	-0.549549	0.231177	-0.542445	0.233152	-0.0821077	0.202003	-0.112762	0.176251
ENSMUSG00000013076	Amotl1	128	-0.521233	0.472128	-0.509268	0.22972	-0.128608	0.0692403	-0.153526	0.0553268
ENSMUSG00000013076	Amotl1	129	0.577312	0.107151	0.590415	0.032666	-0.00982601	0.576331	-0.0754805	0.0332759
ENSMUSG00000013076	Amotl1	130	0.682212	0.221429	0.679578	0.38198	0.0439562	0.259793	0.00377168	0.914199
ENSMUSG00000013076	Amotl1	131	0.138708	0.924946	0.143533	0.706848	-0.119452	0.201436	-0.166579	0.0101736
ENSMUSG00000013076	Amotl1	132	-0.402913	0.536455	-0.410762	0.472422	-0.0403149	0.192724	-0.114655	7.56e-06
ENSMUSG00000013076	Amotl1	133	-0.525806	0.153496	-0.512103	0.0854949	0.0317725	0.708613	-0.0352376	0.424323
ENSMUSG00000013076	Amotl1	134	-1.31361	0.024138	-1.33699	0.0916648	-0.311063	0.0508376	-0.234704	0.104263
ENSMUSG00000013076	Amotl1	135	-0.138284	0.807763	-0.123437	0.201874	-0.0136279	0.554657	-0.000815871	0.982645
ENSMUSG00000013076	Amotl1	136	-0.0878119	0.903324	-0.0713545	0.48169	0.137397	0.0073836	0.0158548	0.830598
ENSMUSG00000013076	Amotl1	137	-0.502354	0.311688	-0.489474	0.21158	-0.411465	0.0178889	-0.428131	0.0344499
ENSMUSG00000013076	Amotl1	138	-0.0421452	0.948656	-0.0270072	0.561578	-0.0284392	0.169229	-0.0165628	0.561014
ENSMUSG00000013076	Amotl1	139	-0.182545	0.757148	-0.167983	0.207612	-0.285216	0.0435403	-0.206446	0.0626211
ENSMUSG00000013076	Amotl1	140	0.290936	0.572886	0.303192	0.319379	0.0483352	0.183465	-0.0505878	0.104334
ENSMUSG00000013076	Amotl1	141	0.242995	0.654572	0.2599	0.161024	-0.0710546	0.166983	-0.0481359	0.100054
ENSMUSG00000013076	Amotl1	142	0.0303195	0.979302	0.056645	0.917779	0.104348	0.0865281	0.0849577	0.240734
ENSMUSG00000013076	Amotl1	143	-0.271566	0.793298	-0.246921	0.702316	0.0135445	0.691573	-0.0580412	0.29309
ENSMUSG00000013076	Amotl1	144	-0.214192	0.793298	-0.205828	0.76934	0.038966	0.165543	-0.0490736	0.168442
ENSMUSG00000013076	Amotl1	145	-0.244767	0.799224	-0.234961	0.619405	0.150725	0.0420443	9.78e-05	0.998926
ENSMUSG00000013076	Amotl1	146	-0.0806041	0.947442	-0.0734738	0.877226	0.305132	0.0152268	0.162248	0.338249
ENSMUSG00000013076	Amotl1	147	-0.31675	0.71176	-0.303893	0.132047	0.132454	0.235594	0.154768	0.111024
ENSMUSG00000013076	Amotl1	148	0.131934	0.855663	0.143498	0.587839	0.149413	0.0902662	0.0797768	0.219475
ENSMUSG00000013076	Amotl1	149	-0.116384	0.916264	-0.107608	0.834501	0.124257	0.213646	0.0317429	0.579957
ENSMUSG00000013076	Amotl1	150	-0.230878	0.726345	-0.220628	0.322983	0.109865	0.0856265	-0.00756125	0.857497
ENSMUSG00000013076	Amotl1	151	-0.125604	0.909632	-0.10429	0.830658	-0.0372641	0.23566	-0.130656	0.14911
ENSMUSG00000013076	Amotl1	152	-0.25123	0.702276	-0.23749	0.370244	-0.144692	0.166176	-0.16448	0.00265955
ENSMUSG00000013076	Amotl1	153	-0.368309	0.492409	-0.359131	0.193722	-0.242796	0.0635611	-0.156535	0.13076
ENSMUSG00000013076	Amotl1	154	0.190774	0.779591	0.204763	0.582551	0.00896332	0.87579	-0.0365801	0.435389
ENSMUSG00000013076	Amotl1	155	-0.241303	0.716115	-0.228533	0.163618	-0.0725018	0.337732	-0.0730236	0.348192
ENSMUSG00000013076	Amotl1	156	-0.186191	0.737915	-0.169502	0.161422	-0.0585816	0.0406912	-0.118627	0.370092
ENSMUSG00000013076	Amotl1	157	0.158006	0.742993	0.173883	0.165438	-0.0379895	0.453312	-0.115181	0.0804779
ENSMUSG00000013076	Amotl1	158	0.312241	0.564471	0.32965	0.309852	-0.142562	0.354434	-0.17822	0.0593119
ENSMUSG00000013076	Amotl1	159	-0.35941	0.460919	-0.343798	0.0444122	-0.268853	0.0172493	-0.317463	0.00271064
ENSMUSG00000013076	Amotl1	160	-0.00150486	0.998697	0.012963	0.948622	-0.293586	0.037102	-0.0301138	0.777575
ENSMUSG00000013076	Amotl1	161	-0.311737	0.443504	-0.294976	0.187607	-0.0485925	0.645444	-0.111501	0.115011
ENSMUSG00000013076	Amotl1	162	-0.606744	0.0644019	-0.590836	3.19782e-05	-0.295925	0.0808384	-0.159454	0.157663
ENSMUSG00000013076	Amotl1	163	-0.733196	0.0403965	-0.715758	0.0116805	-0.143017	0.124717	-0.121276	0.0666284
ENSMUSG00000013076	Amotl1	164	-0.96827	0.0648779	-0.967163	0.140247	-0.125072	0.161434	-0.0844881	0.201141
ENSMUSG00000013076	Amotl1	165	-0.424087	0.392229	-0.400525	0.424379	0.0882445	0.0144247	0.0457875	0.0953911
ENSMUSG00000013076	Amotl1	166	0.052615	0.944558	0.0653781	0.70929	0.124519	0.00628511	0.00787044	0.835111
ENSMUSG00000013076	Amotl1	167	-0.967415	0.000134347	-0.951575	0.0516318	0.0456825	0.53587	0.0223286	0.84391
ENSMUSG00000013076	Amotl1	168	-0.174926	0.807116	-0.169967	0.65768	0.169932	0.0104541	0.0323958	0.475371
ENSMUSG00000013076	Amotl1	169	0.0361863	0.957984	0.0513591	0.585782	0.301929	0.00902847	0.237846	0.0516226
ENSMUSG00000013076	Amotl1	170	-0.597843	0.130266	-0.581434	0.0339152	0.500995	0.00773687	0.452191	0.0312658
ENSMUSG00000013076	Amotl1	171	-0.814943	0.238335	-0.799981	0.113946	0.442245	0.000276585	0.242454	0.157106
ENSMUSG00000013076	Amotl1	172	-1.18592	0.0578463	-1.20076	0.126914	0.590284	0.00472486	0.344103	0.0604857
ENSMUSG00000013076	Amotl1	173	-1.23638	0.0184663	-1.22811	0.033922	-0.231376	0.0510479	-0.403132	0.102307
ENSMUSG00000013076	Amotl1	174	-1.10305	0.00349173	-1.08409	0.0151914	-0.163011	0.30092	-0.123462	0.571131
ENSMUSG00000013076	Amotl1	175	-0.83592	0.0428162	-0.828376	0.0668374	-0.206226	0.0394977	-0.184708	0.00400435
ENSMUSG00000013076	Amotl1	176	0.025764	0.973884	0.0419429	0.875335	-0.186685	0.00195349	-0.203639	0.0242671
ENSMUSG00000013076	Amotl1	177	-0.360253	0.460686	-0.347732	0.097055	-0.0703155	0.0845319	-0.0615776	0.305145
ENSMUSG00000013076	Amotl1	178	-0.115069	0.845236	-0.103198	0.657764	0.110178	0.0726371	0.116983	0.0843495
ENSMUSG00000013076	Amotl1	179	-0.20096	0.842038	-0.186795	0.696919	0.155466	0.00825309	-0.0577377	0.281759
ENSMUSG00000013076	Amotl1	180	-0.575299	0.109871	-0.563361	0.0589424	-0.0674713	0.130475	-0.0151188	0.820911
ENSMUSG00000013076	Amotl1	181	-0.0911322	0.90943	-0.0765049	0.499822	0.0217483	0.501578	0.0761627	0.170029
ENSMUSG00000013076	Amotl1	182	0.137643	0.816042	0.15344	0.117995	0.178287	0.0577784	0.0790226	0.0488912
ENSMUSG00000013076	Amotl1	183	-0.20173	0.773426	-0.184456	0.151393	0.00917362	0.161963	0.0756266	0.0756288
ENSMUSG00000013076	Amotl1	184	-0.120842	0.865946	-0.104248	0.36053	0.0162492	0.780332	-0.00331614	0.945915
ENSMUSG00000013076	Amotl1	185	0.397678	0.264094	0.414006	0.0855312	0.240591	0.0288345	0.181582	0.0810077
ENSMUSG00000013076	Amotl1	186	0.338956	0.471223	0.355053	0.0241943	0.249308	0.0131347	0.169014	0.00938293
ENSMUSG00000013076	Amotl1	187	0.0289216	0.962719	0.0450275	0.854815	0.156711	0.149476	0.216398	0.0117398
ENSMUSG00000013076	Amotl1	188	0.585953	0.0458116	0.600224	0.140425	0.202591	0.118111	0.460436	0.0246946
ENSMUSG00000013076	Amotl1	189	0.582743	0.0500882	0.596732	0.0620263	0.169833	0.207109	0.349469	0.0505598
ENSMUSG00000013076	Amotl1	190	1.2478	5.88e-07	1.26284	0.0134229	0.161221	0.240257	0.675982	0.0110835
ENSMUSG00000013076	Amotl1	191	-0.131573	0.808774	-0.118625	0.600688	0.284831	0.0517371	0.262757	0.0367089
ENSMUSG00000013076	Amotl1	192	0.0594647	0.930317	0.0756716	0.509242	0.293066	0.0785274	0.404765	0.025651
ENSMUSG00000013076	Amotl1	193	-0.200869	0.734066	-0.184316	0.189317	0.296171	0.0611561	0.413652	0.00155181
ENSMUSG00000013076	Amotl1	194	-0.310779	0.405545	-0.296609	0.209234	0.396559	0.0117988	0.510165	0.00587143
ENSMUSG00000013076	Amotl1	195	0.102904	0.846798	0.117614	0.496769	0.348249	0.0525148	0.415129	0.0148921
ENSMUSG00000013076	Amotl1	196	0.0117539	0.991256	0.0271743	0.718642	0.264603	0.0503029	0.402438	0.0222933
ENSMUSG00000013076	Amotl1	197	0.144565	0.807166	0.158969	0.502151	0.267173	0.0467972	0.335169	0.0416429
ENSMUSG00000013076	Amotl1	198	0.14282	0.842038	0.159322	0.06875	0.221446	0.0186042	0.111159	0.00743404
ENSMUSG00000013076	Amotl1	199	0.123656	0.846446	0.135969	0.632797	0.0849575	0.185528	0.0834589	0.203055
ENSMUSG00000013076	Amotl1	200	-2.08754	0.0886416	-6.84791	0.362772	-0.378047	0.0521408	-0.469965	0.0368333
ENSMUSG00000013076	Amotl1	201	0.367945	0.412291	0.381867	0.0714607	0.00082176	0.941531	0.0623781	0.414017
ENSMUSG00000013076	Amotl1	202	0.00955708	0.998697	0.0205456	0.931862	-0.0545087	0.0719994	-0.112913	0.0641384
ENSMUSG00000013076	Amotl1	203	-0.400741	0.359054	-0.383942	0.151587	-0.223463	0.0063467	-0.0768653	0.347909
ENSMUSG00000013076	Amotl1	204	-1.1029	0.00543114	-1.08641	0.00420975	-0.571997	0.0379775	-0.127147	0.0549862
ENSMUSG00000013076	Amotl1	205	-0.344563	0.779591	-0.345034	0.519945	-1.00065	0.0252267	-0.686129	0.117142
ENSMUSG00000013076	Amotl1	206	-0.715331	0.0312512	-0.700349	0.114793	-0.631383	0.00783581	-0.554281	0.0167175
ENSMUSG00000013076	Amotl1	207	-0.733162	0.00709891	-0.720454	0.0307275	-0.341151	0.0082385	-0.348557	0.00264573
ENSMUSG00000013076	Amotl1	208	-0.287988	0.637474	-0.271106	0.348325	-0.239297	0.013785	-0.163883	0.0614276
ENSMUSG00000013076	Amotl1	209	-0.0102988	0.991779	0.00586777	0.941844	-0.0364125	0.105	-0.11237	0.0770346
ENSMUSG00000013076	Amotl1	210	-0.153243	0.757148	-0.138417	0.185024	-0.050886	0.281565	-0.0812011	0.0508707
ENSMUSG00000013076	Amotl1	211	0.0862246	0.88726	0.102792	0.221885	0.136935	0.0828788	-0.0386769	0.205965
ENSMUSG00000013076	Amotl1	212	0.146773	0.811118	0.162976	0.00532247	0.202122	0.0292164	-0.0855191	0.0426889
ENSMUSG00000013076	Amotl1	213	0.0906916	0.929772	0.108206	0.175836	0.165047	0.203529	0.0171907	0.86353
ENSMUSG00000013076	Amotl1	214	-0.347903	0.492409	-0.334532	0.141825	-0.12107	0.00263657	-0.0801859	0.421821
ENSMUSG00000013076	Amotl1	215	-0.32119	0.642126	-0.303538	0.286975	-0.0696495	0.281135	-0.18773	0.00796432
ENSMUSG00000013076	Amotl1	216	-0.116537	0.886386	-0.103122	0.633273	-0.0705185	0.087611	-0.141808	0.00249636
ENSMUSG00000013076	Amotl1	217	0.50948	0.358471	0.524653	0.079251	0.182114	0.00892327	0.0411973	0.157939
ENSMUSG00000013076	Amotl1	218	0.370527	0.298576	0.384762	0.0954913	0.20592	0.0300995	0.198508	0.0264888
ENSMUSG00000013076	Amotl1	219	0.427665	0.217751	0.442946	0.0261905	-0.045691	0.581736	-0.0321477	0.0722747
ENSMUSG00000013076	Amotl1	220	-0.316655	0.744137	-0.319856	0.621587	-0.41597	0.0549531	-0.281768	0.00664517
ENSMUSG00000013076	Amotl1	221	0.258641	0.732515	0.259152	0.707375	0.0451596	0.394305	0.00196976	0.978353
ENSMUSG00000013076	Amotl1	222	-0.38175	0.366752	-0.369911	0.211231	-0.21178	0.00701731	-0.188483	0.038967
ENSMUSG00000013076	Amotl1	223	-0.196041	0.659423	-0.180955	0.20205	-0.0782308	0.022225	-0.0226184	0.208599
ENSMUSG00000013076	Amotl1	224	0.0117595	0.99432	0.0341079	0.927722	-0.0287423	0.544423	-0.00818209	0.904761
ENSMUSG00000013076	Amotl1	225	-0.11552	0.868475	-0.102077	0.626919	0.0135203	0.656062	0.0192639	0.703588
ENSMUSG00000013076	Amotl1	226	-0.0721314	0.945931	-0.0695447	0.78082	0.162451	0.0232488	0.0331815	0.38231
ENSMUSG00000013076	Amotl1	227	-0.269494	0.662525	-0.251384	0.385292	0.0982793	0.191221	0.0886431	0.222118
ENSMUSG00000013076	Amotl1	228	-0.0408796	0.959447	-0.0251857	0.882992	0.0232246	0.633588	-0.00744968	0.744797
ENSMUSG00000013076	Amotl1	229	0.584494	0.237207	0.600316	0.0610763	0.47552	0.00174846	0.412251	0.0202281
ENSMUSG00000013076	Amotl1	230	0.456056	0.435505	0.471799	0.354173	0.563163	0.0223611	0.566866	0.0442617
ENSMUSG00000014294	Ndufa2	1	-0.524985	0.640652	-0.523843	0.326008	-0.546504	0.0356408	-0.453466	0.00335156
ENSMUSG00000014294	Ndufa2	2	-0.964432	0.678316	-0.951313	0.0153824	-0.65641	0.321115	-0.835256	0.14522
ENSMUSG00000014294	Ndufa2	3	-0.420014	0.563601	-0.416173	0.204642	-0.582569	0.00574501	-0.495423	0.0041973
ENSMUSG00000014294	Ndufa2	4	-0.504582	0.249773	-0.487491	0.224998	-0.0780181	0.246696	-0.0872355	0.0914804
ENSMUSG00000014294	Ndufa2	5	0.059782	0.949495	0.0764583	0.731821	-0.0853601	0.0437693	-0.133217	0.169556
ENSMUSG00000014294	Ndufa2	6	-0.149478	0.779591	-0.134243	0.456489	-0.260991	0.000557329	-0.24358	0.0215952
ENSMUSG00000014294	Ndufa2	7	-0.0911838	0.892547	-0.0749723	0.78215	-0.223948	0.00177431	-0.311074	0.0303886
ENSMUSG00000014294	Ndufa2	8	-0.371695	0.429473	-0.35626	0.249227	-0.228794	0.0126244	-0.282339	0.0611147
ENSMUSG00000014294	Ndufa2	9	0.15062	0.818503	0.160163	0.68157	-0.538973	0.00793943	-0.476718	0.0314463
ENSMUSG00000014294	Ndufa2	10	0.0247348	0.977541	0.0386091	0.865841	0.163856	0.133772	0.219255	0.129248
ENSMUSG00000014294	Ndufa2	11	1.00373	0.00185635	1.02138	0.0936855	0.628114	0.00451929	0.61975	0.00248194
ENSMUSG00000014294	Ndufa2	12	0.171869	0.863837	0.178131	0.662349	0.708278	0.0799534	0.450964	0.00665639
ENSMUSG00000014313	Cox6c	1	0.131817	0.820821	0.146851	0.22185	0.0956691	0.0079936	0.0393851	0.679071
ENSMUSG00000014313	Cox6c	2	-0.32527	0.55962	-0.311392	0.25669	-0.0465576	0.41296	-0.124189	0.16491
ENSMUSG00000014313	Cox6c	3	-0.162088	0.807763	-0.148702	0.503436	0.061884	0.100155	0.075981	0.209606
ENSMUSG00000014313	Cox6c	4	0.0552304	0.949558	0.071444	0.745851	-0.192923	0.098142	0.0419564	0.792583
ENSMUSG00000014313	Cox6c	5	-0.58024	0.194622	-0.565835	0.101548	0.0351715	0.513439	0.151584	0.11153
ENSMUSG00000014602	Kif1a	1	0.138231	0.764955	0.153164	0.552682	-0.332414	0.00586278	-0.287281	0.002074
ENSMUSG00000014602	Kif1a	2	0.345138	0.239922	0.360626	0.015623	-0.277237	0.00232567	-0.26125	0.00214534
ENSMUSG00000014602	Kif1a	3	0.463599	0.134997	0.478135	0.0304082	-0.123227	0.165052	-0.149507	0.108853
ENSMUSG00000014602	Kif1a	4	0.16773	0.934379	0.130068	0.863963	0.0874134	0.625154	0.206966	0.23042
ENSMUSG00000014602	Kif1a	5	0.21542	0.729055	0.226024	0.547771	0.0162794	0.352313	-0.0190241	0.304316
ENSMUSG00000014602	Kif1a	6	-0.0537348	0.945523	-0.0385636	0.852776	-0.157243	0.0268747	-0.0980524	0.0815578
ENSMUSG00000014602	Kif1a	7	0.0165472	0.991256	0.0215152	0.972823	0.00410294	0.889513	0.012893	0.719931
ENSMUSG00000014602	Kif1a	8	-0.00971655	0.997987	0.00133657	0.997309	-0.0940601	0.250465	-0.148263	0.00029439
ENSMUSG00000014602	Kif1a	9	0.0705469	0.943724	0.085578	0.82929	0.122193	0.0689014	0.0666164	0.152626
ENSMUSG00000014602	Kif1a	10	-0.749946	0.0833069	-0.733611	0.185262	0.265911	0.109874	0.101978	0.0078036
ENSMUSG00000014602	Kif1a	11	-0.0986062	0.885484	-0.0877697	0.642679	0.128066	0.0695913	0.145647	0.305985
ENSMUSG00000014602	Kif1a	12	0.272543	0.796755	0.281491	0.410169	-0.295334	0.029085	-0.0289036	0.841264
ENSMUSG00000014602	Kif1a	13	-0.362316	0.432213	-0.351068	0.276034	0.089949	0.264464	0.091594	0.109676
ENSMUSG00000014602	Kif1a	14	0.0198059	0.982719	0.0363514	0.87951	-0.126566	0.150486	0.136853	0.313547
ENSMUSG00000014602	Kif1a	15	0.0907731	0.868475	0.107398	0.572779	-0.33075	0.0823101	0.0198673	0.916691
ENSMUSG00000014602	Kif1a	16	0.415622	0.25437	0.432168	0.16422	0.263904	0.0203627	0.180758	0.00766521
ENSMUSG00000014602	Kif1a	17	0.0819678	0.885109	0.0984688	0.253426	-0.217827	0.0680507	-0.0963236	0.16248
ENSMUSG00000014602	Kif1a	18	0.0528897	0.948656	0.0654423	0.865192	-0.0614338	0.235218	-0.112275	0.00468752
ENSMUSG00000014602	Kif1a	19	0.261593	0.596172	0.277334	0.0575852	0.130343	0.0232262	0.149918	0.0324737
ENSMUSG00000014602	Kif1a	20	-0.166427	0.81497	-0.153883	0.472217	-0.0152793	0.807114	-0.0720648	0.143569
ENSMUSG00000014602	Kif1a	21	-0.11115	0.849692	-0.0972432	0.680349	-0.00401495	0.920253	0.0580473	0.0193326
ENSMUSG00000014602	Kif1a	22	-0.191843	0.728764	-0.175828	0.17357	-0.081642	0.0123833	-0.171085	0.0109025
ENSMUSG00000014602	Kif1a	23	-0.7382	0.0677934	-0.723292	0.0566347	0.061306	0.138474	-0.106625	0.196309
ENSMUSG00000014602	Kif1a	24	-0.235166	0.701592	-0.219295	0.470743	-0.00593857	0.844824	-0.114152	0.0516236
ENSMUSG00000014602	Kif1a	25	-0.413729	0.361375	-0.403354	0.159307	0.1104	0.166057	0.0584272	0.0266303
ENSMUSG00000014602	Kif1a	26	0.0683547	0.944558	0.0819787	0.639581	0.256232	0.0829862	0.091347	0.0364155
ENSMUSG00000014602	Kif1a	27	0.121339	0.860422	0.136121	0.552711	0.175788	0.0754205	0.0328344	0.537845
ENSMUSG00000014602	Kif1a	28	-0.113936	0.87105	-0.101543	0.555102	0.0538657	0.124752	0.0361918	0.40711
ENSMUSG00000014602	Kif1a	29	-0.0890541	0.94813	-0.109382	0.882443	0.13729	0.0131061	-0.0188222	0.00611467
ENSMUSG00000014602	Kif1a	30	0.483778	0.419849	0.49001	0.451084	0.024405	0.563088	-0.00239603	0.964795
ENSMUSG00000014602	Kif1a	31	0.467947	0.536455	0.487083	0.539212	0.15211	0.00108768	0.0733244	0.38439
ENSMUSG00000014602	Kif1a	32	0.221763	0.818503	0.217922	0.7522	0.206236	0.0266894	0.0353133	0.382854
ENSMUSG00000014602	Kif1a	33	-0.49258	0.360733	-0.48223	0.331333	0.190026	0.0446802	0.160747	0.0617177
ENSMUSG00000014602	Kif1a	34	0.0760907	0.945931	0.0839817	0.842315	-0.0711719	0.0551211	-0.0713832	0.336137
ENSMUSG00000014602	Kif1a	35	0.312756	0.773064	0.310726	0.534062	0.264109	0.0209167	0.258747	0.0314817
ENSMUSG00000014602	Kif1a	36	-0.0471331	0.960537	-0.0369727	0.888453	0.142147	0.0509073	0.0751837	0.217112
ENSMUSG00000014602	Kif1a	37	0.356418	0.424922	0.366546	0.199539	0.390437	0.0131404	0.310071	0.00343372
ENSMUSG00000014602	Kif1a	38	-0.0431778	0.947844	-0.0293472	0.810835	-0.107882	0.153227	-0.0366784	0.261308
ENSMUSG00000014602	Kif1a	39	-0.281758	0.692148	-0.266505	0.442521	0.00525088	0.914542	-0.0700395	0.283581
ENSMUSG00000014602	Kif1a	40	-0.155633	0.772527	-0.142405	0.471169	-0.16472	0.0101789	-0.146668	0.00303602
ENSMUSG00000014602	Kif1a	41	-0.0521308	0.937802	-0.0355566	0.71343	-0.152209	0.144832	-0.142241	0.012547
ENSMUSG00000014602	Kif1a	42	0.569455	0.0428162	0.585607	0.00961511	-0.0428143	0.501824	0.00949637	0.730756
ENSMUSG00000014602	Kif1a	43	0.107607	0.849352	0.122633	0.335955	-0.105198	0.0279232	-0.146006	0.0410673
ENSMUSG00000014602	Kif1a	44	0.556035	0.0528674	0.570882	0.0737512	-0.503263	0.0194793	-0.713102	0.0287724
ENSMUSG00000014602	Kif1a	45	0.0151402	0.986137	0.0280523	0.904265	-0.738605	0.00814518	-0.71504	0.00971619
ENSMUSG00000014602	Kif1a	46	0.379149	0.259527	0.394073	0.0936904	-0.612534	0.000913096	-0.665162	0.0238778
ENSMUSG00000014602	Kif1a	47	-0.073833	0.91225	-0.0609009	0.673013	-0.311592	0.00551653	-0.289516	0.00668828
ENSMUSG00000014602	Kif1a	48	0.0220422	0.980126	0.0333697	0.920393	0.0242105	0.56175	-0.0230908	0.503937
ENSMUSG00000014602	Kif1a	49	0.236239	0.737915	0.246557	0.330158	0.145952	0.000215368	0.122894	0.0387067
ENSMUSG00000014602	Kif1a	50	0.52364	0.248705	0.53712	0.0651147	0.138545	0.01263	0.0944142	0.182119
ENSMUSG00000014602	Kif1a	51	-0.394729	0.43362	-0.381493	0.20739	-0.0507542	0.260358	-0.0525732	0.0195428
ENSMUSG00000014602	Kif1a	52	0.0681876	0.943774	0.0764489	0.761958	0.291682	0.0247005	0.27359	0.0449959
ENSMUSG00000014602	Kif1a	53	0.044006	0.979418	0.0567778	0.629883	0.408806	0.072776	0.343097	0.0190088
ENSMUSG00000014602	Kif1a	54	-0.222981	0.752508	-0.205618	0.287608	0.0499349	0.45747	0.0744774	0.174375
ENSMUSG00000014602	Kif1a	55	0.0300184	0.981948	0.0475688	0.827682	0.291783	0.0257875	0.0423794	0.571689
ENSMUSG00000014602	Kif1a	56	-0.291655	0.737915	-0.28145	0.486055	0.127367	0.185629	0.107675	0.0168881
ENSMUSG00000014602	Kif1a	57	0.206559	0.654466	0.222353	0.226542	0.104085	0.0514254	0.096443	0.153265
ENSMUSG00000014602	Kif1a	58	0.0602193	0.934852	0.0736725	0.564442	0.212679	0.034293	0.0737457	0.19697
ENSMUSG00000014602	Kif1a	59	0.430924	0.367303	0.443344	0.187579	0.159968	0.0563792	0.0420426	0.267463
ENSMUSG00000014602	Kif1a	60	0.31609	0.541793	0.327539	0.269608	0.0282428	0.529688	0.0205146	0.0878496
ENSMUSG00000014602	Kif1a	61	-0.243545	0.637474	-0.227644	0.279468	-0.0533729	0.333929	-0.0339944	0.10202
ENSMUSG00000014602	Kif1a	62	0.0491915	0.949495	0.0667014	0.749451	0.0171951	0.643329	0.0220255	0.53204
ENSMUSG00000014602	Kif1a	63	0.0228912	0.981948	0.0364744	0.899941	0.0574168	0.0584407	0.0186839	0.677545
ENSMUSG00000014602	Kif1a	64	0.611224	0.284979	0.633808	0.370763	0.183686	0.0308987	0.0925901	0.122709
ENSMUSG00000014602	Kif1a	65	0.227826	0.697898	0.23883	0.372505	0.201005	0.00439601	0.194484	0.205684
ENSMUSG00000014602	Kif1a	66	0.14108	0.863837	0.145781	0.683595	0.0763544	0.103572	0.123081	0.243337
ENSMUSG00000014602	Kif1a	67	-0.024357	0.986471	-0.0236494	0.96447	0.0686004	0.246613	0.00674179	0.863794
ENSMUSG00000014602	Kif1a	68	0.0619936	0.942178	0.0770123	0.479066	0.142223	0.132828	0.0497797	0.014932
ENSMUSG00000014602	Kif1a	69	0.463687	0.483092	0.471531	0.113156	0.181517	0.0264194	0.0572547	0.00532303
ENSMUSG00000014602	Kif1a	70	0.625641	0.0961297	0.638763	0.0428833	0.189807	0.0441964	0.13412	0.0392655
ENSMUSG00000014602	Kif1a	71	0.677026	0.119303	0.687892	0.0717587	0.245731	0.00952534	0.0859953	0.0578395
ENSMUSG00000014602	Kif1a	72	0.644962	0.123987	0.657703	0.0550859	0.222787	0.00142881	0.221488	0.0419095
ENSMUSG00000014602	Kif1a	73	0.698515	0.185088	0.709967	0.0706029	0.247291	0.0144021	0.146051	0.0248988
ENSMUSG00000014602	Kif1a	74	0.393163	0.370544	0.40955	0.00767487	0.111597	0.00183301	0.0144051	0.824236
ENSMUSG00000014602	Kif1a	75	0.540219	0.477296	0.543172	0.394859	0.385848	0.0113045	0.245163	0.0221751
ENSMUSG00000014602	Kif1a	76	0.153766	0.764067	0.169766	0.30332	-0.134746	0.01751	-0.122389	0.0572922
ENSMUSG00000014602	Kif1a	77	0.332289	0.405545	0.345856	0.119693	-0.101164	0.0302313	-0.180342	0.0230565
ENSMUSG00000014602	Kif1a	78	0.413088	0.402725	0.427831	0.0332278	-0.0505384	0.367431	-0.109659	0.0218228
ENSMUSG00000014602	Kif1a	79	0.274765	0.55962	0.287805	0.256442	-0.185947	0.0488701	-0.186434	0.0222626
ENSMUSG00000014602	Kif1a	80	-0.0796792	0.930317	-0.0702	0.85272	-0.0964624	0.251364	-0.0500702	0.346016
ENSMUSG00000014602	Kif1a	81	0.0942183	0.913695	0.105571	0.595551	-0.149316	0.0430115	-0.202311	0.0363336
ENSMUSG00000014602	Kif1a	82	-0.120749	0.882602	-0.111034	0.690142	-0.0144844	0.808671	-0.0325067	0.610051
ENSMUSG00000014602	Kif1a	83	0.113302	0.818503	0.129268	0.0210485	-0.0359949	0.475775	0.00744387	0.858755
ENSMUSG00000014602	Kif1a	84	-0.0560937	0.949495	-0.048905	0.901163	-0.107335	0.230218	-0.0256806	0.750164
ENSMUSG00000014602	Kif1a	85	-0.299077	0.595707	-0.285702	0.30286	-0.144138	0.0275471	-0.079171	0.142944
ENSMUSG00000014602	Kif1a	86	-0.388235	0.447372	-0.377917	0.373796	-0.146014	0.0276327	-0.0804264	0.0176396
ENSMUSG00000014602	Kif1a	87	0.103973	0.916774	0.112124	0.726393	0.17092	0.185792	0.115514	0.0139505
ENSMUSG00000014602	Kif1a	88	0.00871057	0.998697	0.0187916	0.954816	0.140036	0.0174116	0.093978	0.0105513
ENSMUSG00000014602	Kif1a	89	-0.278708	0.726347	-0.252589	0.705821	0.0503672	0.46896	0.0195671	0.549349
ENSMUSG00000014602	Kif1a	90	0.0632355	0.947442	0.075179	0.699876	0.0120661	0.647037	0.0209802	0.648214
ENSMUSG00000014602	Kif1a	91	-0.136624	0.805226	-0.121432	0.083034	-0.0630236	0.130554	-0.0924244	0.150368
ENSMUSG00000014602	Kif1a	92	-0.217218	0.68304	-0.201779	0.0693702	-0.206799	0.0102063	-0.175338	0.0160699
ENSMUSG00000014602	Kif1a	93	0.0161992	0.992504	0.0254654	0.946876	-0.0332864	0.519912	-0.0374849	0.658753
ENSMUSG00000014602	Kif1a	94	-0.53566	0.459727	-0.536781	0.398166	0.0734933	0.382792	0.0849249	0.336583
ENSMUSG00000014602	Kif1a	95	-0.222657	0.701781	-0.211144	0.313178	0.0256685	0.665885	0.0106931	0.789486
ENSMUSG00000014602	Kif1a	96	-0.117109	0.845236	-0.101821	0.417516	0.0289912	0.558949	0.0348701	0.512812
ENSMUSG00000014602	Kif1a	97	0.000179823	0.999413	0.0118863	0.945233	-0.0708215	0.148106	-0.0288711	0.299913
ENSMUSG00000014602	Kif1a	98	0.118442	0.832317	0.131845	0.698394	0.220181	0.0221571	0.364229	0.0228455
ENSMUSG00000014602	Kif1a	99	1.04888	0.108054	1.04892	0.219568	0.584357	0.404182	0.419911	0.169396
ENSMUSG00000014602	Kif1a	100	1.10879	0.164101	1.1209	0.0718213	-0.383758	0.156667	0.419009	0.00946679
ENSMUSG00000014602	Kif1a	101	1.78245	1.54e-07	1.79737	0.00837847	-0.101904	0.417393	0.371985	0.0914581
ENSMUSG00000014602	Kif1a	102	-0.0808533	0.909715	-0.0655318	0.0631137	0.0532719	0.230926	0.0197228	0.750023
ENSMUSG00000014602	Kif1a	103	0.454391	0.378317	0.469147	0.0344325	-7.18e-05	0.997901	-0.0129461	0.878576
ENSMUSG00000014602	Kif1a	104	-0.00163758	0.998697	-0.00646485	0.988797	0.346487	0.00109706	0.33579	0.0131276
ENSMUSG00000014602	Kif1a	105	0.0800105	0.91598	0.0967569	0.447665	0.0840284	0.205516	-0.0409363	0.254342
ENSMUSG00000014602	Kif1a	106	0.0488701	0.948346	0.0610902	0.823797	0.108011	0.130227	0.0692126	0.162389
ENSMUSG00000014602	Kif1a	107	0.0874641	0.915784	0.100156	0.622467	0.0227642	0.330178	0.0157192	0.673672
ENSMUSG00000014602	Kif1a	108	0.263596	0.55962	0.276901	0.325936	0.104525	0.0421071	0.0580851	0.459409
ENSMUSG00000014602	Kif1a	109	-0.178775	0.692148	-0.163195	0.166131	0.00661204	0.766003	-0.000149533	0.997846
ENSMUSG00000014602	Kif1a	110	0.587173	0.0342463	0.602572	0.00978814	0.276264	0.00242071	0.14067	0.0234461
ENSMUSG00000014602	Kif1a	111	-0.180186	0.722365	-0.164227	0.363798	-0.166316	0.0237829	-0.0917811	0.0908427
ENSMUSG00000014602	Kif1a	112	-0.296624	0.529173	-0.285241	0.297548	-0.140995	0.0112848	-0.15471	0.000820206
ENSMUSG00000014602	Kif1a	113	-0.0774165	0.91225	-0.060659	0.753885	-0.189734	0.00404621	-0.350442	0.0200192
ENSMUSG00000014602	Kif1a	114	-0.0272489	0.967458	-0.0110569	0.921087	-0.178811	0.015734	-0.2009	0.0091896
ENSMUSG00000014602	Kif1a	115	-0.993085	0.0634219	-0.994097	0.0857601	-0.39764	0.0447758	-0.297991	0.154031
ENSMUSG00000014602	Kif1a	116	-0.370163	0.419392	-0.356088	0.178911	-0.224214	0.0438249	-0.147256	0.0625315
ENSMUSG00000014602	Kif1a	117	-0.989355	0.121544	-1.01464	0.260085	-0.375436	0.00841403	-0.306141	0.0634696
ENSMUSG00000015222	Map2	1	0.136629	0.809986	0.151646	0.12215	0.228858	0.00499833	0.130117	0.0905148
ENSMUSG00000015222	Map2	2	-0.576791	0.379707	-0.566785	0.079446	0.0625026	0.480332	0.0709642	0.153404
ENSMUSG00000015222	Map2	3	-0.339487	0.506433	-0.327066	0.144844	0.237768	0.127484	0.305171	0.161092
ENSMUSG00000015222	Map2	4	0.953122	0.103029	0.960805	0.108989	2.56833	0.00209181	2.86129	0.0247381
ENSMUSG00000015222	Map2	5	1.79736	1.04e-08	1.816	0.0128267	5.09667	0.00352717	5.23258	0.0236117
ENSMUSG00000015222	Map2	6	0.723812	0.124682	0.737543	0.134043	4.14547	0.00979166	4.06583	0.0157608
ENSMUSG00000015222	Map2	7	-0.657931	0.0500738	-0.643373	0.144151	-0.391463	0.0229518	-0.182906	0.260478
ENSMUSG00000015222	Map2	8	-0.0623771	0.929772	-0.045423	0.856456	-0.118531	0.0425491	-0.0266014	0.624982
ENSMUSG00000015222	Map2	9	0.0418884	0.948656	0.0572766	0.750739	0.321932	0.022761	0.348552	0.020726
ENSMUSG00000015222	Map2	10	-0.120141	0.822856	-0.103435	0.599155	0.238146	0.054198	0.215357	0.0206174
ENSMUSG00000015222	Map2	11	-0.644096	0.12062	-0.636315	0.129327	0.362908	0.0950887	0.359111	0.0736434
ENSMUSG00000015222	Map2	12	0.0555746	0.959447	0.0739093	0.637178	-0.255991	0.104609	-0.14759	0.315507
ENSMUSG00000015222	Map2	13	0.294819	0.524912	0.310995	0.2078	-0.175257	0.0643505	-0.0129135	0.902527
ENSMUSG00000015222	Map2	14	0.165714	0.790536	0.179193	0.219536	-0.143093	0.137126	0.0444883	0.828361
ENSMUSG00000015222	Map2	15	-0.230866	0.648773	-0.21533	0.132452	-0.154565	0.126085	0.0348367	0.762262
ENSMUSG00000015222	Map2	16	-0.352104	0.525699	-0.334897	0.195961	-0.110689	0.266267	0.103283	0.33484
ENSMUSG00000015222	Map2	17	-0.987899	0.00224791	-0.974793	0.00803888	-0.0731768	0.348425	0.062455	0.286943
ENSMUSG00000015222	Map2	18	-0.0519224	0.961673	-0.0354806	0.901269	-0.182894	0.147644	-0.18244	0.300713
ENSMUSG00000015222	Map2	19	-0.457495	0.330408	-0.440526	0.0914358	-0.041622	0.611521	0.113352	0.00972948
ENSMUSG00000015222	Map2	20	-0.472708	0.464539	-0.464885	0.3553	0.0641313	0.6038	0.0131491	0.924869
ENSMUSG00000015222	Map2	21	-0.293704	0.550021	-0.278486	0.0354078	-0.127902	0.0274783	0.0562836	0.793521
ENSMUSG00000015222	Map2	22	-0.358532	0.460919	-0.347098	0.364394	0.00940327	0.847892	-0.0448405	0.659851
ENSMUSG00000015222	Map2	23	-0.0863786	0.917954	-0.070999	0.741664	-0.140215	0.193783	0.0535284	0.803217
ENSMUSG00000015222	Map2	24	-0.276906	0.671349	-0.267586	0.356616	0.0491019	0.220143	-0.000202341	0.990277
ENSMUSG00000015222	Map2	25	-0.307935	0.630688	-0.292873	0.398385	0.113728	0.103136	0.0451688	0.0958948
ENSMUSG00000015222	Map2	26	-0.0784564	0.913695	-0.067001	0.791043	0.00423521	0.944605	0.0743241	0.0421232
ENSMUSG00000015222	Map2	27	-0.00249648	0.998697	0.012518	0.946551	0.0711951	0.193289	0.0448745	0.0291489
ENSMUSG00000015222	Map2	28	-0.277346	0.576156	-0.260587	0.204694	0.30132	0.0247819	0.331781	0.0108967
ENSMUSG00000015222	Map2	29	NA	NA	0	NA	NA	NA	NA	NA
ENSMUSG00000015222	Map2	30	NA	NA	0	NA	NA	NA	NA	NA
ENSMUSG00000015222	Map2	31	NA	NA	0	NA	NA	NA	NA	NA
ENSMUSG00000015222	Map2	32	-0.109626	0.855446	-0.092051	0.662587	0.0111768	0.836883	0.0535957	0.536941
ENSMUSG00000015222	Map2	33	-0.0107653	0.99432	0.00236216	0.990209	-0.0277827	0.0629467	0.219053	0.0853364
ENSMUSG00000015222	Map2	34	-0.229877	0.656818	-0.214007	0.500159	-0.256972	0.0151452	-0.0885042	0.556393
ENSMUSG00000015222	Map2	35	-0.420159	0.349435	-0.405944	0.0247756	0.133755	0.173674	0.128562	0.142973
ENSMUSG00000015222	Map2	36	-0.245515	0.685242	-0.228466	0.23666	0.32493	0.0242385	0.494059	0.00908928
ENSMUSG00000015222	Map2	37	-0.352869	0.530123	-0.341465	0.374365	0.437671	0.0404018	0.577349	0.0613539
ENSMUSG00000015222	Map2	38	-0.323558	0.463931	-0.307784	0.116926	-0.043276	0.658122	0.0565411	0.492896
ENSMUSG00000015222	Map2	39	-0.0419046	0.957984	-0.031341	0.929662	-0.0985382	0.00802971	-0.0471019	0.486172
ENSMUSG00000015222	Map2	40	-0.368337	0.311688	-0.352437	0.00561172	-0.0473749	0.285466	-0.0653465	0.178733
ENSMUSG00000015222	Map2	41	-0.110787	0.847121	-0.0955444	0.725634	0.0209476	0.735509	-0.0270656	0.549152
ENSMUSG00000015222	Map2	42	0.030558	0.970751	0.0470555	0.666114	0.0764137	0.107367	0.118044	0.108854
ENSMUSG00000015222	Map2	43	0.0737311	0.924946	0.0908144	0.71463	0.0301051	0.254721	0.0677496	0.453001
ENSMUSG00000015222	Map2	44	-0.0230767	0.978288	-0.00986995	0.966131	-0.126322	0.0718918	0.112954	0.440908
ENSMUSG00000015222	Map2	45	0.199679	0.637764	0.215384	0.124261	0.0153596	0.860485	0.161398	0.218005
ENSMUSG00000015222	Map2	46	-0.0956771	0.862953	-0.0813664	0.600351	0.0203336	0.571686	0.044204	0.161712
ENSMUSG00000015222	Map2	47	0.446409	0.152786	0.462111	0.0938696	-0.0494995	0.415188	-0.0482897	0.37552
ENSMUSG00000015222	Map2	48	0.290344	0.460205	0.306483	0.219933	-0.00935518	0.442943	-0.0683373	0.27368
ENSMUSG00000015222	Map2	49	0.000798379	0.998697	0.0167342	0.940254	-0.0562963	0.276526	0.0411078	0.604502
ENSMUSG00000015222	Map2	50	-0.102	0.868475	-0.0855687	0.60819	0.0100446	0.666543	-0.0667294	0.0640626
ENSMUSG00000015222	Map2	51	-0.541839	0.104389	-0.525784	0.11327	-0.0842608	0.0805027	-0.0913195	0.268526
ENSMUSG00000015222	Map2	52	0.0803486	0.919404	0.0920849	0.76233	0.13939	0.110293	0.171668	0.105213
ENSMUSG00000015222	Map2	53	-0.0339966	0.960106	-0.0173184	0.930917	0.252485	0.0144982	0.168014	0.0732011
ENSMUSG00000015222	Map2	54	-0.666011	0.11917	-0.651515	0.00275319	0.147713	0.283762	0.37252	0.0542436
ENSMUSG00000015222	Map2	55	-0.268755	0.524912	-0.25251	0.29053	0.210927	0.0494704	0.222591	0.108474
ENSMUSG00000015222	Map2	56	-0.183179	0.685242	-0.167301	0.0194316	0.195318	0.0073735	0.252046	0.0285162
ENSMUSG00000015222	Map2	57	-0.138782	0.832317	-0.121093	0.659067	0.0923459	0.309242	0.109302	0.074722
ENSMUSG00000015222	Map2	58	-0.0185053	0.982624	-0.00344007	0.987019	0.0880063	0.0369334	0.0956238	0.281607
ENSMUSG00000015222	Map2	59	-0.0511912	0.948656	-0.0347249	0.933444	0.0337801	0.605278	0.0134067	0.592904
ENSMUSG00000015222	Map2	60	-0.401021	0.261678	-0.384716	0.0291607	0.111458	0.126951	0.164164	0.095142
ENSMUSG00000015222	Map2	61	-0.245803	0.726038	-0.234725	0.614239	0.305082	0.118168	0.348363	0.0138347
ENSMUSG00000015222	Map2	62	-0.254355	0.716115	-0.237027	0.508203	0.251959	0.236488	0.108406	0.434324
ENSMUSG00000015222	Map2	63	-0.139683	0.802795	-0.123628	0.0938857	0.20931	0.158388	0.264468	0.0481275
ENSMUSG00000015222	Map2	64	-0.59279	0.0744475	-0.577758	0.00556793	0.124435	0.0192842	0.137571	0.057844
ENSMUSG00000015222	Map2	65	-0.0459387	0.94813	-0.0306093	0.900663	-0.0978512	0.316996	0.163163	0.0882877
ENSMUSG00000015222	Map2	66	-0.717301	0.0387088	-0.703085	0.108215	-0.317669	0.0150239	0.0969906	0.602342
ENSMUSG00000015222	Map2	67	0.266525	0.818817	0.280451	0.241444	-0.0447902	0.580859	0.0744695	0.164516
ENSMUSG00000015222	Map2	68	-0.386237	0.529173	-0.373144	0.367725	-0.168346	0.299775	0.0178299	0.903325
ENSMUSG00000015222	Map2	69	-0.478529	0.347632	-0.463505	0.129933	0.0416749	0.147372	0.110571	0.229687
ENSMUSG00000015222	Map2	70	-0.154093	0.865946	-0.141914	0.326549	0.0955452	0.166542	0.115344	0.122547
ENSMUSG00000015222	Map2	71	-0.0739467	0.957722	-0.0585319	0.43872	0.162862	0.0048078	0.0612451	0.386563
ENSMUSG00000015222	Map2	72	-0.776245	0.240439	-0.770638	0.0459599	0.204013	0.0146102	0.0317364	0.541852
ENSMUSG00000015222	Map2	73	-0.170559	0.826145	-0.159222	0.384473	0.158248	0.0761728	0.0859075	0.0823749
ENSMUSG00000015222	Map2	74	-0.341225	0.696507	-0.340823	0.503343	0.062481	0.167821	0.0851934	0.237373
ENSMUSG00000015222	Map2	75	-0.280489	0.520942	-0.264833	0.0736433	0.160206	0.0464611	0.142121	0.00197147
ENSMUSG00000015222	Map2	76	-0.286276	0.544218	-0.273186	0.131401	0.0388505	0.0949364	0.130291	0.0359892
ENSMUSG00000015222	Map2	77	-0.316605	0.442852	-0.302485	0.108061	0.252303	0.0234238	0.294151	0.173845
ENSMUSG00000015222	Map2	78	0.031963	0.960537	0.0490656	0.713075	0.166587	0.297464	0.370664	0.0154978
ENSMUSG00000015222	Map2	79	0.00354266	0.998697	0.0184289	0.932713	0.303744	0.0524317	0.238748	0.0381321
ENSMUSG00000015222	Map2	80	-0.146776	0.818503	-0.131504	0.383503	-0.234994	0.0535489	-0.0886299	0.59358
ENSMUSG00000015222	Map2	81	0.0795066	0.90065	0.0938002	0.415005	-0.0898838	0.153925	-0.0159586	0.783314
ENSMUSG00000015222	Map2	82	-0.198646	0.785175	-0.185193	0.6767	-0.107243	0.307232	-0.00976787	0.883085
ENSMUSG00000015222	Map2	83	-0.267131	0.586879	-0.251295	0.029211	-0.228766	0.0546222	0.0437318	0.746986
ENSMUSG00000015222	Map2	84	-0.21169	0.683891	-0.196414	0.187657	-0.0184853	0.533162	0.111693	0.0344932
ENSMUSG00000015222	Map2	85	-0.129369	0.845236	-0.113021	0.623891	0.179104	0.0946515	0.216292	0.0429015
ENSMUSG00000015222	Map2	86	-0.271611	0.617568	-0.256839	0.0167137	0.0961481	0.104554	0.21623	0.160491
ENSMUSG00000015222	Map2	87	-0.00471108	0.998697	0.01216	0.948204	0.284842	0.00528348	0.247883	0.00501453
ENSMUSG00000015222	Map2	88	-0.375684	0.474063	-0.364077	0.3906	0.186954	0.0504902	0.114433	0.216032
ENSMUSG00000015222	Map2	89	-0.407084	0.457366	-0.394189	0.345856	-0.0114657	0.191981	0.0100885	0.903178
ENSMUSG00000015222	Map2	90	-0.543558	0.295056	-0.527719	0.278342	0.162134	0.173594	0.37604	0.0835866
ENSMUSG00000015222	Map2	91	-0.61289	0.342322	-0.600587	0.0371368	0.0879426	0.740308	0.249002	0.155467
ENSMUSG00000015222	Map2	92	-0.403846	0.226856	-0.388038	0.0121499	0.139883	0.0874343	0.265468	0.0593433
ENSMUSG00000015222	Map2	93	-0.533007	0.257924	-0.516045	0.0210886	0.0156005	0.820351	0.18581	0.0692668
ENSMUSG00000015222	Map2	94	0.0980469	0.91988	0.11305	0.791021	0.079456	0.109573	0.114029	0.1823
ENSMUSG00000015222	Map2	95	-0.409359	0.347259	-0.392332	0.20208	0.177011	0.11369	0.0834255	0.0187445
ENSMUSG00000015222	Map2	96	-0.678031	0.0528674	-0.662387	0.0346035	-0.284797	0.0477671	-0.0147556	0.921548
ENSMUSG00000015222	Map2	97	-0.158459	0.799224	-0.144918	0.377411	-0.0605105	0.425922	0.0510969	0.710119
ENSMUSG00000015222	Map2	98	-0.135303	0.80836	-0.118812	0.643284	-0.0562559	0.0764583	-0.0108108	0.866485
ENSMUSG00000015222	Map2	99	-0.0972221	0.88726	-0.0829139	0.77299	-0.00538505	0.864452	0.00193637	0.982994
ENSMUSG00000015222	Map2	100	-0.114685	0.832317	-0.0984216	0.444552	-0.249319	0.00138537	0.00842163	0.938463
ENSMUSG00000015222	Map2	101	0.324826	0.451873	0.34073	0.0272846	0.02944	0.402044	0.00924108	0.764752
ENSMUSG00000015222	Map2	102	0.273245	0.529173	0.289874	0.0747344	0.161264	0.0228782	0.0131952	0.0366638
ENSMUSG00000015222	Map2	103	0.362384	0.367303	0.379353	0.107951	-0.00957759	0.78979	0.050157	0.5895
ENSMUSG00000015222	Map2	104	-0.174591	0.817048	-0.164237	0.464423	-0.148471	0.109739	-0.0556996	0.529241
ENSMUSG00000015222	Map2	105	0.0629261	0.923933	0.079383	0.453784	-0.0821352	0.136154	-0.0914615	0.0750906
ENSMUSG00000015222	Map2	106	-0.109025	0.862207	-0.0949234	0.548615	-0.076819	0.258129	-0.119079	0.15987
ENSMUSG00000015222	Map2	107	-0.331842	0.522667	-0.318973	0.113339	-0.377771	0.020616	-0.247822	0.0949082
ENSMUSG00000015222	Map2	108	-0.0863808	0.906606	-0.0747962	0.659787	0.140566	0.143992	0.0202851	0.471142
ENSMUSG00000015222	Map2	109	-0.0563169	0.945931	-0.0398232	0.77605	0.013744	0.859812	-0.0786952	0.264933
ENSMUSG00000015222	Map2	110	0.0844583	0.904196	0.0990441	0.688187	0.0581002	0.0798251	0.0116748	0.746831
ENSMUSG00000015222	Map2	111	0.705741	0.0312512	0.722182	0.0121868	-0.0740836	0.0726025	-0.196713	0.040915
ENSMUSG00000015222	Map2	112	0.135232	0.8252	0.148607	0.502884	-0.126566	0.0537115	-0.0999011	0.0932384
ENSMUSG00000015222	Map2	113	-0.139772	0.895759	-0.16086	0.765031	-0.200511	0.003674	-0.222889	0.0649425
ENSMUSG00000015222	Map2	114	-0.311262	0.795625	-0.33157	0.534976	0.0133386	0.843406	-0.0541339	0.218489
ENSMUSG00000015222	Map2	115	-0.171261	0.780261	-0.15708	0.220808	-0.0692275	0.368574	-0.105706	0.116525
ENSMUSG00000015222	Map2	116	-0.296812	0.656243	-0.280737	0.0182766	0.151537	0.068108	0.0627128	0.60583
ENSMUSG00000015222	Map2	117	-0.348023	0.430289	-0.331932	0.00856265	0.177479	0.0497481	0.0790335	0.151462
ENSMUSG00000015222	Map2	118	0.197803	0.817048	0.214363	0.510957	0.0374662	0.629049	0.0847451	0.446353
ENSMUSG00000015222	Map2	119	-0.233294	0.700617	-0.21876	0.386916	0.189136	0.107328	0.235982	0.0181969
ENSMUSG00000015222	Map2	120	-0.47261	0.173506	-0.455046	0.0534888	0.0745146	0.354469	0.0816421	0.00594913
ENSMUSG00000015222	Map2	121	-0.316133	0.503536	-0.300832	0.106158	0.144018	0.167509	0.221222	0.139193
ENSMUSG00000015222	Map2	122	-0.29022	0.543793	-0.27612	0.10736	-0.0249068	0.732396	0.126489	0.337839
ENSMUSG00000015222	Map2	123	0.241477	0.746234	0.2577	0.290047	0.0367992	0.779914	0.0573064	0.48569
ENSMUSG00000015222	Map2	124	-0.221641	0.755897	-0.207349	0.666514	-0.0261269	0.77114	0.171586	0.39393
ENSMUSG00000015222	Map2	125	-1.85806	0.0299721	-1.88687	0.0670505	0.089233	0.112292	0.0255614	0.891415
ENSMUSG00000015222	Map2	126	-0.194788	0.722365	-0.177484	0.232272	-0.157408	0.186522	0.0443271	0.561268
ENSMUSG00000015222	Map2	127	-0.496535	0.288569	-0.488885	0.179116	-0.49148	0.0424328	-0.136234	0.566631
ENSMUSG00000015222	Map2	128	-0.531074	0.167134	-0.516639	0.112244	-0.439714	0.028346	-0.179424	0.343203
ENSMUSG00000015222	Map2	129	-0.696281	0.0921024	-0.681247	0.101465	0.074922	0.270022	0.197659	0.0542439
ENSMUSG00000015222	Map2	130	0.303003	0.728764	0.319074	0.440582	0.310688	0.053466	0.294219	0.0675693
ENSMUSG00000015222	Map2	131	0.201128	0.809986	0.21744	0.542987	0.16965	0.0705373	0.324035	0.099662
ENSMUSG00000015222	Map2	132	-0.628172	0.697809	-0.691032	0.370408	-0.159863	0.132232	0.328668	0.122545
ENSMUSG00000015222	Map2	133	-0.0654481	0.944558	-0.0514942	0.855459	0.0860769	0.19643	0.278445	0.0239666
ENSMUSG00000015222	Map2	134	-0.576801	0.160476	-0.563712	0.0380626	0.138962	0.0140723	0.119043	0.140958
ENSMUSG00000015222	Map2	135	-0.160644	0.757148	-0.144536	0.393987	0.061139	0.0924525	0.151822	0.0696971
ENSMUSG00000015222	Map2	136	0.341827	0.430289	0.356202	0.238145	0.0995112	0.206106	0.0658762	0.238697
ENSMUSG00000015222	Map2	137	0.0493755	0.948656	0.0623421	0.816389	0.0207035	0.805471	0.087971	0.372032
ENSMUSG00000015222	Map2	138	0.0974799	0.880416	0.110934	0.631619	0.0155073	0.316183	0.0481721	0.59525
ENSMUSG00000015222	Map2	139	-0.474005	0.194622	-0.457881	0.0316557	-0.0941	0.178149	-0.0758613	0.406601
ENSMUSG00000015222	Map2	140	-0.0820951	0.898879	-0.0666454	0.685254	-0.122851	0.0337553	0.00408677	0.953886
ENSMUSG00000016252	Atp5e	1	-0.020754	0.982624	-0.00962448	0.965155	0.164289	0.0210814	0.147274	0.0933703
ENSMUSG00000016252	Atp5e	2	0.22043	0.696507	0.235796	0.416568	0.207014	0.00153933	0.0293704	0.630336
ENSMUSG00000016252	Atp5e	3	0.040566	0.959447	0.0530025	0.842905	0.0837336	0.0823271	0.103006	0.0787035
ENSMUSG00000016252	Atp5e	4	0.318643	0.461418	0.334724	0.0447829	0.0858668	0.166257	0.0589152	0.310971
ENSMUSG00000016252	Atp5e	5	0.14224	0.805838	0.158917	0.354275	0.166687	0.0578901	0.105247	0.0683719
ENSMUSG00000016252	Atp5e	6	0.0185321	0.987028	0.0296672	0.914334	0.0359493	0.455981	-0.00547185	0.800417
ENSMUSG00000016427	Ndufa1	1	0.229889	0.629816	0.244315	0.465471	0.0149349	0.0109529	0.0491148	0.48158
ENSMUSG00000016427	Ndufa1	2	0.147058	0.86832	0.165119	0.512495	-0.0436266	0.335981	0.117358	0.364572
ENSMUSG00000016427	Ndufa1	3	0.314377	0.580048	0.321853	0.460477	-0.0383284	0.709328	0.199916	0.373369
ENSMUSG00000016427	Ndufa1	4	0.00611456	0.998697	0.00940805	0.981803	0.105277	0.0567861	0.123679	0.247274
ENSMUSG00000016427	Ndufa1	5	-0.0929281	0.933365	-0.0848276	0.72369	0.199991	0.398655	0.289719	0.209207
ENSMUSG00000017778	Cox7c	1	0.0893655	0.924946	0.106046	0.128869	0.196486	0.0340768	0.0857388	0.145637
ENSMUSG00000017778	Cox7c	2	0.00342645	0.998697	0.0168983	0.960115	-0.0497517	0.541325	-0.0683838	0.380755
ENSMUSG00000017778	Cox7c	3	-0.335459	0.434774	-0.32197	0.092203	0.0887284	0.547968	0.204215	0.128724
ENSMUSG00000017778	Cox7c	4	-0.413578	0.366712	-0.398368	0.214775	0.111507	0.46522	0.176396	0.141897
ENSMUSG00000018593	Sparc	1	1.42794	0.2324	1.42899	0.0654943	NA	NA	NA	NA
ENSMUSG00000018593	Sparc	2	0.843906	0.779591	0	NA	-0.367256	0.695585	0.499494	0.242605
ENSMUSG00000018593	Sparc	3	0.139301	0.888577	0.156294	0.183209	-0.0239442	0.796821	-0.100752	0.279824
ENSMUSG00000018593	Sparc	4	-0.85415	0.245545	-0.840401	0.108178	0.207317	0.0658117	0.104352	0.652033
ENSMUSG00000018593	Sparc	5	0.66978	0.457366	0.680884	0.0820391	0.638875	0.00644541	0.680167	0.0167987
ENSMUSG00000018593	Sparc	6	0.437407	0.516386	0.452482	0.187615	0.360868	0.0613404	0.352352	0.193681
ENSMUSG00000018593	Sparc	7	0.820656	0.0103206	0.836816	0.0294351	0.383799	0.0141838	0.450458	0.0120717
ENSMUSG00000018593	Sparc	8	0.556875	0.0387088	0.571924	0.0305305	-0.00295399	0.718277	-0.00328541	0.887586
ENSMUSG00000018593	Sparc	9	0.519493	0.166845	0.536198	0.0315654	-0.0782865	0.0122905	-0.0702956	0.253834
ENSMUSG00000018593	Sparc	10	0.534546	0.402146	0.543361	0.195006	0.0255398	0.468122	0.0193194	0.608161
ENSMUSG00000018593	Sparc	11	0.601373	0.142138	0.616759	0.00201591	0.0596113	0.148156	-0.0765874	0.0962172
ENSMUSG00000018593	Sparc	12	0.28897	0.483732	0.301477	0.257162	-0.000325494	0.992543	-0.0437247	0.139428
ENSMUSG00000018593	Sparc	13	0.0676383	0.916264	0.0845221	0.593775	-0.0555831	0.120401	-0.134899	0.0111277
ENSMUSG00000018593	Sparc	14	-0.129132	0.807116	-0.116284	0.482095	-0.314167	0.0114639	-0.291846	0.00280764
ENSMUSG00000018593	Sparc	15	-0.586412	0.220544	-0.584696	0.241368	-0.0793294	0.00984107	-0.0510455	0.432097
ENSMUSG00000018593	Sparc	16	0.382933	0.506025	0.398512	0.0403785	0.043215	0.463525	-0.0100036	0.892289
ENSMUSG00000018593	Sparc	17	-0.31144	0.714511	-0.298437	0.538692	-0.0175639	0.408095	0.00197593	0.910926
ENSMUSG00000018593	Sparc	18	-0.168807	0.796926	-0.160763	0.598635	0.166869	0.060357	0.139067	0.045954
ENSMUSG00000018593	Sparc	19	0.0443911	0.959447	0.0551109	0.825125	0.200038	0.0660666	0.11511	0.251297
ENSMUSG00000018593	Sparc	20	0.289279	0.592647	0.303925	0.067007	0.237412	0.00186174	0.0962933	0.120849
ENSMUSG00000018593	Sparc	21	0.0910374	0.90042	0.108263	0.476842	0.296659	0.0114575	0.173762	0.00238172
ENSMUSG00000018593	Sparc	22	0.263333	0.538208	0.278908	0.0311722	0.214131	0.0174134	0.0997532	0.0810418
ENSMUSG00000018593	Sparc	23	0.213912	0.58951	0.229309	0.152523	-0.0210873	0.338313	0.0309196	0.408653
ENSMUSG00000018593	Sparc	24	0.0964985	0.961673	0.104341	0.887238	0.0554156	0.204371	0.041038	0.402789
ENSMUSG00000018593	Sparc	25	0.519085	0.185188	0.534189	0.00939105	0.143222	0.065741	0.107283	0.0133656
ENSMUSG00000018593	Sparc	26	0.36307	0.523506	0.370512	0.394704	-0.155715	0.222669	-0.277438	0.0100178
ENSMUSG00000018593	Sparc	27	0.262329	0.739888	0.26131	0.637655	-0.0903109	0.1112	-0.33601	0.00451327
ENSMUSG00000018593	Sparc	28	0.533567	0.33616	0.547643	0.192483	0.248343	0.00403352	0.172689	0.0579398
ENSMUSG00000018593	Sparc	29	0.720406	0.238485	0.733177	0.152567	0.0132205	0.77439	0.0336495	0.0875619
ENSMUSG00000018593	Sparc	30	-0.0825761	0.947193	-0.0639016	0.915696	0.0689751	0.304176	0.00290793	0.946448
ENSMUSG00000018593	Sparc	31	-0.257879	0.615684	-0.240781	0.126263	0.113807	0.0778957	0.0243375	0.753454
ENSMUSG00000018593	Sparc	32	-0.177509	0.675059	-0.161401	0.111286	-0.0378564	0.205599	-0.0183921	0.786657
ENSMUSG00000018593	Sparc	33	1.78944	1.25e-05	1.80484	0.00325888	0.22945	0.357299	0.386327	0.0285431
ENSMUSG00000018593	Sparc	34	1.85507	0.0446295	1.86815	0.0166937	0.310653	0.567593	0.240444	0.157035
ENSMUSG00000018593	Sparc	35	1.95378	0.000122449	1.9698	0.00228661	0.120198	0.79059	0.353809	0.268217
ENSMUSG00000018593	Sparc	36	-0.0452339	0.947442	-0.0302815	0.621291	-0.128791	0.0261659	-0.0741841	0.0384891
ENSMUSG00000018593	Sparc	37	0.141499	0.81497	0.159347	0.47881	0.0599632	0.505141	0.00660494	0.437359
ENSMUSG00000018593	Sparc	38	0.0171784	0.986471	0.033549	0.819029	0.0417362	0.404663	-0.0508103	0.444645
ENSMUSG00000018593	Sparc	39	-0.0376689	0.961846	-0.0221082	0.928119	-0.0161702	0.473553	0.00980738	0.738898
ENSMUSG00000018593	Sparc	40	-0.255352	0.594284	-0.238395	0.389404	-0.0796427	0.264133	-0.0522388	0.304242
ENSMUSG00000018819	Lsp1	1	0.00444788	0.998697	0.0167439	0.946937	-0.190486	0.0467692	-0.220178	0.0641065
ENSMUSG00000018819	Lsp1	2	0.310287	0.430289	0.322533	0.278453	-0.15578	0.0576158	-0.13311	0.0945377
ENSMUSG00000018819	Lsp1	3	0.579859	0.0317288	0.595729	0.00455419	0.00725775	0.820394	0.0374519	0.0842035
ENSMUSG00000018819	Lsp1	4	0.292224	0.384089	0.307176	0.0766965	-0.136586	0.00481867	-0.126907	0.0265363
ENSMUSG00000018819	Lsp1	5	0.409739	0.111298	0.425175	0.057735	0.102903	0.0534861	0.125416	0.0523007
ENSMUSG00000018819	Lsp1	6	0.24956	0.528009	0.263877	0.206064	0.043475	0.205709	0.0373918	0.0366842
ENSMUSG00000018819	Lsp1	7	-0.085734	0.907166	-0.0699913	0.697758	-0.229868	0.05377	-0.158105	0.0601195
ENSMUSG00000018819	Lsp1	8	0.173175	0.807763	0.186753	0.330372	0.166633	0.0664289	0.132036	0.153113
ENSMUSG00000018819	Lsp1	9	-0.00105493	0.998697	0.0112269	0.956956	0.0808348	0.108024	0.00187384	0.946991
ENSMUSG00000018819	Lsp1	10	0.26634	0.663566	0.284828	0.411727	-0.0927056	0.0625071	-0.104451	0.0560356
ENSMUSG00000018819	Lsp1	11	0.437877	0.35333	0.454764	0.0402569	0.233041	0.00353184	0.0921836	0.028242
ENSMUSG00000018819	Lsp1	12	0.0877395	0.933365	0.09914	0.833139	-0.0610771	0.222628	-0.0253322	0.00516331
ENSMUSG00000018819	Lsp1	13	0.306438	0.716115	0.314747	0.359348	-0.0319078	0.521195	-0.0853557	0.116434
ENSMUSG00000018819	Lsp1	14	-0.396377	0.529173	-0.378893	0.209131	-0.044945	0.469444	-0.0918135	0.139175
ENSMUSG00000018819	Lsp1	15	-0.251962	0.697546	-0.249922	0.490136	0.107671	0.165568	0.0089718	0.855555
ENSMUSG00000018819	Lsp1	16	-0.699019	0.201303	-0.703171	0.14542	-0.275651	0.082003	-0.160116	0.078902
ENSMUSG00000018819	Lsp1	17	0.0159754	0.988416	0.0316485	0.892492	0.079833	0.0180379	0.0389864	0.232188
ENSMUSG00000018819	Lsp1	18	-0.4587	0.457219	-0.468223	0.435063	-0.00445653	0.884976	-0.0534763	0.059267
ENSMUSG00000018819	Lsp1	19	-1.05801	0.226147	-1.09927	0.183417	-0.411491	0.0415565	-0.313947	0.00794781
ENSMUSG00000018819	Lsp1	20	-0.584192	0.311929	-0.562823	0.178503	-0.0154424	0.745576	-0.0709438	0.0183504
ENSMUSG00000018819	Lsp1	21	-0.388618	0.554926	-0.380556	0.176792	-0.216134	0.0152048	-0.170982	0.0506134
ENSMUSG00000018819	Lsp1	22	0.346165	0.41358	0.360638	0.0300082	0.0350349	0.244351	-0.0446029	0.280028
ENSMUSG00000018819	Lsp1	23	0.323845	0.359054	0.33998	0.1293	-0.010359	0.802013	-0.00222059	0.924298
ENSMUSG00000019820	Utrn	1	-0.178553	0.704358	-0.163435	0.175118	-0.159275	0.076539	-0.0986241	0.00804378
ENSMUSG00000019820	Utrn	2	-0.163802	0.773001	-0.152571	0.609792	-0.443115	0.00339351	-0.20885	0.102047
ENSMUSG00000019820	Utrn	3	0.418739	0.295056	0.434562	0.116363	0.21046	0.0217995	0.130769	0.0540042
ENSMUSG00000019820	Utrn	4	0.307763	0.663566	0.324072	0.336714	0.198617	0.0689	0.120445	0.0297272
ENSMUSG00000019820	Utrn	5	-0.415205	0.395328	-0.399215	0.210157	0.049985	0.197489	0.0538762	0.361481
ENSMUSG00000019820	Utrn	6	0.0185438	0.986013	0.0354951	0.917277	-0.0503279	0.495149	0.0264924	0.668354
ENSMUSG00000019820	Utrn	7	0.0134571	0.993126	0.0270007	0.925849	-0.210846	0.0480606	-0.0652258	0.169712
ENSMUSG00000019820	Utrn	8	-0.0135732	0.991256	0.00302313	0.992472	-0.129201	0.092756	-0.0294478	0.636619
ENSMUSG00000019820	Utrn	9	-0.18697	0.75987	-0.169436	0.52763	-0.108181	0.0316592	-0.0853746	0.367942
ENSMUSG00000019820	Utrn	10	-0.371885	0.455474	-0.358007	0.312647	-0.291788	0.0416511	-0.120627	0.469494
ENSMUSG00000019820	Utrn	11	-0.349153	0.364655	-0.332778	0.220831	-0.198165	0.0162496	0.0316869	0.661282
ENSMUSG00000019820	Utrn	12	-0.52446	0.121397	-0.508702	0.0210138	-0.103244	0.317689	0.156748	0.0334399
ENSMUSG00000019820	Utrn	13	-0.771349	0.0432767	-0.754869	0.0621936	0.0349815	0.503271	0.0412691	0.684663
ENSMUSG00000019820	Utrn	14	-0.0618694	0.923933	-0.0453106	0.84452	0.000804516	0.988157	-0.00429511	0.942276
ENSMUSG00000019820	Utrn	15	-0.031436	0.959447	-0.0147081	0.926785	0.0128372	0.863499	0.141907	0.210314
ENSMUSG00000019820	Utrn	16	-0.173271	0.686471	-0.15701	0.260162	-0.0586885	0.445842	-0.0236812	0.746177
ENSMUSG00000019820	Utrn	17	-0.0594862	0.942536	-0.0460688	0.770614	-0.0268701	0.58318	0.0926799	0.530036
ENSMUSG00000019820	Utrn	18	0.169763	0.744137	0.186412	0.380691	0.082564	0.214284	0.29064	0.0363494
ENSMUSG00000019820	Utrn	19	-0.0655861	0.916264	-0.0491917	0.787726	0.154175	0.0395024	0.0716614	0.0791259
ENSMUSG00000019820	Utrn	20	0.0474124	0.943774	0.0623683	0.598229	0.315459	0.00617544	0.339174	0.0125729
ENSMUSG00000019820	Utrn	21	-0.138122	0.774069	-0.121617	0.547052	0.265009	0.0162167	0.244067	0.0375571
ENSMUSG00000019820	Utrn	22	0.0584163	0.940501	0.0746044	0.711793	0.272818	0.00851171	0.285021	0.0708999
ENSMUSG00000019820	Utrn	23	-0.264788	0.702598	-0.256645	0.382343	0.288852	0.00753147	0.31094	0.00158138
ENSMUSG00000019820	Utrn	24	0.128938	0.796755	0.145217	0.315922	0.0363145	0.282238	0.272982	0.123998
ENSMUSG00000019820	Utrn	25	-0.0895528	0.904688	-0.074128	0.833466	0.121951	0.000536365	0.120099	0.232891
ENSMUSG00000019820	Utrn	26	-0.281908	0.606206	-0.26853	0.462743	0.0167308	0.215608	0.00235146	0.94542
ENSMUSG00000019820	Utrn	27	-0.379645	0.363218	-0.363124	0.180862	-0.155016	0.0724806	-0.0675693	0.156348
ENSMUSG00000019820	Utrn	28	-0.259214	0.562301	-0.244024	0.162824	-0.260934	0.0616582	-0.133876	0.176701
ENSMUSG00000019820	Utrn	29	0.143541	0.755186	0.159113	0.331189	-0.109107	0.118979	-0.0624202	0.0347047
ENSMUSG00000019820	Utrn	30	-0.455707	0.506625	-0.447216	0.429398	-0.179917	0.16222	-0.0124118	0.875862
ENSMUSG00000019820	Utrn	31	-0.11424	0.845236	-0.0985745	0.495975	0.138055	0.204645	0.179833	0.0501094
ENSMUSG00000019820	Utrn	32	-0.520871	0.338951	-0.504609	0.00509668	-0.0332492	0.344079	0.150475	0.163872
ENSMUSG00000019820	Utrn	33	-0.0317147	0.961846	-0.017161	0.940363	0.0744429	0.508557	0.185009	0.0839118
ENSMUSG00000019820	Utrn	34	0.1367	0.793298	0.153393	0.321392	-0.131117	0.0384298	0.0327274	0.810991
ENSMUSG00000019820	Utrn	35	-0.120469	0.877519	-0.105947	0.701641	0.127726	0.0223436	-0.0241886	0.644028
ENSMUSG00000019820	Utrn	36	-0.222816	0.663423	-0.207931	0.0790237	-0.360837	0.0446393	-0.283424	0.0367235
ENSMUSG00000019820	Utrn	37	-0.0455641	0.959447	-0.0340921	0.851826	-0.0466956	0.0197959	-0.0700774	0.18133
ENSMUSG00000019820	Utrn	38	-0.460732	0.259732	-0.447094	0.187746	-0.111783	0.0545468	-0.184488	0.0546646
ENSMUSG00000019820	Utrn	39	-0.0818572	0.8792	-0.0667543	0.583011	-0.263445	0.0158882	-0.0676612	0.623902
ENSMUSG00000019820	Utrn	40	-0.179036	0.756408	-0.164637	0.662611	-0.287171	0.023246	-0.201074	0.151857
ENSMUSG00000019820	Utrn	41	-0.0927448	0.884072	-0.0760683	0.429991	-0.166657	0.0131664	-0.124807	0.281016
ENSMUSG00000019820	Utrn	42	0.162036	0.773001	0.175029	0.465814	0.138014	0.0409151	0.0664838	0.056976
ENSMUSG00000019820	Utrn	43	0.556514	0.0999263	0.569751	0.109529	0.191282	0.0166939	0.0879603	0.139549
ENSMUSG00000019820	Utrn	44	0.272732	0.587824	0.288745	0.0142127	0.113937	0.00496521	0.0443167	0.523158
ENSMUSG00000019820	Utrn	45	0.681428	0.0451829	0.69531	0.0294357	0.200152	0.065912	0.122666	0.0026113
ENSMUSG00000019820	Utrn	46	-0.0718963	0.965842	-0.0568151	0.941118	-0.46773	0.0972885	-0.421544	0.105449
ENSMUSG00000019820	Utrn	47	0.291401	0.619121	0.301087	0.297794	-0.263624	0.00687017	-0.215213	0.00650759
ENSMUSG00000019820	Utrn	48	0.16824	0.773064	0.183455	0.506877	-0.185772	0.0232181	-0.179776	0.165528
ENSMUSG00000019820	Utrn	49	-0.395575	0.442772	-0.38056	0.0680402	-0.010477	0.756233	0.0674795	0.489087
ENSMUSG00000019820	Utrn	50	-0.552995	0.445654	-0.539627	0.104039	0.128211	0.138475	0.0101079	0.866425
ENSMUSG00000019820	Utrn	51	-0.188127	0.91194	-0.175854	0.654383	0.266876	0.0161652	0.366762	0.0765888
ENSMUSG00000019820	Utrn	52	-0.11711	0.896358	-0.0989763	0.615366	0.322011	0.045418	0.279215	0.124132
ENSMUSG00000019820	Utrn	53	-0.603573	0.0821905	-0.589325	0.0368793	-0.100997	0.0692294	0.0480456	0.489708
ENSMUSG00000019820	Utrn	54	-0.42703	0.222951	-0.410185	0.0446921	-0.272029	0.126541	-0.114948	0.423881
ENSMUSG00000019820	Utrn	55	-0.376331	0.41452	-0.36026	0.165893	-0.0367024	0.637609	-0.0181643	0.845967
ENSMUSG00000019820	Utrn	56	-0.464772	0.442772	-0.451031	0.196665	-0.0158518	0.822466	-0.170613	0.0623233
ENSMUSG00000019820	Utrn	57	-0.238599	0.599779	-0.222965	0.00840739	0.0372504	0.418993	0.0808354	0.158963
ENSMUSG00000019820	Utrn	58	-0.0187815	0.988571	-0.00147182	0.99373	0.248073	0.0398204	0.150173	0.0817934
ENSMUSG00000019820	Utrn	59	-0.496991	0.226092	-0.480163	0.101937	0.0390211	0.720272	0.131195	0.0676652
ENSMUSG00000019820	Utrn	60	0.479397	0.227236	0.491634	0.136971	0.394913	0.00208334	0.457633	0.00437411
ENSMUSG00000019820	Utrn	61	1.72319	1.96e-11	1.7394	0.0289683	0.313088	0.076519	0.412217	0.0650373
ENSMUSG00000019820	Utrn	62	0.640886	0.16453	0.659046	0.0308546	0.183878	0.0219167	0.230199	0.0689566
ENSMUSG00000019820	Utrn	63	0.708752	0.0470644	0.722338	0.0424647	0.257069	0.047428	0.197537	0.0161879
ENSMUSG00000019820	Utrn	64	-0.0737719	0.933365	-0.0647109	0.843578	0.0832715	0.0107806	-0.0571875	0.217266
ENSMUSG00000019820	Utrn	65	-0.156855	0.81468	-0.140474	0.515257	0.0647246	0.190241	0.0838201	0.0411746
ENSMUSG00000019820	Utrn	66	-0.15851	0.766908	-0.139947	0.466834	0.160785	0.0074405	0.0911037	0.147951
ENSMUSG00000019820	Utrn	67	-0.515977	0.363218	-0.509131	0.351744	0.0927607	0.206605	0.0805488	0.17074
ENSMUSG00000019820	Utrn	68	-0.165092	0.695483	-0.148905	0.0957506	-0.0252985	0.319543	-0.0261964	0.578268
ENSMUSG00000019820	Utrn	69	0.0521623	0.934852	0.068689	0.722897	-0.132446	0.125811	-0.0433845	0.625152
ENSMUSG00000019820	Utrn	70	-0.104027	0.884207	-0.0871688	0.665338	-0.134382	0.198714	-0.113844	0.430809
ENSMUSG00000019820	Utrn	71	-0.184296	0.755186	-0.168668	0.534211	-0.0925137	0.170043	-0.0580328	0.20544
ENSMUSG00000019820	Utrn	72	-0.264573	0.546068	-0.247986	0.210014	0.262129	0.0522052	0.0941721	0.0139744
ENSMUSG00000019820	Utrn	73	-1.04962	0.0503396	-1.03502	6.47144e-05	0.23288	0.273327	0.139957	0.0803193
ENSMUSG00000019820	Utrn	74	-0.372917	0.516386	-0.357489	0.369462	0.539014	0.00877496	-0.0447483	0.728427
ENSMUSG00000019820	Utrn	75	-0.393335	0.402725	-0.375455	0.291183	0.304237	0.0248381	0.121889	0.00258877
ENSMUSG00000019820	Utrn	76	-0.407019	0.310184	-0.389534	0.0834997	-0.0771665	0.321484	0.157452	0.0465211
ENSMUSG00000019820	Utrn	77	-0.268298	0.59896	-0.250958	0.340981	0.0781049	0.166975	0.0915933	0.216819
ENSMUSG00000020022	Ndufa12	1	-0.383729	0.474063	-0.365799	0.189499	-0.0408193	0.497633	-0.0683446	0.164651
ENSMUSG00000020022	Ndufa12	2	-0.358245	0.506025	-0.35248	0.359146	-0.0239519	0.517203	-0.0737823	0.354168
ENSMUSG00000020022	Ndufa12	3	-0.114647	0.855038	-0.0982816	0.366326	-0.0247743	0.653179	-0.0786421	0.0219392
ENSMUSG00000020022	Ndufa12	4	0.0386695	0.961846	0.0554807	0.677812	0.216959	0.0393072	0.131355	0.0362017
ENSMUSG00000020022	Ndufa12	5	-0.606002	0.0500882	-0.590688	0.064446	0.0276647	0.529312	0.00564296	0.945594
ENSMUSG00000020022	Ndufa12	6	-0.956351	0.113381	-0.954898	0.248028	0.0984575	0.052792	0.180202	0.162354
ENSMUSG00000020022	Ndufa12	7	0.178315	0.860502	0.197592	0.779444	0.0418029	0.550962	0.105837	0.230655
ENSMUSG00000020022	Ndufa12	8	-0.0708078	0.937802	-0.0673762	0.866691	0.0741747	0.0171849	0.0636706	0.596578
ENSMUSG00000020022	Ndufa12	9	-0.00724959	0.998697	0.000476774	0.998622	-0.0903085	0.302258	-0.020839	0.365588
ENSMUSG00000020022	Ndufa12	10	-0.441578	0.406604	-0.432511	0.395612	-0.0633722	0.270431	-0.0788901	0.386619
ENSMUSG00000020022	Ndufa12	11	-0.00932778	0.996185	0.00306216	0.988172	0.105119	0.170681	0.0541515	0.247554
ENSMUSG00000020022	Ndufa12	12	0.0141859	0.988416	0.0308429	0.819458	0.0377967	0.204034	-0.0201293	0.635965
ENSMUSG00000020022	Ndufa12	13	-0.179616	0.82737	-0.172915	0.678859	-0.0490792	0.19414	7.39e-05	0.999225
ENSMUSG00000020022	Ndufa12	14	-0.287368	0.588879	-0.278389	0.327837	-0.205615	0.0348394	-0.258907	0.0267537
ENSMUSG00000020022	Ndufa12	15	0.0747209	0.916264	0.0894665	0.396093	-0.369885	0.0343506	-0.337215	0.00309642
ENSMUSG00000020022	Ndufa12	16	-0.218189	0.615132	-0.204805	0.275851	-0.756711	0.000602223	-0.679608	0.0110091
ENSMUSG00000020022	Ndufa12	17	-0.12989	0.794688	-0.114872	0.132538	-0.980009	0.00120836	-0.807325	0.00188452
ENSMUSG00000020022	Ndufa12	18	-0.176751	0.652052	-0.161134	0.112121	-0.517107	0.00383605	-0.490352	0.0206626
ENSMUSG00000020022	Ndufa12	19	-0.808703	0.0272697	-0.793948	0.0921004	-0.0824645	0.0816959	-0.0648638	0.225823
ENSMUSG00000020022	Ndufa12	20	-0.689964	0.129099	-0.670517	0.0487197	-0.184263	0.0627826	-0.134989	0.0525772
ENSMUSG00000020163	Uqcr11	1	0.48485	0.26227	0.498431	0.0631744	0.0123088	0.649096	-0.0514061	0.259844
ENSMUSG00000020163	Uqcr11	2	0.249304	0.635022	0.262973	0.185336	0.173319	0.044475	0.11412	0.0680812
ENSMUSG00000020163	Uqcr11	3	0.0900331	0.909632	0.10453	0.572781	0.169123	0.0597586	0.161927	0.0642496
ENSMUSG00000020163	Uqcr11	4	0.187992	0.773001	0.202167	0.408999	0.131363	0.0186589	0.0364618	0.129786
ENSMUSG00000020163	Uqcr11	5	0.321596	0.592647	0.336671	0.0380155	0.101576	0.0282678	0.0272908	0.790194
ENSMUSG00000020163	Uqcr11	6	-0.0424433	0.947193	-0.027131	0.759964	-0.090202	0.0408389	-0.03894	0.265407
ENSMUSG00000020163	Uqcr11	7	-0.0981605	0.923933	-0.0975384	0.850638	0.163332	0.0614019	0.118239	0.140187
ENSMUSG00000020163	Uqcr11	8	0.537706	0.35901	0.545775	0.307691	0.0532403	0.134864	-0.00519576	0.292513
ENSMUSG00000020163	Uqcr11	9	-0.104295	0.873281	-0.0889153	0.409452	0.086012	0.0141176	0.0224979	0.596783
ENSMUSG00000020431	Adcy1	1	0.131526	0.818106	0.148481	0.429066	0.0889459	0.132396	0.0721855	0.165036
ENSMUSG00000020431	Adcy1	2	0.65028	0.168014	0.663828	0.0288554	0.314122	0.00389877	0.210162	0.0321069
ENSMUSG00000020431	Adcy1	3	0.379962	0.553994	0.390396	0.251138	0.289858	0.00288226	0.194315	0.033429
ENSMUSG00000020431	Adcy1	4	-0.207755	0.817394	-0.205023	0.653707	0.0822509	0.237053	-0.0338554	0.509834
ENSMUSG00000020431	Adcy1	5	-0.18157	0.839195	-0.165528	0.517071	-0.136972	0.0320412	-0.166005	0.150298
ENSMUSG00000020431	Adcy1	6	-0.0668302	0.940501	-0.0529431	0.732453	-0.0517623	0.270458	-0.0589506	0.449859
ENSMUSG00000020431	Adcy1	7	-0.0354998	0.970285	-0.0224741	0.931079	-0.00618781	0.854025	-0.0486593	0.506265
ENSMUSG00000020431	Adcy1	8	-0.106309	0.909032	-0.104078	0.828062	-0.00520425	0.843926	-0.0545795	0.589532
ENSMUSG00000020431	Adcy1	9	0.301731	0.616858	0.317608	0.047308	0.0650134	0.0482479	-0.0262093	0.542374
ENSMUSG00000020431	Adcy1	10	0.587572	0.165297	0.598814	0.0936252	0.14507	0.0461676	0.169908	0.030206
ENSMUSG00000020431	Adcy1	11	0.312378	0.55962	0.323512	0.319126	0.162798	0.0414537	0.0551855	0.144646
ENSMUSG00000020431	Adcy1	12	-0.0659829	0.942606	-0.0480957	0.920595	0.0798344	0.230695	0.0509293	0.359529
ENSMUSG00000020431	Adcy1	13	-0.0751511	0.917579	-0.0628367	0.846212	-0.0578066	0.0657824	-0.0270778	0.284841
ENSMUSG00000020431	Adcy1	14	0.0125242	0.993126	0.0241897	0.890589	0.104988	0.140741	0.180464	0.204478
ENSMUSG00000020431	Adcy1	15	-0.274262	0.528249	-0.259569	0.0520171	-0.125802	0.0993843	-0.0630009	0.238151
ENSMUSG00000020431	Adcy1	16	-0.0499876	0.951805	-0.0347915	0.5446	0.196879	0.00822309	0.152774	0.00266972
ENSMUSG00000020431	Adcy1	17	-0.0965871	0.90267	-0.0841301	0.614136	0.142082	0.103051	0.112683	0.00728024
ENSMUSG00000020431	Adcy1	18	-0.0257871	0.982719	-0.00411528	0.994311	0.0109456	0.868467	0.00882401	0.712814
ENSMUSG00000020431	Adcy1	19	0.0912675	0.935704	0.101432	0.795335	0.154697	0.0335463	-0.00689891	0.66146
ENSMUSG00000020431	Adcy1	20	0.534906	0.378317	0.549093	0.0355883	0.144594	0.0329028	0.122424	0.293044
ENSMUSG00000020431	Adcy1	21	-0.0642147	0.947771	-0.0595099	0.877478	0.131504	0.0160002	0.0637201	0.274933
ENSMUSG00000020431	Adcy1	22	0.446756	0.402146	0.463685	0.0487411	-0.043014	0.0273284	0.0438992	0.0462001
ENSMUSG00000020431	Adcy1	23	0.772124	0.080811	0.786749	0.0166215	0.249181	0.000941813	0.224705	0.0757568
ENSMUSG00000020431	Adcy1	24	0.16106	0.7901	0.172191	0.448119	0.186985	0.066327	0.206554	0.120394
ENSMUSG00000020431	Adcy1	25	-0.158973	0.808071	-0.143564	0.413596	0.0704769	0.349168	-0.00626618	0.732105
ENSMUSG00000020431	Adcy1	26	0.101928	0.906787	0.105664	0.715445	-0.418475	0.00218818	-0.22798	0.0246396
ENSMUSG00000020431	Adcy1	27	0.403526	0.358862	0.419827	0.00542233	-0.354142	0.0406718	-0.21423	0.0139949
ENSMUSG00000020431	Adcy1	28	0.528511	0.0632387	0.542857	0.0431488	0.00749328	0.91119	-0.00777242	0.859088
ENSMUSG00000020431	Adcy1	29	0.0326902	0.961846	0.043264	0.889847	-0.1093	0.00373484	0.0047712	0.773242
ENSMUSG00000020431	Adcy1	30	-0.096875	0.88067	-0.0854769	0.728212	-0.263422	0.0429364	-0.158195	0.153144
ENSMUSG00000020431	Adcy1	31	-0.325873	0.53092	-0.316556	0.235364	-0.240995	0.0748427	-0.197199	0.0202195
ENSMUSG00000020431	Adcy1	32	0.387584	0.612199	0.397033	0.25806	-0.0834536	0.260551	-0.0806223	0.386508
ENSMUSG00000020431	Adcy1	33	0.244271	0.686191	0.253163	0.406805	-0.048968	0.496157	-0.0847272	0.0183891
ENSMUSG00000020431	Adcy1	34	0.102427	0.892547	0.118947	0.241591	-0.0232542	0.835408	0.00486216	0.928858
ENSMUSG00000020431	Adcy1	35	-0.292535	0.551658	-0.278238	0.106126	-0.25273	0.09731	-0.196704	0.0706969
ENSMUSG00000020431	Adcy1	36	-0.986948	0.538072	-1.48447	0.488863	-0.725076	0.0609014	-0.610739	0.074254
ENSMUSG00000020431	Adcy1	37	-0.205913	0.714384	-0.198053	0.487904	-0.169293	0.0752871	-0.0599337	0.0274013
ENSMUSG00000020431	Adcy1	38	0.161382	0.849352	0.163186	0.696182	-0.238653	0.0422601	-0.183209	0.0255911
ENSMUSG00000020431	Adcy1	39	-0.198404	0.86395	-0.196766	0.751788	-0.17792	0.297437	-0.322074	0.101906
ENSMUSG00000020431	Adcy1	40	0.233787	0.787011	0.2472	0.648903	-0.114103	0.280855	-0.0409812	0.426702
ENSMUSG00000020431	Adcy1	41	-0.198813	0.924946	-0.207861	0.635576	-0.899945	0.0714139	-0.607515	0.0415559
ENSMUSG00000020431	Adcy1	42	0.253732	0.620756	0.266024	0.306422	0.0365427	0.519251	-0.00594536	0.911088
ENSMUSG00000020431	Adcy1	43	0.303721	0.580222	0.32054	0.181392	-0.0801731	0.0875712	-0.0197965	0.58235
ENSMUSG00000020431	Adcy1	44	0.2289	0.667742	0.242438	0.183242	0.143518	0.019071	0.0613522	0.000641716
ENSMUSG00000020431	Adcy1	45	0.129071	0.893308	0.140441	0.506433	0.196965	0.0122383	0.109483	0.0863948
ENSMUSG00000020431	Adcy1	46	0.28298	0.726998	0.290347	0.211834	0.343457	0.0545005	0.128883	0.0406154
ENSMUSG00000020431	Adcy1	47	0.168972	0.839923	0.184305	0.112469	0.173466	0.138776	0.130802	0.105614
ENSMUSG00000020431	Adcy1	48	-0.553161	0.571042	-0.563092	0.419681	0.0399059	0.0695134	0.101919	0.298432
ENSMUSG00000020431	Adcy1	49	0.402506	0.429473	0.415235	0.083402	0.161077	0.0114249	0.00985564	0.858195
ENSMUSG00000020431	Adcy1	50	0.146902	0.78718	0.163365	0.189121	0.0148377	0.446609	-0.0462112	0.315246
ENSMUSG00000020431	Adcy1	51	0.52335	0.181738	0.539662	0.0357428	0.052445	0.275188	0.031881	0.72869
ENSMUSG00000020431	Adcy1	52	0.345044	0.43362	0.361472	0.118215	0.0632183	0.17895	-0.0105005	0.87657
ENSMUSG00000020431	Adcy1	53	0.170304	0.750075	0.185017	0.337656	0.0691906	0.0950827	0.0631221	0.0523321
ENSMUSG00000020431	Adcy1	54	-0.077533	0.935121	-0.0686742	0.863567	-0.0537516	0.108678	-0.0711809	0.00730851
ENSMUSG00000020431	Adcy1	55	-0.386539	0.623574	-0.36824	0.205161	-0.356919	0.0193831	-0.389065	0.0204334
ENSMUSG00000020431	Adcy1	56	-0.198521	0.879572	-0.202905	0.803033	-0.249236	0.01144	-0.225445	0.003824
ENSMUSG00000020431	Adcy1	57	0.216956	0.769182	0.227418	0.415627	0.125671	0.088728	0.0147034	0.724861
ENSMUSG00000020431	Adcy1	58	0.241581	0.654598	0.257531	0.193891	0.069273	0.110509	-0.0139101	0.743003
ENSMUSG00000020431	Adcy1	59	0.296559	0.518329	0.313436	0.115508	0.0468687	0.0192588	0.0102584	0.785371
ENSMUSG00000020431	Adcy1	60	-0.519798	0.563736	-0.588948	0.512485	0.116682	0.0601353	0.0711443	0.0531273
ENSMUSG00000020431	Adcy1	61	0.100534	0.89615	0.116323	0.166999	-0.0665451	0.249261	-0.0882746	0.149271
ENSMUSG00000020431	Adcy1	62	-0.143267	0.840293	-0.12877	0.167714	0.0826967	0.0532256	0.0523653	0.520435
ENSMUSG00000020431	Adcy1	63	0.503026	0.296356	0.521273	0.161307	0.089462	0.00143671	0.01483	0.719751
ENSMUSG00000020431	Adcy1	64	0.283025	0.684999	0.291576	0.607214	0.0991043	0.0926655	0.052536	0.0792345
ENSMUSG00000020431	Adcy1	65	-0.259509	0.697809	-0.239162	0.590028	0.0816577	0.0827813	0.0624677	0.475393
ENSMUSG00000020431	Adcy1	66	-0.0996534	0.912196	-0.0830352	0.604567	0.0930193	0.0969765	0.0666044	0.37232
ENSMUSG00000020431	Adcy1	67	-0.0879713	0.880609	-0.0719004	0.0604964	-0.0137048	0.72954	-0.0864609	0.303915
ENSMUSG00000020431	Adcy1	68	0.0869092	0.896358	0.100968	0.486879	-0.0518839	0.507293	-0.0761715	0.137869
ENSMUSG00000020431	Adcy1	69	0.141411	0.820821	0.153375	0.484061	0.00992349	0.856252	-0.0703324	0.305134
ENSMUSG00000020431	Adcy1	70	0.202173	0.785175	0.206282	0.565979	-0.172285	0.0281115	-0.241565	0.0250391
ENSMUSG00000020431	Adcy1	71	0.0942009	0.89431	0.106465	0.571953	0.150061	0.0578309	0.0543231	0.0706824
ENSMUSG00000020431	Adcy1	72	0.117972	0.882602	0.133577	0.747048	0.251074	0.0245044	0.192862	0.047296
ENSMUSG00000020431	Adcy1	73	0.305475	0.489263	0.319105	0.241201	0.131371	0.0604337	0.0294847	0.575909
ENSMUSG00000020431	Adcy1	74	0.0090705	0.997987	0.0255733	0.923404	0.0487199	0.24393	0.0553781	0.184568
ENSMUSG00000020431	Adcy1	75	0.0833172	0.928587	0.101116	0.849845	-0.0637906	0.0544312	-0.125025	0.141622
ENSMUSG00000020431	Adcy1	76	0.15851	0.849442	0.180014	0.767237	-0.00423446	0.941177	0.0313128	0.400096
ENSMUSG00000020431	Adcy1	77	0.0141378	0.99432	0.0187689	0.968876	0.0437414	0.00827021	0.129296	0.0578831
ENSMUSG00000020431	Adcy1	78	0.32256	0.560873	0.334787	0.163174	0.18857	0.0205217	0.175332	0.125087
ENSMUSG00000020431	Adcy1	79	-0.00200724	0.998697	0.00948841	0.983581	0.0765678	0.0977069	0.0444077	0.304639
ENSMUSG00000020431	Adcy1	80	-0.0211187	0.981942	-0.00263	0.98957	0.105847	0.15554	0.093564	0.113179
ENSMUSG00000020431	Adcy1	81	0.0030006	0.998697	0.0150635	0.918235	0.101916	0.287573	0.105706	0.238489
ENSMUSG00000020431	Adcy1	82	0.191803	0.727843	0.207017	0.359916	0.130409	0.0237894	0.109405	0.0414461
ENSMUSG00000020431	Adcy1	83	0.234015	0.551701	0.248211	0.177617	0.0235806	0.323365	0.0157244	0.485539
ENSMUSG00000020431	Adcy1	84	0.544368	0.105281	0.559228	0.0259565	0.0331593	0.392725	0.0127624	0.741926
ENSMUSG00000020431	Adcy1	85	0.0369772	0.959447	0.0485145	0.798843	-0.239225	0.0303602	-0.155523	0.0564005
ENSMUSG00000020431	Adcy1	86	0.233551	0.663657	0.245259	0.384877	-0.0247649	0.490876	0.0328157	0.432045
ENSMUSG00000020431	Adcy1	87	0.102396	0.825981	0.117775	0.20518	-0.091158	0.0551206	-0.0986219	0.122178
ENSMUSG00000020431	Adcy1	88	0.302115	0.516386	0.316725	0.194673	0.108201	0.0144103	0.00784758	0.711242
ENSMUSG00000020431	Adcy1	89	-0.100654	0.894071	-0.0900746	0.812323	-0.00233642	0.94384	-0.0418525	0.368167
ENSMUSG00000020431	Adcy1	90	0.380396	0.560873	0.385916	0.520562	-0.124147	0.032762	-0.151558	0.0294109
ENSMUSG00000020431	Adcy1	91	-0.124198	0.862953	-0.107473	0.659043	-0.0628425	0.0770654	0.0112895	0.826839
ENSMUSG00000020431	Adcy1	92	0.27169	0.628762	0.288694	0.0636993	0.0195266	0.435323	0.0685577	0.155052
ENSMUSG00000020431	Adcy1	93	0.788703	0.0361631	0.800304	0.109754	0.140919	0.0584106	0.148252	0.0402136
ENSMUSG00000020431	Adcy1	94	-0.0124061	0.993126	-0.00506495	0.991252	0.0426259	0.413265	0.0947113	0.0220828
ENSMUSG00000020431	Adcy1	95	-0.118143	0.869698	-0.107494	0.722289	0.172947	0.0620234	0.0692814	0.156957
ENSMUSG00000020431	Adcy1	96	-0.851064	0.105281	-0.835347	0.0158965	-0.130001	0.128001	-0.148007	0.119272
ENSMUSG00000020431	Adcy1	97	0.168381	0.757148	0.185268	0.243775	0.0937884	0.273855	0.0894735	0.129399
ENSMUSG00000020431	Adcy1	98	0.302084	0.600658	0.318399	0.0815092	0.0720115	0.137505	0.180427	0.0358891
ENSMUSG00000020431	Adcy1	99	0.609704	0.463164	0.633995	0.423704	0.38488	0.0175042	0.200461	0.0255114
ENSMUSG00000020431	Adcy1	100	0.305005	0.630097	0.321012	0.380028	0.108556	0.0115748	0.0852245	0.0930679
ENSMUSG00000020431	Adcy1	101	-0.29884	0.809986	-0.283064	0.68218	0.153809	0.0018535	0.116087	0.0762787
ENSMUSG00000020431	Adcy1	102	-0.700962	0.153496	-0.695112	0.10269	0.151435	0.20875	0.0482675	0.292814
ENSMUSG00000020431	Adcy1	103	-0.292279	0.688751	-0.290785	0.438984	0.170654	0.189423	0.165819	0.0596294
ENSMUSG00000020431	Adcy1	104	0.212954	0.848696	0.215232	0.605747	0.135973	0.113148	0.0610278	0.261081
ENSMUSG00000020431	Adcy1	105	0.136142	0.845236	0.152603	0.297739	0.0853211	0.271515	-0.0258927	0.580426
ENSMUSG00000020431	Adcy1	106	0.117122	0.90943	0.130075	0.523881	0.209623	0.0159159	0.154785	0.0747175
ENSMUSG00000020431	Adcy1	107	0.33449	0.630083	0.341599	0.365434	0.464634	0.00814565	0.29032	0.0266578
ENSMUSG00000020431	Adcy1	108	0.391658	0.451873	0.409247	0.0763837	0.204507	0.00893705	0.230332	0.00878323
ENSMUSG00000020431	Adcy1	109	0.390525	0.538052	0.401258	0.190976	0.435931	0.00678725	0.260032	0.0413269
ENSMUSG00000020431	Adcy1	110	0.410209	0.369295	0.424587	0.0614424	0.296257	0.00692164	0.260279	0.027599
ENSMUSG00000020431	Adcy1	111	0.652046	0.105281	0.663766	0.0935093	0.216873	0.0421604	0.112396	0.0265048
ENSMUSG00000020431	Adcy1	112	0.308825	0.461729	0.323635	0.0365378	0.13867	0.127422	0.0475858	0.347723
ENSMUSG00000020431	Adcy1	113	0.495458	0.460686	0.500275	0.209487	-0.223927	0.027736	-0.242215	0.0968217
ENSMUSG00000020431	Adcy1	114	-0.343228	0.579765	-0.33353	0.432265	0.0944251	0.0871611	-0.0217591	0.660131
ENSMUSG00000020431	Adcy1	115	0.0541076	0.961565	0.0506105	0.933268	0.225587	0.0689589	0.130418	0.0468555
ENSMUSG00000020431	Adcy1	116	-1.0342	0.646982	-5.55896	0.441765	0.268645	0.065828	0.0197992	0.699992
ENSMUSG00000020431	Adcy1	117	0.067955	0.933365	0.0841123	0.735632	0.08148	0.191762	0.0595453	0.245998
ENSMUSG00000020431	Adcy1	118	0.0476525	0.95458	0.0614943	0.827368	0.0901562	0.1073	0.057189	0.181146
ENSMUSG00000020431	Adcy1	119	0.414718	0.213318	0.428662	0.092524	0.0592054	0.341662	0.0436521	0.3771
[truncated: 3,696 more rows]
