# Supplementary material for: Massively parallel identification of zipcodes in primary cortical neurons
Source: bioRxiv preprint, doi:10.1101/2021.10.21.465275, version 1 (2021-10-21)
Supplement: Table_S5 [file 465275_file05.xlsx]

## Sheet: Table-S6
Table S6. Proteomics data from neurite and soma compartment of primary cortical neurons. A: Unique gene name B: Unique uniprot ID C: Majority gene names D: Majority protein IDs E: neurie/soma log2 ratio of GAPDH normalised iBAQ values calculated using limma F: adjusted p-value (BH method) for neurie/soma log2 G-I: log2 transformed GAPDH normalied iBAQ values for neurite samples 1-3 J-L: log2 tran…
Unique gene_name	Unique uniprot.ID	Majority gene names	Majority.protein.IDs	Neurite-Soma_log2_ratio	Neurite-Soma_adjusted_pvalue	log2_iBAQ_deltaGAPDH_Neurite_1	log2_iBAQ_deltaGAPDH_Neurite_2	log2_iBAQ_deltaGAPDH_Neurite_3	log2_iBAQ_deltaGAPDH_Soma_1	log2_iBAQ_deltaGAPDH_Soma_2	log2_iBAQ_deltaGAPDH_Soma_3	log2_LFQ_Neurite_1	log2_LFQ_Neurite_2	log2_LFQ_Neurite_3	log2_LFQ_Soma_1	log2_LFQ_Soma_2	log2_LFQ_Soma_3
0610010F05Rik	M0QWF3	0610010F05Rik;Kiaa1841	M0QWF3;Q68FF0;Z4YM60	-0.0995	0.855212	-1.69925	-2.18676	-3.11817	-2.30447	-2.19935	-2.20187	28.6892	26.8541	27.1954	26.7304	27.3541	27.2338
0610012G03Rik	A0A0J9YTR2	0610012G03Rik	A0A0J9YTR2	-6.39	0.000124882	-6.22621	-5.24568	-6.30125	0.539625	0.216168	0.641433	23.9116	23.1545	24.5979	27.0403	26.6473	27.2275
1110051M20Rik	Q8BHR8	1110051M20Rik	Q8BHR8	-0.0975	0.84175	-2.72178	-1.8149	-3.00948	-2.45387	-2.31386	-2.48586	26.791	26.2194	26.3231	25.8524	26.3977	25.6447
1500009L16Rik	A0A1W2P6X0	1500009L16Rik	A0A1W2P6X0;P0C913	0.486	0.301478	0.614813	0.861673	0.858204	0.918016	0.232377	-0.272841	26.8252	27.4512	26.882	26.8495	26.1022	26.2442
1700021F05Rik	D3Z316	1700021F05Rik	D3Z316;Q9CQF4	-0.238	0.703582	-1.69703	-1.77442	-1.78147	-1.04256	-2.51719	-0.979349	25.6006	26.6695	26.8158	27.451	26.7461	26.6604
1700023F06Rik	Q497J8	1700023F06Rik	Q497J8;A2AB62	-0.64	0.609147	-6.58588	-3.33162	-3.44754	-3.96901	-3.80729	-3.66811	24.0605	25.62	25.3437	25.0311	25.0673	25.1205
1700025G04Rik	Q8K207	1700025G04Rik	Q8K207;A0A0A0MQF7	-0.867	0.167122	-1.52007	-0.780029	-1.66336	-1.24965	0.00816881	-0.120666	25.6838	27.7153	27.0074	25.9677	26.7421	27.6483
1700037H04Rik	F8WIU1	1700037H04Rik	F8WIU1;Q9D1K7;H7BXB9	-0.766	0.275073	1.43398	1.08498	-0.388112	1.37851	1.3292	1.72067	29.4624	28.8475	28.0937	29.1889	28.7797	29.0007
2010300C02Rik	E9Q3M9	2010300C02Rik	E9Q3M9	0.582	0.62142	-1.96772	-2.04206	-1.86468	-1.231	-4.50996	-1.88046	29.1426	28.5967	28.6089	29.1206	27.5432	28.1742
2210016F16Rik	G3X8U3	2210016F16Rik	G3X8U3	-0.00525	0.994158	-4.37774	-6.16441	-4.50065	-4.45487	-4.85269	-5.7195	24.6595	24.711	24.6208	24.5043	24.2608	24.8135
2210016L21Rik	A0A0R4J099	2210016L21Rik;Custos	A0A0R4J099;Q3UY34	-5.05	0.00349205	-6.70004	-5.39706	-6.0978	-1.62717	0.507148	-1.91008	23.8537	23.7127	22.807	26.7851	28.1463	27.271
2310061I04Rik	B8JJ66	2310061I04Rik	B8JJ66;B8JJ69;F6X1P1;F6W3U3	-3.71	0.0681848	-1.90516	-6.85164	-2.85706	0.297179	-0.201946	-0.584366	26.9683	23.4308	27.0466	28.0135	27.3684	27.1533
2410002F23Rik	Q3TE80	2410002F23Rik	Q3TE80;D3Z520;D3Z276;A0A087WSJ7	-2.35	0.00388261	-0.445013	-0.430108	0.454855	2.64677	2.05384	1.94189	28.2127	27.476	28.8913	30.6956	30.4324	30.2676
2410004B18Rik	F6XV67	2410004B18Rik	F6XV67;D6RCI4;Q9CWU4	-2.91	0.343372	-6.87903	-6.19457	1.41037	-0.721677	-1.09287	-1.12578	23.8629	23.5703	27.7328	25.4971	24.7571	24.7133
2610301B20Rik	Q3UJP5	2610301B20Rik	Q3UJP5;B1AV75	-0.976	0.203954	-1.83319	-2.78295	-0.915045	-0.274608	-1.02756	-1.30105	26.9685	26.486	27.6982	27.2233	26.7335	26.6287
2900026A02Rik	A0A1D5RLN6	2900026A02Rik;Kiaa1671	A0A1D5RLN6;A0A1B0GR85;Q8BRV5	3.66	0.0480556	-0.0714205	-0.52083	-0.0463214	-2.05515	-3.08827	-6.46913	28.66	28.0934	28.3043	27.7049	26.5825	23.9188
4833439L19Rik	D3Z1F7	4833439L19Rik;P33monox	D3Z1F7;Q9DBN4	0.491	0.835121	-3.18759	-2.16398	-4.85246	-1.07887	-3.23981	-7.35946	24.9263	27.3795	24.8443	26.7772	26.264	24.3879
4931406C07Rik	Q91V76	4931406C07Rik	Q91V76;A0A1L1SSF8	-0.266	0.516532	1.01992	0.0035004	0.537155	0.851355	0.810857	0.697596	29.8597	29.1715	29.3717	29.5955	29.2189	28.9087
4932414N04Rik	Q8CEQ9	4932414N04Rik	Q8CEQ9	5.95	0.00139195	3.59029	1.86593	1.7387	-2.601	-4.3339	-3.71757	31.6997	32.7502	32.7762	27.4167	26.2019	26.5909
4932415D10Rik	A0A1W2P6U8	4932415D10Rik	A0A1W2P6U8;E9Q0G0	-1.01	0.326382	-6.47166	-5.1699	-7.34728	-5.61314	-6.17729	-4.17041	24.1699	24.9578	23.97	27.2184	26.3697	28.0699
4933434E20Rik	Q8R092	4933434E20Rik	Q8R092	2.19	0.203681	-0.947668	-2.06694	-1.73682	-6.58538	-2.38998	-2.33648	27.8196	25.4826	26.1412	24.7047	26.0547	26.0755
5031439G07Rik	B1APX2	5031439G07Rik	B1APX2;Q3UE31	-0.647	0.166062	-1.21334	-0.14665	-0.720451	-0.30398	0.0633842	0.100403	28.2618	29.1513	28.6652	28.8364	29.4157	29.1736
5330417C22Rik	V9GWR8	5330417C22Rik;Kiaa1324	V9GWR8;A0A0A0MQC6;A2AFS3	-3.92	0.00688188	-6.36652	-4.54096	-6.90519	-2.63979	-1.94658	-1.45318	23.3209	24.2989	23.9526	27.0433	28.1063	28.3225
5730455P16Rik	J3KMQ6	5730455P16Rik	J3KMQ6;Q9CYI0	-0.196	0.551874	-1.206	-1.55381	-1.14981	-1.07502	-1.4031	-0.844172	27.8566	27.6734	28.4067	27.4986	27.4623	27.7128
6430548M08Rik	Q3TA40	6430548M08Rik;Kiaa0513	Q3TA40;Q8R0A7;Q8BQB5	0.551	0.065852	2.30248	2.60967	2.37108	1.84258	1.98249	1.8045	31.5137	31.3139	31.2848	30.8628	30.8006	30.7388
9330159F19Rik	D3Z623	9330159F19Rik	D3Z623	1.71	0.0569025	-2.78667	-2.38211	-3.27065	-4.2205	-5.64647	-3.68859	27.4468	27.5685	26.6897	25.7797	23.8929	26.207
9330182L06Rik	Q3UZV7	9330182L06Rik	Q3UZV7;E9PUJ3	-4.6	0.0156708	-6.95092	-3.00614	-4.15743	-0.576419	0.200271	0.0708448	24.1005	25.914	25.5547	29.5445	30.6244	30.3593
Aaas	P58742	Aaas	P58742	-3.18	0.0995385	-2.14529	-7.08811	-3.08391	-0.613357	-1.04636	-1.11181	27.8304	23.6348	26.666	28.3982	27.8911	27.9728
Aacs	Q9D2R0	Aacs	Q9D2R0	-0.253	0.354855	0.808947	1.09464	0.925331	1.38793	1.07545	1.12408	30.8612	30.7692	30.5667	30.9716	30.503	30.5068
Aak1	Q3UHJ0	Aak1;Bmp2k	Q3UHJ0	0.684	0.0301366	3.38621	3.39548	3.19092	2.75037	2.58672	2.58295	33.2607	33.1089	33.0769	32.5138	32.5856	32.65
Aamdc	D3Z442	Aamdc	D3Z442;D3YZD8;Q8R0P4;D3YWY5;D3Z1Q3	-1.79	0.429386	-0.0770719	-6.24061	-0.704704	-0.504618	-0.327891	-0.821072	27.2466	24.5388	27.2314	27.1136	28.4729	27.5911
Aamp	Q3TJ22	Aamp	Q3TJ22;J3QN89	-1.75	0.208129	-2.76439	-2.8344	-6.13072	-1.43826	-2.41924	-2.60705	25.988	26.2279	24.3257	25.8843	25.9411	25.7587
Aar2	Q9D2V5	Aar2	Q9D2V5	-0.648	0.318242	-1.96767	-3.46664	-1.93802	-1.53541	-1.83325	-2.05837	26.9168	26.0067	26.5615	27.0999	26.7175	26.471
Aars	Q8BGQ7	Aars	Q8BGQ7	0.39	0.161651	4.53777	4.37226	4.52781	3.89444	4.12801	4.24591	34.8005	34.6989	34.7979	34.2541	34.3974	34.4499
Aars2	Q14CH7	Aars2	Q14CH7	-2.58	0.0956963	-3.7412	-7.10831	-4.46753	-1.63096	-3.77692	-2.17499	27.16	24.2985	26.4843	28.0073	27.0382	27.3935
Aarsd1	Q3THG9	Aarsd1;Gm27029	Q3THG9;A2A4P3;A2A4P4	0.00699	0.98213	1.44494	1.10786	1.64147	1.3894	1.25306	1.53083	30.4616	30.488	30.6478	30.4777	30.1836	30.0971
Aasdhppt	Q9CQF6	Aasdhppt	Q9CQF6	-0.55	0.0831487	-2.18284	-2.24379	-2.40869	-1.92278	-1.48522	-1.77709	26.5316	26.3567	26.3539	25.7123	26.4127	26.3936
Aatk	B1AZF9	Aatk	B1AZF9;B1AZF3;Q80YE4	-0.63	0.149034	-2.24948	-3.09427	-2.89253	-2.4208	-1.88353	-2.04177	27.7684	27.5345	28.0053	27.2823	28.1557	27.7643
Abat	P61922	Abat	P61922	-1.26	0.00533981	3.43386	3.06545	3.25288	4.32909	4.6354	4.56621	32.7394	32.8702	32.882	33.7979	34.011	33.9537
Abca2	A2AJ26	Abca2	A2AJ26;P41234	-3.06	0.0490129	-6.85934	-7.65418	-3.96619	-3.29638	-2.96762	-3.02897	23.6538	23.5483	24.2796	28.1064	27.742	28.032
Abca3	Q8R420	Abca3;Abca17;Abca14	Q8R420;Q6AXE3	-0.19	0.520518	-0.664507	-1.0136	-1.01255	-0.554094	-0.638747	-0.92803	30.0605	29.7247	29.7787	30.2049	29.7405	29.9636
Abca5	Q8K448	Abca5	Q8K448;A2AEP5	-0.61	0.129131	-3.7499	-4.11634	-4.47049	-3.77501	-3.23882	-3.49401	26.7626	26.8058	26.6048	26.8115	27.2718	26.7851
Abcb10	Q9JI39	Abcb10	Q9JI39	-2.34	0.0187634	-7.18043	-6.05879	-7.53827	-4.00642	-5.41752	-4.33583	NA	NA	NA	NA	NA	NA
Abcb4	P21440	Abcb4	P21440;A0A0G2JDM4	-0.557	0.557764	-4.98183	-5.59733	-7.40473	-4.75289	-5.80919	-5.75064	25.923	23.7259	24.3244	25.9187	24.1341	24.7988
Abcb6	Q9DC29	Abcb6;Abcb1a;Abcb1b	Q9DC29	-1.66	0.00928887	-1.5292	-2.53652	-1.65554	-0.231785	-0.321416	-0.197417	28.1476	27.8682	28.2161	29.2656	29.2038	29.0457
Abcb7	Q61102	Abcb7	Q61102	-3.23	0.0282246	-3.26851	-1.8639	-5.2759	-0.174311	-0.288731	-0.259584	26.928	27.5354	25.3252	29.5544	28.9465	29.4961
Abcb8	Q9CXJ4	Abcb8	Q9CXJ4	-1.34	0.00439231	-2.37265	-2.11853	-1.99685	-1.00983	-0.737279	-0.707804	28.0165	28.2475	28.3547	28.8104	28.5238	28.9169
Abcb9	Q9JJ59	Abcb9	Q9JJ59	-0.992	0.116639	-1.70369	-3.1661	-2.0015	-1.10769	-1.58624	-1.20077	28.3113	27.3974	27.7675	28.3935	27.9862	28.0588
Abcc1	O35379	Abcc1	O35379	-0.0986	0.888653	-4.82807	-6.27925	-6.12962	-5.06847	-6.18966	-5.68287	25.9203	23.9015	25.2292	24.8728	24.9762	25.4502
Abcc3	A0A0R4J015	Abcc3	A0A0R4J015;J3QML2;B2RX12	-1.63	0.0195926	-4.27942	-4.85334	-3.71267	-2.20715	-3.05259	-2.70355	26.3708	25.514	26.808	28.2098	27.2751	27.5914
Abcc8	B2RUS7	Abcc8	B2RUS7;A0A1B0GRD7;A0A1B0GT25	0.705	0.744422	-6.18437	-1.91848	-7.86524	-5.907	-5.10171	-7.07343	NA	NA	NA	NA	NA	NA
Abcd1	P48410	Abcd1	P48410	-2.19	0.0315854	-6.16635	-6.34748	-6.03908	-3.08002	-5.31159	-3.59154	23.5166	24.3275	24.0047	26.5094	23.5159	26.2265
Abcd3	P55096	Abcd3	P55096;A0A0G2JDI9	-1.38	0.00338688	-0.504621	-0.437065	-0.168402	0.987673	1.14781	0.896061	29.6725	29.6699	29.8684	30.7729	30.7578	30.7112
Abce1	P61222	Abce1	P61222	-1.08	0.0501953	0.88014	1.99633	1.47909	2.25898	2.75183	2.58498	31.3754	31.2845	31.219	31.8254	31.9229	31.7224
Abcf1	Q6P542	Abcf1;Prrc2b	Q6P542	-4.37	0.00361529	-2.4076	-4.86578	-3.75325	0.476289	1.08765	0.529313	28.073	25.7717	27.2769	29.8211	30.8324	30.3153
Abcf2	Q99LE6	Abcf2	Q99LE6	-1.81	0.0869358	-0.956354	-3.4078	-1.51831	0.484538	-0.490445	-0.434873	28.9605	27.2021	28.7097	29.5227	29.396	29.3259
Abcf3	Q8K268	Abcf3	Q8K268;A0A338P6L5	-1.92	0.0202074	-1.81066	-2.80664	-3.41885	-0.372601	-0.985402	-0.90812	28.7905	27.6779	27.8697	28.2713	28.2243	28.4064
Abcg1	A0A494B9N8	Abcg1	A0A494B9N8;Q64343;A0A494B9K1	-0.859	0.488927	-3.61052	-4.12299	-3.3742	-1.12611	-4.72122	-2.68357	26.293	25.2739	25.7249	25.265	24.955	25.2748
Abcg2	S4R2E1	Abcg2	S4R2E1;A0A0R4J0B6;Q7TMS5;D3YZX5;A0A0N4SWA2;D3Z150	-0.999	0.16891	-2.5062	-4.3395	-2.91929	-2.09327	-2.13806	-2.53637	26.9898	26.1476	26.9381	27.0296	25.933	26.0222
Abcg4	Q91WA9	Abcg4	Q91WA9	0.266	0.53284	-1.44561	-1.59275	-1.91974	-2.33569	-1.38545	-2.03548	26.9198	28.4001	26.5294	26.7456	28.1566	27.1914
Abhd10	Q6PE15	Abhd10	Q6PE15	-0.542	0.590489	-1.41927	-2.7009	0.186073	-1.10113	-0.50376	-0.702871	27.3368	24.0111	28.0763	28.2353	28.6727	28.2654
Abhd11	Q8K4F5	Abhd11	Q8K4F5;D3YYK0	-1.84	0.0940182	-3.50161	-0.928774	-1.28027	-0.582397	0.168032	0.234281	27.3638	27.8077	27.9142	28.2145	28.3674	28.3041
Abhd12	Q99LR1	Abhd12	Q99LR1;D6RFU2	-2.08	0.00958928	0.848429	1.63354	0.476881	2.58542	3.50275	3.1033	30.0633	30.933	30.2588	31.5684	31.8159	31.6645
Abhd16a	Q9Z1Q2	Abhd16a;Abhd16b	Q9Z1Q2	-1.2	0.00597078	-0.816751	-0.464132	-0.505614	0.702287	0.463987	0.63985	29.401	29.1285	29.3167	29.9094	29.5807	29.5527
Abhd17a	Q99JW1	Abhd17a	Q99JW1;A0A087WST3	0.0688	0.898465	-1.9534	-1.36883	-0.640013	-1.06647	-1.56324	-1.5389	27.3903	27.2751	27.796	27.1218	26.7636	26.6302
Abhd17b	Q7M759	Abhd17b	Q7M759;A0A494BBA3	0.631	0.307248	-1.50033	-0.0344456	-0.682844	-1.87837	-1.19847	-1.03356	27.8278	28.4183	27.8078	26.9485	27.3171	27.0859
Abhd17c	Q8VCV1	Abhd17c	Q8VCV1	0.415	0.166168	-0.361013	-0.241143	-0.416843	-0.983508	-0.499719	-0.780487	28.7545	27.8997	28.7249	27.5165	27.6155	27.2791
Abhd5	Q9DBL9	Abhd5	Q9DBL9	-0.24	0.65586	-2.06653	-3.31024	-2.70521	-2.03119	-2.60558	-2.7262	27.0517	25.4345	26.2833	26.3462	25.8727	25.5524
Abhd6	Q8R2Y0	Abhd6	Q8R2Y0	-0.887	0.0335592	1.90044	1.28249	1.28086	2.45653	2.39827	2.26982	30.7012	30.1961	30.6957	30.9176	30.9398	30.9495
Abi1	B7ZCU2	Abi1	B7ZCU2;B7ZCU5;B7ZCU4;B7ZCU3;B7ZCU0;J3QNK8;Q8CBW3	0.817	0.0278861	3.80835	3.3592	3.37519	2.58729	2.75586	2.74966	32.5317	32.3013	32.3175	31.5374	31.7151	31.5312
Abi2	A0A087WPP8	Abi2	A0A087WPP8;Q6AXH6;P62484;Q6AXD2	1.3	0.0491329	-0.496268	-1.24964	0.254224	-1.95588	-1.64719	-1.79544	28.0946	28.6355	28.6256	26.5631	27.0096	26.7294
Abi3bp	A0A338P6W9	Abi3bp	A0A338P6W9;E9Q8E3;Q59IW9;Q59IW7;Q59IW5;Q59IW6;A0A338P6S8	-2.64	0.0142997	-5.07666	-4.07602	-5.26381	-3.2045	-1.45895	-1.82877	25.6263	26.2958	25.4152	26.7189	28.6677	27.4761
Abl1	P00520	Abl1	P00520	1.19	0.0864315	-4.06585	-5.72658	-4.93026	-5.84019	-6.38967	-6.06323	26.2938	25.0585	25.7276	24.4753	24.707	23.9416
Abl2	F8VQH0	Abl2	F8VQH0;Q4JIM5;B2RQ57	1.03	0.0209874	-0.237243	0.000424744	-0.369603	-0.880628	-1.28689	-1.51684	30.1933	30.2196	30.0696	29.2233	28.781	28.4816
Ablim1	E9Q9C4	Ablim1	E9Q9C4;E9Q9C0;E9Q9C1;E9Q9C2;E9QK41;Q8K4G5;E9Q9C7;E9Q030;E9Q9D1;E9Q9D2;E9Q9Q7	1.08	0.0118943	2.10417	1.72604	1.86036	0.56634	0.901839	0.985009	32.3359	31.7725	32.0266	31.0886	30.961	30.9472
Ablim2	E9Q0W6	Ablim2	E9Q0W6	-3.04	0.0121851	-4.11498	-5.72584	-6.5358	-2.57344	-2.32908	-2.36348	25.8723	23.7832	23.9785	27.1805	27.3356	27.2685
Ablim2.1	E9Q4K0	Ablim2	E9Q4K0;Q8BL65	0.389	0.682633	-4.19602	-5.83868	-6.28925	-6.4494	-6.16231	-4.87882	25.8692	23.7681	24.7902	24.1068	23.5804	24.8311
Ablim3	Q69ZX8	Ablim3	Q69ZX8	-1.69	0.0244069	-6.77975	-5.23712	-5.73823	-4.07384	-4.23026	-4.39379	24.598	25.5535	23.7557	25.5133	25.153	25.6974
Abr	Q5SSL4	Abr	Q5SSL4;E9PUE7	0.605	0.0969267	2.29772	2.92359	2.40766	1.78458	1.98893	2.0407	32.4932	32.7519	32.474	31.795	31.9458	32.135
Abracl	A0A1W2P7X0	Abracl	A0A1W2P7X0;E9QMV2;Q4KML4	0.107	0.695472	3.02125	3.34693	3.35077	3.20197	3.17726	3.02002	29.5939	29.5253	29.4741	29.2045	29.0892	29.0298
Abraxas2	Z4YJY0	Abraxas2	Z4YJY0;Q3TCJ1;D3Z4D8	-0.04	0.947314	0.967357	1.17834	1.57314	2.02616	1.3421	0.470597	30.0024	29.7261	30.1428	29.1443	29.7053	29.2472
Acaa1a	Q921H8	Acaa1a;Acaa1b	Q921H8;H3BKL5;H3BJZ9;Q8VCH0	-0.652	0.0348623	2.40352	2.6554	2.52104	3.14896	3.12126	3.26447	31.6378	31.7797	31.5166	32.0855	32.1468	32.2559
Acaa2	Q8BWT1	Acaa2	Q8BWT1	-1.23	0.0173082	1.46712	0.747199	1.22689	2.09865	2.37354	2.65157	30.8912	30.0774	30.5125	31.2026	31.2396	31.2929
Acaca	Q5SWU9	Acaca;Acacb	Q5SWU9	-0.421	0.132212	0.856321	0.606972	0.537756	1.19014	1.01237	1.06223	32.5126	32.2916	32.3497	32.6208	32.3968	32.2175
Acacb	E9Q4Z2	Acacb	E9Q4Z2	-1.07	0.0342024	-7.4799	-6.66747	-6.67247	-5.64522	-5.93152	-6.03058	23.938	25.093	23.7073	25.6289	25.4411	25.3752
Acad8	A0A0R4J0P1	Acad8	A0A0R4J0P1;Q9D7B6;D3YTT4	-2.21	0.0115898	-2.22081	-1.10545	-2.58237	-0.188636	0.425958	0.474381	27.3588	28.2721	26.8454	29.0064	29.2841	29.733
Acad9	Q8JZN5	Acad9	Q8JZN5	-1.04	0.0192418	1.72971	1.06847	1.61982	2.58472	2.40987	2.55292	31.674	31.5155	31.4963	32.2924	31.9293	32.0072
Acadl	A0A0R4J083	Acadl	A0A0R4J083;P51174	-4.23	0.000253365	-2.68749	-2.62157	-2.64672	1.00015	1.95807	1.76483	27.5501	27.9442	27.0598	30.0508	30.4989	30.4303
Acadm	P45952	Acadm	P45952	-4.56	0.0405512	-2.01578	-2.99331	-7.15839	0.701878	0.150414	0.665727	26.5026	25.5601	24.1168	29.7717	29.404	28.7914
Acads	Q07417	Acads	Q07417	-5.11	0.000996633	-6.31842	-7.89771	-7.23831	-1.36594	-2.73164	-2.02002	23.9777	23.8482	23.3854	27.2831	26.6486	26.7362
Acadsb	Q9DBL1	Acadsb	Q9DBL1;E9Q5L3	-1.16	0.0227321	2.20064	2.06621	2.4289	3.6727	2.88437	3.62027	31.5101	31.4252	31.8558	32.0333	31.8557	31.8906
Acadvl	P50544	Acadvl	P50544;B1AR28	-1.95	0.00204295	-0.714239	-1.37943	-0.875948	1.06595	0.81254	0.993837	29.7229	29.0641	29.7895	30.8614	30.4252	30.586
Acan	Q61282	Acan	Q61282	-4.08	0.000386442	-5.73948	-6.43575	-5.40209	-1.95357	-1.87525	-1.49776	23.6316	23.7434	26.4315	28.0951	28.3679	28.7498
Acap2	A0A338P6P6	Acap2	A0A338P6P6;D4AFX6;Q6ZQK5	0.108	0.732255	-0.86251	-1.06001	-0.443639	-0.878949	-0.949817	-0.860747	29.5311	28.9528	29.4548	29.0772	28.8901	28.9441
Acap3	Q6NXL5	Acap3	Q6NXL5;A2ADA6	-0.194	0.757437	-2.32024	-2.08654	-2.02596	-2.88618	-1.76994	-1.19511	28.0839	27.6256	28.0522	27.4193	27.6701	28.6591
Acat1	Q8QZT1	Acat1	Q8QZT1	-1.2	0.006297	5.19518	4.75173	4.87083	6.09829	6.21428	6.09406	34.5566	33.8829	34.188	35.0858	34.9468	35.0518
Acat2	Q8CAY6	Acat2	Q8CAY6;G3XA25;A0A3B2WAL8	0.275	0.318263	4.62618	4.58901	4.32328	4.41264	4.1287	4.17311	33.1124	32.8981	32.8849	32.7596	32.5902	32.634
Acbd3	A0A0R4J079	Acbd3	A0A0R4J079;Q8BMP6	-3.98	0.000390297	-1.38382	-1.6229	-2.40324	2.0825	2.38451	2.06101	26.9095	26.8867	26.6653	30.6395	31.5833	30.7033
Acbd5	A0A2I3BRB9	Acbd5	A0A2I3BRB9;Z4YM84;A0A2I3BQH8;A0A2I3BQ50;E9QNH7;Q5XG73	-3.67	0.123351	-0.847857	-7.01635	-4.83596	-1.87155	-0.0252659	0.195694	28.0215	24.0099	28.05	28.9494	28.7135	28.6237
Acbd6	Q9D061	Acbd6	Q9D061	-0.267	0.446601	1.15239	0.417014	1.01452	1.20988	1.04169	1.13284	29.7387	29.2557	29.5957	29.3761	29.2019	29.0603
Ache	P21836	Ache	P21836;A0A0G2JDM6	-2.68	0.00766762	-6.27592	-6.90682	-7.34628	-4.99535	-3.48686	-3.99844	23.5037	24.3874	24.5156	25.0471	25.0722	25.2033
Acin1	F6RJ39	Acin1	F6RJ39;Q9JIX8;B8JJ91;Q52KR6;B8JJ92	-5.79	0.00554994	-6.33073	-3.94881	-7.65282	-0.725907	0.242714	-0.0767654	23.798	28.2145	23.5632	29.4391	30.9192	30.1565
Acly	Q3V117	Acly	Q3V117;Q91V92	0.496	0.077524	5.29165	5.55092	5.38772	4.85357	4.91021	4.97864	35.8694	36.0175	35.9102	35.3575	35.4083	35.4089
Aco1	P28271	Aco1	P28271	0.473	0.113201	2.44506	2.84979	2.65263	2.05549	2.27056	2.2016	32.6614	32.6867	32.6328	32.1489	32.1079	32.0874
Aco2	A0A2R8VJW0	Aco2	A0A2R8VJW0	-4.19	0.25522	-0.824681	-5.95173	-7.37432	-5.43683	1.92962	1.93044	27.492	23.5502	23.9818	24.943	27.4505	27.6618
Aco2.1	Q99KI0	Aco2	Q99KI0	-0.92	0.0130351	5.28102	4.96974	5.10569	5.90998	6.0758	6.13045	35.2045	34.9268	35.197	35.7891	35.8041	35.6721
Acot13	Q9CQR4	Acot13	Q9CQR4	-2.71	0.0137004	0.916789	-0.759478	-1.22397	2.20399	2.5147	2.35303	28.2448	28.1372	27.8085	29.4607	29.6641	29.4187
Acot7	E9PYH2	Acot7	E9PYH2;Q91V12	0.852	0.0128679	5.8396	6.07027	5.96307	5.12724	5.1093	5.07917	34.9516	34.9611	34.9477	34.0863	34.1043	34.1438
Acot8	Q8BZR4	Acot8	Q8BZR4;P58137	-1.06	0.637661	-1.54563	-2.76097	-7.66535	-3.33233	-1.99166	-3.47687	26.6346	25.8856	24.0248	23.7192	25.3823	26.1134
Acot9	Q9R0X4	Acot9;Acot10	Q9R0X4;Q32MW3	-0.985	0.00819189	1.84202	1.81435	1.71295	2.83064	2.63665	2.85838	31.5165	31.15	31.3806	32.4159	32.0565	31.9618
Acox1	A2A848	Acox1	A2A848	-3.46	0.0254311	-7.76975	-6.40893	-4.53347	-1.95765	-3.39358	-2.97695	23.4345	24.6141	26.1119	27.1312	26.7141	26.6663
Acox1.1	Q9R0H0	Acox1	Q9R0H0	-4.25	0.0141851	-3.09666	-6.61206	-3.8952	-0.389601	-0.356965	-0.0997218	27.2623	23.8143	26.5379	29.311	29.2551	29.2255
Acox3	Q3TAW3	Acox3	Q3TAW3;E9Q296;Q8C178;Q9EPL9	0.738	0.696248	-4.33792	-4.29964	-3.06745	-2.45394	-3.78153	-7.68394	26.2218	26.3184	26.3998	26.7142	26.7939	23.7554
Acp1	Q9D358	Acp1	Q9D358;A0A1W2P7X3;Q561M1	0.494	0.137253	2.98762	2.56927	2.47048	1.99498	2.31665	2.23301	30.5027	30.0289	30.2071	29.741	30.0846	29.822
Acp2	P24638	Acp2	P24638;B7ZCF5	-2.21	0.000779917	-1.43106	-1.66507	-1.20513	0.871345	0.872083	0.595017	27.5627	27.2298	27.843	29.5575	29.4277	29.326
Acp6	Q8BP40	Acp6	Q8BP40	-3.93	0.0249373	-3.67369	-6.76112	-7.27494	-2.53694	-1.43506	-1.94674	26.3473	23.4721	23.8383	26.9099	26.6729	26.9615
Acsf2	Q8VCW8	Acsf2	Q8VCW8	-2.82	0.00168203	-6.04113	-7.08878	-6.5886	-4.08124	-3.68557	-3.48312	23.5259	23.7011	23.7269	25.7191	25.2989	25.3785
Acsf3	Q3URE1	Acsf3	Q3URE1;A0A1D5RMC8	-1.74	0.000908355	-2.03427	-1.91617	-1.83171	-0.253832	-0.166132	-0.13801	28.4728	28.1535	28.5316	29.4987	29.0789	29.2849
Acsl1	P41216	Acsl1	P41216;D3Z041	-0.826	0.0322962	1.56536	1.174	0.974331	1.97316	2.07973	2.13785	31.659	30.9412	31.0992	31.7886	31.5034	31.6066
Acsl3	Q9CZW4	Acsl3	Q9CZW4;E9PUC2	-0.684	0.0493507	1.54159	2.06951	1.79907	2.43223	2.45178	2.57766	31.6074	31.4725	31.6717	31.8404	31.9597	31.9108
Acsl4	Q9QUJ7	Acsl4	Q9QUJ7	-0.716	0.0290107	3.42034	3.657	3.30969	4.15003	4.17051	4.21369	33.3228	33.4582	33.2391	33.7975	33.8784	34.0389
Acsl5	Q8JZR0	Acsl5	Q8JZR0	0.0775	0.940684	-2.37389	-4.41011	-2.58542	-2.13489	-3.29588	-4.17117	27.3624	26.1931	27.2332	27.057	26.1267	26.3596
Acsl6	Q91WC3	Acsl6	Q91WC3;Q5ICG5;Q8R1X1;Q5F2C5;Q8BYJ0;E9Q7Y2	-0.878	0.0145689	1.16293	0.987895	0.897354	2.02288	1.78387	1.87435	31.1828	31.1915	31.4031	31.5973	31.4876	31.6341
Acsm5	Q6P8J0	Acsm5	Q6P8J0;A0A140LHR8;Q8BGA8	-0.945	0.441807	1.73453	-1.34894	1.83171	1.85601	1.41542	1.78081	30.1947	27.1631	30.2392	30.2597	29.7287	30.0994
Acss1	Q99NB1	Acss1	Q99NB1	-2.27	0.00921889	-6.70795	-6.89736	-6.46578	-4.19778	-5.29858	-3.75746	24.033	24.3233	24.0736	25.3086	25.0822	25.4028
Acss2	A2AQN4	Acss2	A2AQN4;Q9QXG4;A2AQN5	-1.42	0.00468362	-0.694361	-0.621476	-0.522935	1.12787	0.555671	0.731417	29.5795	29.2445	29.8018	30.2766	29.5944	29.6791
Actb.1	E9Q5F4	Actb;Actg1;Actc1;Gm17087	E9Q5F4;G3UZ07;E9Q606	-4.11	0.148421	-0.396287	-7.83294	-6.77086	-0.280051	-1.16076	-1.2358	28.5939	23.6486	23.1967	27.3865	27.7208	27.1761
Actbl2	Q8BFZ3	Actbl2	Q8BFZ3	-0.465	0.508328	-2.23362	-2.7217	-1.09324	-2.16537	-1.40009	-1.08774	27.2279	26.8246	27.23	27.0629	27.6601	27.7377
Actg1	P63260	Actg1	P63260	-0.802	0.0513373	-2.6826	-2.17607	-2.14074	-1.81749	-1.33072	-1.4453	26.4567	26.6803	26.8689	27.0885	27.486	27.3387
Actg2	P63268	Actg2;Acta2	P63268;P62737;A0A494B9T3;D3YZY0;D3Z2K3	0.193	0.916556	-5.10783	-3.03933	-6.43025	-7.43752	-3.93257	-3.78692	23.6862	25.666	24.2989	23.9987	24.8509	25.256
Actl6a	Q9Z2N8	Actl6a	Q9Z2N8;A0A0A6YWG8	-4.96	0.00873213	-5.87679	-7.44135	-6.48163	-1.69076	0.107805	-3.32666	NA	NA	NA	NA	NA	NA
Actl6b	Q99MR0	Actl6b	Q99MR0;F8WI57	-7.18	0.00099216	-6.01283	-3.77141	-6.51155	2.17864	1.50887	1.54782	23.7973	26.4741	24.6865	30.9696	30.7726	29.8677
Actn1	A1BN54	Actn1	A1BN54	0.00549	0.988217	-2.03943	-2.19819	-1.50443	-2.23878	-1.74171	-1.77804	28.4478	27.7884	28.8445	27.8937	28.6298	28.5576
Actn1.1	Q7TPR4	Actn1	Q7TPR4	1.39	0.234909	-4.50714	-2.90766	-3.08696	-4.49505	-3.67229	-6.51791	25.8592	27.4045	26.6644	26.7131	26.5885	23.6898
Actn2	Q9JI91	Actn2	Q9JI91	-1.33	0.00547198	-0.800511	-0.538615	-0.659604	0.397579	0.690179	0.91219	30.314	30.6141	30.3929	30.4104	30.5988	30.6332
Actn4	A0A1L1SV25	Actn4	A0A1L1SV25;P57780	-0.452	0.376499	-1.2271	-0.341253	-1.58573	-0.799239	-0.677313	-0.322766	29.2345	29.7292	29.1539	29.4354	29.8003	29.716
Actn4.1	A0A1L1SVJ6	Actn4	A0A1L1SVJ6	-0.339	0.644866	-2.28141	-3.23237	-1.15061	-1.92824	-1.91788	-1.79991	26.7928	26.3685	27.8703	26.9041	27.0888	26.9606
Actn4.2	E9Q2W9	Actn4	E9Q2W9	0.105	0.815177	-0.514974	0.416179	0.0582571	-0.447757	-0.0957014	0.187747	29.3125	29.8372	29.5802	29.0387	29.2904	29.5891
Actr10	Q9QZB7	Actr10	Q9QZB7	0.106	0.691412	3.34867	3.09341	3.24488	3.23429	2.9484	3.18587	32.5128	32.0609	32.6233	32.5281	32.178	32.2206
Actr1a	P61164	Actr1a	P61164;A0A494BB86	-0.0717	0.884739	2.69234	3.72049	3.24894	2.86389	3.43129	3.58158	31.7957	32.6658	32.2311	31.6465	32.2462	32.3608
Actr1b	Q8R5C5	Actr1b	Q8R5C5	-0.338	0.410923	2.51554	3.46546	2.89448	3.16247	3.21427	3.51318	31.2898	32.2896	31.8966	31.6146	31.7275	31.9194
Actr2	P61161	Actr2	P61161	0.644	0.0456294	5.62569	6.02744	5.72376	5.11757	5.1528	5.17565	33.9939	34.2632	34.3161	33.4287	33.219	33.1967
Actr3	Q99JY9	Actr3	Q99JY9	0.662	0.0329815	5.72018	5.90437	5.81422	5.08816	5.08201	5.28145	34.5406	35.0219	34.9441	33.931	34.0969	34.162
Actr3b	Q641P0	Actr3b	Q641P0	-0.164	0.59957	2.49586	3.0481	2.92112	2.8436	3.01616	3.09706	31.749	31.8633	31.9099	31.686	31.7577	31.8067
Actr5	V9GXE4	Actr5	V9GXE4;A0A0A0MQ89;Q80US4	0.597	0.510799	-4.30813	-6.20614	-4.23726	-4.68615	-5.90159	-5.95423	24.7663	23.8543	24.737	24.0728	24.2551	23.2712
Acvr1	P37172	Acvr1	P37172	1.49	0.00359688	-1.19747	-1.06312	-0.971965	-2.35897	-2.48748	-2.8685	27.4718	27.1326	27.2634	27.2404	27.1451	26.7012
Acvr1b	Q61271	Acvr1b;Acvr1c;Tgfbr1	Q61271	0.426	0.427762	-1.40214	-1.51748	-2.0276	-2.43261	-2.47108	-1.32142	27.3039	27.2674	26.8486	26.7588	27.4004	27.836
Acvr2a	P27038	Acvr2a	P27038	-1.32	0.0255319	-2.81964	-3.31504	-3.57874	-2.45045	-1.65764	-1.64572	26.8164	26.5063	26.6834	26.9597	27.4443	26.6213
Acyp1	P56376	Acyp1	P56376;E9QJT5	0.13	0.682633	3.37214	2.73468	3.11958	3.00594	2.94383	2.88654	31.0635	30.0852	30.9083	30.7143	30.4563	30.4105
Acyp2	P56375	Acyp2	P56375	-0.94	0.476502	1.04769	-2.5975	0.258783	0.861896	0.0285882	0.637885	27.8454	26.8023	28.4775	28.5134	27.6545	27.9472
Ada	P03958	Ada	P03958	0.967	0.0448188	-0.395324	-0.48427	0.287949	-1.27355	-0.863538	-1.35634	28.8943	28.5892	28.8776	28.3019	28.2372	28.022
Adad1	F6TQG5	Adad1	F6TQG5;F8WI80;Q5SUE7	4.02	0.0136077	-0.740088	-2.11338	-1.65584	-5.89258	-3.80072	-6.89071	27.9573	25.6081	25.9135	23.7883	24.7446	24.937
Adal	Q80SY6	Adal	Q80SY6	1.34	0.485908	-3.40457	-7.42242	-2.9376	-6.78156	-6.78166	-4.21144	24.7361	23.9361	26.2012	24.3038	23.6382	24.8904
Adam10	O35598	Adam10	O35598	-0.237	0.754395	-2.27563	-2.86367	-1.93507	-1.56096	-3.24581	-1.55607	28.0415	27.2097	28.0645	28.2255	27.1358	27.8503
Adam11	Q7TQG7	Adam11	Q7TQG7;Q9R1V4	0.66	0.157463	-0.679044	-0.353006	0.00261294	-0.733647	-1.53747	-0.737992	29.53	29.4781	29.4196	28.613	28.2227	28.5421
Adam15	O88839	Adam15	O88839	0.196	0.835567	-4.86003	-3.91677	-3.92479	-3.74845	-5.85191	-3.68787	26.435	26.0137	26.1589	25.5905	24.1882	25.4859
Adam22	D3YUP9	Adam22	D3YUP9;Q9R1V6	0.944	0.0137596	1.38074	1.58092	1.76724	0.68069	0.499284	0.71721	31.6253	31.7652	31.8435	30.8154	30.6162	30.6737
Adam23	Q9R1V7	Adam23	Q9R1V7	0.601	0.1226	1.3189	1.53383	1.49652	0.860911	0.437135	1.24903	31.344	31.3248	31.0571	30.9003	30.4032	30.6053
Adam9	A0A140LHU0	Adam9	A0A140LHU0;Q61072;E9Q638	1.28	0.0551038	-3.08481	-3.99886	-4.0037	-4.71719	-4.56898	-5.65301	27.1999	26.3739	26.0197	25.8147	25.4252	25.6014
Adamts1	E9PY08	Adamts1	E9PY08;P97857	1.08	0.0633058	-5.40459	-4.82448	-4.70152	-5.45101	-6.57443	-6.15556	24.528	24.6828	25.1015	24.2982	24.3521	23.9168
Adamts3	G3X9D2	Adamts3	G3X9D2;E9Q287	-0.614	0.256635	-3.75688	-2.5405	-3.41533	-2.93918	-2.22006	-2.71214	27.4757	27.7507	27.4797	27.5854	27.5772	27.7425
Adamts6	A0A286YCD8	Adamts6	A0A286YCD8;A0A286YEC9;D3Z1A5	-3.28	0.00411099	-7.13953	-5.73217	-6.13124	-3.78828	-2.80736	-2.57733	23.8352	24.1966	24.2764	24.7958	25.6874	25.8847
Adap1	E9PY16	Adap1;Adap2	E9PY16	0.347	0.251054	3.34766	3.85765	3.59192	3.10665	3.34646	3.30356	32.6256	32.708	32.8418	32.1005	32.0887	32.0089
Adar	Q99MU3	Adar	Q99MU3	-6.79	0.000116398	-6.38979	-6.387	-7.51445	-0.0555239	0.121171	0.0231859	24.0877	24.467	24.1693	30.7908	30.5579	30.4623
Adarb1	Q91ZS8	Adarb1	Q91ZS8	-4.4	0.000386522	-7.07112	-6.19398	-6.24657	-2.05851	-1.71127	-2.53341	23.8533	24.3322	23.952	27.7362	27.3465	27.233
Adck1	Q9D0L4	Adck1	Q9D0L4	-0.468	0.26222	-0.218498	-1.1835	-0.480303	-0.0585903	-0.316223	-0.103303	29.1438	28.9075	28.9994	28.9202	28.8921	28.7209
Adcy1	O88444	Adcy1	O88444	0.934	0.0137596	0.0928417	0.0103177	0.248828	-0.930783	-0.911359	-0.607969	30.2657	30.1877	30.3702	29.0692	28.8453	29.1643
Adcy2	Q3V1Q3	Adcy2	Q3V1Q3;Q80TL1	-1.41	0.00198556	-3.31196	-3.1612	-3.13045	-1.82034	-1.72097	-1.82667	27.1213	27.3457	27.4159	28.3046	28.0453	28.3649
Adcy3	B8JK56	Adcy3	B8JK56;Q8VHH7	0.25	0.401371	-1.55206	-1.89724	-1.74472	-2.07912	-2.1413	-1.72247	28.7662	28.4534	28.8599	28.0792	27.375	27.9047
Adcy5	P84309	Adcy5	P84309	-0.551	0.222796	-2.62466	-2.31148	-3.27343	-2.52213	-2.0178	-2.01791	28.0145	27.846	27.2606	27.8616	27.6923	27.7742
Adcy6	A0A2I3BRC5	Adcy6	A0A2I3BRC5;Q01341;F8VQ52;A0A2I3BRS6	-0.706	0.0657208	-3.74741	-4.20631	-3.84221	-3.12028	-3.01995	-3.53744	26.6132	26.7903	26.7402	25.8625	26.1561	26.3871
Adcy8	A0A2I3BQ46	Adcy8	A0A2I3BQ46;P97490	1.01	0.0396088	-1.63784	-1.41353	-1.19134	-1.9842	-2.41231	-2.88117	28.8222	28.6556	29.1753	28.2298	28.1489	27.9917
Adcy9	P51830	Adcy9	P51830;E9Q706	1.58	0.0120721	-0.641259	-0.756425	-0.272992	-2.30381	-2.53586	-1.56007	29.9691	29.997	30.2887	28.4237	28.1831	29.047
Adcyap1	O70176	Adcyap1	O70176	0.843	0.70197	-1.60152	-1.85596	-1.77762	-6.36272	-0.443987	-0.957102	26.7953	26.23	26.3844	22.6873	26.0733	26.2929
Adcyap1r1	E9Q968	Adcyap1r1	E9Q968;E9PVE8;P70205;E9Q3E8;Q6NXJ9;E9Q4B3	-4.64	0.001628	-7.26919	-5.50204	-7.41857	-2.20178	-2.20158	-1.86467	23.7785	23.362	24.0945	26.6203	26.4221	26.7398
Add1.1	F8WGR0	Add1	F8WGR0;F8WHZ9	-0.176	0.689821	-1.09938	-0.336552	-0.606453	-0.269777	-0.973355	-0.272631	28.9639	29.3402	28.6761	28.6421	28.6334	28.617
Add2	Q9QYB8	Add2	Q9QYB8	-0.243	0.472334	3.69359	3.71577	3.60663	3.54535	3.91302	4.28782	33.4438	33.5794	33.6074	33.1573	33.4178	33.5746
Add3	Q9QYB5	Add3	Q9QYB5;A0A494B9K4	0.56	0.0986781	2.25757	2.74976	2.56729	1.95128	1.78445	2.15934	31.8454	32.0349	32.1291	31.3747	31.2479	31.289
Adgrb1	Q3UHD1	Adgrb1	Q3UHD1;E9Q4H5;A0A087WQV8	-0.546	0.255763	-2.54518	-3.62796	-2.81292	-2.45874	-2.71518	-2.17361	28.3143	27.6891	28.6009	27.9625	27.7473	27.7705
Adgrb3	Q80ZF8	Adgrb3	Q80ZF8;Q68FL1;Q8BJ13	-1.1	0.0115979	-1.93455	-1.44887	-1.56486	-0.724573	-0.393587	-0.519076	29.5861	29.5282	29.5923	29.82	29.6826	29.6347
Adgrg1	Q8K209	Adgrg1	Q8K209;A0A1D5RM68;A0A1D5RLF7;A0A1D5RLB9;A0A1D5RLK9;A0A1D5RLN4;A0A1D5RLE2	-0.682	0.116739	-3.58758	-4.41226	-3.53425	-3.23219	-3.19042	-3.0641	26.3166	25.209	26.2403	26.4387	25.3424	25.3189
Adgrg5	A0A0G2JDA9	Adgrg5;Hoxc10	A0A0G2JDA9;D6RJJ2;P31257;Q3V3Z3	-2.88	0.285517	-0.299722	0.0449588	-6.91857	-0.486315	0.946407	0.999831	26.4243	26.486	24.026	26.0044	27.5084	27.5239
Adgrl1	E9Q3V9	Adgrl1	E9Q3V9;H7BX15;E9Q9Q9;Q80TR1	0.427	0.118829	1.48136	1.35847	1.5884	1.16626	0.935178	1.04536	32.2809	32.0815	32.4432	31.8729	31.6467	31.6568
Adgrl2	A0A0G2JFV3	Adgrl2	A0A0G2JFV3;A0A0G2JDE3;A0A0G2JG66;A0A0G2JDF4;A0A0G2JFF5;A0A0G2JDK6;A0A0G2JGM8;Q8JZZ7;A0A0G2JH16;A0A0G2JEQ8	-0.523	0.653604	-2.30712	-5.34608	-4.01495	-4.23721	-3.06212	-2.79914	28.0587	26.1963	26.8875	26.2645	27.3037	27.4633
Adgrl3	D3YTW7	Adgrl3;Adgrl2	D3YTW7;D3YVT9;D3Z4S7;D3Z5M6;Q80TS3;K3W4M8;D3Z634;D3Z593;D3Z3G4;D3Z6H9;D3Z3X6;D3Z6H7;D3YU23;D3Z6J2;D3YWR3;D3Z4V0;D3YWB1	0.203	0.46396	0.788638	1.01308	1.15098	0.937421	0.762298	0.64326	31.6349	31.4264	31.7762	31.4623	31.214	31.3726
Adgrv1	B8JJE0	Adgrv1	B8JJE0;F6X844;Q8VHN7	1.76	0.324191	-8.27954	-3.41923	-7.68287	-8.06764	-8.46164	-8.12851	26.7028	26.9463	27.1699	26.6815	26.1982	26.4986
Adh5	P28474	Adh5;Adh7	P28474	0.433	0.109459	4.22998	4.37415	4.11472	3.87747	3.75457	3.78745	33.1605	33.2083	33.0337	32.6225	32.6063	32.5743
Adipor1	Q91VH1	Adipor1	Q91VH1	0.26	0.393104	-4.12312	-3.9325	-4.12488	-4.21671	-4.63527	-4.1075	24.8862	24.5526	24.5331	24.4353	24.1814	24.4289
Adk	P55264	Adk	P55264;A0A286YCD7	-1.6	0.00234954	-0.274711	-0.094636	-0.584249	1.2036	1.34752	1.30458	29.1099	29.726	29.2216	29.5342	29.6334	29.5677
Adnp	Q9Z103	Adnp	Q9Z103	-4.69	0.00025825	-4.59216	-5.34778	-5.6605	-0.290013	-0.731191	-0.507462	25.7921	28.5905	28.368	29.7348	29.6305	29.6328
Ado	Q6PDY2	Ado	Q6PDY2	0.149	0.69655	0.352333	0.659285	1.02372	0.178144	0.681099	0.729929	29.1784	29.3035	29.1318	28.7454	29.3137	28.8245
Adpgk	Q3UDS7	Adpgk	Q3UDS7;A0A1L1SSF2;Q8VDL4	-3.81	0.0415733	-3.24816	-3.16438	-7.13082	-0.900599	-0.991464	-0.235925	26.2383	26.8403	24.5458	27.7754	27.9876	28.0093
Adprh	P54923	Adprh	P54923	0.12	0.632753	3.01962	3.15688	2.91949	2.86018	3.01171	2.86317	32.1174	31.9937	32.0459	31.6663	31.8341	31.6575
Adprhl2	Q8CG72	Adprhl2	Q8CG72	-1.23	0.257548	-3.46979	-0.976457	-0.613905	-0.592573	-0.159405	-0.628949	27.013	27.1682	27.4536	27.6411	27.2896	27.441
Adra2a	Q3URE6	Adra2a	Q3URE6;Q01338	-2.04	0.390685	-7.52239	-4.02516	-5.64842	-3.67253	-0.586239	-6.8123	24.1809	23.9688	22.4988	24.371	27.368	23.8074
Adrbk2	Q3UYH7	Adrbk2;Grk3	Q3UYH7;Q8BVT9	-0.0111	0.977914	-5.53638	-6.16491	-5.52436	-5.42281	-6.01096	-5.75843	23.9562	23.8575	24.6513	23.2943	23.931	24.2759
Adsl	P54822	Adsl	P54822;E9Q242;E9Q3T7	-0.0289	0.945483	1.0852	1.99207	1.39143	1.29117	1.47074	1.7935	30.9591	30.7627	30.6543	30.6346	30.5712	30.6093
Adss	P46664	Adss;Adssl1	P46664	0.495	0.0995385	3.10059	2.98518	2.68871	2.37912	2.51793	2.39211	32.0276	31.6432	31.8852	31.5186	31.3378	31.2288
Afap1	A0A1D5RLL0	Afap1	A0A1D5RLL0	-3.4	0.272264	-7.51484	1.54928	-1.75849	0.369118	1.43406	0.677277	23.7341	27.4967	26.6207	28.6447	27.8695	28.494
Afap1.1	Q80YS6	Afap1;Afap1l1	Q80YS6;E9Q8X9	-0.541	0.310338	0.145894	-0.980223	0.267433	0.592848	0.169466	0.293474	29.4612	29.4059	30.1308	29.3339	29.2402	29.3065
Afdn	D3YUD2	Afdn	D3YUD2;D3Z7L2	1.05	0.053521	-1.71074	-2.20154	-2.18731	-2.85726	-2.69263	-3.69326	26.3023	25.9155	26.46	25.6124	25.6501	25.1334
Aff4	Q9ESC8	Aff4	Q9ESC8;B7ZC42	-0.97	0.33492	-7.62023	-5.40768	-7.68297	-5.8917	-5.25408	-6.65437	23.5094	24.4743	23.8604	23.5509	25.2505	24.0697
Afg1l	Q3V384	Afg1l	Q3V384;E9Q4K2;F6VT60	-1.51	0.0571879	-4.17427	-5.22664	-3.49861	-2.42142	-2.70881	-3.24596	25.8227	25.1071	25.7708	26.6494	26.5172	26.2138
Afg3l2	Q8JZQ2	Afg3l2	Q8JZQ2	-1.19	0.0351102	-0.30876	0.655042	0.0743548	0.929263	1.55519	1.51571	30.5419	30.7363	30.611	31.16	31.5076	31.1546
Aftph	Q80WT5	Aftph	Q80WT5;H3BJH7;H3BKM5	0.516	0.480903	-0.988719	-2.90547	-2.20035	-2.97179	-2.49874	-2.17081	28.7688	27.8797	27.2328	26.1549	28.229	27.648
Agap1	A0A087WRF2	Agap1	A0A087WRF2;Q8BXK8;E9Q3K3	-0.338	0.210042	0.388384	0.0519932	0.246534	0.653309	0.580625	0.466954	30.4723	29.9643	30.1746	29.9309	29.5662	29.6854
Agap1.1	A0A1D5RLD2	Agap1	A0A1D5RLD2	0.266	0.929849	-2.27075	-6.86949	-2.39874	-5.35256	-6.98448	0.000387577	24.827	24.5838	23.8879	24.2426	24.2329	25.7849
Agap2	Q3UHD9	Agap2	Q3UHD9	-0.133	0.654068	0.528911	1.01406	0.658341	0.82557	0.78227	0.99216	31.1344	31.4255	31.2797	30.9321	30.9461	30.9749
Agap3.1	F8VQE9	Agap3	F8VQE9;Q8VHH5	0.81	0.154338	1.9711	1.5732	1.44783	1.38215	1.1024	0.0765281	31.4897	31.0783	31.0893	30.8093	30.7342	30.5989
Agbl2	A0A0B4J1L6	Agbl2	A0A0B4J1L6;Q8CDK2	-1.14	0.0211488	-6.05919	-6.04053	-6.68992	-5.13165	-4.86928	-5.37466	24.7824	24.8859	23.925	24.6846	24.7071	24.438
Agfg1	A0A087WNV1	Agfg1	A0A087WNV1;A0A087WSR7;A0A087WR52;Q8K2K6	0.634	0.0900352	2.04509	2.19124	2.34966	1.48614	1.26387	1.93345	30.7313	31.139	31.0403	30.0087	30.2014	30.2708
Agfg2	Q3U2K8	Agfg2	Q3U2K8;Q80WC7;Q3TBU7	0.0931	0.836576	0.968055	1.17705	1.06773	0.335614	1.22519	1.37264	29.5382	29.4462	29.5123	29.3809	29.6412	29.794
Agk	Q9ESW4	Agk	Q9ESW4	-0.28	0.27005	2.60649	2.6141	2.84206	3.01183	2.8805	3.01094	31.7202	32.1144	32.0731	31.4847	31.8615	31.9754
Agl	F8VPN4	Agl	F8VPN4;A0A0G2JGI9;F6XXE6	-0.316	0.369278	-2.01479	-1.4352	-1.43423	-1.29061	-1.10257	-1.54264	29.6126	30.0916	29.9598	29.5463	29.3653	29.0813
Ago1	Q8CJG1	Ago1;Ago4	Q8CJG1;H3BJ70	-2.42	0.00236067	-3.59711	-4.44832	-4.46469	-1.97686	-1.48606	-1.78941	27.2481	26.1993	26.3363	28.2135	28.3347	27.9807
Ago2	Q8CJG0	Ago2;Ago3	Q8CJG0	-3	0.00636051	-3.0868	-2.96692	-4.72294	-0.749605	-0.664113	-0.370116	27.672	26.5046	24.8643	29.6334	29.179	29.8945
Agpat1	A0A0R4J263	Agpat1	A0A0R4J263;O35083	-0.391	0.212306	1.38184	1.49463	1.6848	1.61212	2.11418	2.00935	29.8545	29.9173	29.9599	29.9746	30.0014	29.7414
Agpat3	Q9D517	Agpat3	Q9D517	-1.15	0.00457905	0.471821	0.418604	0.340518	1.694	1.45931	1.53504	29.3787	29.5396	29.4271	29.8944	29.8537	29.8511
Agpat4	Q8K4X7	Agpat4	Q8K4X7	-1.57	0.00221099	0.762354	0.504807	0.462147	1.95861	2.26652	2.20538	29.9727	29.9356	30.0072	30.4639	30.8761	30.6839
Agpat5	F8WGD9	Agpat5	F8WGD9;Q9D1E8	-0.38	0.422323	-1.16582	-1.8922	-0.772783	-0.942739	-1.13266	-0.614662	27.3626	27.4696	27.4595	27.294	27.5649	27.6555
Agps	A2AL50	Agps	A2AL50;Q8C0I1;A2AL49	-2.1	0.0146941	-4.79207	-5.73053	-6.47787	-3.33803	-3.7737	-3.58953	25.3974	23.2382	24.3629	26.6182	26.1592	25.1465
Agrn	M0QWP1	Agrn	M0QWP1	2.83	0.00486232	-2.38247	-1.8086	-2.39635	-5.76278	-4.18101	-5.11954	28.8302	29.2047	28.9388	25.5809	26.3858	25.9978
Agtpbp1	Q641K1	Agtpbp1	Q641K1;F6ZCF0	-0.269	0.408418	-0.269349	-0.929987	-0.434721	-0.241874	-0.250645	-0.333856	30.4092	29.968	30.3338	30.3427	30.0057	30.0169
Ahcy	P50247	Ahcy	P50247	-0.114	0.668755	2.63811	2.61358	2.96113	2.82436	2.87844	2.85064	32.1532	32.0601	32.2033	31.9522	31.9029	31.9107
Ahcyl1	Q80SW1	Ahcyl1	Q80SW1	-0.689	0.0349721	1.48204	1.71405	1.53613	2.37392	2.08915	2.33488	31.232	30.9902	31.1203	31.4498	31.2485	31.3313
Ahcyl2	F8WGT1	Ahcyl2	F8WGT1;Q68FL4;F8WI65;H3BKT5	-0.835	0.0346702	-0.898718	-0.458065	-0.892547	-0.162285	0.258461	0.159445	28.6444	28.8359	28.9425	29.4292	29.4446	29.4769
Ahdc1	Q6PAL7	Ahdc1	Q6PAL7	0.128	0.945483	-6.74486	-1.77943	-6.26303	-4.92076	-4.74587	-5.50419	24.3426	24.2434	24.029	25.6163	25.6956	25.4997
Ahi1	A0A1L1SQE2	Ahi1	A0A1L1SQE2;E9QP54;Q8K3E5	-1.21	0.15042	-5.88249	-6.72784	-7.91978	-6.19099	-5.5898	-5.11279	NA	NA	NA	NA	NA	NA
Ahsa1	Q8BK64	Ahsa1	Q8BK64	-0.0656	0.801747	3.17768	3.42029	3.32644	3.24861	3.37674	3.49572	32.2952	32.5859	32.2196	32.1766	32.2328	32.4289
Ahsa2	F6S1R2	Ahsa2	F6S1R2;Q8N9S3;A2AF81	-0.739	0.198156	-2.33965	-1.31989	-2.81958	-1.4871	-1.41076	-1.36375	26.4281	27.222	26.2783	27.3007	27.0878	27.1604
Aida	Q8C4Q6	Aida	Q8C4Q6	-0.121	0.777419	-0.342951	-0.382745	-0.926426	-0.443027	0.00750097	-0.85231	28.8501	28.0612	28.0332	27.7037	27.9472	27.1839
Aifm1	B1AU25	Aifm1	B1AU25;Q9Z0X1	-2.55	0.00992506	0.294103	-1.62332	-0.696769	1.81422	1.94199	1.85852	30.1609	28.8419	30.0756	31.1554	30.9479	31.1573
Aifm3	Q3TY86	Aifm3	Q3TY86	-0.0176	0.988231	-6.88739	-3.74939	-4.34948	-5.66268	-5.111	-4.15968	24.1478	26.0221	25.1826	23.5296	24.7054	24.0023
Aig1	H7BX91	Aig1	H7BX91;Q9D8B1	-4.27	0.000487671	-5.86013	-6.17052	-6.70062	-1.40081	-2.42369	-2.11176	23.1508	23.7119	23.9242	26.3532	25.241	25.5202
Aimp1	Q3UZG4	Aimp1	Q3UZG4;P31230	-3.86	0.00123678	-0.443021	-0.15798	-0.0205518	3.2022	4.55056	3.19361	29.3871	29.4804	29.4096	31.9538	32.4538	32.4664
Aimp2	Q8R010	Aimp2	Q8R010	-6.07	0.000127821	-5.84463	-6.85638	-6.2873	-0.614754	0.00686624	-0.177695	24.0974	23.8193	23.8881	27.9489	28.2808	28.2712
Aimp2.1	Q8R3V2	Aimp2	Q8R3V2	-3.07	0.051203	-3.76993	-3.60672	-7.0903	-1.92331	-1.85896	-1.48826	24.3921	24.3024	23.9101	26.2858	26.2609	26.5988
Aip	O08915	Aip	O08915;D3YW40	-0.00706	0.984555	0.727265	1.4942	0.810657	1.08106	0.939544	1.0327	29.5342	29.8554	29.7119	29.3957	29.1643	29.3289
Ajap1	A2ALI5	Ajap1	A2ALI5	-4.05	0.00030518	-6.21721	-6.72037	-7.0574	-2.57735	-2.94059	-2.33666	24.6311	23.1972	23.2298	26.0639	25.6113	25.7548
Ajm1	A2AJA9	Ajm1	A2AJA9	-0.587	0.410762	-1.00616	-2.96459	-2.23412	-1.19955	-1.61629	-1.62744	29.8403	28.1512	27.8132	28.9595	28.0638	28.3295
Ak1	Q9R0Y5	Ak1	Q9R0Y5	0.395	0.155463	5.90613	6.10886	6.02459	5.47239	5.80581	5.57499	33.9658	34.0706	33.9593	33.6016	33.9621	33.7282
AK157302	I3ITR1	AK157302;Isca1	I3ITR1;Q9D924	-2.22	0.000805412	-2.18036	-1.67155	-1.93745	0.202805	0.222282	0.45305	24.4747	23.6152	24.1578	28.2472	27.731	27.9093
Ak2	Q9WTP6	Ak2	Q9WTP6	-1.39	0.00811622	0.00628515	-0.348469	0.333357	1.51368	1.15636	1.50141	28.7543	28.5619	28.9259	29.7858	29.4153	29.5265
Ak3	Q9WTP7	Ak3	Q9WTP7	-1.46	0.00305962	1.32377	1.18268	1.45493	2.73358	2.60714	2.99087	30.3281	30.2142	30.5777	31.3807	30.9212	30.9874
Ak4	Q9WUR9	Ak4	Q9WUR9;A2ARF6;F6TEU8	-2.76	0.00455738	0.21273	-1.28829	-0.120467	2.11364	2.39048	2.57882	29.1743	27.7267	29.2489	30.8112	30.3858	30.3895
Ak5	Q920P5	Ak5	Q920P5	-0.691	0.189174	1.01684	1.61231	1.67316	1.48952	2.63702	2.24978	30.9205	30.7677	30.8725	31.2163	31.2438	31.1829
Ak6	Q8VCP8	Ak6	Q8VCP8	-0.497	0.763527	-3.98752	-6.10686	-6.59783	-3.73395	-7.37625	-4.0923	23.9998	23.8053	23.9708	24.02	24.341	23.5397
Ak9	G3UYQ4	Ak9	G3UYQ4	-0.0659	0.926555	-5.13585	-6.50573	-5.34052	-4.90301	-5.64075	-6.24063	NA	NA	NA	NA	NA	NA
Akap1	O08715	Akap1	O08715	-1.87	0.00563668	-3.38925	-2.9579	-2.52715	-0.913892	-0.903361	-1.45785	27.012	26.9827	27.4466	28.71	28.2422	27.8002
Akap10	O88845	Akap10	O88845	0.79	0.14061	-0.648126	-1.4853	-0.707974	-1.20626	-1.8166	-2.18989	28.8108	28.8158	28.591	28.535	27.8042	27.6821
Akap11	E9Q777	Akap11	E9Q777;E9Q774	-2.23	0.00110902	-6.48711	-6.57039	-6.67905	-4.29734	-4.04058	-4.71114	NA	NA	NA	NA	NA	NA
Akap12	Q9WTQ5	Akap12	Q9WTQ5	0.972	0.0279093	-0.308518	-0.630408	-0.140662	-1.53511	-0.980359	-1.48087	30.0903	30.0002	30.4643	29.2684	29.6148	29.4827
Akap5	H3BIV5	Akap5	H3BIV5;D3YVF0	-1.73	0.010991	0.122147	-1.10591	-0.444967	1.15844	1.2494	1.36036	29.7962	29.564	29.597	30.7988	30.6918	30.7846
Akap6	E9Q9K8	Akap6	E9Q9K8;Q6PGB9	-3.04	0.0661662	-8.27507	-5.03821	-8.02881	-5.2283	-2.89327	-4.11417	26.6671	26.7971	25.6638	26.3315	27.5517	26.7936
Akap7	O55074	Akap7	O55074;Q7TN79	0.687	0.166147	2.55194	2.84388	2.52515	1.26155	2.25102	2.3488	30.0335	29.8406	29.8687	29.0176	29.0758	29.148
Akap8	Q9DBR0	Akap8	Q9DBR0	-5.21	0.00179743	-7.21515	-6.25002	-6.8932	-0.788532	-2.91481	-1.01798	23.3762	23.7528	24.6955	27.6002	27.328	28.5497
Akap8l	A0A494B9L0	Akap8l	A0A494B9L0;Q5RL57;Q9R0L7	-5.97	0.000253359	-7.3112	-6.78828	-5.96007	-1.0209	-0.244547	-0.87095	24.5881	24.8966	24.6628	28.4039	28.5407	28.4975
Akap9	E9QQ10	Akap9	E9QQ10;Q70FJ1	-4.02	0.0211359	-8.38894	-7.01285	-4.5559	-2.65485	-2.30462	-2.94994	24.0159	24.5264	23.4742	29.8964	29.7207	29.5528
Akr1a1	Q9JII6	Akr1a1	Q9JII6;B1AXW3	0.0601	0.86119	3.77662	3.67569	3.3032	3.39629	3.83424	3.34463	32.8721	32.9115	32.8977	32.4658	32.2486	32.2325
Akr1b1	P45376	Akr1b1;Akr1b3	P45376	0.393	0.133398	4.9677	5.0963	4.89306	4.49846	4.64738	4.63213	33.8227	33.7944	33.8736	33.5439	33.4801	33.3535
Akr1b10	D3Z494	Akr1b10;Akr1b8	D3Z494;G5E895	-0.659	0.110029	-3.38558	-2.76068	-3.10887	-2.04927	-2.67179	-2.55802	26.3998	25.6667	26.5469	26.3116	25.6139	25.3963
Akr1b7	P21300	Akr1b7	P21300	-1.32	0.022228	-5.73131	-6.16903	-5.71381	-3.98232	-4.7051	-4.96319	23.4254	22.8494	23.5124	24.9237	24.1116	23.8208
Akr1e2	Q9DCT1	Akr1e2;Akr1e1	Q9DCT1;Q8CEB6	-0.621	0.429675	-0.701327	1.44164	0.888693	1.4083	0.95329	1.13102	29.3724	30.023	30.0974	29.6219	29.5929	29.5427
Akr7a2	Q8CG76	Akr7a2	Q8CG76	-0.416	0.169063	1.77886	1.45576	1.32606	1.79665	2.05239	1.95934	30.2971	30.2471	30.0743	30.3884	30.7529	30.6738
Akt1	P31750	Akt1;Akt2	P31750;D3Z783;D3YXX3	0.121	0.662995	0.324662	-0.0702353	0.0239972	-0.0256776	0.06332	-0.121535	29.5723	29.5162	29.392	29.461	29.5974	29.4072
Akt1s1	Q9D1F4	Akt1s1	Q9D1F4;F6R8S6;E9QKI5;E9QKI4;D3Z4W3;D3Z4R0	0.475	0.26222	0.486107	0.450974	-0.0959851	0.254783	-0.567858	-0.271665	28.3851	28.2841	28.0963	28.122	28.2784	27.7959
Akt2	Q60823	Akt2	Q60823;F8WHG5	-2	0.0864315	-6.30183	-3.30252	-4.95294	-3.00194	-2.46395	-3.10295	24.3943	26.9315	25.6586	25.5853	26.6476	25.9991
Akt3	Q9WUA6	Akt3	Q9WUA6	0.609	0.185657	1.64257	1.322	1.04925	1.2396	0.689971	0.256633	31.1634	30.5845	30.7519	30.4534	30.0072	29.8721
Aktip	D3Z2J4	Aktip	D3Z2J4;Q64362;D3Z632	-2.72	0.00850152	-2.68793	-0.964388	-1.08952	1.26371	0.886811	1.27787	26.9533	28.0107	27.7172	29.5624	29.4123	29.4232
Alad	P10518	Alad	P10518	-0.557	0.132202	0.674032	-0.0473924	0.351716	0.947463	0.991683	0.709298	29.7481	29.1303	29.1485	29.1571	29.2374	28.8961
Alb	P07724	Alb	P07724	3.23	0.0204852	-4.66333	-1.75881	-2.47974	-5.82196	-6.51391	-6.25329	25.4394	28.0611	26.7017	23.9755	24.474	23.5466
Alcam	E9Q3Q6	Alcam	E9Q3Q6;Q61490;E9Q4G8	-0.486	0.186704	2.31224	2.10882	1.90234	2.18622	2.75829	2.83566	31.748	31.6155	31.6543	31.9387	31.9843	31.9978
Aldh18a1	Q9Z110	Aldh18a1	Q9Z110	-2.15	0.00101128	0.384688	-0.0592389	0.290052	2.42839	2.12469	2.51327	31.1722	30.5114	31.1146	32.3736	32.1444	32.2864
Aldh1a1	P24549	Aldh1a1	P24549	2.32	0.0367835	-1.14527	1.09065	-0.473366	-1.75635	-2.9882	-2.74575	27.5505	30.0725	28.0249	27.5438	28.1261	28.0374
Aldh1a3	Q9JHW9	Aldh1a3	Q9JHW9;G3UWP3	1.56	0.186077	-4.16461	-6.21024	-4.04467	-5.03461	-7.22113	-6.84473	25.3532	24.8513	25.3435	24.25	23.948	23.952
Aldh1b1	Q9CZS1	Aldh1b1	Q9CZS1	-1.06	0.0161485	1.33499	0.938629	1.46494	2.50962	2.33126	2.09103	30.8328	30.7943	30.7126	31.3298	31.2903	31.2163
Aldh1l1	Q8R0Y6	Aldh1l1	Q8R0Y6	-4.16	0.0173382	-4.21239	-6.43305	-2.61691	-0.360207	-0.279777	-0.148879	27.2636	24.2768	27.8119	30.3903	29.8392	29.8898
Aldh1l2	Q8K009	Aldh1l2	Q8K009;D3Z6B9	-1.23	0.00533981	0.626493	0.436646	0.544607	1.58325	1.72212	1.98469	31.3813	31.1741	31.2716	31.4933	31.933	31.846
Aldh2	P47738	Aldh2	P47738;A0A0G2JEU1	-1.59	0.00365177	1.17409	0.606065	1.02846	2.71339	2.4307	2.44019	30.3703	30.0387	30.296	31.8021	31.4711	31.4126
Aldh3a2	B1AV77	Aldh3a2	B1AV77;B1ATI0;P47740	-2.16	0.0149114	-1.56817	0.198706	-0.517555	1.40327	1.45943	1.71687	27.9841	29.0654	28.8344	30.2458	30.2926	30.3729
Aldh4a1	Q8CHT0	Aldh4a1	Q8CHT0	-1.25	0.003544	-0.190886	-0.228148	-0.136081	1.15553	0.907148	1.14116	29.8435	29.4651	29.7215	30.2179	29.7245	29.9832
Aldh5a1	Q8BWF0	Aldh5a1	Q8BWF0	-1.16	0.00701764	2.87092	2.46579	2.76689	3.86498	3.74706	3.97172	32.6629	32.1747	32.433	33.2245	33.047	33.0955
Aldh6a1	Q9EQ20	Aldh6a1	Q9EQ20	-1.95	0.0095151	-0.0780503	-1.29244	-0.132359	1.35566	1.52762	1.47213	30.0554	29.2007	29.6637	30.3664	30.7094	30.7409
Aldh7a1	Q9DBF1	Aldh7a1	Q9DBF1;G3UYR8	-0.718	0.181461	-0.715921	0.589222	0.241196	0.882141	0.84406	0.541549	29.208	29.7022	29.9086	29.7558	29.5682	29.1637
Aldh9a1	Q9JLJ2	Aldh9a1	Q9JLJ2;Q3U367	-0.0717	0.87064	1.23597	2.11422	1.6873	1.74859	1.43319	2.07089	31.1476	31.245	31.1725	30.861	31.0099	31.0345
Aldoa	P05064	Aldoa;Aldoart1;Aldoart2	P05064;A6ZI44;D3YWI1;Q9CPQ9;A6ZI46;D3Z510;A0A0U1RPN8	0.653	0.0340231	7.86417	7.64221	7.69166	7.06503	7.16593	7.00868	37.0793	36.7068	36.9485	36.0313	36.1341	35.9863
Aldob	Q91Y97	Aldob	Q91Y97	-0.313	0.847657	-6.42512	-3.51317	-7.08882	-5.69792	-3.77968	-6.60922	23.7986	25.461	23.977	23.5796	24.4941	23.9079
Aldoc	P05063	Aldoc	P05063	0.163	0.557339	3.77857	4.14462	4.09795	3.85038	3.71697	3.96514	33.2043	33.2098	33.2975	32.8626	32.7378	32.8947
Alg1	Q921Q3	Alg1	Q921Q3	0.285	0.522254	-0.940626	-1.11496	-1.36735	-0.887298	-1.43334	-1.95683	28.4867	27.9346	28.304	28.1215	27.5455	27.4476
Alg10b	Q3UGP8	Alg10b	Q3UGP8	-7.98	0.000114911	-6.5091	-6.59683	-7.87103	0.758147	1.18525	1.01126	23.9298	24.372	24.1717	29.9788	29.8032	29.6843
Alg11	Q3TZM9	Alg11	Q3TZM9	-0.0175	0.973874	-1.82546	-2.31989	-2.28135	-1.41282	-2.41867	-2.54276	27.8483	27.1706	26.5968	26.6611	25.1914	25.2654
Alg2	Q9DBE8	Alg2	Q9DBE8;F6RBY3	-0.881	0.0153244	3.27516	3.51335	3.58551	4.45813	4.23887	4.32105	32.5245	32.5435	32.6623	33.3808	33.1032	33.1284
Alg5	Q9DB25	Alg5	Q9DB25	-1	0.0119527	-1.02341	-1.18942	-1.32979	-0.0537382	-0.391957	-0.0918067	27.9255	27.4859	27.5322	27.7875	27.6709	27.6873
Alg9	Q8VDI9	Alg9	Q8VDI9	-1.71	0.0281335	-3.15315	-3.27836	-2.20914	-0.513807	-1.20876	-1.77613	26.6604	26.7471	27.317	28.1615	28.0558	27.8242
Alkbh8	A0A1D5RL93	Alkbh8	A0A1D5RL93;Q80Y20	-3.36	0.110899	-4.70485	-8.56614	-7.08878	-5.92484	-2.26005	-2.10138	23.4344	24.2699	24.4255	23.7779	25.5567	25.6826
Alms1	A0A1D5RMI8	Alms1	A0A1D5RMI8;Q8K4E0	0.866	0.0704523	-5.46256	-4.44012	-5.02173	-5.86399	-5.69567	-5.96157	26.4337	26.8921	26.7619	27.4208	27.4998	23.3861
Als2	Q920R0	Als2	Q920R0	-0.389	0.324079	-2.23188	-3.04344	-2.19592	-2.14118	-2.09115	-2.07189	28.7695	28.1268	28.9308	28.3514	28.2004	28.8328
Alyref	O08583	Alyref;Alyref2	O08583;G3X9I4;Q9JJW6	-10.5	6.07607e-05	-7.12943	-6.70133	-7.86747	2.80325	3.57	3.30936	22.5736	23.14	23.5272	31.5952	29.7646	32.1353
Amacr	O09174	Amacr	O09174	-2.33	0.371458	-4.6449	-0.169042	-7.89795	-2.53374	-1.65679	-1.51903	NA	NA	NA	NA	NA	NA
Amdhd2	F7CUP3	Amdhd2	F7CUP3;F6UP77;Q8JZV7	-1.72	0.188544	-2.46464	-3.67297	-5.80858	-3.1798	-2.00886	-1.5921	26.4523	26.2764	23.5258	26.2734	26.0054	26.2394
Amer2	A0A0R4J030	Amer2	A0A0R4J030;Q8CCJ4;A0A286YD03;A0A286YCG0	-0.146	0.683357	-0.365406	-0.277304	0.157286	0.20128	-0.354559	0.105196	29.0438	29.8842	29.7553	29.2357	29.3467	29.1522
Amfr	Q9R049	Amfr	Q9R049	-1.27	0.0615731	-2.48479	-3.51438	-2.05614	-1.20918	-1.78502	-1.25626	27.35	26.9216	27.5104	27.9259	27.6641	27.8457
Amigo1	Q80ZD8	Amigo1	Q80ZD8	-0.466	0.802346	-3.22178	-7.08474	-4.59573	-3.28272	-6.7295	-3.49244	NA	NA	NA	NA	NA	NA
Amn1	B8JKU8	Amn1	B8JKU8;B8JKV0;B8JKU9;A0A0N4SVR2	-0.167	0.810267	-4.06741	-3.31356	-3.92729	-3.87088	-4.3225	-2.61325	24.7505	25.2215	24.7705	24.7327	24.1729	24.3803
Ampd2	A2AE27	Ampd2	A2AE27;Q9DBT5	0.575	0.0702653	0.713671	1.06019	0.960824	0.505354	0.19799	0.307394	31.0382	30.5028	30.5663	30.425	30.1924	30.1988
Ampd3	A0A1L1SRX2	Ampd3	A0A1L1SRX2;O08739	-3.84	0.101449	-7.33148	-1.86524	-6.28247	-2.00363	-2.23678	0.276004	23.7669	28.4183	23.8288	27.893	28.2127	29.4527
Amph	A0A0G2JEG8	Amph	A0A0G2JEG8;Q7TQF7	0.411	0.191584	4.85202	5.3428	5.11605	4.72718	4.84932	4.50199	34.4149	34.5431	34.5151	33.7201	33.9311	34.0303
Amz2	B1AT59	Amz2	B1AT59;Q400C8;B1AT60	-1.83	0.00666949	-2.64802	-2.50083	-3.25565	-1.41506	-0.712476	-0.775299	27.5555	27.6009	26.8182	27.0407	26.6099	26.9086
Anapc1	P53995	Anapc1	P53995;A2ATQ5	-2.03	0.0131833	-2.80208	-3.3639	-4.18511	-1.01876	-1.83949	-1.40846	28.7757	28.1249	27.6877	29.6897	29.4026	29.5502
Anapc2	Q8BZQ7	Anapc2	Q8BZQ7	-1.28	0.00388256	-2.25529	-2.03186	-1.90379	-0.785989	-0.848648	-0.708542	28.4638	28.1273	28.39	28.7783	28.5829	28.7403
Anapc4	Q91W96	Anapc4	Q91W96	-2.14	0.000611223	-2.92514	-3.17518	-3.08692	-0.865589	-1.109	-0.799789	27.7558	26.2008	27.3199	28.8202	28.4955	28.7291
Anapc5	A0A0G2JE03	Anapc5	A0A0G2JE03;Q3TWF7;A0A0G2JDM7;Q8BTZ4;A0A0G2JDE8;A0A0G2JFH0	-0.972	0.0423596	-1.181	-2.04444	-1.65733	-0.403875	-0.840569	-0.721959	28.9916	28.5084	29.0044	29.3688	28.9559	28.9027
Anapc7	D3YU58	Anapc7	D3YU58;Q9WVM3	0.169	0.850178	-2.93448	-2.54846	-2.45327	-1.68907	-2.599	-4.15398	27.0395	26.3171	27.2109	27.4019	26.6574	25.991
Angel2	Q8K1C0	Angel2	Q8K1C0	-2.6	0.0834146	-6.49738	-4.52156	-4.43382	-2.86798	-3.99276	-0.788873	24.1452	26.3968	26.5173	26.5694	26.6413	27.7756
Angptl1	Q640P2	Angptl1	Q640P2	0.668	0.704476	-4.23758	-6.53026	-2.56369	-6.01608	-6.17128	-3.14891	NA	NA	NA	NA	NA	NA
Angptl6	Q8R0Z6	Angptl6	Q8R0Z6	-2.36	0.0128865	-6.78116	-6.1292	-7.67985	-4.58222	-3.91631	-5.01296	23.8499	23.2661	24.0832	24.8092	24.3858	24.2564
Ank1	G5E8J2	Ank1	G5E8J2;B7ZW98;E9QNT8;G8JL84;D3YTV8;D3Z5M4;Q0VGY9;A0A0R4J1N7;Q02357;G3UY11;D6RJ51	-0.973	0.0799045	-6.75391	-6.2828	-6.40339	-5.36383	-6.18084	-4.97594	23.9623	25.3973	23.486	25.251	25.4284	25.2274
Ank2	S4R2F3	Ank2	S4R2F3;Q8C8R3	1.33	0.0250991	-6.16463	-5.38039	-6.42952	-7.29534	-7.58553	-7.07731	26.3175	25.9872	26.2415	25.358	24.8925	23.9157
Ank2.1	S4R2R5	Ank2	S4R2R5	0.314	0.657179	-6.3888	-6.42692	-5.22526	-5.72535	-7.14132	-6.11727	25.9351	24.7031	27.1693	23.3951	24.3041	25.8932
Ank2.2	S4R2T7	Ank2	S4R2T7	2.72	0.00811622	-2.63502	-1.86184	-1.89767	-4.01632	-4.79563	-5.74376	27.8547	28.1266	28.2439	26.2846	27.6346	27.144
Ank3	A0A087WNU5	Ank3	A0A087WNU5	-3.54	0.00648153	-5.49997	-7.38579	-5.19658	-2.55569	-2.68085	-2.22396	27.8905	23.3883	26.9126	29.3203	29.0563	29.4095
Ank3.2	G5E8K2	Ank3	G5E8K2;G5E8K5;S4R1S2;G5E8K3;S4R2S8;A0A1W2P812;S4R236	-2.46	0.0275388	-6.10349	-5.55484	-7.96316	-4.31623	-3.94927	-3.97233	26.644	24.6624	24.1099	27.1432	26.4249	26.2424
Ank3.3	S4R2K9	Ank3	S4R2K9	-0.761	0.1071	-7.0392	-7.11319	-6.36233	-5.67591	-6.40908	-6.14579	24.138	24.5049	24.2954	26.0375	25.215	25.4455
Ankfy1	Q810B6	Ankfy1	Q810B6	-0.431	0.105197	0.794277	0.92784	0.831829	1.1637	1.33653	1.34812	31.4551	31.3994	31.5243	31.4441	31.2268	31.3229
Ankh	Q9JHZ2	Ankh	Q9JHZ2	-6.09	0.000448484	-7.15013	-5.97579	-7.79595	-0.465768	-0.994672	-1.19893	24.0855	23.7289	23.9092	28.2327	27.9274	28.0207
Ankib1	Q6ZPS6	Ankib1	Q6ZPS6;A0A0G2JEA0	1.03	0.137253	-3.18275	-4.91002	-4.11531	-4.85034	-4.98349	-5.46544	26.4532	26.2773	26.2091	25.9493	25.3701	25.6494
Ankle2	Q6P1H6	Ankle2	Q6P1H6	-0.177	0.797643	-4.31647	-5.94997	-5.69611	-5.38247	-5.36151	-4.68854	25.7169	23.276	25.3334	25.5434	25.4751	24.9037
Ankmy2	Q3TPE9	Ankmy2	Q3TPE9	-0.67	0.0354633	0.953463	0.744127	0.833848	1.35772	1.54717	1.63728	30.0907	29.5959	30.0856	30.077	30.0521	30.1583
Ankrd13a	F7B209	Ankrd13a	F7B209;Q80UP5	-1.16	0.163913	-6.36995	-5.77079	-5.25924	-4.05144	-4.05245	-5.80583	22.6142	24.7007	24.1268	24.6789	23.5981	23.9647
Ankrd13c	Q3UX43	Ankrd13c	Q3UX43	1.08	0.366922	-3.89983	-4.22764	-4.25825	-7.24157	-4.04395	-4.35214	25.441	24.8305	24.9531	24.0645	24.9744	24.6335
Ankrd13d	Q6PD24	Ankrd13d	Q6PD24	0.531	0.280896	-0.398537	-0.46846	-1.47923	-1.5122	-1.05304	-1.37354	29.5658	28.8759	28.3315	28.1664	27.631	27.7784
Ankrd17	E9QKG6	Ankrd17	E9QKG6;A0A0G2JDZ9;E9Q804;Q99NH0;A0A1W2P6X1	-2.15	0.00641475	-5.35984	-6.29758	-6.0867	-4.22102	-3.28933	-3.78562	23.0766	24.5424	23.8708	27.0383	27.3914	27.0944
Ankrd27	A0A0R4J2C4	Ankrd27	A0A0R4J2C4;A0A0U1RPT7;Q3UMR0	-0.869	0.513397	-5.75021	-4.08213	-6.90757	-3.72859	-4.11594	-6.28845	23.1543	24.8636	24.0417	25.3584	24.8268	24.3073
Ankrd28	A0A2I3BQ07	Ankrd28	A0A2I3BQ07;Q505D1;A0A2I3BQJ1	-0.653	0.291418	-0.762845	-0.78158	-1.20005	0.682309	-0.832655	-0.635255	29.4619	29.1756	28.9386	29.6951	29.187	29.0808
Ankrd34a	B2RW11	Ankrd34a	B2RW11	0.259	0.645824	-0.270879	-0.975517	-1.45479	-1.67298	-0.713797	-1.09077	29.5623	28.1881	27.8829	27.8777	27.6602	27.5163
Ankrd34b	Q3UUF8	Ankrd34b	Q3UUF8	1.72	0.107923	-4.44481	-4.97083	-2.81111	-4.9683	-5.65693	-6.74889	26.1561	25.3222	24.9474	25.5886	24.5964	23.9641
Ankrd36.1	Q5QNR4	Ankrd36	Q5QNR4	-1.56	0.014816	-6.01505	-5.81428	-6.4053	-5.12772	-4.22491	-4.20829	23.8605	24.6621	24.6788	24.5176	24.9243	25.1766
Ankrd44	E9QNQ2	Ankrd44	E9QNQ2;B2RXR6;J3QK13	0.122	0.815975	-2.67429	-2.40417	-3.39152	-3.4962	-2.67077	-2.67017	27.9722	27.7273	26.9349	27.2728	26.8651	27.3433
Ankrd46	Q8BTZ5	Ankrd46	Q8BTZ5	-1.8	0.0708121	-1.75064	0.632612	-0.505614	0.976714	1.02533	1.76299	27.112	27.841	28.1287	28.2262	28.4239	28.3311
Ankrd50	D3Z643	Ankrd50	D3Z643	4.54	0.00421648	1.08177	1.86634	1.92984	-3.91736	-3.39531	-1.42948	29.701	30.2152	30.4221	23.744	23.3579	24.1607
Ankrd50.1	F7BE84	Ankrd50	F7BE84	0.864	0.0265535	-1.28502	-1.50063	-1.59258	-2.0549	-2.56626	-2.34792	28.8911	29.1594	29.4997	28.4649	28.0059	28.6626
Ankrd52	Q8BTI7	Ankrd52	Q8BTI7;F7BT68	-1.54	0.00603591	-5.40585	-5.90351	-5.09582	-3.95224	-3.95176	-3.87325	25.2468	24.7265	25.3671	25.9778	25.6374	25.3383
Anks1	A0A3B2WAQ7	Anks1;Anks1a	A0A3B2WAQ7;Q3UHP6;P59672;A0A3B2W4H6;A0A3B2W7H4	-0.133	0.931777	-3.60612	-3.6235	-7.37204	-4.19155	-5.57138	-4.44112	26.6047	26.4515	23.9163	26.0304	25.6994	25.5755
Anks1b	A0A0R4J2A2	Anks1b	A0A0R4J2A2	-1.81	0.0570211	-7.08032	-6.30974	-7.38988	-5.26116	-4.0091	-6.07842	22.9474	23.5956	23.5281	23.8813	24.3217	24.41
Anks1b.2	S4R286	Anks1b	S4R286;Q8BIZ1;S4R2H8;S4R2H3	0.978	0.0748562	-2.66782	-3.23842	-2.31714	-3.31103	-3.64889	-4.19798	27.8287	27.3639	28.0667	26.9302	26.8595	26.332
Ankzf1	J3QM81	Ankzf1	J3QM81;Q80UU1	-3.03	0.0825061	-3.89416	-8.43921	-6.90577	-3.32071	-3.71076	-3.10334	24.8372	22.773	23.6511	24.0398	27.6479	24.5866
Ano10	Q8BH79	Ano10	Q8BH79;A0A1L1SS60;A0A1L1SR14	-2.53	0.0179061	-4.62478	-4.68432	-2.75516	-1.16957	-1.81944	-1.49933	25.8285	25.4833	26.7886	27.6103	27.6468	27.7892
Ano8	A0A1L1SR96	Ano8	A0A1L1SR96;Q6PB70	-0.555	0.318242	-3.84803	-2.96974	-3.07198	-3.41076	-2.51245	-2.30219	25.7551	28.2713	26.0939	26.8935	28.0092	27.756
Anp32a	O35381	Anp32a;Anp32c	O35381;D3YYE1;D3Z7M9;F6UFG6	-3.6	0.000115762	1.16737	0.997555	0.933184	4.50938	4.60703	4.77361	29.9765	28.4862	28.581	32.3468	31.8854	32.5332
Anp32b	Q9EST5	Anp32b	Q9EST5	-7.65	0.00164991	-3.45537	-6.32201	-6.90006	2.04422	1.97627	2.23987	25.689	24.2737	23.5609	29.7702	29.8948	30.0585
Anp32e	E9Q5H2	Anp32e	E9Q5H2;E9PZF5;P97822	-8.76	0.00014399	-4.69769	-6.14558	-6.58033	2.85374	3.06424	2.93368	24.6814	23.7625	24.0223	30.2511	29.9562	29.922
Anxa1	A0A494BBD8	Anxa1	A0A494BBD8;P10107	1.14	0.0142661	-1.25082	-1.32959	-0.747113	-2.25869	-2.42666	-2.05646	27.3879	27.1058	27.6826	27.2677	27.3346	27.5876
Anxa10	Q9D272	Anxa10	Q9D272;Q9QZ10	-5.65	0.000108011	-7.12842	-6.63209	-7.29224	-0.981636	-1.50433	-1.61674	23.2833	24.098	25.0224	27.5094	26.8974	26.7523
Anxa11	D3Z7U0	Anxa11	D3Z7U0;P97384	-0.256	0.909107	-3.15245	-3.39088	-7.33544	-6.97513	-3.5169	-2.61883	26.2922	25.4355	24.3114	23.8538	25.2698	25.196
Anxa2	P07356	Anxa2	P07356;B0V2N7;B0V2N8;B0V2N5	1.77	0.000892237	2.24321	2.30091	2.16537	0.557188	0.341781	0.49895	31.2497	31.1696	31.4574	30.0569	29.7267	29.969
Anxa3	O35639	Anxa3	O35639	3.77	0.00930981	0.568969	1.08808	0.595589	-2.21384	-2.18489	-4.64683	28.8375	30.3619	30.0128	25.3863	26.2606	24.1784
Anxa5	P48036	Anxa5	P48036	0.246	0.439841	1.67477	1.04462	1.24389	1.11049	1.13452	0.980787	30.8374	29.8798	30.2643	30.5426	30.3122	30.1536
Anxa6	F8WIT2	Anxa6;Anxa4	F8WIT2;P14824	-1.5	0.00718074	1.50249	0.713529	0.995826	2.40433	2.66387	2.65235	31.7956	31.2024	31.7171	32.253	32.3992	32.5161
Anxa7	A0A2C9F2D2	Anxa7	A0A2C9F2D2;Q07076	-0.691	0.0389136	1.6824	1.73003	1.63725	2.169	2.60708	2.34573	31.0532	30.8722	30.9211	30.9985	30.9652	31.0016
Aox1	G3X8P9	Aox1	G3X8P9;O54754	0.701	0.310345	-5.98372	-6.48509	-5.56019	-6.66579	-7.59312	-5.87245	24.878	23.572	25.172	23.9627	23.631	23.9063
Aox2	Q5SGK3	Aox2	Q5SGK3	-1.01	0.303781	-6.62327	-7.25698	-6.15712	-7.11428	-4.51387	-5.37318	24.8344	23.5542	23.8969	23.3535	25.9858	25.5398
Ap1b1	O35643	Ap1b1;Ap2b1	O35643;Q5SVG5;Q5SVG4	0.152	0.596994	3.57391	3.96277	3.90766	3.83163	3.62221	3.53372	33.9976	33.8281	34.0089	33.8125	33.6199	33.6497
Ap1g1	Q8CBB7	Ap1g1;Ap1g2	Q8CBB7;P22892	-0.0546	0.848956	2.59134	3.01655	2.79951	2.75915	2.98812	2.82393	32.6014	32.5386	32.3722	32.6028	32.6181	32.5381
Ap1m1	P35585	Ap1m1;Ap1m2	P35585	-0.0208	0.940705	2.55983	2.85288	2.73945	2.59724	2.67385	2.94347	32.2027	32.0997	31.9927	31.7029	31.7782	31.7768
Ap1s1	P61967	Ap1s1;Ap1s3	P61967;D3Z0D6;D3YXN0;D3Z268	-1.43	0.0528983	0.418344	0.554644	-1.02494	1.30728	1.42995	1.49192	27.963	29.4166	28.5291	28.6548	28.9367	28.8746
Ap1s2	Q9DB50	Ap1s2	Q9DB50;Q3TIV9;Q8BW87;B1B0F6	-0.0487	0.981641	-2.22194	-6.83693	-5.84851	-3.17039	-4.73913	-6.85185	NA	NA	NA	NA	NA	NA
Ap2a1	P17426	Ap2a1	P17426	0.383	0.166051	4.62684	4.90905	4.93171	4.5392	4.44311	4.33628	35.032	35.2826	35.3475	34.7567	34.5504	34.5753
Ap2a2	P17427	Ap2a2;Ap2a1	P17427	0.489	0.0855452	5.17722	5.47797	5.24189	4.87333	4.77646	4.77982	35.606	35.4305	35.6415	35.0743	34.9704	34.9831
Ap2b1	Q9DBG3	Ap2b1	Q9DBG3;H3BIY9;H3BKM0	0.36	0.174707	5.28829	5.28323	5.01436	4.80657	4.90473	4.7938	35.3438	35.4485	35.0615	34.7864	34.8837	34.8281
Ap2m1	A0A338P6T4	Ap2m1	A0A338P6T4	0.7	0.131437	-1.86233	-2.15059	-1.16759	-2.21399	-2.38756	-2.67816	25.6845	25.2562	26.3212	25.2458	24.9083	24.5849
Ap2m1.1	Q3TWV4	Ap2m1	Q3TWV4;P84091	0.471	0.0989184	5.57898	5.90942	5.75502	5.23123	5.22693	5.37114	34.9786	35.1183	34.9794	34.493	34.4428	34.525
Ap2s1	P62743	Ap2s1	P62743;A0A0U1RPS0	0.0177	0.956341	5.67026	5.0638	5.25447	5.41738	5.18343	5.33455	32.657	31.9187	32.6419	32.7692	32.386	32.2595
Ap3b1	Q9Z1T1	Ap3b1	Q9Z1T1	-1.19	0.112566	-3.60107	-5.20343	-5.37444	-3.3654	-3.59528	-3.63762	26.7069	26.4726	25.78	26.7709	26.6501	26.2523
Ap3b2	Q9JME5	Ap3b2	Q9JME5	0.0997	0.696248	3.17806	3.15121	2.9512	3.04409	3.06154	2.87578	33.6908	33.6781	33.631	33.4957	33.3451	33.3212
Ap3d1	O54774	Ap3d1	O54774	-0.00338	0.988426	2.95728	3.10992	2.99762	2.92795	3.03389	3.1131	33.4207	33.4222	33.4781	33.3035	33.3965	33.3943
Ap3m1	Q9JKC8	Ap3m1	Q9JKC8;H7BWY2;A0A286YDZ6	0.027	0.915829	2.01063	1.84507	1.951	1.87087	1.82121	2.03359	31.1556	30.816	31.2803	30.8822	30.8408	30.8908
Ap3m2	Q8R2R9	Ap3m2	Q8R2R9	0.73	0.0433659	2.90605	3.34013	3.4481	2.44446	2.52325	2.53737	32.2686	32.2792	32.4591	31.6765	31.491	31.4561
Ap3s1	Q9DCR2	Ap3s1	Q9DCR2;A0A286YDU3	0.789	0.0573431	2.50105	2.8146	3.00384	1.61968	2.09999	2.23323	30.5861	30.353	30.7011	29.7766	29.8908	29.7167
Ap3s2	Q8BSZ2	Ap3s2	Q8BSZ2	0.0912	0.899696	0.213571	0.498769	0.283692	0.0293389	1.32879	-0.635741	28.4458	28.0052	28.2096	27.7875	28.5973	27.7753
Ap4b1	A0A0G2JFY6	Ap4b1	A0A0G2JFY6;B0V3P3;Q9WV76;B0V3P4	-1.45	0.0281505	-6.64992	-5.75692	-5.3495	-4.24178	-4.47819	-4.69573	24.3668	24.6963	24.6794	24.9343	25.0186	25.0057
Ap4e1	Q80V94	Ap4e1	Q80V94;H3BKM4;H3BL03;A2ASB3	-2.85	0.00455068	-7.25781	-6.95553	-5.70283	-3.55755	-3.78796	-4.00803	23.6199	24.2658	23.8406	26.8291	26.5436	26.4142
Ap4m1	Q9JKC7	Ap4m1	Q9JKC7	-1.09	0.46692	-3.66197	-6.12815	-6.78538	-6.11367	-3.19681	-4.00172	NA	NA	NA	NA	NA	NA
Ap4s1	Q9WVL1	Ap4s1	Q9WVL1	-2.69	0.173051	-2.43911	-7.39133	-6.97362	-2.09462	-3.44099	-3.20755	25.1856	24.2172	24.0386	25.2968	23.8612	24.0618
Apaf1	G3XA09	Apaf1	G3XA09;O88879	-0.626	0.274891	-5.89392	-6.27071	-5.93557	-4.85389	-6.26965	-5.09734	NA	NA	NA	NA	NA	NA
Apba1	B2RUJ5	Apba1	B2RUJ5	0.59	0.0435831	1.61551	1.72748	1.52292	1.056	1.07744	0.961863	31.494	31.4655	31.2782	30.8621	30.7437	30.4951
Apba2	A0A0U1RPM0	Apba2	A0A0U1RPM0;P98084	-2.12	0.0103635	-2.05529	-1.45664	-2.95858	0.185599	-0.231717	-0.0748596	27.798	27.4966	26.5705	28.8309	28.7621	28.7045
Apbb1	A0A0R4J2C6	Apbb1;Apbb2	A0A0R4J2C6;A0A0R4J2C1;Q9QXJ1;A0A087WR62;A0A087WPS7;A0A087WPI2;A0A087WQC5	0.65	0.0879096	1.00697	1.5851	1.55802	0.954832	0.555214	0.688907	30.8496	30.6983	30.9146	29.8785	29.7091	30.0119
Apc	B2RUG9	Apc	B2RUG9;E9QLQ9;Q61315;E9Q4H1	0.147	0.543452	-0.674676	-0.484047	-0.512341	-0.765026	-0.680754	-0.666706	31.5283	31.5101	31.5089	30.9989	30.8637	30.9158
Apc2	G5E832	Apc2	G5E832;D3YTR0;Q9Z1K7	-0.507	0.470631	-3.76236	-5.24039	-4.68332	-3.48139	-4.78773	-3.8973	27.205	27.4639	27.3044	27.4758	26.8476	27.2502
Apeh	A0A0R4J107	Apeh	A0A0R4J107;Q8R146	0.295	0.525009	-1.00479	0.0924488	-0.692777	-1.09227	-0.720419	-0.677566	29.2146	29.0965	28.9678	28.7478	28.5739	28.7903
Apex1	P28352	Apex1	P28352;F6QA74;D3Z6R9	-8.54	0.0025874	-3.32285	-6.86774	-7.65041	2.18691	2.95062	2.64575	26.0546	23.9222	23.8323	29.5422	31.4074	31.2356
Api5	O35841	Api5	O35841	-6.16	6.90202e-05	-3.79796	-3.88622	-3.22088	2.45122	2.45405	2.68256	23.7482	25.0815	25.2481	31.72	31.5758	31.7947
Apip	Q9WVQ5	Apip	Q9WVQ5	-1.55	0.00658414	-0.62416	-1.19574	-1.15782	0.232079	0.660707	0.786464	28.4124	28.0301	28.1588	29.1226	28.7585	28.6082
Aplp1	A0A0R4IZZ1	Aplp1	A0A0R4IZZ1;Q03157	1.64	0.0167111	-0.667915	0.109382	0.102484	-2.36786	-1.39893	-1.60876	29.0304	29.3912	29.6338	28.6822	28.3465	28.481
Aplp2.1	Q60709	Aplp2	Q60709;A0A1L1SS44	-0.0337	0.961137	-1.01333	-2.66965	-1.11222	-1.42247	-1.86666	-1.40505	28.4403	27.9625	28.369	28.2116	27.593	27.8177
Apmap	Q9D7N9	Apmap	Q9D7N9	-1.39	0.00575318	0.32968	0.539197	0.922081	1.9802	1.85761	2.12976	30.1075	30.0619	30.3239	30.9874	30.7475	30.8007
Apoa4	P06728	Apoa4	P06728	-2.75	0.0711366	-6.42145	-2.9562	-3.03331	-1.47223	-1.54001	-1.15956	24.1575	26.8599	26.0321	27.6267	27.5483	27.7221
Apob	E9Q1Y3	Apob	E9Q1Y3;E9Q414	-0.666	0.445225	-7.72771	-5.77548	-6.77263	-5.51271	-5.73827	-7.02584	24.094	26.5792	23.6996	24.1216	26.5767	25.2563
Apoe	P08226	Apoe	P08226	0.912	0.0136405	5.44907	5.57295	5.2977	4.68634	4.47811	4.42045	34.2371	33.9263	33.8916	33.2567	32.7409	32.5821
Apoo	Q9DCZ4	Apoo	Q9DCZ4	-0.713	0.122992	1.65804	1.42868	2.45987	2.45468	2.62494	2.60718	29.3944	29.7502	30.0629	30.1928	30.314	30.2701
Apool	Q78IK4	Apool	Q78IK4;B1AV14	-2.7	0.0827078	-1.9661	-6.05228	-3.83207	-1.58634	-0.890981	-1.25917	26.1366	24.1975	25.6977	27.4626	27.5403	27.3894
App	A0A2I3BQZ9	App	A0A2I3BQZ9;P12023;A0A2I3BPT1;Q3TWF3;A0A2I3BR03	-0.0421	0.899051	2.1548	2.51047	2.76053	2.33759	2.55416	2.66035	31.7317	32.1701	32.471	31.9999	32.0852	32.2408
Appbp2	Q9DAX9	Appbp2	Q9DAX9	-1.93	0.123451	-7.21165	-7.29669	-8.27316	-6.3861	-6.79761	-3.79549	24.0872	24.6413	23.4806	23.7324	24.1219	24.7878
Appl1	Q8K3H0	Appl1	Q8K3H0	0.176	0.640565	1.84474	2.6759	2.23022	1.93439	2.23435	2.05558	31.7135	32.2784	31.83	31.669	31.9024	31.8926
Aprt	P08030	Aprt	P08030	0.174	0.554471	3.56375	3.59661	3.86124	3.74794	3.3181	3.43489	32.1836	31.8605	32.1277	31.7244	31.2886	31.2452
Aqp9	D3YYD6	Aqp9	D3YYD6;Q9JJJ3	3.5	0.0951523	0.226976	0.517994	-0.152494	-6.57754	-1.51533	-1.82433	27.9378	27.9439	27.1781	24.115	25.6223	25.2805
Aqr	A2AQA7	Aqr	A2AQA7;Q8CFQ3	-3.38	0.000743207	-7.05537	-6.70823	-6.16398	-3.002	-3.67263	-3.09875	24.3086	23.675	23.8297	27.4745	27.403	27.2447
Araf	E9Q0P8	Araf	E9Q0P8	0.268	0.413438	-1.20984	-1.30092	-1.01338	-1.35656	-1.17478	-1.79773	28.1935	27.6608	28.2125	27.7628	27.3642	27.2048
Araf.1	Q8CAD1	Araf	Q8CAD1	-0.623	0.440282	-0.951438	-2.3639	-0.43049	-0.518575	-0.0775549	-1.27928	26.8843	27.0619	27.1415	27.6744	27.4593	26.3356
Arap2	E9QP44	Arap2	E9QP44;Q8BZ05	-0.982	0.078223	-6.71578	-6.94084	-7.92034	-6.02477	-6.25419	-6.35336	23.4134	23.7249	24.2636	24.9169	24.5982	24.4662
Arcn1	Q5XJY5	Arcn1	Q5XJY5	-1.92	0.0012347	1.19472	1.13289	1.0041	3.26129	3.04992	2.76703	30.9409	30.6167	30.6291	32.5244	32.1299	32.0459
Arf1	P84078	Arf1	P84078	0.15	0.733213	0.0671268	0.986476	0.373061	0.210043	0.09274	0.673859	28.986	28.3172	28.3385	23.6868	28.2317	27.8458
Arf2	Q8BSL7	Arf2;Arf3;Arf4	Q8BSL7	0.151	0.746923	1.31015	2.16838	1.52892	1.57397	1.90231	1.07885	29.8384	29.982	29.6451	29.198	29.3319	28.9008
Arf3	P61205	Arf3	P61205	0.546	0.25797	2.67793	3.24924	2.59741	2.66099	1.6979	2.52637	30.7833	30.9799	30.5011	30.4191	30.2459	30.3116
Arf4	P61750	Arf4	P61750;E9Q798	0.024	0.948893	4.81209	4.95535	5.32205	5.37294	4.66376	4.98073	32.4683	32.4568	32.7535	33.1223	32.5637	32.6415
Arf5	P84084	Arf5	P84084	0.416	0.193441	4.6393	5.02854	5.08658	4.31384	4.70939	4.48448	32.7934	32.7403	33.0091	32.4471	32.8743	32.6521
Arf6	P62331	Arf6	P62331	-0.144	0.792731	1.96561	3.06685	2.5214	2.10298	2.88414	2.99773	29.9454	30.6066	30.2545	30.2255	30.0693	30.1598
Arfgap1	V9GWV1	Arfgap1	V9GWV1;V9GXM1;Q3TGS9;Q9EPJ9	0.636	0.251215	0.963032	2.27514	2.00243	0.782381	1.26722	1.28188	29.9969	30.8981	30.6226	29.1142	29.9078	30.1163
Arfgap2	Q99K28	Arfgap2	Q99K28	-0.836	0.232455	-1.11114	-0.52083	-2.22033	-0.372056	-0.941605	-0.0304277	28.0098	28.5424	28.4344	28.7117	28.4305	28.9955
Arfgap3	A0A0R4J0T8	Arfgap3	A0A0R4J0T8;Q9D8S3	-0.848	0.29885	-0.581401	-2.69501	-2.22306	-1.42144	-0.688687	-0.845046	28.1631	28.0949	28.6485	28.1759	28.3596	27.9798
Arfgef1	G3X9K3	Arfgef1	G3X9K3	-1.06	0.0153319	-1.52892	-1.42761	-2.02695	-0.590986	-0.683285	-0.541879	30.1607	30.2154	30.3113	30.3011	29.9606	29.9358
Arfgef2	A2A5R2	Arfgef2	A2A5R2	-0.758	0.0246838	-1.67231	-1.47168	-1.81852	-0.87753	-0.973882	-0.837507	30.0621	30.089	29.8703	30.005	30.0332	30.0077
Arfgef3	Q3UGY8	Arfgef3	Q3UGY8;A0A1N9M5I8	-0.558	0.0503124	0.592915	0.668268	0.504419	1.06764	1.16372	1.20835	32.2265	32.1399	32.1093	32.3182	32.1592	32.1891
Arfip2	A0A1B0GS63	Arfip2	A0A1B0GS63;Q8K221;A0A1B0GSM3	-1.03	0.0569524	0.305165	1.37905	0.711401	1.58816	2.14152	1.7681	29.0103	30.1398	29.9268	30.1825	30.205	29.6438
Arfrp1	Q8BXL7	Arfrp1	Q8BXL7;E9PZK7	-4.91	0.000181369	-6.63297	-6.04961	-6.84023	-1.80787	-1.20496	-1.7821	24.0364	24.1121	23.8763	27.1429	26.0416	25.5307
Arg2	O08691	Arg2	O08691	-3.71	0.00529089	-4.47477	-6.70377	-6.28211	-2.3254	-2.02516	-1.97026	25.4396	23.5503	23.4365	26.3998	26.0053	26.0484
Arhgap1	Q5FWK3	Arhgap1	Q5FWK3;A2AH25	0.621	0.0422732	4.06397	4.23605	4.15834	3.40632	3.67379	3.51543	33.428	33.2978	33.4933	32.8025	32.8541	32.6439
Arhgap10	Q6Y5D8	Arhgap10	Q6Y5D8	-0.248	0.910402	-5.89965	-2.96207	-3.18221	-3.64356	-6.62522	-1.03093	22.3274	27.3542	27.2874	25.6515	23.5338	29.2129
Arhgap12	S4R203	Arhgap12	S4R203;S4R248;A0A0A0MQ95;B2RUJ8;S4R221;Q8C0D4	1.61	0.0998425	-4.68878	-4.70883	-4.65962	-6.46945	-7.49334	-4.91236	NA	NA	NA	NA	NA	NA
Arhgap20	D3YUH8	Arhgap20	D3YUH8;Q6IFT4	-0.44	0.721703	-5.47618	-5.33523	-5.15484	-3.70584	-3.96607	-6.97312	25.2521	25.1102	25.4439	25.8862	25.0874	24.7922
Arhgap21	Q6DFV3	Arhgap21	Q6DFV3;B7ZCJ0;B7ZCJ1;A0A0A0MQE8;G3UWM5	1.39	0.0267239	-1.78676	-0.801063	-1.70838	-3.21762	-2.5358	-2.70267	29.5141	30.2719	29.6233	28.619	28.6443	28.682
Arhgap23	B1AQY2	Arhgap23	B1AQY2;Q69ZH9;F8VQ11;D6RDB5	0.771	0.0765333	-0.231216	-0.463619	-0.324183	-0.588399	-1.35241	-1.3913	30.9582	30.3789	30.5411	30.3465	29.7598	29.4908
Arhgap25	Q8BYW1	Arhgap25	Q8BYW1	-2.53	0.00586263	-5.9386	-6.76096	-7.46592	-3.91842	-4.40488	-4.2454	23.5302	23.9858	23.7699	26.0232	25.4475	25.5742
Arhgap26	F6T836	Arhgap26	F6T836;E9QAQ3;Q6ZQ82	-0.0275	0.937641	-0.399309	0.197965	-0.263646	-0.349974	-0.153119	0.12047	30.0753	29.8829	30.2868	29.5454	29.8062	29.812
Arhgap31	A6X8Z5	Arhgap31	A6X8Z5	-1.36	0.011138	-4.63468	-5.177	-4.32961	-3.37406	-3.25652	-3.44422	26.4243	25.5585	26.3591	27.4516	27.4799	27.2593
Arhgap32	Q811P8	Arhgap32;Arhgap30	Q811P8	-0.919	0.107913	-1.46259	-2.41119	-1.0783	-0.509805	-0.886195	-0.798155	29.9323	30.1605	30.2563	30.2214	30.1452	30.3632
Arhgap33	A0A140LHW2	Arhgap33	A0A140LHW2;Q80YF9	0.591	0.173993	-1.76258	-2.41895	-2.61824	-2.80554	-3.15895	-2.60906	28.1098	28.2774	28.1197	28.0946	27.3294	27.4919
Arhgap35	Q91YM2	Arhgap35	Q91YM2	0.566	0.0659477	1.62588	1.99952	1.83179	1.22656	1.17829	1.35507	32.9073	32.687	32.7273	32.1634	31.9192	32.0329
Arhgap39	H7BX46	Arhgap39	H7BX46;G3X932;P59281	0.216	0.494701	-0.402272	-0.945141	-0.784154	-1.07716	-0.959578	-0.741477	30.128	29.8845	29.8063	29.8085	29.4026	29.4177
Arhgap44	Q5SSM3	Arhgap44	Q5SSM3;F6T1Y2	0.732	0.0260294	1.12098	1.24685	0.952776	0.324897	0.323841	0.475932	30.7253	30.7449	30.7871	29.7154	29.7028	29.6156
Arhgap5	E9PYT0	Arhgap5	E9PYT0;P97393	-0.0703	0.815396	-1.50213	-1.66694	-1.14129	-1.30104	-1.34148	-1.4568	29.4409	29.3258	29.7586	29.3719	29.2268	29.2114
Arhgdia	Q99PT1	Arhgdia	Q99PT1	0.483	0.219443	6.56328	7.22774	6.78432	6.00592	6.56906	6.55127	34.2971	35.1471	34.5778	33.8406	34.1316	34.1005
Arhgdib	Q61599	Arhgdib	Q61599	1.55	0.0116354	0.855189	0.775114	0.258354	-1.39702	-0.85659	-0.517034	28.8603	28.9386	28.6577	26.7806	26.8926	27.2754
Arhgef1	F6ZN61	Arhgef1	F6ZN61;E9PUF7;Q61210	0.15	0.892976	-3.8672	-6.76697	-5.3722	-5.08433	-5.10695	-6.26641	25.5166	23.4865	25.232	24.5466	24.4906	24.7011
Arhgef11	Q68FM7	Arhgef11	Q68FM7;E9Q0A3	-0.413	0.396587	-0.848647	0.127481	-0.269023	0.475482	0.136065	-0.363927	30.7547	30.9745	30.9989	30.4433	30.5534	30.679
Arhgef12	F8VQN6	Arhgef12	F8VQN6;Q8R4H2	-0.0323	0.899051	-0.514834	-0.708867	-0.643621	-0.688726	-0.47613	-0.605427	30.5074	30.0022	30.4674	30.3131	30.0334	29.9931
Arhgef17	Q80U35	Arhgef17	Q80U35	-2.09	0.00397457	-4.73755	-5.29126	-5.64906	-3.2615	-2.79133	-3.35698	26.8744	26.7685	26.6807	27.6295	27.9738	27.2114
Arhgef18	Q6P9R4	Arhgef18	Q6P9R4	-3.64	0.0129131	-7.48187	-7.8095	-9.99916	-5.57588	-4.47266	-4.32081	23.7738	24.1588	22.1224	25.8997	24.1883	26.1913
Arhgef2	H3BJU7	Arhgef2	H3BJU7;H3BJX8;H3BJ45;H3BJ40;H3BKH9;Q60875	-0.472	0.166867	0.624532	0.212841	0.454142	0.944367	0.600269	1.16296	30.9653	30.885	30.9085	31.1751	30.9928	31.16
Arhgef26	D3YYY8	Arhgef26	D3YYY8;F6TAL7	0.985	0.601929	-3.0839	-7.62954	-4.39806	-4.64404	-7.75103	-5.67221	26.9901	24.1022	26.7345	25.179	24.2232	23.6451
Arhgef5	S4R1F1	Arhgef5	S4R1F1;E9Q7D5	0.15	0.785463	-6.229	-5.58947	-6.7979	-5.99048	-6.23844	-6.83825	23.0271	23.77	23.7586	24.053	23.7158	23.0832
Arhgef7	Q9ES28	Arhgef7	Q9ES28;D3Z0V2;A0A0R4J0X8	0.878	0.0143067	2.57104	2.81686	2.59817	1.90921	1.76028	1.68132	32.8686	32.9773	32.8888	31.9779	31.9701	32.0627
Arhgef9	A0A0G2JEU6	Arhgef9;Arhgef4	A0A0G2JEU6;S4R1K5;B1AXI2;A0A0G2JE35;A0A0G2JEH1;B1AXI4;B1AXI6;Q3UTH8;A0A0G2JEU0;A0A0G2JFA1	-0.868	0.196362	-0.122195	-1.80826	-1.44315	-0.482094	0.0129349	-0.301568	27.5717	26.8896	27.4079	27.9527	27.7529	27.2831
Arid1a	E9QAQ7	Arid1a	E9QAQ7;A2BH40	-3	0.0483323	-6.35007	-3.17705	-3.06564	-0.855205	-1.17425	-1.56737	23.963	28.9602	28.2537	29.7605	29.4287	29.203
Arid1b	E9Q6R4	Arid1b	E9Q6R4;E9Q4N7;A0A338P6U8;E9Q4N6	-3.96	0.000199783	-6.59177	-7.13241	-6.83863	-3.24411	-2.75436	-2.6756	23.8802	24.7603	24.2296	27.9044	27.5951	27.8389
Arid2	E9Q7E2	Arid2	E9Q7E2	-1.49	0.122732	-5.98413	-6.1659	-8.03846	-4.50705	-5.74315	-5.47277	24.132	23.9908	23.7856	25.9279	25.0537	25.1725
Arid4b	Z4YMH1	Arid4b	Z4YMH1;A2CG63	-0.803	0.49668	-6.88005	-3.91661	-6.91696	-4.96687	-5.45027	-4.88878	23.8604	25.4759	24.0174	24.4752	24.2214	24.4312
Arih1	Q9Z1K5	Arih1	Q9Z1K5;H9KV21	0.365	0.324857	-0.120762	-0.452386	-0.463483	-0.311625	-0.729242	-1.08973	29.1185	28.8796	29.0214	28.5541	28.4985	28.4074
Arih2	Q9Z1K6	Arih2	Q9Z1K6	0.384	0.216894	-0.776238	-1.32042	-0.951349	-1.29001	-1.51465	-1.39523	28.2256	28.0315	28.4756	27.8924	27.9559	27.8191
Arl1	P61211	Arl1	P61211;F8WIB1	-2.47	0.000997721	1.07164	1.69237	1.45446	3.5822	4.05052	3.99507	29.6559	29.3553	29.3174	31.5301	31.5776	31.4469
Arl10	Q9QXJ4	Arl10	Q9QXJ4;D3Z4X7	-5.27	0.000816825	-7.50144	-5.50412	-6.56349	-1.10913	-1.14984	-1.48963	23.3337	23.8011	23.9169	26.7693	26.9364	26.4732
Arl15	Q8BGR6	Arl15	Q8BGR6;B7ZN40	0.679	0.077786	3.16365	2.73532	2.40368	2.11267	2.09458	2.05709	31.1451	30.4219	30.6896	30.1359	29.9064	29.9337
Arl2	Q9D0J4	Arl2	Q9D0J4	0.864	0.0708359	1.40043	1.11689	1.54639	0.502013	0.968211	0.00174276	29.195	28.7595	29.2701	28.6378	28.7544	27.8698
Arl2bp	Q9D385	Arl2bp	Q9D385	-6.21	0.000276395	-6.27643	-5.39076	-6.86547	-0.0836563	0.528835	-0.341238	23.6978	25.0044	24.7252	27.6962	27.7475	27.0281
Arl3	Q9WUL7	Arl3	Q9WUL7;A0A494BAJ6	0.597	0.0417613	4.37365	4.26352	4.16832	3.64304	3.64107	3.73161	32.5475	32.2383	32.3509	31.739	31.6421	31.6842
Arl4c	P61208	Arl4c	P61208	-1.86	0.00952982	-1.18533	-1.97851	-2.35318	-0.273759	0.119225	0.231174	26.5387	26.5547	26.651	27.124	27.2867	27.3668
Arl5a	Q80ZU0	Arl5a	Q80ZU0	0.344	0.605434	-1.66987	-0.731877	-1.41205	-2.54554	-1.16203	-1.13812	26.225	26.8682	26.3212	26.8749	25.9583	25.8862
Arl5b	Q8BLF9	Arl5b;Arl5c	Q8BLF9;Q6NXZ5;Q9D4P0	-1.35	0.498139	-2.58866	-7.6537	-6.7784	-3.49723	-5.78469	-3.68384	NA	NA	NA	NA	NA	NA
Arl6	O88848	Arl6	O88848;D3Z067	-0.427	0.242859	-0.0425357	0.691438	0.535241	0.917905	0.639182	0.908397	28.903	28.604	29.126	28.8256	28.4219	28.8586
Arl6ip1	Q9JKW0	Arl6ip1	Q9JKW0;A0A0U1RPY6	1.26	0.0286471	3.83359	3.58121	4.22377	2.22306	2.45539	3.17571	30.5508	30.1455	31.1353	28.8419	28.9186	28.861
Arl6ip5	Q8R5J9	Arl6ip5	Q8R5J9	0.0105	0.968201	4.78678	4.87328	4.8979	4.99154	4.69482	4.84019	31.9677	31.6676	31.6976	32.135	31.4509	31.5213
Arl8a	Q8VEH3	Arl8a	Q8VEH3;F6QKK2	-0.0594	0.880463	3.36088	2.9371	2.73166	3.46253	2.84902	2.89633	31.6456	30.3755	30.5549	31.5122	30.8061	30.259
Arl8b	Q9CQW2	Arl8b	Q9CQW2;A0A0N4SVB8	-1.48	0.00842553	1.91526	2.14047	2.06456	3.02266	3.81838	3.71086	30.8136	30.4192	30.3112	31.2151	31.1294	31.6321
Armc1	Q9D7A8	Armc1	Q9D7A8	-0.363	0.358957	2.19904	1.61016	2.54739	2.54095	2.53587	2.36813	30.5788	30.2797	30.4667	30.5155	30.2321	30.2653
Armc10	Q9D0L7	Armc10	Q9D0L7;D3Z5T2	-0.00915	0.974814	2.23016	2.19565	2.18053	1.94437	2.33333	2.35609	30.3198	30.2357	30.0946	30.5016	30.6217	30.3246
Armc4	B2RY50	Armc4	B2RY50	2.02	0.0123101	-4.36441	-4.19566	-4.48583	-6.61842	-5.50169	-6.97982	26.2676	26.2105	26.0128	24.3678	24.7551	24.4082
Armc6	Q8BNU0	Armc6	Q8BNU0	0.65	0.0983232	2.81648	3.62641	3.17035	2.45621	2.62085	2.58556	31.9708	32.6116	32.3389	31.3898	31.4286	31.3528
Armc8	G3X920	Armc8	G3X920;Q9DBR3	-0.583	0.069939	0.199659	0.0675317	0.214119	0.944294	0.488388	0.79741	30.3816	30.4007	30.3503	30.5673	30.2376	30.2135
Armcx2	Q6A058	Armcx2	Q6A058	-1.61	0.088496	-6.2222	-6.02441	-4.34864	-3.17574	-4.55124	-4.02497	23.8909	23.9907	25.2229	23.7863	25.2201	25.3203
Armcx3	Q8BHS6	Armcx3	Q8BHS6	-0.893	0.0170091	0.534144	0.228154	0.198038	1.35854	1.08689	1.19475	29.724	29.4343	29.2841	30.0346	29.8224	29.9837
Armcx4	E9PWM3	Armcx4	E9PWM3	-2.41	0.0147092	-6.97123	-5.24855	-6.86178	-3.92592	-4.29621	-3.64009	25.8562	23.9067	25.8361	27.5715	26.2396	26.3837
Armh3	Q6PD19	Armh3	Q6PD19	-0.276	0.457901	0.215086	-0.367251	0.496646	0.381938	0.367226	0.423407	30.1439	29.9885	29.7149	29.7202	29.2203	29.4592
Armt1	A6H630	Armt1	A6H630	1.84	0.0720697	-1.96241	-1.78445	-1.52398	-3.16182	-5.06296	-2.57904	27.0153	26.8976	26.8731	26.3075	24.1359	28.1664
Arnt	F7C9F6	Arnt	F7C9F6	-6.18	0.000659518	-7.42479	-6.7028	-7.43727	-1.7509	0.206831	-1.47312	23.4628	24.0306	24.3928	25.8332	27.7016	25.9889
Arnt2	Q61324	Arnt2	Q61324	-4.15	0.000782749	-5.93743	-6.9574	-6.48217	-2.95319	-2.09545	-1.88636	23.7704	24.6157	23.9988	26.8886	27.1476	27.5241
Arpc1a	Q9R0Q6	Arpc1a;Arpc1b	Q9R0Q6;A0A0G2JF52	-0.221	0.472528	4.67508	4.94181	4.44946	4.72493	4.90999	5.09329	33.9675	33.7698	33.5069	33.8089	33.6692	33.9808
Arpc1b	Q91Z25	Arpc1b	Q91Z25;Q9WV32	-2.52	0.19269	-7.80217	-2.91473	-2.95766	-1.90598	-2.1042	-2.10454	23.9924	25.9213	26.0316	26.6996	26.6921	26.3838
Arpc2	Q9CVB6	Arpc2	Q9CVB6;D3YXG6	-0.0489	0.844425	5.22733	5.14803	5.08889	5.11615	5.18389	5.31101	34.4153	34.238	34.3178	33.7951	33.7842	33.9006
Arpc3	Q9JM76	Arpc3	Q9JM76;H7BWZ3;D3Z2F7;D3Z2F8;A0A0G2JFK7	-0.239	0.644251	4.21153	5.08339	5.48179	5.40078	4.92543	5.16774	32.7544	33.0885	33.4924	32.8583	32.6718	32.864
Arpc4	P59999	Arpc4	P59999	-0.0214	0.959483	5.57623	5.91796	6.04404	5.8366	6.33925	5.42669	33.4734	33.9431	33.8659	33.5909	33.6247	33.3048
Arpc5	Q9CPW4	Arpc5	Q9CPW4;Q3UA72	-0.535	0.126999	3.96558	4.00823	3.45219	4.19268	4.31304	4.52676	31.9302	31.9377	31.5766	32.0585	32.2285	32.232
Arpc5l	Q9D898	Arpc5l	Q9D898	0.0828	0.879185	2.03738	3.08198	2.32915	1.84678	2.6496	2.70364	30.2077	30.1966	30.1255	30.2068	30.3229	30.4298
Arpin	Q9D0A3	Arpin	Q9D0A3	-0.15	0.931557	-3.47201	-4.86899	-3.16875	-6.45176	-1.98647	-2.62148	23.7696	23.9028	24.2621	23.5728	25.7608	24.1096
Arpp19	P56212	Arpp19	P56212;E9Q827;E9Q4B9	0.427	0.469118	1.40104	0.714306	1.25709	0.0409478	0.558637	1.49204	28.4942	28.4536	28.9603	27.663	28.0344	28.2381
Arpp21	Q9DCB4	Arpp21	Q9DCB4;E9Q4A0;E0CYU3;E0CZ08	-0.444	0.501684	-1.16079	-0.855653	-1.63724	-1.74595	-0.399155	-0.175455	28.2724	27.9752	27.6663	27.2109	28.532	28.4284
Arr3	Q9EQP6	Arr3	Q9EQP6	1.17	0.147245	-3.7222	-3.04681	-3.18749	-3.53017	-5.61003	-4.34111	25.1365	25.529	25.5416	24.8626	23.3158	24.1628
Arrb1	Q8BWG8	Arrb1;Sag	Q8BWG8;J3QNU6	0.489	0.0765333	3.29071	3.21905	3.44777	2.79751	2.81111	2.88272	32.0551	32.3873	32.4562	31.5242	31.9339	32.0094
Arrb2	Q91YI4	Arrb2	Q91YI4;Q5F2D9	-2.54	0.171875	-7.45656	-3.00836	-3.09361	-1.37356	-1.657	-2.90903	23.9476	26.2803	26.2663	27.0513	27.4909	25.9728
Arsa	P50428	Arsa	P50428	-6.12	0.0081985	-2.7693	-7.04504	-6.34673	0.864905	0.694812	0.641567	26.9479	24.393	24.2955	28.7763	29.1909	29.0095
Arsb	A0A0R4J138	Arsb	A0A0R4J138;P50429	-4.9	0.0373392	-3.03025	-1.22089	-6.84302	1.00696	1.38399	1.20809	27.6978	23.9654	23.8466	30.4272	30.6344	29.7501
Arvcf	P98203	Arvcf	P98203	-0.086	0.871756	-1.09364	-0.0284757	-0.705877	-1.0327	-0.329283	-0.208143	29.805	29.8765	29.8302	29.3769	29.4421	29.6763
Arxes2	C0HK80	Arxes2;Arxes1	C0HK80;C0HK79	-2.63	0.00978319	0.339393	-1.41057	-1.31655	1.96528	1.80727	1.73119	28.448	27.4192	27.5592	29.9205	29.5215	29.2086
Asah1	Q9WV54	Asah1	Q9WV54	-4.08	0.000173656	-2.49683	-3.0388	-2.65072	1.06728	1.39718	1.58434	26.6902	25.4083	26.1072	30.4382	30.5661	30.3393
Asap1	H3BL41	Asap1	H3BL41;H3BJY2;E9QN63;Q9QWY8;E9QMJ1;H3BKE6;E9QMI7;H3BKD4	-0.0352	0.929358	-0.697998	-0.131563	-0.7684	-0.875533	-0.334777	-0.281902	29.9937	29.9766	30.2262	29.8122	29.9191	29.8677
Asap2	E9PX52	Asap2	E9PX52	1.05	0.38208	-3.9497	-5.39961	-7.36948	-6.18598	-7.1542	-6.54096	26.2548	25.0305	23.4291	23.2553	24.1334	23.6922
Asap2.1	D3YX85	Asap2;Gm21863	D3YX85;Q7SIG6	-2.18	0.139744	-3.90764	-7.38826	-6.25546	-4.89286	-3.24935	-2.85696	27.1632	23.9478	24.3778	25.9447	26.4924	26.5515
Asb6	Q91ZU1	Asb6	Q91ZU1	-0.71	0.292258	-5.77703	-5.73587	-7.38473	-5.73703	-5.51891	-5.5115	23.5559	24.1854	24.2078	23.3636	23.4924	23.4961
Ascc1	Q9D8Z1	Ascc1	Q9D8Z1	-2	0.0621026	-5.96726	-5.586	-7.32355	-3.16126	-5.05613	-4.66957	NA	NA	NA	NA	NA	NA
Ascc2	Q91WR3	Ascc2	Q91WR3	-1.12	0.0712144	-3.18746	-2.32879	-3.78733	-1.89237	-1.90575	-2.1464	27.1625	27.0818	23.8057	27.0467	27.1882	26.6071
Ascc3	E9PZJ8	Ascc3	E9PZJ8	0.22	0.78628	-2.85691	-4.73518	-4.8938	-4.11751	-4.42255	-4.60637	27.4518	27.263	27.0697	28.2539	26.7987	27.5503
Ash2l	E9PU93	Ash2l	E9PU93;Q91X20;D3YYA0	-4.6	0.00122887	-7.97692	-6.01556	-6.95016	-2.48053	-2.22516	-2.42841	23.4343	23.4342	23.3387	26.9499	27.0303	27.0096
Asic1	Q6NXK8	Asic1	Q6NXK8	-5.23	0.0244631	-2.27499	-6.53245	-7.26752	-0.135789	-0.0601238	-0.177302	26.9997	23.4726	23.6018	28.8251	28.6121	28.383
Asic2	Q925H0	Asic2	Q925H0	-3.39	0.000151386	-6.62455	-6.40347	-6.27157	-2.90333	-3.04376	-3.176	24.1652	23.7333	24.6403	25.8051	25.5694	25.8021
Asl	Q91YI0	Asl	Q91YI0;E0CY49	-0.217	0.679939	1.19222	0.677362	0.180824	1.47027	0.554848	0.676994	30.27	30.1306	30.1989	30.1258	30.0104	29.9564
Asna1	O54984	Asna1	O54984	-0.372	0.147498	2.96436	2.80551	3.01603	3.29024	3.257	3.35398	31.7474	31.4351	31.6501	31.7135	31.4876	31.5401
Asns	Q61024	Asns	Q61024	-0.491	0.0874406	2.45604	2.37679	2.47668	3.12398	2.83615	2.8224	32.1403	31.8434	31.8882	32.362	32.1639	32.005
Asph	A2AL79	Asph	A2AL79;Q6P8S1;A2AL71;A2AL83;A2AL78;Q3TU40;A2AL81	-7.19	8.06031e-05	-5.61241	-6.58367	-6.33859	0.741579	1.27917	1.01175	23.6166	23.6729	24.4826	27.4067	27.1541	26.7234
Asph.1	A2AL85	Asph	A2AL85;Q8BSY0;Q8CBM2	-3.36	0.000505331	-6.71658	-6.25091	-7.03091	-2.97496	-3.38426	-3.55699	NA	NA	NA	NA	NA	NA
Asphd2	Q80VP9	Asphd2	Q80VP9	-0.19	0.675448	-0.514137	-0.00170023	0.414518	0.342964	0.384535	-0.257504	28.672	28.4785	29.1564	28.7329	28.591	28.4189
Aspscr1	Q8VBT9	Aspscr1	Q8VBT9;A2AC05;A2ABZ8	-0.996	0.569175	0.236783	-0.747304	2.79285	3.10661	-0.38725	2.5515	31.5042	31.3812	32.0921	31.264	30.7778	30.5225
Asrgl1	Q8C0M9	Asrgl1	Q8C0M9	0.446	0.349782	1.02923	0.697901	1.42342	1.19633	0.339262	0.276636	29.8509	29.3527	29.8261	29.5925	29.1772	29.117
Ass1	P16460	Ass1	P16460	-0.454	0.282156	-0.997753	-1.88962	-1.00108	-0.909931	-0.912938	-0.702248	28.0796	27.7032	27.9559	27.7636	28.2752	27.9537
Astn1	Q61137	Astn1	Q61137;A0A0A6YWE6;Q3TPU9;A0A0A6YXJ4	-0.547	0.100051	1.22232	1.58356	1.20249	1.65565	1.92609	2.06799	31.844	31.5745	31.8513	31.8618	31.8163	31.9376
Astn2	Q80Z10	Astn2	Q80Z10	-2.09	0.00464285	-6.34527	-5.94533	-5.64074	-3.65434	-4.42536	-3.5938	24.7259	25.2959	24.0388	26.5853	26.2574	26.5294
Asz1	Q8VD46	Asz1	Q8VD46	-1.94	0.307831	-5.45625	-3.75619	-6.25636	-6.13773	-1.82098	-1.69013	25.4617	25.5523	23.7582	24.4072	27.118	27.1671
Atad1	Q9D5T0	Atad1	Q9D5T0;A0A494B9Y0;A0A494B9L7;A0A494BAB5	-1.15	0.0085307	1.34203	1.44784	0.941101	2.43807	2.33732	2.39865	30.5226	30.717	29.8456	31.212	31.1128	31.0515
Atad3	Q925I1	Atad3;Atad3a	Q925I1	-0.984	0.016012	0.917384	1.44017	1.3314	2.29953	2.12815	2.21365	31.0721	31.3489	31.3705	31.6582	31.4289	31.5544
Atat1	Q8K341	Atat1	Q8K341	1.07	0.00747043	4.21332	4.42779	4.05297	3.15886	3.16825	3.16217	33.6564	33.4431	33.561	32.5072	32.2943	32.2392
Atcay	Q8BHE3	Atcay	Q8BHE3	0.322	0.471724	2.10496	2.52659	1.76755	1.81821	1.37198	2.24377	30.9383	31.0096	30.4872	30.6631	30.2774	30.6915
Ate1	Q4FCQ7	Ate1	Q4FCQ7;A0A1L1SQ41;Q9Z2A5;J3QNU1	-0.173	0.492118	-0.722348	-0.751232	-0.778766	-0.400119	-0.641311	-0.690584	28.5139	28.7158	28.0594	28.0431	28.0137	28.0679
Atf1	P81269	Atf1;Crem	P81269;E9PZ49;E9PZB1;D3Z7P7;D3Z326;F6VJ22;D3Z6A5;F6QWT6;E9PWM8;F6U9F5;F6Q346;F6W4F5;E9PWV9;D3Z7M6;F6QKL8;D3Z2U7	2.49	0.413438	0.697783	2.75378	1.05747	1.52043	1.63832	-6.13427	28.1056	30.1231	28.2206	28.4003	28.4146	24.7479
Atf2	A2AQF0	Atf2;Atf7;Gm28047	A2AQF0;G3UXC3;P16951;A2AQE9	-5.93	0.000131682	-6.3629	-7.0412	-7.4995	-0.984202	-0.900037	-1.22609	24.25	24.0728	23.8156	26.2156	26.8737	26.2749
Atf7ip	A0A087WR75	Atf7ip	A0A087WR75;Q7TT18;A0A0N4SVP5;A0A087WR39	-3.4	0.0109611	-6.95178	-6.60708	-7.27219	-2.12108	-4.70361	-3.81366	NA	NA	NA	NA	NA	NA
Atg101	Q9D8Z6	Atg101	Q9D8Z6	-1.43	0.306719	-3.58359	-1.74312	0.263157	0.626399	-0.664059	-0.736717	27.2469	27.7491	28.3619	27.3275	27.1857	27.2222
Atg12	Q9CQY1	Atg12	Q9CQY1	3.65	0.181866	1.3165	-0.291012	-0.806898	0.817688	-5.959	-5.59228	27.8238	26.5264	25.7684	26.0282	24.0988	24.5658
Atg13	Q91YI1	Atg13	Q91YI1	-2.03	0.234669	-2.37731	-6.87614	-2.71644	-1.93494	-2.11	-1.83546	27.3579	24.1827	26.9636	26.6174	26.644	26.7464
Atg16l1	Q8C0J2	Atg16l1	Q8C0J2	0.478	0.283645	-1.02252	-1.63218	-0.587025	-1.31276	-1.73175	-1.63024	28.2056	28.8276	28.1644	28.1737	28.3901	28.3475
Atg2a	Q6P4T0	Atg2a	Q6P4T0;F6V3Y9	1.16	0.119961	-3.80306	-3.11028	-4.67005	-4.77337	-5.7209	-4.58326	27.2864	26.524	27.0994	26.4039	26.4185	26.6938
Atg2b.1	Q80XK6	Atg2b	Q80XK6	0.199	0.55777	-2.24392	-2.11736	-2.59015	-2.20411	-2.77469	-2.571	29.2518	28.8424	29.137	29.0635	28.5927	28.714
Atg3	Q9CPX6	Atg3	Q9CPX6	0.637	0.051217	1.60641	1.23674	1.22425	0.62483	0.786344	0.744075	30.3265	28.7836	29.298	28.8881	28.4361	28.0971
Atg4b	A0A0R4J065	Atg4b	A0A0R4J065;Q8BGE6;A0A087WNY2;A0A087WRT0	-0.0293	0.942491	-0.343941	0.0233862	0.518586	0.219476	-0.183108	0.249425	28.8635	28.622	28.9431	29.3154	28.6467	28.7489
Atg4c	Q811C2	Atg4c	Q811C2	-0.426	0.636894	-4.48961	-5.50693	-7.04215	-5.06119	-5.5151	-5.18356	24.2631	24.6241	24.319	24.3905	24.1189	24.2684
Atg5	Q99J83	Atg5	Q99J83	0.367	0.287094	0.798295	1.04344	1.37504	0.613889	0.516636	0.985905	29.3898	29.17	29.9272	29.2512	28.9271	29.1059
Atg7	A0A0A0MQN4	Atg7	A0A0A0MQN4;Q9D906;S4R2T5;S4R2D5	0.437	0.138593	0.201018	0.359197	-0.0947224	-0.325584	-0.291851	-0.226903	30.1878	30.258	30.1758	29.8281	29.7116	29.7132
Atg9a	Q3ZAQ4	Atg9a	Q3ZAQ4;A0A087WP33;Q68FE2	0.0952	0.711902	0.0712201	-0.0685081	-0.0858056	0.00296861	-0.284758	-0.0869601	30.0334	29.5243	30.3029	29.6023	29.5544	29.6612
Atic	Q9CWJ9	Atic	Q9CWJ9	0.357	0.164249	2.77137	2.58342	2.73135	2.33946	2.25644	2.42006	32.4737	32.3996	32.5316	32.2115	31.9216	32.0024
Atl1	Q8BH66	Atl1	Q8BH66	0.0841	0.826607	3.01111	3.49872	3.9022	3.37855	3.45665	3.3245	32.9765	33.0112	33.3971	32.6665	32.7238	32.7998
Atl2	Q6PA06	Atl2	Q6PA06;E9QND8	-0.112	0.700365	1.44375	1.47568	1.78207	1.50481	1.65451	1.87966	30.7272	30.8919	31.375	31.0089	30.7972	31.0062
Atl3	E9PYT3	Atl3	E9PYT3;Q91YH5	0.806	0.42448	-1.84181	-1.34867	0.840033	-1.57365	-1.19324	-2.00083	28.3395	28.4244	28.4541	28.1437	28.8917	28.3625
Atm	B9EHX4	Atm	B9EHX4;Q62388	-1.76	0.0714353	-7.04058	-6.86499	-6.19467	-3.99905	-4.56811	-6.24587	23.9479	26.1222	26.6713	27.4156	26.652	26.2074
Atn1	O35126	Atn1	O35126	-2.39	0.0370215	-6.4442	-7.40972	-4.89709	-4.14481	-3.27123	-4.16286	23.3677	23.9073	24.1151	25.9666	25.9632	25.8373
Atox1	O08997	Atox1	O08997	0.22	0.600071	3.69607	4.70459	4.15078	3.80157	4.09047	4.00084	30.2256	31.0492	30.875	30.2054	30.8265	30.8173
Atp11b	A0A0G2JE89	Atp11b;Atp11a	A0A0G2JE89;Q6DFW5	-1.11	0.0539684	-3.22964	-3.40572	-2.73391	-2.6528	-1.67426	-1.71492	27.0472	26.5882	27.4133	27.3908	27.7765	27.809
Atp11c	E9QKK8	Atp11c	E9QKK8;F6Q8D3;Q9QZW0	-2.1	0.134719	-3.98884	-6.78495	-3.16649	-2.45697	-2.11899	-3.07599	26.4129	23.4733	28.1798	27.6366	27.0145	26.6978
Atp12a	Q9Z1W8	Atp12a	Q9Z1W8	2.11	0.203159	-2.63253	-0.783773	-3.6465	-2.27312	-5.22639	-5.89491	27.8677	28.2873	27.2959	27.8473	23.9609	24.3428
Atp13a1	Q9EPE9	Atp13a1	Q9EPE9	-2.43	0.00724469	-1.24677	-2.15956	-2.21756	0.294978	1.25278	0.111936	29.9463	28.7081	29.1929	30.9339	30.7809	30.5986
Atp1a1	Q8VDN2	Atp1a1;Atp4a	Q8VDN2	0.174	0.548424	4.52348	4.89691	4.42182	4.35244	4.54323	4.42371	34.7312	34.9432	34.5063	34.4815	34.6135	34.5993
Atp1a2	D3YYN7	Atp1a2	D3YYN7;Q6PIE5	-3.46	0.0831689	-1.72496	-6.43374	-6.19392	-1.51842	-1.54353	-0.905773	27.7184	23.4183	24.0907	28.608	28.9691	28.9647
Atp1a3	A0A0G2JGX4	Atp1a3	A0A0G2JGX4;Q6PIC6;Q8VCE0	0.293	0.348201	6.31758	6.83146	6.52674	6.06345	6.30908	6.42418	36.6216	36.9197	36.7537	36.1289	36.2885	36.3709
Atp1a4	Q9WV27	Atp1a4	Q9WV27	-0.0202	0.985429	-5.63891	-4.324	-4.56366	-4.27014	-3.68583	-6.50994	25.3337	25.8497	25.8034	25.9015	26.149	23.5158
Atp1b1	P14094	Atp1b1	P14094	0.177	0.490067	7.0938	6.8886	6.98307	6.96404	6.69543	6.77497	35.3991	35.08	35.0304	34.9028	34.9449	35.0111
Atp1b2	P14231	Atp1b2	P14231	-0.699	0.173292	1.41884	1.34231	1.03825	1.24325	2.37923	2.27478	30.0877	30.027	29.7672	29.8147	30.1411	30.0346
Atp1b3	P97370	Atp1b3	P97370	0.439	0.402033	2.63442	1.5984	1.5698	1.90509	1.39272	1.18837	31.0449	30.0099	30.2027	30.4774	30.1041	29.917
Atp2a2	O55143	Atp2a2;Atp2a1;Atp2a3	O55143	-1.05	0.00776591	3.55734	3.4715	3.71528	4.53062	4.57907	4.78727	33.958	33.7356	33.8865	34.4704	34.6616	34.8386
Atp2b1	A0A1W2P772	Atp2b1	A0A1W2P772;A0A1W2P882	-0.557	0.261401	-0.554204	-0.0287465	0.376469	0.270519	1.015	0.179757	28.1711	28.2335	28.3662	28.0882	29.0752	29.0825
Atp2b1.1	G5E829	Atp2b1	G5E829	-0.335	0.191705	3.85772	3.90843	3.78288	4.03676	4.26551	4.2516	33.9424	34.0108	34.0761	34.2149	34.2973	34.4005
Atp2b2	Q3UHH0	Atp2b2	Q3UHH0;F8WHB1;Q9R0K7	0.0978	0.910077	-1.53428	0.30039	0.508723	-0.909997	-0.126596	0.0179064	29.2505	30.3498	30.882	29.3283	30.1092	30.1716
Atp2b2.1	S4R1C4	Atp2b2	S4R1C4	-1.06	0.168371	-5.75723	-7.53968	-5.73903	-5.49094	-5.29753	-5.07572	24.4572	23.6861	23.3334	24.7936	24.8977	25.0867
Atp2b3.1	Q0VF55	Atp2b3	Q0VF55	1	0.0950375	-4.77647	-3.59782	-4.61688	-5.72558	-5.30149	-4.96471	25.9577	26.0254	25.8405	23.7937	25.1823	25.4141
Atp2b4	E9Q828	Atp2b4	E9Q828;F7AAP4	0.305	0.281926	0.833007	1.01965	1.21288	0.550567	0.752646	0.847241	31.1558	31.1292	31.4365	31.1968	31.0522	31.0783
Atp2c1	H3BL44	Atp2c1	H3BL44;Q3UZR5;Q80XR2;H3BIX7;H3BLI6	0.0494	0.926619	-2.62915	-1.7891	-2.70886	-1.97162	-2.95921	-2.34442	27.1666	27.7144	27.5115	27.6581	27.5735	28.0815
Atp5c1	Q8C2Q8	Atp5c1;Atp5f1c	Q8C2Q8;Q91VR2;A2AKU9;A2AKV2;A2AKV3;A2AKV1	-1.31	0.00421648	4.85305	5.00757	4.77881	6.02431	6.14542	6.40662	33.1583	32.7435	32.8873	34.0367	34.0027	34.4612
Atp5f1a	Q03265	Atp5f1a;Atp5a1	Q03265;D3Z6F5	-0.764	0.0179012	6.53029	6.58606	6.6941	7.33138	7.33661	7.43573	36.2325	36.0173	36.1871	36.8608	36.8681	36.849
Atp5f1b	P56480	Atp5f1b	P56480	-0.79	0.0191561	7.00176	6.75511	6.74663	7.67397	7.55124	7.64839	36.2594	36.2727	36.4762	36.9862	36.8846	37.0055
Atp5f1d	Q9D3D9	Atp5f1d;Atp5d	Q9D3D9	-0.813	0.0481489	5.58845	5.63827	5.93361	6.90559	6.46687	6.22808	32.5902	33.0337	32.4405	33.7225	33.4278	32.9811
Atp5f1e	P56382	Atp5f1e	P56382	-2.77	0.00125876	2.72519	2.91143	2.82577	5.12694	6.1631	5.49158	29.5907	29.1753	28.1094	31.2971	32.1837	31.6242
Atp5md	Q78IK2	Atp5md	Q78IK2	-2.74	0.000430705	2.32359	2.08948	2.2773	4.64051	5.09729	5.17911	28.8432	28.258	28.6097	30.9114	31.1218	31.1607
Atp5me	Q06185	Atp5me;Atp5k	Q06185;Q8BTB6	-2.74	0.0163832	2.86879	1.24859	2.34845	3.87041	5.49945	5.32937	29.9839	28.652	29.5388	30.8966	30.8547	30.747
Atp5mf	P56135	Atp5mf;Atp5j2	P56135;F8WHP8	-1.51	0.00466402	4.89238	4.5305	4.96722	6.60386	6.20466	6.11684	31.5848	31.386	31.8202	32.9939	32.5269	32.4229
Atp5mg	Q9CPQ8	Atp5mg	Q9CPQ8	-2.49	0.00822219	2.58054	1.59491	3.32598	4.84919	5.12642	4.99302	29.9624	29.322	30.9345	31.7198	31.7715	31.4018
Atp5mpl	A0A1Y7VLP0	Atp5mpl	A0A1Y7VLP0;P56379	-6.87	0.0242562	-0.0261441	-6.22775	-0.184021	4.71361	4.56155	4.8823	25.675	23.7596	25.4594	30.836	30.6067	30.9113
Atp5pb	Q9CQQ7	Atp5pb;Atp5f1	Q9CQQ7;A0A0G2JGX3	-1.66	0.0103608	3.30208	3.78732	4.28412	5.2344	5.31912	5.78954	32.5112	32.7341	33.2934	33.9001	33.813	34.045
Atp5pd	Q9DCX2	Atp5pd;Atp5h	Q9DCX2;B1ASE2	-0.473	0.126188	5.3624	5.78666	5.83155	6.0789	6.18014	6.14162	33.5896	33.6906	33.8767	34.1068	34.2204	34.1701
Atp5pf	P97450	Atp5pf;Atp5j	P97450;E9QAD6	-1.04	0.0171052	5.03545	4.74848	5.17974	5.73267	6.12819	6.22153	32.1904	31.67	32.1742	32.5277	33.0192	32.9053
Atp5po	Q9DB20	Atp5po;Atp5o	Q9DB20	-1.07	0.0271415	3.86795	4.1454	3.25783	4.8255	4.78489	4.86749	32.1674	32.4705	31.4981	32.847	32.8308	32.7701
Atp6ap1	Q9R1Q9	Atp6ap1	Q9R1Q9;Q3TKX1;B7FAU3	-1.01	0.0130084	0.480906	0.53832	0.939173	1.68661	1.74624	1.56461	29.2765	29.0964	29.5124	30.0436	29.854	29.7939
Atp6ap2	Q9CYN9	Atp6ap2	Q9CYN9	-2.08	0.00060832	0.43237	0.193003	0.377656	2.28391	2.40253	2.54514	29.008	29.1945	29.5324	30.6137	30.7382	30.8327
Atp6v0a1	K3W4T3	Atp6v0a1;Atp6v0a4;Tcirg1	K3W4T3;Q9Z1G4	0.648	0.0306832	5.27927	5.44398	5.29377	4.6892	4.65699	4.72539	35.1044	35.0938	34.9699	34.4039	34.2301	34.2971
Atp6v0a2	P15920	Atp6v0a2	P15920	-4.12	0.000479182	-7.33115	-6.62996	-6.41437	-2.34905	-3.15046	-2.50441	24.1078	23.6067	24.1405	27.2401	26.6294	27.3114
Atp6v0c	E9Q9C5	Atp6v0c	E9Q9C5;P63082	0.542	0.301432	4.21802	4.60902	4.57699	3.15153	4.37211	4.25315	30.4108	30.5461	30.7887	29.3067	30.5532	30.5951
Atp6v0d1	P51863	Atp6v0d1	P51863	0.501	0.0876003	5.55355	5.84686	5.88853	5.18278	5.28422	5.3187	34.1839	34.5496	34.3532	33.8676	33.7382	34.0162
Atp6v1a	P50516	Atp6v1a	P50516	0.719	0.0215365	7.05627	7.19412	7.20837	6.46764	6.38616	6.44843	36.9513	36.8276	36.9421	36.0544	35.8586	35.9404
Atp6v1b2	P62814	Atp6v1b2;Atp6v1b1	P62814	0.624	0.0538607	6.34455	6.75216	6.56708	5.81195	6.00584	5.97494	35.6073	36.0355	35.8159	35.0342	35.1885	35.1263
Atp6v1c1	Q9Z1G3	Atp6v1c1;Atp6v1c2	Q9Z1G3	0.513	0.0782351	4.83455	4.93688	4.63033	4.23522	4.23912	4.38943	34.2713	34.3174	34.0402	33.5601	33.5743	33.6513
Atp6v1d	P57746	Atp6v1d	P57746	-0.171	0.651846	3.72872	4.09409	3.97132	3.63142	4.35978	4.31723	32.4247	32.322	32.5661	31.9555	32.3224	32.207
Atp6v1e1	P50518	Atp6v1e1;Atp6v1e2	P50518;A0A0N4SW07	0.256	0.343098	6.13174	6.50588	6.39616	6.18375	6.01246	6.06936	34.7491	34.896	34.6615	34.3293	34.194	34.0467
Atp6v1f	Q9D1K2	Atp6v1f	Q9D1K2;A0A0N4SVE1;F7B2B4	0.56	0.0939079	5.146	5.09563	5.37093	4.8849	4.67865	4.36781	32.989	32.7311	32.8561	32.4222	32.1677	31.9468
Atp6v1g1	Q9CR51	Atp6v1g1	Q9CR51	0.659	0.0835654	5.74768	6.3932	6.10159	5.20512	5.4636	5.59757	33.1831	33.1722	33.2103	32.4225	32.5358	32.4819
Atp6v1g2	Q9WTT4	Atp6v1g2	Q9WTT4;B0V2H4;G5E923	0.438	0.162377	5.88366	6.19358	5.93294	5.29151	5.71375	5.6904	32.9018	33.919	33.4695	32.5065	33.0118	33.0575
Atp6v1h	A0A0A6YX18	Atp6v1h	A0A0A6YX18;Q8BVE3;A0A0A6YWP6	0.586	0.0467334	5.53546	5.39686	5.66664	4.9306	4.95733	4.95338	34.8789	34.6541	34.8261	34.1963	34.2009	34.1495
Atp7a	A2AG68	Atp7a	A2AG68;Q64430	-1.42	0.124945	-7.7728	-6.11085	-5.61242	-4.57359	-4.97618	-5.67276	23.7846	24.4981	24.8239	26.045	25.0456	23.9143
Atp8a1	P70704	Atp8a1	P70704	3.04	0.00131031	-2.598	-2.83577	-2.98935	-5.26886	-5.83927	-6.43034	27.5664	27.7718	27.3059	26.1143	23.9573	24.3443
Atp8a1.1	A0A0M3HEP7	Atp8a1;Atp8b1;Atp8b4	A0A0M3HEP7	0.0791	0.793131	-3.75437	-3.94047	-3.49253	-3.98899	-3.64418	-3.79148	26.7483	26.2797	26.8145	26.5144	26.6421	26.5521
Atp8a2	P98200	Atp8a2	P98200	0.0433	0.932288	-1.30646	-1.11565	-2.27243	-1.4945	-1.40728	-1.92268	29.4571	28.7634	28.6559	28.5924	28.764	28.4605
Atp9a	A2AQC3	Atp9a;Atp9b	A2AQC3;O70228;Q8C4G3;Q8C288	-0.49	0.132313	0.537274	1.01781	0.945003	1.33745	1.1582	1.47513	31.4898	31.3176	31.3946	31.584	31.4428	31.5779
Atp9b	A0A286YCV0	Atp9b	A0A286YCV0;D3YV00;P98195;A0A286YDR0	-0.0449	0.972285	-4.64307	-7.83517	-5.03724	-5.31644	-6.32491	-5.73939	26.0511	24.7053	25.3125	25.1211	24.6469	23.7996
Atpaf1	H3BJP9	Atpaf1	H3BJP9;V9GX21;H3BLL2;Q811I0;H3BK16	-2.66	0.084582	-4.08992	-6.90917	-3.06405	-1.76205	-2.63198	-1.688	24.7707	24.4235	25.1086	25.8144	25.3477	25.3848
Atpif1	E9PV44	Atpif1;ATP5IF1	E9PV44;O35143	-0.409	0.142267	5.79916	5.69585	5.88557	6.01582	6.34904	6.24345	32.7063	32.5628	32.7155	32.6294	32.4986	32.5107
Atraid	F6RYG0	Atraid	F6RYG0;Q6PGD0;D3YYN2;G3UXG8;D3Z6U7	-4.6	0.0129131	-3.41255	-6.47716	-6.85361	-1.25467	-1.28435	-0.393541	25.2884	23.8654	23.7869	27.2131	25.6702	25.7126
Atrn	Q9WU60	Atrn	Q9WU60	-0.942	0.11422	-2.34071	-2.55625	-1.88372	-2.0859	-0.824368	-1.04456	28.6502	29.1311	28.9044	28.5078	29.0351	28.9492
Atrnl1	Q6A051	Atrnl1	Q6A051	-0.904	0.0330554	-2.94005	-3.47311	-2.9871	-2.02161	-2.17686	-2.49049	27.8831	26.9965	27.7857	28.2546	27.1439	27.5691
Atrx	Q61687	Atrx	Q61687	-5.19	0.00290376	-3.99334	-5.60751	-6.86201	-0.286799	-0.263565	-0.351894	29.3149	24.1654	23.6936	31.5095	30.6601	30.6551
Atxn10	P28658	Atxn10	P28658	-0.603	0.0688756	2.77423	2.84824	2.52381	3.52189	3.32156	3.11093	32.1825	32.1486	32.173	32.7396	32.6292	32.5753
Atxn2.1	E9QM77	Atxn2	E9QM77;O70305;F6U2C2	-3.22	0.000240895	-3.9007	-4.40876	-4.39773	-1.07835	-1.04394	-0.91008	26.7672	25.9589	26.0821	29.0356	28.9274	29.2817
Atxn3	E9Q717	Atxn3	E9Q717;Q5M8S1;Q9CVD2;F6T5L3	1.6	0.280303	-2.74361	-3.5565	-1.87461	-2.81038	-6.62721	-3.54655	26.1545	24.9018	26.336	24.7464	23.6465	24.9962
Atxn7l3b	Q3UD01	Atxn7l3b	Q3UD01	-0.873	0.766237	-5.47582	-6.84348	0.164365	-5.72384	-2.54708	-1.26618	NA	NA	NA	NA	NA	NA
AU040320	Z4YK56	AU040320;Kiaa0319l	Z4YK56;Q8K135	-3.46	0.0373392	-2.09066	-5.00702	-5.93191	-1.12289	-0.746543	-0.788513	23.2046	23.6	23.3709	29.2128	29.0374	29.1181
Auh	A0A0R4J023	Auh	A0A0R4J023;Q9JLZ3;F6RT60;F6R307	-1.77	0.00524869	0.264956	0.212566	-0.393435	1.43554	1.98478	1.97101	29.4938	29.1742	29.1866	30.4771	30.2112	30.3258
Aup1	Q3U3K9	Aup1	Q3U3K9;P70295;A0A0N4SVA6	-1.88	0.00649684	-3.02878	-3.49516	-3.18347	-1.22156	-0.915532	-1.92902	26.8787	26.0904	26.4624	27.6413	26.9814	26.5091
Aurkaip1	Q9DCJ7	Aurkaip1	Q9DCJ7	-3.06	0.071739	-2.94139	-7.10851	-6.14257	-2.86279	-2.04581	-2.11248	25.2613	24.5467	24.3981	25.1839	25.5478	25.7486
Avl9	Q80U56	Avl9	Q80U56	0.975	0.010883	0.327815	0.422492	0.28538	-0.578095	-0.474683	-0.835272	29.9843	29.9208	29.9776	29.4078	29.1054	29.0627
AW146154	Q3TPQ7	AW146154	Q3TPQ7	-2.76	0.00998503	-5.81395	-7.44871	-7.33403	-3.52064	-4.54708	-4.24421	23.346	24.074	24.0868	25.5572	24.5374	25.1344
AW551984	Q8BGF0	AW551984	Q8BGF0	-1.36	0.448339	-3.68853	-4.8008	-7.86678	-3.12095	-3.19737	-5.94459	26.2033	25.5649	23.2075	26.8224	26.2151	25.7098
B2m	P01887	B2m	P01887	2.1	0.0173507	0.0788639	0.465621	1.24187	-0.714001	-1.72208	-2.07656	27.6062	28.2751	28.5819	25.7969	25.6986	25.6604
B3galnt1	Q920V1	B3galnt1	Q920V1	-3.65	0.00458586	-5.58763	-7.70861	-6.0096	-2.85381	-2.63895	-2.86611	23.0004	23.4811	25.0011	26.0092	26.1362	25.7682
B3gat1	A0A0R4J1Z6	B3gat1	A0A0R4J1Z6;Q9CW73	-2.72	0.0624651	-3.87907	-6.65889	-7.09176	-2.38919	-3.76163	-3.31485	24.5919	23.727	23.5796	25.8874	25.4469	25.6262
B3gat3	P58158	B3gat3	P58158	-7.06	9.09978e-05	-6.97785	-5.84828	-6.04512	0.724946	0.763644	0.808115	23.5941	24.4959	24.1474	29.2727	29.2308	29.2399
B3glct	Q8BHT6	B3glct	Q8BHT6	-3.54	0.0039392	-6.03394	-5.57718	-7.08777	-3.49513	-2.22505	-2.36604	23.7788	24.0419	24.1402	26.1612	26.7083	26.5432
B4galnt1	Q09200	B4galnt1	Q09200	-4.37	0.0211235	-2.86621	-6.30629	-6.7452	-0.594161	-0.964156	-1.23736	28.0039	23.0828	24.0839	28.5581	28.0969	28.086
B4galnt4	Q766D5	B4galnt4	Q766D5	-0.476	0.525009	-7.0978	-6.43881	-5.2224	-6.18319	-5.21303	-5.93532	23.0445	23.4069	24.5616	24.0294	24.8329	24.0923
B4gat1	Q8BWP8	B4gat1	Q8BWP8	-4.15	0.0346316	-6.60497	-6.86487	-2.65117	-1.25383	-1.39602	-1.03612	23.9193	23.9875	27.2034	27.5747	27.3438	27.4012
Babam1	Q3UI43	Babam1	Q3UI43	-0.336	0.211826	0.332085	-0.016717	0.125371	0.3959	0.521627	0.530012	29.3154	29.3436	29.3816	29.0546	29.0103	29.1648
Babam2	Q8K3W0	Babam2	Q8K3W0;D3Z7P0	-0.588	0.0867731	1.34617	0.963214	0.891909	1.78224	1.74824	1.43454	30.3297	30.0073	30.0596	30.2701	30.0561	30.2316
Bace1	P56818	Bace1	P56818;F6TV37;Q8C4F4	-0.948	0.084121	-1.96402	-2.31332	-1.90573	-1.32229	-1.59879	-0.416842	26.8888	28.2161	26.9849	27.2393	26.9967	27.8131
Bad	Q3U9H3	Bad	Q3U9H3;Q61337;A0A494BBC4;F7ABX5;D3YZR8	-0.691	0.0312597	-1.10357	-1.37391	-1.24015	-0.583395	-0.434064	-0.628627	27.3738	26.8207	27.1077	27.0597	27.0839	26.8246
Bag1	F6TCF9	Bag1	F6TCF9;A0A1L1SRT0;Q60739	0.461	0.417848	-0.520213	-1.47159	-0.64579	-0.914554	-2.01319	-1.09158	27.8253	27.3959	27.7165	27.8211	27.4925	28.2513
Bag2	Q91YN9	Bag2	Q91YN9	0.25	0.472334	0.82471	0.715535	0.806138	0.0867686	0.698726	0.811051	29.3007	29.1205	29.3162	28.7487	28.91	29.0691
Bag5	Q8CI32	Bag5	Q8CI32	-0.481	0.134117	0.306586	0.172701	-0.231195	0.500153	0.52359	0.666034	29.7378	29.4669	29.3622	29.4111	29.5919	29.5124
Bag6	Q3UF95	Bag6	Q3UF95;Q9Z1R2;G3UYQ2;G3UZT6;A0A1B0GX81	-0.888	0.0267239	0.532222	0.372056	0.176829	0.938282	1.40468	1.4028	30.6486	30.4413	30.3372	30.3833	30.4966	30.6237
Bahd1	Z4YJL0	Bahd1	Z4YJL0;Q497V6	-1.62	0.317808	-5.31744	-6.59987	-5.32831	-5.14301	-5.7429	-1.50307	25.6145	24.0855	24.9015	25.5851	25.2405	27.344
Baiap2	B1AZ46	Baiap2	B1AZ46;Q8BKX1	0.178	0.571015	2.45738	2.47165	2.33771	1.87804	2.41423	2.43916	32.6581	32.2639	31.8752	31.6034	31.8931	31.9087
Banf1	O54962	Banf1	O54962	-0.672	0.0421399	4.51629	4.7289	4.74178	5.54137	5.27428	5.18715	31.9328	32.2848	32.2256	32.2367	32.2482	32.2664
Basp1	Q91XV3	Basp1	Q91XV3	0.563	0.0479489	8.51858	8.41899	8.44301	7.84626	7.8489	7.99607	36.2701	36.2325	35.9447	35.8296	36.2929	36.0691
Bax	A0A1B0GT81	Bax;Gm45808	A0A1B0GT81;Q07813;A0A1B0GTA4;A0A1B0GS13	0.153	0.709994	1.3467	2.29594	2.02104	1.66884	1.89131	1.64575	29.535	30.0076	29.5621	29.2841	29.4356	29.5839
Baz1a	G3UYS9	Baz1a	G3UYS9	-1.94	0.397254	-0.903548	-6.94948	-1.15919	-0.640942	-0.999429	-1.54031	25.4988	24.1641	25.1135	25.5281	25.0803	24.5066
Baz1b	Q9Z277	Baz1b	Q9Z277	-1.92	0.0113155	-6.48372	-5.94816	-6.76692	-3.87468	-4.53325	-5.03765	24.1679	24.6051	23.715	26.6816	26.3723	26.1359
Bbs1	A0A494B9Z5	Bbs1	A0A494B9Z5;Q3V3N7;A0A494B8X5;A0A494B9R9	-0.25	0.442342	-2.23709	-2.81663	-2.21636	-2.23367	-2.10062	-2.18702	27.2277	27.0064	27.2254	26.7334	27.3825	27.1187
BC017158	A0A0R4J0B5	BC017158	A0A0R4J0B5;D6RDS0;Q91W34	-1.27	0.471533	-7.20272	-3.05773	-2.33556	-2.63118	-2.91506	-3.23358	24.1856	26.061	26.5259	26.4061	25.791	25.9037
BC035947	B2RQY6	BC035947	B2RQY6	-2.4	0.0134501	-5.38305	-6.19674	-6.13608	-4.50561	-3.1409	-2.86977	24.8058	24.3629	24.1474	25.1279	25.7656	26.8623
Bcam	Q9R069	Bcam	Q9R069;D3YTK7	0.34	0.740798	-6.38803	-4.99424	-5.37563	-5.48453	-7.39845	-4.89342	23.1821	24.4982	24.3842	24.2778	23.5572	24.5124
Bcan	A0A0A6YW95	Bcan	A0A0A6YW95;Q61361	-2.95	0.157234	-0.542145	-5.77667	-1.11378	-0.323738	0.464304	1.28002	NA	NA	NA	NA	NA	NA
Bcap31	Q61335	Bcap31	Q61335	-1.45	0.0023831	0.846341	1.15833	1.00479	2.36761	2.43257	2.5649	29.8605	29.6846	29.92	30.4822	30.5928	30.7417
Bcar1	Q61140	Bcar1	Q61140	-0.0364	0.934385	-2.14208	-2.67993	-2.67306	-2.1078	-2.99455	-2.28353	28.1421	27.3247	27.8301	27.7866	26.9533	27.4732
Bcas2	Q9D287	Bcas2	Q9D287	-8.14	4.94181e-05	-6.53962	-6.72331	-7.22707	1.06912	1.31577	1.54078	23.4542	24.2482	24.0068	29.3439	29.6837	29.5415
Bcas3	Q0VF62	Bcas3	Q0VF62;B1AR74;Q8CCN5;F7C0F2	1.21	0.00386447	-0.3167	-0.381291	-0.358756	-1.42831	-1.56155	-1.69339	29.4815	29.3809	29.566	28.8493	28.5857	28.1639
Bcat1.2	Q8CBC8	Bcat1	Q8CBC8	-2.79	0.0085307	-6.25612	-6.1653	-7.58165	-4.10471	-4.36587	-3.16245	23.9231	23.3349	24.5426	24.7701	24.5949	25.8438
Bcat2	O35855	Bcat2	O35855;O88374;A0A1B0GX27	-2.73	0.00168286	-2.21511	-3.28875	-2.44	0.096089	-0.0477165	0.186098	27.4656	26.6986	27.1315	28.7147	28.7309	28.8089
Bccip	Q9CWI3	Bccip	Q9CWI3	-5.44	0.000436751	-6.03314	-7.48209	-7.55128	-1.46611	-1.54971	-1.72454	23.3092	24.4957	23.1735	27.1729	27.1803	26.9727
Bckdha	Q3U3J1	Bckdha	Q3U3J1;P50136	-1.51	0.140499	0.712748	-1.92331	0.280057	1.07489	1.29922	1.22363	29.2697	28.3629	29.5713	30.4742	30.7202	30.7253
Bckdhb	Q6P3A8	Bckdhb	Q6P3A8	-1.63	0.00311824	0.402371	-0.0426263	-0.173262	1.55976	1.76562	1.76412	29.2327	28.775	28.8714	30.2437	30.0898	30.0601
Bckdk	A0A0U1RNL7	Bckdk	A0A0U1RNL7;A0A0U1RPT4;O55028;D3Z7R0;A0A0U1RQ97	-2.73	0.00535109	-2.18899	-2.54458	-1.86976	0.0458509	1.43244	0.107715	26.7331	27.0798	27.2111	29.0979	29.5964	29.1688
Bcl2l1	A2AHX9	Bcl2l1	A2AHX9;Q9QWX2;Q64373;A2AHX8	-3.99	0.0603488	-1.06569	-5.44454	-5.72643	-0.156485	-0.896095	0.791194	27.2381	24.3125	24.3418	27.598	27.2282	27.5491
Bcl2l13	P59017	Bcl2l13	P59017	-0.745	0.0497976	1.28828	1.40385	1.59994	1.83148	2.3302	2.36523	30.44	30.0581	30.1223	30.3208	30.4418	30.616
Bcl7a	Q9CXE2	Bcl7a	Q9CXE2	-4.9	0.0001849	-6.18899	-5.49601	-6.47924	-0.938765	-1.29683	-1.21499	23.9421	24.4032	24.3907	26.5513	26.3276	26.2358
Bcl9	Q9D219	Bcl9	Q9D219	-0.19	0.640638	-5.86808	-6.73659	-5.90319	-5.98694	-6.07061	-5.88005	24.5469	25.154	25.0079	24.5744	24.4015	24.5592
Bclaf1	Q8K019	Bclaf1	Q8K019;F8WI22;A0A087WQA0;A0A087WRN1	-9	4.94181e-05	-7.31003	-7.51516	-7.67471	1.81631	1.69012	0.989605	23.3621	23.7485	23.9067	31.6438	29.5203	31.5941
Bcr	Q6PAJ1	Bcr	Q6PAJ1	0.0713	0.825569	-0.839187	-0.858924	-0.502626	-1.09414	-0.575492	-0.745144	30.0237	29.7879	30.0496	29.6453	29.4908	29.3867
Bcs1l	Q9CZP5	Bcs1l	Q9CZP5	-2.08	0.0302359	-1.0999	-3.21333	-1.65617	0.118209	0.025161	0.124176	28.883	26.8523	28.017	29.063	28.8686	28.8913
Bdh1	Q80XN0	Bdh1	Q80XN0;D3Z2Y8	-1.01	0.00980391	4.79812	4.44014	4.46136	5.59354	5.60579	5.52798	33.5555	33.0849	33.5409	34.1397	33.9634	34.0391
Bdnf	H9H9S8	Bdnf	H9H9S8;P21237	0.114	0.770067	-0.555064	-0.120207	-1.01192	-0.690424	-0.813588	-0.525468	28.4326	29.0374	27.84	27.7601	28.2201	27.7451
Becn1	O88597	Becn1	O88597;E9PYD6	0.0789	0.904994	-0.696257	-1.99496	-0.366023	-0.913892	-1.42619	-0.953865	28.1969	28.6046	28.2728	27.7037	27.4052	28.2078
Begain	F8WIG2	Begain	F8WIG2;A0A1B0GT88;Q68EF6	-0.783	0.0463275	-2.75102	-2.60274	-2.52463	-2.15173	-1.48559	-1.89345	27.5458	27.4954	28.0177	27.6572	27.5112	27.8575
Bend7	A2AMN2	Bend7	A2AMN2;Q8BSV3	-2.69	0.0545947	-6.6939	-3.63296	-3.67404	-1.75362	-2.10091	-2.09129	23.2308	25.2235	25.3357	27.1524	26.7158	26.6926
Bgn	P28653	Bgn	P28653	1.38	0.261029	-2.9344	-5.63016	-3.57249	-4.13066	-6.1044	-6.04866	25.8411	24.5066	25.4573	24.4293	24.2278	24.7936
Bhlha9	Q5RJB0	Bhlha9	Q5RJB0	0.352	0.87952	-7.18454	-2.46711	-2.08972	-4.31824	-2.35116	-6.12837	24.0395	25.8481	26.3157	24.2409	26.0885	24.0946
Bicd1	G3UXK5	Bicd1	G3UXK5;B2KG46;Q8BR07	0.588	0.608055	-6.13099	-6.28876	-3.51473	-6.62341	-5.74326	-5.33295	NA	NA	NA	NA	NA	NA
Bicd2	Q921C5	Bicd2;Bicd1	Q921C5;D3Z390	-0.71	0.421591	-4.03201	-6.24051	-6.25372	-4.65002	-4.82645	-4.92118	24.8512	24.2082	25.2408	25.8386	25.5729	25.0395
Bid	P70444	Bid	P70444	0.345	0.705598	0.135181	-0.799953	-0.835131	-2.04501	0.364594	-0.854321	27.6877	27.3541	27.0868	26.2111	27.1781	26.9235
Bin1	O08539	Bin1;Bin2	O08539;Q6P1B9;A0A3Q4EBK4	0.787	0.196561	4.10133	4.90084	4.04352	2.81132	4.10306	3.76943	33.8152	34.0858	33.7191	32.7377	32.9775	32.983
Birc6	S4R1L5	Birc6	S4R1L5;S4R2P8;O88738	-0.482	0.0912093	-0.586082	-0.911791	-0.796775	-0.217557	-0.285535	-0.344413	31.7831	31.5641	31.8233	31.7553	31.5542	31.5469
Bles03	Q8VD62	Bles03	Q8VD62	0.456	0.324263	0.39897	0.825155	0.819361	0.492591	-0.408216	0.591213	29.4661	29.263	29.2504	29.2319	28.7697	29.1337
Blmh	Q8R016	Blmh	Q8R016;E9PY26	0.52	0.0629117	3.5701	3.62594	3.7398	3.20106	3.12784	3.04648	32.7156	32.8058	32.932	32.5779	32.6044	32.6173
Bloc1s1	D3YVM8	Bloc1s1	D3YVM8;O55102;D3Z4L7	-0.692	0.335505	-1.92874	-0.0819344	-1.75764	-0.590669	-0.463992	-0.637904	26.6905	27.2103	26.732	26.8039	26.698	26.5491
Bloc1s2	A0A494BAG7	Bloc1s2	A0A494BAG7;Q9CWG9	0.182	0.674567	1.61785	0.573572	1.25504	0.969797	1.11123	0.819726	29.1237	27.03	27.9697	27.8274	27.6519	27.7692
Blvra	Q9CY64	Blvra	Q9CY64	0.281	0.372128	1.19178	0.719604	1.32053	0.777395	0.738952	0.872133	29.8527	29.827	30.3009	29.4985	29.3791	29.3328
Blvrb	E9PZC3	Blvrb	E9PZC3;Q923D2;E9PZC4	-0.478	0.432764	-1.14689	-2.36666	-0.772432	-0.906507	-1.14367	-0.80294	27.1829	27.0481	26.8088	27.3986	27.0183	26.9914
Bmerb1	Q8R1Y2	Bmerb1	Q8R1Y2;D3Z3S8	-0.304	0.345562	0.24129	0.449808	-0.155181	0.322121	0.599361	0.527312	28.6759	28.3204	28.2754	28.1292	28.5247	28.3991
Bmp1	P98063	Bmp1;Tll2	P98063	-2.45	0.172354	-6.66668	-7.79268	-7.00037	-1.93897	-5.32714	-6.84675	23.5077	25.8579	24.0079	26.6036	26.916	26.5526
Bmpr2	O35607	Bmpr2	O35607	0.501	0.118404	-0.342146	0.167888	-0.277905	-0.580506	-0.701951	-0.67196	30.458	29.6025	29.8419	29.391	29.2536	28.9278
Bnip1	Q6QD59	Bnip1	Q6QD59;B8JJI4;F7C279	-1.64	0.170211	-1.2605	0.722117	-2.6226	0.484037	0.850963	0.426386	28.0213	28.0858	27.6923	28.6869	29.3634	28.6002
Bnip3	A0A1B0GT26	Bnip3	A0A1B0GT26;O55003	-2.19	0.216399	-3.99879	-5.92912	-6.56708	-1.26021	-3.01278	-5.65837	25.3562	23.2493	23.8331	26.0486	25.7312	24.1
Bod1	Q5SQY2	Bod1	Q5SQY2	-3.89	0.000372889	-6.73931	-7.34413	-6.83817	-2.65746	-3.09382	-3.50293	24.1027	23.9958	23.9289	24.4443	24.794	24.6986
Bola1	Q9D8S9	Bola1	Q9D8S9	0.0181	0.973883	1.81481	1.995	1.97145	2.55523	2.01292	1.15888	29.9602	29.3971	29.529	29.7198	29.6216	29.1043
Bola2	Q8BGS2	Bola2	Q8BGS2	-0.0113	0.983413	2.62765	2.43833	2.09411	2.78987	1.62412	2.7799	29.5824	29.1362	29.0761	29.6063	29.2611	29.3531
Bola3	E9Q705	Bola3	E9Q705;E9PX89;Q8CEI1	1.12	0.683757	-0.89799	-6.74071	-1.66592	-1.19625	-5.54326	-5.937	25.81	24.1812	26.4865	25.8215	24.1294	24.6203
Borcs5	E9Q2W8	Borcs5	E9Q2W8;Q9D920	-0.36	0.460611	-0.473187	-1.53939	-0.425512	-0.306712	-0.417334	-0.63288	28.3153	27.2618	27.8599	28.1427	27.73	27.428
Borcs7	Q9CRC6	Borcs7	Q9CRC6	-0.177	0.819249	0.397934	1.12127	-0.789207	0.622644	0.808386	-0.171494	27.8334	27.9981	26.8401	28.1056	27.573	26.9838
Bpgm	P15327	Bpgm	P15327;D3Z223;D3YUE8	-1.13	0.291418	0.800987	-2.08706	0.311412	1.0251	0.490206	0.90899	29.2687	28.0484	29.0235	28.7958	28.9273	28.5556
Bphl	Q8R164	Bphl	Q8R164	-1.19	0.0538607	-0.757967	-1.53209	-0.110391	0.440719	0.333651	0.395208	28.5894	28.2069	28.522	29.1921	28.847	28.6422
Bpnt1	A0A1B0GRV0	Bpnt1	A0A1B0GRV0	0.943	0.611463	-0.254953	-3.58872	-0.137776	-0.453175	-2.00899	-4.34725	28.656	26.9803	28.8598	28.2712	27.3948	26.0308
Bpnt1.1	Q9Z0S1	Bpnt1	Q9Z0S1;D3Z0E6	0.263	0.665134	-2.90274	-1.62331	-1.3472	-2.19328	-2.10737	-2.36087	26.4622	26.9957	27.3456	26.9384	26.9349	26.6487
Bptf	E9Q6A7	Bptf	E9Q6A7;A2A655;A2A654;A2A653	0.0287	0.975541	-7.73458	-5.63926	-7.30012	-6.94071	-7.60952	-6.20973	NA	NA	NA	NA	NA	NA
Braf	P28028	Braf;Raf1	P28028;F6SZ47	0.376	0.397809	-0.518744	-1.11244	-0.125111	-0.692067	-0.924936	-1.26827	29.4948	28.837	29.5737	29.0995	28.5032	28.201
Brap	Q99MP8	Brap	Q99MP8;A0A0G2JF68	-2.44	0.0344362	-5.25054	-6.54638	-6.55658	-2.8212	-4.96806	-3.23751	25.158	24.1833	23.5548	25.6223	26.0324	26.1803
Brat1	E9QLK3	Brat1	E9QLK3;Q8C3R1	-0.66	0.370346	-5.59037	-6.5523	-4.74758	-4.34496	-5.35284	-5.21099	25.3964	24.2333	24.6538	24.9974	24.7241	24.8331
Brcc3	P46737	Brcc3	P46737	0.269	0.354507	2.94611	2.47595	2.79122	2.59195	2.44987	2.3653	31.699	31.2015	31.5675	31.1364	30.7856	30.7848
Brd1	G5E8P1	Brd1;Brpf3	G5E8P1;E9PZ26;A0A3B2WAM7;A0A3B2WCP8;A0A3B2WD38;A0A3B2WCX7;A0A3B2W3T2;A0A3B2WD39;A0A3B2WAQ0;B2KF05	-0.247	0.892993	-1.61292	-6.01635	-1.3639	-3.24404	-2.86433	-2.14428	NA	NA	NA	NA	NA	NA
Brd3	Q8K2F0	Brd3	Q8K2F0;A2AKA9	-4.5	0.00108873	-7.75947	-6.44935	-5.98975	-2.07654	-2.23193	-2.38363	23.3682	23.3146	23.8541	27.099	27.2682	27.6011
Brd4	Q3UH70	Brd4	Q3UH70;Q9ESU6;B0V2V6;A0A494BAK1;B0V2V8;A0A494BBD0;D6RGP2	-2.81	0.00370111	-6.24547	-6.71297	-5.83144	-2.73881	-3.98317	-3.65071	23.6401	24.2999	24.6798	26.9374	26.5147	26.7961
Brd7	O88665	Brd7	O88665	-0.419	0.84442	-4.73274	-1.62678	-7.36571	-5.56813	-3.39647	-3.50451	25.5403	27.1915	24.5285	24.03	27.5358	25.7169
Brd8	D3YZC8	Brd8	D3YZC8;Q8R3B7;D3YZC7	-4.92	0.00993421	-6.60539	-7.19665	-6.10115	-3.8582	-0.481417	-0.790436	NA	NA	NA	NA	NA	NA
Bri3bp	Q8BXV2	Bri3bp	Q8BXV2	-3.02	0.00611235	0.241702	-0.676172	-0.773047	3.30547	1.70317	2.84919	28.2204	27.0189	27.3459	30.7131	29.982	29.9333
Brinp1	Q920P3	Brinp1	Q920P3	-0.168	0.670527	-0.0601837	-0.0259325	0.754439	0.54644	0.361331	0.265078	30.1185	30.2084	30.4506	30.4711	30.0766	30.3886
Brinp2	Q6DFY8	Brinp2	Q6DFY8	-0.236	0.472756	-0.923772	-1.54885	-0.957823	-0.849567	-0.953194	-0.91952	28.76	28.1899	28.7223	28.3943	28.2685	28.2965
Brix1	Q9DCA5	Brix1	Q9DCA5;E9Q2V8	-3.77	0.0129085	-6.87205	-6.50823	-7.77677	-4.85978	-2.96806	-2.01791	23.1892	23.5818	24.6612	25.6649	25.6062	26.3844
Brk1	Q91VR8	Brk1	Q91VR8	-0.166	0.536876	4.27161	4.22079	4.00362	4.3719	4.15995	4.46203	31.6332	31.5176	31.1975	31.4591	31.2821	31.3303
Brms1l	Q3U1T3	Brms1l	Q3U1T3	-2.52	0.0718732	-3.31152	-6.24928	-6.65009	-2.90152	-2.70797	-3.03004	25.5347	24.8154	24.3131	25.6526	25.7888	25.434
Brox	Q8K2Q7	Brox	Q8K2Q7	0.841	0.041189	2.33843	2.55244	2.10011	1.51982	1.77566	1.17377	31.1583	31.1327	30.969	30.3419	30.4542	30.3021
Brpf1	A0A0N4SUS4	Brpf1	A0A0N4SUS4;B2RRD7;A0A0N4SVG7;E9PXP1;Q80XK2;Q3U109;A0A0N4SUT9	1.04	0.314266	-5.66126	-7.5064	-7.80397	-8.69815	-8.47855	-6.91583	23.8069	24.2094	22.7691	21.6484	21.7136	24.0119
Brsk1	Q5RJI5	Brsk1	Q5RJI5;D3Z5P0	0.442	0.257498	1.4991	2.41542	1.98955	1.58805	1.56634	1.42266	32.2673	32.1382	32.1542	31.3768	31.3713	31.3932
Brsk2	Q69Z98	Brsk2	Q69Z98;G3UXM5;G3UWV4;G3UZ19;G3UYN4	0.539	0.0914343	-0.0872486	0.250243	0.297848	-0.569477	-0.282143	-0.304786	30.1788	30.2985	30.3532	29.4192	29.2951	29.3043
Bscl2	A0A0R4J225	Bscl2	A0A0R4J225;Q9Z2E9;F6US45	-5.78	0.000786255	-6.11729	-6.76587	-8.04311	-1.7764	-1.08872	-0.731165	23.7719	23.3016	23.3492	26.6047	26.8263	27.7912
Bsdc1	Q80Y55	Bsdc1	Q80Y55	-2.75	0.0451227	-5.14991	-3.35008	-6.71916	-2.50579	-2.17251	-2.29461	24.9567	26.4737	23.6665	26.243	26.3037	25.9307
Bsg	K3W4Q8	Bsg	K3W4Q8;P18572;J3QP71	-0.317	0.363701	3.38514	3.43887	3.96116	3.66658	3.93952	4.12984	31.6878	31.7917	32.3425	31.8219	31.9194	32.0346
Bsn	O88737	Bsn	O88737	1.11	0.0106552	1.75669	2.0972	1.75709	0.706766	0.996942	0.577763	34.1037	34.1129	34.006	32.8742	32.8792	32.9025
Btbd10	E9Q6L8	Btbd10	E9Q6L8;D6RDQ7;E9Q6Y9;Q80X66	-3.9	0.139906	-4.82254	-9.50583	-8.87582	-3.20683	-6.84954	-1.44397	20.3006	17.8175	17.7634	16.823	23.3043	27.6299
Btbd11	Q6GQW0	Btbd11	Q6GQW0;E9QJW1	-0.727	0.291872	-5.91112	-5.64513	-5.1214	-4.30523	-5.85621	-4.33436	23.5729	25.0192	25.6963	25.1104	24.7685	25.61
Btbd8	Q3TEG0	Btbd8	Q3TEG0	3.68	0.00964515	-1.27212	-3.68973	-2.85204	-7.05658	-6.15299	-5.64087	28.2456	25.5452	26.5361	23.4604	23.8315	24.1914
Btbd9	A0A494B946	Btbd9	A0A494B946;A0A494B9M3;Q8C726;A0A494B989;A0A494B9R7;A0A494B9Q1	-2.62	0.0256739	-6.29357	-6.01323	-7.37833	-3.71747	-2.93683	-5.15987	22.534	23.626	24.3082	24.7144	25.6558	25.7158
Btf3	Q64152	Btf3	Q64152	-9.41	7.14437e-05	-5.53976	-6.65367	-6.86698	2.93306	3.34458	2.87852	25.6979	23.8656	23.8848	31.7126	29.7957	29.7769
Btf3l4	Q9CQH7	Btf3l4	Q9CQH7	-4.23	8.17679e-05	0.419475	0.472412	0.124287	4.52941	4.64456	4.51735	27.456	26.5529	26.4226	31.7703	32.034	31.9356
Bub3	A0A140LHA2	Bub3	A0A140LHA2;Q9WVA3	-6.48	0.000820533	-2.83412	-5.08207	-3.02655	3.17818	2.6173	2.69968	26.2672	24.2453	25.9452	31.3834	31.2948	31.1446
Bud31	Q6PGH1	Bud31	Q6PGH1	-9.54	0.000142858	-7.97332	-6.51108	-8.58266	1.87862	2.06223	1.62211	23.8396	24.4794	24.1601	29.4557	29.2496	29.4319
Bzw1	A0A087WQS2	Bzw1	A0A087WQS2;Q9CQC6;A0A087WPF9	-1.11	0.00619821	0.998417	1.23816	1.08476	2.26549	2.30548	2.07164	30.8432	30.9987	30.904	31.4265	31.1433	31.4106
Bzw2	Q91VK1	Bzw2	Q91VK1	-0.48	0.0744227	1.36212	1.38864	1.46584	1.87297	1.82026	1.96238	30.7178	30.9475	30.9262	31.0517	30.9845	30.938
C1qa	P98086	C1qa	P98086	4.95	0.0128865	-2.21967	-0.0693436	-0.371995	-7.43217	-6.11929	-3.96221	27.992	27.4646	28.0899	23.2721	23.5264	26.4565
C1qb	P14106	C1qb	P14106	3.21	0.115374	-0.472713	-1.35423	-2.17965	-1.4502	-6.38296	-5.81484	27.2418	26.95	26.9704	26.9749	24.4512	24.7529
C1qbp	Q8R5L1	C1qbp	Q8R5L1;O35658	-1.05	0.0187951	4.57391	5.16064	4.58705	5.97228	5.69611	5.79042	32.9137	33.456	32.9635	34.1364	33.8917	34.0296
C1qc	Q02105	C1qc	Q02105	-0.0434	0.904562	-0.900812	-0.133368	-0.489869	-0.435509	-0.365547	-0.592785	27.9938	28.0705	27.8303	27.5242	27.3796	27.2407
C1ql3	Q9ESN4	C1ql3;C1ql2;C1ql1	Q9ESN4	-2.92	0.199514	-2.50075	-3.44531	-7.71308	-0.175579	-3.67087	-1.06566	26.7502	26.7157	23.2181	27.0956	26.4556	26.5095
C1qtnf4	Q8R066	C1qtnf4	Q8R066	-1.04	0.172814	0.0806647	-0.214036	-1.83037	0.630099	0.159461	0.380244	28.8797	28.104	27.4925	29.2261	29.0421	28.8587
C1sa	Q8CG14	C1sa	Q8CG14	2.41	0.0484499	-3.6592	-6.48926	-5.56451	-8.171	-7.27802	-7.50617	NA	NA	NA	NA	NA	NA
C2cd2l	Q80X80	C2cd2l	Q80X80;Q8CAA2;Q8CFV7	-0.803	0.0853491	-0.126131	0.810212	0.0144643	0.856073	1.12268	1.12825	30.0054	30.3695	30.1472	29.842	30.1459	29.9567
C2cd4cC2CD4	Q5HZI2	C2cd4cC2CD4	Q5HZI2	0.682	0.0409849	0.619172	0.417173	0.804462	0.0702865	-0.149279	-0.126766	29.4573	29.3118	29.5654	28.7272	28.6261	28.6944
C2cd5	A0A0N4SW93	C2cd5	A0A0N4SW93;E9Q026;Q7TPS5	0.155	0.642236	-2.10768	-2.29745	-1.70367	-1.97673	-2.34923	-2.24839	28.5356	28.3392	28.1187	27.6261	27.6022	27.7429
C3	P01027	C3	P01027	5.83	0.000571563	-0.965473	0.719249	0.886248	-5.62567	-5.59141	-5.64604	28.7171	32.3727	32.1792	26.2839	25.1381	25.0798
C530008M17Rik	E9Q5L4	C530008M17Rik;Crad	E9Q5L4;E9Q3Y7;Q5PR69	0.0253	0.938134	0.463316	0.570965	0.0669663	0.0971063	0.500827	0.427318	30.919	31.0501	30.7658	30.3088	30.7119	30.3988
C6.1al	Q7M757	C6.1al	Q7M757	0.311	0.855962	-2.83865	-5.39568	-2.81794	-2.73453	-2.93439	-6.31663	26.1269	23.4732	26.0724	26.0623	25.6635	24.2021
C7	D3YXF5	C7	D3YXF5	2.73	0.00149742	-2.80364	-3.41991	-3.25212	-6.22002	-5.37146	-6.07573	26.7016	26.0634	26.2454	23.6938	24.2688	25.0887
C8b	Q8BH35	C8b	Q8BH35	-0.515	0.703582	-7.01788	-4.18858	-3.6349	-3.47053	-5.00629	-4.82047	23.2315	25.4771	26.184	25.5473	25.2554	25.4084
C9orf72	Q6DFW0	C9orf72	Q6DFW0;A2ANZ2	0.379	0.702627	-1.37556	-1.08909	-3.66144	-2.79676	-2.21801	-2.24717	27.4297	27.8345	27.0127	26.2498	26.5409	26.7708
Cab39	Q06138	Cab39	Q06138	0.33	0.208766	2.88553	3.08623	2.83998	2.72628	2.58476	2.50961	32.1419	31.6634	32.0347	31.7591	31.3788	31.4783
Cab39l	Q9DB16	Cab39l	Q9DB16	4.84	0.000484931	-2.61306	-1.21053	-1.68494	-6.8145	-6.92396	-6.30106	26.3938	27.7777	26.9839	22.9355	23.7811	24.9354
Cables2	Q8K3M5	Cables2	Q8K3M5	-0.544	0.471189	-4.96395	-5.68128	-6.86209	-5.47132	-5.68766	-4.71542	24.1588	24.298	23.9643	23.506	23.4046	23.823
Cacna1a	E9Q1R5	Cacna1a	E9Q1R5;P97445;A0A1L1SQZ2	1.15	0.0159955	-3.08792	-2.60416	-3.07544	-3.97011	-3.85284	-4.39789	27.9937	28.6624	27.9979	27.2539	27.4832	27.0622
Cacna1b	A2AIR9	Cacna1b	A2AIR9;A2AIR7;O55017;A2AIS0	1.53	0.00978319	-0.630265	-1.14636	-0.821626	-1.93105	-2.46907	-2.7753	30.3901	30.0073	30.3586	29.6148	29.089	28.8678
Cacna1c	A0A1W2P6T3	Cacna1c;Cacna1d;Cacna1f;Cacna1s	A0A1W2P6T3;A0A1W2P805;A0A1W2P6Z7;A0A1W2P731;A0A087WQT9;F8WJL1;A0A087WR02;A0A087WPZ8;A0A087WS40;A0A087WQJ4;A0A087WRZ6;A0A087WS67;A0A087WPP1;Q0PCR6;C7TQ59;C7TQ57;A0A087WRM3;A0A087WSE7;F7C376;Q01815;A0A286YD72;A0A2C9F2E5;Q99246	-2.7	0.00247202	-7.31151	-6.21796	-7.10512	-4.40495	-4.28118	-3.83528	22.7425	24.5681	24.0073	26.7466	26.6998	26.5779
Cacna1e	A0A087WS83	Cacna1e	A0A087WS83;Q61290;E9QK20;A0A1D5RLU3	-0.385	0.25765	-0.603771	-1.04811	-1.33536	-0.586395	-0.646084	-0.59904	30.4797	30.4151	30.2302	30.333	30.2494	30.2839
Cacna1i	E0CXK2	Cacna1i;Cacna1g	E0CXK2;Q5SUG2;E9Q7P2;Q5SUF5;Q5SUG1;Q5SUF8;Q5SUF9;Q5SUG3;E9PWL1;Q5SUG0;Q5SUF6;Q5SUG4;Q5SUF7	-1.47	0.00822348	-5.72911	-6.34637	-6.11422	-4.24138	-4.79321	-4.74748	22.548	24.3189	24.7598	26.2129	25.6045	25.5962
Cacna2d1	E9Q1X8	Cacna2d1	E9Q1X8;O08532	0.668	0.0321495	3.78973	3.74434	3.75666	2.93058	3.14764	3.20749	34.0835	34.0786	34.141	33.4312	33.5514	33.485
Cacna2d2	E9Q683	Cacna2d2	E9Q683;Q6PHS9	-1.42	0.00604669	-1.54421	-2.13647	-1.9015	-0.570415	-0.231796	-0.530834	29.6566	29.1839	29.2428	29.1868	29.5762	29.6232
Cacna2d3	Q9Z1L5	Cacna2d3	Q9Z1L5	-0.0386	0.872797	0.558338	0.476196	0.594467	0.524751	0.611695	0.608262	30.7228	30.6714	30.9521	30.8418	30.5109	30.5239
Cacnb1	A2A543	Cacnb1;Cacnb2	A2A543;Q8R3Z5;A0A0R4J194;A2A545;A2A542	-0.395	0.228891	0.32933	-0.301117	-0.128141	0.44276	0.383171	0.257884	30.1758	29.36	29.6765	29.3405	29.3422	29.4986
Cacnb3	D3Z3Z3	Cacnb3	D3Z3Z3;P54285;A0A2U3TZ49	0.656	0.0447293	0.375163	0.00598794	0.116108	-0.444315	-0.406835	-0.620371	29.5714	29.5821	29.3154	28.6929	28.5533	29.1469
Cacnb4	J3QK20	Cacnb4	J3QK20;Q8R0S4	-1.11	0.0922606	-2.09848	-1.53518	-1.78825	-1.60042	-0.250326	-0.23347	28.048	28.3785	28.565	28.1475	28.3151	28.5837
Cacng2	O88602	Cacng2;Cacng3	O88602	-0.716	0.258411	-0.925069	-2.15603	-2.31796	-0.673871	-1.02735	-1.54853	27.1336	26.5126	26.504	27.0986	26.655	27.1885
Cacng7	P62956	Cacng7	P62956	-2.52	0.0284011	-2.60861	-3.32629	-5.08852	-1.46882	-1.22186	-0.786712	26.6671	26.1668	24.2989	26.5494	26.5481	27.064
Cacng8	F7CZ64	Cacng8	F7CZ64;Q8VHW2	-0.529	0.12135	0.927092	1.35148	0.932161	1.35772	1.79688	1.6423	29.6122	30.086	29.1094	29.1647	29.2738	29.6454
Cactin	Q9CS00	Cactin	Q9CS00	-2.03	0.170912	-3.67619	-6.46572	-7.59834	-4.59717	-3.7105	-3.34718	25.85	24.3948	23.4111	25.2729	25.6991	25.8368
Cacybp	Q9CXW3	Cacybp	Q9CXW3	-0.322	0.305873	4.44217	4.03471	4.29652	4.32185	4.80497	4.61165	32.2724	32.3073	32.4876	33.1273	33.087	32.8579
Cad	E9QAI5	Cad;Cps1	E9QAI5;B2RQC6;G3UWN2	0.178	0.482381	-0.773066	-0.926148	-1.05036	-1.18321	-1.07869	-1.02158	30.8802	30.4301	30.453	30.1707	29.9817	30.076
Cadm1.1	E9PYN1	Cadm1	E9PYN1;Q8R5M8	-0.322	0.721703	-2.13512	0.114149	-1.63477	-1.2883	-1.16038	-0.240971	26.9088	28.6164	27.4147	27.5918	28.3452	28.515
Cadm2	G3UZM4	Cadm2	G3UZM4;Q8BLQ9	0.548	0.153032	3.46026	3.80619	4.20606	3.51626	3.17611	3.13484	32.2271	32.267	32.2759	32.1353	31.8084	31.7242
Cadm3	K4DI58	Cadm3	K4DI58;Q99N28	0.729	0.105129	4.29058	5.19807	4.64104	3.77441	3.92302	4.24527	33.0006	33.7066	33.5605	32.5338	32.5778	32.8157
Cadm4	Q8R464	Cadm4	Q8R464	-2.05	0.111262	-0.920443	2.26656	-0.384619	2.36018	1.9527	2.79581	29.0736	29.812	29.6878	30.4454	30.4625	31.0072
Cadps	A0A286YDH6	Cadps	A0A286YDH6	2.85	0.256938	-0.0598784	0.0363891	-0.138455	-0.592202	-7.20299	-0.91512	30.2169	30.0304	30.0088	29.4513	24.6489	29.0063
Cadps.1	A0A286YE00	Cadps	A0A286YE00	0.0779	0.873138	-1.30225	-0.65219	-1.24076	-1.73155	-0.953584	-0.743862	27.9074	28.2746	27.8393	27.2448	27.9335	28.1105
Cadps.2	Q80TJ1	Cadps	Q80TJ1;K4DI76;J3QJW3	1.5	0.0426751	1.35954	0.601418	0.44794	0.118015	-1.14441	-1.06974	31.5738	30.9641	31.2833	31.179	30.3721	30.5575
Cadps2	S4R1C6	Cadps2	S4R1C6;Q8BYR5;E9Q5C0;E9Q835;A0A0M3HEP6;F6SH36	1.2	0.0209275	-2.62827	-2.34319	-3.22732	-4.13159	-3.77237	-3.90932	28.0479	27.3782	27.6728	27.5085	27.0963	27.5815
Calb1	P12658	Calb1	P12658	0.127	0.715371	4.34965	4.4346	4.59872	3.9042	4.53403	4.56245	33.1007	32.704	33.0937	32.2117	32.7619	32.8642
Calb2	Q08331	Calb2	Q08331;Q8CCS7	0.0959	0.741632	2.64959	2.64389	2.67855	2.30813	2.54585	2.83039	31.7866	31.1625	31.5413	31.2516	31.2339	31.1467
Calcoco1	A0A2R8VHU8	Calcoco1	A0A2R8VHU8;E9Q7U2;Q8CGU1;A0A2R8VKP5	-0.417	0.610877	-2.54304	-3.97788	-3.89192	-2.97253	-2.2307	-3.95902	26.7025	26.5662	26.8054	26.8029	26.2604	25.7866
Calm3	P0DP28	Calm3;Calm2;Calm1;Calml3;Tnnc2	P0DP28;P0DP27;P0DP26;Q3UKW2;A0A3Q4EHJ0	-0.19	0.879661	2.95589	5.37783	2.8658	5.22758	3.21965	3.32169	31.8262	32.961	31.8927	31.3971	31.5125	31.1421
Calr	P14211	Calr	P14211	-2.2	0.00157318	3.08985	3.69919	3.1841	5.27629	5.54273	5.75647	32.4715	32.6596	32.5055	34.0892	34.623	34.8934
Calu	O35887	Calu	O35887;G3UWR0;G3V004;G3UXA8	-1.91	0.0410482	-2.68536	-0.594125	-1.08014	0.653956	0.488125	0.241152	27.1094	28.0001	27.3753	28.7397	28.918	29.1449
Calu.1	Q6XLQ8	Calu	Q6XLQ8	-1.57	0.00350729	-1.8412	-1.51671	-2.1539	-0.258442	-0.262316	-0.274817	26.648	26.8735	26.4571	28.4189	28.499	27.9759
Caly	Q9DCA7	Caly	Q9DCA7	2.91	0.000613566	1.64438	1.19583	1.77842	-1.0762	-1.3707	-1.67818	28.582	30.5895	28.2689	26.0675	27.6661	25.9883
Camk1	Q91YS8	Camk1	Q91YS8	0.0668	0.84449	1.10875	1.12585	0.528844	0.722056	0.978828	0.862067	29.572	29.8853	29.5045	29.0315	29.1049	29.1854
Camk1d	Q8BW96	Camk1d	Q8BW96	0.958	0.0993014	0.251287	0.926695	0.227173	-0.702707	-0.956317	0.189974	28.9344	29.3533	29.0885	28.4472	28.2389	29.045
Camk2a	P11798	Camk2a	P11798;F8WIS9	-0.248	0.368952	5.87304	6.12896	6.29436	6.25885	6.41949	6.36064	35.1672	35.2022	35.3265	35.3748	35.2754	35.328
Camk2b	Q5SVJ0	Camk2b	Q5SVJ0;P28652;Q5SVI0;Q5SVI2;Q5SVI3;Q5SVI9;Q5SVJ1;Q68EG2;Q5SVI1	0.0349	0.926828	5.8677	5.93003	5.21378	5.42809	5.82032	5.65839	35.4347	35.4417	35.1723	34.892	35.121	35.1058
Camk2g	A0A286YCB8	Camk2g	A0A286YCB8	4.74	0.0670869	-1.31591	0.362175	-0.263091	-6.91823	-7.1773	-1.35296	27.0298	28.2354	27.9523	24.0958	24.3418	27.4502
Camk2n1	Q6QWF9	Camk2n1	Q6QWF9	-6.15	0.00017522	-6.4399	-6.72944	-7.27871	-0.317997	-1.31668	-0.378228	24.3094	23.9965	23.8571	25.9925	25.8012	25.944
Camk2n2	Q78WH7	Camk2n2	Q78WH7	0.932	0.372128	-1.6839	1.13524	-0.992062	-1.95357	-1.26784	-1.11557	25.2005	27.5395	25.7628	25.1082	25.294	25.4135
Camk4	Q8BGR3	Camk4;Ripk2	Q8BGR3;P08414	-0.0892	0.710068	2.46862	2.53183	2.60748	2.62025	2.6924	2.56296	31.7946	31.4427	31.7534	31.9335	31.8395	31.7646
Camkk1	Q8VBY2	Camkk1	Q8VBY2;B1AUD3	-0.929	0.106685	-2.14979	-3.10054	-1.8454	-1.53684	-1.09998	-1.67085	26.1876	27.0502	27.5048	28.2136	28.4197	27.8558
Camkk2	Q8C078	Camkk2	Q8C078;A0A0G2JET2	1.28	0.0153667	1.80507	1.196	1.68115	-0.0726916	0.582442	0.346674	31.1044	31.1619	31.2276	29.8988	30.2278	30.1109
Camkv	Q3UHL1	Camkv	Q3UHL1;A0A0A6YW88	-0.0257	0.945629	5.05691	5.48771	5.34701	4.89755	5.64878	5.4224	34.2588	34.4101	34.292	34.1586	34.6687	34.744
Camlg	P49070	Camlg	P49070	-0.0377	0.897744	0.737282	0.545323	0.60643	0.901618	0.673604	0.426955	29.593	29.2975	29.4224	29.3815	28.9053	28.8239
Camsap1	A0A0A0MQE5	Camsap1	A0A0A0MQE5;A2AHC3;A2AHC4	0.709	0.0271241	0.140016	0.400897	0.327922	-0.375011	-0.376619	-0.505387	31.2101	31.3706	31.4876	30.7548	30.5408	30.6658
Camsap2	A0A0A6YY67	Camsap2	A0A0A6YY67;H7BX08;Q8C1B1;A0A0A6YXV8	-0.28	0.348603	-0.0896353	0.198613	0.170268	0.225641	0.648058	0.245823	31.2812	30.9415	31.1825	31.0746	31.0967	31.0273
Camsap3	Q80VC9	Camsap3	Q80VC9	1.13	0.00625673	1.85907	1.87526	2.09903	0.965293	0.785331	0.681815	32.5743	32.416	32.7585	31.7902	31.5251	31.6697
Camta2	B0QZH6	Camta2	B0QZH6;B0QZH4;Q80Y50	-2.34	0.00650998	-5.40886	-6.49752	-5.06546	-3.19117	-3.32566	-3.43118	25.0214	24.4728	25.164	27.0919	26.1952	26.7297
Cand1	Q6ZQ38	Cand1	Q6ZQ38	0.34	0.173477	4.30238	4.31423	4.49019	4.03607	4.02456	4.02522	35.0826	34.9327	35.0406	34.5802	34.3535	34.3647
Cand2	Q6ZQ73	Cand2	Q6ZQ73	0.186	0.893493	-6.33504	-5.99143	-6.7296	-6.97747	-8.27546	-4.36248	23.4488	24.1897	23.5594	24.9712	24.2199	24.776
Cant1	Q8VCF1	Cant1	Q8VCF1	-2.39	0.00780832	-6.69324	-7.29967	-6.51493	-3.86678	-5.2454	-4.22386	24.1561	23.6169	23.4245	24.9235	24.4667	25.3157
Canx	P35564	Canx	P35564	-1.14	0.00399576	4.08974	4.1374	4.19645	5.32726	5.21441	5.31416	33.9162	33.7926	33.9175	34.902	34.6889	34.6838
Cap1	P40124	Cap1	P40124	0.446	0.0890974	5.31391	5.39611	5.27664	4.84076	4.95083	4.85588	34.7211	34.7445	34.5951	34.3007	34.2198	34.2008
Cap2	Q9CYT6	Cap2	Q9CYT6;A0A286YCS6;D3YTR7	0.31	0.395039	1.62521	2.43215	2.23339	1.82337	1.71067	1.82809	31.3439	31.6	31.6785	31.079	31.0384	31.0684
Capn1	A0A494BBB0	Capn1	A0A494BBB0;O35350	0.429	0.171668	-1.34996	-1.84162	-1.47037	-2.09582	-2.03325	-1.8204	28.5775	28.1849	28.805	27.7337	27.6893	27.8326
Capn10	Q9ESK3	Capn10	Q9ESK3;D6RGR0	3.67	0.0043429	-2.30934	-3.1254	-3.13292	-5.47394	-6.61609	-7.49831	27.6093	26.7819	26.4018	25.1587	24.5912	24.6746
Capn2	O08529	Capn2	O08529	0.29	0.410894	1.80925	2.5322	1.95007	1.8191	1.92326	1.68034	31.8844	31.7958	31.8039	31.5997	31.3721	31.3553
Capn5	O08688	Capn5	O08688	-0.201	0.583674	1.24652	1.5616	1.61989	1.23642	1.89664	1.89769	31.298	31.4746	31.5815	31.1145	31.4202	31.4286
Capn7	Q9R1S8	Capn7	Q9R1S8;F2Z3X0	1.56	0.0651695	-3.91653	-3.46154	-3.32822	-6.18141	-4.158	-5.06126	25.5788	25.9996	25.8608	26.2554	26.8258	26.3182
Capn8	A0A0A6YVU9	Capn8	A0A0A6YVU9;A0A0R4J0K6;Q91VA3	-0.139	0.75635	-2.63193	-3.49061	-3.31711	-2.61203	-3.12236	-3.28831	27.3077	26.1661	26.4929	27.0649	26.5851	26.2959
Capns1	A0A0R4IZW8	Capns1;Capns2	A0A0R4IZW8;O88456;A0A0R4J1C2	0.512	0.126684	2.92004	3.22633	3.34603	2.87475	2.41006	2.67267	31.1524	31.1293	31.269	30.7736	30.7411	30.7754
Caprin1	Q60865	Caprin1	Q60865	-3.35	0.000200118	0.296132	0.70202	0.540656	3.61599	3.98495	3.97356	29.7503	29.9007	29.9523	32.5319	32.777	32.8688
Capza1	Q5RKN9	Capza1	Q5RKN9;P47753	0.232	0.636697	1.9518	3.09533	2.39784	1.91182	2.37722	2.45998	30.7429	31.444	30.5148	29.9635	30.3803	30.6805
Capza2	P47754	Capza2	P47754;D6RCW7;A0A0N4SVM0	0.102	0.832206	4.42852	5.33717	5.10399	4.3939	5.12045	5.05039	33.1363	33.5002	33.5124	32.6321	33.2101	33.2495
Capzb	A2AMW0	Capzb	A2AMW0;F7CAZ6	-0.424	0.308734	1.97916	2.10685	1.21576	2.05996	2.09639	2.41778	30.7568	30.5083	29.9097	30.5958	30.5868	30.513
Capzb.1	P47757	Capzb	P47757;A0A0A0MQI9;F6YHZ8	0.483	0.368273	2.46013	1.9067	1.01525	1.31872	1.33506	1.28045	31.3649	30.5287	29.7905	29.9902	29.9173	29.8299
Car10	E9Q2V1	Car10;Ca10	E9Q2V1;P61215;Q9CZQ3;Q3TRQ4	-2.66	0.231913	-0.730907	-6.35172	-6.43281	-1.79759	-2.03696	-1.71561	27.6515	23.4082	24.2675	26.378	26.057	26.3625
Card10	E9PUV9	Card10	E9PUV9;P58660	-1.69	0.17272	-4.86414	-7.39421	-4.08788	-3.3792	-3.9527	-3.9526	25.884	24.6495	26.5306	27.1357	26.4728	26.4401
Carhsp1	Q9CR86	Carhsp1	Q9CR86	-1.47	0.0942317	0.67846	-0.848464	-1.5585	0.757877	0.912812	1.00169	28.5016	27.6115	27.0548	27.6809	27.8536	27.8436
Carm1	D3YUP1	Carm1	D3YUP1;Q9WVG6	0.073	0.780792	1.61191	1.8817	1.87332	1.82287	1.63854	1.68651	31.1449	30.7363	30.9225	31.0316	30.8137	30.8039
Carmil1	D3Z030	Carmil1	D3Z030;Q6EDY6;F7AI27	1.22	0.182698	-2.6246	-3.15792	-3.0668	-3.05829	-3.91798	-5.5305	28.1864	27.471	27.6363	27.2383	26.6299	26.9499
Carmil2	S0DHL8	Carmil2	S0DHL8;Q3V3V9	0.995	0.0513952	-2.24992	-3.31996	-2.67129	-3.87731	-3.62695	-3.72169	27.8035	27.3839	28.2807	26.8207	27.0786	27.0281
Carmil3	Q3UFQ8	Carmil3	Q3UFQ8	-0.0996	0.830423	-1.00068	-1.32986	-1.52805	-1.47437	-1.51188	-0.573665	29.9193	29.0958	29.3521	29.571	28.9524	29.2464
Cars	Q9ER72	Cars	Q9ER72	-0.838	0.0155908	1.62736	1.46202	1.65738	2.50202	2.28483	2.4725	32.0198	32.064	32.0563	32.5058	32.1634	32.1993
Cars2	G3X975	Cars2	G3X975;Q8BYM8	-2.95	0.0639911	-3.03469	-6.95995	-4.00304	-1.76515	-1.94335	-1.42518	27.1167	23.8506	26.8114	27.0452	26.9691	27.0188
Cartpt	P56388	Cartpt	P56388	-4.15	0.10786	-1.51379	-6.49597	-7.57332	-1.886	-1.93768	0.679754	26.8608	24.5648	24.2088	26.457	26.1413	26.1428
Casc4	Q6P2L7	Casc4	Q6P2L7;E9PZJ6;A2AR60	-7.18	0.00058665	-7.78044	-5.54711	-7.05562	-0.211979	0.350523	1.01761	24.4512	24.5284	24.8488	29.0961	29.6919	29.6246
Casd1	Q7TN73	Casd1	Q7TN73;M0QWG8	-4.74	0.00028525	-7.33712	-6.71263	-7.78578	-2.2573	-2.45921	-2.89678	24.7819	23.8786	24.2534	27.6127	27.2041	27.6456
Cask	B1AUH5	Cask	B1AUH5	-1.83	0.459566	-2.43745	-7.54451	-7.16028	-6.65534	-2.40972	-2.58792	25.4215	23.688	23.1457	23.5658	25.0072	24.9017
Cask.1	O70589	Cask	O70589;A0A067XG53	1.07	0.0255341	2.79386	3.59705	3.37712	2.1121	2.36196	2.09258	33.3875	33.5151	33.5227	32.6308	32.4265	32.3796
Caskin1	Q6P9K8	Caskin1;Caskin2	Q6P9K8	0.471	0.227908	1.17292	1.47778	0.839172	0.641054	1.04893	0.3872	32.2371	32.0481	32.0909	31.2494	31.4955	31.2807
Casp3	P70677	Casp3	P70677	0.633	0.0492533	4.88925	5.01654	4.64409	4.09099	4.27326	4.28572	33.4416	33.4648	33.3077	32.6815	32.7122	32.629
Casp7	P97864	Casp7	P97864	0.35	0.466354	-3.07709	-3.46031	-2.83317	-3.14683	-3.16181	-4.1105	25.3531	25.8854	25.8214	25.3104	25.4632	25.6057
Casq1	O09165	Casq1	O09165	4.23	0.0621029	2.11727	2.57961	1.84227	1.12743	-4.61308	-2.65973	29.0132	31.1106	30.2752	26.6983	25.53	26.4256
Castor2	Q8CAB8	Castor2;Castor1	Q8CAB8	1.1	0.15877	-1.02351	-1.16231	-1.65248	-1.71706	-3.56016	-1.87471	26.9319	26.7436	27.1099	26.6925	25.9688	26.4239
Cat	P24270	Cat	P24270	-0.629	0.0803735	1.70232	1.8976	2.2498	2.755	2.6078	2.37411	31.7007	31.7837	31.9517	32.1526	31.9201	31.7981
Catip	F7AAT1	Catip	F7AAT1;B9EKE5	-0.404	0.907651	-6.93156	-0.961696	-0.557835	-0.365079	-0.236614	-6.63597	23.6596	27.3899	27.7534	27.713	27.7325	24.0368
Cbarp	E9PW07	Cbarp	E9PW07;Q66L44	0.344	0.368505	-1.78496	-1.08368	-1.09686	-1.67858	-1.43434	-1.8852	27.9081	28.218	27.9949	27.8742	27.645	27.4403
Cbarp.1	E9Q6U0	Cbarp	E9Q6U0	-1.69	0.561262	-6.11222	-0.641962	-6.82357	-6.05859	-1.17024	-1.27045	23.9841	25.8925	24.0351	24.259	25.3246	25.1916
Cbfb	Q08024	Cbfb	Q08024	0.199	0.934655	-6.67492	-2.00719	-2.39414	-6.80292	-2.49491	-2.37604	23.6164	25.5163	25.3604	24.108	24.9665	25.0526
Cbl	A0A0U1RQ85	Cbl	A0A0U1RQ85;P22682;A0A0X1KG61;A0A0U1RP47	0.65	0.0870954	-1.73089	-1.81624	-1.15427	-2.18792	-2.35502	-2.10812	28.5485	28.1151	28.8558	28.1115	28.0002	28.0142
Cbr1	P48758	Cbr1;Gm5678;Cbr3	P48758;A0A338P684	0.626	0.0319463	4.68415	4.60331	4.64708	4.02417	4.06333	3.96824	32.8979	33.5411	33.1767	32.7903	32.8108	33.0711
Cbr4	Q91VT4	Cbr4	Q91VT4	-3.32	0.0551038	-2.9165	-5.84793	-7.09277	-2.24487	-2.29102	-1.34755	24.1132	23.3323	23.4156	26.3126	25.6285	25.7635
Cbwd1	Q8VEH6	Cbwd1	Q8VEH6	2.62	0.0505707	-3.55137	-2.11237	-2.32873	-6.17227	-3.56934	-6.10178	NA	NA	NA	NA	NA	NA
Cbx1	P83917	Cbx1	P83917;Q7TPM0;Q9CYJ8	-7.53	0.000137216	-6.24372	-7.79474	-6.81182	0.314692	0.759306	0.653554	23.3971	24.3994	23.7488	27.885	28.2609	28.12
Cbx3	Q9DCC5	Cbx3	Q9DCC5;P23198	-10.4	8.83863e-05	-6.38193	-7.63444	-6.26149	3.02089	3.97313	4.0506	23.9907	23.9348	24.3863	30.4652	31.2852	31.2812
Cbx5	Q61686	Cbx5	Q61686	-9.19	4.94181e-05	-5.93435	-6.631	-6.71934	2.9673	2.64047	2.66595	24.7651	23.5131	24.6374	30.3987	30.7112	30.6918
Cbx6	Q3UK98	Cbx6	Q3UK98;Q9DBY5	-3.59	0.00204295	-7.25076	-5.82898	-6.96092	-2.61699	-3.48727	-3.1576	23.5655	24.2695	23.4165	24.9677	25.6428	25.9397
Cc2d1a	Q8K1A6	Cc2d1a	Q8K1A6;E9PX94	0.114	0.876234	0.775129	-1.24951	-0.37826	-0.368745	-0.277659	-0.549595	30.7126	29.5516	29.9974	30.0218	29.7204	29.6051
Ccar1	Q8CH18	Ccar1	Q8CH18	-7.34	0.000410946	-6.95875	-5.28883	-7.55863	0.669085	0.918898	0.612522	23.6874	24.7581	24.6224	30.9379	30.5909	30.5815
Ccar2	Q8VDP4	Ccar2	Q8VDP4	-5.2	0.000800087	-2.31406	-3.43574	-4.29107	1.98482	1.76927	1.80758	28.8407	26.9674	30.3713	32.0966	32.4016	30.2142
Ccdc115	Q8VE99	Ccdc115	Q8VE99	-1.55	0.109335	-0.248619	-2.66766	-0.764205	0.0204062	0.537998	0.421358	28.0044	26.3701	27.7509	28.1774	28.4822	28.4412
Ccdc117	Q6PB51	Ccdc117	Q6PB51	1.22	0.558396	-5.40608	-1.16791	-6.68393	-4.32268	-5.93033	-6.65965	23.0231	27.3542	23.8836	23.4482	23.7247	23.1503
Ccdc124	Q9D8X2	Ccdc124	Q9D8X2	-0.212	0.772366	-1.97651	-0.214652	-1.32979	-1.1206	-0.359719	-1.40395	23.564	27.9458	27.2959	26.4325	27.0673	26.8394
Ccdc127	E0CYX9	Ccdc127	E0CYX9;Q3TC33;E0CYP1	-0.353	0.443678	-0.0902066	-0.474645	-1.02421	-0.511004	-0.254005	0.233837	27.9008	27.6271	28.1385	27.7262	27.715	28.0743
Ccdc13	D3YV10	Ccdc13	D3YV10	0.541	0.721883	-7.67039	-3.87558	-3.93725	-5.00794	-5.9669	-6.13118	24.0689	26.1514	25.8668	25.2796	24.7825	23.8902
Ccdc134	Q8C7V8	Ccdc134	Q8C7V8;A0A2R8VKP7;A0A2R8VI68	-5.28	0.000263457	-6.97647	-5.93672	-7.23606	-1.57752	-1.37114	-1.36267	24.6459	24.3898	24.8459	26.1898	26.2869	26.2635
Ccdc136	A0A0N4SW14	Ccdc136	A0A0N4SW14;D3Z165;E9QP94;Q3TVA9;E6Y2W7;E6Y2W6;F6VCV9	-0.64	0.121087	-0.185326	-0.299613	-0.436458	-0.0766826	0.266996	0.809167	29.0042	28.6754	28.7789	29.1151	28.9221	29.2808
Ccdc137	H3BLI5	Ccdc137	H3BLI5;Q8R0K4	-3.89	0.0073206	-5.09539	-6.09707	-7.69786	-1.89263	-2.64778	-2.68342	NA	NA	NA	NA	NA	NA
Ccdc177	Q3UHB8	Ccdc177	Q3UHB8	0.36	0.580741	-1.14516	0.248679	-0.939277	-1.1371	-0.379761	-1.3978	28.6468	29.3484	28.9992	28.2054	28.2537	28.0973
Ccdc181	Q80ZU5	Ccdc181	Q80ZU5	2.8	0.185914	-1.43792	0.129958	-1.24003	-7.0506	-1.97758	-1.91427	28.136	28.7786	28.1702	25.071	26.9108	27.7202
Ccdc184	Q8BMK5	Ccdc184	Q8BMK5	-3.35	0.00747043	-7.67566	-7.15364	-5.84622	-4.35764	-3.30298	-2.97381	23.1797	24.9026	25.3169	23.3964	24.3617	24.6581
Ccdc186	Q8C9S4	Ccdc186	Q8C9S4;F7CUD4	-0.993	0.236673	-5.4439	-4.3784	-5.36997	-4.03363	-3.05432	-5.12681	25.1946	25.9853	25.5662	25.7338	25.9351	25.337
Ccdc22	Q9JIG7	Ccdc22	Q9JIG7	0.037	0.893041	0.246852	-0.162847	0.0152781	-0.0456029	-0.0037315	0.0375886	30.4073	29.3942	29.8127	29.8186	29.3921	29.4392
Ccdc25	Q78PG9	Ccdc25	Q78PG9	0.131	0.754045	-0.211023	-0.218477	0.503803	-0.134864	-0.401149	0.218587	28.2277	28.3788	28.792	27.9863	28.1134	28.1475
Ccdc28b	Q8CEG5	Ccdc28b	Q8CEG5;Q9D1N8	1.04	0.0234925	0.753466	0.0143716	0.124099	-0.697178	-0.708739	-0.816043	27.856	27.3003	27.3862	26.6642	26.5926	26.4305
Ccdc43	E9Q2S9	Ccdc43	E9Q2S9;Q9CR29	0.516	0.501684	-2.8448	-1.29114	-1.62669	-3.29077	-1.92679	-2.09188	25.2945	26.5653	26.383	24.6153	25.8899	23.5759
Ccdc47	Q9D024	Ccdc47	Q9D024;F7C265	-3.56	0.000126391	-1.31348	-1.44124	-1.62523	2.2043	1.95209	2.13437	27.5351	28.5605	28.2619	30.4579	30.7864	31.4176
Ccdc50	F6UK66	Ccdc50	F6UK66;Q810U5	0.701	0.189174	-1.46246	-0.974265	-0.399793	-1.14694	-2.03297	-1.75897	27.2447	27.1718	27.5839	27.1551	26.9085	26.443
Ccdc51	Q3URS9	Ccdc51	Q3URS9	-0.905	0.498339	-2.06765	-4.8448	-1.84795	-1.40704	-1.38422	-3.25529	27.367	26.1439	27.2455	27.1	26.9189	26.8735
Ccdc58	F8WJI3	Ccdc58	F8WJI3;Q8R3Q6;E9Q4B5	-3.29	0.000759372	-1.91991	-2.98913	-2.42146	0.827351	1.01702	0.692398	27.0853	26.1388	26.4541	27.6542	28.1945	27.5281
Ccdc6	D3YZP9	Ccdc6	D3YZP9	-0.13	0.825569	0.304731	1.03302	-0.386499	0.0211672	0.62845	0.690589	29.6563	29.8435	29.4737	29.2669	29.4646	29.5802
Ccdc60	A0A0R4J120	Ccdc60	A0A0R4J120;Q8C4J0	-2.03	0.331973	-3.60339	-1.06823	-7.06963	-2.75898	-1.13325	-1.77078	24.1711	26.5949	24.7064	25.7743	26.5425	26.2074
Ccdc63	A0A0R4J0M8	Ccdc63	A0A0R4J0M8;Q8CDV6	0.414	0.33446	-4.16619	-4.54257	-4.64206	-5.41972	-4.59317	-4.57843	25.2785	24.9489	25.0818	24.5351	24.9037	24.8947
Ccdc7a	A0A1L1SS82	Ccdc7a	A0A1L1SS82	-2.13	0.185336	-9.18425	-6.82645	-6.87656	-6.90066	-6.24597	-3.33931	24.1457	25.1832	25.2347	24.8626	23.8573	26.8905
Ccdc8	D3YZV8	Ccdc8	D3YZV8	0.739	0.374898	-3.81744	-1.98823	-1.66469	-2.85348	-3.42999	-3.40281	26.5779	28.2941	28.7709	27.1259	26.6266	26.807
Ccdc85a	E0CX32	Ccdc85a	E0CX32;Q5SP85	1.2	0.236274	-3.44832	-2.8276	-1.80076	-3.07041	-3.33234	-5.267	26.7754	27.2027	27.5904	26.9916	26.0224	23.8355
Ccdc88a	Q5SNZ0	Ccdc88a	Q5SNZ0	0.179	0.626662	0.508199	0.505929	0.0343207	-0.183726	0.467245	0.229395	31.7083	31.6563	31.5682	31.0899	31.2785	31.2368
Ccdc9	G3X927	Ccdc9	G3X927;D3YW42;Q8VC31;G3UYE3	-0.4	0.715412	-2.62451	-5.63364	-4.7545	-3.60988	-3.76022	-4.44271	24.3642	24.0608	25.149	25.5339	25.5895	25.4144
Ccdc90b	Q8C3X2	Ccdc90b	Q8C3X2	-2.12	0.130427	-6.85529	-3.62803	-3.32703	-2.43195	-2.4708	-2.53361	23.9275	25.0345	25.3752	26.3586	26.2305	26.1349
Ccdc91	Q9D8L5	Ccdc91	Q9D8L5	-3.69	0.0187169	-4.43824	-7.02335	-4.21629	-2.37319	-0.903989	-1.34252	26.5879	23.8162	26.8486	26.5379	27.1392	26.8554
Ccdc92	Q8VDN4	Ccdc92	Q8VDN4;D3YUR9	-0.062	0.948818	-1.01058	-3.30766	-1.78449	-1.09879	-2.23314	-2.58489	27.9563	26.6072	27.5013	27.3436	26.4832	26.504
Ccdc93	E9QAD4	Ccdc93	E9QAD4;Q7TQK5	-1.31	0.00445827	-0.603474	-1.06068	-0.793654	0.451048	0.571278	0.456297	29.5643	29.5427	29.4935	28.9844	30.4116	29.9453
Cck	P09240	Cck	P09240;A0A1L1SU12;A0A1L1SRD3;Q8R041	0.852	0.0837131	2.63301	2.89096	2.25185	2.24076	1.66694	1.31104	29.2171	28.7455	29.2435	29.2782	28.2488	28.1355
Ccm2	Q8K2Y9	Ccm2	Q8K2Y9;F7AVU1;E0CXR5	-0.877	0.194166	-1.28669	-2.86444	-2.68991	-1.02133	-1.64624	-1.54193	28.5016	26.6216	26.7396	27.7854	27.2494	27.2013
Ccn1	P18406	Ccn1	P18406	3.9	0.0025874	-2.18193	-2.93084	-3.13121	-6.2403	-7.66946	-6.03383	NA	NA	NA	NA	NA	NA
Ccn3	Q64299	Ccn3	Q64299	-0.702	0.0697927	-0.0847106	0.44455	-0.249649	0.841676	0.639635	0.734911	29.1011	29.1268	29.5814	29.2945	29.1287	29.3112
Ccnh	E9PWD3	Ccnh	E9PWD3;Q3UUW5;Q61458	-4.37	0.000131339	-6.91793	-7.01672	-6.49261	-2.16651	-2.61577	-2.52446	24.5829	24.2455	23.7655	26.5694	26.082	26.1005
Ccnt1	Q9QWV9	Ccnt1	Q9QWV9;E9Q7A7	-2.86	0.00709956	-7.10045	-6.14488	-6.07388	-3.47123	-2.8493	-4.42916	24.3197	23.9117	23.8474	25.8301	25.8361	25.8194
Ccny	Q8BGU5	Ccny	Q8BGU5	0.875	0.174682	1.06592	0.793092	1.07592	-0.880176	0.513982	0.675275	30.2158	29.535	29.7342	29.2857	29.0694	28.9674
Ccnyl1	E9Q226	Ccnyl1;Ccny	E9Q226;D3YUJ3	0.826	0.0880961	-0.479297	-1.38219	-0.931906	-1.46079	-2.11271	-1.69722	27.9096	27.1474	28.0282	27.0439	26.7623	27.0198
Ccs	A0A494BB58	Ccs	A0A494BB58;A0A494BAJ5;A0A494BBF1;Q9WU84	1.46	0.0650876	-0.629887	-1.90533	-0.665298	-2.10554	-2.19257	-3.29038	26.9336	25.8902	26.8791	27.0927	27.1384	26.0078
Ccsap	Q8QZT2	Ccsap	Q8QZT2	-4.93	0.000229212	-7.51411	-7.31539	-6.71885	-1.87232	-2.14865	-2.72698	24.1081	23.4373	23.4901	26.1891	25.7936	25.6767
Cct2	P80314	Cct2	P80314	-0.537	0.0791154	4.55265	4.75683	4.38538	4.97222	5.20033	5.13318	34.1316	34.284	34.2299	34.5722	34.6398	34.5844
Cct3	P80318	Cct3	P80318;E9Q133;Q3U0I3;F6Q609	-0.658	0.0330095	4.77521	4.84983	4.7503	5.31576	5.45819	5.57499	34.4299	34.3197	34.3914	34.755	34.9304	34.9809
Cct4	P80315	Cct4	P80315;G5E839	-0.767	0.021191	4.23771	4.15295	4.04511	4.76665	4.96821	5.00118	33.9016	33.7929	33.6655	34.2748	34.5698	34.4989
Cct5	P80316	Cct5	P80316	-0.38	0.149034	5.19425	5.03724	5.32795	5.5416	5.56368	5.59434	34.6843	34.6898	34.8702	34.9797	34.9701	34.9125
Cct6a	P80317	Cct6a	P80317	-0.7	0.0345123	4.55088	4.19263	4.407	5.1689	5.10492	4.97555	34.238	33.4665	33.6425	34.2351	34.2531	34.3138
Cct6b	Q61390	Cct6b	Q61390;B1AT05	-3.45	0.121207	-5.33488	-2.2993	-8.21974	-2.88543	-1.10062	-1.52042	25.843	26.5955	23.2754	26.8404	27.664	28.1307
Cct7	P80313	Cct7	P80313;A0A0N4SV00	-0.246	0.291381	4.65554	4.66673	4.71985	4.92518	4.91745	4.93713	34.1631	34.0081	34.0622	34.3623	34.3017	34.2072
Cct8	P42932	Cct8	P42932;H3BL49	-0.912	0.0137817	4.29414	4.48721	4.21887	5.09259	5.37836	5.26644	34.377	34.102	34.1883	34.8545	34.886	34.9071
Ccz1	Q8C1Y8	Ccz1	Q8C1Y8	1.08	0.126352	-1.3107	-2.21528	-1.05526	-1.80162	-2.8987	-3.11764	27.7887	27.8609	27.6838	27.4647	27.2771	27.5508
Cd101	A0A0B4J1L8	Cd101	A0A0B4J1L8;A8E0Y8	-2.18	0.382011	-2.72427	-6.253	-6.65561	-6.54902	-1.50043	-1.04277	NA	NA	NA	NA	NA	NA
Cd151	O35566	Cd151	O35566;A0A1B0GRG3;A0A1B0GSK8	1.05	0.572438	-3.73241	-6.45032	-2.25263	-6.13149	-6.31395	-3.13052	NA	NA	NA	NA	NA	NA
Cd163	Q2VLH6	Cd163	Q2VLH6	-0.91	0.302437	-5.07211	-7.45467	-5.6585	-5.48438	-5.08775	-4.88197	25.4168	24.7829	24.6942	24.2696	25.2478	23.9637
Cd200	E9QMY1	Cd200	E9QMY1;Q80VX2;O54901;E9PZI9;Q05D16	0.22	0.608055	6.2368	5.39118	5.28944	5.26447	5.40514	5.58756	33.5757	33.5584	33.7368	32.9018	33.0071	33.0985
Cd276	Q8VE98	Cd276	Q8VE98;A0A1L1SV51	1.13	0.18921	-0.66745	-0.856614	-0.473437	-1.1628	-1.05123	-3.17553	27.495	27.3169	28.1259	26.5628	26.6535	25.985
Cd2bp2	A0A0U1RP07	Cd2bp2	A0A0U1RP07;A0A0U1RNG1;Q9CWK3	-4.19	0.000984625	-6.10669	-6.29973	-7.62897	-2.4684	-2.42569	-2.5671	23.8293	24.3838	24.3309	24.7163	24.6039	24.5168
Cd40	P27512	Cd40	P27512	-4.03	0.000611458	-6.31215	-5.55363	-6.67358	-2.49749	-1.77292	-2.18824	23.6338	24.6075	25.0629	25.7463	26.3381	26.1141
Cd44	Q3U8S1	Cd44	Q3U8S1;A2APM5;A2APM3;A2APM4;E9QKM8;Q80X37;A2APM1;A2APM2;P15379	-1.37	0.00773561	-1.32701	-1.4076	-0.890736	-0.0880879	0.161533	0.424211	27.7475	27.6271	28.0541	28.202	27.9123	27.8594
Cd47.1	A0A2R8W6P0	Cd47	A0A2R8W6P0;D3Z187;A0A2R8VI94	-0.0809	0.788741	-0.551055	-0.599827	-0.627495	-0.838795	-0.34506	-0.351805	27.7533	27.8095	27.7168	27.2783	27.6386	27.5757
Cd63	A0A1W2P8C6	Cd63	A0A1W2P8C6;P41731	-1.14	0.0246297	-1.38777	-0.927864	-0.750394	0.20509	0.427706	-0.26672	25.7515	25.9285	26.2593	27.1111	27.2445	26.5172
Cd81	P35762	Cd81	P35762	0.362	0.551874	3.77012	5.1201	5.07798	3.88962	4.37735	4.61492	31.817	32.6031	32.5609	31.8855	31.7699	31.9678
Cd9	P40240	Cd9	P40240	-1.26	0.474975	-1.99066	-6.46497	-1.89732	-1.8398	-2.19076	-2.55372	25.4897	23.4615	25.4534	25.1349	24.8414	24.5776
Cd99	Q8VCN6	Cd99	Q8VCN6	0.906	0.391525	-0.974458	1.28363	0.269907	-1.94652	-0.0319096	-0.161192	26.7869	27.1913	27.4617	26.1843	26.8664	26.9874
Cd99l2	I7HJQ8	Cd99l2	I7HJQ8;A2AP74;Q8BIF0	0.316	0.684951	1.7743	3.34406	2.60351	1.40856	2.97887	2.3854	29.9485	31.1414	30.7709	29.273	29.7068	29.9791
Cdadc1	G3UW39	Cdadc1	G3UW39;Q8BMD5	-0.577	0.804998	-6.86913	-1.76606	-6.96469	-4.46026	-2.93221	-6.47597	NA	NA	NA	NA	NA	NA
Cdc123	Q8CII2	Cdc123	Q8CII2	-2.42	0.00044447	-5.82069	-5.81727	-6.03088	-3.57802	-3.59098	-3.24421	24.3497	23.3721	23.8852	24.913	24.8107	25.1247
Cdc16	Q8R349	Cdc16	Q8R349	-1.47	0.0018673	-0.631928	-0.718272	-0.766476	0.627717	0.803142	0.856124	29.3514	29.1809	29.334	29.826	29.7482	29.839
Cdc23	A0A0R4J1W7	Cdc23	A0A0R4J1W7;Q8BGZ4;G3X8W7	-1.87	0.00449048	-0.950117	-0.812861	-1.36113	0.912471	1.19032	0.395789	29.2389	29.2238	27.6887	29.8169	30.3419	30.5093
Cdc27	A2A6Q5	Cdc27	A2A6Q5	-2.26	0.0253158	-5.33911	-6.13996	-4.82115	-3.24265	-2.2324	-4.05969	26.1142	22.9368	26.5026	26.3218	26.615	25.96
Cdc34	A0A1W2P7U1	Cdc34;Cdc34b	A0A1W2P7U1;Q8CFI2;A0A087WP01;A0A140T8I4;A0A1W2P7T2;A0A1W2P7U9	-4.09	0.137347	-0.925996	-7.69918	-7.25337	-0.364131	-2.22403	-1.01348	26.9275	23.7537	23.5055	26.295	26.1191	25.7426
Cdc37	Q61081	Cdc37	Q61081;A0A1L1STC0	-0.238	0.381433	3.15046	2.77697	2.81595	3.07369	3.18566	3.1966	32.0445	31.7924	31.8903	31.4097	31.1533	31.2879
Cdc37l1	A0A286YCB4	Cdc37l1	A0A286YCB4;Q9CZP7	-0.746	0.29647	-3.03745	-1.56331	-1.50591	-1.70912	-1.45692	-0.703777	27.1498	26.8583	26.8918	26.7382	26.7488	26.6576
Cdc40	Q9DC48	Cdc40	Q9DC48	-3.48	0.0142997	-7.78135	-5.57353	-4.96072	-2.46448	-2.91988	-2.48686	23.6312	23.7038	23.3623	27.3052	26.9355	26.8255
Cdc42	P60766	Cdc42	P60766	0.241	0.693992	5.12812	6.25542	4.654	4.90706	5.33326	5.07319	33.4125	32.6802	32.9813	33.0751	33.1248	33.0763
Cdc42bpa	D3YYN8	Cdc42bpa	D3YYN8;E9PVY0;A0A1D5RLQ9;Q3UU96;H7BX44;F6Q5A5	0.255	0.29885	-0.223731	-0.0446513	-0.22764	-0.463444	-0.349545	-0.447052	30.5364	30.8659	30.9213	30.5985	30.4631	30.5092
Cdc42bpb	Q7TT50	Cdc42bpb;Dmpk	Q7TT50	-0.00862	0.981243	1.54489	2.09769	1.76231	1.49289	1.98461	1.95325	32.9506	33.087	32.9341	32.5251	32.5645	32.6348
Cdc42ep4	Q9JM96	Cdc42ep4	Q9JM96;A2A6Q2	0.821	0.0414475	-0.17273	0.0438775	-0.306726	-0.904469	-0.684796	-1.3087	28.7671	28.6028	28.6512	27.9002	27.7391	27.7784
Cdc42se2	Q8BGH7	Cdc42se2	Q8BGH7	4.46	0.125317	3.3467	2.41034	3.05692	-6.1992	0.607427	1.02483	29.164	27.9448	28.7447	24.1893	26.1022	26.4868
Cdc5l	Q6A068	Cdc5l;Gm9045;Gm9048;Gm32717;Gm9046;Gm9044	Q6A068;A0A1W2P7Z8;A0A1W2P7H4;A0A1W2P7S8;A0A1W2P855;A0A1W2P6Q8	-5.85	0.00734039	-7.44028	-3.69432	-3.88128	0.599533	0.858741	1.07142	23.3622	27.3709	27.3541	29.7388	29.6708	31.4668
Cdc73	Q8JZM7	Cdc73	Q8JZM7	-4.3	0.00227845	-5.00648	-5.4748	-6.81379	-2.01337	-1.51571	-0.880073	25.6747	23.6033	23.0514	28.2257	28.0662	28.033
Cdh10	P70408	Cdh10	P70408;H3BKV8	0.443	0.507241	-1.01757	-1.07773	-2.61978	-1.73481	-2.26208	-2.04679	28.7779	28.5902	27.8347	27.985	27.7821	27.5582
Cdh11	P55288	Cdh11	P55288	0.554	0.192484	-1.47692	-2.12186	-1.70295	-1.96107	-2.75009	-2.25138	28.0998	27.7854	27.9477	27.9779	27.4481	27.5061
Cdh13	Q9WTR5	Cdh13	Q9WTR5	0.712	0.0659477	3.90445	4.24081	3.89762	2.94942	3.39715	3.56143	33.5234	33.7723	33.2808	32.3828	33.0742	33.2306
Cdh2	D3YYT0	Cdh2	D3YYT0;P15116	0.26	0.50267	1.38898	2.08761	1.9092	1.20559	1.59641	1.8025	31.5312	31.7749	31.6672	30.8848	31.0611	31.0632
Cdh4	P39038	Cdh4	P39038	-0.116	0.844723	-4.74669	-4.28342	-4.23988	-3.77563	-3.98253	-5.16462	25.7189	25.4788	25.6553	25.4326	25.0422	23.5873
Cdh6	P97326	Cdh6	P97326	0.314	0.725265	-1.43067	-2.56977	-1.14787	-2.38575	-0.846353	-2.85795	28.1344	28.1569	27.955	27.9392	27.7593	27.2703
Cdh8	D6RG94	Cdh8	D6RG94;E9PYB2;Q8C449;E9Q451;P97291	0.643	0.234495	-3.14208	-2.71503	-3.81122	-3.78968	-4.36621	-3.4421	25.0681	25.6227	25.1512	25.4753	24.8899	25.1521
Cdip1	Q9DB75	Cdip1	Q9DB75	0.166	0.879338	-1.73099	0.821193	0.497411	0.105773	-1.16128	0.144453	25.6776	27.2334	26.773	26.2305	25.7074	27.1891
Cdipt	A0A0U1RP13	Cdipt	A0A0U1RP13;Q8VDP6	-1.37	0.0141909	1.5018	0.614622	1.29791	2.71334	2.35587	2.46736	29.9544	29.1186	29.7884	30.0046	29.6705	29.7251
Cdk11b	A2A9P6	Cdk11b;Ptk6	A2A9P6;P24788	-2.95	0.110899	-6.77645	-4.49617	-1.72054	-1.16452	-1.77913	-1.18788	24.0887	25.9119	27.8646	28.8136	27.8286	28.7324
Cdk13	A0A1Y7VLM0	Cdk13;Cdk12	A0A1Y7VLM0;Q14AX6;Q69ZA1	-1.37	0.00785674	-6.27064	-6.60313	-6.11572	-4.6617	-5.01321	-5.21952	23.8161	24.3434	24.0221	25.2078	24.7669	24.5279
Cdk14	E9PVC7	Cdk14	E9PVC7;O35495	1.83	0.143093	-2.39461	-2.66705	-0.971764	-4.94338	-4.45923	-2.1345	27.6343	27.079	27.9741	23.8109	25.2471	25.7389
Cdk16	Q04735	Cdk16	Q04735	0.268	0.612343	0.431249	-0.366771	-0.744786	-0.28997	-0.247693	-0.947078	29.9599	29.2155	29.4595	28.9009	28.8696	28.6512
Cdk17	A0A1L1SUS7	Cdk17	A0A1L1SUS7;Q8K0D0	-1.26	0.00919835	-2.76313	-2.35165	-2.64801	-1.01862	-1.37514	-1.57916	27.5516	27.4402	27.4737	28.0216	27.6488	27.5004
Cdk19	Q8BWD8	Cdk19;Cdk8	Q8BWD8;A0A1L1SRF1;E0CYC4;E9Q6E2;G5E8L1;Q8R3L8	-1.95	0.0208073	-6.66204	-5.64941	-6.6667	-3.62795	-4.96355	-4.54152	23.8368	24.075	23.9239	24.8298	24.5128	24.6161
Cdk20	A0A1Y7VIW8	Cdk20	A0A1Y7VIW8;Q9JHU3;A0A1Y7VNS6	-0.286	0.919903	-5.01443	-3.64786	-3.545	-6.2696	0.965118	-6.04385	23.2217	26.5904	24.0512	23.4125	29.2571	24.0147
Cdk2ap1	F2Z4B3	Cdk2ap1;Cdk2ap2	F2Z4B3;O35207;G3UYI1;Q9CPY4	-5.79	0.00134834	-8.34366	-6.42024	-6.23379	-0.561377	-1.70633	-1.35741	24.2429	23.7344	24.8043	25.7071	25.5691	25.8853
Cdk5	P49615	Cdk5;Cdk1;Cdk4;Cdk3;Cdk6;Cdk2	P49615;A0A0G2JDL3	-0.199	0.55697	3.09443	3.38713	3.42154	3.73358	3.64472	3.12212	32.1507	32.3286	32.375	32.5621	32.1355	31.8949
Cdk5r1	P61809	Cdk5r1	P61809	-3.58	0.018342	-5.60978	-3.11676	-6.13163	-1.04865	-1.19064	-1.87598	23.8219	26.6756	24.1138	26.7829	27.1421	26.6242
Cdk5r2	O35926	Cdk5r2	O35926	-3.94	0.0254016	-3.66581	-6.75645	-7.45236	-2.25007	-2.14258	-1.66312	25.9115	23.4681	24.0596	27.094	26.1251	26.3453
Cdk5rap3	Q99LM2	Cdk5rap3	Q99LM2	-2.11	0.00935731	-3.44843	-4.95655	-4.22376	-2.13551	-2.08729	-2.09007	26.5815	25.686	26.1291	27.3144	26.4351	26.5636
Cdk9	Q99J95	Cdk9	Q99J95	-5.41	0.000475779	-6.83145	-5.39557	-6.94114	-1.1422	-0.738847	-1.06384	24.2247	23.8998	23.9958	27.9429	27.9168	27.4574
Cdkl5	A0A0G2JF79	Cdkl5;Cdkl3;Prkd3;Stk36;Cdkl1;Cdkl2;Prkd2;Prkd1	A0A0G2JF79;A0A0G2JGW6;Q3UTQ8;A0A0G2JFE2	-1.82	0.00265302	-1.74969	-2.37072	-2.22869	-0.21719	-0.161731	-0.496284	29.0733	28.2632	28.8394	29.7836	29.8756	29.7115
Cdkn1b	P46414	Cdkn1b	P46414	-0.587	0.113169	-0.786218	-1.11152	-0.808607	-0.0517364	-0.200557	-0.694068	27.4862	28.0922	27.2725	27.4889	27.416	26.9385
Cdkn2aip	Q8BI72	Cdkn2aip	Q8BI72	-3.36	0.00152544	-5.67632	-6.39591	-5.80213	-1.90086	-3.10828	-2.77268	23.5006	24.4459	23.6591	27.5534	26.4888	26.8423
Cdo1	A0A3Q4L347	Cdo1	A0A3Q4L347;P60334;A0A3Q4L374;A0A3Q4EH84	-5.1	0.142885	-7.45174	-6.26958	-6.3435	-7.26291	1.36431	1.12959	23.1376	24.0917	23.2222	28.3902	28.0318	27.9897
Cds1	P98191	Cds1	P98191	-1.62	0.0213731	-2.24302	-2.9953	-1.69549	-0.372556	-0.649714	-1.03848	26.9637	26.4057	27.3848	27.6845	27.685	27.9031
Cds2	Q99L43	Cds2	Q99L43;A2AMQ5;F6S4G2	-1.13	0.0215708	1.70957	2.53376	2.0542	3.03594	3.31101	3.34038	30.614	30.8755	30.5945	31.5215	31.8455	32.1852
Cdv3	Q4VAA2	Cdv3	Q4VAA2;A0A087WNP6;A0A087WS49;A0A087WRM0	-0.103	0.727016	1.55746	1.93057	1.48226	1.6358	1.90015	1.7437	30.598	30.7916	30.6058	29.9225	30.0256	30.2235
Ceacam12	Q9DAS5	Ceacam12	Q9DAS5;Q3V2Q3;Q3UKP4	4.75	0.000790753	-2.08293	-2.54139	-1.4366	-7.44191	-6.81988	-6.03765	26.1953	25.8247	27.0454	23.559	23.9077	24.7731
Cebpzos	Q8BTE5	Cebpzos	Q8BTE5;A0A0A6YXB8	-3.53	0.0958454	-2.26659	-6.88676	-1.59539	0.119824	-0.258134	-0.0218586	24.9546	24.4525	25.3608	26.8985	26.4392	26.9873
Celf1	A0A0R4J0T5	Celf1	A0A0R4J0T5;P28659	-7.63	0.00361529	-3.79363	-6.6123	-2.10952	3.65573	3.30273	3.4156	25.1229	24.3276	26.5646	32.2692	32.1072	31.3028
Celf2	Q9Z0H4	Celf2	Q9Z0H4;S4R2U7;E9QA47;A0A0R4J2B0;S4R1S7	-5.08	0.00219486	-0.8549	-3.33746	-1.43257	3.31854	3.18174	3.11876	27.6248	27.8097	27.5215	31.7545	32.0205	31.3922
Celf2.1	V9GX43	Celf2	V9GX43	-4.97	0.000124882	-6.39547	-6.36216	-6.07358	-0.874954	-1.66177	-1.39413	24.116	23.6895	24.3301	27.8791	27.0029	27.2378
Celf3	A0A0G2JFA4	Celf3	A0A0G2JFA4;A0A0G2JDX3;A0A0G2JGX2;A0A0G2JDL2;A0A0G2JF00	-3.72	0.00046216	-6.07585	-5.1498	-6.03842	-2.008	-1.87267	-2.2161	22.9942	23.8277	24.1106	25.3835	25.4294	25.0532
Celf4	Q7TSY6	Celf4	Q7TSY6	-7.65	0.000638983	-7.18566	-5.20423	-7.9255	1.10254	0.772967	0.757898	24.4209	23.6684	23.68	29.7115	28.8502	28.9138
Celf5	D3Z580	Celf5	D3Z580;D3Z4T1;D3Z4C5;D3Z588	-6.2	0.000682838	-6.95872	-5.20152	-7.35547	-0.13117	-0.39575	-0.377867	23.8804	23.2648	23.9098	27.9984	28.5055	28.113
Celf6	D3YU11	Celf6	D3YU11;Q7TN33;D6RHP1;D3YX51	-7.14	4.94181e-05	-6.75402	-7.11853	-7.12647	-0.0327315	0.0382656	0.409311	24.0344	23.79	23.6642	28.7068	28.6983	28.8346
Celsr2	Q9R0M0	Celsr2	Q9R0M0	-1.78	0.00222298	-4.07825	-3.46911	-3.62516	-1.88925	-1.99782	-1.95629	28.1575	27.8893	28.49	29.6778	29.0092	29.5308
Celsr3	Q91ZI0	Celsr3	Q91ZI0;A0A1L1SUG9	0.225	0.831089	-4.10966	-6.26578	-3.70139	-4.18267	-5.40126	-5.1681	27.9152	26.6676	28.1516	26.9422	26.4029	26.5001
Cemip	Q8BI06	Cemip	Q8BI06	2.3	0.00305962	-0.569113	-0.172928	-0.812843	-2.43819	-3.33329	-2.6697	30.007	30.0262	30.0017	29.3074	28.6978	28.7263
Cemip2	Q5FWI3	Cemip2	Q5FWI3	-0.568	0.2096	-6.49655	-6.58085	-7.50116	-6.39213	-6.31834	-6.16444	NA	NA	NA	NA	NA	NA
Cend1	Q9JKC6	Cend1	Q9JKC6	-2.12	0.00892759	3.3085	3.49821	2.70393	4.66851	5.28595	5.9173	30.8275	31.0197	30.602	32.246	32.319	32.4869
Cenpv	Q9CXS4	Cenpv	Q9CXS4	-7.7	0.0269435	-6.94418	0.138811	-6.9589	2.82634	3.36919	3.14289	24.5395	28.6302	23.1471	30.9794	31.5466	31.6574
Cep104	Q80V31	Cep104	Q80V31	4.03	0.0729232	-1.2426	-1.06389	-0.706799	-1.62154	-6.83344	-6.65997	29.1378	29.0857	29.8246	28.8317	23.9944	23.4442
Cep131	B1AXI9	Cep131	B1AXI9;J3QMP9;Q62036	-0.81	0.711537	-7.62429	-2.12872	-7.89879	-4.77674	-5.26889	-5.17725	23.4263	24.2933	23.5217	25.7458	25.0343	25.2366
Cep170.1	Q6A065	Cep170;Plin5	Q6A065;H7BX26	0.452	0.201515	0.684059	1.36537	1.14097	0.415868	0.709155	0.710255	31.9176	32.1346	32.2559	31.4909	31.5383	31.5377
Cep170b	B9EIX2	Cep170b	B9EIX2;Q80U49	0.439	0.153032	-0.00248713	-0.387182	-0.383815	-0.818603	-0.754621	-0.517482	31.0783	30.8127	31.0414	30.4021	30.276	30.5229
Cep290	E9Q9M0	Cep290	E9Q9M0;Q6A078	0.86	0.0505751	-3.45147	-4.20699	-3.92627	-4.66419	-4.96523	-4.53417	28.2703	27.7909	27.9379	27.233	26.6857	26.9998
Cep41	H9KUZ8	Cep41	H9KUZ8;Q99NF3	2.4	0.46004	0.244012	-7.13464	0.514922	-5.9946	-1.91674	-5.6624	28.7186	24.1102	28.6972	23.7639	28.2597	23.1131
Cep55	Q8BT07	Cep55	Q8BT07	-0.178	0.845342	-7.10711	-6.15225	-4.56889	-5.46916	-5.85806	-5.96561	23.5217	23.2402	24.9768	23.9729	23.4947	24.4302
Cept1	Q8BGS7	Cept1	Q8BGS7;A0A0A6YXR0	-0.863	0.0756515	-2.32305	-2.47828	-2.15465	-1.54972	-0.890919	-1.92624	24.0537	23.6538	24.4614	26.8744	26.4893	26.3306
Cers1	P27545	Cers1	P27545	-0.942	0.0371392	0.347355	0.0772282	0.826941	1.49973	1.45906	1.11751	28.9512	28.4901	29.3882	29.0563	29.2663	29.3693
Cers4	Q9D6J1	Cers4	Q9D6J1;H3BL50	-4.24	0.00354036	-7.66425	-6.37896	-6.01552	-3.31637	-1.5799	-2.44657	23.6908	23.87	24.2503	25.6572	26.8094	26.2335
Cers6	H3BL08	Cers6	H3BL08;Q8C172	-2.64	0.000627253	-2.22781	-1.8727	-1.89826	0.987991	0.481912	0.443441	26.7733	26.9767	27.1045	29.3256	28.7968	28.8612
Cetn2	Z4YJH1	Cetn2;Cetn1	Z4YJH1;Q9R1K9;B1AUQ7	0.396	0.177446	0.801351	0.823265	0.934663	0.249421	0.716264	0.406507	29.2926	28.3411	28.8981	28.1202	27.9386	27.2804
Cfap157	Q0VFX2	Cfap157	Q0VFX2	-2.2	0.431526	-2.82603	-6.0216	-7.10416	-7.16771	-0.417872	-1.7696	26.8492	23.8762	24.9916	24.5997	28.9349	27.5504
Cfap20	Q8BTU1	Cfap20	Q8BTU1	-5.09	0.0479275	-1.07676	-6.57701	-6.75762	0.641346	-0.0254026	0.237057	27.9136	24.5531	24.6518	28.5795	28.0027	28.2609
Cfap36	Q8C6E0	Cfap36	Q8C6E0	0.2	0.698738	-0.148458	0.540329	0.499702	-0.567188	0.412248	0.445179	28.7779	29.3504	29.2736	28.6615	28.8682	28.9919
Cfap410	Q8C6G1	Cfap410	Q8C6G1;Q3U699	-0.975	0.509676	-2.30256	-5.89157	-6.16533	-3.7945	-4.30348	-3.33527	23.4155	24.4595	23.9201	24.8112	24.2129	24.2542
Cfap58	B2RW38	Cfap58	B2RW38	2.17	0.0115932	-4.80757	-4.53307	-4.89701	-6.93416	-7.72837	-6.09407	25.6537	25.6453	25.4346	23.7696	24.398	23.6667
Cfap65	Q3V0B4	Cfap65	Q3V0B4	6.32	0.00054542	-0.305801	1.52511	0.915421	-4.96764	-6.129	-5.72307	31.4526	33.0007	29.9841	25.993	25.1592	24.12
Cfap74	G3UWF6	Cfap74	G3UWF6;Q3UY96	0.354	0.908781	-1.85282	-7.0128	-2.21121	-5.6942	-0.0206608	-6.42435	25.4656	23.9054	25.2217	23.9009	27.3895	24.2081
Cfdp1	O88271	Cfdp1	O88271	-7.24	9.17543e-05	-7.35542	-6.262	-6.83054	0.071055	0.5141	0.672703	24.5357	23.2611	23.2252	28.7975	28.4396	28.6819
Cfl1	P18760	Cfl1	P18760;F8WGL3;A0A494B9A7	0.146	0.576999	7.70676	7.99144	7.64652	7.60904	7.69357	7.60275	35.7578	35.9477	35.3733	35.4027	35.6574	35.5252
Cfl2	P45591	Cfl2	P45591	-0.427	0.14502	4.25243	4.17707	3.96541	4.35407	4.62142	4.70126	32.5222	32.0627	32.3022	32.2158	32.6418	32.4969
Champ1	A0A140T8S5	Champ1	A0A140T8S5;Q8K327	-4.52	0.0024346	-5.21474	-7.10823	-6.86356	-1.24482	-2.37894	-2.01496	26.8323	24.0873	23.3625	28.3944	28.0723	28.8406
Chchd1	Q05BF0	Chchd1	Q05BF0;Q9CQA6	-5.03	0.0481489	-7.14479	-7.00194	-1.6698	0.0717563	0.333092	-1.12631	24.4809	23.5034	25.5724	25.8811	25.8016	25.7312
Chchd3	D3Z0L4	Chchd3	D3Z0L4;Q9D9P1	-2.12	0.0306451	-2.52858	-1.17485	-2.4875	-0.820275	0.80944	0.180892	25.8737	26.9447	25.7852	27.3488	28.8892	28.2278
Chchd3.1	Q9CRB9	Chchd3	Q9CRB9	-1.73	0.0612019	-1.07481	0.65942	-1.43271	0.803745	1.18625	1.34635	27.4398	28.5355	27.8544	28.7914	29.2703	29.3844
Chchd4	Q8VEA4	Chchd4	Q8VEA4	-2	0.0158829	0.650225	0.296331	-0.738342	1.65565	2.01898	2.54687	27.998	27.5587	26.5731	28.2877	28.8213	29.265
Chchd5	Q9CQP3	Chchd5	Q9CQP3	-5.1	7.67082e-05	-7.29883	-7.28486	-7.05614	-1.92891	-1.97837	-2.43746	NA	NA	NA	NA	NA	NA
Chchd6	E9Q4M4	Chchd6	E9Q4M4	-0.269	0.844146	-5.95723	-4.02698	-5.08597	-6.75187	-3.63173	-3.87913	24.3466	24.2079	23.5378	24.19	24.5635	24.2833
Chchd6.1	Q91VN4	Chchd6	Q91VN4	-3.6	0.16208	-2.48722	-0.954475	-7.95578	-0.595221	0.0916692	-0.09014	27.5901	27.49	23.5891	27.418	27.5282	27.6658
Chchd7	Q3TFT3	Chchd7	Q3TFT3;B1AXC7;B1AXC5;B1AXC8;Q8K2Q5	-1.74	0.0204265	-0.705379	-1.72184	-1.01483	-0.0238214	1.14136	0.667589	25.7338	25.7916	25.4371	26.6913	26.9344	25.8736
Chd2	E9PZM4	Chd2;Chd1	E9PZM4	-1.85	0.0139773	-6.97578	-6.50214	-7.00095	-4.61641	-5.76279	-4.54948	23.6648	24.4225	24.7454	26.6395	25.4038	25.6258
Chd3	B1AR17	Chd3	B1AR17;F7C528;E9Q614	-3.78	0.00461489	-5.76773	-3.75705	-5.71634	-1.56449	-1.30594	-1.04406	23.6882	26.8554	23.5899	29.1894	30.1582	29.6872
Chd4	E9QAS4	Chd4	E9QAS4;E9QAS5;Q6PDQ2	-6.46	6.86503e-05	-7.21645	-6.47673	-6.7666	-0.322334	-0.550593	-0.20229	23.6162	24.1727	23.8892	30.8758	30.4729	30.5332
Chd5	E9PYU4	Chd5;Chd3	E9PYU4;E9PYL1;A2A8L1	-2.83	0.00263913	-6.57402	-6.08744	-5.26253	-3.42728	-2.98607	-3.01422	23.3469	24.4319	27.3406	28.0293	27.5235	27.3562
Cherp	A0A1D5RL92	Cherp	A0A1D5RL92;Q8CGZ0;G5E8I8	-6.32	7.04116e-05	-5.61116	-6.35558	-6.33449	0.205181	0.181802	0.2682	25.4494	24.7118	23.946	28.6789	30.0525	30.0632
Chga	P26339	Chga	P26339	0.00331	0.994806	-1.09969	-1.23932	-0.0618462	-0.230714	-1.19117	-0.98891	28.353	28.0698	28.742	28.3164	27.6248	27.2534
Chgb	P16014	Chgb	P16014	0.782	0.109339	1.21079	0.544595	1.64357	0.501641	0.406104	0.144138	31.3531	30.5636	31.5879	30.545	30.3113	29.9756
Chid1	A0A0R4J058	Chid1	A0A0R4J058;A0A0R4J242;Q922Q9;A0A1B0GSH5;D3YWG2;G8JL55	-5.38	0.0438006	-0.589235	-5.73191	-6.81689	1.19177	1.01639	0.786323	28.3095	24.0674	23.402	29.6095	29.2795	29.316
Chka	O54804	Chka	O54804;F6S062;F7AYX1;Q5J2U5	-0.749	0.701142	-5.11776	-7.53575	-4.98434	-5.73338	-2.36573	-7.29153	NA	NA	NA	NA	NA	NA
Chkb	O55229	Chkb;Gm44502	O55229	1.07	0.00792672	0.66264	0.356587	0.682972	-0.540404	-0.40177	-0.564688	29.783	29.5733	29.632	28.7613	28.5763	28.4886
Chl1	P70232	Chl1	P70232	0.81	0.0371398	1.97122	2.23227	2.5239	1.4541	1.24402	1.59831	32.6595	32.5619	32.8605	31.7695	31.6136	31.8459
Chm	A2AD03	Chm	A2AD03;Q9QXG2;Q3UR39	1.04	0.101144	0.223428	0.135189	0.158944	-1.78871	-0.505999	-0.310208	29.7853	29.4129	29.9589	28.7264	29.1233	29.0955
Chml	A0A0R4J1A1	Chml	A0A0R4J1A1;Q9QZD5	0.666	0.139607	-4.41807	-5.45646	-5.19028	-5.72917	-5.66528	-5.66937	24.695	24.435	25.0337	24.3234	24.3107	24.2923
Chmp1a	Q921W0	Chmp1a	Q921W0	-0.522	0.0782114	1.92673	1.86204	1.97119	2.6518	2.29471	2.38054	30.0338	29.6661	30.1076	30.3447	29.8608	29.6855
Chmp1b2	Q9CQD4	Chmp1b2;Chmp1b1	Q9CQD4;Q99LU0	-0.734	0.488231	1.90396	1.06606	-0.404275	2.11826	2.25426	0.394784	29.6886	28.7651	27.7259	29.2209	29.3951	29.1588
Chmp2a	Q9DB34	Chmp2a	Q9DB34;A0A1B0GT75;A0A1B0GR63	-1.81	0.0134501	-0.555064	-1.40465	-0.101322	1.41107	0.902827	1.06819	27.8105	27.5786	28.107	28.9417	28.1634	28.2482
Chmp2b	A0A338P7L8	Chmp2b	A0A338P7L8;Q8BJF9	1.13	0.417711	0.936837	-0.923326	-2.89039	-2.05043	-2.89692	-1.3144	NA	NA	NA	NA	NA	NA
Chmp3	Q9CQ10	Chmp3	Q9CQ10;A0A0N4SVS3	-0.623	0.100918	0.766176	0.10292	0.448543	1.06937	1.2668	0.849288	28.4956	27.844	28.6648	28.4058	28.2431	28.2768
Chmp4b	Q9D8B3	Chmp4b;Chmp4c	Q9D8B3	0.456	0.0891918	4.08117	3.97014	4.04881	3.60982	3.46701	3.6555	32.7491	32.4156	32.2556	31.9909	31.955	31.8307
Chmp5	Q9D7S9	Chmp5	Q9D7S9	1.39	0.206277	0.666335	3.50519	2.01926	1.13176	1.01729	-0.135754	29.8695	29.6208	29.2013	28.1747	28.3457	28.0112
Chmp6	P0C0A3	Chmp6	P0C0A3;B1AZ42	0.151	0.753618	0.937296	1.76613	0.890468	0.607524	1.36235	1.17123	29.1373	29.2391	28.6106	28.4915	28.3801	28.4368
Chmp7	Q8R1T1	Chmp7	Q8R1T1	-0.0395	0.920884	1.11078	0.855113	1.10358	1.17282	1.45073	0.564468	30.2402	29.9441	30.2472	29.8306	29.5191	29.5532
Chn1	Q91V57	Chn1	Q91V57;A7VK13	0.0688	0.893366	-0.177413	0.181437	-0.442312	-0.884833	0.255202	-0.0150959	29.8217	29.1566	29.0215	29.0201	29.2049	28.8339
Chn2	Q3V2R3	Chn2	Q3V2R3	1.02	0.40197	-2.42115	-1.79449	-2.75304	-5.29479	-2.0044	-2.71961	26.9956	27.0881	26.6941	26.496	26.6321	26.2657
Chordc1	Q9D1P4	Chordc1	Q9D1P4;A0A1L1SU22;A0A1L1STZ1	0.206	0.595177	2.09163	2.28269	2.91799	2.17102	2.4292	2.07329	30.9105	30.9101	31.2145	30.6784	30.8314	30.6096
Chp1	B0R091	Chp1	B0R091;P61022	-0.8	0.0585189	1.04533	0.372302	1.13997	1.58466	1.6381	1.73568	29.2831	28.9992	29.1522	29.5488	29.4585	29.5285
Chpf	Q6IQX7	Chpf	Q6IQX7	-2.3	0.376545	-8.03446	-1.30879	-1.21942	-1.12037	-1.24188	-1.29098	24.1532	28.7645	28.9465	28.8695	28.8203	28.4585
Chrd	A2CG33	Chrd	A2CG33	-5.23	0.022228	-2.78237	-6.81921	-1.92132	1.56143	1.37107	1.2375	26.6199	23.1393	27.3514	30.7305	30.4508	30.2845
Chrm1	P12657	Chrm1	P12657	0.113	0.821547	0.579262	-0.624256	-0.24015	-0.0411191	-0.0959167	-0.487872	28.6431	26.915	27.916	27.9482	27.5146	27.6381
Chrm3	Q9ERZ3	Chrm3	Q9ERZ3	-1.02	0.0237173	-2.14173	-1.74001	-2.28593	-0.729277	-1.19717	-1.19503	26.6473	26.9393	26.9008	27.1314	27.0512	26.9098
Chrm4	P32211	Chrm4	P32211	1.69	0.267691	-3.67569	-2.6801	-3.09313	-6.20312	-6.0116	-2.30607	24.7266	25.4394	25.1796	23.7537	23.9292	25.7409
Chrna4	B7ZBV1	Chrna4	B7ZBV1;B7ZBU7;O70174	5.58	0.000340943	-1.38535	-0.00361538	-0.590116	-6.35044	-5.75165	-6.6056	25.7539	26.8528	26.4196	23.5489	24.5184	24.2289
Chst14	A2AQV2	Chst14	A2AQV2;Q80V53	4.04	0.0159955	-2.93287	0.0627606	-3.0891	-5.57015	-6.31237	-6.19824	25.8844	28.5973	25.5986	23.6661	24.2202	24.4928
Chst2	Q80WV3	Chst2	Q80WV3	-2.53	0.0041599	-5.71869	-5.83725	-6.44671	-2.81334	-3.58026	-4.00585	24.0975	23.2086	24.6173	26.4541	25.9134	25.455
Chtf18	F6ZBE7	Chtf18	F6ZBE7;A0A0R4J0I4;E9PVJ3;Q8BIW9	1.04	0.165279	0.604195	-1.32733	-0.530634	-1.08898	-1.68631	-1.58865	28.7623	25.548	27.3269	26.8304	26.3155	26.2142
Chtop	E9PW20	Chtop	E9PW20;Q9CY57;D3YZA1;D3Z7T7	-9.6	6.70505e-05	-7.77293	-6.64234	-6.6327	2.46545	2.42633	2.87397	24.0483	23.8587	24.3101	30.0394	30.2218	30.5115
Ciao1	Q99KN2	Ciao1	Q99KN2;G3UYR5	-1.08	0.257716	-1.07656	0.435076	-1.67358	-0.635754	1.03278	0.53765	28.2046	28.9097	27.8931	28.3231	29.179	29.1653
Ciao2b	Q9D187	Ciao2b	Q9D187	-0.697	0.395039	-2.36562	-1.70135	-0.317508	-0.407221	-1.41612	-0.468785	26.8926	26.0643	26.1092	26.6091	25.6221	25.722
Ciao3	Q7TMW6	Ciao3	Q7TMW6	0.799	0.111387	-4.37906	-3.55319	-3.54999	-4.72024	-4.21428	-4.94508	25.2094	25.7524	25.9089	24.6171	24.9504	24.288
Ciapin1	F8WIK0	Ciapin1	F8WIK0;Q8WTY4;F7BWP1	0.409	0.276529	2.92628	2.76726	2.88052	1.94846	2.65537	2.74178	31.6379	31.9017	31.7101	31.0828	31.0919	31.1517
Cic	E9Q6T8	Cic	E9Q6T8;E9QP01;Q924A2	-2.8	0.0245622	-6.33445	-4.41192	-6.82522	-3.76114	-2.67906	-2.7285	24.9877	26.1935	23.5154	26.723	26.7434	26.8056
Cirbp	P60824	Cirbp	P60824;K4DI65;D3YU80	-7.81	0.00170327	-3.1575	-6.6901	-6.13427	2.32434	2.44692	2.68813	26.7502	24.3924	24.6878	30.4709	30.2533	30.0566
Cisd1	Q91WS0	Cisd1	Q91WS0	-1.23	0.0153077	3.82315	4.24123	3.40373	4.98878	5.19923	4.97919	31.5498	31.8656	30.8846	32.0288	31.8059	31.8658
Cisd2	Q9CQB5	Cisd2	Q9CQB5;D3Z3X4	-1.04	0.0209874	0.534514	0.170533	0.351393	1.70599	1.03916	1.42602	28.4159	27.9676	28.2375	29.3081	28.6611	28.9303
Cisd3	Z4YKM2	Cisd3	Z4YKM2;B2RWE3;B1AR13	-5.65	0.00110546	-6.89889	-7.74689	-7.21088	-2.92344	-0.846715	-1.14526	23.6501	24.1049	24.3111	25.4022	26.5392	26.1294
Cit	E9QL53	Cit	E9QL53;D3YU89;P49025;F6SBR5;D3Z1U0	-2.07	0.0912735	-3.98219	-3.1211	-4.85449	-0.313411	-2.85675	-2.56648	29.5465	28.6374	27.5896	30.6196	29.0335	29.1324
Ckap4	Q8BMK4	Ckap4	Q8BMK4	-10	4.94181e-05	-6.40901	-6.42933	-7.24023	3.2798	3.41025	3.34227	24.0574	23.723	23.9668	32.928	33.0039	32.9011
Ckap5	A0A0R4J0K2	Ckap5	A0A0R4J0K2;K3W4R5;A2AGT5;Z4YL78	0.434	0.0950375	2.70385	2.64227	2.66985	2.15441	2.25454	2.30374	34.0376	33.902	34.0695	33.5831	33.6091	33.609
Ckb	Q04447	Ckb	Q04447	0.197	0.439885	6.99554	7.28671	7.18885	6.8677	7.00218	7.00947	35.4487	36.1526	35.873	35.4482	35.6506	35.7498
Ckmt1	P30275	Ckmt1;Ckmt2	P30275;A2ARP5	-1.13	0.0112865	4.16446	4.72628	4.59857	5.54544	5.58103	5.75775	33.2789	33.8258	33.7501	34.3125	34.3909	34.6666
Clasp1	A0A087WQ31	Clasp1	A0A087WQ31;E9QKH0;A0A087WS18;A0A087WQ95;A0A087WNW8;A0A087WRK0;A0A087WRE8;Q80TV8;E9Q6L0;J3QP81;A0A087WQF1;A0A087WP42;E9QNY9;A0A0A6YXZ1	-0.169	0.51285	0.969751	1.05644	0.792199	1.17274	1.17715	0.974766	32.2287	32.2016	31.9694	32.1574	32.1182	32.2634
Clasp2.1	Q08EB5	Clasp2	Q08EB5	0.95	0.490865	-4.85155	-2.33403	-4.66665	-4.83714	-3.43394	-6.43082	26.1946	28.4293	26.2499	25.9758	27.2896	24.0285
Clasp2.2	Q08EB6	Clasp2	Q08EB6;E9Q8N5;Q8BRT1	-0.0804	0.934385	-6.17315	-5.02638	-7.17229	-7.02489	-5.18663	-5.91898	24.3236	25.7176	23.9988	23.7687	25.5176	24.1095
Clcc1	A2AEM2	Clcc1	A2AEM2;Q99LI2	-2.85	0.182339	-1.0873	-6.84283	-2.99331	-1.93453	-0.309967	-0.122103	27.3829	23.9648	26.9428	27.6739	29.4881	28.7835
Clcn3	P51791	Clcn3	P51791;Q8K4W8;Q3TF45;E9Q2I1	-0.955	0.0543984	-0.540157	-1.45295	-0.58772	0.00191772	0.00716694	0.275343	29.1478	29.3603	29.365	29.5858	29.4161	29.4272
Clcn4	Q61418	Clcn4	Q61418;Q3LRV6;A0A1B0GT29	-0.954	0.0616571	0.238852	-0.834667	-0.424478	0.423345	0.76309	0.654328	29.7006	29.3611	29.5231	30.0797	29.7498	29.6041
Clcn5	B1ATV0	Clcn5	B1ATV0;Q9WVD4	-2.35	0.139162	-4.45966	-6.38806	-6.47899	-4.953	-4.05675	-1.26092	24.0731	23.7151	23.8469	25.8173	26.7928	27.5223
Clcn6	O35454	Clcn6	O35454;A2A7F6;E9Q741	-0.748	0.0218042	0.807219	0.694099	0.932834	1.6151	1.59508	1.46786	30.9752	30.8942	31.1374	31.2794	31.0312	30.7978
Clcn7	E9PYL4	Clcn7	E9PYL4;F6SUM2;O70496	-3.63	0.0370368	-3.17058	-6.20526	-7.14712	-1.46427	-2.18071	-1.99444	26.2229	23.471	23.0498	27.2934	26.8902	26.5906
Cldn12	Q9ET43	Cldn12	Q9ET43	-4.16	0.0209455	-3.5571	-6.29202	-7.04653	-2.42522	-1.28918	-0.70406	24.8103	23.7274	23.59	25.1424	25.4143	26.1633
Cldnd1	Q9CQX5	Cldnd1	Q9CQX5;E0CY66;E0CY63	1.56	0.174707	-0.297081	-1.85389	-1.10083	-2.20315	-4.26096	-1.48174	26.8221	26.4187	26.5613	25.8868	25.7234	26.5806
Clec10a	B1AU03	Clec10a	B1AU03	0.895	0.8101	-0.374994	-0.563589	-7.29804	-6.28946	-5.39854	0.767408	27.0786	26.948	24.0038	24.8034	24.2813	27.5773
Clec16a	Q80U30	Clec16a	Q80U30;H7BXB6;Z4YLG3	-0.112	0.71379	-0.970149	-0.935664	-0.602	-0.510504	-0.947355	-0.714179	29.3962	29.4616	29.7902	28.8881	28.8686	28.5828
Clec2l	P0C7M9	Clec2l	P0C7M9	-2.03	0.0381562	-0.34549	-2.58457	-1.50716	0.338919	0.889822	0.426697	28.3079	27.0389	27.99	28.5855	28.4905	28.3781
Clic1	Q9Z1Q5	Clic1	Q9Z1Q5	-1.97	0.108034	-2.57563	-5.66203	-3.24987	-2.26843	-1.81707	-1.47709	26.0213	24.3869	25.8087	26.7925	26.5993	26.1731
Clic4	Q9QYB1	Clic4	Q9QYB1	-1.28	0.0110323	-1.48536	-1.9728	-1.32386	-0.377744	-0.0784055	-0.482809	27.1533	27.2951	27.5947	27.7496	28.2649	27.7299
Clint1	Q5SUH7	Clint1	Q5SUH7;Q5SUH6;Q99KN9	-1.34	0.0131501	-0.232476	0.563259	-0.0167517	1.25394	1.6825	1.40043	29.3041	29.4631	29.4512	30.4597	30.3209	30.2843
Clip1	D3Z3M7	Clip1	D3Z3M7;D3Z2Z1;F8WIA1;Q922J3;F6RCU2;Q8C0S5	-0.289	0.372977	0.194465	0.51599	-0.16644	0.513611	0.473256	0.424315	31.3182	31.3299	31.1182	31.245	31.2605	31.1448
Clip2	Q9Z0H8	Clip2	Q9Z0H8	0.735	0.0456209	2.73445	3.13341	2.63081	1.97405	2.27452	2.04408	33.4828	33.3765	33.1422	32.5657	33.0294	32.7962
Clip3	B9EHT4	Clip3	B9EHT4	0.62	0.140304	-0.570127	-0.538383	-0.777268	-0.70505	-1.5137	-1.52732	29.1599	28.9558	28.8416	28.6682	28.546	28.715
Clip4	A0A2R8VI93	Clip4	A0A2R8VI93;A0A2R8VHV0;Q3TTL7;A0A2R8VJW4;Q8CI96;A0A2R8VI14;A0A2R8VHQ7;A0A2R8W6I5	-2.37	0.0153732	-5.34357	-6.11663	-6.76431	-3.27744	-3.28999	-4.54412	23.9049	24.0031	23.946	25.5606	25.4718	24.8387
Clmp	Q8R373	Clmp	Q8R373	1.39	0.148811	-2.80381	-0.390381	-1.17326	-3.4157	-2.67102	-2.44295	26.436	28.1555	27.1832	26.3504	27.0058	26.4853
Cln6	D6RE34	Cln6	D6RE34;Q3U466	-6.35	0.000385562	-7.67161	-6.65014	-5.81919	-0.763417	-0.138041	-0.20185	23.457	23.3971	24.3343	24.9178	25.3968	25.1376
Clns1a	Q923F1	Clns1a	Q923F1;Q61189	-0.262	0.602639	0.309661	0.777006	0.75325	1.55583	0.735306	0.335969	29.2889	28.8029	28.8982	28.3087	27.4074	27.9637
Clpb	Q8CCN6	Clpb	Q8CCN6;Q60649;E9PY58	-2.09	0.00472888	-1.97751	-3.00712	-2.06824	-0.398361	-0.278677	-0.0964464	28.3295	26.8127	28.0759	29.1822	29.3866	29.0972
Clpp	O88696	Clpp	O88696	-1.43	0.136979	1.39569	-0.577072	1.56944	2.61419	1.57752	2.47457	30.6012	28.4506	29.6728	30.7235	30.3736	30.4418
Clptm1	Q8VBZ3	Clptm1	Q8VBZ3	-1.02	0.0358115	0.941215	1.35526	1.5178	2.72214	2.05578	2.08367	30.6271	30.744	30.847	31.677	31.5192	31.2884
Clptm1l	Q8BXA5	Clptm1l	Q8BXA5	-3.54	0.000312616	-3.88188	-4.41498	-3.83112	-0.801684	-0.455773	-0.245334	25.6649	25.1845	25.7515	28.4178	28.0977	29.1877
Clpx	Q6P8N8	Clpx	Q6P8N8;Q9JHS4	-4.64	0.000720506	-4.74971	-5.67331	-3.98796	-0.0861125	-0.191979	-0.227718	24.4112	23.5316	24.9697	29.9143	29.5082	29.4207
Clstn1	Q9EPL2	Clstn1	Q9EPL2	1.09	0.0846356	-0.321022	0.871139	0.762367	-0.647688	-1.07997	-0.23343	29.7665	30.4049	30.4749	29.579	29.2024	29.3918
Clstn2	Q9ER65	Clstn2	Q9ER65	0.967	0.264989	-5.61728	-3.25566	-3.76033	-5.30571	-5.12406	-5.10343	25.3317	26.2093	26.0098	25.4464	25.0449	25.4506
Clstn3	D3Z601	Clstn3	D3Z601;Q99JH7	-0.164	0.569707	-0.278258	-0.126453	0.0208603	-0.186478	0.245322	0.0490619	30.0046	29.5008	30.1354	29.4297	29.3507	29.3167
Clta	B1AWD8	Clta	B1AWD8;O08585;B1AWD9;B1AWE0;Q6PFA2;B1AWE1	-0.246	0.562672	5.48775	5.80691	5.39823	5.35847	6.34082	5.73195	33.0356	33.0394	32.8115	33.0513	33.4273	33.2757
Cltb	Q6IRU5	Cltb	Q6IRU5;F7BHJ0	-0.611	0.115243	4.49904	4.40896	3.74972	4.88133	4.74188	4.86832	32.2294	31.9315	31.6096	32.5261	32.7799	32.5084
Cltc	Q5SXR6	Cltc	Q5SXR6;Q68FD5	0.222	0.381355	6.55256	6.83862	6.78841	6.48878	6.47316	6.55264	37.6951	37.9396	37.7945	37.5513	37.5929	37.5725
Clu	Q06890	Clu	Q06890;E9PUU2;E9PXG5;E9Q8Y5;E9Q9B8	-0.142	0.679716	2.25501	2.02009	2.70227	2.63907	2.42664	2.33674	31.1199	31.1232	31.7578	31.1854	31.173	31.1232
Cluap1	D3Z1F2	Cluap1;Gm20695	D3Z1F2;E9Q8M4;H3BLK7;Q8R3P7	-1.32	0.0869237	-6.28223	-6.71715	-5.33383	-4.29101	-4.52125	-5.57339	24.1832	23.6058	22.9357	23.8248	23.2456	23.5381
Cluh	A0A0R4J140	Cluh	A0A0R4J140;Q5SW19;Z4YLI8	-2.62	0.00603591	-2.2688	-2.82975	-3.92167	-0.311886	-0.477111	-0.36424	29.1972	27.6604	27.3207	30.3826	29.9836	30.2905
Clvs1	Q9D4C9	Clvs1	Q9D4C9	0.101	0.733325	0.662917	0.193607	0.375083	0.412287	0.138294	0.37674	28.6653	29.181	29.297	29.4567	29.313	29.3537
Clvs2	Q8BG92	Clvs2	Q8BG92;A0A1W2P7U8	0.51	0.0962452	0.123178	0.414626	0.298308	-0.203469	-0.0594939	-0.431587	29.2562	29.106	28.8973	28.5915	28.2045	28.053
Clybl	Q8R4N0	Clybl	Q8R4N0	-2.13	0.020593	-1.65733	-3.19129	-1.37253	0.229208	0.0297727	-0.0916584	27.5133	27.4568	27.8072	29.2442	28.912	28.8892
Cmas	A0A0R4J0B4	Cmas	A0A0R4J0B4;Q99KK2	-8.1	0.00198556	-4.24524	-4.16829	-7.75658	2.40552	2.85083	2.86665	24.5277	26.458	24.127	32.0304	31.4665	31.6886
Cmc1	Q9CPZ8	Cmc1	Q9CPZ8	-5.1	0.0648379	-0.605478	-1.72802	-7.34035	1.74063	1.89997	1.98978	27.6522	27.0376	24.5154	27.797	28.2257	27.9952
Cmip	Q9D486	Cmip	Q9D486	-1.15	0.00617464	-0.819935	-0.578102	-0.616581	0.557975	0.296409	0.58353	29.2811	29.6619	29.5862	29.5325	29.445	29.7071
Cmpk1	Q9DBP5	Cmpk1	Q9DBP5;A0A0R4J093	0.517	0.105841	5.39477	5.593	5.10597	4.91091	4.70335	4.92882	33.3605	33.356	33.451	32.8244	33.0559	32.9824
Cmpk2	Q3U5Q7	Cmpk2	Q3U5Q7	-1.14	0.0262358	-1.16472	-1.84575	-1.04908	-0.398962	0.0601998	-0.305345	28.298	28.2141	28.6417	28.5336	28.4472	28.5021
Cmtm4	Q8CJ61	Cmtm4	Q8CJ61	-1.37	0.0197969	0.391438	-0.125063	0.115729	0.911688	1.76522	1.82672	27.3763	26.2968	26.9711	27.597	27.2776	27.1219
Cmtr1	Q9DBC3	Cmtr1;Gm28043	Q9DBC3;A0A3Q4EHZ1	-1.33	0.0329745	-1.80649	-2.66689	-2.72576	-1.56138	-0.755471	-0.897328	28.8238	27.6806	27.775	28.7765	29.2042	28.9406
Cnbd2	A2AV96	Cnbd2	A2AV96;Q9D5U8	1.22	0.318263	-5.2046	-3.26074	-5.71342	-4.50291	-6.5675	-6.76087	25.0748	25.9052	23.7444	25.309	24.1857	23.9975
Cnbp	P53996	Cnbp	P53996;A0A0N4SVS6	-1.19	0.212867	-1.31336	0.796795	-0.792407	-0.169568	1.31321	1.10852	27.731	28.915	28.2353	28.6705	29.2333	28.9122
Cndp2	Q9D1A2	Cndp2	Q9D1A2	0.374	0.218506	3.54121	3.94836	3.87507	3.43658	3.58462	3.22187	33.1303	33.1713	33.1166	32.4974	32.5011	32.4698
Cnih1	D6RGU4	Cnih1	D6RGU4;O35372	-8.21	0.00013068	-6.0978	-6.79206	-6.74584	0.767782	2.01641	2.2209	24.1891	23.9355	24.2405	27.6202	27.8958	28.0741
Cnih2	A0A494B9S6	Cnih2	A0A494B9S6;O35089	-0.949	0.815849	-0.841984	-6.14233	0.273355	2.06189	-6.985	1.05933	25.1809	24.4233	25.6738	27.8863	24.9812	25.9539
Cnih3	G3XA11	Cnih3	G3XA11;Q9D6E1;A0A1B0GSP1;Q6ZWS4	0.245	0.82672	2.84311	0.775579	1.09134	1.91228	2.09434	-0.0306764	27.4356	25.8564	26.4591	26.471	25.8041	23.9189
Cnih4	A0A0A6YW87	Cnih4	A0A0A6YW87;Q9CX13	-4.13	0.084515	-0.623333	-6.02163	-0.274607	1.70567	1.83408	1.94153	25.7789	24.0325	25.9981	27.7319	27.9138	27.9885
Cnksr2	Q80YA9	Cnksr2;Cnksr3	Q80YA9;A2AI78	-0.865	0.0516946	0.553126	-0.218292	-0.124943	0.79283	0.900149	1.11144	31.124	30.4173	30.7389	30.8275	30.5847	30.7441
Cnn3	Q9DAW9	Cnn3	Q9DAW9;A0A0G2JDV8	-4.57	0.0209275	-6.4145	-2.75179	-2.34522	0.762972	0.774872	0.674142	24.1947	26.5634	26.9393	29.0726	29.0485	29.1272
Cnnm1	A0A286YDL2	Cnnm1	A0A286YDL2;Q0GA42	0.511	0.611391	-7.47532	-6.04496	-4.66326	-7.0744	-6.37137	-6.2706	NA	NA	NA	NA	NA	NA
Cnnm2	Q3TWN3	Cnnm2	Q3TWN3	-0.878	0.305873	-3.5036	-5.70578	-5.2964	-3.7715	-3.68036	-4.42087	26.2075	25.6424	26.0772	25.6991	26.1459	25.6922
Cnnm4	Q69ZF7	Cnnm4	Q69ZF7	-1.23	0.472291	-2.1873	-6.82878	-2.64428	-2.57599	-2.72865	-2.66619	27.9623	24.2696	27.3569	27.2196	26.7205	27.1096
Cnot1	Q6ZQ08	Cnot1	Q6ZQ08;A0A1D5RMJ8;B7ZWL1;A0A1D5RMD8	-2.83	0.000567991	-2.30743	-3.03976	-2.49195	0.255783	0.278058	0.113094	29.8642	28.4868	29.165	31.7828	31.6915	31.2775
Cnot10	Q8BH15	Cnot10	Q8BH15;A0A1L1SQA7;A0A1L1SS47;A0A1L1SQF2	-3.78	0.00611852	-3.57066	-5.8753	-5.39568	-1.6095	-0.941024	-0.961091	26.4487	23.1473	25.3928	28.4787	28.7118	28.4482
Cnot11	Q9CWN7	Cnot11	Q9CWN7	-5.08	0.00262778	-7.40386	-5.72142	-4.70594	-0.962023	-0.730523	-0.901545	23.7614	23.7114	24.9388	28.4092	28.4967	28.0979
Cnot2	E9Q027	Cnot2	E9Q027;Q8C5L3;E9Q8D5	-3.81	0.0456458	-6.80343	-3.67568	-2.15486	-0.120412	-0.61634	-0.45924	23.6556	26.5195	26.7538	28.258	28.6557	28.7998
Cnot3	Q8K0V4	Cnot3	Q8K0V4	-2.44	0.00842522	-2.46839	-2.39448	-3.81976	-0.176689	-0.816246	-0.37133	26.6514	26.6352	26.5683	28.3222	28.2961	28.0012
Cnot6l	Q8VEG6	Cnot6l	Q8VEG6;D3YXZ0	-3.37	0.00111132	-6.06122	-5.79084	-6.39846	-2.04103	-3.146	-2.94583	24.2702	23.7165	24.125	27.1298	26.2518	26.4447
Cnot7	Q60809	Cnot7	Q60809;Q3TLK9	-2.11	0.0187516	-1.36095	-1.60437	-2.63171	-0.510754	0.47386	0.77159	27.7092	26.6974	26.7608	28.6633	28.4943	28.7827
Cnot9	Q9JKY0	Cnot9	Q9JKY0	-3	0.00313665	-1.10745	-2.59846	-2.25006	1.10037	0.803777	1.14127	27.8225	26.2044	27.0967	29.5471	29.7341	29.4771
Cnp	P16330	Cnp	P16330	-3.73	0.0034182	-7.49212	-6.8701	-6.68015	-3.04462	-2.46853	-4.35207	23.9343	24.1381	24.3615	25.4443	27.0106	25.4958
Cnpy2	Q9QXT0	Cnpy2	Q9QXT0;A0A1W2P729	-2.65	0.000600927	0.3084	-0.106936	0.100232	2.9377	2.41593	2.90174	29.337	28.4045	29.0935	30.6662	30.2746	30.7151
Cnpy3	Q9DAU1	Cnpy3	Q9DAU1	-5.71	0.0100179	-2.93522	-5.39427	-7.43748	0.28735	0.320134	0.748635	26.2576	23.4133	23.9893	29.0215	29.1114	29.0197
Cnpy4	Q8BQ47	Cnpy4	Q8BQ47;D3Z0T5	-2.67	0.0201483	-3.93821	-5.23527	-2.9177	-1.62977	-0.781897	-1.65807	25.4216	24.1214	25.867	26.7535	26.8824	26.1304
Cnr1	P47746	Cnr1	P47746	0.133	0.586952	0.509811	0.630247	0.643351	0.576094	0.377703	0.430366	29.4958	29.22	29.6447	28.9722	28.9354	28.7796
Cnrip1	Q5M8N0	Cnrip1	Q5M8N0;F7C0H6	0.346	0.186761	6.25876	6.31946	6.0185	5.82501	5.86582	5.86802	34.0773	34.1112	33.3573	33.4479	33.3027	33.3002
Cnst	Q8CBC4	Cnst	Q8CBC4	-2.32	0.0189947	-5.55166	-7.38232	-7.08869	-3.90097	-4.58945	-4.58627	24.0206	23.8524	24.3555	25.438	24.6603	24.6307
Cntfr	O88507	Cntfr	O88507	-0.679	0.0323726	0.255503	0.464775	0.142791	0.981928	0.948061	0.969927	28.3046	30.0509	28.5909	29.0376	29.5416	29.7228
Cntn1	P12960	Cntn1	P12960	0.59	0.0512661	5.24262	5.51816	5.33992	4.69788	4.886	4.74821	35.5626	35.7698	35.5643	34.9159	35.065	35.0559
Cntn2	Q61330	Cntn2	Q61330	1.36	0.0148165	-1.77778	-1.56898	-0.936423	-2.59609	-2.70714	-3.06599	28.6442	28.7232	29.106	27.9654	27.5993	27.3216
Cntn3	Q07409	Cntn3	Q07409	1.26	0.140468	-2.56837	-2.52832	-2.68421	-3.14248	-3.21652	-5.18951	27.9181	27.573	27.5035	26.9661	26.9963	26.5076
Cntn4	F8WH58	Cntn4	F8WH58;Q69Z26	-2.61	0.207362	-6.43333	-1.69651	-1.46781	-1.88743	0.327377	-0.193355	24.2436	27.9959	28.7525	29.0456	28.5951	28.2394
Cntn5	E9PYK7	Cntn5	E9PYK7;P68500	3.18	0.0164539	-3.014	-3.44699	-3.52546	-4.90112	-7.48158	-7.13858	26.911	26.7372	27.2885	25.6277	23.5572	23.5411
Cntn6	Q9JMB8	Cntn6	Q9JMB8;E0CXE3	1.59	0.00554009	-1.66545	-1.96841	-2.24628	-3.76553	-3.68087	-3.21237	28.5392	28.1411	28.3446	27.1397	26.8417	27.464
Cntnap1	O54991	Cntnap1	O54991	-0.789	0.0311141	-0.230414	-0.31446	0.0866501	0.73706	0.440677	0.730076	30.8738	30.4379	31.037	31.0161	30.6604	30.9148
Cntnap2	E9QNF7	Cntnap2	E9QNF7;Q9CPW0	0.339	0.41556	0.136291	0.647571	-0.286216	-0.246196	0.0893358	-0.362451	30.7259	30.6993	30.9035	30.2646	30.2127	30.1652
Cntnap4	D3YWB9	Cntnap4	D3YWB9;Q99P47	1.25	0.0558032	-0.459434	-1.46541	-1.61869	-2.81391	-1.94658	-2.535	29.2535	29.1811	29.0509	28.2922	28.6647	28.2061
Cntnap5a	Q0V8T9	Cntnap5a;Cntnap5c;Cntnap5b	Q0V8T9	1.68	0.149056	-2.47757	-3.51214	-1.80341	-3.16248	-3.84201	-5.83576	27.6256	27.12	28.2308	27.1484	26.5795	26.9001
Coa3	Q9D2R6	Coa3	Q9D2R6;E9Q6W2	-4.7	0.0338976	-1.02381	-5.97077	-1.80232	1.49114	1.93753	1.86302	26.6179	24.4497	26.1155	28.9129	29.0359	28.4791
Coa6	Q8BGD8	Coa6	Q8BGD8	-2.44	0.284294	-1.32542	-6.59353	-0.531154	0.569961	-0.891915	-0.798034	25.8138	24.1999	26.4786	27.476	25.9248	25.9859
Coa7	Q921H9	Coa7	Q921H9	-0.611	0.158942	0.0486092	-0.158217	0.771607	0.634536	0.97622	0.883996	28.9072	29.0051	29.0943	28.9785	29.172	29.2788
Coasy	Q9DBL7	Coasy	Q9DBL7	-0.777	0.0546119	0.808919	0.187372	0.496282	1.52312	1.05864	1.24299	30.1006	29.5844	29.9272	30.1771	29.7225	29.5738
Cobl	G5E8P4	Cobl	G5E8P4;G3UWY3;Q5NBX1	0.359	0.764988	-6.94737	-6.96879	-6.7687	-9.15081	-5.68499	-6.92636	23.2772	23.5657	24.1395	21.4333	24.8098	24.4171
Cog1	Q9Z160	Cog1	Q9Z160	-3.55	0.0073206	-6.76703	-5.40086	-5.47666	-1.94557	-1.59402	-3.46554	23.7736	24.1885	24.7644	28.2917	28.1529	27.9616
Cog2	Q921L5	Cog2	Q921L5	-3.81	0.000446595	-6.16789	-5.41877	-5.67172	-1.4662	-2.23794	-2.10951	23.2309	24.8027	23.873	28.493	27.9221	27.8625
Cog3	E9QL65	Cog3	E9QL65;A0A2I3BQD7;Q8CI04	-3.59	0.00379241	-5.65151	-7.57992	-6.29214	-2.50175	-3.16361	-3.08213	26.3869	24.0053	24.0982	27.3843	27.2502	26.6814
Cog4	Q7TSQ9	Cog4	Q7TSQ9;G3UWH9;Q8R1U1	-4.41	0.00666949	-8.04538	-5.49058	-6.29373	-1.61701	-1.8541	-3.13565	23.9436	23.2458	24.5534	27.8237	27.7988	27.6202
Cog5	Q8C0L8	Cog5	Q8C0L8	-2.15	0.00394147	-3.34554	-2.21324	-2.85498	-0.574851	-0.674846	-0.702984	27.5555	27.9297	27.2062	28.9602	29.0529	29.2171
Cog6	Q8BRB0	Cog6	Q8BRB0;A0A0R4J0L5;Q8R3I3	-3.16	0.00306298	-5.34338	-6.39664	-4.74028	-2.26064	-2.47244	-2.25844	25.3287	24.0839	25.6444	27.6298	27.1781	26.1877
Cog7	A0A0R4J0Q9	Cog7	A0A0R4J0Q9;Q3UM29;Q3TR20	-2.13	0.000896736	-2.69819	-3.06923	-3.13536	-0.801378	-0.713631	-1.0085	27.435	27.6308	27.0273	28.9134	29.0845	28.6915
Cog8	Q9JJA2	Cog8	Q9JJA2	-4.84	0.00101128	-6.31709	-7.0028	-7.51528	-2.86944	-1.29848	-2.14365	24.6682	23.6932	23.487	26.8009	27.4639	27.3689
Coil	E9Q284	Coil	E9Q284;Q5SU73	-5.3	7.83439e-05	-6.34964	-6.13976	-6.72714	-1.18784	-1.21998	-0.902909	23.804	24.1312	23.6436	28.1665	28.0622	27.9383
Col12a1	E9PX70	Col12a1	E9PX70;Q60847	-0.946	0.129568	-7.0879	-7.07231	-7.74766	-5.56788	-6.9605	-6.54044	23.3075	24.186	24.1299	26.206	24.7241	25.1114
Col18a1	E9QPX1	Col18a1	E9QPX1;P39061	2.29	0.109335	-6.07265	-2.6766	-3.51997	-5.83335	-5.96097	-7.34095	NA	NA	NA	NA	NA	NA
Col1a1	P11087	Col1a1	P11087	2.16	0.0183965	-2.85875	-4.16896	-3.65534	-6.27181	-5.95909	-4.91957	28.3099	26.7169	27.0602	23.6754	23.7419	24.446
Col20a1	F6UFI2	Col20a1	F6UFI2;A0A2K6EDL8;Q923P0	0.324	0.876542	-7.71634	-4.29099	-4.11763	-3.23867	-6.11466	-7.74315	24.576	26.5616	26.5753	27.1126	23.6014	24.408
Col27a1	Q5QNQ9	Col27a1	Q5QNQ9	-0.728	0.363701	-6.83948	-6.15413	-6.35185	-6.9917	-5.08444	-5.08419	23.153	24.6864	24.3431	23.9174	25.8772	25.861
Col4a2	P08122	Col4a2	P08122	1.41	0.419507	-3.22511	-6.73627	-4.97329	-5.09317	-8.59862	-5.46354	27.7129	25.2668	26.2226	26.6622	23.996	24.1768
Col4a3bp	Q9EQG9	Col4a3bp	Q9EQG9	-3.53	0.00641475	-4.98994	-6.87442	-6.95112	-3.23077	-2.32169	-2.67145	26.8281	23.5168	23.5383	26.2566	26.7777	26.4627
Col6a1	Q04857	Col6a1	Q04857	0.174	0.878372	-4.01574	-6.21452	-7.19142	-5.93305	-6.17819	-5.83304	23.5266	24.0392	24.6554	24.3235	23.989	24.3014
Col6a3	J3QQ16	Col6a3	J3QQ16;A0A087WS16;E9PWQ3	0.791	0.136035	-6.38077	-5.75567	-6.61545	-6.47414	-7.42282	-7.2289	NA	NA	NA	NA	NA	NA
Col6a5	A0A140T8W1	Col6a5	A0A140T8W1;A0A140T8T7;A6H584	-0.878	0.113995	-6.03192	-6.48735	-7.19381	-5.76943	-6.01945	-5.28906	24.2348	23.9914	23.9924	26.1775	25.8382	25.6069
Commd1	Q8K4M5	Commd1;Gm28048	Q8K4M5;G8JL54;Q8VI86	-3.17	0.196561	0.112385	-6.83133	-2.83156	-0.851338	0.809191	-0.00152574	27.3925	24.2806	26.4293	26.3447	27.0525	27.5336
Commd10	Q8JZY2	Commd10	Q8JZY2;A0A3Q4EII3;A0A3Q4EHW7;Q3UTM6;A0A3Q4EC50;A0A3Q4EHG2;A0A3Q4EGT0	-0.11	0.784934	0.542678	-0.0970194	0.726573	0.749114	0.314584	0.437162	28.9704	28.5439	29.1345	28.5698	28.3396	28.239
Commd2	Q8BXC6	Commd2	Q8BXC6	-0.0479	0.947718	-0.709523	-0.473465	-2.17166	-0.638154	-0.986999	-1.58593	26.9134	26.9307	27.5597	26.6958	26.5047	26.8088
Commd3	Q63829	Commd3	Q63829	-0.336	0.395428	1.44895	0.533375	1.2011	1.5079	1.37755	1.30486	29.6341	28.3598	29.2653	29.269	29.0733	29.267
Commd4	Q9CQ02	Commd4	Q9CQ02;A0A1L1SRX4;A0A1L1SVC7;A0A1L1SRJ9	-1.62	0.193608	-3.27214	0.193561	-2.08304	0.122728	0.0501826	-0.477958	26.9771	28.0306	27.0935	27.7502	27.4771	27.5785
Commd5	A0A0R4J0U7	Commd5	A0A0R4J0U7;Q8R395	-0.717	0.208926	-1.43594	0.0300063	-0.582247	-0.18074	0.123885	0.219663	28.0794	27.2816	27.8617	28.4601	28.5266	28.4011
Commd6	Q3V4B5	Commd6	Q3V4B5;B7ZNP3	1.14	0.292377	0.472068	0.2506	0.546579	-2.53354	0.0814565	0.302271	28.123	27.6187	28.0679	27.58	27.4099	27.4171
Commd7	Q8BG94	Commd7	Q8BG94;A2AU52	-0.0824	0.794621	1.69388	1.20912	1.44487	1.74399	1.51464	1.33633	29.7525	29	29.3098	29.3635	29.3446	29.3011
Commd8	Q9CZG3	Commd8	Q9CZG3	-0.196	0.603242	0.633178	0.0507121	0.859734	0.528332	0.854087	0.748697	28.6786	28.9322	28.8745	28.5544	28.578	28.5314
Commd9	Q8K2Q0	Commd9	Q8K2Q0	0.307	0.537552	1.63605	0.411715	1.28082	1.03543	0.605376	0.767898	29.7231	29.3225	29.5404	29.1465	29.0138	29.2603
Comt	O88587	Comt	O88587	-0.515	0.251215	1.29774	1.36725	2.17189	2.46144	1.8904	2.02908	30.5988	30.4403	30.3496	30.5345	30.5374	30.6434
Comtd1	Q8BIG7	Comtd1	Q8BIG7;H3BJ37	-0.108	0.843398	1.19026	0.20171	1.32598	1.45794	0.756487	0.827115	29.6008	28.9382	30.0056	29.4711	28.8054	28.7273
Copa	Q8CIE6	Copa	Q8CIE6;F8WHL2	-2.65	0.000264055	0.433346	0.124513	0.314432	2.82827	3.00194	2.98689	31.7388	31.5784	31.7709	33.411	33.4742	33.4528
Copb1	Q9JIF7	Copb1	Q9JIF7	-2.11	0.00170668	1.05764	0.400454	0.377933	2.65041	2.72856	2.77259	31.4445	31.2277	31.386	32.8323	32.4968	32.525
Copb2	O55029	Copb2	O55029	-2.64	0.00135791	0.490594	0.632647	-0.207326	2.71098	2.92202	3.18866	31.2876	31.3951	30.9987	32.8924	32.7635	32.9889
Cope	O89079	Cope	O89079;D3Z315;F6YFR7	-5.17	0.00022381	-2.29301	-1.81184	-2.94522	2.51829	2.86933	3.06671	25.7673	26.2846	25.9086	30.3656	31.5574	31.5566
Copg1	Q9QZE5	Copg1	Q9QZE5	-2.28	0.000406785	0.218613	0.338601	0.0388297	2.41496	2.4855	2.5245	30.9595	30.9842	31.0527	32.4786	32.241	32.2428
Copg2	Q9QXK3	Copg2	Q9QXK3	-2.07	0.00102617	-0.923494	-0.454568	-0.852099	1.2003	1.31402	1.47863	29.9958	29.8649	30.0884	31.1325	31.1498	31.2869
Cops2	A2AQE4	Cops2	A2AQE4	2.37	0.35898	-0.72654	-0.828524	-0.683504	-0.751672	-1.00899	-7.60075	28.2607	27.8759	28.1741	28.0023	27.6557	23.9948
Cops2.1	P61202	Cops2	P61202	0.279	0.370517	1.25697	1.76549	1.80548	1.29903	1.27001	1.42149	30.1001	30.6343	30.6231	30.325	29.9967	30.3596
Cops3	O88543	Cops3	O88543	0.123	0.781051	2.12333	3.16294	3.01119	2.60793	2.64058	2.67969	31.7466	32.3926	32.0721	31.7285	31.8887	31.9041
Cops4	O88544	Cops4	O88544;F6QTS1;D3YV99;D3Z1R9	0.319	0.231779	3.33693	3.37766	3.47848	2.87799	3.17287	3.18541	32.8575	32.429	32.6125	32.4667	32.4936	32.428
Cops5	O35864	Cops5	O35864	-0.106	0.801596	2.8633	2.48499	2.04215	2.88832	2.56776	2.25146	31.6391	31.2581	31.4215	31.0599	30.9548	31.0168
Cops6	D3Z0F5	Cops6	D3Z0F5;O88545	-0.199	0.667195	2.21385	3.10023	2.27284	2.33411	2.9527	2.89829	30.7353	31.1945	30.8821	30.8959	30.9394	30.9939
Cops7a	Q9CZ04	Cops7a	Q9CZ04;D3Z440;D3YVI6	-0.33	0.300899	1.43996	1.65511	1.28314	1.48024	1.98944	1.89843	29.6757	30.0036	29.7016	29.951	29.9484	30.014
Cops7b.1	Q8BV13	Cops7b	Q8BV13	-0.546	0.0886875	0.911974	0.985269	0.773262	1.19331	1.43902	1.67686	29.7044	29.3244	29.3579	28.6511	29.182	28.9922
Cops8	Q8VBV7	Cops8	Q8VBV7	0.287	0.477483	2.56792	2.88191	2.63528	2.01795	2.2714	2.93554	30.3343	30.3622	30.4489	29.8643	30.0125	29.9354
Cops9	D3Z159	Cops9	D3Z159;Q3U898	-1.75	0.682078	-6.44523	1.06994	-7.20398	-7.58616	0.0291148	0.222765	23.6547	26.6862	23.3649	23.9577	25.4792	25.5597
Copz1	A0A2R8VJV3	Copz1	A0A2R8VJV3	3.17	0.290302	-1.74718	0.579056	-1.9363	-6.81454	0.695952	-6.48528	NA	NA	NA	NA	NA	NA
Copz1.1	P61924	Copz1	P61924;Q8R3M1	-1.36	0.00571734	1.22449	1.19433	0.940057	2.45089	2.22891	2.77208	28.2644	28.3029	27.9525	29.2083	29.3154	29.4073
Coq3	Q8BMS4	Coq3	Q8BMS4	-1.44	0.00756928	-1.21402	-0.685365	-1.33458	0.278901	0.605707	0.202056	28.4037	27.8439	27.9103	28.6494	28.6503	28.6308
Coq5	Q9CXI0	Coq5	Q9CXI0	-3.24	0.000206983	-3.62345	-3.56527	-3.13861	-0.141816	-0.292632	-0.174238	25.6158	25.2055	25.6694	27.6879	28.3113	28.4182
Coq6	Q8R1S0	Coq6	Q8R1S0;D3YW66	-5.11	0.000643351	-6.24216	-6.27946	-4.74896	-0.77556	-0.837386	-0.338465	23.8925	23.583	25.2584	28.3615	28.0766	28.268
Coq7	P97478	Coq7	P97478;A0A140LIF0;Q3TYT1	-2.56	0.0118357	-1.76742	-1.2093	-2.98788	0.41429	0.21313	1.08982	27.4565	27.3158	26.2989	28.8785	28.4787	28.6591
Coq8b	E9QLB8	Coq8b	E9QLB8;Q566J8;A0A0R4J1X1	-3.4	0.0176728	-3.49884	-6.4094	-4.08038	-1.01302	-1.56244	-1.2141	26.4912	23.444	25.9256	28.5774	27.8437	28.0317
Coq9	F6SFF5	Coq9	F6SFF5;Q8K1Z0	-2.48	0.0361119	-0.164448	-2.561	-0.265931	1.83079	1.51111	1.09315	27.735	26.0295	27.5581	29.8338	28.9861	29.1917
Coro1a	O89053	Coro1a	O89053;G3UYK8	0.249	0.417153	5.49329	5.60057	5.11422	5.02641	5.34455	5.09013	34.4101	34.1342	34.3354	34.0151	33.8573	33.8037
Coro1b	Q9WUM3	Coro1b	Q9WUM3	0.224	0.421591	2.81973	2.99613	2.77292	2.49457	2.87529	2.54675	31.6744	31.6296	31.9046	31.3883	31.1656	31.3159
Coro1c	Q9WUM4	Coro1c;Coro6	Q9WUM4	-0.158	0.690534	4.27582	4.91698	4.46372	4.35655	5.06756	4.7078	33.4829	33.7046	33.4664	33.1907	33.5532	33.4366
Coro2a	B1AVH5	Coro2a	B1AVH5;Q8C0P5	-0.481	0.122732	-1.77751	-1.46453	-1.80972	-0.988861	-1.33046	-1.28953	28.4607	28.0348	28.0614	27.8284	27.8806	27.7978
Coro2b	G3UW48	Coro2b	G3UW48	1.71	0.305205	-2.4267	-5.64081	-2.27928	-6.93943	-4.60952	-3.9176	26.5826	23.9309	25.9821	23.9685	23.5155	25.0501
Coro2b.1	Q8BH44	Coro2b	Q8BH44	-2.34	0.0432185	-1.26014	-3.8911	-2.9734	-0.351048	-0.824724	0.0611448	28.2238	25.9676	26.6508	29.0728	28.5584	28.3657
Coro7	Q9D2V7	Coro7	Q9D2V7	-1.42	0.006297	-0.309667	-0.423826	-0.501825	0.637607	1.32692	1.06168	30.113	30.0287	30.1232	30.27	30.5958	30.5256
Cotl1	Q9CQI6	Cotl1	Q9CQI6	-0.616	0.196599	4.35326	5.17265	4.01663	5.1691	5.22988	4.99083	32.5952	33.0562	32.1686	32.1017	32.7172	32.6979
Cox15	Q8BJ03	Cox15	Q8BJ03	-1.02	0.0780783	0.867839	-0.311031	0.125984	1.64357	0.950426	1.15009	29.6461	28.4546	29.5742	29.9615	29.7232	29.7216
Cox17	P56394	Cox17	P56394	-3.29	0.00385475	-1.30478	-0.00633287	-0.585945	2.04004	3.41164	2.51814	27.3238	27.7457	27.9131	28.5307	29.1174	29.0356
Cox20	Q9D7J4	Cox20	Q9D7J4	-2.92	0.23286	-0.73732	-6.96681	-0.739285	0.394405	-0.15551	0.0671651	26.5881	23.4061	26.29	27.1293	26.7169	26.863
Cox4i1	P19783	Cox4i1;Chka	P19783;M0QWX7	-1.06	0.00752387	3.89317	3.9034	4.08342	5.01202	4.87243	5.16124	31.9802	32.1422	32.2931	32.6158	33.0486	33.1373
Cox5a	P12787	Cox5a	P12787	-0.633	0.0568661	5.19385	4.90469	5.18667	5.9519	5.62476	5.60888	33.1459	33.1676	33.1439	33.9545	33.6229	33.6669
Cox6a1	Q9DCW5	Cox6a1	Q9DCW5;P43024	-1.35	0.00357585	3.77985	3.93235	4.1127	5.19576	5.23292	5.43427	29.9064	30.8522	31.0704	31.8119	31.9541	32.5288
Cox6b1	P56391	Cox6b1	P56391;A0A140LIU3	-1.19	0.0169406	3.06447	3.60645	3.88912	4.83819	4.66058	4.63479	31.1115	31.0223	30.9658	31.6911	31.6915	31.6872
Cox6c	Q9CPQ1	Cox6c	Q9CPQ1	-2.26	0.000555118	3.59865	3.54572	3.47113	5.56143	5.99256	5.82732	31.491	30.7902	30.8205	32.5336	32.4537	32.4226
Cox7a2	P48771	Cox7a2	P48771	-1.59	0.00266895	2.79435	2.29529	2.66151	4.27435	4.06838	4.19163	29.6394	28.9331	29.503	30.9113	30.3791	30.5688
Cox7a2l	E9PZS8	Cox7a2l	E9PZS8;Q61387	-5.6	6.07607e-05	-7.02695	-6.75309	-6.82769	-1.51321	-1.19786	-1.10693	24.5508	24.7082	23.8022	26.2408	26.4668	26.525
Cox7c	P17665	Cox7c	P17665	-7.62	0.00015622	-5.22179	-6.74758	-5.66893	2.15882	1.41605	1.65792	23.6458	23.3917	24.1773	29.0598	28.29	28.3984
Cp	G3X9T8	Cp	G3X9T8;G3X8Q5;E9PZD8;Q61147	4.15	0.0413289	-2.79471	-0.87539	-0.629083	-7.34263	-3.09726	-6.31367	28.324	29.2837	29.6267	23.5327	26.6064	24.0896
Cpd	O89001	Cpd	O89001	-4.84	0.000426765	-2.71629	-4.00116	-4.00675	1.34022	1.15341	1.3109	27.7818	27.6887	28.9164	31.7282	30.5578	32.4516
Cpe	Q00493	Cpe	Q00493	-0.169	0.515978	3.05493	3.40428	3.26891	3.41631	3.465	3.35385	32.2415	32.5703	32.5116	32.6213	32.42	32.59
Cpeb2	A0A0H2UH22	Cpeb2	A0A0H2UH22;E9Q969;Q812E0;E9Q5X2	-3.76	0.00865525	-7.11397	-5.23758	-6.40179	-1.52801	-2.34974	-3.59889	23.5942	24.5291	23.8551	27.9451	27.0772	25.9258
Cpeb3	A0A0R4J102	Cpeb3	A0A0R4J102;Q7TN99;D3Z1R6;D3Z5R9;F6T0J8	-4.35	0.00139195	-5.68508	-6.46021	-7.5456	-2.01791	-2.15873	-2.47141	23.8031	23.7379	23.5106	27.3719	26.8176	27.1297
Cpeb4	Q7TN98	Cpeb4	Q7TN98;Q5SU48;Q5SU47	-5.26	0.00153397	-5.70321	-5.73111	-7.80517	-1.06809	-1.37322	-1.01355	23.8636	24.1074	23.4019	28.1798	28.1648	28.1934
Cplx1	P63040	Cplx1	P63040;D3YZ72	-0.447	0.290302	4.69645	3.73922	4.53301	4.92033	4.68624	4.70193	31.345	31.2842	31.3528	31.6309	31.7487	31.646
Cplx2	P84086	Cplx2	P84086	0.691	0.0513298	5.68029	5.31025	5.57346	5.07219	4.78038	4.63731	32.5499	32.1924	32.0528	31.656	32.1508	32.2611
Cpne1	Q8C166	Cpne1	Q8C166;B7ZCP4;A3KGK7	0.278	0.707581	0.0125393	-1.35504	-1.76676	-0.940246	-1.88006	-1.12403	28.4832	28.1628	28.4307	28.0439	27.6525	27.4028
Cpne2	A0A0R4J1D0	Cpne2	A0A0R4J1D0;P59108	-0.576	0.224002	0.655687	0.00683379	-0.269581	0.268452	0.949209	0.903461	29.764	29.0037	29.4326	29.8124	29.5695	29.861
Cpne4	Q8BLR2	Cpne4	Q8BLR2;Q9D6C8;A0A1L1SSY1	0.914	0.0745898	2.08647	1.58707	1.67941	0.446447	0.705866	1.45903	31.3345	30.7115	31.0472	30.9375	30.4327	30.5807
Cpne5	Q8JZW4	Cpne5	Q8JZW4	-0.628	0.0841266	-2.61282	-2.3331	-2.31396	-2.12028	-1.73924	-1.51644	26.8277	26.8418	27.0294	27.9027	27.4095	27.5997
Cpne6	Q9Z140	Cpne6	Q9Z140;Q3UYN2	-0.935	0.165649	1.2233	0.763212	0.566043	2.7487	1.16594	1.44198	31.3483	30.8627	30.7652	30.9906	30.8098	30.9624
Cpne7	Q0VE82	Cpne7	Q0VE82	-0.474	0.127669	-0.662575	-0.440952	-0.136363	0.0365413	0.0313176	0.112869	29.2364	29.0492	29.0135	29.2137	28.8208	28.7132
Cpne8	Q9DC53	Cpne8;Cpne9;Cpne5	Q9DC53	-1.51	0.00987241	-1.78517	-2.4977	-1.74628	-0.209502	-0.717215	-0.562735	28.0578	27.2638	27.9711	28.8924	28.8016	28.9302
Cpox	P36552	Cpox	P36552	-2.04	0.00450263	-2.34854	-2.50881	-1.5241	-0.227588	-0.148051	0.126376	27.7055	26.9699	28.0053	28.8898	28.8483	28.897
Cpped1	Q8BFS6	Cpped1	Q8BFS6;D3Z7F7	-0.158	0.869755	-0.119754	-2.30808	-2.58262	-1.42501	-1.72097	-1.39121	27.7281	26.4507	26.6923	26.4928	26.603	26.8959
Cpsf1	A0A2R8VK76	Cpsf1	A0A2R8VK76;Q9EPU4	-4.78	0.00176697	-7.81643	-5.98768	-7.78118	-2.82249	-2.5227	-1.89526	24.2616	23.6683	23.4803	28.2958	28.1913	28.3812
Cpsf2	O35218	Cpsf2	O35218	-5.55	0.000264055	-6.68127	-6.62741	-5.39224	-0.861184	-0.644509	-0.536169	24.7259	23.7307	26.1085	29.3511	29.2487	29.0301
Cpsf3	Q9QXK7	Cpsf3	Q9QXK7;A0A1Y7VLY3	-4.43	0.000114911	-6.201	-5.70246	-6.3046	-1.7298	-1.59717	-1.58698	25.2311	24.8559	23.8674	27.909	27.9944	27.9727
Cpsf4	B2LVG5	Cpsf4	B2LVG5;B2LVG6;E0CXT7;Q8BQZ5;M0QWM8;F7B6Z5	-4.69	0.000118531	-6.25148	-6.23973	-6.87987	-1.64659	-1.77086	-1.87764	23.7769	23.6535	24.1871	27.0481	26.3033	26.1777
Cpsf6	H3BJ30	Cpsf6	H3BJ30;H3BJW3;Q6NVF9;H3BKW0	-7.87	4.94181e-05	-5.86742	-5.64601	-6.26256	1.74974	1.94844	2.13215	24.3112	23.8636	23.161	30.965	31.0458	29.3063
Cpsf7	Q8BTV2	Cpsf7	Q8BTV2	-6.3	0.00234166	-4.99517	-6.52353	-3.21185	1.35703	1.28207	1.51862	23.7707	23.6575	27.5373	30.0032	30.6466	29.3372
Cpt1c	A0A1D5RLH1	Cpt1c	A0A1D5RLH1;A0A1D5RLP8	3.46	0.0062601	-2.57325	-3.02728	-2.37319	-6.44305	-7.02987	-4.86994	25.4738	24.8832	25.2869	23.9165	24.0698	24.5777
Cpt1c.1	Q8BGD5	Cpt1c	Q8BGD5	-1.26	0.00750494	-0.965854	-0.360485	-0.730221	0.624966	0.531903	0.552545	29.1914	29.6096	29.4254	29.7624	29.681	29.822
Cpt2	P52825	Cpt2	P52825	-2.47	0.0116874	-5.55528	-7.31928	-7.07536	-4.39798	-4.02017	-4.11471	24.49	24.2239	23.3358	25.106	25.663	25.5357
Cpz	Q8R4V4	Cpz	Q8R4V4	0.832	0.672317	-2.46847	-6.10923	-2.81353	-2.98871	-7.04911	-3.85015	27.0289	23.683	26.7915	26.6399	23.8843	26.1603
Cr1l	A0A0A6YXR6	Cr1l	A0A0A6YXR6;A0A0A6YVT1;A0A0A6YXN9;A0A0A6YY75;Q64735	-0.0298	0.992456	-1.45388	-7.5563	-0.58117	-6.63028	-2.03545	-0.836327	26.1859	24.3703	26.929	24.2289	24.4548	26.6574
Cradd	O88843	Cradd	O88843	1.45	0.434219	-2.83777	-1.14389	-0.806269	-1.43769	-1.70468	-5.99212	24.245	26.2211	26.5413	25.9769	25.8138	23.2402
Crat	H7BX88	Crat	H7BX88;P47934;B7ZDD7	-2	0.00325475	-0.50386	-1.34233	-0.979849	0.919705	1.30576	0.939427	29.2065	28.2544	29.1111	30.1951	30.1688	30.0356
Crbn	Q8C7D2	Crbn	Q8C7D2	-1.38	0.037181	-0.523366	-0.809042	-1.86542	0.194918	0.538206	0.195178	28.7926	28.7198	28.4854	28.8791	29.0919	28.897
Creb1	Q62347	Creb1	Q62347;Q01147;A0A087WRI6	-5.67	0.000593843	-6.25242	-5.73521	-7.14892	-0.350779	-0.255647	-1.52112	23.7411	25.4864	23.6223	25.8958	26.0043	25.8519
Creb5	A0A0N4SV71	Creb5	A0A0N4SV71;A0A0N4SUW5	-1.03	0.0545947	-2.83342	-2.54108	-3.24591	-2.37897	-1.70293	-1.45042	26.4036	26.3307	26.1325	26.5142	26.3962	26.6921
Crebbp	A0A0U1RQB6	Crebbp	A0A0U1RQB6;F8VPR5;P45481	0.0499	0.89261	-4.74394	-4.05531	-4.28997	-4.17726	-4.4551	-4.60645	26.4701	26.673	26.6323	26.2082	26.4533	26.3612
Creg1	K4DI63	Creg1	K4DI63;O88668	-5.47	0.000278887	-7.08478	-6.79583	-5.80885	-0.762405	-1.4357	-1.08147	23.2036	24.184	23.6134	26.4066	25.6441	25.9655
Creg2	Q8BGC9	Creg2	Q8BGC9	-5.45	5.05235e-05	-7.41212	-7.35797	-7.1379	-1.92118	-1.8249	-1.82482	24.2356	24.2326	23.3151	26.1292	26.1511	26.067
Creld1	Q91XD7	Creld1	Q91XD7	-1.64	0.00304573	-0.272706	-0.665521	-0.175581	1.06709	1.30127	1.45168	28.9896	29.0729	29.3605	30.1982	30.2823	30.0728
Creld2	Q9CYA0	Creld2	Q9CYA0	-4.46	0.00796314	-3.7752	-6.49674	-6.6137	-0.853809	-1.12466	-1.53295	25.91	23.8983	24.3269	27.4921	27.2197	26.7826
Crhr1	P35347	Crhr1	P35347	0.0381	0.982097	-3.13782	-6.26651	-3.16736	-6.18462	-3.24263	-3.25872	25.6795	23.9204	25.5204	23.4624	25.2522	25.2033
Crip2	Q9DCT8	Crip2	Q9DCT8	0.248	0.422867	6.03071	5.60494	6.01103	5.686	5.80293	5.41435	34.1788	33.4728	33.9904	33.5396	33.5314	33.2761
Crk	Q64010	Crk	Q64010;Q8JZR2;Q5ND50;F7D232	0.412	0.157742	2.29871	2.55506	2.35479	1.76881	2.10757	2.09714	31.199	31.5214	31.2173	30.5029	30.6482	30.9568
Crkl	P47941	Crkl	P47941;A0A338P675;A0A338P6Q0	0.000313	0.998794	1.08334	1.12631	1.14952	1.03106	1.12239	1.20479	29.7605	29.8274	30.1207	29.6727	29.4627	29.3477
Crlf3	J3QMV5	Crlf3	J3QMV5;Q9Z2L7	1.54	0.686876	-6.67471	1.23282	-2.42543	-6.5774	0.579637	-6.48015	23.259	29.2267	25.7217	24.5172	28.5339	24.2521
Crmp1	P97427	Crmp1	P97427	4.01	0.202288	2.21258	4.61354	3.25965	2.14572	1.69126	-5.76668	32.2947	34.2204	32.9863	32.2796	29.9716	24.2792
Crmp1.1	Q6P1J1	Crmp1	Q6P1J1	0.638	0.115597	1.89179	2.55759	2.70377	1.66076	1.87584	1.70327	32.2385	32.152	32.0147	31.6746	31.8927	31.8044
Crnkl1	P63154	Crnkl1	P63154	-0.38	0.723076	-6.54301	-4.34392	-3.72859	-4.59023	-4.96492	-3.92155	24.107	25.7888	26.1731	25.6904	25.4584	25.0664
Crocc.1	Q8CJ40	Crocc	Q8CJ40	-2.14	0.00229849	-6.89828	-6.13106	-6.90656	-4.61486	-4.48945	-4.42654	24.8652	26.1636	23.9029	26.4931	26.4328	27.0245
Crocc2	F6XLV1	Crocc2	F6XLV1	-0.704	0.596743	-7.46767	-4.17413	-7.48433	-5.24258	-6.22833	-5.54422	24.8873	23.8261	24.0653	25.1354	25.7872	25.1314
Crot	Q9DC50	Crot	Q9DC50	-2.14	0.0462979	-5.31769	-6.85444	-4.88814	-3.09012	-3.0594	-4.48102	25.3605	23.3642	25.6604	25.8408	25.9186	25.8418
Crtac1	Q8R555	Crtac1	Q8R555	0.502	0.137919	1.3831	1.07529	1.08013	0.940825	0.714301	0.377757	30.2269	30.1834	30.2191	30.3919	30.0701	29.8962
Crtc1	Q68ED7	Crtc1	Q68ED7	0.723	0.3458	0.677575	0.428778	0.776325	-1.34537	0.440528	0.618401	29.2812	28.6406	28.9556	27.2744	28.288	28.4367
Cry2	Q9R194	Cry2;Cry1	Q9R194;P97784	0.358	0.819424	-5.08588	-4.32901	-6.86654	-7.47484	-3.71146	-6.17025	NA	NA	NA	NA	NA	NA
Cryl1	Q99KP3	Cryl1	Q99KP3	-1.37	0.038666	-1.84712	-1.77759	-1.50363	-0.809165	0.495121	-0.693168	27.0645	27.3325	27.5285	27.7652	28.6328	27.8476
Crym	O54983	Crym	O54983	-2.69	0.000340943	2.08117	2.43559	1.96119	4.79776	4.83751	4.89953	31.1994	31.3806	31.226	33.1245	32.9732	32.9266
Cryz	P47199	Cryz	P47199;A0A0A6YXR4;V9GXY8	0.604	0.418023	0.304612	0.58101	1.07684	-1.00616	0.187916	0.970158	29.1187	29.6345	29.6312	28.5628	29.0322	29.075
Cryzl1	Q921W4	Cryzl1	Q921W4;D3Z6I4;D3YZD6;A0A338P785;D3YU21;F7BGV1	-0.269	0.476502	1.67558	2.0291	1.51172	1.60106	2.31813	2.10346	30.3769	30.8649	30.6047	30.5788	30.8436	30.5925
Cs	Q9CZU6	Cs;Csl	Q9CZU6	-0.54	0.0591443	6.45625	6.3375	6.20927	6.89295	6.81726	6.91344	35.3751	34.9416	35.0005	35.734	35.7557	35.6768
Csdc2	Q91YQ3	Csdc2	Q91YQ3	-0.872	0.0738565	0.14435	-0.578419	-0.897804	0.5258	0.475165	0.28248	27.263	27.7826	27.5078	27.9721	27.8558	27.5469
Csde1	Q91W50	Csde1	Q91W50;Q8JZN2;A0A0G2JF72	-0.833	0.015378	1.51075	1.63528	1.67916	2.36632	2.58162	2.37733	31.8977	31.8888	32.0492	32.3161	32.4883	32.3656
Cse1l	E9Q1T9	Cse1l	E9Q1T9	-3.89	0.000234859	-7.18583	-7.74761	-7.91037	-3.9517	-3.64544	-3.58418	24.0786	24.1201	23.7563	26.2654	26.3739	26.4795
Cse1l.1	Q9ERK4	Cse1l	Q9ERK4;F6ZEW4	0.314	0.270289	-0.0253989	-0.0752616	0.0462639	-0.0636421	-0.413706	-0.518179	30.625	30.0597	30.3635	30.1294	29.8001	29.7591
Csk	P41241	Csk	P41241	0.811	0.0981415	0.917797	0.718313	1.59788	0.665041	0.0157604	0.121462	30.5167	30.0678	30.8138	29.978	29.628	29.9362
Csmd1	Q923L3	Csmd1	Q923L3	0.344	0.287775	-3.31521	-2.80112	-3.07137	-3.23288	-3.65151	-3.33481	28.8003	28.6425	28.6303	28.0787	27.9255	28.0294
Csmd2	V9GX34	Csmd2	V9GX34	-0.761	0.26222	-4.46429	-4.99064	-3.19096	-3.63543	-3.20107	-3.52602	27.7206	27.2324	27.9627	27.7883	27.8502	27.5675
Csmd3	E9PWJ0	Csmd3	E9PWJ0;Q80T79;F6TRD7	1	0.472334	-4.08089	-4.95947	-3.79722	-4.20353	-4.06712	-7.56739	27.1853	26.4945	27.7554	26.7722	27.6659	26.4296
Csnk1a1	E9Q4G7	Csnk1a1	E9Q4G7;E9PWB2;Q8BK63;H7BXB1;E9Q3W1;E9Q2U6	-0.691	0.0480453	1.47135	1.28696	1.17316	2.24521	1.97251	1.78525	30.5874	29.8934	30.5247	30.9559	30.5352	30.5663
Csnk1d	Q9DC28	Csnk1d	Q9DC28	-0.807	0.195542	-2.63184	-2.0555	-1.36947	-1.18992	-1.78479	-0.661856	27.4515	26.835	27.898	28.2536	27.4652	27.3692
Csnk1e	Q9JMK2	Csnk1e;Csnk1d	Q9JMK2;Q3TYE1;F7A4U8	-0.226	0.70062	-0.219066	-1.49285	-0.794545	-1.00701	-0.0527572	-0.768293	28.3728	28.1247	28.2949	28.2222	28.6352	28.7991
Csnk1g1	A0A0U1RP94	Csnk1g1	A0A0U1RP94;Q8BTH8;A0A0U1RPD7;A0A0U1RNW0;A0A0U1RPM8;Q6P2B2;A0A0U1RPL1	0.579	0.21664	-1.54691	-0.586131	-0.772081	-1.86042	-1.23618	-1.54568	28.5405	28.2442	28.6956	27.2766	27.6956	27.1804
Csnk1g2	Q8BVP5	Csnk1g2	Q8BVP5;Q99K78	2.35	0.00149899	-2.08179	-1.47391	-1.44357	-3.98815	-4.28353	-3.7696	26.9221	27.401	27.2816	25.5452	25.54	26.0212
Csnk1g3	A0A494BAP2	Csnk1g3	A0A494BAP2;Q8C4X2	-1.41	0.201515	-3.94053	-4.14951	-6.3547	-2.77542	-3.07092	-4.36936	26.1955	25.7037	24.2352	25.979	25.1397	25.1755
Csnk2a1	Q60737	Csnk2a1	Q60737	-0.375	0.229811	3.18172	3.67607	3.43186	3.73121	4.01011	3.67384	32.2629	32.2493	32.6649	32.3962	32.4116	32.2668
Csnk2a2	O54833	Csnk2a2	O54833;A0A1D5RM74;A0A1D5RLE4	0.074	0.775529	2.85091	2.93849	2.84949	2.61419	2.90352	2.89932	31.3733	31.8702	31.857	31.2893	31.6583	31.716
Csnk2b	P67871	Csnk2b	P67871;G3UZJ5;G3UXG7;G3UZA4;G3UZX4	0.402	0.291418	4.92981	5.48593	5.36083	5.21053	4.84196	4.5187	33.0693	33.2714	33.3339	33.0352	32.7266	32.3854
Cspg5	Q71M36	Cspg5	Q71M36	0.217	0.663036	1.42296	2.54272	1.90824	1.34092	1.932	1.94929	30.3061	30.9957	30.6974	29.9088	30.3402	30.4538
Csrp1	P97315	Csrp1	P97315	-0.635	0.627777	-1.67517	-0.141076	-1.39101	-2.08816	1.40836	-0.62219	27.006	28.2853	27.3603	27.0099	28.8651	27.8687
Csrp2	P97314	Csrp2	P97314;A0A1W2P845;A0A1W2P7N8;A0A1W2P6I3;A0A1W2P758	3.84	0.113327	-0.262016	-1.41424	-0.479729	-0.750786	-6.71266	-6.19796	27.73	27.1976	27.8307	26.9958	24.9486	24.1344
Cst3	P21460	Cst3	P21460	1.21	0.204643	-0.98543	0.447707	0.547669	-1.90152	-1.7313	0.00780808	27.4499	27.6486	27.7999	26.6921	26.8526	27.0639
Cstb	Q62426	Cstb	Q62426	-0.24	0.485	2.91092	3.40398	3.40116	3.18352	3.57158	3.68023	30.49	30.9153	31.0024	29.8499	30.3186	30.3856
Cstf1	Q99LC2	Cstf1	Q99LC2	-6.58	6.92315e-05	-7.09867	-6.2987	-6.80267	-0.146935	0.00572971	-0.324986	23.6854	23.4488	23.7908	28.5397	28.3185	28.7235
Cstf2	A2AEK1	Cstf2	A2AEK1;Q8BIQ5;A2AEJ8	-1.91	0.0261865	-2.4878	-3.88089	-2.46185	-1.42822	-1.19755	-0.486215	26.7903	25.9938	26.7502	28.0198	27.862	27.8601
Cstf2t	Q8C7E9	Cstf2t	Q8C7E9	-4.13	0.00466402	-4.65458	-6.94999	-6.61926	-1.8533	-2.3693	-1.60929	26.8011	24.8541	24.3705	26.8768	27.4405	27.118
Cstf3	Q99LI7	Cstf3	Q99LI7	-6.65	0.000121083	-7.07033	-6.24529	-7.4791	-0.379706	-0.394955	-0.0721152	24.236	23.6484	25.0485	29.4371	29.4579	29.4424
Ctbp1	O88712	Ctbp1	O88712;A0A0J9YU62;A0A0J9YUM4	0.144	0.701892	3.11952	3.97386	3.53481	3.32955	3.34226	3.52562	32.6493	32.8608	32.64	32.1774	32.1461	32.2439
Ctbp2	Q91YZ2	Ctbp2	Q91YZ2;P56546;E9PWQ9	-0.871	0.0734848	-1.12533	-0.177425	-0.926329	-0.124193	0.295944	0.211457	28.3868	28.7194	28.5432	28.648	28.6116	28.6435
Ctc1	Q5SUQ9	Ctc1	Q5SUQ9;E0CXE7	-5.23	0.000446549	-7.44247	-6.26384	-6.07369	-1.10278	-1.80623	-1.17667	23.3624	23.5638	23.7272	29.2106	28.8793	29.1062
Ctcf	Q61164	Ctcf	Q61164	0.333	0.286263	-1.69324	-1.96748	-2.18796	-2.42711	-2.35549	-2.06598	NA	NA	NA	NA	NA	NA
Ctdnep1	Q3TP92	Ctdnep1	Q3TP92	-0.833	0.0545947	-2.4538	-2.32097	-2.06794	-1.00089	-1.61423	-1.72822	26.0156	25.8942	26.2719	26.7842	26.1342	26.3104
Ctdp1	Q7TSG2	Ctdp1	Q7TSG2	-2.01	0.124582	-4.69269	-4.24556	-7.49392	-3.65267	-3.01061	-3.75005	25.8044	25.9688	24.8979	26.4562	26.864	26.3918
Ctif	E9Q1U6	Ctif	E9Q1U6;Q6PEE2	-4.9	0.00126508	-4.39612	-5.31785	-6.27384	0.155199	-0.841171	-0.592995	27.3729	24.4921	22.9611	29.404	28.6239	29.7509
Ctla4	Q5SSM0	Ctla4	Q5SSM0;Q6GTR6;P09793	-4.48	0.0998425	-7.7876	-6.4753	-0.813385	-0.0419859	-0.633529	-0.966856	23.6781	23.8888	26.8743	27.5421	26.8612	26.4952
Ctnna1	P26231	Ctnna1	P26231	-0.97	0.774747	0.0726593	-5.83762	-6.37511	-1.11413	-7.20345	-0.913481	30.1509	24.2592	23.8102	29.2695	24.2161	29.4724
Ctnna2	Q61301	Ctnna2;Ctnna1	Q61301;E0CXB9	0.0912	0.80286	3.28796	3.86248	3.13832	3.14865	3.48007	3.38654	33.6168	33.771	33.6545	33.4207	33.4434	33.4554
Ctnnb1	Q02248	Ctnnb1	Q02248;E9Q6A9	0.536	0.0844883	3.54385	3.73344	3.89652	3.26414	3.29506	3.00567	33.6051	33.6127	33.7087	33.1463	33.2524	33.1318
Ctnnbip1	Q9JJN6	Ctnnbip1	Q9JJN6	-1.41	0.207575	0.933596	1.33368	-0.390602	3.57144	1.4728	1.07724	26.8176	27.3254	27.1457	28.8174	26.7081	26.354
Ctnnbl1	Q9CWL8	Ctnnbl1	Q9CWL8	-6.36	0.000438288	-7.19741	-6.24449	-7.41151	-0.0650363	-0.16764	-1.54914	23.9637	24.8522	24.1555	29.3167	28.6878	28.0432
Ctnnd1.1	E9Q8Z8	Ctnnd1	E9Q8Z8;P30999;G3X9V2;E9Q8Z6;D3Z2H2;E9Q904;E9Q8Z4;E9Q8Z9;E9Q901;D3Z7H6;E9Q905;E9Q986;E9Q907;D3Z2H7	0.827	0.447551	-3.55607	-4.14255	-3.97263	-4.23939	-3.43256	-6.4799	26.8463	25.9769	26.3001	25.9297	26.6472	23.8178
Ctnnd2	E9QKH8	Ctnnd2	E9QKH8;B7ZNF6;O35927	0.211	0.410894	2.01184	2.27711	2.22869	1.86249	2.05311	1.9695	32.8866	32.844	32.8708	32.3352	32.1637	32.2896
Ctps1	P70698	Ctps1	P70698	0.0953	0.789067	1.05205	0.908649	1.65609	1.17373	1.0556	1.10157	30.9372	30.8251	31.1636	30.7823	30.5306	30.3415
Ctps2	P70303	Ctps2	P70303	0.0484	0.916556	-0.511422	-0.972388	-1.15919	-0.40955	-1.02982	-1.34888	29.5296	28.4678	28.7338	28.8263	28.1819	27.9321
Ctr9	Q62018	Ctr9	Q62018	-3.13	0.00115176	-5.49891	-6.38476	-5.35536	-2.54902	-2.42358	-2.89061	26.8909	26.3065	26.6334	27.6607	26.7619	26.7681
Ctsa	G3X8T3	Ctsa	G3X8T3;P16675	-5.89	0.00150991	-3.03529	-4.97857	-5.6678	1.41345	1.40456	1.17417	25.9769	25.8086	25.9784	29.8629	30.1948	30.4986
Ctsb	P10605	Ctsb	P10605	-2.6	0.000446549	1.69971	1.89603	1.81955	4.71801	4.2273	4.27998	31.2531	30.8334	31.0776	33.1806	32.917	32.8109
Ctsd	P18242	Ctsd;Gm49369	P18242;F8WIR1;F6Y6L6;A0A1B0GT66	-2.42	0.000393874	2.58737	2.8228	2.50899	5.20369	4.98198	4.99596	31.3971	31.3959	31.384	33.8477	33.6417	33.6486
Ctsf	Q9R013	Ctsf	Q9R013	-2.93	0.00160138	-3.3021	-4.44231	-3.67083	-0.61513	-1.01414	-1.00229	27.5611	26.4939	27.1874	28.1212	27.6279	27.8894
Ctsl	P06797	Ctsl	P06797;A0A1Y7VP49	-6.21	0.00469204	-7.76722	-3.80153	-5.55588	0.279162	0.54708	0.688152	24.3521	24.3191	23.5057	28.7018	28.4618	28.65
Ctsz	Q9WUU7	Ctsz	Q9WUU7	-3.01	0.0565847	-6.13279	-7.0932	-3.26639	-2.18833	-2.78555	-2.48479	23.7662	25.0622	25.1218	26.0962	25.4097	25.6777
Cttn	Q60598	Cttn	Q60598;Q921L6	-0.0716	0.865544	3.39816	4.08761	3.22671	3.38289	3.83188	3.71242	32.8571	32.8984	32.7873	32.8573	33.0555	33.0306
Cttnbp2	B9EJA2	Cttnbp2	B9EJA2	-0.143	0.713069	-0.432775	0.394245	-0.379864	-0.0830243	0.0762432	0.0180781	30.9017	31.4869	30.8022	30.8049	30.8406	30.8298
Cttnbp2nl	Q99LJ0	Cttnbp2nl	Q99LJ0	0.8	0.300798	-0.296542	-1.89057	-0.411433	-1.80628	-0.948327	-2.24459	29.918	28.1643	29.4146	28.6421	28.3365	27.7249
Ctu1	Q99J10	Ctu1	Q99J10	-0.375	0.670527	-1.55837	-3.69281	-2.17711	-2.69378	-2.20908	-1.40165	27.6985	25.7901	27.5156	26.8387	26.6296	27.2874
Ctu2	Q3U308	Ctu2	Q3U308;G3UXB4	0.635	0.0586202	-0.141605	-0.490224	-0.0884257	-0.762286	-1.042	-0.819967	28.6999	29.1012	29.106	28.2907	28.6628	27.8383
Ctxn1	Q8K129	Ctxn1	Q8K129	-2.92	0.221246	-0.406147	-6.57315	-6.1937	-1.99857	-1.60818	-0.813291	26.6845	23.7702	23.7845	24.7703	25.0714	26.1762
Cuedc2	A0A494BB93	Cuedc2	A0A494BB93;A0A494BAT2;Q9CXX9	-3.77	0.082957	-7.04812	-2.68613	-7.83446	-1.40471	-1.75853	-3.10089	23.4687	24.7225	24.4054	26.0536	25.3037	24.387
Cul1	Q9WTX6	Cul1	Q9WTX6;Q3TPM3	-0.162	0.551619	0.904511	1.06001	1.33205	1.2483	1.2259	1.30852	31.1539	31.2354	31.4084	31.4197	31.1927	31.0422
Cul2	Q9D4H8	Cul2	Q9D4H8;E0CYT5	0.0908	0.754169	1.61604	2.12181	1.95736	1.7924	1.85167	1.77868	32.047	31.9258	32.1326	31.747	31.7124	31.6722
Cul3	Q9JLV5	Cul3	Q9JLV5;E9Q4T8	0.277	0.335272	2.17028	1.94733	1.98839	1.49526	1.8855	1.89535	32.2702	32.1315	32.2748	31.6336	31.5665	31.8075
Cul4a	Q3TCH7	Cul4a	Q3TCH7	-0.814	0.0612019	-1.41185	-1.54016	-0.710494	-0.375056	-0.387997	-0.456994	29.1009	29.3071	29.8848	29.6961	29.2992	29.0902
Cul4b	E9PXY1	Cul4b	E9PXY1;A2A432;J3QJX0	-1.21	0.0833768	-0.999021	-2.57587	-1.14742	-0.248654	-0.442937	-0.406065	29.8111	28.5531	29.7596	29.7069	29.4476	29.5506
Cul5	G3X914	Cul5	G3X914;Q9D5V5;E9PV12;E9Q6Z0	0.281	0.432389	1.57643	0.965609	1.0384	1.17331	0.876077	0.689209	31.8855	31.1759	31.5923	31.2876	31.0982	31.037
Cul9	E9QP09	Cul9;Cul7	E9QP09;S4R1Y1;Q80TT8	1.75	0.00141464	-1.79861	-1.37791	-1.65633	-3.40838	-3.40855	-3.27944	28.9161	28.4519	30.4702	28.768	28.1587	29.0447
Cuta	D5MCW4	Cuta	D5MCW4;Q9CQ89	-1.39	0.378292	1.29681	1.32075	-2.67263	1.78591	0.773281	1.56614	27.887	28.4494	27.64	27.4549	27.4763	27.0396
Cutc	D3YY50	Cutc	D3YY50;Q9D8X1	-3.53	0.000692331	-5.75533	-5.62632	-6.67555	-2.56912	-2.60317	-2.30251	23.5555	23.4617	23.3766	25.8692	25.6771	25.9415
Cux1	H3BKT0	Cux1	H3BKT0;H3BJN3;P70403;H3BLJ7;H3BJ26;E9QKE9;H3BK24	-2.02	0.0270134	-6.71504	-6.817	-6.29516	-3.76854	-5.68387	-4.30423	23.8417	23.9151	23.0078	26.1252	25.4296	25.5291
Cwc15	Q9JHS9	Cwc15	Q9JHS9;A0A1L1SVD8	-7.68	0.000186621	-6.66774	-6.05608	-7.81076	0.975394	1.07112	0.459942	23.8616	23.116	24.1957	28.5057	28.6041	27.9435
Cwc22	B1AYU4	Cwc22;Gm13695;Gm13697;Gm13693	B1AYU4;A2AK44;A2AK42;B1AYU7;Q8C5N3	-3.74	0.00948267	-7.7147	-4.98536	-6.5537	-2.22043	-3.10588	-2.70541	24.1402	23.8404	24.7966	27.3601	26.9553	26.6679
Cwc27	Q3TKY6	Cwc27	Q3TKY6	-5.22	0.000198421	-7.0583	-7.46467	-6.59205	-2.12529	-1.32356	-2.00669	23.7127	22.2891	23.7924	26.5005	26.9753	26.7085
Cx3cl1	O35188	Cx3cl1	O35188	-1.72	0.00245247	-0.391606	-0.00201924	0.127443	1.67962	1.76345	1.44709	28.3596	29.5226	29.0142	30.3402	30.1236	29.7706
Cxadr	P97792	Cxadr	P97792	0.592	0.0369041	5.853	5.86929	5.87169	5.30506	5.25788	5.25547	35.1006	34.6983	34.864	34.2403	33.997	34.0417
Cyb5a	P56395	Cyb5a	P56395;G5E850;E0CY88	-2.04	0.00842553	1.77287	0.705834	1.68655	3.05418	3.43669	3.80417	29.3281	29.1745	29.353	30.0525	30.2997	30.6557
Cyb5b	Q9CQX2	Cyb5b	Q9CQX2	-2.27	0.064437	0.143245	-2.75623	-1.13202	0.57494	0.785993	1.70561	27.5443	25.2554	27.0928	27.4768	27.2555	28.8599
Cyb5r1	Q9DB73	Cyb5r1	Q9DB73;G3UZG6	-1.08	0.00831107	1.49839	1.12083	1.10557	2.35182	2.30582	2.31852	30.0842	29.6642	30.1014	30.6266	30.3737	30.4841
Cyb5r3	Q9DCN2	Cyb5r3	Q9DCN2;F2Z456;A0A0A0MQM3	-0.638	0.0303604	4.54077	4.62755	4.61425	5.17862	5.24129	5.27796	32.9913	33.2753	32.9989	33.686	33.6603	33.6255
Cyb5r4	Q3TDX8	Cyb5r4	Q3TDX8	-2.04	0.0862604	-6.64497	-3.74042	-4.16082	-2.72903	-2.81954	-2.88919	24.33	26.3952	26.1949	26.4159	26.3353	26.2897
Cybc1	Q3TYS2	Cybc1	Q3TYS2;A0A0A0MQK0	-4.26	0.029248	-3.87191	-1.97489	-6.52593	-0.24682	0.376436	0.29123	26.7761	24.3751	22.9385	27.9295	28.1489	27.8132
Cyc1	Q9D0M3	Cyc1	Q9D0M3;A0A2R8VHK1	-0.934	0.0153279	3.31695	3.66367	3.71367	4.50967	4.60012	4.38595	31.9022	31.9112	32.0894	32.8344	32.7422	32.7479
Cyfip1	A0A0R4J119	Cyfip1	A0A0R4J119	-1.01	0.0707349	-3.54094	-4.68843	-3.59411	-2.85274	-2.93493	-3.01114	27.0539	26.8769	27.2632	27.4845	27.4768	27.3579
Cyfip1.1	Q7TMB8	Cyfip1	Q7TMB8;A0A0U1RQ05	-0.699	0.15825	-5.10391	-5.3267	-6.21463	-5.08243	-4.69124	-4.77482	25.6344	25.2552	23.7597	25.5164	25.8183	25.7019
Cyfip2	Q5SQX6	Cyfip2	Q5SQX6;F6QD74	0.321	0.238152	2.88043	3.11973	3.19536	2.60251	2.82415	2.80723	33.5375	33.6927	33.9378	33.3127	33.28	33.351
Cygb	Q9CX80	Cygb	Q9CX80	-0.365	0.183411	1.18116	1.2983	1.0097	1.68377	1.44137	1.45891	29.9246	29.3984	29.6383	29.9713	29.4352	29.4352
Cyhr1	Q9QXA1	Cyhr1	Q9QXA1	-4.4	0.00132393	-5.84964	-7.43618	-7.54163	-2.42954	-2.73691	-2.44664	23.6953	24.0691	23.7315	25.9765	25.7335	25.647
Cyld	Z4YJJ5	Cyld	Z4YJJ5;Q80TQ2;A0A1B0GSE5	-0.104	0.78588	-0.736588	-1.49628	-1.29988	-1.30997	-0.855557	-1.05384	29.6241	28.795	29.0657	28.8384	28.6314	28.6658
Cyp1a2	P00186	Cyp1a2	P00186	-4.04	0.029248	-7.78777	-4.02721	-7.84219	-2.5878	-2.43523	-2.50305	23.4681	23.7943	24.2607	26.8591	26.7748	26.9513
Cyp21a1	A0A0R4J048	Cyp21a1;Cyp21	A0A0R4J048;P03940	1.37	0.377548	-2.21443	-1.94575	-1.91918	-1.99116	-2.13621	-6.06837	27.2797	27.2726	27.3625	27.2747	26.9338	23.98
Cyp2c39	P56656	Cyp2c39;Cyp2c50;Cyp2c54;Cyp2c37	P56656;Q91X77;Q6XVG2;P56654	0.869	0.693583	-4.91784	-2.16388	-7.08441	-3.08552	-6.89855	-6.79019	NA	NA	NA	NA	NA	NA
Cyp39a1	A0A3B2W4C8	Cyp39a1	A0A3B2W4C8;A0A3B2WCK5;Q9JKJ9	-0.835	0.277751	-4.25844	-4.99463	-4.05933	-3.80859	-2.53527	-4.46281	24.8541	24.3446	24.8888	24.9624	26.091	25.2879
Cyp46a1	Q9WVK8	Cyp46a1	Q9WVK8	-1.52	0.00347037	0.117162	-0.0019129	0.333806	1.42159	1.69323	1.9003	30.0268	30.1127	30.2574	30.8079	30.8059	30.8963
Cyp4a10	A2A977	Cyp4a10	A2A977;O88833	5.83	0.000230775	-1.41562	-0.482117	-0.401421	-6.32174	-7.16715	-6.31299	27.6293	28.6077	28.7836	23.9911	24.2572	24.0954
Cyp4x1	A2A9Y7	Cyp4x1	A2A9Y7;Q6A152	-2.31	0.235416	-3.1555	-2.02802	-7.32916	-2.53007	-1.84841	-1.19558	26.4597	26.7478	23.8739	27.0197	26.6381	27.7182
Cyp51a1	Q8K0C4	Cyp51a1	Q8K0C4	-1.14	0.00903038	1.86805	2.20685	2.36311	3.20369	3.23238	3.41508	31.4523	31.4941	31.7702	32.3776	32.1775	32.3214
Cyth1	Q3TZ02	Cyth1	Q3TZ02;Q9QX11;A2A517	0.384	0.219135	-1.8601	-2.1473	-1.97229	-2.36967	-2.11415	-2.64702	26.9395	26.431	27.3768	26.855	26.3178	26.4576
Cyth2.1	A0A1B0GRX7	Cyth2;Cyth4	A0A1B0GRX7;Q99KH2;P63034;A0A1B0GRB2;A0A1Y7VIW9	0.161	0.594607	-0.176089	-0.345835	-0.0601308	-0.0947423	-0.614591	-0.357185	28.4624	29.3411	28.5738	28.3318	27.9431	27.9705
Cyth3	O08967	Cyth3	O08967;G5E8Q4	0.122	0.694068	-0.681312	-0.332534	-0.439452	-0.795154	-0.707917	-0.31747	28.5378	28.3648	28.5878	28.0752	28.0817	28.1245
Czib	Q8BHG2	Czib	Q8BHG2;A2A8E2;B7ZC72;B7ZC71;A2A8E4	0.867	0.24917	0.255136	1.38771	1.07377	-0.97245	0.696035	0.391024	28.7599	28.9743	28.4923	27.7964	28.2856	28.7513
D130043K22Rik	F2Z497	D130043K22Rik;Kiaa0319	F2Z497;Q5SZV5	-4.21	0.000453475	-7.36519	-6.36886	-7.1898	-2.51287	-3.18434	-2.60174	23.3747	23.3425	23.881	26.4835	26.2612	26.811
D17h6s53e	Q9Z1R4	D17h6s53e	Q9Z1R4	1.82	0.352502	-3.02163	-6.64077	-2.60623	-7.46303	-6.4753	-3.78265	NA	NA	NA	NA	NA	NA
D230025D16Rik	Q922R1	D230025D16Rik	Q922R1	0.91	0.0514107	0.0983678	1.02286	0.67108	-0.188756	-0.286846	-0.46235	29.2103	29.4955	29.5398	28.3941	28.1453	27.9079
D430041D05Rik	F6ZGR6	D430041D05Rik	F6ZGR6;D3YZ21;A0A2R8VHF1;A0A2R8VKG2	-0.633	0.051824	-1.80804	-1.48411	-1.73545	-0.918196	-1.21904	-0.99036	29.5787	28.9836	29.084	29.2802	28.9625	28.8489
D630045J12Rik	D3YTS3	D630045J12Rik;Kiaa1549	D3YTS3;Q68FD9	0.33	0.54298	-0.377147	-1.8532	-1.02672	-1.35441	-1.50024	-1.39377	29.709	29.1829	29.4044	29.1087	28.7781	28.938
D6Wsu163e	Q91YN0	D6Wsu163e	Q91YN0	-0.167	0.702573	-1.25001	-0.302754	-0.320778	-0.568644	-0.495737	-0.30672	28.8439	29.0191	29.1497	28.9164	28.7886	28.7513
Daam1	Q8BPM0	Daam1	Q8BPM0	0.815	0.0164539	0.514875	0.310616	0.256935	-0.464702	-0.395044	-0.503414	30.91	30.5822	30.9917	30.2141	30.1676	30.1832
Daam2	Q80U19	Daam2	Q80U19	0.159	0.945894	-3.99411	-1.61909	-6.95134	-3.44299	-2.64967	-6.95003	27.0519	27.434	24.2094	27.2113	27.7517	23.7767
Dab1	F6VRL0	Dab1	F6VRL0;F2Z465;P97318;A0A0A0MQI4	-0.0825	0.874032	-1.40705	-1.942	-1.26686	-2.13122	-1.15476	-1.0825	27.2253	26.6436	27.2353	27.2278	26.3451	26.8563
Dab2ip	F6RK07	Dab2ip	F6RK07;A2AUX5;A2AUX3;B7ZD29;Q3UHC7;F6QQP6	0.244	0.469605	-1.0258	-1.40746	-1.03217	-1.16909	-1.28828	-1.73886	29.7468	29.3301	29.4498	29.4471	29.0614	29.0043
Dact3	Q0PHV7	Dact3	Q0PHV7	-1.83	0.193443	-2.69809	-6.52724	-3.84575	-1.94612	-2.8753	-2.76555	26.4828	24.7841	26.1443	26.8727	25.8955	26.209
Dad1	P61804	Dad1	P61804	-1.39	0.0122882	2.01655	1.56355	1.72236	3.02046	2.82799	3.63311	28.542	28.9909	28.5911	29.7863	30.3658	29.9791
Dag1	Q62165	Dag1	Q62165	1.3	0.0523899	-0.896445	0.366959	0.510853	-1.42116	-1.29337	-1.19034	29.5433	29.9859	29.6124	29.2545	29.389	28.8106
Dagla	Q6WQJ1	Dagla	Q6WQJ1	-1.55	0.0145529	-4.01306	-3.89489	-3.68735	-2.00941	-2.97983	-1.9689	27.2186	26.463	26.9956	27.8827	27.4332	27.6008
Daglb	Q91WC9	Daglb	Q91WC9	-0.133	0.931646	-4.69686	-6.69377	-4.59635	-3.80647	-7.42509	-4.35769	25.1742	24.7495	25.1451	24.9621	24.1893	25.158
Dalrd3	Q6PJN8	Dalrd3	Q6PJN8	0.107	0.898465	-4.18125	-5.79492	-4.74993	-4.27197	-4.82331	-5.95078	25.7462	23.6332	23.7683	24.1114	25.0026	23.671
Dap3	G3X9M0	Dap3	G3X9M0;Q9ER88;A0A0R4J1B9;G3UWZ6;G3UWM7;G3UWJ4;G3UZC0	-1.77	0.00486232	0.34363	-0.337289	0.447827	2.13633	1.83624	1.78293	29.91	29.4418	29.9393	31.1927	30.6337	30.5565
Dapk1	Q80YE7	Dapk1	Q80YE7	-1.68	0.137347	-2.78523	-4.92776	-5.84119	-2.87633	-2.83992	-2.80508	28.2275	26.9776	26.4561	27.6568	27.497	27.6751
Dars	Q922B2	Dars	Q922B2	-2.59	0.000654994	0.85888	0.568496	1.2115	3.44759	3.32575	3.62884	31.2328	30.7785	31.5163	33.0535	33.0437	33.058
Dars2	Q8BIP0	Dars2	Q8BIP0	-1.85	0.00299691	-2.55535	-3.16295	-3.29027	-1.05812	-1.25272	-1.13446	27.5858	26.9736	27.5251	28.751	28.1694	28.4308
Dazap1	Q3UGB5	Dazap1	Q3UGB5;Q9JII5;D3Z4J1	-5	0.00314567	-3.63353	-1.41849	-1.09873	2.77559	2.76443	3.30757	24.0054	25.8423	29.2052	30.4605	30.5965	30.9404
Dbi	P31786	Dbi	P31786;Q4VWZ5;D3Z563;M0QWU8	-0.98	0.133971	3.78733	4.65092	5.44664	5.3517	5.69371	5.78096	30.2967	32.0536	32.637	31.2848	31.6827	31.7473
Dbn1	Q9QXS6	Dbn1	Q9QXS6;A0A0R4J1E3	-0.419	0.16311	4.51665	4.90322	4.51328	4.91859	5.17034	5.10091	33.8862	34.2493	33.8408	34.3992	34.6285	34.6454
Dbnl	Q62418	Dbnl	Q62418	0.0407	0.90992	3.40991	4.14105	3.8502	3.60144	3.91603	3.76171	32.7538	33.0078	32.8922	32.6884	32.7314	32.55
Dbt	P53395	Dbt	P53395	-1.68	0.00231581	-0.642249	-0.836467	-0.699354	1.25063	0.709977	0.914147	29.423	28.746	29.2412	30.5222	30.1085	29.9256
Dcaf1	Q80TR8	Dcaf1	Q80TR8	-1.4	0.313045	-5.22208	-7.2067	-6.20765	-5.66802	-2.75849	-6.02448	NA	NA	NA	NA	NA	NA
Dcaf17	F8WIJ2	Dcaf17	F8WIJ2;Z4YK64;Q3TUL7	-4.84	0.000386522	-7.10485	-5.75417	-6.488	-1.33826	-1.62393	-1.85533	24.2813	23.9193	23.9231	26.6918	26.4674	26.3722
Dcaf5	Q80T85	Dcaf5	Q80T85	-2.31	0.0143067	-7.06165	-6.03219	-7.35144	-3.86888	-4.43579	-5.20777	24.0971	23.9748	24.0285	25.5798	25.9833	25.314
Dcaf6	Q9DC22	Dcaf6	Q9DC22	-2.98	0.076526	-5.56386	-6.30245	-5.74766	-1.32774	-1.94193	-5.39488	24.129	24.2035	24.0031	28.3501	27.9139	24.4972
Dcaf7	P61963	Dcaf7	P61963	-1.74	0.00554009	0.508268	-0.367936	-0.101984	1.84492	1.55804	1.86149	29.5236	28.4903	29.151	30.3211	29.6024	29.9658
Dcaf8	Q8N7N5	Dcaf8;Pet2	Q8N7N5	-3.32	0.0342331	-2.70485	-6.34933	-5.18694	-1.70935	-1.19663	-1.36644	27.2186	24.2472	26.6906	27.7058	27.4503	27.9994
Dcakd	Q8BHC4	Dcakd	Q8BHC4	-1.99	0.00421648	0.383118	1.29562	0.573694	2.71617	2.96879	2.54532	29.3725	30.2382	28.8539	30.9038	30.8379	30.6384
Dcc	P70211	Dcc	P70211	-0.361	0.317808	-1.8945	-1.8498	-1.55355	-1.68895	-0.981751	-1.54456	29.3473	29.0078	29.0521	28.7692	29.1152	29.1282
Dclk1.1	H7BX36	Dclk1	H7BX36;Q1EDH1	-0.339	0.879185	-6.68256	-1.46052	-7.32808	-4.74543	-5.36186	-4.34725	23.6092	27.3295	23.7909	23.647	25.0702	23.7852
Dclk1.2	Q80VB6	Dclk1	Q80VB6	1.22	0.0234925	-2.5429	-1.77937	-1.91141	-3.66099	-3.01952	-3.22402	26.5224	27.003	27.0243	25.171	25.7232	25.4859
Dclk1.3	Q9JLM8	Dclk1	Q9JLM8	0.955	0.474447	-4.37531	-1.90428	-3.01799	-5.80022	-3.55396	-2.80987	24.6926	27.6349	26.901	23.6677	26.267	26.5776
Dclk2	A0A0A6YX71	Dclk2	A0A0A6YX71;A0A0A6YWI6;A0A0A6YX33	-1.34	0.073117	-3.17445	-4.22625	-4.96691	-2.48889	-2.90334	-2.94532	26.882	25.2624	24.7925	27.3343	26.8306	26.7558
Dclre1a	Q9JIC3	Dclre1a	Q9JIC3	0.935	0.0643798	-4.27459	-4.4202	-3.72308	-4.61512	-5.46359	-5.14405	25.7238	25.5096	25.9348	25.2241	24.7876	25.1114
Dcp1a	Q91YD3	Dcp1a	Q91YD3;A0A286YDC8	-4.89	6.86503e-05	-6.55328	-6.89495	-6.77837	-1.84131	-1.99033	-1.73898	24.1151	23.8938	24.1946	27.386	27.1867	27.1532
Dcps	Q9DAR7	Dcps	Q9DAR7;Q3TBW9	-7	0.00353294	-4.14117	-6.64448	-8.20559	0.800324	0.889604	0.312164	27.252	23.5671	24.3346	29.5256	29.134	29.6415
Dctn1	E9Q3M3	Dctn1	E9Q3M3;O08788;E9Q586;D3YX34	-0.0193	0.936024	3.63583	3.76097	3.65594	3.62515	3.75218	3.73336	34.3157	34.2231	34.1791	34.242	34.2884	34.2444
Dctn2	Q99KJ8	Dctn2	Q99KJ8	0.195	0.47861	4.7366	5.10914	4.95003	4.63685	4.68454	4.88877	33.7447	34.0326	33.9442	33.6234	33.5596	33.5246
Dctn3	Q9Z0Y1	Dctn3	Q9Z0Y1;E9Q919	-0.257	0.309716	3.31194	3.18774	3.03803	3.44929	3.49777	3.36121	31.3998	31.275	30.7204	31.6597	31.3013	31.4917
Dctn4	Q8CBY8	Dctn4	Q8CBY8	-0.317	0.29245	1.91565	2.17298	2.02836	2.05852	2.48088	2.52975	31.2667	31.4497	31.3583	31.0875	31.4655	31.6175
Dctn5	Q9QZB9	Dctn5	Q9QZB9	-0.433	0.128189	2.52778	2.65885	2.4268	2.79872	2.98546	3.12758	29.9604	30.2423	29.9463	29.8417	29.7485	29.8259
Dctn6	D3Z6H3	Dctn6	D3Z6H3;Q9WUB4;D3Z4E5	-0.613	0.261543	2.0725	2.4283	1.07155	2.28758	2.71835	2.40668	29.7199	30.0012	29.4646	29.2985	29.7916	29.3844
Dctpp1	Q9QY93	Dctpp1	Q9QY93	-1.26	0.128217	-5.31906	-3.6395	-3.63905	-2.47363	-3.55965	-2.77328	23.0559	24.4526	24.6064	25.4817	24.4928	25.0534
Dcun1d1	A0A1B0GXL7	Dcun1d1	A0A1B0GXL7	-5.29	0.000422912	-6.82703	-5.94643	-7.42327	-1.09309	-1.40248	-1.83323	23.6102	24.3773	24.3854	26.491	26.0923	25.6288
Dcun1d1.1	Q9QZ73	Dcun1d1;Tes3-ps	Q9QZ73;A0A140T8R8;A0A0G2JGV7;Q3UT23;A0A1Y7VP24;A0A0G2JDM0	0.377	0.438013	-0.872393	0.218922	0.117293	-0.703621	-0.282633	-0.681409	27.766	28.4479	28.3435	27.5993	27.9507	27.5874
Dcun1d2	G5E8Q5	Dcun1d2	G5E8Q5;G5E8Q6;A0A0N4SW97;Q8BZJ7;A0A0N4SW71	3.04	0.0831575	-2.29447	-1.88289	-0.95523	-2.24642	-6.56775	-5.43371	26.2656	26.3943	26.5973	26.2533	23.635	24.2024
Dcun1d3	D3YWG7	Dcun1d3	D3YWG7;Q8K0V2	1.64	0.0342993	-2.9758	-2.47364	-2.50618	-3.33821	-4.67263	-4.86629	25.1464	25.3657	25.4864	24.2254	24.9022	24.6758
Dcun1d5	A0A1N9M8A6	Dcun1d5	A0A1N9M8A6;Q9CXV9;A0A1L1SSU2	-4.37	0.00636051	-8.76821	-6.22148	-6.44461	-2.63225	-2.32935	-3.35598	23.9012	24.0376	23.8113	26.0052	25.8203	25.2046
Dcx	O88809	Dcx	O88809	-0.542	0.803354	-6.97873	-1.25584	-1.91251	-3.71512	-2.53001	-2.27509	23.9784	27.6005	27.0972	25.1909	26.2867	26.5089
Dda1	D3YXY5	Dda1	D3YXY5;Q9D9Z5	-6.11	0.000188507	-7.08317	-6.93411	-7.04563	-1.45327	-0.0854058	-1.19304	24.9656	23.5246	24.211	26.2827	26.6148	26.6678
Ddah1	Q9CWS0	Ddah1	Q9CWS0;D3YU15	0.473	0.101449	5.21345	5.02297	5.30993	4.69096	4.84804	4.58753	33.7204	34.0136	34.0757	33.3348	33.2868	33.2897
Ddah2	Q99LD8	Ddah2	Q99LD8;O08972;G3UZR0	0.164	0.538112	3.67964	3.82453	3.65724	3.39455	3.75641	3.51753	32.7005	32.4415	32.364	32.1056	31.9651	32.1739
Ddb1.1	Q3U1J4	Ddb1	Q3U1J4	-1.03	0.0133578	0.281432	0.688673	0.294542	1.26218	1.56646	1.53923	30.8733	31.1696	30.9065	31.711	31.7079	31.6496
Ddhd1	F8WHP5	Ddhd1	F8WHP5;E9QQ38;F8WIJ5;Q80YA3	1.03	0.432393	-2.15582	-2.70115	-2.75	-1.80211	-3.2761	-5.63048	27.8877	27.4386	27.4296	27.4361	27.1113	23.9856
Ddhd2	A0A1B0GS27	Ddhd2	A0A1B0GS27;A0A1B0GSA5;Q80Y98	-0.461	0.744007	-3.34435	-6.74794	-6.39442	-6.06437	-4.77443	-4.26379	NA	NA	NA	NA	NA	NA
Ddi2	A2ADY9	Ddi2;Ddi1	A2ADY9	-0.999	0.314467	-3.27223	-0.721333	-0.948967	-0.351809	-0.573343	-1.01904	26.7908	28.4818	28.2687	28.279	27.9126	27.9651
Ddn	Q80TS7	Ddn	Q80TS7	-5.97	0.00868043	-6.36687	-3.10123	-6.76329	-0.661719	1.38361	0.948411	23.551	28.2766	24.5011	29.5211	30.4991	30.2645
Ddost	O54734	Ddost	O54734	-4.84	0.000448484	-1.20263	-2.52951	-1.21214	3.15003	3.17633	3.25761	28.3901	26.3188	27.4828	32.44	32.19	31.8026
Ddrgk1	Q80WW9	Ddrgk1	Q80WW9	-4.81	0.022448	-7.32187	-6.78913	-3.02274	-1.32528	-0.244825	-1.13019	23.1072	24.2453	25.9308	27.5554	27.4891	27.2946
Ddt	O35215	Ddt;Gm20441	O35215;G3UZN1;G3UYJ7	-0.835	0.0842257	1.51944	2.24185	1.80146	2.2128	2.85969	2.99376	29.697	29.7336	29.6857	29.9727	30.6637	30.4122
Ddx1	Q91VR5	Ddx1	Q91VR5	-2.18	0.000482611	1.09677	1.17247	0.941877	3.11777	3.28665	3.36036	31.6768	31.4603	31.4936	32.9057	32.9408	32.8279
Ddx10	Q80Y44	Ddx10	Q80Y44	0.0533	0.938788	-7.09302	-5.76121	-7.48962	-6.98928	-7.09894	-6.41559	NA	NA	NA	NA	NA	NA
Ddx17	Q3U741	Ddx17	Q3U741;Q501J6;Q3TU25	-7.4	4.94181e-05	-4.31491	-4.65112	-4.06783	3.1793	3.09112	2.90574	23.9119	23.7018	24.2542	32.8103	32.4623	32.4292
Ddx18	Q8K363	Ddx18	Q8K363	-4.26	0.00150146	-7.63586	-7.52548	-6.35564	-3.62072	-2.34841	-2.76803	23.9198	24.356	23.981	26.8457	26.5882	26.8529
Ddx19a	Q61655	Ddx19a	Q61655	0.24	0.650282	-3.57834	-2.21624	-2.7737	-2.88271	-3.27398	-3.13305	26.0463	27.1255	26.7214	26.5087	26.0282	26.1363
Ddx19b	Q8R3C7	Ddx19b	Q8R3C7;Q8BZY3	0.364	0.342695	-0.442424	0.16699	-0.722569	-0.616205	-0.759103	-0.714008	29.2177	29.4619	28.9044	28.3493	28.5646	28.4297
Ddx20	Q9JJY4	Ddx20	Q9JJY4	-1.43	0.157021	-6.0155	-6.55376	-6.18376	-5.8216	-5.39729	-3.23322	23.7275	23.9489	23.4407	24.8357	25.1707	26.2122
Ddx21	Q9JIK5	Ddx21	Q9JIK5	-5.25	0.000196205	-7.13676	-6.92807	-6.0322	-1.62467	-1.46858	-1.26693	24.4081	23.175	23.8848	27.9399	28.7632	29.0704
Ddx23	D3Z0M9	Ddx23	D3Z0M9	-4.96	0.00235557	-6.5652	-4.51329	-6.63637	-0.514509	-0.852038	-1.45394	24.0649	26.8406	23.3406	29.1282	29.5696	27.9825
Ddx25	Q9QY15	Ddx25	Q9QY15	-0.625	0.574499	-3.19642	-4.07889	-5.98619	-4.62851	-3.77054	-2.98803	23.5861	24.5135	23.818	24.7396	25.5083	25.541
Ddx28	Q9CWT6	Ddx28	Q9CWT6	-0.935	0.467912	-5.05062	-5.71616	-7.12895	-3.84564	-4.40438	-6.8408	24.5416	24.2081	24.5806	25.5674	24.7034	23.7278
Ddx39a	Q8VDW0	Ddx39a;Ddx39	Q8VDW0	-6.8	9.62227e-05	-7.73298	-6.82709	-6.84007	-0.66873	-0.169489	-0.162126	24.0647	23.9217	24.3011	28.5349	28.3143	28.4619
Ddx39b	Q9Z1N5	Ddx39b	Q9Z1N5	-6.13	0.013028	-2.6532	0.428936	-4.77068	3.59274	3.7417	4.05504	26.9338	30.6408	28.2771	31.645	31.7307	33.298
Ddx3x	Q62167	Ddx3x;D1Pas1	Q62167;P16381	-4.98	0.000560696	-4.10336	-4.3436	-3.83442	-0.0493017	1.34646	1.36361	24.9186	24.5262	25.432	29.6396	31.1303	31.2258
Ddx3y	Q62095	Ddx3y	Q62095	-4.95	0.0017432	-5.22902	-6.50033	-7.58935	-1.58255	-1.36403	-1.52632	23.6521	23.492	23.0412	28.5889	28.4105	28.3068
Ddx4	Q3V086	Ddx4	Q3V086;Q61496	0.03	0.979796	-3.07598	-6.21194	-4.12667	-3.99083	-4.74137	-4.77254	27.1676	23.7738	25.9874	26.0195	25.1797	25.1158
Ddx41	A0A1S6GWJ4	Ddx41	A0A1S6GWJ4;Q91VN6	-2.96	0.00274864	-6.80283	-7.15819	-7.82277	-4.79893	-4.40048	-3.71218	23.4601	23.8137	23.9021	25.6423	25.695	25.7419
Ddx42	Q810A7	Ddx42	Q810A7	-4.93	0.000871008	-5.89963	-4.17854	-4.69485	-0.444984	0.226822	0.230373	24.4236	23.4591	24.6379	29.7474	30.1846	30.037
Ddx46	Q569Z5	Ddx46	Q569Z5;F8WHR6	-6.37	0.000747383	-5.55746	-5.87751	-7.8047	-0.10448	0.11306	-0.127069	27.2355	23.4574	23.7799	30.83	29.6326	29.664
Ddx5	Q8BTS0	Ddx5	Q8BTS0;Q61656;S4R1I6	-8.21	9.17543e-05	-3.23679	-4.69336	-4.09497	4.18127	4.30065	4.12577	25.9973	24.6901	24.1157	33.7473	33.7362	33.6745
Ddx50	Q99MJ9	Ddx50	Q99MJ9	-5.45	8.13564e-05	-6.89548	-6.96714	-7.39175	-1.88795	-1.65594	-1.35145	24.3936	24.4814	24.0598	28.6961	27.7956	27.7103
Ddx6	P54823	Ddx6	P54823	-2.97	0.000438288	0.391066	-0.13745	0.219955	3.40728	3.06792	2.89978	30.8327	29.9666	30.2755	32.4594	32.2599	32.2555
Decr1	Q9CQ62	Decr1	Q9CQ62	-4.18	0.00165515	-7.04642	-6.37055	-8.08537	-2.48272	-3.21743	-3.26693	23.9557	24.1186	23.6521	25.905	25.6055	25.9652
Decr2	A0A494B909	Decr2	A0A494B909;Q9WV68;A0A494BB28;A0A494BAS6;A0A494B8Z4	-2.49	0.0543035	-2.48048	-5.42426	-3.38608	-0.890677	-0.945544	-1.98684	27.1215	24.6463	26.863	27.6929	27.6878	27.3319
Def8	A0A0R4IZW6	Def8	A0A0R4IZW6;G3X9U5;Q99J78	-0.903	0.294304	-6.43245	-7.05117	-4.70393	-5.44702	-5.07163	-4.96124	NA	NA	NA	NA	NA	NA
Degs1	O09005	Degs1	O09005	-4.58	0.00153127	-6.65896	-5.92417	-7.22827	-1.08548	-2.62326	-2.35195	23.7062	24.095	23.6297	26.018	25.8757	26.1142
Dek	Q7TNV0	Dek	Q7TNV0;E9Q8Y1;D3YVJ6	-5.88	0.00158675	-7.1732	-4.58435	-6.3044	0.330461	-0.533435	-0.228491	23.7121	24.1735	23.9904	29.0854	28.4987	28.8156
Dennd1a	Q8K382	Dennd1a	Q8K382	-2.56	0.196599	-2.51151	-8.01943	-6.66103	-3.25556	-3.42937	-2.83288	27.7162	24.1776	24.692	26.7998	26.5488	26.8535
Dennd2c	E9Q4E4	Dennd2c	E9Q4E4;Q6P9P8	0.0247	0.969603	-3.53804	-4.46172	-3.61928	-3.09635	-4.42162	-4.17512	26.823	25.6165	26.6122	26.7657	25.7048	25.8651
Dennd4a	E9Q8V6	Dennd4a	E9Q8V6	0.391	0.660976	-5.08259	-6.18502	-6.4362	-5.61627	-5.73843	-7.52329	25.8968	23.6663	24.2941	25.4519	25.1053	25.0717
Dennd4b	A0A0R4J172	Dennd4b	A0A0R4J172;Q3U1Y4	1.25	0.11422	-3.57985	-4.35866	-3.68227	-4.24937	-4.96838	-6.1425	27.0351	26.1978	26.62	25.934	25.879	25.9063
Dennd5b	A2RSQ0	Dennd5b	A2RSQ0	-0.644	0.250041	-4.82586	-5.81141	-6.12474	-4.67257	-5.31814	-4.84066	23.9246	23.9749	23.792	25.677	25.238	25.4273
Denr	Q9CQJ6	Denr	Q9CQJ6;E9Q0G1	0.788	0.0157047	2.64484	2.56056	2.46052	1.78275	1.76503	1.75549	30.4126	30.4283	30.1908	29.5676	29.6092	29.5444
Depdc5.1	Q6GQV2	Depdc5	Q6GQV2;E9QAT3	-0.347	0.420597	-5.53946	-5.24596	-5.98109	-5.71132	-5.02082	-4.99234	25.4397	25.4438	24.2111	25.2359	25.5365	25.5343
Derl1	Q99J56	Derl1	Q99J56	-2.33	0.00373325	-0.700613	-1.64337	-1.07917	1.65988	0.950599	0.969608	27.7094	26.9788	27.4269	29.45	29.1268	28.7429
Derpc	P0CG14	Derpc	P0CG14	-1.98	0.0231203	-6.60686	-6.1931	-5.06051	-4.51441	-3.48554	-3.9065	23.8547	23.821	24.6941	25.7816	25.3068	25.6223
Desi1	Q9CQT7	Desi1	Q9CQT7;D6RDE8;Q3TCG9	-0.361	0.701871	-2.43235	-0.102254	-0.257613	-0.0982689	-0.717711	-0.89235	24.4787	27.3324	27.3304	26.964	26.6773	26.4699
Dffa	O54786	Dffa	O54786	-5	0.000193621	-6.9825	-6.89326	-7.73052	-1.90401	-2.14588	-2.56755	24.7186	24.2207	23.8937	26.6955	26.3354	25.8862
Dgcr2	A0A338P7A8	Dgcr2;Gm20518	A0A338P7A8;Q8C2R4;A0A0R4J1M6;E9QNU3;Q6P5A9;E9Q548;P98154	0.534	0.648559	-6.31736	-3.62625	-4.11594	-4.29762	-5.17138	-6.19395	23.8615	24.5429	24.0552	23.9126	23.7603	23.7845
Dgkb	Q6NS52	Dgkb	Q6NS52	-4.46	0.0012106	-5.18263	-6.02858	-6.99272	-1.35656	-1.52428	-1.92863	25.8926	23.5849	23.6632	28.5739	27.7029	27.6929
Dgkd	E9PUQ8	Dgkd;Dgkk	E9PUQ8	-1.71	0.00747043	-2.83802	-2.44485	-2.19762	-0.428692	-0.680807	-1.24418	27.8833	28.1796	28.2066	29.7813	29.2641	28.9337
Dgke	Q9R1C6	Dgke	Q9R1C6;F2Z490	-1.05	0.00796314	0.785896	0.799391	0.934556	1.86298	1.7376	2.07989	30.7334	30.0466	30.2085	31.0253	30.8946	30.91
Dgkg	Q8C413	Dgkg	Q8C413;Q91WG7	-3.85	0.0808225	-2.04174	-2.7688	-7.42434	-0.649889	-0.149726	0.100014	27.9636	27.3491	24.5978	28.9967	29.3077	29.3796
Dgkh	A0A2I3BQ48	Dgkh	A0A2I3BQ48;D3YXJ0;A0A2I3BQ43	0.124	0.799079	-3.72046	-2.75723	-2.82081	-3.39576	-2.83769	-3.43648	27.2885	27.1757	27.3684	27.3656	27.2204	27.4155
Dgkh.1	A0JP53	Dgkh	A0JP53	1.28	0.21209	-2.9919	-3.4868	-2.71243	-3.2715	-3.80578	-5.94492	27.3367	26.9417	27.5044	27.1183	26.7027	24.4876
Dgki	D3Z2W1	Dgki	D3Z2W1;D3YWQ0;D3Z519;S4R2G0	-0.214	0.437201	-0.664585	-0.311821	-0.498337	-0.408199	-0.306392	-0.117456	29.8002	29.7589	29.665	29.7268	29.4252	29.6324
Dgkq	Q6P5E8	Dgkq	Q6P5E8	0.534	0.770532	-1.99141	-6.68311	-2.53059	-3.30408	-5.04069	-4.46143	28.1625	23.6276	26.7567	27.4393	26.1737	26.325
Dgkz	A2AHJ7	Dgkz	A2AHJ7;A2AHK0;Q80UP3	-0.962	0.0773348	-1.7888	-2.80397	-2.03314	-1.07265	-1.00609	-1.66202	27.2512	28.1741	28.1282	28.7287	29.1448	28.1769
Dguok	Q9QX60	Dguok	Q9QX60;Q504N4;A0A0U1RPX3	-0.181	0.796222	-1.21266	-0.416933	-2.20731	-0.630095	-1.35525	-1.30767	27.0259	26.7186	26.4711	27.9446	27.087	26.8221
Dhcr24	Q8VCH6	Dhcr24	Q8VCH6	-1.31	0.013088	0.900752	1.66507	1.50496	2.5006	2.87703	2.61679	30.2361	30.4987	30.445	31.408	31.5922	31.4389
Dhcr7	A0A140LIT2	Dhcr7	A0A140LIT2;O88455	-1.56	0.00444819	1.91837	1.33456	1.96962	3.40214	3.25	3.26251	30.2305	29.7036	30.347	31.3545	31.4622	31.3269
Dhodh	O35435	Dhodh	O35435;E9Q1V3	-1.02	0.0708359	0.115676	-0.867715	-0.258412	1.15163	0.293974	0.593612	29.0271	28.5716	29.1373	29.5777	29.176	29.3008
Dhps	Q3TXU5	Dhps	Q3TXU5	-2.36	0.00625673	-3.64894	-3.23003	-2.71776	-1.23645	-0.16361	-1.12851	26.0701	26.1789	26.8362	27.6881	28.5046	27.6879
Dhrs1	Q99L04	Dhrs1	Q99L04	-2.56	0.00318631	0.562144	-0.259079	1.01143	3.16669	2.90343	2.91065	29.908	29.5875	30.3303	31.6778	31.5965	31.5319
Dhrs13	Q5SS80	Dhrs13	Q5SS80;B0QZT2	-1.67	0.00692362	-2.26593	-2.05968	-2.27392	-0.990254	-0.558581	-0.0292562	27.3893	27.2565	27.1955	27.9486	28.0198	28.413
Dhrs4	A0A2I3BRG8	Dhrs4	A0A2I3BRG8;Q99LB2	-4.86	0.000114911	-6.43464	-7.14413	-6.93667	-1.95099	-1.83745	-2.13298	23.6226	24.2222	24.0464	26.0058	25.5191	26.0281
Dhrs7	A0A1Y7VN19	Dhrs7	A0A1Y7VN19;Q9CXR1	-2.37	0.0787936	-2.59567	-6.06375	-4.13513	-1.61787	-1.72507	-2.33231	26.7525	23.2904	26.003	26.6644	26.5823	26.3812
Dhrs7b	Z4YKT6	Dhrs7b	Z4YKT6;Q99J47	-3.15	0.128222	-1.36937	-6.57175	-1.7425	-0.162206	-0.0830212	0.01109	27.4888	23.7137	27.0746	28.2024	28.019	28.5879
Dhx15	O35286	Dhx15	O35286;Q497W9;A0A0G2JG10	-7.86	0.000300717	-7.11088	-4.90513	-5.62431	1.6581	2.08298	2.19387	23.9332	24.9368	23.9319	31.9766	32.0755	31.1476
Dhx16	G3X8X0	Dhx16	G3X8X0;Q05BH3	-0.65	0.544754	-6.87606	-5.66863	-4.81931	-4.16506	-6.47983	-4.7696	23.4989	24.0055	25.4303	25.6177	25.0537	25.2007
Dhx29	Q6PGC1	Dhx29	Q6PGC1	-0.627	0.219443	-2.31363	-2.92797	-1.91019	-1.58403	-2.24756	-1.43793	28.6055	27.8241	29.1395	29.0308	28.7746	28.8052
Dhx30	A0A0G2JGU3	Dhx30	A0A0G2JGU3;A0A0G2JEN9	-7.17	0.000131339	-7.44928	-6.30465	-7.54065	0.422246	-0.059389	-0.132929	23.594	24.7003	23.919	26.0064	25.4354	25.3291
Dhx30.1	Q99PU8	Dhx30	Q99PU8;A0A0G2JGL8	-4.8	0.000969222	-5.14138	-3.60846	-3.37021	0.902388	0.671519	0.715368	25.1192	25.155	25.3777	31.3785	31.6105	31.7157
Dhx32	D3Z4E3	Dhx32	D3Z4E3;Q8BZS9	-4.84	0.00102567	-6.72128	-5.09616	-6.7783	-1.26897	-1.14085	-1.66952	23.4602	24.402	24.4788	28.2683	28.116	27.8291
Dhx36	Q8VHK9	Dhx36	Q8VHK9	-3.98	0.0129591	-3.52282	-6.72315	-4.23872	-0.760026	-0.827939	-0.953731	26.9016	23.7143	25.7876	29.3591	29.3163	28.9802
Dhx38	Q80X98	Dhx38	Q80X98	-3.96	0.0039392	-8.07268	-5.97138	-7.83749	-3.04485	-3.49149	-3.46969	24.6576	25.7206	24.2625	27.2905	26.6141	26.681
Dhx57	Q6P5D3	Dhx57	Q6P5D3	-1.91	0.0024023	-1.81716	-2.47654	-2.04719	0.0112786	-0.318985	-0.313014	29.5753	28.6606	29.2798	30.7135	30.3998	29.8188
Dhx8	A2A4N9	Dhx8	A2A4N9;A2A4P0	-0.0419	0.960524	-6.50353	-4.61255	-4.29692	-5.09953	-5.25935	-4.92847	23.8206	24.0395	22.8284	25.3671	25.1181	25.4162
Dhx9	E9QNN1	Dhx9	E9QNN1;A0A087WPL5;O70133;Q3UR42	-8.19	0.00058665	-4.04395	-6.03215	-3.11888	3.72432	3.7925	3.86825	26.9882	24.1298	25.7596	34.2257	34.2874	34.278
Diablo	Q9JIQ3	Diablo	Q9JIQ3;A0A0G2JGS0;Q8R1D8;D3Z3K5;D3Z2Q3	-2.41	0.0792302	-0.621605	-0.988944	-3.9283	0.605611	0.650498	0.446455	27.2589	27.4424	27.4251	28.9436	28.5076	28.5764
Diaph1	E9PV41	Diaph1	E9PV41;E9PXV7;O08808;F6XC54;D3Z074	0.343	0.243299	-0.00209612	0.444355	-5.42769e-06	-0.243743	-0.124509	-0.21818	30.7941	30.7017	30.8131	30.3806	30.2508	30.2523
Diaph2	Q6W4W7	Diaph2	Q6W4W7;E9Q4U7;O70566	1.4	0.119887	-3.22247	-2.75007	-2.83017	-3.67141	-3.62973	-5.70997	27.034	27.3249	27.3393	26.7817	26.564	26.7764
Diaph3	Q3UVP0	Diaph3	Q3UVP0;F8WIG5;Q9Z207	-0.756	0.308693	-5.45009	-7.23024	-5.42364	-5.23516	-5.52447	-5.07537	24.2942	24.3575	24.2426	24.3072	24.3552	24.7608
Dicer1	F8VQ54	Dicer1	F8VQ54;Q8R418	-2.51	0.0269449	-5.44405	-7.41185	-6.28119	-2.91326	-4.45157	-4.25387	26.689	24.0215	26.1297	28.1102	26.5805	26.8861
Dido1	Q8C9B9	Dido1	Q8C9B9	-1.08	0.0242168	-6.43784	-5.79617	-6.40245	-4.8466	-5.27942	-5.27297	23.2424	23.5615	24.0961	26.3978	25.7255	26.3404
Dip2a	F8WI56	Dip2a	F8WI56;D3Z7D3;Q8BWT5	0.0621	0.900305	-1.33585	-1.22448	-2.20043	-1.41693	-1.46756	-2.06258	29.8669	29.3659	28.8287	29.2824	29.0162	28.798
Dip2b	Q3UH60	Dip2b	Q3UH60;B2RQC7	0.128	0.645007	0.319549	-0.0106059	0.154565	0.211225	-0.080321	-0.0527611	31.3722	31.1851	31.41	30.6957	30.6343	30.6495
Dip2c	B2RQ71	Dip2c	B2RQ71;E9PWR4	-2.1	0.0356921	-5.68195	-5.17689	-7.40471	-4.10483	-3.83658	-4.00876	26.0771	26.1882	23.3078	26.3882	26.5479	26.6012
Dip2c.1	B7ZMZ7	Dip2c	B7ZMZ7	1.14	0.00905477	-5.95686	-5.85162	-5.85865	-6.74126	-7.28055	-7.05181	NA	NA	NA	NA	NA	NA
Dipk1b	Q99ML4	Dipk1b	Q99ML4	-4.7	0.000323934	-3.8697	-4.35203	-4.26931	-0.137371	0.727034	1.01326	25.0843	24.2788	24.8553	29.0377	29.6842	29.8853
Diras1	Q91Z61	Diras1	Q91Z61;D3Z0Z5	0.0182	0.954384	0.995165	0.94766	1.36017	0.815397	1.21676	1.21628	29.327	29.0604	29.4585	29.3939	29.2488	29.2137
Diras2	Q5PR73	Diras2	Q5PR73	0.426	0.114989	3.26931	3.55017	3.45247	2.97633	2.97208	3.04492	31.7972	31.9267	31.7951	31.2351	31.5288	31.4774
Dis3	A0A2I3BR78	Dis3	A0A2I3BR78;Q9CSH3	-2.48	0.0274793	-7.18087	-7.34064	-6.15826	-5.00952	-3.11894	-5.10247	24.0322	24.3712	25.6283	25.4224	25.1856	25.1771
Dis3l2	Q8CI75	Dis3l2	Q8CI75	-0.019	0.953519	-0.586375	-0.824569	-1.13067	-0.615345	-0.844302	-1.02504	29.6039	29.5913	29.7192	29.0788	28.9078	28.8838
Disp2	Q8CIP5	Disp2	Q8CIP5	-1.12	0.0313018	-1.64156	-2.33846	-1.45086	-0.435794	-0.832894	-0.817146	29.2718	28.6425	29.0422	29.6625	29.176	29.1325
Dkc1	Q9ESX5	Dkc1	Q9ESX5;B7ZCL7;F6YUI5	-6.23	0.000264055	-7.4559	-5.85224	-6.75639	-0.158677	-0.470816	-0.744095	23.2873	24.0031	24.1823	29.3924	28.8483	28.6239
Dlat	Q8BMF4	Dlat	Q8BMF4	-1.42	0.00901591	3.50324	2.77651	2.93099	4.72705	4.37826	4.37158	33.5429	32.7052	32.6057	34.2347	34.0347	34.0218
Dld	O08749	Dld	O08749	-1.41	0.00301925	3.44569	3.75122	3.59787	4.91533	4.92984	5.16899	32.9073	32.5222	32.738	33.8545	33.8487	33.8334
Dlg1	E9Q9H0	Dlg1	E9Q9H0;D3Z3B8;H7BWY4;Q811D0	0.423	0.144345	0.447443	0.836202	0.624476	0.0821686	0.250129	0.305454	30.2098	30.7384	30.6589	29.7857	29.9166	29.9546
Dlg2	A0A338P6J0	Dlg2	A0A338P6J0;Q91XM9;E9Q2L2;D3YUZ8;D3YWU0	0.353	0.192623	2.17028	2.50149	2.435	1.93998	2.09866	2.00857	32.6624	32.7104	32.6708	32.1342	32.3099	32.3264
Dlg3	Q52KF7	Dlg3	Q52KF7;A2BEE9;P70175;A2BEF2	-0.418	0.228134	1.81412	2.28563	2.16823	2.20666	2.535	2.78147	32.0656	32.054	32.3225	32.1682	32.2138	32.2907
Dlg4	Q62108	Dlg4	Q62108;A0A338P6E5;A0A338P6I6;G3UZL5	-0.798	0.0398876	1.35392	1.79226	1.2797	2.05768	2.36535	2.39727	31.5046	31.5737	31.0321	31.5698	31.6438	31.641
Dlgap1	D3Z709	Dlgap1	D3Z709;Q9D415;A0A3B2W7Z1;Q3UVU8;D3Z6F4;D3Z508;A0A3B2WD59;E9QAR5	-1.34	0.00696244	-1.94235	-1.57195	-1.40632	-0.385744	-0.0726388	-0.443312	28.6787	28.8993	29.094	29.1055	29.3218	29.2525
Dlgap2	Q8BJ42	Dlgap2	Q8BJ42;Q0VF59	-0.236	0.654068	-2.81304	-3.03671	-2.65576	-3.04514	-2.93439	-1.81856	26.8395	27.7995	27.2443	27.4508	28.2829	27.7954
Dlgap3	Q6PFD5	Dlgap3	Q6PFD5;B1AS06	0.264	0.597911	-2.01347	-2.19922	-1.12349	-2.26216	-1.64898	-2.21659	28.6874	28.3946	28.3943	27.957	27.8704	27.7644
Dlgap4	B7ZNS2	Dlgap4	B7ZNS2;B1AZP2	0.783	0.0287303	1.0516	1.21755	1.40553	0.319424	0.641293	0.364313	31.0479	31.2118	31.2396	30.7038	30.7177	30.586
Dlgap5	J3QPN1	Dlgap5	J3QPN1;A0A2I3BPW9;A0A0R4J0G7;Q8K4R9	-4.91	0.000357518	-7.28509	-6.42457	-7.38591	-2.34864	-2.44882	-1.57118	24.3633	24.1401	23.1206	24.7159	24.6211	25.5436
Dlst	Q9D2G2	Dlst	Q9D2G2	-1.43	0.00277355	2.49543	2.37954	2.4095	4.08039	3.70239	3.79781	31.848	31.8039	31.4714	32.9772	32.9055	32.9818
Dmac1	Q9CQ00	Dmac1	Q9CQ00	-1.66	0.507808	0.284159	-5.64785	1.06831	-0.333344	-0.175391	1.19338	26.2318	23.9183	26.841	26.6933	26.9451	26.8683
Dmac2	Q8CA44	Dmac2	Q8CA44;Q9D7K5;A0A0U1RNX2	2.56	0.260476	2.16103	1.98202	-3.58255	-2.58702	-3.10967	-1.42424	30.3276	30.0197	26.4122	25.587	24.975	26.5385
Dmac2l	Q9CRA7	Dmac2l	Q9CRA7	-4.02	0.0159267	-2.97304	-4.92602	-6.4882	-0.31132	-0.946578	-1.07405	26.2282	24.009	23.2642	27.39	26.9565	27.012
Dmd	A2A9Z1	Dmd	A2A9Z1;A2A9Z2;P11531	-1.42	0.055034	-5.17086	-6.47392	-6.30511	-4.17042	-4.33065	-5.17801	24.8757	23.0858	24.1105	23.4743	24.1982	24.3298
Dmtn	Q9WV69	Dmtn	Q9WV69	0.331	0.345251	3.06663	2.43323	2.62666	2.63507	2.1917	2.30592	32.0779	31.4574	31.9698	31.7847	31.6262	31.6329
Dmwd	E9Q6J8	Dmwd	E9Q6J8;Q08274	-0.203	0.73616	0.285721	-1.17881	-0.552248	0.15841	-0.419128	-0.576567	29.5265	28.8114	29.112	28.9839	28.6994	28.8196
Dmxl1	F8WGX5	Dmxl1	F8WGX5;Q6PNC0	0.591	0.50709	-2.51867	-2.99243	-2.95208	-4.76734	-3.22557	-2.24402	29.2208	28.5445	29.1806	28.1065	28.5135	28.6689
Dmxl2	Q8BPN8	Dmxl2	Q8BPN8;B0V2P5;F6RYL8	0.548	0.0559929	2.60849	2.79377	2.76885	2.08374	2.24366	2.1985	34.4573	34.3845	34.4517	33.8942	33.8191	33.7772
Dnaaf4	E9Q973	Dnaaf4;Gm44503	E9Q973;E9PYU5;Q8R368	-3.82	0.00316881	-6.52045	-6.4262	-8.14811	-2.75133	-3.29505	-3.59834	24.7555	23.2621	24.0183	25.9202	25.2872	24.9511
Dnaaf5	B9EJR8	Dnaaf5	B9EJR8;B2RY24	-0.638	0.51793	-4.59617	-4.97467	-7.26501	-4.87597	-4.91352	-5.13265	25.8262	25.0771	24.172	25.3131	25.1862	24.9043
Dnah11	H3BLD7	Dnah11	H3BLD7;E9Q7N9	-2.35	0.00125365	-5.99561	-5.68631	-6.42831	-3.77924	-3.48912	-3.8009	23.7844	24.3191	24.3722	27.4475	27.4016	27.3034
Dnah14	A0A140LIJ4	Dnah14	A0A140LIJ4	2.56	0.00987895	-4.05519	-3.80079	-3.19797	-5.62013	-5.88716	-7.22143	28.6263	28.5979	29.3539	23.9469	23.7281	23.8943
Dnah2	D3Z667	Dnah2	D3Z667;P0C6F1	-1.26	0.100202	-5.98285	-6.78751	-7.05263	-6.08105	-5.51712	-4.45814	27.0509	26.5072	25.6385	26.8853	26.648	27.1537
Dnah6	E9Q3H7	Dnah6	E9Q3H7;E9Q0B6	1.29	0.192002	-4.3594	-6.22466	-3.68451	-5.90161	-5.63893	-6.60271	NA	NA	NA	NA	NA	NA
Dnah9	B1AR51	Dnah9	B1AR51	-1.06	0.0510907	-6.38974	-6.17044	-5.90997	-5.69396	-4.98583	-4.60315	25.2578	24.8112	27.374	26.9467	27.5655	27.7264
Dnaja1	P63037	Dnaja1	P63037;B1AXY1;B1AXY0	-0.889	0.0297155	2.69378	2.98953	2.38245	3.42064	3.74629	3.56511	31.8563	32.3949	31.4814	32.1418	32.326	32.3775
Dnaja2	Q9QYJ0	Dnaja2	Q9QYJ0	-0.395	0.155736	3.27168	3.5344	3.64764	3.86601	3.93599	3.83785	32.7413	32.7472	32.7599	32.781	32.7404	32.5187
Dnaja3	Q99M87	Dnaja3	Q99M87	-0.925	0.0132676	-0.0597767	-0.0650599	-0.408634	0.717049	0.77041	0.754192	29.3852	28.6914	29.2682	29.9327	29.6696	29.8422
Dnaja4	Q9JMC3	Dnaja4	Q9JMC3	-0.655	0.245445	-2.44628	-0.964906	-1.4627	-0.958882	-0.863293	-1.08796	27.8077	28.4127	28.2193	27.8052	27.5226	27.6833
Dnajb1	Q9QYJ3	Dnajb1	Q9QYJ3;Q3TYL7	0.0464	0.872433	1.08338	1.43698	1.02688	1.06261	1.25363	1.09181	29.8264	30.3206	30.0324	29.7741	29.8308	29.7225
Dnajb11	Q99KV1	Dnajb11	Q99KV1	-3.4	0.00674861	-0.96948	0.0885588	-1.83974	1.73759	2.75536	2.99214	28.4846	28.8421	27.7027	30.3541	31.192	31.3373
Dnajb12	Q8C4C9	Dnajb12	Q8C4C9;Q9QYI4;D6RHR9	-3.8	0.051824	-2.03927	-6.65117	-3.18245	-0.596759	0.550912	-0.422843	26.7046	24.4093	26.8301	28.4571	28.5158	28.3783
Dnajb14	Q149L6	Dnajb14	Q149L6;A0A0G2JFJ4	-3.5	0.00171235	-6.85121	-5.32316	-6.35397	-2.4755	-2.7381	-2.80761	NA	NA	NA	NA	NA	NA
Dnajb2	Q9QYI5	Dnajb2;Dnajb6	Q9QYI5	0.603	0.152093	-0.391606	0.1994	0.19768	-0.408618	-1.01454	-0.380399	28.4315	28.5963	28.8007	28.2762	27.7033	28.152
Dnajb4	Q9D832	Dnajb4	Q9D832	-0.0711	0.813686	0.648483	0.841783	0.743032	0.513169	1.00364	0.929894	29.722	29.7982	29.682	29.1103	29.3414	29.546
Dnajb5	A2AG30	Dnajb5	A2AG30;O89114	-1.44	0.0661966	-1.97116	-0.938206	-2.30963	-0.223363	0.313855	-0.993957	26.733	28.0045	26.9295	28.3048	28.7656	28.499
Dnajb6	A0A0G2JER9	Dnajb6;Dnajb7	A0A0G2JER9;O54946;G3X8S5	-1.01	0.057343	-0.764999	0.338181	0.111644	0.781667	0.928491	1.00021	27.9238	28.6308	28.4825	28.3812	28.3771	28.4792
Dnajc10	Q9DC23	Dnajc10	Q9DC23	-5.86	0.0024328	-4.31627	-4.36532	-7.02234	0.817748	0.550109	0.495353	25.6412	25.8337	24.0192	30.1228	30.1761	30.4844
Dnajc11	Q5U458	Dnajc11	Q5U458;E9Q8B3	-1.68	0.00461489	0.545088	-0.0238255	0.588088	1.83039	1.99787	2.30824	30.4272	30.0559	30.4212	30.986	30.9136	31.1135
Dnajc13	G3X922	Dnajc13	G3X922;D4AFX7	-0.185	0.595964	-1.22721	-0.678465	-0.596862	-0.494795	-0.862927	-0.591056	30.8164	30.6114	30.835	30.6223	30.5482	30.5931
Dnajc15	Q78YY6	Dnajc15	Q78YY6	-1.6	0.223104	-6.19023	-6.24878	-7.48911	-5.61982	-6.44791	-3.07268	23.4181	23.4226	20.6581	22.4237	24.3566	24.8488
Dnajc16	Q80TN4	Dnajc16	Q80TN4	-5.08	0.00196813	-6.44551	-4.69487	-7.11964	-1.15621	-0.80283	-1.04722	23.5678	26.7552	24.6813	28.6901	29.1874	28.5556
Dnajc19	G3X8S1	Dnajc19	G3X8S1;Q9CQV7;D3Z5K6	-1.69	0.0221606	-2.43043	-3.12948	-1.80438	-0.335866	-0.83134	-1.13874	26.6979	25.716	27.1944	27.0393	26.92	26.9981
Dnajc2	P54103	Dnajc2	P54103;E9Q9H2;E9Q9H3	-4.79	6.92315e-05	-6.08032	-6.27305	-6.24578	-1.23513	-1.59615	-1.41225	24.8681	24.2015	24.7206	28.8573	27.0695	26.909
Dnajc27	Q8CFP6	Dnajc27	Q8CFP6	-1.14	0.602639	-1.43291	-6.7276	-0.799634	-2.22673	-1.70348	-1.61973	27.0829	23.0372	27.5185	26.1504	26.556	26.555
Dnajc3	Q91YW3	Dnajc3	Q91YW3	-5.14	0.00824129	-4.20905	-4.5023	-7.62425	-0.0852188	-0.127256	-0.699592	25.7399	25.1865	23.8434	29.2385	28.5407	28.2251
Dnajc5	P60904	Dnajc5	P60904;G5E8T0;A2AUE1	0.559	0.415544	4.03262	4.98333	4.25436	3.0589	3.80013	4.73378	31.5598	32.3283	31.7107	30.6914	31.2201	31.9494
Dnajc6	B1B0B8	Dnajc6	B1B0B8;B1B0B7	1.17	0.0390903	-1.64207	-2.71095	-1.78713	-3.00116	-3.30926	-3.33404	26.7603	25.4085	26.4856	25.1679	24.7705	24.7129
Dnajc6.1	Q80TZ3	Dnajc6	Q80TZ3	0.383	0.191166	2.14887	2.29475	2.05717	1.62196	1.6923	2.03655	32.3307	32.1344	32.3113	31.586	31.7629	31.8898
Dnajc7	Q9QYI3	Dnajc7	Q9QYI3;F7BTP8	-1.96	0.00164367	-1.22973	-0.625321	-0.676095	1.1338	1.13581	1.09406	29.4556	29.5432	29.8122	30.2865	30.2482	30.1015
Dnajc8	Q6NZB0	Dnajc8	Q6NZB0;A2ALF0;F6TQL3;A2ALF3	-5.63	0.0276957	-7.27623	-6.27132	-1.70967	0.0423796	1.11464	0.470296	24.8895	23.9176	26.7941	28.7793	29.1031	28.471
Dnal1	Q05A62	Dnal1	Q05A62	0.0722	0.872327	2.34785	1.3039	2.04128	1.81092	1.67011	1.99546	30.4169	29.6408	30.3227	29.9829	29.5101	29.7366
Dner	Q8JZM4	Dner	Q8JZM4	-0.868	0.060244	0.132913	0.637434	1.0929	1.60752	1.43517	1.42382	29.9513	30.1334	30.6436	30.6088	30.3092	29.9939
Dnm1	A0A0J9YUN4	Dnm1	A0A0J9YUN4;A0A0J9YUE9	0.276	0.29041	0.922696	1.25379	1.17976	0.853123	0.790426	0.884166	31.1965	31.5354	31.302	30.7338	30.8603	30.8284
Dnm1.1	P39053	Dnm1	P39053	0.821	0.0216626	1.35356	1.20088	1.5783	0.443147	0.669979	0.556026	31.27	30.7174	32.3625	29.3859	30.8107	30.7446
Dnm1l	E9PUD2	Dnm1l	E9PUD2	0.797	0.0340231	-1.16013	-1.40338	-1.187	-2.35398	-1.91471	-1.8728	29.3424	28.7471	29.1242	27.8545	28.2077	28.2541
Dnm1l.1	Q8K1M6	Dnm1l	Q8K1M6;A0A2U3TZ67	1.26	0.0245789	-0.769152	0.238363	-0.382809	-1.77112	-1.5779	-1.33355	29.6451	30.4052	29.9287	28.9108	28.6066	28.7586
Dnm3	E9QLL2	Dnm3	E9QLL2;Q8BZ98	0.329	0.222471	1.82862	2.03675	1.89227	1.41187	1.62205	1.73662	32.2047	32.2506	32.1747	31.5501	31.8358	31.9483
Dnmt1	J3QNW0	Dnmt1	J3QNW0;P13864	-0.105	0.879191	-4.92637	-3.09541	-3.62124	-3.6815	-3.70204	-3.94492	25.5735	27.1715	27.8561	27.5001	26.9837	26.7638
Dnmt3a	O88508	Dnmt3a;Dnmt3c;Dnmt3b	O88508	-6.65	0.000263457	-4.73002	-5.52262	-6.54306	1.21328	1.00062	0.953268	28.113	23.2375	23.8857	30.8993	30.5806	31.9433
Dnpep	Q3TVK3	Dnpep	Q3TVK3;Q9Z2W0;Q8BPW9	0.16	0.507241	3.74016	3.61951	3.55392	3.45701	3.42839	3.54684	32.915	32.5315	32.8063	32.263	32.3186	32.3323
Doc2a	Q7TNF0	Doc2a	Q7TNF0;H3BJT3;D3YYV2	0.174	0.696198	-0.707928	-0.808112	-1.15415	-0.828913	-0.702989	-1.6607	28.434	27.3571	27.32	28.1657	27.7059	27.6409
Dock11	A2AF47	Dock11	A2AF47;A2AF67	0.614	0.429881	-2.8184	-2.73617	-4.63528	-3.94072	-3.72374	-4.36678	28.2162	28.2122	27.6059	28.1951	27.6256	27.8075
Dock3	F8VPQ1	Dock3	F8VPQ1;Q8CIQ7	-0.134	0.61345	0.441239	0.418167	0.758059	0.72588	0.628819	0.663929	31.9362	31.789	31.9817	31.6892	31.7014	31.6317
Dock4	A0A1Y7VLY2	Dock4	A0A1Y7VLY2;P59764	-0.423	0.25522	-1.29648	-1.98398	-1.5315	-0.902041	-1.24586	-1.39468	30.1553	29.6357	30.1633	29.9204	29.308	29.4629
Dock5	B2RY04	Dock5	B2RY04	-1.14	0.0298571	-5.7978	-6.10312	-6.32393	-5.3424	-5.02028	-4.45554	23.5354	24.8397	23.8072	25.8533	25.9698	26.668
Dock7	E9PX48	Dock7;Dock8	E9PX48;A2A9M4;Q8R1A4;A0A0U1RNK7;A2A9M5	-0.584	0.136035	-0.733745	-0.269794	-0.634019	0.42091	-0.0103441	-0.295495	31.1947	30.9283	31.1851	31.3899	30.8991	31.0093
Dock9	A0A1D5RLE0	Dock9;Dock10	A0A1D5RLE0;E9QMR2;A0A1D5RMM1;F8VPN7;Q8BIK4	0.652	0.0681848	-0.416596	-0.859502	-0.578329	-1.2592	-1.50414	-1.04801	30.8981	30.6219	30.8863	30.338	29.9625	30.0049
Dohh	D3Z7J7	Dohh;Gm48551	D3Z7J7;D3Z6Y9;Q99LN9	-1.35	0.11919	-2.80767	-1.32799	-0.540765	-0.211491	-0.0357246	-0.377822	26.3709	26.358	26.7061	27.2383	27.4328	27.0467
Dok4	Q99KE3	Dok4	Q99KE3	-0.885	0.0459356	-2.5534	-2.9069	-2.35789	-1.33136	-1.95697	-1.87547	26.4495	25.9722	26.6527	26.8851	26.1961	26.1638
Dok5	Q91ZM9	Dok5	Q91ZM9	-3.7	0.00673439	-3.888	-6.25571	-5.79257	-1.80517	-1.7283	-1.29575	25.7081	23.6008	24.3532	27.0249	26.7321	26.7001
Dolk	Q8R2Y3	Dolk	Q8R2Y3	-4.58	0.000680617	-6.44388	-7.79858	-7.42055	-2.93097	-2.84445	-2.15781	24.1319	24.2807	23.3869	25.9876	25.8156	25.902
Dolpp1	Q9JMF7	Dolpp1	Q9JMF7;A0A140T8S3;A2AWJ3	-1.54	0.0393119	-0.829356	-1.57663	0.00317706	0.358346	0.885667	0.966426	27.244	26.9094	28.1625	28.191	28.5657	28.7138
Dop1a.1	H7BWZ9	Dop1a	H7BWZ9;Q8BL99	-0.664	0.179749	-4.52299	-4.71873	-3.98202	-3.19457	-4.18418	-3.85196	26.9068	26.6461	26.9154	27.6312	27.4554	27.488
Dop1b	A0A2I3BRZ2	Dop1b	A0A2I3BRZ2;Q3UHQ6;A0A2I3BQW4	-2.05	0.0645624	-3.84593	-5.26354	-2.46021	-1.58424	-1.89472	-1.93433	28.5495	26.62	28.2814	29.291	28.4019	28.4792
Dpcd	Q8BPA8	Dpcd;Gm17018	Q8BPA8	0.231	0.551154	-2.35789	-2.57065	-1.77605	-2.40987	-2.2686	-2.71897	26.3225	25.8269	26.7748	25.3484	25.4551	24.5038
Dpf1	D3YYG6	Dpf1	D3YYG6;D3YY44;Q9QX66	-3.45	0.0027753	-7.40623	-6.31259	-6.9277	-2.89934	-3.13113	-4.25566	NA	NA	NA	NA	NA	NA
Dpf2	D3Z5N6	Dpf2	D3Z5N6;Q61103;F8WIP7;A0A494BBF7	-3.58	0.000379567	-6.27148	-5.99578	-6.70074	-2.50855	-2.6064	-3.10062	23.6109	24.7871	23.6778	26.3468	26.1719	26.2707
Dph1	Q5NCQ5	Dph1	Q5NCQ5	1.38	0.0221545	-0.918966	-1.69027	-1.09236	-2.15909	-3.05731	-2.63076	28.527	27.6531	27.9093	26.923	26.3454	26.4326
Dph2	Q9CR25	Dph2	Q9CR25	1.55	0.515268	-1.75711	-6.40379	-1.76305	-2.31427	-5.24181	-7.01288	27.3421	24.5358	27.5266	26.7816	24.1762	23.8515
Dph5	Q9CWQ0	Dph5	Q9CWQ0;V9GXP1	1.47	0.0745024	-2.43869	-1.82915	-2.02366	-3.81134	-4.41072	-2.47058	25.9925	25.8845	26.2779	26.1837	24.4481	25.1563
Dpm1	O70152	Dpm1	O70152;A2BDX2	-2.31	0.00823726	-1.96462	-0.906207	-0.396813	1.32265	1.21871	1.11932	27.8464	28.5683	28.6967	29.9461	29.3436	29.5135
Dpm3	Q9D1Q4	Dpm3	Q9D1Q4	-0.582	0.486756	2.39575	0.363166	2.01495	2.75983	1.65163	2.10775	28.8402	27.6747	27.9373	28.9704	27.7795	27.6641
Dpp10	E9QN98	Dpp10	E9QN98;Q6NXK7;D3Z5I7	0.351	0.187614	1.47425	1.35667	1.6423	1.04132	1.24416	1.13484	31.8723	31.4615	31.6556	31.1999	31.2813	31.329
Dpp3	Q99KK7	Dpp3	Q99KK7;A0A494BBC1	0.418	0.126522	2.61591	2.61384	2.47677	1.98456	2.26128	2.20756	32.3737	32.3871	32.2777	31.7394	31.9402	32.0945
Dpp6	E9PWX1	Dpp6	E9PWX1;Q5U4C2;Q9Z218	-1.36	0.0884445	-4.88225	-6.41148	-6.75225	-4.38019	-4.87075	-4.72	NA	NA	NA	NA	NA	NA
Dpp7	Q9ET22	Dpp7	Q9ET22	-2.53	0.118327	-7.61606	-6.74764	-7.57275	-2.59785	-6.96813	-4.78706	23.6516	24.1107	24.5071	25.695	22.7725	24.9208
Dpp8	Q80YA7	Dpp8	Q80YA7	-0.242	0.548478	-0.194008	-0.736912	-0.654985	-0.752854	-0.00141078	-0.105135	29.7084	29.5964	29.8496	29.8869	29.3436	29.4375
Dpp9	Q8BVG4	Dpp9	Q8BVG4	0.414	0.143792	-1.82016	-1.60516	-1.87344	-2.03291	-2.33501	-2.17196	28.7812	28.1807	28.3563	27.9711	27.5674	27.6801
Dpy19l1	A6X919	Dpy19l1;Dpy19l2	A6X919	-0.515	0.257482	-2.57052	-3.59095	-2.60639	-2.47935	-2.38161	-2.36083	23.3254	24.0295	23.815	27.1415	26.8395	26.8937
Dpy30	Q99LT0	Dpy30	Q99LT0	-0.476	0.100119	3.66794	3.57489	3.8398	4.31322	4.17051	4.02613	30.5649	30.1322	30.442	30.9218	30.5637	30.5096
Dpysl2	O08553	Dpysl2	O08553	0.77	0.0295957	7.47143	7.94453	7.67471	6.88023	6.91928	6.97969	37.1689	37.3906	37.0201	36.3438	36.5245	36.4989
Dpysl3	E9PWE8	Dpysl3	E9PWE8;Q3TT92;Q62188	0.806	0.0510272	7.3889	8.17732	7.85614	6.96828	7.00304	7.03249	37.2247	37.9015	37.7132	36.4998	36.623	36.6912
Dpysl4	Q3TMU8	Dpysl4	Q3TMU8;A0A0R4J1N0;O35098	0.515	0.128766	4.89031	5.51989	5.09217	4.57645	4.65259	4.72749	34.6063	34.823	34.7558	34.0019	33.9665	34.0364
Dpysl5	Q9EQF6	Dpysl5	Q9EQF6	0.893	0.018342	7.39425	7.86134	7.62866	6.74182	6.65426	6.80911	37.0405	37.1975	36.9506	36.0739	36.2044	36.2806
Dr1	Q91WV0	Dr1	Q91WV0	-5.09	0.043144	-1.99953	-6.66488	-7.23295	0.49319	0.5398	-1.66158	26.3666	23.3744	24.0756	27.4204	27.4147	27.1235
Drap1	F6T9K1	Drap1	F6T9K1;D3YY09;Q9D6N5;D3YYC2;G3UXH5	-6	0.0182852	-2.45054	-6.08073	-8.00042	0.774629	0.471344	0.210015	24.0501	24.2233	24.8379	28.356	27.8743	27.7812
Drg1	P32233	Drg1	P32233	-1.88	0.000974868	-0.0225211	-0.366429	-0.0426117	1.80792	1.6978	1.69147	29.7456	29.2511	29.6195	30.8989	30.421	30.3918
Drg2	Q9QXB9	Drg2	Q9QXB9	-0.0295	0.91021	1.77573	1.91967	1.85397	1.72925	1.87218	2.03647	31.0034	31.0451	31.0254	30.8138	30.5424	30.5955
Drosha	Q5HZJ0	Drosha	Q5HZJ0	-0.36	0.746581	-8.07921	-6.72406	-5.18242	-5.69896	-7.145	-6.06288	23.4796	22.8927	24.3637	24.72	23.3215	24.2317
Dscam	Q9ERC8	Dscam	Q9ERC8;A0A3B2W3U6	-1.39	0.184378	-7.20404	-6.83982	-7.60496	-4.20579	-6.9094	-6.37678	NA	NA	NA	NA	NA	NA
Dsg3	A0A3Q4EGP6	Dsg3	A0A3Q4EGP6;Q3UFC6;O35902	1.67	0.0281662	-5.03871	-4.35942	-3.86269	-6.63445	-5.46465	-6.16025	24.9066	25.1049	26.3027	24.2331	24.5324	23.8383
Dsp	E9Q557	Dsp	E9Q557	0.588	0.258323	-5.83038	-5.26535	-6.62746	-6.41079	-6.44695	-6.63087	26.5584	26.1742	23.8596	25.6263	25.5636	25.4552
Dst.1	S4R1P5	Dst	S4R1P5;Q91ZU6;E9Q9X1;A0A087WSP0	-1.9	0.00867488	-2.69316	-3.40229	-3.02965	-1.70602	-0.623615	-1.08117	31.8288	31.3156	31.6793	31.5116	31.5088	31.5692
Dstn	Q9R0P5	Dstn	Q9R0P5	-0.311	0.399308	5.91343	6.11078	5.43872	5.83788	6.20784	6.34917	33.8295	33.97	33.5936	34.2097	34.1589	34.175
Dstyk	A0A087WP69	Dstyk	A0A087WP69;Q6XUX1	0.529	0.227908	-6.03672	-5.73824	-5.65017	-6.56076	-5.75397	-6.69758	NA	NA	NA	NA	NA	NA
Dtd1	Q9DD18	Dtd1	Q9DD18	0.0775	0.840722	0.911844	1.43158	0.632453	0.818186	0.788464	1.13682	28.8827	28.6188	28.6577	28.4294	28.313	28.4508
Dtd2	Q8BHA3	Dtd2	Q8BHA3	-0.344	0.291363	-2.01846	-1.38982	-1.48684	-1.26762	-1.34976	-1.24649	27.2342	26.7537	26.6776	26.7466	26.3084	26.4865
Dthd1	E9PZX1	Dthd1	E9PZX1	-0.788	0.447609	-4.92299	-6.75218	-3.7224	-4.36913	-4.23968	-4.42512	25.1249	23.6792	26.0394	25.6642	25.6843	25.5752
Dtna	A0A1Y7VJN9	Dtna;Dtnb	A0A1Y7VJN9;Q8CFR5;A0A1Y7VL34;Q9D2N4	-0.497	0.486343	-1.12374	-0.573433	-1.40156	-0.875662	0.517082	-1.24872	29.2518	29.016	28.9448	29.2047	29.0477	28.7093
Dtnb	G3UYK9	Dtnb	G3UYK9;G3UZJ3;G3UXK0;G3UY34;Q8K0N0;Q8C8Z9;G3UZ87;G3UYM7;O70585	1.42	0.376276	-3.49372	-3.16457	-2.83989	-3.97446	-2.58115	-7.18884	26.1532	26.0767	26.3954	25.5698	26.7433	23.7121
Dtx3	D3YV13	Dtx3	D3YV13;Q80V91;E9Q3J1	0.289	0.542887	0.814202	-0.283818	0.297096	-0.330694	0.0162916	0.27497	29.5276	28.3511	29.0379	28.9457	28.5894	28.6489
Dtx4	Q6PDK8	Dtx4	Q6PDK8	-0.564	0.566655	-7.01113	-6.9303	-4.97094	-5.12526	-6.73333	-5.36284	NA	NA	NA	NA	NA	NA
Dtymk	P97930	Dtymk	P97930;D3Z3R3	-4.05	0.0143067	-3.29088	-6.56959	-3.8741	-0.62787	-0.69107	-0.265967	25.8846	23.4965	26.3936	27.5142	27.9776	28.0292
Dus2	Q9D7B1	Dus2	Q9D7B1	-1.13	0.246858	-5.53235	-4.84244	-7.39297	-4.25365	-4.90093	-5.22289	24.2032	24.1114	24.7011	25.3729	24.6363	24.1726
Dus3l	A0A0R4IZY9	Dus3l	A0A0R4IZY9;Q91XI1	-6.49	8.89455e-05	-6.55965	-7.0925	-6.06284	-0.0184803	-0.249448	0.0186618	24.1002	24.6303	24.4483	29.5582	29.4513	29.2881
Dusp14	Q9JLY7	Dusp14	Q9JLY7	-2.19	0.0831319	-7.30006	-5.66137	-4.32579	-2.74167	-3.75976	-4.21841	23.0279	24.057	23.9474	25.5429	24.4355	23.944
Dusp15	Q8R4V2	Dusp15	Q8R4V2	-2.43	0.324191	-2.50277	-2.9835	-8.98615	-1.58255	-2.68333	-2.92855	26.2215	25.4579	24.415	26.9085	25.7183	25.4404
Dusp3	B1AQF4	Dusp3	B1AQF4;Q9D7X3;Q3V2Y9;H3BKD1;H3BKL8	0.635	0.105302	3.55319	2.90244	3.17103	2.27857	2.76745	2.6755	31.4297	31.1031	31.3285	30.2189	30.5151	30.3281
Dut	Q9CQ43	Dut	Q9CQ43;Q8VCG1	-5.43	0.00127837	-6.8495	-6.38795	-6.8643	-0.950652	-0.295514	-2.57106	23.4955	23.7225	24.0966	26.5886	27.092	26.8102
Dvl1	P51141	Dvl1	P51141	2.17	0.0742371	-3.2789	-2.7692	-2.77233	-5.22975	-6.59612	-3.49679	26.244	26.5667	26.4095	25.8145	23.4369	26.3368
Dvl3	E9Q150	Dvl3;Dvl2	E9Q150;E9Q967;Q61062	-1.56	0.213129	-2.90977	-5.96615	-2.84963	-2.73073	-2.00751	-2.29713	26.806	24.8027	23.6822	26.6057	27.276	26.7421
Dym	Q8CHY3	Dym	Q8CHY3	-2.42	0.0160623	-4.19539	-2.74412	-2.29919	-0.326024	-1.03883	-0.624225	25.4952	26.364	27.2016	29.1621	27.9169	28.1126
Dync1h1	Q9JHU4	Dync1h1	Q9JHU4	-0.256	0.272895	4.77191	4.79923	4.78376	5.0678	4.99982	5.05584	37.4942	37.428	37.506	37.5549	37.5234	37.5427
Dync1i1	D3Z0M6	Dync1i1	D3Z0M6;O88485;Q3TYJ3	-0.449	0.264623	2.38943	3.31826	2.91915	3.25292	3.50065	3.21937	31.7585	32.3773	31.9587	32.0285	31.946	32.0095
Dync1i2	Q3TPJ8	Dync1i2	Q3TPJ8;A2BFF9;O88487;A2BFF8;A2BFF5	-0.591	0.355553	2.14634	3.70665	2.83947	2.97611	3.72626	3.76386	31.807	32.6275	32.0944	32.0472	32.3491	32.4412
Dync1li1	Q8R1Q8	Dync1li1	Q8R1Q8	-0.161	0.536259	4.21342	4.09471	4.37826	4.46882	4.25148	4.45033	33.6624	33.6109	33.9279	34.0174	33.758	33.8898
Dync1li2	Q6PDL0	Dync1li2	Q6PDL0;A0A1D5RMC1;A0A1D5RM94	-0.279	0.271946	2.18484	2.13238	2.00141	2.3748	2.26882	2.51297	31.7626	31.5711	31.655	31.7552	31.5837	31.5931
Dync2h1	Q45VK7	Dync2h1	Q45VK7	-0.248	0.770516	-6.53134	-5.87026	-7.84308	-5.77845	-6.54076	-7.18008	25.0652	27.1579	25.2846	25.999	26.0808	25.8064
Dync2li1	Q8K0T2	Dync2li1	Q8K0T2	0.806	0.5651	-3.85882	-4.4489	-0.612333	-3.64954	-4.13392	-3.55609	26.3696	23.9792	27.5896	26.3576	26.0708	25.0626
Dynll1	P63168	Dynll1;BC048507	P63168;Q80ZS7	0.182	0.805665	4.54071	5.73137	4.62203	4.66934	5.64134	4.03675	32.0584	32.0899	32.0427	31.49	31.8079	31.7907
Dynll2	Q9D0M5	Dynll2	Q9D0M5;D6RIN4	0.163	0.760917	4.83987	4.60477	3.74613	3.76624	4.30036	4.63479	31.8974	31.596	30.624	29.978	31.2081	31.4904
Dynlrb1	P62627	Dynlrb1	P62627;A2AVR9	0.0617	0.816288	5.70958	5.44203	5.7426	5.67175	5.50995	5.52753	32.7397	32.8284	32.8307	32.6613	32.4621	32.5145
Dynlt1	P51807	Dynlt1;Dynlt1a	P51807;A0A338P7B7	-0.411	0.239255	3.61264	4.26396	4.22759	4.4457	4.56623	4.32535	30.9025	31.6128	31.5116	31.7853	31.4969	31.132
Dynlt3	P56387	Dynlt3	P56387	0.738	0.0516489	2.80577	3.34803	3.30367	2.24113	2.55016	2.45098	29.0831	29.7093	29.876	29.1959	29.5106	29.1778
Dyrk1a	Q61214	Dyrk1a	Q61214;F6U6X3	0.803	0.0938086	0.0293248	-0.91239	-0.449662	-1.08988	-1.58987	-1.06231	29.1438	28.0675	29.3035	28.7525	28.3388	28.4334
Dyrk2	Q5U4C9	Dyrk2	Q5U4C9	-1.92	0.0474614	-6.04957	-7.23993	-6.30511	-3.48068	-5.39545	-4.9454	24.26	23.6582	24.4285	25.9143	24.5649	24.9822
Dzank1	E9Q4Z6	Dzank1	E9Q4Z6;Q8C008	-3.39	0.00158768	-5.61653	-5.96592	-4.60358	-2.28986	-1.86507	-1.85659	23.9139	24.3975	26.3807	27.7382	27.7342	28.2808
Dzip3	E9QNZ2	Dzip3	E9QNZ2;Q7TPV2	-2.17	0.0107627	-4.98375	-5.13432	-5.59152	-3.86765	-2.36964	-2.95147	26.9487	25.9384	24.0909	26.5107	27.9381	27.3704
E0CYV9	E0CYV9		E0CYV9	-1.71	0.426614	-5.67652	-0.299613	0.0215186	-0.763953	-0.212956	0.160689	23.8307	30.6908	31.1651	30.2533	30.7376	30.9644
E3 ubiquitin-protein ligase MARCH1	D3YVY0	E3 ubiquitin-protein ligase MARCH1	D3YVY0;Q6NZQ8	2.25	0.0541154	-2.30273	-2.17475	-2.62007	-4.10194	-3.49467	-6.24115	26.9784	27.3623	26.8664	25.4847	26.0027	23.8711
E3 ubiquitin-protein ligase MARCH5	A0A0R4J1H0	E3 ubiquitin-protein ligase MARCH5	A0A0R4J1H0;Q3KNM2	-1.68	0.00881711	1.09334	0.111596	0.907416	2.19444	2.40011	2.5589	29.5566	28.6323	29.2588	30.5383	30.3011	30.3901
Ears2	Q9CXJ1	Ears2	Q9CXJ1	-3.77	0.00126508	-4.84593	-5.09613	-6.21939	-1.26652	-1.74014	-1.84805	25.8527	23.5001	24.8662	27.5883	27.3657	27.6737
Ebp	A2AC29	Ebp	A2AC29;P70245	0.681	0.879185	2.08842	-6.34975	2.17451	2.74451	-6.00735	-0.868091	28.2245	24.653	28.1997	28.4561	24.0983	28.1441
Ebpl	Q9D0P0	Ebpl	Q9D0P0	-3.01	0.462533	0.569824	-6.46018	-6.04872	-6.45949	1.55084	1.99319	NA	NA	NA	NA	NA	NA
Ece1	Q4PZA2	Ece1	Q4PZA2	-5.62	0.102097	-6.75796	1.386	-6.83659	1.62503	1.29417	1.71772	23.7185	31.2931	24.0927	31.5415	31.3315	31.5269
Ech1	O35459	Ech1	O35459;F7B227	-1.37	0.00859669	-1.76051	-2.42276	-1.71053	-0.601543	-0.605164	-0.574338	27.7019	27.1616	27.5412	28.2321	27.9347	27.8826
Echdc1	Q9D9V3	Echdc1	Q9D9V3	-1.09	0.155636	-3.63942	-2.78295	-2.98975	-1.15527	-3.04384	-1.93886	23.4227	26.8576	24.0692	27.1458	26.1642	26.6505
Echs1	Q8BH95	Echs1	Q8BH95	-1.33	0.00617464	3.55618	2.95885	3.36485	4.66132	4.65032	4.55548	32.19	32.5499	32.0723	32.9793	33.1333	32.8244
Eci1	P42125	Eci1	P42125;A0A3Q4EC00;A0A452J8A5	-4.02	0.0606169	-7.98885	-2.94688	-6.84246	-2.86052	-1.39929	-1.46542	23.0359	26.746	23.8522	26.4807	26.6109	26.8663
Eci2	Q3TCD4	Eci2;Eci3	Q3TCD4;Q9WUR2;E9PUY9;E9PYA9;E9PVM6;E9PYC6;E9Q858	-3.2	0.0597505	-6.4816	-2.80204	-2.62596	-0.848808	-0.889923	-0.572734	24.6432	27.165	26.5826	27.9044	27.5135	27.6348
Ecpas	Q6PDI5	Ecpas	Q6PDI5;A2ALV7	-0.558	0.0941069	0.442927	-0.0790147	0.374885	0.900623	0.782231	0.730977	31.9104	31.4678	31.7032	32.0158	31.6023	31.4527
Ecsit	A0A0R4J174	Ecsit	A0A0R4J174;Q9QZH6;J3KMM6	-2.16	0.0110787	-0.670243	-2.16939	-0.908664	1.09464	0.780082	0.864323	29.4096	27.9852	28.9275	30.1482	29.807	29.7849
Edaradd	Q5D0F1	Edaradd	Q5D0F1;Q8VHX2	-5.35	6.82373e-05	-6.9564	-6.56308	-7.02185	-1.62966	-1.3916	-1.46898	23.6037	24.2746	24.6871	26.695	26.7694	26.6905
Edc3	Q8K2D3	Edc3	Q8K2D3	-0.0021	0.998398	0.747084	-1.20832	-2.41627	-1.55631	-0.553694	-0.761203	30.6576	28.3779	26.715	28.027	28.1777	28.016
Edc4	A0A0R4J1Q0	Edc4	A0A0R4J1Q0;G5E896;Q3UJB9;D6RE33	-3.69	0.00071209	-2.23397	-2.39926	-3.41101	1.02075	0.977294	1.02122	28.9104	28.123	27.791	31.3233	31.4784	31.5
Edem3	A0A087WR24	Edem3	A0A087WR24;Q2HXL6;B7ZNP0;A0A087WQK5	-1.86	0.0166266	-5.55814	-6.28462	-6.49397	-4.70259	-4.50271	-3.54181	23.6562	23.8022	23.3692	25.7438	25.8543	25.5999
Edf1	Q9JMG1	Edf1	Q9JMG1	-2.56	0.0228066	-2.05539	0.0535802	-1.73442	1.06474	1.92379	0.948519	26.9586	28.3005	27.5131	28.4307	29.4087	28.1006
Edil3	Q8C4U8	Edil3	Q8C4U8;O35474;Q8C8K0	-0.63	0.147826	2.84989	2.37812	3.40838	3.45937	3.50952	3.55854	32.4491	31.8787	32.7616	32.5444	32.7372	32.7009
Edrf1	D3YZE7	Edrf1	D3YZE7;E9Q9F9;Q6GQV7	-0.715	0.706634	-6.83833	-6.44746	-7.4349	-9.34841	-4.09227	-5.13473	24.7067	24.1309	23.5279	23.0927	25.0712	26.3743
Eea1	Q8BL66	Eea1	Q8BL66	-2.23	0.00719844	-1.14559	-2.60055	-2.07267	0.258073	0.258882	0.353984	30.2668	29.1528	29.5271	30.8376	31.1274	31.1263
Eed	Q921E6	Eed	Q921E6	1.01	0.334068	-4.89475	-3.8465	-5.50351	-6.14475	-4.32606	-6.79751	24.2377	25.6278	23.8685	23.4961	24.3608	23.0447
Eef1a1	P10126	Eef1a1	P10126;D3YZ68	-0.264	0.507241	6.15541	6.98594	6.23468	6.52976	6.87266	6.76615	35.3334	35.6375	35.1951	35.4557	35.8452	35.7518
Eef1a2	P62631	Eef1a2	P62631	-0.599	0.0881187	4.5704	5.01644	4.7694	5.12533	5.59978	5.42879	33.4185	33.9064	33.6681	34.2258	34.49	34.4591
Eef1akmt1	A0A0D2X7Z2	Eef1akmt1	A0A0D2X7Z2;Q9CY45	0.686	0.800987	-1.4099	-6.00838	-1.52905	-2.09735	-7.19091	-1.71766	26.9798	24.325	26.3974	26.0614	24.7248	26.1902
Eef1akmt2	Q9D853	Eef1akmt2	Q9D853	0.294	0.540152	-1.54278	-0.720195	-0.984925	-1.75315	-0.838046	-1.539	26.9464	27.4485	27.156	27.4309	26.579	26.9568
EEF1AKNMT	Q91YR5	EEF1AKNMT	Q91YR5	-2.03	0.19376	-6.26839	-2.65774	-6.70964	-2.77373	-3.21734	-3.56669	23.4951	26.652	23.5038	26.2607	27.4156	26.2515
Eef1b	O70251	Eef1b;Eef1b2	O70251;A0A087WS46	-3.63	0.000113905	1.69115	1.6429	1.42883	5.18249	5.1315	5.33412	30.3092	30.098	30.0352	32.8753	33.3746	33.5018
Eef1d	A0A0R4J1E2	Eef1d	A0A0R4J1E2;F6ZFU0	-5.3	0.00832423	-2.86621	-6.8118	-4.9626	0.120018	0.589376	0.552379	27.2345	23.2003	25.6639	29.609	30.0609	30.0078
Eef1d.1	Q80T06	Eef1d	Q80T06;A0A0R4J1L2;Q91VK2;P57776;D3YY68;E9QN08;D3YUQ9;D3Z7N2;D3YZT9	-5.82	0.0288678	-1.57222	-5.68149	-7.77762	0.874697	0.771788	0.777729	27.3326	24.1332	24.4002	29.5463	29.354	29.3272
Eef1e1	Q9D1M4	Eef1e1	Q9D1M4	-4.14	0.000426765	-1.71157	-0.94688	-0.90183	2.47886	3.22813	3.16621	27.7776	27.7532	27.9475	30.4451	31.182	31.3035
Eef1g	Q9D8N0	Eef1g	Q9D8N0	-2.73	0.000339364	2.76636	2.72588	3.19794	5.62928	5.62394	5.62383	32.4739	32.1068	32.4756	34.6615	34.6576	34.7289
Eef2	P58252	Eef2	P58252	0.0225	0.926851	6.16565	5.96531	6.02538	5.99121	6.0163	6.08117	36.289	36.1163	36.0421	36.0668	36.0824	36.0447
Eef2k	F6ZEU2	Eef2k	F6ZEU2	-4.62	0.0019807	-6.75908	-6.76659	-7.56944	-3.56028	-1.52187	-2.15123	23.712	24.754	24.0111	25.223	26.1976	26.0748
Eefsec	Q9JHW4	Eefsec	Q9JHW4;A0A0N4SUV6;A0A0N4SWD9	0.772	0.0686943	-0.68421	-0.875974	-1.11056	-1.98365	-1.76605	-1.23646	28.8671	28.5702	29.0804	27.7106	27.8835	27.7753
Eepd1	Q3TGW2	Eepd1	Q3TGW2	-2.05	0.0146259	-3.81771	-5.34549	-4.12049	-2.55415	-2.09387	-2.49045	26.3541	25.8066	23.7406	27.3634	26.9166	26.8564
Efcab6	Q6P1E8	Efcab6	Q6P1E8	-1.79	0.149491	-10.1116	-7.43349	-8.99446	-8.28573	-6.10436	-6.76902	NA	NA	NA	NA	NA	NA
Efcab8	H3BJ05	Efcab8	H3BJ05;H3BL58	-2.86	0.118327	-6.43605	-1.65244	-2.66496	-1.08176	-0.657001	-0.42812	23.2763	26.3019	25.8723	26.8586	26.7798	26.8778
Efhd2	Q8C845	Efhd2;Efhd1	Q8C845;Q9D8Y0	-0.901	0.208209	0.018622	0.0525566	1.29676	0.574704	1.71477	1.7804	28.2257	28.5174	29.8637	28.9337	29.2693	29.2557
Efl1	Q8C0D5	Efl1	Q8C0D5	0.562	0.114989	-0.704345	-0.165227	-0.481522	-1.26349	-0.96796	-0.805491	29.9217	29.7938	29.8436	29.2721	29.3201	29.1439
Efnb1	P52795	Efnb1	P52795	0.818	0.0338068	1.09309	0.719926	0.527347	0.0774208	-0.177668	-0.0147446	29.8003	29.3064	29.7534	29.107	28.7558	28.8017
Efnb2	P52800	Efnb2	P52800	-0.664	0.0722859	0.66913	0.215953	0.862309	1.36414	1.16491	1.21183	29.6759	29.1804	29.6441	29.5654	29.2028	29.4179
Efnb3	O35393	Efnb3	O35393	0.449	0.429881	1.30054	0.380973	1.01016	1.17417	0.0429986	0.12714	29.6075	29.5726	29.8372	29.2075	29.0067	28.9234
Efr3a	A0A1D5RLL3	Efr3a	A0A1D5RLL3;Q8BG67	-0.201	0.573562	-5.30119	-5.75977	-5.09385	-5.05336	-5.45606	-5.04131	25.2441	24.5026	25.3218	25.2586	24.7666	25.1486
Efr3b	Q6ZQ18	Efr3b;Efr3a	Q6ZQ18;A0A1W2P7T9	0.339	0.35045	0.18784	0.441933	0.284536	-0.289369	-0.244626	0.430546	30.4311	30.479	30.5025	30.004	29.7945	29.9571
Eftud2	A2AH85	Eftud2	A2AH85;O08810;G3UZ34	-3.68	0.000198421	-1.87039	-1.85889	-1.59233	1.5366	2.05965	2.11563	26.8116	25.8158	26.7009	33.0821	31.4031	31.4074
Egf	P01132	Egf	P01132	-2.47	0.0302359	-6.04807	-5.51767	-8.01964	-4.15815	-4.05552	-3.96119	NA	NA	NA	NA	NA	NA
Egfr	Q01279	Egfr	Q01279	-1.29	0.310372	-4.47564	-6.2473	-6.25572	-4.43705	-5.90855	-2.76463	25.5006	24.6136	26.0973	26.7738	24.3178	27.0674
Egln1	Q91YE3	Egln1;Egln3	Q91YE3	1.17	0.210042	-1.37544	-1.54053	-1.44539	-4.10731	-1.5787	-2.17057	27.7557	27.8027	28.0728	26.5067	26.7361	27.2009
Ehbp1	Q69ZW3	Ehbp1;Ehbp1l1	Q69ZW3	0.00971	0.983413	0.493682	-0.0323261	-0.520869	-0.380573	0.0611333	0.230788	30.9686	30.7169	30.8263	30.4731	30.5407	30.4056
Ehd1	Q9WVK4	Ehd1;Ehd2	Q9WVK4	1.1	0.00551195	3.67697	3.86237	3.90656	2.78443	2.67337	2.69797	33.2682	33.2165	33.4072	32.3544	32.1022	32.1195
Ehd3	Q9QXY6	Ehd3	Q9QXY6	0.787	0.0447293	3.24176	3.00786	3.51503	2.72883	2.25067	2.42512	32.6451	32.4675	32.5599	32.0476	31.9335	31.8204
Ehd4	Q9EQP2	Ehd4	Q9EQP2	0.756	0.311542	-1.47529	-2.38493	-3.24421	-3.73924	-3.08277	-2.54954	27.3765	27.4969	27.2364	26.2858	26.3597	26.7529
Ehhadh	Q9DBM2	Ehhadh	Q9DBM2	-2.63	0.00129311	-6.23516	-6.07839	-6.78639	-3.48131	-4.11228	-3.60138	NA	NA	NA	NA	NA	NA
Ehmt2	A2CG76	Ehmt2	A2CG76;Q9Z148	-1.57	0.0704236	-6.75496	-5.95476	-6.55324	-3.68904	-5.27123	-5.58395	23.3231	23.9823	24.6951	26.3092	25.3254	24.98
Ei24	A0A0R4J250	Ei24	A0A0R4J250;Q61070;V9GXH2	-2.12	0.202279	-2.07969	-6.07532	-2.11467	-0.762643	-2.16412	-0.985945	25.8264	24.1007	25.1071	27.2667	25.9007	27.9828
Eif1	P48024	Eif1	P48024	-2.88	0.000612935	0.326259	0.064285	0.714724	3.55117	3.16196	3.04568	28.9235	28.3787	29.1824	29.8998	29.6313	29.4229
Eif1ax	Q8BMJ3	Eif1ax	Q8BMJ3	-3.48	0.00338039	-0.625063	-2.31195	-2.12871	1.67644	2.1296	1.56155	27.4261	25.7914	26.1195	28.9669	29.1429	29.0278
Eif1b	Q9CXU9	Eif1b	Q9CXU9;A0A1L1SSA3	-1.18	0.0469195	1.51655	0.640162	0.214297	1.97128	1.89022	2.05959	28.2444	28.0284	28.4131	28.6329	28.5348	28.6719
Eif2a	Q8BJW6	Eif2a	Q8BJW6	-3.37	0.0749614	-2.09677	-6.46337	-2.20189	-0.0925333	-0.107589	-0.461153	27.819	23.7278	27.9696	28.9332	29.3679	29.2151
Eif2b1	Q99LC8	Eif2b1	Q99LC8;D3Z151	-0.682	0.0261574	1.53571	1.39965	1.57031	2.17507	2.14472	2.23316	30.1176	29.9397	30.1653	30.7641	30.3716	30.4415
Eif2b2	Q99LD9	Eif2b2	Q99LD9;D3Z487;D3Z7J6	-0.428	0.173292	1.44587	1.78263	1.23241	2.03114	1.82823	1.88673	30.3266	30.6535	30.6287	30.5809	30.3918	30.2115
Eif2b3	B1AUN3	Eif2b3	B1AUN3;Q3UKV0;B1AUN2	-0.642	0.0375764	0.566863	0.726937	0.759243	1.42251	1.36104	1.19612	29.9999	30.2472	30.2997	30.1685	30.3158	30.1553
Eif2b4	D3Z780	Eif2b4	D3Z780;Q61749;A0A0J9YUY0	-0.89	0.0808234	0.209104	0.462503	-0.631788	0.785031	1.07085	0.853028	29.3112	29.8093	29.2776	30.1844	30.0093	29.9866
Eif2b5	Q8CHW4	Eif2b5	Q8CHW4	-1.16	0.00569696	-0.300863	-0.0424075	-0.355202	0.840618	0.904783	1.02399	29.8606	29.5076	29.6684	30.1975	29.8137	30.1352
Eif2s1	Q6ZWX6	Eif2s1	Q6ZWX6	-1.59	0.00258768	2.19265	1.8113	1.87822	3.35994	3.57645	3.70923	31.597	31.2357	31.3841	32.324	32.3719	32.4959
Eif2s2	Q99L45	Eif2s2	Q99L45	-2.39	0.000879129	0.440915	0.452643	0.389395	2.40995	2.94849	3.07956	29.932	30.0952	30.1845	31.5521	31.4255	31.4615
Eif2s3x	Q9Z0N1	Eif2s3x	Q9Z0N1;A2AAW9	-1.6	0.00505055	0.415273	0.706224	0.730977	1.79837	2.44378	2.40609	29.8618	29.8745	29.7191	30.8931	31.1706	31.0371
Eif3a	P23116	Eif3a	P23116	-4.03	8.13564e-05	-0.74941	-0.968954	-0.917954	3.04124	3.21618	3.20922	30.1905	29.4681	29.8802	33.6846	33.2924	33.5102
Eif3b	Q8JZQ9	Eif3b	Q8JZQ9	-2.96	0.00017537	0.141831	0.411795	0.276795	3.1567	3.24756	3.29763	30.8937	30.9544	31.0019	32.6034	32.7652	32.8497
Eif3c	Q8R1B4	Eif3c	Q8R1B4	-4.87	0.000489644	-1.78676	-3.2158	-3.07444	2.22853	2.26715	2.05047	28.9856	26.8722	26.8412	32.1543	32.1927	31.7799
Eif3d	O70194	Eif3d	O70194	-3.67	0.000321253	-0.604364	-0.133251	-1.0113	2.94742	3.09717	3.21376	29.4631	29.6797	29.4981	31.9102	32.2676	32.2122
Eif3e	P60229	Eif3e	P60229	-3.36	0.000494869	-0.693651	-0.0344999	0.162392	3.35134	2.95975	3.21425	29.8749	29.8045	30.3363	32.6099	32.1882	32.3671
Eif3f	Q9DCH4	Eif3f	Q9DCH4	-3.24	0.00020002	0.862427	0.455047	0.857467	4.12056	3.85416	3.93429	30.014	29.406	29.8583	32.5932	32.1689	32.1955
Eif3g	Q9Z1D1	Eif3g	Q9Z1D1	-4.19	0.000244525	-1.66261	-2.46435	-1.87243	1.8868	2.36555	2.3095	27.2186	26.9573	27.4882	30.5295	31.3261	30.8557
Eif3h	Q91WK2	Eif3h	Q91WK2	-4.69	0.00526741	-2.49727	-0.0613428	-2.74007	2.57156	3.36075	2.82579	27.0084	28.8865	26.7894	31.4157	31.9906	31.7453
Eif3i	Q9QZD9	Eif3i	Q9QZD9	-3.52	0.00139195	-0.71104	0.686893	0.148087	3.28456	3.8095	3.59902	29.1362	29.6071	30.0313	31.9982	32.2976	32.4163
Eif3j1	Q3UGC7	Eif3j1;Eif3j2	Q3UGC7;Q66JS6	-0.806	0.221178	0.84691	1.67162	0.821514	1.03601	2.27001	2.45314	29.242	29.9749	29.685	29.8649	30.1359	30.017
Eif3k	Q9DBZ5	Eif3k	Q9DBZ5;Q3TY56	-2.69	0.000384458	0.0290857	0.451906	0.297723	3.14647	2.88931	2.81115	29.2028	29.1415	29.1489	31.006	30.6438	30.5609
Eif3l	Q8QZY1	Eif3l	Q8QZY1	-4.38	0.000455727	-0.968048	-1.46652	-2.27803	2.6268	2.91491	2.88192	29.0409	28.2295	27.7941	32.2891	32.1249	32.0266
Eif3m	Q99JX4	Eif3m	Q99JX4	-3.58	0.000174406	0.0361465	0.605996	0.356259	3.96891	3.83179	3.95028	29.9851	29.9147	29.6838	32.564	32.2208	32.461
Eif4a1	P60843	Eif4a1	P60843	-1.95	0.0008657	2.0445	1.95269	1.75244	3.71903	3.8736	4.01172	31.5111	31.471	31.1304	32.703	32.771	32.8365
Eif4a2	P10630	Eif4a2	P10630;Q8BTU6;A0A338P6X5;E9Q561	-2.5	0.000406785	0.949148	0.905988	0.777855	3.12873	3.48232	3.53402	30.2108	30.4624	30.5058	32.1786	32.3094	32.4808
Eif4a3	Q91VC3	Eif4a3;Gm5580;Gm8994	Q91VC3;A0A0N4SVP8;E9PV04;A2AFK7	-6.76	0.00175639	-2.28276	-4.97942	-1.97841	3.66647	3.81536	3.56028	25.713	24.2221	25.7722	33.045	32.0653	32.9098
Eif4b	Q8BGD9	Eif4b	Q8BGD9;B2RWE8	-0.0355	0.916085	2.72386	3.27996	2.86347	2.79154	3.18758	2.99467	32.3902	32.3001	32.3756	32.1118	32.1259	32.0637
Eif4e	P63073	Eif4e	P63073;A0A0G2JGT5;A0A0G2JH04;A0A0G2JFB4	-1.66	0.00183869	1.81689	1.9296	1.64682	3.2376	3.57434	3.54901	30.5162	30.5074	30.2482	31.0053	31.3559	31.2402
Eif4e2	Q0P688	Eif4e2	Q0P688;Q8BMB3;M0QWD1;D3Z730;Q3UUT0;G3X9H1;D3Z729;D3YUV9	-2.57	0.105742	-5.9973	-1.91519	-2.95081	-1.57365	-0.636606	-0.938988	23.6472	26.6606	26.4805	26.8415	26.7856	27.2333
Eif4ebp2	P70445	Eif4ebp2	P70445	-1.14	0.551128	-1.75232	1.78208	-1.70824	-1.75421	1.82548	1.66452	25.065	28.3166	24.9795	24.8299	28.3203	28.1265
Eif4enif1	A8Y5K6	Eif4enif1	A8Y5K6;Q9EST3	-2.23	0.150989	-3.55693	-6.78871	-7.14943	-2.74304	-3.40388	-4.64901	27.0877	24.2234	24.6659	25.4046	25.9117	25.8576
Eif4g1.1	Q6NZJ6	Eif4g1	Q6NZJ6;E9Q9E1;E9PVC6;A0A0J9YUS5	-1.11	0.256635	-5.03104	-7.08477	-5.05589	-5.3932	-4.61893	-3.83494	25.9188	24.3639	25.8029	25.3524	26.0373	26.4154
Eif4g2	G3XA17	Eif4g2	G3XA17;F7CBP1	-2.61	0.0358568	-4.26931	-5.79324	-7.17474	-2.82949	-3.40566	-3.17659	26.1919	24.1248	23.3971	27.3984	26.733	26.9293
Eif4g2.1	Q62448	Eif4g2	Q62448	-2.22	0.198644	-4.04774	-5.90519	-8.33435	-5.37454	-3.25066	-2.98996	26.4135	24.0521	23.6357	24.2281	26.888	27.1159
Eif4h	Q9WUK2	Eif4h	Q9WUK2	0.2	0.639359	3.81533	4.52611	4.19384	3.51378	4.17164	4.24844	32.4261	32.5527	32.3467	32.0816	32.4923	32.4783
Eif5	P59325	Eif5	P59325;Q8BVV6;A0A1Y7VJG2;A0A1Y7VNP4	-0.185	0.580422	2.10224	2.72876	2.11431	2.45083	2.59007	2.45916	31.5408	31.714	31.5105	31.3709	31.3446	31.2205
Eif5a	P63242	Eif5a	P63242;A0A0A0MQM0;J3QPS8	-0.182	0.635549	4.83369	5.25389	4.40555	4.81432	5.09376	5.13169	32.5512	32.9755	32.2139	32.3482	32.4647	32.4065
Eif5b	Q05D44	Eif5b	Q05D44	-1.97	0.000964963	-1.09041	-1.52359	-1.22987	0.625967	0.64885	0.793604	29.9803	29.7576	29.5153	30.5608	30.4623	30.5227
Eif6	O55135	Eif6	O55135	0.297	0.454607	1.41842	1.29165	1.77392	0.85801	1.0694	1.6666	29.1669	29.1278	29.2826	29.1092	29.0885	29.0239
Eipr1	Q8K0G5	Eipr1	Q8K0G5;A0A1Y7VN36;A0A217FL60	-0.159	0.66676	1.04481	1.71831	1.46476	1.26812	1.66493	1.77289	29.9671	30.0943	29.7898	29.9393	29.8151	29.7815
Elac2	B1ATP7	Elac2	B1ATP7;Q80Y81	-3.68	0.0043185	-3.21824	-5.37556	-4.58693	-0.50422	-0.632853	-0.996175	27.7602	24.928	25.6815	29.3617	29.2397	29.1322
Elavl1	P70372	Elavl1	P70372	-9.37	0.00121931	-3.01085	-6.45565	-6.75424	3.67797	4.30268	3.92182	26.2528	24.6152	24.4213	32.2818	32.6144	32.5708
Elavl2	B1AXZ4	Elavl2;Elavl4	B1AXZ4;B1AXZ5;Q3UR02;Q80Y51;Q60899;B1AXZ6;B1AXZ0;Q80UJ0	-6.41	0.00483859	-7.06015	-6.58966	-3.30696	1.18511	0.433585	0.665267	24.138	24.0876	26.3632	29.6925	29.4786	28.8456
Elavl3	Q60900	Elavl3	Q60900;A0A1L1SS95	-5.73	0.000108011	-1.80095	-2.17926	-2.65395	3.26195	3.7427	3.54234	25.5405	25.3305	25.0895	32.0428	32.2249	32.1514
Elavl4	Q8BVA9	Elavl4	Q8BVA9;Q61701;A2A9S2;A2A9R8;A2A9R6;A2A9S0;A2A9S3	-7.48	0.000855065	-7.17676	-5.18622	-6.64319	1.62287	-0.119212	1.92212	24.009	25.3322	24.2245	30.6328	30.2803	29.0372
Elf4	Q3U1U8	Elf4	Q3U1U8;Q9Z2U4	-1.52	0.620999	-6.33015	-1.39568	-7.11405	-1.45751	-1.44783	-7.37022	NA	NA	NA	NA	NA	NA
Elfn2	Q68FM6	Elfn2;Elfn1	Q68FM6	-0.753	0.0806065	-1.03037	-1.82841	-1.70064	-0.937018	-0.784844	-0.579058	28.9251	28.9084	28.7232	28.6173	28.7898	28.8198
Elmo1	Q8BPU7	Elmo1	Q8BPU7	-0.489	0.559303	-1.78368	-2.08805	-1.93169	-2.15251	-0.0529313	-2.13147	28.5498	28.0666	28.2321	28.1523	29.0029	28.2693
Elmo2	F6XD63	Elmo2	F6XD63	-1.17	0.727622	-8.21319	-0.255081	-4.76473	-0.851591	-2.17664	-6.69131	23.5609	27.0867	23.6197	26.5398	25.1255	23.739
Elmo2.1	Q8BHL5	Elmo2	Q8BHL5	-0.877	0.134505	-0.486663	-0.481598	-1.75776	-0.0885729	-0.170055	0.164759	29.5573	29.642	29.4017	29.557	29.3099	29.2893
Elmod1	E9Q0K9	Elmod1	E9Q0K9;Q3V1U8	-1.12	0.0434473	-0.126876	-0.222003	0.199247	0.441907	1.2525	1.52818	28.8287	29.0802	28.8267	29.0492	29.1909	29.1992
Elmod2	Q8BGF6	Elmod2	Q8BGF6;A0A1B0GRZ8	-3.7	0.046893	-7.27831	-3.75254	-6.60262	-0.939102	-3.68428	-1.90356	24.3008	24.8663	23.6091	27.8383	25.2548	26.2413
Elob	P62869	Elob;Elobl	P62869;A0A3B2WBM3	0.0346	0.905239	4.05123	4.3675	4.37219	4.17075	4.41952	4.09679	32.1911	32.2298	32.4985	31.9988	32.0704	31.9762
Elobl	F8VPW8	Elobl	F8VPW8	-1.2	0.0425472	-1.71995	-0.950878	-2.18586	-0.407501	-0.247294	-0.616314	26.4948	27.0483	26.0978	27.2142	27.7123	26.9937
Eloc	A0A087WNT1	Eloc	A0A087WNT1;P83940;A0A087WQE6;A0A087WPE4	-0.559	0.151281	4.15233	4.67905	4.19176	4.53118	5.14437	5.0253	31.9877	32.2061	32.2372	32.2199	32.395	32.2639
Elovl2	Q9JLJ4	Elovl2	Q9JLJ4	-6.33	0.000229908	-7.0713	-7.65761	-6.07512	-0.434988	-0.572194	-0.804276	23.4867	23.5892	24.1916	26.773	26.4205	26.288
Elovl4	Q9EQC4	Elovl4	Q9EQC4	-5.64	0.0409849	-8.13844	-1.83467	-6.76068	-0.893216	0.7109	0.381072	23.7762	27.1174	23.9423	27.3121	28.2866	28.3451
Elovl5	D3Z136	Elovl5	D3Z136;Q8BHI7	-5.28	0.000998415	-5.44298	-7.49426	-7.07585	-1.37674	-1.32028	-1.46946	23.7776	23.8997	23.4711	26.003	26.0829	25.6907
Elovl6	A0A0G2JFE8	Elovl6	A0A0G2JFE8;Q920L5	-4.72	0.0033379	-6.92372	-5.90823	-8.55865	-2.64409	-2.24902	-2.34946	24.2032	23.5226	24.1254	24.7473	25.0531	24.9199
Elp1	Q7TT37	Elp1	Q7TT37	-0.716	0.0311113	0.866769	1.00546	1.24072	1.69855	1.81483	1.74723	31.8304	31.6794	31.9446	32.1698	31.9399	31.9659
Elp2	Q91WG4	Elp2	Q91WG4	-1.41	0.00461489	-0.523156	-0.929583	-1.09083	0.546849	0.510545	0.639716	29.2914	30.035	29.9163	30.1655	29.9684	29.9986
Elp3	Q9CZX0	Elp3	Q9CZX0;A0A286YDB8	-0.98	0.018732	0.239927	-0.0204823	0.55111	1.27918	1.34646	1.0846	30.217	30.0637	30.2268	30.5452	30.4594	30.2784
Elp4	Q9ER73	Elp4	Q9ER73;A2A414	-0.696	0.0833768	-1.34772	-1.70078	-1.59497	-1.14888	-0.429129	-0.978321	28.0659	28.1212	27.8637	27.9931	28.1814	28.5631
Elp5	Q99L85	Elp5	Q99L85;B1AR48;F8WIE7	-1.8	0.0107627	-3.26195	-3.47058	-3.91243	-1.21462	-1.71732	-2.32493	23.5738	26.3555	26.0736	26.2054	26.0012	25.4269
Elp6	A0A0G2JGK0	Elp6	A0A0G2JGK0;Q8BK75;A0A0G2JGM4;A0A0H2UH13	-0.355	0.815975	-0.593499	-3.8338	-3.40855	-0.667058	-3.11181	-2.9917	24.4436	23.6271	24.1183	23.4664	24.2221	24.1402
Emc1	Q8C7X2	Emc1	Q8C7X2;Z4YJW0	-2.86	0.000245936	-1.33955	-1.35899	-1.02264	1.54143	1.56123	1.74806	29.7647	29.4383	29.6987	31.463	31.5276	31.4388
Emc10	A0A0X1KG66	Emc10	A0A0X1KG66;A0A0X1KG67;Q3TAS6	-4.27	0.0413603	-4.06406	-7.37628	-2.35894	-0.595751	0.173729	-0.55771	25.8208	24.3799	26.5269	28.1879	27.3533	27.7478
Emc2	Q9CRD2	Emc2	Q9CRD2	-5.48	0.0334722	-1.54051	-2.78518	-7.43691	1.42408	1.57257	1.66956	27.7261	26.1987	23.9544	29.5729	29.8661	30.0003
Emc3	Q99KI3	Emc3	Q99KI3	-3.06	0.0013372	-0.584544	-1.42504	-1.77268	1.79948	1.67747	1.92377	28.4593	27.8812	27.6198	29.9973	29.7	29.8264
Emc4	Q9CZX9	Emc4	Q9CZX9	-2.82	0.00170187	-2.76306	-3.61463	-2.48987	0.0520579	-0.197319	-0.252069	25.9029	26.1759	26.0106	27.765	27.6452	27.6152
Emc6	Q9CQW0	Emc6	Q9CQW0	-6.21	0.000267434	-6.92712	-5.82567	-6.63902	-0.323168	0.413686	-0.860179	24.1985	24.0791	23.3284	26.4362	26.3772	25.7771
Emc7	Q9EP72	Emc7	Q9EP72	-4.86	0.0312795	-3.17776	-7.22865	-2.12815	0.765163	0.612025	0.655035	25.8043	23.9452	26.8071	28.6888	27.9189	28.5192
Emc8	O70378	Emc8;Gm27021	O70378;M0QWY0;M0QWP2	-3.57	0.0136433	-0.195684	-2.76772	-2.76952	1.30813	1.68908	1.97623	27.4064	25.4356	25.9625	28.3181	30.0965	30.0598
Emd	O08579	Emd	O08579;I7HJS1;Q3THM8	-1.07	0.020766	1.03515	1.2416	1.74535	2.22764	2.46619	2.54556	29.6161	29.6785	30.1558	30.4051	30.3869	30.3102
Eml1	Q05BC3	Eml1	Q05BC3;D3Z4J9;D6RII3	0.637	0.081412	0.823359	0.370003	0.310873	-0.288469	-0.221268	0.102445	30.1431	30.9145	30.5239	29.7149	29.5236	29.641
Eml2	E9QK48	Eml2	E9QK48;Q7TNG5;D6RGM3	-1.21	0.0970081	-0.163573	1.30708	-0.106569	1.25417	2.0553	1.35874	30.3142	30.9906	30.5019	30.9732	31.388	31.0501
Eml4	A0A0R4J1G7	Eml4	A0A0R4J1G7;A0A3Q4EHV9;A7ISP9;F8WJ93;A0A0R4J0H0;Q3UMY5	0.0431	0.919903	-0.23414	0.0470676	-0.29634	-0.516816	0.370476	-0.466333	30.0271	30.3135	29.981	29.8019	29.9131	29.7454
Eml6	Q5SQM0	Eml6	Q5SQM0	-1.19	0.215194	-8.12074	-5.45737	-6.48027	-5.23067	-5.77051	-5.49236	22.7615	25.552	24.1718	25.5807	25.6852	26.2316
Emsy	A0A0U1RPW3	Emsy	A0A0U1RPW3;A0A0U1RPK1;Q8BMB0	-0.0219	0.945894	-1.49964	-1.3724	-1.27231	-1.72713	-1.17357	-1.17801	28.588	28.4942	28.6843	28.1274	28.5915	28.5856
Enah.1	E9QLZ9	Enah	E9QLZ9;Q03173	-2.53	0.0266497	-5.92167	-7.17426	-4.90195	-3.64286	-3.99543	-2.75546	23.237	23.2552	24.5407	25.6961	25.2543	26.4614
Enam	A0A0G2JEP7	Enam	A0A0G2JEP7;O55196	-3.14	0.003544	-7.91021	-6.25866	-6.97727	-4.09917	-3.56823	-4.05564	24.4389	23.2545	24.8405	26.2277	26.4485	27.3077
Enc1	O35709	Enc1	O35709	-1.93	0.0397421	-6.42551	-4.31562	-5.40525	-3.72209	-3.04481	-3.57881	24.4516	26.3059	24.4407	26.526	25.9799	25.9157
Endod1	Q8C522	Endod1	Q8C522	0.261	0.499761	-0.161334	0.3526	0.267604	0.130634	-0.54539	0.0910962	29.0681	29.2476	29.0443	29.1946	28.6719	28.9798
Endog	O08600	Endog	O08600	-3.7	0.0208157	-3.87993	-5.78292	-7.40225	-1.57689	-2.13788	-2.24812	25.725	24.2672	23.8381	26.9903	26.3492	26.2021
Eno1	P17182	Eno1;Eno2	P17182;Q6PHC1	0.445	0.115735	7.83559	8.05077	8.19609	7.56764	7.54024	7.64062	37.1708	36.984	37.244	36.6004	36.4105	36.3668
Eno2	P17183	Eno2;Eno3	P17183;A0A0N4SUX5;D3Z6E4	0.0324	0.908454	5.4494	5.40014	5.26024	5.10997	5.40348	5.49913	34.5148	34.457	34.5436	34.0964	34.0967	34.1235
Eno3	P21550	Eno3	P21550;Q5SX59	0.578	0.734617	-3.46337	-5.51551	-3.04445	-2.79637	-6.9812	-3.98109	25.6759	23.6918	25.9652	26.1096	24.3167	24.8029
Enoph1	Q8BGB7	Enoph1	Q8BGB7	0.356	0.219133	3.05728	3.5247	3.39789	2.90002	3.00896	3.00316	31.2426	31.3733	31.542	31.2234	30.9657	30.9399
Enox1	Q8BHR2	Enox1	Q8BHR2;A0A2I3BQT0	-3.02	0.0312381	-5.24678	-5.8726	-7.94893	-2.97262	-2.72155	-4.31256	23.4527	23.815	23.3749	26.3743	26.0594	25.9752
Enpep	F6YHW2	Enpep	F6YHW2;F7B9G4;P16406	0.269	0.36142	1.0936	1.00512	0.724553	0.898798	0.583563	0.534292	29.1928	29.0072	28.9435	28.9788	28.7766	28.3284
Enpp4	Q8BTJ4	Enpp4	Q8BTJ4	-0.726	0.581862	-5.45538	-7.80647	-5.1629	-6.94064	-4.62886	-4.67604	24.0952	23.3441	23.9317	24.2309	24.1022	24.1227
Enpp5	Q9EQG7	Enpp5	Q9EQG7	-4.9	0.0178948	-2.99419	-5.68171	-7.19084	-0.102708	-1.35568	0.296761	27.3212	23.8849	24.0775	28.2193	27.5077	28.5133
Ensa	P60840	Ensa	P60840	0.111	0.850123	3.24316	1.81426	2.64813	2.81855	2.15546	2.39945	31.0141	29.9007	30.6198	30.514	29.8985	30.0351
Entpd3	Q8BFW6	Entpd3	Q8BFW6	0.386	0.826447	-6.76043	-2.83266	-6.57772	-4.34268	-6.97584	-6.0104	22.5805	26.2254	22.6336	24.765	24.0897	23.6925
Entpd4	Q9DBT4	Entpd4	Q9DBT4	-3.28	0.00860943	-4.97663	-6.00011	-6.81691	-1.76813	-3.28125	-2.91642	26.5797	24.7039	24.298	27.0238	26.2927	26.0167
Entpd5	Q3TQC7	Entpd5	Q3TQC7;Q9WUZ9	-6.11	9.57837e-05	-7.11729	-6.57843	-6.75586	-0.319441	-0.642202	-1.16602	24.3218	24.2293	24.288	28.5151	28.3132	28.0919
Entpd6	Q3U0P5	Entpd6	Q3U0P5	-5.76	0.00373325	-6.46046	-3.35518	-5.9783	0.626922	0.843798	0.0149497	23.6212	26.4113	23.8611	29.7897	29.5904	28.6499
Eny2	A0A2I3BRK6	Eny2	A0A2I3BRK6;Q9JIX0	-2.87	0.204887	-0.478345	-6.52764	-1.34564	0.526506	0.260873	-0.517731	26.8979	24.7259	26.7623	27.0102	26.6855	26.2674
Ep300	B2RWS6	Ep300	B2RWS6	-0.379	0.278372	-6.54289	-5.97895	-6.56811	-5.75121	-6.08135	-6.12155	23.5502	23.5544	24.2138	24.9826	24.5632	24.4902
Ep400	Q8CHI8	Ep400	Q8CHI8	-0.376	0.502607	-7.5946	-6.39966	-6.86272	-6.06602	-6.63362	-7.0287	23.9097	23.9788	24.3411	24.8387	25.1488	24.721
Epb41	A2A841	Epb41;Epb41l2	A2A841;P48193;A2AD32;A2A842;A2A839;A2A838;A0A1D5RLV1	-0.189	0.828134	-1.12055	-2.77188	-3.10131	-2.8404	-1.57549	-2.01215	29.1009	27.9616	27.2289	27.4831	28.2335	27.4922
Epb41l1.1	A2AUK5	Epb41l1	A2AUK5;A2AUK8;Q9Z2H5;A2AUK7;E9PV14	0.487	0.11735	3.86508	4.30207	3.83372	3.50904	3.51919	3.51266	34.0148	34.2273	34.1528	33.7086	33.6436	33.5425
Epb41l2	O70318	Epb41l2	O70318;A0A1W2P6I5;Q80UE4;Q80UE5	-2.56	0.00867488	-6.8071	-5.05057	-5.66004	-3.11107	-3.17825	-3.56208	23.3786	23.2463	26.1958	27.3154	26.9489	26.445
Epb41l3.1	Q9WV92	Epb41l3	Q9WV92;A7YY80;A0A3B2WD96;A0A286YD84	-0.507	0.33522	-4.18222	-3.44404	-4.13793	-3.09006	-3.06932	-4.08301	26.5455	27.1153	26.5746	26.3431	26.5281	26.4038
Epb41l5	Q8BGS1	Epb41l5;Epb41l4b	Q8BGS1	-1.46	0.0743965	-5.50046	-5.72088	-7.0184	-3.8874	-4.97112	-4.99611	24.11	23.7745	23.2076	25.753	24.2479	24.5222
Epdr1	Q99M71	Epdr1	Q99M71	-5.42	0.000422912	-6.09904	-6.34571	-4.95704	-0.849314	-0.26421	-0.0198829	23.6204	23.3378	23.0993	27.1153	27.3777	27.8659
Epg5	Q80TA9	Epg5	Q80TA9	-0.388	0.745945	-4.49312	-7.0856	-4.26199	-3.95795	-5.4041	-5.31319	26.8473	26.1107	27.0403	27.4462	26.3583	26.3332
Epha10	F6WVB0	Epha10	F6WVB0;Q8BYG9	-0.948	0.313543	-6.39922	-4.80299	-3.81165	-3.61964	-4.44585	-4.10373	24.1339	25.7743	25.7981	26.2264	25.5253	25.727
Epha3	B7ZNN5	Epha3	B7ZNN5;Q8BRB1;P29319	1.77	0.135256	-3.43117	-2.95864	-5.95839	-5.71932	-6.24925	-5.68125	26.7149	26.1629	23.3394	25.8677	26.469	24.3563
Epha4	Q03137	Epha4	Q03137	0.603	0.0601785	1.51176	1.73411	1.65766	0.870001	0.967026	1.25861	31.6551	31.989	32.0082	31.2656	31.1739	31.2994
Epha5	E9PUQ0	Epha5;Epha8	E9PUQ0;Q60629;E9PUQ4;E9PUQ2;E9PUP9;Q6PFV6	-2.13	0.0316212	-2.68313	-3.84123	-4.97192	-1.65917	-1.76047	-1.68152	27.8638	27.134	26.2096	28.7687	28.348	28.4745
Epha6	G1K381	Epha6	G1K381;Q62413	-0.651	0.126783	-5.35532	-5.77844	-5.77983	-5.44702	-4.90585	-4.60766	25.4705	23.7948	23.4758	25.1456	24.7948	23.7493
Epha7	A2BDQ4	Epha7	A2BDQ4;Q61772	0.32	0.836151	-3.19298	-5.99652	-3.97942	-5.18658	-6.15765	-2.78596	NA	NA	NA	NA	NA	NA
Ephb1	Q8CBF3	Ephb1	Q8CBF3	-2.11	0.12933	-7.14808	-4.93204	-6.73425	-2.91978	-3.69454	-5.87668	24.1658	26.3926	23.6499	27.077	26.5364	24.0829
Ephb2	P54763	Ephb2;Epha2	P54763	-0.388	0.283358	0.759878	-0.0262569	0.505904	0.706078	0.909867	0.786606	30.9349	30.8418	30.8026	30.9844	30.8342	30.7081
Ephb3	P54754	Ephb3	P54754;E0CYA3	0.0855	0.880984	-2.94564	-4.32847	-3.17923	-3.3398	-3.64091	-3.72915	27.3403	26.3972	26.8972	26.9626	26.273	26.7447
Ephb6	O08644	Ephb6	O08644	1.11	0.13599	-0.708645	-2.54158	-1.58809	-2.32276	-3.09944	-2.73541	28.818	28.555	28.8036	28.2893	27.4908	27.6695
Ephx1	Q9D379	Ephx1	Q9D379;E9PWK1;F6YTS6	-5.36	0.00187253	-6.3357	-5.98151	-3.90125	-0.168542	0.013966	0.00274963	23.8468	23.6078	25.8434	29.5173	29.1797	29.0536
Epm2aip1	Q8VEH5	Epm2aip1	Q8VEH5	-0.865	0.0195027	1.97718	2.11875	2.25681	2.82089	2.93406	3.19353	31.8007	31.8592	31.9325	32.0677	32.082	32.4639
Epn1	Q80VP1	Epn1	Q80VP1	0.473	0.219389	2.12445	2.97454	2.77817	2.13657	2.22511	2.09755	30.9459	30.9194	30.9473	30.4625	30.4507	30.5443
Epn2	J3QNT7	Epn2	J3QNT7;Q8CHU3;Q5NCM6;Q5NCM5	-0.232	0.486878	-0.0137251	-0.32141	-0.0453666	-0.266988	0.265964	0.315101	29.4403	29.3827	29.414	28.8412	29.1477	29.1738
Epn3	Q91W69	Epn3	Q91W69	0.553	0.312156	-2.61521	-2.78793	-1.67013	-2.40867	-3.09706	-3.22764	26.7871	26.3315	27.6026	26.7604	25.9827	25.8194
Eprs	Q8CGC7	Eprs	Q8CGC7	-4.67	6.86503e-05	-1.35233	-1.4562	-1.63665	3.06558	3.2311	3.26146	29.8971	29.5944	29.4859	34.0636	34.0802	34.1019
Eps15l1	Q60902	Eps15l1	Q60902;A0A1D5RLS1	-0.462	0.146142	1.60162	1.08608	1.56646	1.82357	1.88296	1.93254	31.8435	31.7894	31.967	31.9122	31.933	32.0129
Eps8	Q08509	Eps8	Q08509;Q3UGL1	0.685	0.132483	-0.621905	-0.37701	-0.334773	-1.70179	-1.00811	-0.680071	29.7505	29.0208	29.1882	29.1498	28.7509	28.703
Eps8l2	Q99K30	Eps8l2	Q99K30	-0.909	0.291297	-5.00994	-6.11098	-6.53727	-4.17904	-4.71107	-6.04215	24.9367	23.6611	24.2696	25.5344	24.913	24.2225
Eral1	Q9CZU4	Eral1	Q9CZU4	-7.55	6.92315e-05	-6.20664	-7.21258	-6.59952	0.734806	1.1084	0.788882	23.1841	24.3669	24.7377	29.7478	29.8939	29.7271
Erap1	Q9EQH2	Erap1	Q9EQH2	-2.18	0.0197153	-5.60915	-6.52177	-6.75517	-3.20757	-4.39821	-4.73326	24.3786	24.166	23.6738	26.6232	26.0486	25.671
Erbb4	Q61527	Erbb4;Erbb2;Map3k11	Q61527;B2KGF7	-1.84	0.00453321	-4.11693	-3.6769	-4.13315	-1.81391	-2.59266	-1.99084	26.3677	25.8522	26.2261	28.4228	27.8185	28.8963
Erc1	V9GWT6	Erc1	V9GWT6;V9GXH3;F8VPM7;Q99MI1;V9GXF0;V9GXP8;V9GX53	0.886	0.0595724	2.98441	3.53426	2.76432	1.95318	2.55399	2.1174	33.2924	33.5259	33.0735	32.1614	32.422	32.3922
Erc2	Q3UHT7	Erc2	Q3UHT7	0.68	0.405129	-5.33372	-3.11152	-3.72355	-4.50458	-4.65366	-5.04981	25.2998	27.2392	26.2621	25.2909	25.5134	25.2274
Ercc2	F6YA33	Ercc2	F6YA33;E9Q6K1;O08811;D3Z700	-3.22	0.00976207	-7.28677	-5.96612	-6.86507	-2.48864	-3.42742	-4.55503	23.2956	23.8798	24.3261	26.9134	25.9473	25.4659
Ercc3	P49135	Ercc3	P49135	-2.23	0.0414289	-5.33152	-6.47104	-7.82226	-3.93169	-4.78569	-4.207	23.4068	23.1181	24.5829	26.0592	25.0332	25.6736
Ercc4	Q9QZD4	Ercc4	Q9QZD4;F7A043	-1.98	0.00780827	-6.8493	-7.26236	-6.89002	-4.33849	-5.1707	-5.54131	23.7921	23.7837	24.5507	25.8059	24.7966	25.3897
Ercc5	E9QM61	Ercc5	E9QM61;P35689	-0.557	0.732263	-8.12145	-4.46899	-7.75997	-7.63417	-4.99148	-6.05227	22.5282	23.8504	22.6442	24.2914	25.5511	23.3852
Erg28	Q9ERY9	Erg28	Q9ERY9;D3YUR8	-1.12	0.00981923	1.22012	1.27349	1.58598	2.69194	2.43865	2.29901	28.8327	28.1901	28.7104	29.2776	29.4974	29.7977
Ergic1	F6SLP4	Ergic1	F6SLP4;A0A494BAW5;A0A494BAK4;Q9DC16;A0A494BAX4	-2.6	0.000886528	1.4196	1.44041	1.70765	3.84636	4.56098	3.9532	30.213	30.7105	30.4518	32.1312	32.3757	32.1893
Ergic2	Q9CR89	Ergic2	Q9CR89;A0A0N4SVQ6	-4.91	0.00747043	-3.44295	-6.31835	-6.69517	-0.684377	-0.508003	-0.540867	26.2395	24.2093	24.2671	28.2024	27.6704	28.2266
Ergic3	Q9CQE7	Ergic3	Q9CQE7;F6RK81;F6UIS1	-8.38	4.94181e-05	-6.74128	-7.01306	-7.28684	1.03741	1.64047	1.41459	24.6774	24.2121	24.7188	29.4906	29.7692	29.503
Erh	P84089	Erh	P84089;G3UW85;A0A1W2P7H9;A0A1W2P7T3	-5.88	0.000267719	0.116036	-0.935664	-1.45465	5.21384	5.03301	5.12094	27.4497	26.3791	26.0133	31.692	32.0681	32.0283
Eri3	Q8C460	Eri3	Q8C460	-0.797	0.0451669	1.11475	0.659689	0.447111	1.48351	1.676	1.45219	29.6399	29.7348	29.7231	30.1665	29.8359	29.5646
Erlec1	Q8VEH8	Erlec1	Q8VEH8;F6Z458	-5.63	0.00607578	-4.06128	-6.47082	-2.65372	1.10478	1.35502	1.24716	25.4857	23.4344	26.4188	30.6864	30.3593	30.2985
Erlin1	Q91X78	Erlin1	Q91X78	-3.15	0.000742942	-2.45551	-1.94298	-1.41945	1.13768	1.26499	1.23585	27.1215	27.4309	27.3842	29.9187	29.722	30.3467
Erlin2	Q8BFZ9	Erlin2	Q8BFZ9;A0A1B0GSD8;A0A1B0GT70;A0A1B0GQZ0	-2.48	0.000800087	1.87419	1.16462	1.4423	4.06943	3.9222	3.942	31.2356	30.7388	31.1089	32.9634	32.6988	32.6201
Ermp1	Q3UVK0	Ermp1	Q3UVK0	-3.02	0.0186282	-3.1805	-5.70133	-3.41577	-1.23777	-1.12597	-0.865491	27.1282	24.2843	26.018	28.6404	28.056	28.7356
Ero1a	Q8R180	Ero1a;Ero1l	Q8R180;A0A2I3BPM1	-3.63	0.000189435	-2.77524	-2.39691	-2.19521	1.06396	1.10523	1.35344	27.1748	27.2501	27.7084	30.3519	30.373	30.7857
Erp29	P57759	Erp29	P57759	-1.52	0.0028414	2.70878	2.5867	3.00621	4.43554	4.26065	4.16489	31.2487	30.6861	31.1227	32.63	32.3197	32.1754
Erp44	Q9D1Q6	Erp44	Q9D1Q6	-2.43	0.000954286	0.998197	0.971768	1.15193	3.12439	3.86744	3.43206	30.6125	30.583	30.5981	31.7908	32.0934	32.2151
Esco1	Q69Z69	Esco1	Q69Z69	0.868	0.0486838	-4.95572	-5.36663	-5.27678	-5.6339	-6.35603	-6.21251	25.2964	24.6922	24.8866	24.3849	23.5735	23.6842
Esd	H3BKH6	Esd	H3BKH6;Q9R0P3;H3BLJ9;H3BJL6;H3BJP2;H3BK43	0.37	0.173104	4.26963	4.25086	4.24742	4.07194	3.69932	3.88609	32.1577	32.9472	32.8668	32.3005	32.4334	32.6987
Espl1	P60330	Espl1	P60330	0.594	0.774759	-7.70352	-2.65386	-7.22303	-7.31946	-7.11868	-4.92434	NA	NA	NA	NA	NA	NA
Esrra	O08580	Esrra	O08580	-2.23	0.00905477	-6.83292	-7.05832	-6.88201	-3.79313	-5.00834	-5.27984	24.7237	23.6332	23.9056	25.2129	23.5896	23.4375
Esx1	O88933	Esx1	O88933	-3.95	0.0299546	-3.39479	-7.07277	-5.99636	-2.69351	-1.19133	-0.72759	24.5144	24.5331	23.5348	25.9136	26.62	26.8356
Esyt1	Q3U7R1	Esyt1	Q3U7R1;A0A1W2P784	-0.312	0.622487	-4.39653	-6.09048	-5.53724	-4.8189	-5.21067	-5.05963	25.8115	24.8659	25.5724	25.0008	24.54	24.3758
Esyt2	Q3TZZ7	Esyt2	Q3TZZ7	0.313	0.37748	-0.136768	0.208987	-0.23222	-0.704192	-0.361875	-0.0343041	30.1724	29.9618	29.9407	29.5616	29.3054	29.516
Etf1	Q8BWY3	Etf1	Q8BWY3	0.0168	0.950195	2.11017	2.50533	2.37455	2.28348	2.28531	2.37075	31.3	31.7551	31.8196	31.2536	31.5659	31.5911
Etfa	Q99LC5	Etfa	Q99LC5	-1.39	0.00277021	2.3191	2.53642	2.28555	3.7965	3.86231	3.6391	31.7551	31.6033	31.6978	32.6306	32.3291	32.3022
Etfb	Q9DCW4	Etfb;Etfbl	Q9DCW4;A0A0U1RNP5;A0A0N4SVE0;A0A0U1RNR3;A0A0N4SWE9;A0A0U1RNK9	-1.8	0.000925297	1.09028	0.867739	0.886332	2.72262	2.67069	2.86044	29.7236	29.8445	29.8627	30.8431	30.6809	30.7979
Etfdh	Q921G7	Etfdh	Q921G7;Q6PF96	-2.18	0.00712934	0.195276	-0.997931	-0.869925	1.50159	1.94679	1.41446	30.161	28.1006	29.9286	30.8339	31.1462	31.2093
Ethe1	Q9DCM0	Ethe1	Q9DCM0	-0.962	0.0795771	0.600402	1.47562	1.35176	1.60833	2.47292	2.23131	29.4479	30.0811	29.8524	30.4093	30.5488	30.605
Etl4	D3Z781	Etl4;Skt	D3Z781;E9QAU4;A2AQ25	0.0878	0.8363	-2.84445	-2.82858	-3.29077	-3.31281	-2.55512	-3.35926	28.1947	27.9122	27.674	27.541	28.0794	27.8119
Etnk1	A0A0N4SV10	Etnk1	A0A0N4SV10;A0A0N4SVC4;Q9D4V0	-2.62	0.0864315	-2.19033	-6.13405	-3.26673	-1.15527	-1.30212	-1.28639	26.6891	23.7861	26.3015	26.8772	26.9077	26.7753
Etv6	E9Q8J8	Etv6	E9Q8J8;P97360	-1.52	0.0427593	-5.58001	-4.55846	-5.86365	-3.36088	-3.6761	-4.40915	NA	NA	NA	NA	NA	NA
Evi5l	H3BKQ3	Evi5l;Evi5	H3BKQ3;H3BL92;H3BJ67	-0.349	0.386205	0.545188	-0.335144	0.312571	0.348238	0.738509	0.481422	30.596	30.2802	30.4664	30.0478	30.1244	30.2724
Evl	P70429	Evl	P70429;F8WJB9;E9PVP4;A0A1Y7VJA2	0.173	0.750427	1.09403	2.47011	1.66138	1.39302	1.86685	1.44569	30.5002	31.252	31.0574	30.2611	30.5149	30.3152
Evpl	Q9D952	Evpl	Q9D952	-2.29	0.00721347	-7.04046	-7.38144	-6.02949	-4.42411	-4.29087	-4.86224	24.0539	23.9382	23.5167	26.9282	26.972	26.368
Ewsr1	Q5SUT0	Ewsr1	Q5SUT0;Q5SUS9;Q61545	-9.01	5.93792e-05	-6.81755	-6.74145	-6.80046	1.6966	2.16177	2.82437	24.1128	24.0518	24.2292	30.5773	31.0174	31.0291
Exd2	Q8VEG4	Exd2	Q8VEG4;A0A1W2P7Q1	0.181	0.898465	-2.97246	-6.47429	-3.84789	-3.76186	-4.42392	-5.65147	26.0812	24.7035	26.1905	26.1069	25.8786	25.6765
Exoc1	Q6P1Y9	Exoc1	Q6P1Y9;Q5PPR2;Q8R3S6	0.377	0.168371	2.06599	1.87253	2.14484	1.73253	1.50178	1.71793	32.2586	31.8312	31.7281	31.8422	31.4855	31.3574
Exoc2	Q9D4H1	Exoc2	Q9D4H1	0.323	0.287775	0.833828	1.30414	0.983872	0.608099	0.634583	0.9111	31.126	31.2686	31.2824	31.1872	30.8512	30.8145
Exoc3	Q6KAR6	Exoc3	Q6KAR6	0.353	0.261029	1.60214	2.09658	1.56185	1.44214	1.28165	1.47676	31.7398	31.3637	31.4151	31.033	31.0122	30.9974
Exoc4	O35382	Exoc4	O35382;Q8C391	-0.0163	0.949007	1.55973	1.85094	1.80191	1.73759	1.80957	1.71444	32.0643	31.8884	32.1637	32.0903	32.1959	32.109
Exoc5	Q3TPX4	Exoc5	Q3TPX4;E9PZ92	0.556	0.07819	1.58101	2.01957	1.82121	1.24075	1.15265	1.35928	31.8415	31.7424	31.8211	31.3659	31.1685	31.027
Exoc6	Q3U9D6	Exoc6	Q3U9D6;Q8R313	-0.29	0.456397	-0.518395	-0.366155	-0.70638	-0.0233934	0.0537127	-0.750575	30.0291	29.4748	29.8216	29.789	29.5797	29.6422
Exoc6b	A6H5Z3	Exoc6b	A6H5Z3	0.67	0.124582	0.514738	0.016473	0.72766	0.0678113	-0.626774	-0.191567	30.4733	30.7714	30.5552	30.1616	30.0048	29.8591
Exoc7	O35250	Exoc7	O35250;A2AAN0	-0.0821	0.771719	1.78298	1.38848	1.71655	1.73906	1.5819	1.81343	31.4771	31.2478	31.4129	31.2238	31.0368	31.167
Exoc8	Q6PGF7	Exoc8	Q6PGF7	0.625	0.0432113	1.29371	1.4323	1.51989	0.657409	0.800465	0.913686	31.3735	31.691	31.4105	30.8742	30.9881	31.0444
Exog	Q8C163	Exog	Q8C163	-1.43	0.00431303	-0.0601328	-0.0454183	-0.187236	1.25815	1.08852	1.6403	28.9301	29.1006	28.8824	29.6089	29.8136	29.9589
Exosc10	P56960	Exosc10	P56960;Q8K366;F6VYQ6	-3.05	0.00681857	-6.35499	-6.08622	-7.17634	-3.67199	-4.25697	-2.53345	24.5963	23.6288	23.4622	26.9966	25.6529	27.277
Exosc2	Q8VBV3	Exosc2	Q8VBV3;A2AV19;A0A0A6YW57	-5.16	0.000448484	-5.37276	-6.97186	-6.04366	-0.907494	-1.18643	-0.826304	25.1836	23.9911	23.8355	27.1047	27.2325	27.7325
Exosc4	Q921I9	Exosc4	Q921I9	-3.82	0.00101877	-5.64354	-5.70297	-6.58189	-1.84483	-1.84466	-2.77964	23.7715	24.0863	23.5658	25.6268	25.5743	25.5976
Exosc5	Q9CRA8	Exosc5	Q9CRA8	-5.33	0.00154821	-8.62981	-6.76581	-6.28289	-1.90611	-1.9635	-1.831	24.3333	24.2231	23.5421	26.1374	25.9907	26.0905
Exosc7	Q9D0M0	Exosc7	Q9D0M0	-2.59	0.00305962	-6.76629	-5.62818	-6.31866	-3.89323	-3.27392	-3.78889	23.1321	24.4613	23.8568	25.1758	25.214	24.7252
Exosc8	Q9D753	Exosc8	Q9D753;F6SGT4;D3YYN3	-4.21	0.000177041	-6.83753	-7.34965	-6.99716	-3.04089	-3.03732	-2.48186	NA	NA	NA	NA	NA	NA
Exph5	Q0VAV2	Exph5	Q0VAV2	-0.326	0.600378	-6.6882	-6.20366	-7.67686	-6.80984	-6.75917	-6.02114	23.7209	24.5725	24.3882	24.2975	24.2782	25.0881
Ext1	P97464	Ext1	P97464	0.501	0.657203	-6.71144	-4.62468	-6.29135	-7.77054	-5.90972	-5.44954	NA	NA	NA	NA	NA	NA
Ext2	A2AIG3	Ext2	A2AIG3;E9Q1M5;V9GX32;P70428	-4.83	0.000446595	-7.61408	-6.95317	-6.6592	-1.59025	-2.69168	-2.46819	23.5386	23.4659	23.9501	25.488	25.4571	25.6478
Extl2	Q3TSR0	Extl2	Q3TSR0;Q9ES89	-4.49	0.0159267	-2.74545	-3.55363	-6.57537	0.0142697	0.199804	0.376177	26.6134	26.2053	24.3754	28.6542	28.09	27.8029
Extl3	Q6P1H4	Extl3	Q6P1H4;Q9WVL6	-4.98	0.00144817	-8.57557	-6.36884	-7.55676	-2.272	-2.54435	-2.75478	23.7281	23.7881	24.2581	27.9399	27.7507	27.1686
Eya2	O08575	Eya2	O08575	0.496	0.408418	-3.89692	-3.76598	-3.44055	-3.28139	-4.53769	-4.77093	24.9567	24.8808	25.1201	25.1479	24.4751	23.3853
Ezr	P26040	Ezr	P26040	-2.27	0.0178863	-2.94688	-4.55213	-2.79701	-0.888921	-1.15222	-1.45948	27.1001	27.3629	27.2044	28.4466	28.084	27.5948
F8a	Q9JJQ6	F8a;F8a1	Q9JJQ6;Q00558	0.194	0.860921	0.151441	-2.24123	0.160876	-0.422001	-1.72585	-0.362227	28.5258	27.3567	28.0949	27.3491	27.3109	27.2765
Faah	O08914	Faah	O08914	-0.307	0.218447	2.07226	1.90017	2.06996	2.24469	2.38579	2.33274	31.5222	30.8063	31.1744	31.2402	31.1018	31.0442
Faap100	A2ACJ2	Faap100	A2ACJ2	0.772	0.015607	0.454334	0.368564	0.376073	-0.346891	-0.36572	-0.403993	30.2126	30.253	30.0212	29.6272	29.5178	29.5803
Fabp3	P11404	Fabp3	P11404	0.746	0.024244	4.77387	4.45426	4.69952	3.89578	3.92646	3.86627	32.8331	32.3206	32.779	31.8069	31.6577	31.7514
Fabp5	Q05816	Fabp5	Q05816	-0.0691	0.879191	6.64912	6.17906	6.14458	5.82439	6.60303	6.75267	33.6299	33.4183	33.2952	33.3044	34.2002	34.2835
Fabp7	P51880	Fabp7	P51880;E9Q0H6	-3.04	0.000185029	1.29151	1.4346	1.24443	4.21094	4.331	4.54035	28.9252	28.6365	28.6378	31.7814	31.4795	31.6937
Fadd	Q61160	Fadd	Q61160	1.21	0.347108	-2.0024	-2.23082	-3.90287	-3.25057	-2.76754	-5.76116	25.8804	24.9959	24.7117	25.0382	24.6934	23.3684
Fads1	Q920L1	Fads1	Q920L1;A0A494BBC6	-1.64	0.00197296	0.175535	0.260253	0.410387	1.70535	1.92697	2.12427	29.3739	29.3855	29.9228	30.3195	30.411	30.4795
Fads2	Q9Z0R9	Fads2	Q9Z0R9	-2.68	0.0016224	-0.263421	-1.17437	-0.849596	1.79796	1.68083	2.26881	29.199	28.1545	28.6162	30.6793	30.0184	30.6772
Fads3	Q9JJE7	Fads3	Q9JJE7;A0A494BB03	-3.67	0.0795771	-1.50836	-6.20612	-6.33479	-0.62181	-0.881301	-1.54497	27.1732	23.1695	23.8879	27.8786	27.4334	26.9869
Faf1	P54731	Faf1	P54731	-0.464	0.390053	-0.203305	0.651869	-0.45571	0.308528	0.973863	0.103934	29.7196	29.8124	29.9331	29.4682	29.3499	29.0519
Faf2	Q3TDN2	Faf2	Q3TDN2;D3Z2H4	-1.06	0.077786	-0.618005	0.401017	-0.0794389	0.366344	1.201	1.3243	29.2694	29.5957	29.8226	29.4178	29.6689	29.7387
Fah	P35505	Fah	P35505	-0.169	0.86119	-2.33336	-4.5443	-2.02617	-2.8166	-2.89807	-2.6815	27.013	26.1137	27.1645	26.2277	25.5929	25.8791
Fahd1	Q8R0F8	Fahd1	Q8R0F8	-2.5	0.011158	-2.43428	-0.670329	-0.885695	1.18109	1.01476	1.31524	27.3188	27.7542	27.9145	29.3661	29.2481	29.5591
Fahd2a	A0A0R4J094	Fahd2a;Fahd2	A0A0R4J094;Q3TC72	-1.75	0.000832256	-0.77925	-0.740812	-0.872746	1.01693	0.961037	0.882054	28.3349	27.8089	27.8781	29.444	28.7776	28.6024
Faim	A0A087WRH2	Faim;Faiml	A0A087WRH2;D3Z3C1;Q9WUD8	-0.38	0.646756	-2.59779	-0.75302	-2.04488	-2.22502	-0.825974	-1.20357	26.5982	26.4097	27.0215	26.1591	26.0308	26.1711
Faim2	Q8K097	Faim2	Q8K097	4.8	0.0903149	0.0324296	0.018519	0.337186	-6.31833	-7.4291	-0.277934	26.4347	26.138	26.6099	24.3153	24.7489	25.769
Fam110b	Q8C739	Fam110b	Q8C739	1.12	0.635862	-6.96936	-1.64483	-1.96388	-4.64369	-2.76683	-6.53769	24.2999	26.6966	26.6804	25.3195	27.1071	23.2092
Fam114a2	Q8VE88	Fam114a2	Q8VE88	0.128	0.717045	-0.0889085	0.691964	0.369247	0.155987	0.142771	0.289211	29.5467	30.1713	29.9341	29.0099	29.3217	29.4313
Fam117b	Q3U3E2	Fam117b	Q3U3E2	0.698	0.180889	-2.61958	-1.64849	-1.94068	-2.48339	-3.29446	-2.52508	27.3077	27.1715	27.7313	26.834	26.4882	26.5868
FAM120A	Q6A0A9	FAM120A	Q6A0A9	-4.92	0.000724734	-5.40964	-4.12976	-3.72478	0.737607	0.466905	0.281279	26.5852	27.6989	27.978	31.1789	29.6645	30.9143
Fam120b	Q6RI63	Fam120b	Q6RI63	-2.37	0.0200059	-2.88602	-4.56892	-4.75575	-1.96764	-1.23034	-1.89681	27.0745	25.6891	25.5913	27.6137	28.1553	28.0821
Fam120c	Q8C3F2	Fam120c	Q8C3F2	-6.4	0.000374694	-5.031	-4.80314	-6.60321	1.06892	0.793432	0.91256	25.512	24.937	23.7515	30.9466	30.6815	30.7332
Fam124a	D3Z5V4	Fam124a	D3Z5V4	-0.204	0.787415	-0.311604	-2.02003	-1.80668	-0.602981	-1.27433	-1.64997	28.8489	27.2385	28.2335	28.1615	27.1675	27.2419
Fam126a	Q6P9N1	Fam126a	Q6P9N1	-0.0244	0.933283	-0.139561	-0.170237	-0.555039	-0.383637	-0.278025	-0.129882	29.3445	29.3806	29.0284	29.2716	29.2626	29.115
Fam126b	Q8C729	Fam126b	Q8C729	-0.0545	0.925372	-0.404661	-0.983055	-1.38268	-1.01834	-1.39011	-0.198494	28.1725	28.3157	28.7817	28.4617	28.114	28.5334
Fam131b	E9Q8P8	Fam131b	E9Q8P8;Q3TY60	-1.37	0.20548	-2.26863	0.685143	-0.713187	0.219687	1.11384	0.465191	27.7662	29.5549	28.1873	28.4523	29.4388	28.4517
Fam136a	Q9CR98	Fam136a	Q9CR98;A0A0N4SWI4	-1.54	0.00820819	1.44248	1.61389	1.244	2.4798	3.28503	3.15567	29.7849	29.9546	29.6531	30.504	30.8413	30.6302
Fam151b	D3YUE4	Fam151b	D3YUE4	-2.45	0.11006	-7.09042	-3.48038	-7.1557	-3.53655	-3.43528	-3.40207	23.3635	24.639	24.392	24.6325	24.6444	24.6449
Fam160a1	Q505K2	Fam160a1	Q505K2	-0.707	0.0970081	-7.08509	-6.42165	-6.88128	-5.72508	-6.18612	-6.35599	23.2204	23.6396	23.2575	24.404	24.5573	23.7137
Fam160a2	J3QP99	Fam160a2	J3QP99;A0A1C7CYU5;Q3U2I3;F8WHJ1	-5.3	0.00129381	-4.89881	-5.62625	-7.18853	-0.486315	-0.634832	-0.700326	25.8586	24.6438	23.5426	29.3559	29.5063	29.4073
Fam160b1	Q8CDM8	Fam160b1	Q8CDM8	-2.19	0.00177057	-2.89394	-3.54449	-3.216	-0.717344	-1.15036	-1.22454	27.2333	26.7005	27.4748	28.7489	28.8086	28.4737
Fam162a	Q9D6U8	Fam162a	Q9D6U8	-2.28	0.0128865	-0.0673754	1.61502	1.34332	3.08742	3.23042	3.40596	28.6681	29.9933	29.7341	30.781	30.9581	31.0323
Fam163b	Q8BUM6	Fam163b	Q8BUM6	-0.507	0.186852	-0.0870931	0.598756	0.272675	0.456019	0.868502	0.980029	27.5104	27.4355	27.6031	27.7133	27.8134	28.1149
Fam168a	A0A140LIJ1	Fam168a	A0A140LIJ1;Q8BGZ2;A0A140LJ81	-7.24	0.000195699	-6.60681	-7.17987	-6.35796	-0.383088	1.1457	0.800508	23.2506	24.9276	23.8076	28.0696	27.4732	27.5971
Fam168b	A0A087WSR1	Fam168b	A0A087WSR1;A0A087WNR1;E9Q917;G3UWF0;Q80XQ8	-4.23	0.350386	-7.55719	-7.46924	-0.344853	2.38087	2.08282	-7.14423	23.9244	23.5796	25.1445	26.4556	26.8777	23.9348
Fam169a	Q5XG69	Fam169a	Q5XG69	-8.22	4.94181e-05	-7.10752	-6.88968	-6.72815	1.09528	1.4312	1.41615	24.6381	24.6783	23.6036	30.1163	30.3526	30.3207
Fam171a1	A2ATL0	Fam171a1	A2ATL0;A2ATK9;A2ATL1	0.492	0.203159	-2.71555	-2.5237	-2.32958	-3.48512	-2.78506	-2.77573	27.3128	27.0641	27.5048	26.4133	26.9583	26.7932
Fam171a2	A2A699	Fam171a2	A2A699	1.19	0.00955231	1.36499	1.88155	1.80923	0.632184	0.529905	0.337566	31.1042	31.5089	31.4678	30.6689	30.2539	30.3552
Fam171b	Q14CH0	Fam171b	Q14CH0	0.943	0.140979	0.496106	-0.757771	0.812647	-0.825737	-0.872914	-0.579889	29.9736	29.7507	30.1529	29.1474	29.0531	29.3068
Fam173a	Q501J2	Fam173a	Q501J2;A0A494BBG1;Q91VW0;A0A494BBC9	-3.37	0.00842522	-7.09339	-5.70381	-6.33521	-2.07407	-2.83915	-4.11086	23.3201	24.0001	24.2002	26.0841	25.1559	24.8124
Fam177a1	Q8BR63	Fam177a1	Q8BR63	-0.553	0.472846	-0.0585565	0.0868099	0.205277	-0.589137	1.55656	0.92362	28.6395	28.4409	28.6925	27.6675	28.5902	28.2571
Fam181a	J3QNB7	Fam181a	J3QNB7	-1.5	0.322948	-3.40633	-6.17228	-6.91065	-3.03584	-3.48193	-5.46854	25.2027	24.3933	23.5939	25.4956	25.0037	25.0543
Fam185a	Q7TPD2	Fam185a	Q7TPD2	-3.87	0.0150657	-4.84354	-7.72572	-4.71078	-1.9623	-1.95488	-1.76711	25.6415	23.6779	25.6446	26.9272	26.9144	26.991
Fam192a	A0A1D5RLF2	Fam192a	A0A1D5RLF2;A0A1D5RLI3;A0A1D5RLY1;A0A1D5RLX7;A0A1D5RLW0;A0A1D5RLU2;Q91WE2;A0A1D5RLD7;A0A1D5RLT4;A0A1D5RLJ3	-6.52	0.000758503	-5.8849	-6.72597	-8.21908	-0.874503	-0.0273858	-0.379992	24.6758	24.0584	23.2402	26.2545	27.1192	26.6068
Fam205a4	C0HKD3	Fam205a4;Fam205a3;Fam205a2;Fam205a1	C0HKD3;C0HKD2;C0HKD1;D3YZF6	0.4	0.699233	-5.172	-6.73058	-4.65482	-5.96971	-6.94588	-4.84115	25.1999	24.0523	25.5876	24.4966	23.3455	25.1754
Fam20b	Q8VCS3	Fam20b	Q8VCS3	-5.61	0.00322051	-5.88905	-4.27712	-7.40437	0.122695	-0.615517	-0.261542	23.8908	24.8399	23.5288	28.8826	28.2739	28.3994
Fam210a	Q8BGY7	Fam210a	Q8BGY7	-1.53	0.00766725	-1.57019	-1.32653	-1.88967	0.019091	0.228342	-0.455229	27.5007	26.4247	27.2582	28.6866	28.1986	28.4669
Fam210b	Q9D8B6	Fam210b	Q9D8B6	-5.73	0.0292959	-1.93114	-6.3402	-7.95986	0.226541	0.277421	0.456652	26.9387	24.8617	24.818	27.1281	27.2179	27.1971
Fam214a	A0A1L1SSW7	Fam214a	A0A1L1SSW7;Q69ZK7	0.915	0.272905	-3.80538	-4.69336	-4.83725	-4.36673	-5.23727	-6.47661	26.6822	25.5102	25.5165	25.761	24.9278	24.1575
Fam216a	Q9DB54	Fam216a	Q9DB54	1.07	0.582183	0.289998	-0.0343368	-1.62448	0.36411	-4.67614	-0.280297	29.163	28.0497	25.8151	27.8769	24.0958	28.3672
Fam219a	A2ANP2	Fam219a	A2ANP2;A2ANP1;Q9D772	-4.38	0.00445467	-6.71356	-5.31593	-7.90063	-1.86169	-2.71525	-2.22485	24.3142	24.0739	24.3226	25.7225	24.7796	25.2372
Fam234a	F6SQM4	Fam234a	F6SQM4;Q8C0Z1;D3Z6P3	-0.652	0.606705	-4.27942	-4.00201	-4.78946	-5.82044	-2.67739	-2.61606	23.9606	25.7838	24.9361	23.8653	25.9404	25.9859
Fam234b	Q8BYI8	Fam234b	Q8BYI8	-5.38	0.00185399	-6.47612	-5.41788	-3.99368	0.267549	-0.419936	0.39534	24.2076	25.5512	26.3399	28.3882	28.2658	30.3496
Fam241a	A0A0H2UKC2	Fam241a	A0A0H2UKC2;Q9CZL2	0.722	0.777708	-2.53779	-6.58806	-2.09904	-1.16854	-5.66664	-6.55454	24.6341	24.0291	24.6161	25.202	24.2165	24.4531
Fam241b	D3Z7G3	Fam241b	D3Z7G3;D3YYX8;D3Z2E9;Q9D882;F8WHN9	-2.25	0.0024346	-1.07522	-0.65478	-1.14765	1.71745	1.28082	0.860497	27.4807	23.8245	27.2787	27.9817	27.6467	27.6893
Fam3a	I7HPY1	Fam3a	I7HPY1;I7HLV5;I7HJS7;Q9D8T0;J3JS95	-4.75	0.00030189	-6.29336	-6.42535	-7.30292	-2.30322	-1.83565	-1.64757	24.0246	23.422	23.9749	26.3028	25.8828	25.9627
Fam3c	G3X9I1	Fam3c	G3X9I1;G5E911;Q91VU0;E9Q6F0	-4.35	0.0290107	-1.2247	-5.64782	-2.61937	1.94728	0.776068	0.846796	26.6882	24.3092	27.3243	29.4342	28.6509	29.7926
Fam45a	Q9D8N2	Fam45a	Q9D8N2;Q3TH34	-2.27	0.0226422	-1.68814	-3.5038	-3.57506	-0.549311	-0.943928	-0.46715	27.6832	26.522	26.3956	28.3906	27.7902	27.6553
Fam49a	Q8BHZ0	Fam49a	Q8BHZ0	-0.0877	0.802285	3.75787	4.35118	4.22402	3.98214	4.16993	4.44412	32.7935	33.266	33.0935	32.5978	32.8006	32.9196
Fam49b	A0A2I3BQK1	Fam49b	A0A2I3BQK1	0.176	0.887758	-0.901541	1.51203	-1.215	-1.54419	0.258152	0.152453	26.5905	28.2029	26.1475	25.7146	26.9974	26.8788
Fam49b.1	Q921M7	Fam49b	Q921M7;A0A2I3BRN5	0.664	0.0565847	3.81381	3.95091	4.27971	3.17581	3.39096	3.48507	32.6459	33.0496	33.1262	31.9407	32.0283	32.2051
Fam50a	Q9WV03	Fam50a	Q9WV03	-5.3	0.0013077	-7.59353	-6.16851	-7.26834	-1.24599	-1.13442	-2.76401	23.7758	24.0679	23.9135	27.198	26.7475	26.9515
Fam71e1	A0A0U1RNU0	Fam71e1	A0A0U1RNU0	1.69	0.572858	-1.75035	-6.03886	-2.15566	-0.642256	-6.45157	-7.92775	27.0564	24.571	26.1408	27.4939	23.3589	23.7768
Fam81b	A0A140LI28	Fam81b	A0A140LI28	0.791	0.801524	-1.77597	-6.90054	-2.43146	-6.69906	-6.59564	-0.18499	27.2756	24.2307	26.8831	23.3059	23.701	28.9789
Fam89b	Q9QUI1	Fam89b	Q9QUI1;Q05DI7	-3.36	0.115444	-6.17817	-1.3869	-6.71182	-1.89733	-1.16904	-1.12305	NA	NA	NA	NA	NA	NA
Fam8a1	Q3URQ4	Fam8a1	Q3URQ4	-3.53	0.0016301	-7.12255	-5.8289	-7.07959	-3.48147	-2.90766	-3.05728	NA	NA	NA	NA	NA	NA
Fam91a1	Q3UVG3	Fam91a1	Q3UVG3	-0.133	0.613666	-1.2271	-1.55845	-1.2494	-1.20093	-1.27384	-1.16041	28.7546	28.4839	28.7601	28.5809	28.6313	28.686
Fam92b	Q3V2J0	Fam92b	Q3V2J0	-5.46	0.0222022	-0.967666	-5.17294	-0.368807	2.42995	3.44911	4.00136	27.8497	24.2762	28.319	31.0141	31.9439	32.4634
Fam98a	Q3TJZ6	Fam98a	Q3TJZ6;A0A3Q4EBV4	-3.41	0.00287578	-1.99705	-3.57454	-3.1079	0.0726574	0.875198	0.61143	27.8523	27.2622	27.9527	29.4626	28.8942	29.585
Fam98b	Q80VD1	Fam98b	Q80VD1	-4.36	0.00026019	-2.30104	-2.16122	-3.04251	1.57327	1.92997	2.06891	27.0503	26.8535	26.2679	30.4377	30.7655	30.832
Far1	Q922J9	Far1	Q922J9;D3Z5W6;D3Z4N9	-2.14	0.00204152	-2.46987	-1.82031	-1.942	0.311755	-0.221738	0.108715	28.3912	28.2818	28.1664	29.5315	28.902	28.9453
Farp1	F8VPU2	Farp1;Farp2	F8VPU2	-0.846	0.0117411	2.20403	2.13468	2.26997	3.07085	3.01753	3.05792	33.0065	32.5638	32.768	33.3854	32.9613	33.0728
Farsa	E9PWY9	Farsa	E9PWY9;Q8C0C7	-5.18	8.89455e-05	-1.64309	-0.992215	-1.54359	3.6835	3.77254	3.90302	28.6883	28.2985	28.1125	32.9407	32.8855	32.9575
Farsb	Q9WUA2	Farsb	Q9WUA2	-7.72	0.00175783	-2.52968	-6.27696	-4.90854	3.30377	3.08792	3.0437	26.4082	23.4203	27.0392	32.5392	32.1735	33.1849
Fasn	P19096	Fasn	P19096;A0A0U1RNJ1	0.684	0.0265746	5.25621	5.39548	5.1923	4.63713	4.58426	4.57102	36.7975	36.8192	36.7123	36.0731	36.0596	36.0592
[truncated: 4,771 more rows]
